# Supplementary material for: Identification of Novel Regulators of LINE-1 Expression via CRISPR/Cas9 Screening
Source: Research Square preprint supplement (doi:10.21203/rs.3.rs-6726282/v1), 2025-06-04
Supplement: Supplementary file 1 [file 0458c7ba9716de92f1a2b830.xlsx]

## Sheet: Sample key
Tab Name	Column in Tab	Column Annotation
ORF1p_positive_regulators
	Gene	Gene name
	gene-info	Gene information
	gene-location	Gene location
	gene-process	Gene process
	gene-function	Gene function
	Ref(TPM)	Gene RNA expression in original HCT116 cell line (TPM)
	Wild(TPM)	Gene RNA expression in HCT116 with L1 wildtype ORF2p reporter system (TPM)
	Mutant(TPM)	Gene RNA expression in HCT116 with L1 mutant ORF2p reporter system
	WAB1_WAB5	ORF2p wildtype; combined replicate A and B; L1 ORF1p positive regulator (TPM)
	WA1_WA5	ORF2p wildtype; replicate A only; L1 ORF1p positive regulator (p-value)
	WB1_WB5	ORF2p wildtype; replicate B only; L1 ORF1p positive regulator (p-value)
	MAB1_MAB5	ORF2p mutant; combined replicate A and B; L1 ORF1p positive regulator (p-value)
	MA1_MA5	ORF2p mutant; replicate A only; L1 ORF1p positive regulator (p-value)
	MB1_MB5	ORF2p mutant; replicate B only; L1 ORF1p positive regulator (p-value)
	WMAB1_WMAB5	Combined wildtype and mutant; Combined replicate A and B; L1 ORF1p positive regulator (p-value)
	Rank	Annotated rank
ORF1p_negative_regulators
	Gene	Gene name
	gene-info	Gene information
	gene-location	Gene location
	gene-process	Gene process
	gene-function	Gene function
	Ref(TPM)	Gene RNA expression in original HCT116 cell line (TPM)
	Wild(TPM)	Gene RNA expression in HCT116 with L1 wildtype ORF2p reporter system (TPM)
	Mutant(TPM)	Gene RNA expression in HCT116 with L1 mutant ORF2p reporter system
	WAB1_WAB5	ORF2p wildtype; combined replicate A and B; L1 ORF1p negative regulator (TPM)
	WA1_WA5	ORF2p wildtype; replicate A only; L1 ORF1p negative regulator (p-value)
	WB1_WB5	ORF2p wildtype; replicate B only; L1 ORF1p negative regulator (p-value)
	MAB1_MAB5	ORF2p mutant; combined replicate A and B; L1 ORF1p negative regulator (p-value)
	MA1_MA5	ORF2p mutant; replicate A only; L1 ORF1p negative regulator (p-value)
	MB1_MB5	ORF2p mutant; replicate B only; L1 ORF1p negative regulator (p-value)
	WMAB1_WMAB5	Combined wildtype and mutant; Combined replicate A and B; L1 ORF1p negative regulator (p-value)
	Rank	Annotated rank
ORF2p_negative_regulator
	gene	Gene name
	gene-info	Gene information
	gene-location	Gene location
	gene-process	Gene process
	gene-function	Gene function
	pos|score	positive selection | RRA score
	pos|p-value	positive selection | p value
	pos|fdr	positive selection | False discover rate
	pos|rank	positive selection | ranking
	pos|goodsgrna	positive selection | number of good sgRNA
	pos|lfc	positive selection | log fold change
ORF2p_lethality_regulator
	Gene	Selected ORF2p lethality gene name
	gene-info	Gene information
	gene-location	Gene location
	gene-process	Gene process
	gene-function	Gene function
	FDR_wt	False discovery rate of the gene is screened under ORF2p wildtype setting
	FDR_mt	False discovery rate of the gene is screened under ORF2p mutant setting

## Sheet: ORF1p_positive_regulators
Gene	gene-info	gene-location	gene-process	gene-function	Ref(TPM)	Wild(TPM)	Mutant(TPM)	WAB1_WAB5	WA1_WA5	WB1_WB5	MAB1_MAB5	MA1_MA5	MB1_MB5	WMAB1_WMAB5	Rank
YEATS2	YEATS domain containing 2	Ada2/Gcn5/Ada3 transcription activator complex|mitotic spindle|	negative regulation of transcription from RNA polymerase II promoter|chromatin organization|histone H3 acetylation|negative regulation of transcription, DNA-templated|	protein binding|TBP-class protein binding|	6.11873	6.01605	5.91359	0.019876	0.011735	0.040185	3.8233e-05	0.01039	0.00097532	0.00085113	Rank1
TAF6L	TAF6-like RNA polymerase II, p300/CBP-associated factor (PCAF)-associated factor, 65kDa	histone deacetylase complex|STAGA complex|	chromatin organization|chromatin remodeling|DNA-templated transcription, initiation|regulation of transcription from RNA polymerase II promoter|histone H3 acetylation|regulation of sequence-specific DNA binding transcription factor activity|	DNA binding|transcription coactivator activity|histone acetyltransferase activity|protein binding|protein heterodimerization activity|	5.41999	6.59302	7.69222	0.023415	0.02708	0.035812	0.00024454	0.0027622	8.4676e-06	5.3885e-06	Rank1
DDX6	DEAD (Asp-Glu-Ala-Asp) box helicase 6	cytoplasmic mRNA processing body|cytoplasm|cytosol|cytoplasmic stress granule|membrane|RISC complex|intracellular membrane-bounded organelle|	nuclear-transcribed mRNA catabolic process, deadenylation-dependent decay|ATP catabolic process|gene expression|RNA metabolic process|mRNA metabolic process|cytoplasmic mRNA processing body assembly|exonucleolytic nuclear-transcribed mRNA catabolic process involved in deadenylation-dependent decay|	RNA helicase activity|helicase activity|protein binding|ATP binding|ATP-dependent helicase activity|poly(A) RNA binding|	73.486	79.1036	68.4743	1.283e-06	1.7962e-06	3.8748e-05	2.566e-07	4.8497e-05	2.566e-07	2.566e-07	Rank1
SETX	senataxin	nucleus|nucleoplasm|nucleolus|cytoplasm|	double-strand break repair|termination of RNA polymerase II transcription|RNA processing|circadian rhythm|cell death|DNA duplex unwinding|	DNA binding|DNA helicase activity|ATP binding|	9.22039	10.8774	10.0133	0.00047598	0.029878	0.001155	0.00021169	0.0019868	9.2118e-05	2.566e-07	Rank1
ZNF598	zinc finger protein 598	None	None	zinc ion binding|poly(A) RNA binding|	12.1946	12.3372	13.9757	0.00022144	0.0055171	0.02912	0.0031102	0.0035546	0.011664	2.566e-07	Rank1
SBDS	Shwachman-Bodian-Diamond syndrome	spindle pole|nucleus|nucleoplasm|nucleolus|cytoplasm|	inner cell mass cell proliferation|rRNA processing|cell proliferation|bone mineralization|leukocyte chemotaxis|mature ribosome assembly|ribosomal large subunit biogenesis|mitotic spindle stabilization|bone marrow development|	protein binding|microtubule binding|rRNA binding|ribosome binding|poly(A) RNA binding|	39.3274	36.3627	35.2853	0.031449	0.023229	0.25623	0.015269	0.017519	0.02574	0.0010451	Rank1
INTS10	integrator complex subunit 10	integrator complex|	snRNA processing|	protein binding|protein binding|	40.6102	39.2422	40.0211	0.030464	0.023229	0.56951	0.0073533	0.022862	0.014608	0.00066022	Rank1
EIF5B	eukaryotic translation initiation factor 5B	cytosol|	GTP catabolic process|translation|translational initiation|regulation of translational initiation|regulation of translational initiation|gene expression|cellular protein metabolic process|	translation initiation factor activity|translation initiation factor activity|GTPase activity|protein binding|GTP binding|poly(A) RNA binding|	63.0932	57.1471	55.5232	0.00018347	0.0078808	0.0033582	0.0032298	0.43379	2.566e-07	0.00071513	Rank1
TTI2	TELO2 interacting protein 2	None	None	None	12.4756	13.5305	13.139	0.016301	0.014152	0.037681	0.01788	0.10003	0.0011159	0.049732	Rank1
MORC2	MORC family CW-type zinc finger 2	nucleus|cytoplasm|cytosol|	None	ATP binding|zinc ion binding|	18.7671	17.3434	18.2596	0.018338	0.54623	0.0055199	0.00097737	0.037052	0.0069109	0.0064567	Rank1
MED12	mediator complex subunit 12	nucleus|nucleoplasm|membrane|mediator complex|	neural tube closure|transcription initiation from RNA polymerase II promoter|transcription initiation from RNA polymerase II promoter|heart development|gene expression|oligodendrocyte development|Schwann cell development|stem cell maintenance|negative regulation of Wnt signaling pathway|intracellular steroid hormone receptor signaling pathway|androgen receptor signaling pathway|positive regulatio…	RNA polymerase II distal enhancer sequence-specific DNA binding|RNA polymerase II transcription cofactor activity|RNA polymerase II transcription factor binding transcription factor activity involved in positive regulation of transcription|chromatin binding|transcription cofactor activity|transcription coactivator activity|receptor activity|protein binding|beta-catenin binding|protein C-terminus …	3.59223	4.02459	3.95578	0.0026519	0.017892	0.0011735	0.03963	0.51842	0.00052628	0.0026591	Rank1
DCTN1	dynactin 1	kinetochore|spindle pole|cytoplasm|centrosome|cytosol|dynactin complex|microtubule|membrane|dynein complex|cell leading edge|	G2/M transition of mitotic cell cycle|mitotic cell cycle|activation of signaling protein activity involved in unfolded protein response|mitotic nuclear division|nervous system development|cell death|microtubule-based transport|antigen processing and presentation of exogenous peptide antigen via MHC class II|endoplasmic reticulum unfolded protein response|cellular protein metabolic process|	motor activity|protein binding|dynein binding|	126.23	145.051	151.184	0.018541	0.12997	0.010597	0.009775	0.0109	0.0021546	0.011669	Rank1
CREBBP	CREB binding protein	histone acetyltransferase complex|nuclear chromatin|condensed chromosome outer kinetochore|nucleus|nucleus|nucleoplasm|transcription factor complex|cytoplasm|nuclear body|	negative regulation of transcription from RNA polymerase II promoter|response to hypoxia|chromatin organization|regulation of transcription, DNA-templated|regulation of transcription, DNA-templated|transcription initiation from RNA polymerase II promoter|protein complex assembly|signal transduction|Notch signaling pathway|regulation of smoothened signaling pathway|gene expression|viral process|hi…	core promoter proximal region sequence-specific DNA binding|RNA polymerase II core promoter proximal region sequence-specific DNA binding transcription factor activity involved in negative regulation of transcription|RNA polymerase II transcription factor binding|RNA polymerase II activating transcription factor binding|RNA polymerase II transcription coactivator activity|RNA polymerase II transc…	6.51735	8.07618	8.41902	0.04558	0.8197	0.010323	0.0037553	0.022863	0.012388	0.0061052	Rank1
GTF3C3	general transcription factor IIIC, polypeptide 3, 102kDa	transcription factor TFIIIC complex|nucleoplasm|	transcription, DNA-templated|transcription from RNA polymerase III promoter|transcription from RNA polymerase III promoter|gene expression|5S class rRNA transcription from RNA polymerase III type 1 promoter|tRNA transcription from RNA polymerase III promoter|	DNA binding|protein binding|	32.8726	32.6459	28.5591	0.010384	0.0099592	0.010187	0.041691	0.022863	0.9258	0.0036593	Rank1
MEPCE	methylphosphate capping enzyme	None	negative regulation of transcription from RNA polymerase II promoter|RNA methylation|snRNA metabolic process|negative regulation of chromatin binding|snRNA modification|positive regulation of G1/S transition of mitotic cell cycle|	RNA methyltransferase activity|S-adenosylmethionine-dependent methyltransferase activity|poly(A) RNA binding|	10.7888	10.8556	12.2399	0.0078069	0.10163	0.00042571	0.015045	0.010389	0.0082714	0.00025788	Rank1
EIF4A1	eukaryotic translation initiation factor 4A1	cytosol|membrane|eukaryotic translation initiation factor 4F complex|extracellular vesicular exosome|	nuclear-transcribed mRNA catabolic process, deadenylation-dependent decay|nuclear-transcribed mRNA poly(A) tail shortening|ATP catabolic process|translation|translational initiation|gene expression|viral process|RNA metabolic process|mRNA metabolic process|cytokine-mediated signaling pathway|organ regeneration|cellular protein metabolic process|	RNA cap binding|double-stranded RNA binding|mRNA binding|translation initiation factor activity|helicase activity|protein binding|ATP binding|ATP-dependent helicase activity|translation factor activity, nucleic acid binding|poly(A) RNA binding|	2544.9	2425.47	2697.69	0.016897	0.00052268	0.010187	0.013435	0.0019873	0.22058	0.00067664	Rank1
COA6	cytochrome c oxidase assembly factor 6 homolog (S. cerevisiae)	cellular_component|mitochondrion|	biological_process|hydrogen ion transmembrane transport|	molecular_function|cytochrome-c oxidase activity|poly(A) RNA binding|	36.8791	30.7568	35.8205	0.0092726	0.013111	0.04891	0.012314	0.0024266	0.8816	0.011669	Rank1
ATXN10	ataxin 10	extracellular space|cytoplasm|cytosol|plasma membrane|membrane|dendrite|neuronal cell body|perinuclear region of cytoplasm|	nervous system development|cell death|neuron projection development|	protein binding|identical protein binding|	73.9814	75.4545	73.9831	0.00016448	0.016143	0.01229	0.016319	0.022862	0.20732	0.00062994	Rank1
NFIX	nuclear factor I/X (CCAAT-binding transcription factor)	nucleus|	negative regulation of transcription from RNA polymerase II promoter|DNA replication|transcription from RNA polymerase II promoter|cerebellar Purkinje cell layer development|cerebellar granule cell differentiation|positive regulation of transcription from RNA polymerase II promoter|astrocyte differentiation|	DNA binding|sequence-specific DNA binding transcription factor activity|RNA polymerase II distal enhancer sequence-specific DNA binding transcription factor activity|	17.1185	17.9017	18.6024	0.031449	0.034511	0.20469	0.0024292	0.0034484	0.21395	0.00022503	Rank1
UFM1	ubiquitin-fold modifier 1	nucleus|cytoplasm|extracellular vesicular exosome|	response to endoplasmic reticulum stress|protein ufmylation|	None	5.96799	5.73029	5.4652	0.010512	0.010338	0.52323	0.039258	0.26949	0.0027181	0.039509	Rank1
CLPX	caseinolytic mitochondrial matrix peptidase chaperone subunit	mitochondrion|mitochondrial inner membrane|mitochondrial matrix|endopeptidase Clp complex|mitochondrial endopeptidase Clp complex|mitochondrial nucleoid|	ATP catabolic process|protein folding|positive regulation of peptidase activity|proteolysis involved in cellular protein catabolic process|	ATP-dependent peptidase activity|protein binding|ATP binding|peptidase activator activity|ATPase activity|ATPase activity|metal ion binding|unfolded protein binding|	30.2027	27.5847	23.0201	0.0054534	0.28276	0.0094578	0.03963	0.022863	0.36063	0.011669	Rank1
LSM5	LSM5 homolog, U6 small nuclear RNA associated (S. cerevisiae)	nucleus|spliceosomal complex|cytosol|	nuclear-transcribed mRNA catabolic process, deadenylation-dependent decay|mRNA processing|RNA splicing|gene expression|RNA metabolic process|mRNA metabolic process|exonucleolytic nuclear-transcribed mRNA catabolic process involved in deadenylation-dependent decay|	RNA binding|protein binding|	95.2725	85.053	77.196	0.0060369	0.0031097	0.75196	0.039631	0.25044	0.009581	0.004541	Rank1
MED14	mediator complex subunit 14	nucleus|nucleoplasm|membrane|mediator complex|	regulation of transcription from RNA polymerase II promoter|transcription initiation from RNA polymerase II promoter|transcription initiation from RNA polymerase II promoter|gene expression|stem cell maintenance|intracellular steroid hormone receptor signaling pathway|androgen receptor signaling pathway|positive regulation of transcription, DNA-templated|positive regulation of transcription from …	RNA polymerase II transcription cofactor activity|transcription cofactor activity|transcription coactivator activity|receptor activity|ligand-dependent nuclear receptor transcription coactivator activity|vitamin D receptor binding|thyroid hormone receptor binding|	6.35523	6.74921	5.86398	0.00043031	0.81393	0.00032256	0.077284	0.0090016	0.012388	0.014689	Rank1
SRSF9	serine/arginine-rich splicing factor 9	nucleus|nucleoplasm|nucleolus|	mRNA splicing, via spliceosome|transcription from RNA polymerase II promoter|termination of RNA polymerase II transcription|mRNA splice site selection|mRNA processing|mRNA export from nucleus|RNA splicing|gene expression|mRNA 3'-end processing|negative regulation of mRNA splicing, via spliceosome|	nucleotide binding|protein binding|poly(A) RNA binding|	135.994	145.666	190.924	0.039686	0.01979	0.27651	0.04169	0.018321	0.22258	0.005787	Rank1
RIOK2	RIO kinase 2	None	protein phosphorylation|	protein serine/threonine kinase activity|ATP binding|	17.5568	15.9021	13.7777	0.020332	0.81393	0.0014778	0.0043177	0.0026786	0.39744	0.0017035	Rank1
ARNTL2	aryl hydrocarbon receptor nuclear translocator-like 2	nucleus|nucleus|transcription factor complex|nucleolus|cytoplasm|	regulation of transcription, DNA-templated|regulation of transcription from RNA polymerase II promoter|transcription from RNA polymerase II promoter|signal transduction|circadian rhythm|entrainment of circadian clock|positive regulation of circadian rhythm|positive regulation of transcription, DNA-templated|positive regulation of transcription from RNA polymerase II promoter|	RNA polymerase II core promoter proximal region sequence-specific DNA binding transcription factor activity|sequence-specific DNA binding transcription factor activity|sequence-specific DNA binding transcription factor activity|signal transducer activity|protein dimerization activity|E-box binding|	21.5613	19.0125	19.1509	0.00044776	0.029416	0.036982	0.06463	0.010389	0.51041	0.00061865	Rank1
TADA1	transcriptional adaptor 1	nucleus|cytoplasm|focal adhesion|STAGA complex|	chromatin organization|transcription, DNA-templated|regulation of transcription, DNA-templated|histone H3 acetylation|	transcription coactivator activity|histone acetyltransferase activity|	5.39687	5.24483	5.02192	0.039686	0.16331	0.14815	9.0065e-05	0.0090016	0.001176	0.0005468	Rank1
ITPA	inosine triphosphatase (nucleoside triphosphate pyrophosphatase)	cytosol|	ITP catabolic process|deoxyribonucleoside triphosphate catabolic process|small molecule metabolic process|chromosome organization|nucleobase-containing small molecule metabolic process|	nucleotide binding|dITP diphosphatase activity|ITP diphosphatase activity|XTP diphosphatase activity|metal ion binding|	48.9645	49.2204	47.7914	0.03112	0.1905	0.0059233	0.011369	0.0071398	0.20732	0.0030276	Rank1
GTF3A	general transcription factor IIIA	nucleus|nucleoplasm|	regulation of transcription, DNA-templated|transcription from RNA polymerase III promoter|rRNA transcription|gene expression|	DNA binding|RNA binding|metal ion binding|	96.372	91.6924	84.2075	1.7962e-06	0.00010136	0.018144	0.051869	0.12224	0.010714	0.00086601	Rank1
RAPH1	Ras association (RalGDS/AF-6) and pleckstrin homology domains 1	cytoplasm|cytoskeleton|plasma membrane|lamellipodium|filopodium|	cell-matrix adhesion|signal transduction|axon extension|	None	4.31148	4.35324	4.53339	1.283e-06	0.023229	0.0011735	0.073188	0.022862	0.83609	0.0028305	Rank1
TRIM27	tripartite motif containing 27	nucleus|nucleoplasm|cytoplasm|endosome|early endosome|integral component of plasma membrane|membrane|PML body|retromer complex|nuclear membrane|	negative regulation of transcription from RNA polymerase II promoter|negative regulation of adaptive immune response|transcription, DNA-templated|negative regulation of protein kinase activity|spermatogenesis|cell proliferation|peptidyl-tyrosine phosphorylation|negative regulation of tumor necrosis factor production|negative regulation of viral transcription|Arp2/3 complex-mediated actin nucleati…	nucleic acid binding|DNA binding|transmembrane receptor protein tyrosine kinase activity|ubiquitin-protein transferase activity|ubiquitin-protein transferase activity|protein binding|zinc ion binding|ligase activity|metal ion binding|	18.8436	19.6882	18.6158	0.0098468	0.011031	0.025367	0.06289	0.12224	0.025252	0.001703	Rank1
RBM15	RNA binding motif protein 15	nucleus|nuclear membrane|	patterning of blood vessels|positive regulation of transcription of Notch receptor target|viral process|negative regulation of myeloid cell differentiation|spleen development|ventricular septum morphogenesis|placenta blood vessel development|	nucleotide binding|protein binding|poly(A) RNA binding|	5.85729	6.78153	7.25064	0.010625	0.0023686	0.099967	0.0061467	0.0075123	0.29477	0.00086601	Rank1
MED4	mediator complex subunit 4	nucleus|nucleoplasm|membrane|mediator complex|	regulation of transcription from RNA polymerase II promoter|transcription from RNA polymerase II promoter|transcription initiation from RNA polymerase II promoter|transcription initiation from RNA polymerase II promoter|gene expression|intracellular steroid hormone receptor signaling pathway|androgen receptor signaling pathway|positive regulation of transcription, DNA-templated|	RNA polymerase II transcription cofactor activity|transcription cofactor activity|receptor activity|protein binding|ligand-dependent nuclear receptor transcription coactivator activity|vitamin D receptor binding|thyroid hormone receptor binding|	34.9595	35.5062	34.5058	0.02958	0.038653	0.032025	0.062889	0.016761	0.19016	0.0039005	Rank1
CWF19L1	CWF19-like 1, cell cycle control (S. pombe)	cellular_component|	biological_process|metabolic process|	molecular_function|catalytic activity|	21.0634	23.0657	20.387	0.0022834	0.20661	0.0054352	0.030675	0.015259	0.43284	0.0056366	Rank1
LDB1	LIM domain binding 1	nuclear chromatin|nucleus|transcription factor complex|protein complex|	transcription-dependent tethering of RNA polymerase II gene DNA at nuclear periphery|gastrulation with mouth forming second|hair follicle development|transcription, DNA-templated|regulation of transcription, DNA-templated|transcription from RNA polymerase II promoter|multicellular organismal development|anterior/posterior axis specification|epithelial structure maintenance|Wnt signaling pathway|c…	RNA polymerase II activating transcription factor binding|enhancer sequence-specific DNA binding|chromatin binding|transcription corepressor activity|enzyme binding|LIM domain binding|LIM domain binding|protein homodimerization activity|protein self-association|	13.1911	15.1537	15.1332	0.0079563	0.81393	0.0030867	0.014416	0.022862	0.24226	0.0037768	Rank1
PPHLN1	periphilin 1	nucleus|cytoplasm|Golgi apparatus|intracellular membrane-bounded organelle|	keratinization|	poly(A) RNA binding|	98.2169	94.9565	82.4194	0.0037794	0.021725	0.18579	0.001799	0.051142	7.6979e-07	2.2837e-05	Rank1
TRAPPC11	trafficking protein particle complex 11	Golgi apparatus|	vesicle-mediated transport|	None	10.2379	10.6678	9.38019	0.00030458	0.10621	0.0012397	0.0061473	0.0109	0.44644	7.6979e-07	Rank1
PPP1CA	protein phosphatase 1, catalytic subunit, alpha isozyme	protein phosphatase type 1 complex|nucleus|nucleolus|cytoplasm|cytosol|glycogen granule|dendritic spine|perikaryon|extracellular vesicular exosome|MLL5-L complex|PTW/PP1 phosphatase complex|	glycogen metabolic process|regulation of glycogen biosynthetic process|regulation of glycogen catabolic process|protein dephosphorylation|protein dephosphorylation|cell cycle|transforming growth factor beta receptor signaling pathway|triglyceride catabolic process|lung development|negative regulation of transforming growth factor beta receptor signaling pathway|circadian regulation of gene expres…	protein serine/threonine phosphatase activity|protein binding|phosphatase activity|ribonucleoprotein complex binding|metal ion binding|	289.215	318.17	307.097	0.0042885	0.023229	0.036982	0.47597	0.44278	0.047782	0.011935	Rank1
CUL4B	cullin 4B	nucleus|cytoplasm|plasma membrane|Cul4B-RING E3 ubiquitin ligase complex|extracellular vesicular exosome|	ubiquitin-dependent protein catabolic process|cell cycle|histone H2A monoubiquitination|positive regulation of protein catabolic process|UV-damage excision repair|positive regulation of G1/S transition of mitotic cell cycle|	damaged DNA binding|protein binding|ubiquitin protein ligase binding|	241.708	274.686	243.602	0.0052512	0.24163	0.033542	0.04169	0.01526	0.15236	0.0007839	Rank1
CMTR1	cap methyltransferase 1	nucleus|cytoplasm|	7-methylguanosine mRNA capping|7-methylguanosine mRNA capping|mRNA methylation|cap1 mRNA methylation|	nucleic acid binding|mRNA (nucleoside-2'-O-)-methyltransferase activity|	7.42845	7.89017	8.0908	0.029047	0.00324	0.42163	5.1576e-05	4.8753e-06	0.35384	0.036927	Rank1
TSC2	tuberous sclerosis 2	nucleus|cytoplasm|cytoplasm|Golgi apparatus|cytosol|cytosol|caveola|membrane|dendrite|growth cone|TSC1-TSC2 complex|neuronal cell body|perinuclear region of cytoplasm|	response to hypoxia|neural tube closure|negative regulation of protein kinase activity|protein import into nucleus|endocytosis|acute-phase response|cell cycle arrest|epidermal growth factor receptor signaling pathway|heart development|protein localization|negative regulation of cell proliferation|insulin receptor signaling pathway|fibroblast growth factor receptor signaling pathway|phosphatidylin…	GTPase activator activity|protein binding|phosphatase binding|protein homodimerization activity|protein heterodimerization activity|14-3-3 protein binding|	46.8001	56.0274	56.0658	0.037915	0.02708	0.096235	0.01463	0.3924	0.00040619	0.0030271	Rank1
NPM1	nucleophosmin (nucleolar phosphoprotein B23, numatrin)	nucleus|nucleus|nucleoplasm|nucleoplasm|nucleolus|cytoplasm|cytoplasm|centrosome|centrosome|cytosol|membrane|ribonucleoprotein complex|spindle pole centrosome|	DNA repair|nucleosome assembly|nucleosome assembly|intracellular protein transport|nucleocytoplasmic transport|nucleocytoplasmic transport|response to stress|centrosome cycle|centrosome cycle|signal transduction|cell aging|cell aging|protein localization|negative regulation of cell proliferation|negative regulation of cell proliferation|negative regulation of centrosome duplication|viral process|…	transcription coactivator activity|RNA binding|protein kinase inhibitor activity|protein binding|protein kinase binding|Tat protein binding|histone binding|protein homodimerization activity|ribosomal large subunit binding|ribosomal small subunit binding|poly(A) RNA binding|protein heterodimerization activity|NF-kappaB binding|NF-kappaB binding|unfolded protein binding|unfolded protein binding|	13762.7	12176.8	12761.1	0.003665	0.012786	2.951e-05	0.015269	0.0069278	0.43179	0.10264	Rank3
RUVBL2	RuvB-like AAA ATPase 2	Swr1 complex|intracellular|nucleus|nucleoplasm|nuclear euchromatin|cytoplasm|membrane|nuclear matrix|ribonucleoprotein complex|Ino80 complex|NuA4 histone acetyltransferase complex|extracellular vesicular exosome|MLL1 complex|	ATP catabolic process|DNA repair|DNA recombination|chromatin organization|chromatin remodeling|transcription, DNA-templated|protein folding|DNA duplex unwinding|DNA duplex unwinding|DNA duplex unwinding|cellular response to UV|positive regulation of histone acetylation|regulation of growth|histone H4 acetylation|histone H2A acetylation|positive regulation of transcription from RNA polymerase II p…	RNA polymerase II core promoter sequence-specific DNA binding|RNA polymerase II distal enhancer sequence-specific DNA binding|DNA helicase activity|damaged DNA binding|ATP-dependent DNA helicase activity|protein binding|ATP binding|ATPase activity|chromatin DNA binding|identical protein binding|identical protein binding|ATP-dependent 5'-3' DNA helicase activity|unfolded protein binding|	251.028	241.314	278.859	0.039686	0.023229	0.027809	0.060469	0.022863	0.92768	0.037533	Rank1
CCT7	chaperonin containing TCP1, subunit 7 (eta)	zona pellucida receptor complex|cytoplasm|mitochondrion|cytosol|chaperonin-containing T-complex|microtubule|cell body|extracellular vesicular exosome|	protein folding|binding of sperm to zona pellucida|cellular protein metabolic process|'de novo' posttranslational protein folding|	ATP binding|identical protein binding|unfolded protein binding|	1586.24	1491.77	1566.11	0.00086652	0.0004883	0.017014	0.22316	0.41552	0.0065075	0.017091	Rank1
SMC3	structural maintenance of chromosomes 3	chromosome, centromeric region|chromatin|lateral element|spindle pole|basement membrane|nucleus|nucleoplasm|chromosome|cytoplasm|cytosol|cohesin complex|nuclear matrix|meiotic cohesin complex|nuclear meiotic cohesin complex|	mitotic cell cycle|regulation of DNA replication|DNA repair|mitotic spindle organization|sister chromatid cohesion|sister chromatid cohesion|mitotic nuclear division|meiotic nuclear division|signal transduction|stem cell maintenance|negative regulation of DNA endoreduplication|	chromatin binding|microtubule motor activity|protein binding|ATP binding|mediator complex binding|dynein binding|protein heterodimerization activity|	14.7179	13.7959	12.5534	7.9545e-06	0.0074087	0.0011971	0.31795	0.45589	0.0070325	0.024064	Rank1
EDC4	enhancer of mRNA decapping 4	cytoplasmic mRNA processing body|nucleus|cytoplasm|cytosol|membrane|intracellular membrane-bounded organelle|	nuclear-transcribed mRNA catabolic process, deadenylation-dependent decay|biological_process|gene expression|RNA metabolic process|mRNA metabolic process|exonucleolytic nuclear-transcribed mRNA catabolic process involved in deadenylation-dependent decay|	protein binding|	23.0855	25.4024	26.2736	0.0046806	0.13559	0.080595	4.3621e-06	0.00095736	7.6979e-07	2.566e-07	Rank1
SLC27A3	solute carrier family 27 (fatty acid transporter), member 3	membrane|integral component of membrane|mitochondrial membrane|	fatty acid metabolic process|	nucleotide binding|fatty-acyl-CoA synthase activity|ligase activity|	3.94084	4.25305	5.04534	0.023171	0.016143	0.002573	0.13686	0.045689	0.80211	0.00073822	Rank1
CMIP	c-Maf inducing protein	nucleus|cytoplasm|	None	protein binding|	15.1601	15.8667	17.2851	0.0051583	0.12166	0.089031	0.0020648	0.0090016	0.007033	0.00022503	Rank1
RBM33	RNA binding motif protein 33	None	None	nucleotide binding|poly(A) RNA binding|	10.8038	10.4093	10.7395	0.024304	0.28276	0.020737	0.012223	0.063172	0.036261	0.0098125	Rank1
CHEK2	checkpoint kinase 2	chromosome, telomeric region|nucleoplasm|PML body|	DNA damage checkpoint|G2/M transition of mitotic cell cycle|double-strand break repair|transcription, DNA-templated|regulation of transcription, DNA-templated|protein phosphorylation|cellular response to DNA damage stimulus|cellular response to DNA damage stimulus|DNA damage induced protein phosphorylation|intrinsic apoptotic signaling pathway in response to DNA damage|intrinsic apoptotic signali…	protein serine/threonine kinase activity|protein serine/threonine kinase activity|protein binding|ATP binding|protein kinase binding|ubiquitin protein ligase binding|identical protein binding|protein homodimerization activity|metal ion binding|	69.9928	61.5054	55.9801	0.020798	0.035704	0.40917	0.0084038	0.36888	0.0011154	0.0045415	Rank1
ST3GAL2	ST3 beta-galactoside alpha-2,3-sialyltransferase 2	Golgi membrane|extracellular region|integral component of Golgi membrane|Golgi cisterna membrane|	carbohydrate metabolic process|amino sugar metabolic process|cellular protein modification process|O-glycan processing|keratan sulfate biosynthetic process|glycosaminoglycan metabolic process|keratan sulfate metabolic process|post-translational protein modification|cellular protein metabolic process|small molecule metabolic process|sialylation|sialylation|	beta-galactoside (CMP) alpha-2,3-sialyltransferase activity|	2.28401	3.00977	3.61231	0.00064328	0.029416	0.10235	0.0063808	0.52038	0.00054732	0.00067613	Rank1
SERBP1	SERPINE1 mRNA binding protein 1	nucleus|cytoplasm|plasma membrane|membrane|perinuclear region of cytoplasm|extracellular vesicular exosome|	regulation of apoptotic process|regulation of mRNA stability|	mRNA 3'-UTR binding|protein binding|poly(A) RNA binding|	383.185	359.405	394.97	0.0033114	0.0021967	0.20569	0.028272	0.36888	0.0022008	0.0010451	Rank1
LRRC40	leucine rich repeat containing 40	membrane|	None	None	4.19295	4.01171	3.05231	0.00095992	0.028992	0.19785	0.015045	0.1979	0.018645	0.0011267	Rank1
TEX10	testis expressed 10	nucleolus|cytoplasm|integral component of membrane|nuclear membrane|MLL1 complex|	None	protein binding|	21.827	20.8402	17.146	0.00021374	0.1905	3.8748e-05	0.031293	0.007732	0.92961	0.014373	Rank1
PPM1G	protein phosphatase, Mg2+/Mn2+ dependent, 1G	nucleus|cytoplasm|	protein dephosphorylation|cell cycle arrest|peptidyl-threonine dephosphorylation|	protein serine/threonine phosphatase activity|protein binding|metal ion binding|	55.7685	55.75	56.9916	0.20775	0.65042	0.040824	0.0063808	0.0051086	0.021454	0.0080784	Rank2
SNRPA	small nuclear ribonucleoprotein polypeptide A	nucleus|nucleoplasm|spliceosomal complex|U1 snRNP|nucleolus|cytoplasm|	mRNA splicing, via spliceosome|mRNA splicing, via spliceosome|RNA splicing|gene expression|	nucleotide binding|RNA binding|protein binding|snRNA binding|poly(A) RNA binding|	82.0014	78.9901	76.6629	0.081109	0.0081769	0.52982	0.038898	0.030493	0.0020191	0.0023414	Rank2
DNAJC8	DnaJ (Hsp40) homolog, subfamily C, member 8	nucleoplasm|	mRNA splicing, via spliceosome|RNA splicing|gene expression|	None	93.3401	94.3923	97.8016	0.2342	0.022467	0.7525	0.039258	0.02094	0.041324	0.048146	Rank2
BTAF1	BTAF1 RNA polymerase II, B-TFIID transcription factor-associated, 170kDa	nucleus|	metabolic process|negative regulation of chromatin binding|negative regulation of transcription, DNA-templated|	DNA binding|sequence-specific DNA binding transcription factor activity|helicase activity|ATP binding|	6.33944	7.3145	6.63024	0.068387	0.15475	0.013211	0.001604	0.0044994	9.725e-05	0.00044006	Rank2
PTGES3	prostaglandin E synthase 3 (cytosolic)	chromosome, telomeric region|nucleus|telomerase holoenzyme complex|cytoplasm|cytosol|extracellular vesicular exosome|	telomere maintenance|prostaglandin biosynthetic process|RNA-dependent DNA replication|signal transduction|arachidonic acid metabolic process|cyclooxygenase pathway|small molecule metabolic process|chaperone cofactor-dependent protein refolding|	telomerase activity|protein binding|prostaglandin-E synthase activity|unfolded protein binding|	1032.85	932.047	847.908	0.052798	0.3198	0.0067013	0.00099174	0.0044989	0.0011421	6.03e-05	Rank2
WDR62	WD repeat domain 62	spindle pole|nucleus|cytoplasm|	cerebral cortex development|neurogenesis|	None	19.3672	20.4991	24.0252	0.025712	0.9376	0.13315	0.029961	0.016002	0.15236	0.011669	Rank1
RP9	retinitis pigmentosa 9 (autosomal dominant)	nucleus|signal recognition particle receptor complex|	RNA splicing|cognition|	protein binding|zinc ion binding|poly(A) RNA binding|	5.52517	5.11553	5.89071	0.00040003	0.0039924	0.02912	0.23156	0.52038	0.090517	0.0036593	Rank1
TEX264	testis expressed 264	extracellular vesicular exosome|	None	None	44.451	51.8688	56.8863	0.0062376	0.013111	0.019422	0.21632	0.13179	0.7203	0.0024287	Rank1
MSH2	mutS homolog 2	nuclear chromosome|membrane|MutSalpha complex|MutSbeta complex|	meiotic mismatch repair|in utero embryonic development|oxidative phosphorylation|ATP catabolic process|ATP catabolic process|ATP catabolic process|DNA repair|mismatch repair|mismatch repair|postreplication repair|double-strand break repair|meiotic gene conversion|cell cycle arrest|germ cell development|determination of adult lifespan|male gonad development|response to X-ray|response to X-ray|resp…	magnesium ion binding|four-way junction DNA binding|Y-form DNA binding|heteroduplex DNA loop binding|double-strand/single-strand DNA junction binding|DNA binding|double-stranded DNA binding|single-stranded DNA binding|protein binding|protein binding|ATP binding|protein C-terminus binding|DNA-dependent ATPase activity|ATPase activity|centromeric DNA binding|enzyme binding|protein kinase binding|mi…	82.4897	81.0641	71.2556	1.283e-06	1.6679e-05	0.0004252	0.80806	0.57942	0.66326	5.9787e-05	Rank1
CDC42EP1	CDC42 effector protein (Rho GTPase binding) 1	cytoplasm|Golgi apparatus|plasma membrane|actin cytoskeleton|	Rho protein signal transduction|regulation of cell shape|positive regulation of pseudopodium assembly|	protein binding|	14.3414	14.4546	14.658	0.0050747	0.1287	0.0020998	0.0097755	0.10162	0.11013	0.0064562	Rank1
PTPRG	protein tyrosine phosphatase, receptor type, G	extracellular space|integral component of plasma membrane|extracellular vesicular exosome|	transmembrane receptor protein tyrosine kinase signaling pathway|brain development|negative regulation of neuron projection development|peptidyl-tyrosine dephosphorylation|peptidyl-tyrosine dephosphorylation|peptidyl-tyrosine dephosphorylation|	protein tyrosine phosphatase activity|transmembrane receptor protein tyrosine phosphatase activity|protein binding|identical protein binding|	5.27484	6.3631	6.11821	0.020332	0.016143	0.26988	0.087724	0.022863	0.86451	0.011669	Rank1
CYSTM1	cysteine-rich transmembrane module containing 1	integral component of membrane|extracellular vesicular exosome|	biological_process|	molecular_function|	23.7781	22.2185	21.2897	0.0085649	0.0068514	0.0093362	0.76007	0.82312	0.61739	0.035762	Rank1
CCT5	chaperonin containing TCP1, subunit 5 (epsilon)	zona pellucida receptor complex|nucleolus|cytoplasm|centrosome|cytosol|chaperonin-containing T-complex|microtubule|cell body|extracellular vesicular exosome|	protein folding|binding of sperm to zona pellucida|response to virus|cellular protein metabolic process|'de novo' posttranslational protein folding|	ATP binding|G-protein beta-subunit binding|unfolded protein binding|	798.808	758.831	814.014	0.039686	0.82165	0.0017565	0.013435	0.0044989	0.9258	0.83077	Rank3
NCAPD2	non-SMC condensin I complex, subunit D2	nuclear chromosome|condensed chromosome|condensin complex|condensin core heterodimer|nucleus|nucleus|cytoplasm|cytoplasm|cytoplasm|cytosol|membrane|pronucleus|	mitotic cell cycle|mitotic chromosome condensation|mitotic chromosome condensation|	protein binding|histone binding|histone binding|	103.334	113.23	107.291	0.0056454	0.036859	0.013715	0.062439	0.029526	0.52281	0.057215	Rank3
ORC6	origin recognition complex, subunit 6	origin recognition complex|nucleoplasm|nuclear origin of replication recognition complex|membrane|	G1/S transition of mitotic cell cycle|mitotic cell cycle|DNA replication|DNA-dependent DNA replication|	DNA binding|protein binding|	32.461	29.7902	28.7116	1.7962e-06	3.9772e-05	0.0077011	0.11385	0.29806	0.075034	0.039508	Rank1
LRR1	leucine rich repeat protein 1	None	protein ubiquitination|	None	22.7903	23.5395	22.3191	0.018339	0.38329	0.0031411	0.16543	0.43379	0.010132	0.0030276	Rank1
OSBPL1A	oxysterol binding protein-like 1A	intracellular|nucleus|cytoplasm|lysosomal membrane|late endosome|extracellular vesicular exosome|	lipid transport|cholesterol metabolic process|vesicle-mediated transport|antigen processing and presentation of exogenous peptide antigen via MHC class II|	protein binding|phospholipid binding|cholesterol binding|	10.2805	10.193	11.5068	0.037082	0.028558	0.43643	0.059298	0.02094	0.57158	6.03e-05	Rank1
ADSL	adenylosuccinate lyase	mitochondrion|cytosol|	response to hypoxia|purine nucleobase metabolic process|purine nucleotide biosynthetic process|AMP biosynthetic process|'de novo' IMP biosynthetic process|response to nutrient|metabolic process|aerobic respiration|purine ribonucleoside monophosphate biosynthetic process|response to muscle activity|response to starvation|'de novo' AMP biosynthetic process|small molecule metabolic process|protein t…	N6-(1,2-dicarboxyethyl)AMP AMP-lyase (fumarate-forming) activity|N6-(1,2-dicarboxyethyl)AMP AMP-lyase (fumarate-forming) activity|(S)-2-(5-amino-1-(5-phospho-D-ribosyl)imidazole-4-carboxamido)succinate AMP-lyase (fumarate-forming) activity|	442.116	433.077	423.671	0.035906	0.81779	0.042706	0.19429	0.017519	0.93678	0.0070577	Rank1
DUS4L	dihydrouridine synthase 4-like (S. cerevisiae)	None	tRNA dihydrouridine synthesis|oxidation-reduction process|	tRNA dihydrouridine synthase activity|flavin adenine dinucleotide binding|	4.91376	5.43754	4.3953	0.04253	0.16636	0.0055199	0.20642	0.4941	0.022151	0.022986	Rank1
GAPVD1	GTPase activating protein and VPS9 domains 1	endosome|cytosol|membrane|	endocytosis|signal transduction|positive regulation of GTPase activity|positive regulation of GTPase activity|regulation of small GTPase mediated signal transduction|regulation of protein transport|	guanyl-nucleotide exchange factor activity|GTPase activator activity|GTPase activating protein binding|	42.1598	43.8516	39.6166	0.04558	0.1735	0.28337	0.031293	0.015259	0.61206	0.014373	Rank1
CSNK1D	casein kinase 1, delta	nucleus|Golgi apparatus|centrosome|spindle|cytosol|spindle microtubule|plasma membrane|perinuclear region of cytoplasm|	G2/M transition of mitotic cell cycle|mitotic cell cycle|positive regulation of protein phosphorylation|DNA repair|protein phosphorylation|signal transduction|Wnt signaling pathway|positive regulation of proteasomal ubiquitin-dependent protein catabolic process|circadian regulation of gene expression|regulation of circadian rhythm|spindle assembly|positive regulation of canonical Wnt signaling pa…	glycoprotein binding|protein kinase activity|protein kinase activity|protein kinase activity|protein serine/threonine kinase activity|protein binding|ATP binding|peptide binding|tau-protein kinase activity|phosphoprotein binding|	85.6117	90.5142	93.4558	0.016898	0.40293	0.0006931	0.0022732	0.004369	0.4675	0.053268	Rank3
CHMP2A	charged multivesicular body protein 2A	cytosol|membrane|late endosome membrane|extracellular vesicular exosome|	protein transport|viral process|endosomal transport|viral life cycle|establishment of protein localization|regulation of viral process|membrane organization|positive regulation of viral release from host cell|	protein binding|protein domain specific binding|	114.593	122.234	115.981	0.024303	0.098524	0.0037016	0.025956	0.0033463	0.93054	0.29684	Rank3
C1orf112	chromosome 1 open reading frame 112	None	None	None	6.494	6.89504	5.9674	0.019422	0.35299	0.060799	0.012224	0.0090016	0.81442	0.0011262	Rank1
PAXIP1	PAX interacting (with transcription-activation domain) protein 1	nucleus|nuclear matrix|histone methyltransferase complex|	positive regulation of histone H3-K36 methylation|vasculogenesis|DNA repair|DNA recombination|transcription, DNA-templated|response to ionizing radiation|DNA damage response, signal transduction by p53 class mediator|positive regulation of protein ubiquitination|positive regulation of histone acetylation|endothelial cell migration|positive regulation of isotype switching|histone H3-K4 methylation…	protein binding|	8.63436	8.90982	6.9295	0.012272	0.3331	0.068664	0.01788	0.01039	0.22258	0.0045415	Rank1
NR1D2	nuclear receptor subfamily 1, group D, member 2	nucleus|nucleus|nucleoplasm|	regulation of transcription, DNA-templated|transcription initiation from RNA polymerase II promoter|gene expression|regulation of lipid metabolic process|intracellular receptor signaling pathway|regulation of circadian rhythm|steroid hormone mediated signaling pathway|negative regulation of transcription, DNA-templated|positive regulation of transcription, DNA-templated|rhythmic process|regulatio…	core promoter sequence-specific DNA binding|steroid hormone receptor activity|ligand-activated sequence-specific DNA binding RNA polymerase II transcription factor activity|protein binding|zinc ion binding|	24.1139	24.4895	33.0715	0.0050742	0.82544	0.00080293	0.013542	0.084936	0.23026	0.0042659	Rank1
IPO11	importin 11	nucleus|cytoplasm|	ribosomal protein import into nucleus|	Ran GTPase binding|protein transporter activity|	29.6137	28.0669	28.0813	0.012084	0.45907	0.015093	0.1	0.018321	0.93461	0.014373	Rank1
CDK11B	cyclin-dependent kinase 11B	nucleus|cytoplasm|	regulation of cell growth|regulation of transcription, DNA-templated|protein phosphorylation|apoptotic process|mitotic nuclear division|cell proliferation|regulation of mRNA processing|regulation of cell cycle|	protein kinase activity|protein serine/threonine kinase activity|cyclin-dependent protein serine/threonine kinase activity|protein binding|ATP binding|poly(A) RNA binding|	55.3918	59.4337	66.5753	0.0054534	0.29874	0.0095712	0.0057577	0.0090016	0.92768	0.1135	Rank3
PDS5A	PDS5, regulator of cohesion maintenance, homolog A (S. cerevisiae)	chromosome, centromeric region|chromatin|nucleus|nucleoplasm|chromosome|cytosol|plasma membrane|	mitotic cell cycle|mitotic nuclear division|negative regulation of DNA replication|	protein binding|	44.4952	47.3694	43.6722	0.037497	0.1505	0.02262	0.16969	0.45589	0.010131	0.0036598	Rank1
FAM217B	family with sequence similarity 217, member B	None	None	None	2.93322	3.33461	2.86879	0.0089939	0.017892	0.034176	0.40958	0.36888	0.19016	0.0032837	Rank1
MAU2	MAU2 sister chromatid cohesion factor	chromatin|nucleus|nucleoplasm|nucleoplasm|SMC loading complex|SMC loading complex|	mitotic cell cycle|maintenance of mitotic sister chromatid cohesion|	protein binding|protein N-terminus binding|	6.91055	7.98756	7.10223	0.02705	0.038653	0.099444	0.20942	0.42482	0.0028382	0.0039	Rank1
EIF5	eukaryotic translation initiation factor 5	cytoplasm|cytosol|cytosol|plasma membrane|	GTP catabolic process|translation|translational initiation|translational initiation|regulation of translational initiation|gene expression|cellular protein metabolic process|	translation initiation factor activity|GTPase activity|GTP binding|translation factor activity, nucleic acid binding|poly(A) RNA binding|	144.62	160.145	165.944	0.00076388	0.0062206	0.040185	0.20362	0.11751	0.078433	0.0024282	Rank1
FLNC	filamin C, gamma	cytoplasm|cytosol|cytoskeleton|plasma membrane|sarcoplasm|Z disc|sarcolemma|costamere|	cell junction assembly|muscle fiber development|	actin binding|protein binding|cytoskeletal protein binding|ankyrin binding|	4.87397	5.09275	5.53227	0.0012134	0.029416	0.0070642	0.69529	0.48998	0.55833	0.0028305	Rank1
UQCRB	ubiquinol-cytochrome c reductase binding protein	mitochondrial inner membrane|mitochondrial respiratory chain|mitochondrial respiratory chain complex III|	oxidative phosphorylation|mitochondrial electron transport, ubiquinol to cytochrome c|aerobic respiration|respiratory electron transport chain|cellular metabolic process|small molecule metabolic process|oxidation-reduction process|	None	332.893	326.481	290.259	0.01105	0.0033114	0.035261	0.9051	0.41552	0.9258	0.0070577	Rank1
ABCE1	ATP-binding cassette, sub-family E (OABP), member 1	cytoplasm|mitochondrion|membrane|	ATP catabolic process|RNA catabolic process|response to virus|viral process|negative regulation of catalytic activity|	ATP binding|ribonuclease inhibitor activity|ATPase activity|iron-sulfur cluster binding|	158.372	149.183	138.033	0.0089939	0.0024153	0.70841	0.078359	0.42022	9.494e-06	0.0030271	Rank1
RPLP0	ribosomal protein, large, P0	nucleus|cytoplasm|cytosol|membrane|cytosolic large ribosomal subunit|ribonucleoprotein complex|cytoplasmic ribonucleoprotein granule|extracellular vesicular exosome|	nuclear-transcribed mRNA catabolic process, nonsense-mediated decay|translation|translation|translational initiation|translational elongation|translational termination|SRP-dependent cotranslational protein targeting to membrane|gene expression|viral process|RNA metabolic process|mRNA metabolic process|viral life cycle|viral transcription|ribosome biogenesis|cellular protein metabolic process|	RNA binding|structural constituent of ribosome|protein binding|poly(A) RNA binding|	11407.1	11846.1	11376	0.0024605	0.015849	0.030189	0.086271	0.10003	0.011185	0.058227	Rank3
CHD4	chromodomain helicase DNA binding protein 4	nuclear chromatin|nucleus|nucleoplasm|cytoplasm|centrosome|membrane|NuRD complex|protein complex|	ATP catabolic process|transcription, DNA-templated|regulation of transcription from RNA polymerase II promoter|DNA duplex unwinding|ATP-dependent chromatin remodeling|spindle assembly|	RNA polymerase II core promoter proximal region sequence-specific DNA binding|RNA polymerase II distal enhancer sequence-specific DNA binding|RNA polymerase II repressing transcription factor binding|DNA binding|ATP-dependent DNA helicase activity|protein binding|ATP binding|microtubule binding|zinc ion binding|nucleosomal DNA binding|	756.98	872.254	893.677	0.0054534	0.028992	1.36e-05	0.89142	0.41105	0.92484	0.010253	Rank1
RBBP4	retinoblastoma binding protein 4	nuclear chromatin|nucleus|nucleoplasm|nucleoplasm|Sin3 complex|NuRD complex|NuRD complex|NURF complex|CAF-1 complex|ESC/E(Z) complex|protein complex|	G2/M transition of mitotic cell cycle|mitotic cell cycle|ATP catabolic process|DNA replication|nucleosome assembly|DNA replication-dependent nucleosome assembly|DNA replication-independent nucleosome assembly|chromatin remodeling|transcription, DNA-templated|regulation of transcription, DNA-templated|negative regulation of cell proliferation|chromatin assembly|centromere-specific nucleosome assem…	RNA polymerase II core promoter proximal region sequence-specific DNA binding|RNA polymerase II distal enhancer sequence-specific DNA binding|protein binding|DNA-dependent ATPase activity|nucleosomal DNA binding|histone binding|histone deacetylase binding|	320.644	330.011	362.516	0.031808	0.0078803	0.76699	0.015045	0.0090021	0.93678	0.82344	Rank3
CHAF1B	chromatin assembly factor 1, subunit B (p60)	nuclear chromatin|nucleus|nucleus|nucleoplasm|cytoplasm|cytosol|CAF-1 complex|protein complex|	DNA replication|DNA repair|DNA replication-dependent nucleosome assembly|transcription, DNA-templated|regulation of transcription, DNA-templated|protein complex assembly|cell cycle|chromatin assembly|	chromatin binding|histone binding|unfolded protein binding|	5.3783	5.15024	5.1842	0.0033109	0.0081769	0.0032848	0.62309	0.43379	0.4915	0.022986	Rank1
TAF11	TAF11 RNA polymerase II, TATA box binding protein (TBP)-associated factor, 28kDa	nucleus|nucleoplasm|transcription factor TFIID complex|Golgi apparatus|	regulation of transcription, DNA-templated|transcription from RNA polymerase II promoter|transcription from RNA polymerase II promoter|transcription initiation from RNA polymerase II promoter|transcription initiation from RNA polymerase II promoter|transcription elongation from RNA polymerase II promoter|gene expression|viral process|positive regulation by host of viral transcription|	DNA binding|transcription coactivator activity|protein binding|vitamin D receptor binding|thyroid hormone receptor binding|protein heterodimerization activity|protein N-terminus binding|	10.074	11.2769	11.2543	0.02705	0.81393	0.1089	0.030325	0.11286	0.0017174	0.00086652	Rank1
ATAT1	alpha tubulin acetyltransferase 1	cytoplasm|spindle|coated pit|focal adhesion|axon|	neuron development|regulation of microtubule cytoskeleton organization|alpha-tubulin acetylation|	tubulin N-acetyltransferase activity|	3.62588	4.10073	4.13245	0.0097345	0.022467	0.095737	0.062438	0.62772	0.0063007	0.0068493	Rank1
MUS81	MUS81 structure-specific endonuclease subunit	nucleus|intercellular bridge|	DNA catabolic process, endonucleolytic|DNA repair|DNA recombination|response to intra-S DNA damage checkpoint signaling|	DNA binding|protein binding|metal ion binding|3'-flap endonuclease activity|	7.46862	8.82188	8.1504	0.002461	0.014152	0.027019	0.17198	0.11286	0.73058	0.0068488	Rank1
GTF2H3	general transcription factor IIH, polypeptide 3, 34kDa	core TFIIH complex|nucleoplasm|holo TFIIH complex|	nucleotide-excision repair, DNA damage removal|ATP catabolic process|DNA repair|transcription-coupled nucleotide-excision repair|nucleotide-excision repair|regulation of transcription, DNA-templated|transcription from RNA polymerase I promoter|transcription initiation from RNA polymerase I promoter|transcription elongation from RNA polymerase I promoter|termination of RNA polymerase I transcripti…	damaged DNA binding|sequence-specific DNA binding transcription factor activity|protein kinase activity|DNA-dependent ATPase activity|translation factor activity, nucleic acid binding|RNA polymerase II carboxy-terminal domain kinase activity|metal ion binding|protein N-terminus binding|	139.045	110.711	113.253	0.0092726	0.0054278	0.24173	0.21487	0.47318	0.034607	0.0017656	Rank1
MPHOSPH8	M-phase phosphoprotein 8	nuclear nucleosome|nucleus|nuclear heterochromatin|nucleolus|cytoplasm|plasma membrane|extracellular vesicular exosome|	transcription, DNA-templated|cell cycle|regulation of DNA methylation|negative regulation of transcription, DNA-templated|	protein binding|methylated histone binding|	11.5401	11.8849	11.3452	0.026008	0.013111	0.088044	0.059747	0.54202	0.0022008	0.015227	Rank1
NUP107	nucleoporin 107kDa	kinetochore|condensed chromosome kinetochore|nucleus|nuclear envelope|nuclear pore|centrosome|cytosol|membrane|nuclear pore outer ring|nuclear pore outer ring|nuclear membrane|nuclear periphery|	mitotic cell cycle|carbohydrate metabolic process|mRNA export from nucleus|mitotic nuclear envelope disassembly|hexose transport|regulation of glucose transport|protein transport|glucose transport|viral process|cytokine-mediated signaling pathway|small molecule metabolic process|nuclear pore complex assembly|transmembrane transport|	nucleocytoplasmic transporter activity|protein binding|structural constituent of nuclear pore|	85.1292	80.7642	79.1876	0.0033109	0.026488	0.17989	0.03963	0.12224	0.10751	0.00058632	Rank1
PPP2R5D	protein phosphatase 2, regulatory subunit B', delta	protein phosphatase type 2A complex|nucleus|nucleoplasm|cytosol|	toll-like receptor signaling pathway|MyD88-dependent toll-like receptor signaling pathway|MyD88-independent toll-like receptor signaling pathway|carbohydrate metabolic process|glucose metabolic process|glycolytic process|energy reserve metabolic process|nervous system development|dephosphorylation|toll-like receptor 2 signaling pathway|toll-like receptor 3 signaling pathway|toll-like receptor 4 s…	protein serine/threonine phosphatase activity|protein binding|protein phosphatase type 2A regulator activity|	38.1065	44.0574	42.9627	0.0030065	0.043274	0.0011093	0.70639	0.47318	0.52281	0.0039005	Rank1
RPIA	ribose 5-phosphate isomerase A	cytosol|intracellular membrane-bounded organelle|	carbohydrate metabolic process|pentose-phosphate shunt|pentose-phosphate shunt, non-oxidative branch|ribose phosphate metabolic process|small molecule metabolic process|	ribose-5-phosphate isomerase activity|monosaccharide binding|	11.9933	10.9977	12.9859	0.013327	0.056896	0.0011971	0.0055684	0.0047919	0.93331	0.1261	Rank3
SGF29	coiled-coil domain containing 101	Ada2/Gcn5/Ada3 transcription activator complex|SAGA-type complex|	chromatin organization|transcription, DNA-templated|regulation of transcription, DNA-templated|histone H3 acetylation|establishment of protein localization to chromatin|	protein binding|methylated histone binding|	5.81227	5.41509	6.60774	0.005941	0.15475	0.0097006	0.051869	0.36417	0.0082714	0.00067664	Rank1
TMEM183B	NA	NA	NA	NA	4.76237	5.16478	6.11453	0.011643	0.010822	0.11292	0.68703	0.44278	0.015753	0.0091653	Rank1
UBA2	ubiquitin-like modifier activating enzyme 2	nucleoplasm|cytosol|SUMO activating enzyme complex|	protein sumoylation|protein sumoylation|protein sumoylation|SMT3-dependent protein catabolic process|positive regulation of catalytic activity|post-translational protein modification|cellular protein metabolic process|	protein binding|ATP binding|enzyme activator activity|transcription factor binding|ligase activity|SUMO activating enzyme activity|SUMO activating enzyme activity|metal ion binding|protein heterodimerization activity|	81.0027	76.3471	72.1927	0.046644	0.038652	0.048301	0.28529	0.41105	0.022843	0.82344	Rank3
SURF6	surfeit 6	granular component|nucleoplasm|nucleolus|	ribosome biogenesis|	DNA binding|RNA binding|poly(A) RNA binding|	11.243	10.9638	12.5226	0.00023632	0.49273	0.00023736	0.050748	0.010389	0.95553	0.0070571	Rank1
MRPS18C	mitochondrial ribosomal protein S18C	mitochondrial small ribosomal subunit|	translation|	structural constituent of ribosome|	29.0027	26.5496	24.897	0.00041799	0.014152	0.0067013	0.67316	0.48998	0.46427	0.0068493	Rank1
ZBTB11	zinc finger and BTB domain containing 11	nucleus|	transcription, DNA-templated|regulation of transcription, DNA-templated|biological_process|	molecular_function|DNA binding|metal ion binding|	3.87043	4.16918	3.90888	0.0054529	0.043274	0.012435	0.52039	0.43379	0.41337	0.017091	Rank1
BCAT2	branched chain amino-acid transaminase 2, mitochondrial	mitochondrion|mitochondrial matrix|	isoleucine catabolic process|leucine metabolic process|valine metabolic process|branched-chain amino acid biosynthetic process|branched-chain amino acid catabolic process|regulation of hormone levels|cellular nitrogen compound metabolic process|small molecule metabolic process|	branched-chain-amino-acid transaminase activity|L-leucine transaminase activity|L-valine transaminase activity|L-isoleucine transaminase activity|	49.0037	49.3581	52.1264	0.002461	0.010339	0.023549	0.47327	0.31217	0.94807	0.0048566	Rank1
EIF3E	eukaryotic translation initiation factor 3, subunit E	chromatin|nucleus|nucleoplasm|cytoplasm|cytosol|eukaryotic translation initiation factor 3 complex|eukaryotic translation initiation factor 3 complex|membrane|eukaryotic 43S preinitiation complex|PML body|eukaryotic 48S preinitiation complex|extracellular vesicular exosome|	nuclear-transcribed mRNA catabolic process, nonsense-mediated decay|formation of translation preinitiation complex|translation|translational initiation|translational initiation|translational initiation|regulation of translational initiation|gene expression|cellular protein metabolic process|negative regulation of translational initiation|	translation initiation factor activity|translation initiation factor activity|translation initiation factor activity|protein binding|poly(A) RNA binding|protein N-terminus binding|	5271.13	4931.79	3958.72	0.0033109	0.016143	0.057701	0.030325	0.1979	0.0011154	0.05427	Rank3
FAM98B	family with sequence similarity 98, member B	tRNA-splicing ligase complex|	None	poly(A) RNA binding|	33.9671	35.1665	31.5305	0.00067048	0.0039924	0.036655	0.64805	0.41105	0.29791	0.039509	Rank1
GTF3C6	general transcription factor IIIC, polypeptide 6, alpha 35kDa	transcription factor TFIIIC complex|	transcription, DNA-templated|transcription from RNA polymerase III promoter|5S class rRNA transcription from RNA polymerase III type 1 promoter|tRNA transcription from RNA polymerase III promoter|	DNA binding|protein binding|	25.0952	25.3455	24.6668	0.00015011	7.4413e-06	0.00024711	0.051869	0.41105	0.03045	0.05427	Rank3
DOHH	deoxyhypusine hydroxylase/monooxygenase	cellular_component|cytosol|	peptidyl-lysine modification to peptidyl-hypusine|peptidyl-lysine modification to peptidyl-hypusine|post-translational protein modification|cellular protein metabolic process|oxidation-reduction process|	protein binding|deoxyhypusine monooxygenase activity|deoxyhypusine monooxygenase activity|metal ion binding|	8.64629	8.67927	12.5796	0.011794	0.043274	0.02562	0.28529	0.46679	0.074445	0.0070571	Rank1
RPS18	ribosomal protein S18	nucleus|cytosol|cytosol|ribosome|small ribosomal subunit|small ribosomal subunit|membrane|cytosolic small ribosomal subunit|extracellular vesicular exosome|	nuclear-transcribed mRNA catabolic process, nonsense-mediated decay|translation|translation|translation|translational initiation|translational elongation|translational termination|SRP-dependent cotranslational protein targeting to membrane|gene expression|viral process|RNA metabolic process|mRNA metabolic process|viral life cycle|viral transcription|ribosome biogenesis|cellular protein metabolic …	structural constituent of ribosome|protein binding|rRNA binding|poly(A) RNA binding|	5141.52	4999.43	4991.52	0.0056448	0.80785	0.00043187	0.061688	0.0019873	0.013316	0.1135	Rank3
AAMP	angio-associated, migratory cell protein	cytoplasm|plasma membrane|cell surface|	angiogenesis|positive regulation of endothelial cell migration|smooth muscle cell migration|cell differentiation|	heparin binding|	164.701	178.63	190.178	0.01611	0.20108	0.0098335	0.16543	0.42482	0.012882	0.011669	Rank1
XPO7	exportin 7	nucleus|nuclear pore|cytoplasm|	protein export from nucleus|mRNA transport|	nuclear export signal receptor activity|Ran GTPase binding|	17.4315	16.8888	16.0586	0.016301	0.026088	0.037323	0.12036	0.18848	0.1384	0.0042654	Rank1
VHL	von Hippel-Lindau tumor suppressor, E3 ubiquitin protein ligase	nucleus|nucleoplasm|mitochondrion|endoplasmic reticulum|cytosol|membrane|intermediate filament cytoskeleton|	negative regulation of transcription from RNA polymerase II promoter|cell morphogenesis|regulation of transcription, DNA-templated|proteolysis|response to stress|negative regulation of cell proliferation|protein ubiquitination|protein ubiquitination|negative regulation of apoptotic process|positive regulation of cell differentiation|positive regulation of transcription, DNA-templated|protein stab…	ubiquitin-protein transferase activity|protein binding|transcription factor binding|enzyme binding|	10.1226	11.5993	10.235	0.010625	0.0039929	0.35906	0.060469	0.46031	0.0018	0.0024282	Rank1
CRNKL1	crooked neck pre-mRNA splicing factor 1	spliceosomal complex|cytoplasm|nuclear speck|catalytic step 2 spliceosome|	spliceosomal complex assembly|mRNA splicing, via spliceosome|	RNA binding|protein binding|poly(A) RNA binding|	34.7453	34.5011	34.1825	0.02705	0.1139	0.00066641	0.0022311	0.0062489	0.93678	0.82344	Rank3
RPS6	ribosomal protein S6	nucleus|nucleolus|cytoplasm|cytosol|small ribosomal subunit|membrane|cytosolic small ribosomal subunit|cytosolic small ribosomal subunit|dendrite|ribonucleoprotein complex|cytoplasmic ribonucleoprotein granule|cell body|	nuclear-transcribed mRNA catabolic process, nonsense-mediated decay|rRNA processing|translation|translation|translational initiation|translational elongation|translational termination|SRP-dependent cotranslational protein targeting to membrane|insulin receptor signaling pathway|gene expression|viral process|RNA metabolic process|mRNA metabolic process|viral life cycle|viral transcription|TOR sign…	structural constituent of ribosome|protein binding|protein kinase binding|poly(A) RNA binding|	1855.34	1865.74	2054.36	7.6979e-07	0.0014038	0.00077727	0.89778	0.41105	0.93241	0.040205	Rank1
SURF1	surfeit 1	mitochondrial respiratory chain|integral component of membrane|	oxidative phosphorylation|ATP biosynthetic process|respiratory chain complex IV assembly|aerobic respiration|oxidation-reduction process|hydrogen ion transmembrane transport|hydrogen ion transmembrane transport|	cytochrome-c oxidase activity|protein binding|	34.191	37.1646	37.8149	0.037497	0.090769	0.21886	0.012571	0.0099141	0.93331	0.007849	Rank1
TPX2	TPX2, microtubule-associated	spindle pole|nucleus|cytoplasm|spindle|microtubule|microtubule cytoskeleton|	apoptotic process|mitotic nuclear division|cell proliferation|activation of protein kinase activity|regulation of mitotic spindle organization|	protein binding|ATP binding|GTP binding|protein kinase binding|	69.0384	65.3347	62.3999	0.011643	0.0093424	0.055785	0.22163	0.015259	0.92961	0.00283	Rank1
DUT	deoxyuridine triphosphatase	nucleus|nucleoplasm|mitochondrion|extracellular vesicular exosome|	nucleobase-containing compound metabolic process|pyrimidine nucleobase metabolic process|dUMP biosynthetic process|DNA replication|small molecule metabolic process|dUTP metabolic process|pyrimidine nucleoside biosynthetic process|nucleobase-containing small molecule metabolic process|	dUTP diphosphatase activity|protein binding|poly(A) RNA binding|	80.0265	76.1792	78.4572	4.3365e-05	0.0036111	7.262e-05	0.92564	0.44278	0.92961	0.036927	Rank1
JAGN1	jagunal homolog 1 (Drosophila)	endoplasmic reticulum membrane|integral component of membrane|	endoplasmic reticulum organization|	None	10.805	11.2595	10.3114	0.02317	0.24756	0.22604	0.0018744	0.0026786	0.57984	0.0018898	Rank1
WBP4	WW domain binding protein 4	nucleus|spliceosomal complex|plasma membrane|nuclear speck|	mRNA cis splicing, via spliceosome|	nucleic acid binding|protein binding|zinc ion binding|proline-rich region binding|	5.53932	6.03991	5.53724	0.020332	0.023229	0.37682	0.012862	0.022862	0.70466	0.06982	Rank3
TAF10	TAF10 RNA polymerase II, TATA box binding protein (TBP)-associated factor, 30kDa	PCAF complex|nucleus|nucleoplasm|transcription factor TFIID complex|cytoplasm|STAGA complex|transcription factor TFTC complex|perinuclear region of cytoplasm|	chromatin organization|DNA-templated transcription, initiation|regulation of transcription, DNA-templated|transcription from RNA polymerase II promoter|transcription from RNA polymerase II promoter|transcription initiation from RNA polymerase II promoter|transcription initiation from RNA polymerase II promoter|transcription initiation from RNA polymerase II promoter|transcription elongation from …	sequence-specific DNA binding transcription factor activity|transcription coactivator activity|histone acetyltransferase activity|protein binding|protein binding|enzyme binding|estrogen receptor binding|RNA polymerase binding|	9.08255	9.23021	10.2735	0.039686	0.42242	0.2077	0.0074923	0.01676	0.3647	0.040205	Rank1
GMPS	guanine monphosphate synthase	cytoplasm|cytosol|	purine nucleobase metabolic process|GMP biosynthetic process|glutamine metabolic process|purine nucleobase biosynthetic process|purine ribonucleoside monophosphate biosynthetic process|small molecule metabolic process|nucleobase-containing small molecule metabolic process|	GMP synthase activity|GMP synthase (glutamine-hydrolyzing) activity|ATP binding|pyrophosphatase activity|	39.5756	38.7644	35.7749	0.00023632	3.3357e-06	0.012478	0.42907	0.41552	0.10131	0.0068493	Rank1
LAS1L	LAS1-like (S. cerevisiae)	nucleus|cytoplasm|microtubule organizing center|membrane|MLL1 complex|	rRNA processing|	poly(A) RNA binding|	142.721	136.532	134.465	0.02293	0.16033	0.010575	0.06463	0.0109	0.93241	0.0022521	Rank1
TPRKB	TP53RK binding protein	nucleus|cytoplasm|cytosol|	tRNA processing|	protein binding|protein kinase binding|	70.8423	60.3325	49.1296	0.010625	0.043274	0.084881	0.076432	0.022863	0.012388	0.052325	Rank3
RPL18	ribosomal protein L18	nucleus|nucleolus|cytoplasm|cytosol|membrane|cytosolic large ribosomal subunit|	nuclear-transcribed mRNA catabolic process, nonsense-mediated decay|translation|translation|translational initiation|translational elongation|translational termination|SRP-dependent cotranslational protein targeting to membrane|gene expression|viral process|RNA metabolic process|mRNA metabolic process|viral life cycle|viral transcription|cellular protein metabolic process|	RNA binding|structural constituent of ribosome|	1582.53	1664.26	1463.38	0.0004611	0.00061506	0.66369	0.16083	0.41105	0.00044725	0.004541	Rank1
CDC73	cell division cycle 73	nucleus|Cdc73/Paf1 complex|	negative regulation of transcription from RNA polymerase II promoter|endodermal cell fate commitment|transcription, DNA-templated|mRNA polyadenylation|cell cycle|negative regulation of cell proliferation|histone monoubiquitination|Wnt signaling pathway|stem cell maintenance|positive regulation of Wnt signaling pathway|positive regulation of mRNA 3'-end processing|protein destabilization|positive …	RNA polymerase II core binding|protein binding|	58.2574	61.9436	56.9896	0.04558	0.010619	0.13151	0.24546	0.47742	0.019038	0.047386	Rank1
HSPE1	NA	NA	NA	NA	1114.65	842.942	834.652	0.00011675	0.00023119	0.0060927	0.20942	0.05981	0.92961	0.0029301	Rank1
ATP6V0B	ATPase, H+ transporting, lysosomal 21kDa, V0 subunit b	vacuolar membrane|endosome membrane|integral component of membrane|phagocytic vesicle membrane|proton-transporting V-type ATPase, V0 domain|	cellular iron ion homeostasis|insulin receptor signaling pathway|ATP hydrolysis coupled proton transport|proton transport|transferrin transport|interaction with host|transmembrane transport|phagosome maturation|	transporter activity|hydrogen ion transmembrane transporter activity|	64.8164	70.672	69.7917	0.023415	0.023229	0.003079	0.46495	0.41552	0.046844	0.14726	Rank3
ERLIN2	ER lipid raft associated 2	endoplasmic reticulum|endoplasmic reticulum membrane|integral component of membrane|protein complex|extracellular vesicular exosome|	cell death|ER-associated ubiquitin-dependent protein catabolic process|	protein binding|	8.80908	9.12399	9.02348	0.00016448	0.0040683	0.0087557	0.07979	0.12224	0.14343	2.0271e-05	Rank1
TMEM183A	transmembrane protein 183A	integral component of membrane|	None	None	23.0318	24.7841	29.5708	0.002461	0.0044902	0.013885	0.20942	0.12224	0.85788	0.004541	Rank1
EFNA3	ephrin-A3	plasma membrane|integral component of plasma membrane|anchored component of membrane|	cell-cell signaling|axon guidance|ephrin receptor signaling pathway|ephrin receptor signaling pathway|	transmembrane-ephrin receptor activity|ephrin receptor binding|	3.23849	3.68026	4.34293	0.039686	0.0054272	0.43902	0.16196	0.56092	0.0082714	0.0042654	Rank1
FBXW5	F-box and WD repeat domain containing 5	cytoplasm|SCF ubiquitin ligase complex|Cul4-RING E3 ubiquitin ligase complex|	mitotic nuclear division|protein ubiquitination|protein ubiquitination|SCF-dependent proteasomal ubiquitin-dependent protein catabolic process|proteasome-mediated ubiquitin-dependent protein catabolic process|centrosome duplication|	protein binding|protein kinase binding|	17.6455	21.2239	23.4862	0.030798	0.044635	0.39924	0.048772	0.073249	0.4915	0.01469	Rank1
FXR2	fragile X mental retardation, autosomal homolog 2	cytoplasm|membrane|cytosolic large ribosomal subunit|extracellular vesicular exosome|	None	RNA binding|protein binding|identical protein binding|poly(A) RNA binding|	9.87177	10.6779	10.7438	0.030464	0.058459	0.10052	0.012862	0.0035546	0.9079	0.00086601	Rank1
SEC23B	Sec23 homolog B (S. cerevisiae)	Golgi membrane|endoplasmic reticulum membrane|endomembrane system|membrane|COPII vesicle coat|endoplasmic reticulum-Golgi intermediate compartment membrane|intracellular membrane-bounded organelle|perinuclear region of cytoplasm|	intracellular protein transport|ER to Golgi vesicle-mediated transport|vesicle-mediated transport|	zinc ion binding|	71.8591	77.2633	77.1876	0.02317	0.029416	0.035812	0.1243	0.47318	0.12767	0.01469	Rank1
NDUFS7	NADH dehydrogenase (ubiquinone) Fe-S protein 7, 20kDa (NADH-coenzyme Q reductase)	mitochondrial inner membrane|mitochondrial respiratory chain complex I|mitochondrial respiratory chain complex I|mitochondrial respiratory chain complex I|neuron projection|neuronal cell body|synaptic membrane|	mitochondrial electron transport, NADH to ubiquinone|respiratory electron transport chain|mitochondrial respiratory chain complex I assembly|cellular metabolic process|small molecule metabolic process|	protease binding|NADH dehydrogenase activity|protein binding|NADH dehydrogenase (ubiquinone) activity|oxidoreductase activity, acting on NAD(P)H, quinone or similar compound as acceptor|metal ion binding|quinone binding|4 iron, 4 sulfur cluster binding|	79.62	71.6371	89.4795	0.019423	0.016143	0.42163	0.0074923	0.0090016	0.42459	0.056222	Rank3
RBM48	RNA binding motif protein 48	nucleus|	None	RNA binding|	2.77071	3.54644	3.45825	0.00024761	0.013111	0.055785	0.062439	0.45589	0.007033	0.0024282	Rank1
DENND3	DENN/MADD domain containing 3	None	endosome to lysosome transport|positive regulation of Rab GTPase activity|positive regulation of Rab GTPase activity|cellular protein catabolic process|	Rab guanyl-nucleotide exchange factor activity|	2.40162	2.69382	2.5778	0.012272	0.5574	0.0095805	0.039258	0.022862	0.8816	0.11033	Rank3
SSBP4	single stranded DNA binding protein 4	nucleus|	None	single-stranded DNA binding|	34.8943	31.3765	36.4821	0.012084	0.03399	0.0026115	0.60368	0.48998	0.59108	0.0083083	Rank1
HOXB7	homeobox B7	nucleus|nucleus|cytoplasm|	transcription, DNA-templated|regulation of transcription, DNA-templated|multicellular organismal development|anterior/posterior pattern specification|myeloid cell differentiation|embryonic skeletal system morphogenesis|positive regulation of branching involved in ureteric bud morphogenesis|	sequence-specific DNA binding transcription factor activity|protein binding|sequence-specific DNA binding|	10.3363	11.7703	13.4757	0.0098468	0.029416	0.01718	0.061688	0.073248	0.3406	0.0013633	Rank1
OSMR	oncostatin M receptor	oncostatin-M receptor complex|	positive regulation of acute inflammatory response|cell surface receptor signaling pathway|cell proliferation|positive regulation of cell proliferation|response to cytokine|oncostatin-M-mediated signaling pathway|oncostatin-M-mediated signaling pathway|	oncostatin-M receptor activity|growth factor binding|	5.97448	7.57185	6.56318	0.0056448	0.0055171	0.56575	0.42907	0.26471	0.032411	0.011935	Rank1
BARD1	BRCA1 associated RING domain 1	ubiquitin ligase complex|nucleus|nucleus|nucleolus|cytoplasm|BRCA1-BARD1 complex|intracellular membrane-bounded organelle|BRCA1-A complex|	tissue homeostasis|DNA repair|cellular response to DNA damage stimulus|cell cycle arrest|protein ubiquitination|negative regulation of mRNA 3'-end processing|regulation of phosphorylation|positive regulation of apoptotic process|negative regulation of apoptotic process|positive regulation of protein catabolic process|negative regulation of protein export from nucleus|protein K6-linked ubiquitinat…	RNA binding|ubiquitin-protein transferase activity|ubiquitin-protein transferase activity|protein binding|zinc ion binding|ligase activity|kinase binding|protein homodimerization activity|protein heterodimerization activity|	15.3888	17.1683	14.2825	0.00047598	0.3553	1.2061e-05	0.091868	0.040206	0.12832	0.038161	Rank1
SHKBP1	SH3KBP1 binding protein 1	None	protein homooligomerization|	None	52.5195	63.3354	68.1054	0.0016425	0.049585	0.0033582	0.10576	0.19315	0.091232	0.00067664	Rank1
CD83	CD83 molecule	plasma membrane|integral component of plasma membrane|external side of plasma membrane|	defense response|humoral immune response|signal transduction|response to organic cyclic compound|negative regulation of interleukin-4 production|positive regulation of interleukin-10 production|positive regulation of interleukin-2 production|positive regulation of CD4-positive, alpha-beta T cell differentiation|	None	2.57287	2.87574	2.48863	0.0011457	0.026488	0.17989	0.038287	0.37355	0.10428	0.0023409	Rank1
FAT1	FAT atypical cadherin 1	nucleus|plasma membrane|integral component of plasma membrane|cell-cell junction|lamellipodium|filopodium|perinuclear region of cytoplasm|extracellular vesicular exosome|	actin filament organization|cell adhesion|homophilic cell adhesion|establishment or maintenance of cell polarity|cell-cell signaling|anatomical structure morphogenesis|single organismal cell-cell adhesion|cell migration|	calcium ion binding|protein binding|	76.8383	85.5843	103.331	2.3863e-05	0.049585	0.015435	0.091868	0.12224	0.76886	0.010954	Rank1
FUT8	fucosyltransferase 8 (alpha (1,6) fucosyltransferase)	Golgi membrane|cytoplasm|Golgi apparatus|membrane|integral component of membrane|Golgi cisterna membrane|extracellular vesicular exosome|	in utero embryonic development|protein N-linked glycosylation|N-glycan processing|transforming growth factor beta receptor signaling pathway|integrin-mediated signaling pathway|respiratory gaseous exchange|oligosaccharide biosynthetic process|cell migration|protein N-linked glycosylation via asparagine|protein N-linked glycosylation via asparagine|protein glycosylation in Golgi|N-glycan fucosylat…	glycoprotein 6-alpha-L-fucosyltransferase activity|glycoprotein 6-alpha-L-fucosyltransferase activity|SH3 domain binding|	21.675	29.8282	26.0348	0.0010708	0.049585	0.015627	0.08066	0.060932	0.56701	0.00086601	Rank1
MIS18A	MIS18 kinetochore protein A	chromosome, centromeric region|nucleus|nucleoplasm|cytoplasm|	nucleosome assembly|chromosome segregation|mitotic nuclear division|biological_process|centromere-specific nucleosome assembly|regulation of DNA methylation|	molecular_function|	10.2703	10.912	11.0973	6.0813e-05	0.0020186	0.0013439	0.56214	0.4559	0.43284	0.014689	Rank1
EIF2AK1	eukaryotic translation initiation factor 2-alpha kinase 1	cytoplasm|	response to stress|negative regulation of cell proliferation|response to external stimulus|regulation of eIF2 alpha phosphorylation by heme|negative regulation of translational initiation by iron|protoporphyrinogen IX metabolic process|protein autophosphorylation|negative regulation of hemoglobin biosynthetic process|	eukaryotic translation initiation factor 2alpha kinase activity|ATP binding|heme binding|protein homodimerization activity|	81.3857	83.6426	84.3692	0.00036103	0.0034525	0.089533	0.55377	0.48998	0.01185	0.00026609	Rank1
EDF1	endothelial differentiation-related factor 1	intracellular|nucleus|nucleus|nucleus|transcription factor TFIID complex|nucleolus|cytoplasm|cytoplasm|extracellular vesicular exosome|	transcription, DNA-templated|regulation of transcription, DNA-templated|multicellular organismal development|regulation of lipid metabolic process|positive regulation of DNA binding|endothelial cell differentiation|positive regulation of transcription, DNA-templated|	transcription coactivator activity|protein binding|calmodulin binding|sequence-specific DNA binding|poly(A) RNA binding|	127.246	133.494	126.789	0.00030509	0.058459	0.030983	0.24384	0.46031	0.037613	0.00050216	Rank1
COX16	COX16 cytochrome c oxidase assembly homolog (S. cerevisiae)	cellular_component|integral component of membrane|mitochondrial membrane|	biological_process|	molecular_function|	17.7603	17.9753	14.9835	0.00015011	0.0078803	0.0041404	0.7145	0.43379	0.71051	0.048937	Rank1
NUBP2	nucleotide binding protein 2	nucleus|cytoplasm|spindle pole centrosome|	iron-sulfur cluster assembly|small molecule metabolic process|	nucleotide binding|protein binding|ATP binding|metal ion binding|4 iron, 4 sulfur cluster binding|	70.4223	69.5773	90.5003	7.6979e-07	0.00052268	0.00048217	0.774	0.43379	0.63059	0.0064562	Rank1
DRAP1	DR1-associated protein 1 (negative cofactor 2 alpha)	nucleus|	negative regulation of transcription from RNA polymerase II promoter|transcription, DNA-templated|	DNA binding|sequence-specific DNA binding transcription factor activity|transcription corepressor activity|protein binding|transcription factor binding|sequence-specific DNA binding|protein heterodimerization activity|	117.833	122.54	149.371	0.24456	0.06339	0.66371	0.012571	0.016761	0.033349	0.0036598	Rank2
PDIK1L	PDLIM1 interacting kinase 1 like	nucleus|	protein phosphorylation|	protein serine/threonine kinase activity|ATP binding|	4.15334	4.13323	4.13568	0.32744	0.87043	0.027809	0.015787	0.0094425	0.15409	0.048146	Rank2
SLC16A5	solute carrier family 16 (monocarboxylate transporter), member 5	integral component of plasma membrane|membrane|	monocarboxylic acid transport|transmembrane transport|	monocarboxylic acid transmembrane transporter activity|symporter activity|secondary active monocarboxylate transmembrane transporter activity|	6.88914	8.23879	6.17525	0.86422	0.86893	0.7525	0.0024297	0.0094419	0.0019766	0.0068488	Rank2
LDHB	lactate dehydrogenase B	cytoplasm|cytoplasm|mitochondrion|cytosol|membrane|extracellular vesicular exosome|	lactate metabolic process|pyruvate metabolic process|glycolytic process|NAD metabolic process|cellular metabolic process|cellular carbohydrate metabolic process|small molecule metabolic process|oxidation-reduction process|	L-lactate dehydrogenase activity|protein binding|kinase binding|identical protein binding|NAD binding|	2624.25	2736.25	2588.09	0.15311	0.030363	0.57473	0.0036265	0.0019868	0.47611	0.015227	Rank2
TMX2	thioredoxin-related transmembrane protein 2	cellular_component|integral component of membrane|	biological_process|cell redox homeostasis|	molecular_function|	53.3972	57.7108	49.0552	0.29849	0.45907	0.19498	0.014417	0.017519	0.01185	0.035763	Rank2
USP10	ubiquitin specific peptidase 10	nucleus|cytoplasm|early endosome|intermediate filament cytoskeleton|	DNA repair|ubiquitin-dependent protein catabolic process|autophagy|regulation of autophagy|protein deubiquitination|protein deubiquitination|DNA damage response, signal transduction by p53 class mediator|	p53 binding|cysteine-type endopeptidase activity|ubiquitin thiolesterase activity|ubiquitin thiolesterase activity|ubiquitin-specific protease activity|ubiquitin-specific protease activity|protein binding|ion channel binding|poly(A) RNA binding|	121.907	120.597	125.088	0.068387	0.011479	0.43266	0.043189	0.77593	0.0071362	0.0016414	Rank2
TADA3	transcriptional adaptor 3	intracellular|nucleus|Ada2/Gcn5/Ada3 transcription activator complex|STAGA complex|transcription factor TFTC complex|mitotic spindle|	regulation of protein phosphorylation|chromatin organization|transcription, DNA-templated|regulation of transcription from RNA polymerase II promoter|mitotic nuclear division|positive regulation of gene expression|intracellular estrogen receptor signaling pathway|regulation of histone deacetylation|regulation of protein stability|histone H3 acetylation|positive regulation of transcription, DNA-te…	sequence-specific DNA binding transcription factor activity|transcription coactivator activity|histone acetyltransferase activity|protein binding|ligand-dependent nuclear receptor binding|protein domain specific binding|ligand-dependent nuclear receptor transcription coactivator activity|	33.1053	36.5844	34.1505	0.10103	0.13947	0.0483	0.018122	0.084936	0.0011159	0.0022527	Rank2
USE1	unconventional SNARE in the ER 1 homolog (S. cerevisiae)	endoplasmic reticulum|endoplasmic reticulum membrane|integral component of membrane|	lysosomal transport|protein transport|protein catabolic process|secretion by cell|regulation of ER to Golgi vesicle-mediated transport|endoplasmic reticulum tubular network organization|	protein binding|	21.9202	19.9668	21.5779	0.19799	0.014153	0.23076	0.030324	0.039161	0.17726	0.040205	Rank2
PCF11	PCF11 cleavage and polyadenylation factor subunit	nucleoplasm|mRNA cleavage factor complex|	mRNA splicing, via spliceosome|transcription from RNA polymerase II promoter|termination of RNA polymerase II transcription|mRNA cleavage|RNA splicing|gene expression|mRNA 3'-end processing|	None	7.07381	6.38342	6.79348	0.24568	0.43935	0.052703	0.048772	0.02857	0.002909	0.048146	Rank2
CEP89	centrosomal protein 89kDa	spindle pole|cytoplasm|mitochondrial intermembrane space|centrosome|centriole|cytosol|plasma membrane|ciliary transition fiber|	cilium assembly|	None	5.57349	6.11256	5.77416	0.14381	0.63351	0.015265	0.0057577	0.0066214	0.32327	0.048146	Rank2
CLNS1A	chloride channel, nucleotide-sensitive, 1A	nucleus|cytoplasm|cytosol|cytosol|cytoskeleton|plasma membrane|methylosome|pICln-Sm protein complex|	spliceosomal snRNP assembly|spliceosomal snRNP assembly|chloride transport|cell volume homeostasis|gene expression|RNA metabolic process|ncRNA metabolic process|	protein binding|poly(A) RNA binding|	151.253	136.399	134.704	0.26243	0.054621	0.45314	7.0564e-05	0.00020707	0.00052679	0.0023414	Rank2
TSPYL2	TSPY-like 2	nucleus|nucleoplasm|nucleolus|cytoplasm|centrosome|plasma membrane|	nucleosome assembly|transcription, DNA-templated|regulation of transcription, DNA-templated|activation of signaling protein activity involved in unfolded protein response|cell cycle|negative regulation of DNA replication|regulation of signal transduction|chromatin modification|negative regulation of cell growth|endoplasmic reticulum unfolded protein response|cellular protein metabolic process|neg…	rDNA binding|	7.11223	7.51425	7.61655	0.076459	0.4618	0.016033	0.00073976	0.0002743	0.66465	0.0085382	Rank2
CALM2	calmodulin 2 (phosphorylase kinase, delta)	None	None	None	1946.57	1923.11	2021.28	0.44076	0.3198	0.91438	0.0022737	0.0094425	0.042602	0.011669	Rank2
FUBP1	far upstream element (FUSE) binding protein 1	nucleus|	regulation of transcription, DNA-templated|transcription from RNA polymerase II promoter|positive regulation of gene expression|	single-stranded DNA binding|sequence-specific DNA binding transcription factor activity|protein binding|poly(A) RNA binding|	43.4175	44.0939	37.7216	0.88309	0.84657	0.68641	0.00082855	0.007732	0.00020143	0.0070571	Rank2
MRPL52	mitochondrial ribosomal protein L52	mitochondrial large ribosomal subunit|	translation|	structural constituent of ribosome|	41.2492	40.9818	43.6065	0.14213	0.25502	0.01624	0.014037	0.022862	0.078823	0.016418	Rank2
SDE2	SDE2 telomere maintenance homolog (S. pombe)	None	None	None	3.44585	3.68307	3.48925	0.081109	0.0020181	0.3544	0.042064	0.022862	0.28481	0.010254	Rank2
FRAS1	Fraser extracellular matrix complex subunit 1	plasma membrane|integral component of membrane|extracellular matrix|sublamina densa|	morphogenesis of an epithelium|cell communication|protein transport|skin development|	metal ion binding|	7.55768	9.29139	9.31182	0.25738	0.5067	0.3544	0.0092587	0.018321	0.012883	0.010513	Rank2
RPL11	ribosomal protein L11	nucleolus|cytosol|membrane|cytosolic large ribosomal subunit|extracellular vesicular exosome|	nuclear-transcribed mRNA catabolic process, nonsense-mediated decay|rRNA processing|translation|translation|translational initiation|translational elongation|translational termination|protein targeting|SRP-dependent cotranslational protein targeting to membrane|gene expression|viral process|RNA metabolic process|mRNA metabolic process|viral life cycle|viral transcription|protein localization to n…	RNA binding|structural constituent of ribosome|protein binding|rRNA binding|poly(A) RNA binding|	2499.02	2087.84	2122.28	0.33397	0.2103	0.26172	0.0024292	0.0079604	0.00070641	0.00025839	Rank2
TBC1D5	TBC1 domain family, member 5	retromer complex|	positive regulation of Rab GTPase activity|	Rab GTPase activator activity|protein binding|	14.028	12.8923	12.1009	0.80297	0.5574	0.83893	0.00021169	0.00085626	0.009443	0.010513	Rank2
CYBA	cytochrome b-245, alpha polypeptide	mitochondrion|Golgi apparatus|membrane|apical plasma membrane|secretory granule|dendrite|phagocytic vesicle membrane|NADPH oxidase complex|NADPH oxidase complex|neuronal cell body|	positive regulation of endothelial cell proliferation|antigen processing and presentation of peptide antigen via MHC class I|antigen processing and presentation of exogenous peptide antigen via MHC class I, TAP-dependent|negative regulation of glomerular filtration by angiotensin|superoxide metabolic process|inflammatory response|smooth muscle hypertrophy|cytochrome complex assembly|positive regu…	protein binding|electron carrier activity|electron carrier activity|superoxide-generating NADPH oxidase activity|SH3 domain binding|heme binding|metal ion binding|protein heterodimerization activity|	142.664	160.637	169.367	0.68272	0.3331	0.58193	0.01109	0.022862	0.0046954	0.038824	Rank2
ZNF638	zinc finger protein 638	nucleus|nucleoplasm|cytoplasm|nuclear speck|intracellular membrane-bounded organelle|	transcription, DNA-templated|regulation of transcription, DNA-templated|RNA splicing|	nucleotide binding|double-stranded DNA binding|RNA binding|zinc ion binding|poly(A) RNA binding|	78.2817	78.5432	76.9038	0.52666	0.2496	0.80765	0.0002548	0.0025929	0.015753	0.00067664	Rank2
WDR4	WD repeat domain 4	nucleus|nucleoplasm|cytoplasm|	tRNA modification|tRNA methylation|RNA (guanine-N7)-methylation|	protein binding|tRNA (guanine-N7-)-methyltransferase activity|	10.7389	10.8549	11.479	0.05999	0.00086344	0.82843	0.0081051	0.3358	0.0001419	0.0091653	Rank2
ORC4	origin recognition complex, subunit 4	origin recognition complex|nucleus|nucleoplasm|nuclear origin of replication recognition complex|	G1/S transition of mitotic cell cycle|mitotic cell cycle|DNA replication|DNA replication initiation|	nucleotide binding|DNA replication origin binding|protein binding|ATP binding|nucleoside-triphosphatase activity|	37.3098	34.4181	31.6091	0.088906	0.40571	0.097274	0.007888	0.040206	0.0082714	0.004541	Rank2
DCP2	decapping mRNA 2	cytoplasmic mRNA processing body|nucleus|cytosol|RISC complex|	nuclear-transcribed mRNA catabolic process, nonsense-mediated decay|nuclear-transcribed mRNA catabolic process, deadenylation-dependent decay|mRNA catabolic process|gene expression|RNA metabolic process|mRNA metabolic process|exonucleolytic nuclear-transcribed mRNA catabolic process involved in deadenylation-dependent decay|histone mRNA catabolic process|RNA phosphodiester bond hydrolysis, exonuc…	RNA binding|protein binding|exoribonuclease activity, producing 5'-phosphomonoesters|manganese ion binding|m7G(5')pppN diphosphatase activity|	10.4797	11.2991	9.83679	0.10103	0.081196	0.080595	0.00073925	0.0109	6.9281e-06	2.566e-07	Rank2
LSM14A	LSM14A, SCD6 homolog A (S. cerevisiae)	cytoplasmic mRNA processing body|cytoplasm|cytoplasmic stress granule|intracellular membrane-bounded organelle|	regulation of translation|multicellular organismal development|cytoplasmic mRNA processing body assembly|cytoplasmic mRNA processing body assembly|RIG-I signaling pathway|positive regulation of type I interferon-mediated signaling pathway|	double-stranded DNA binding|double-stranded RNA binding|single-stranded RNA binding|poly(A) RNA binding|	116.131	114.619	119.524	0.11857	0.1505	0.27417	0.0057577	0.016002	0.0088625	0.00061916	Rank2
ETF1	eukaryotic translation termination factor 1	cytoplasm|cytosol|	nuclear-transcribed mRNA catabolic process, nonsense-mediated decay|translation|translational termination|regulation of translational termination|protein methylation|gene expression|RNA metabolic process|mRNA metabolic process|cellular protein metabolic process|	RNA binding|translation release factor activity|protein binding|translation termination factor activity|translation release factor activity, codon specific|ribosome binding|poly(A) RNA binding|	187.229	176.027	188.201	0.068387	0.026488	0.018359	0.073189	0.038104	0.5052	0.035762	Rank2
EIF3I	eukaryotic translation initiation factor 3, subunit I	cytosol|eukaryotic translation initiation factor 3 complex|eukaryotic 43S preinitiation complex|eukaryotic 48S preinitiation complex|extracellular vesicular exosome|	formation of translation preinitiation complex|translation|translational initiation|translational initiation|translational initiation|regulation of translational initiation|gene expression|cellular protein metabolic process|	translation initiation factor activity|translation initiation factor activity|protein binding|	1979.79	1945.21	1842.84	0.066305	0.016143	0.048301	0.08066	0.0066214	0.6871	0.0036593	Rank2
TRMT10A	tRNA methyltransferase 10 homolog A (S. cerevisiae)	extracellular vesicular exosome|	biological_process|methylation|	methyltransferase activity|poly(A) RNA binding|	4.2575	3.7755	3.38321	0.029307	0.12388	0.02912	0.53158	0.48586	0.21966	0.01406	Rank1
E2F5	E2F transcription factor 5, p130-binding	nucleoplasm|transcription factor complex|cytoplasm|	mitotic cell cycle|transcription, DNA-templated|transcription initiation from RNA polymerase II promoter|transforming growth factor beta receptor signaling pathway|organ morphogenesis|gene expression|positive regulation of transcription from RNA polymerase II promoter|regulation of cell cycle|	DNA binding|sequence-specific DNA binding transcription factor activity|protein binding|transcription factor binding|	4.13081	3.45992	3.69912	0.011228	0.28276	0.019422	0.29729	0.12224	0.80495	0.036317	Rank1
TRIM26	tripartite motif containing 26	cellular_component|cytoplasm|	innate immune response|negative regulation of viral entry into host cell|positive regulation of sequence-specific DNA binding transcription factor activity|negative regulation of viral release from host cell|	DNA binding|zinc ion binding|metal ion binding|	22.4429	24.1101	25.6604	0.0042043	0.019476	0.099967	0.66482	0.95828	0.14249	0.0023409	Rank1
TPRA1	transmembrane protein, adipocyte asscociated 1	integral component of membrane|	lipid metabolic process|G-protein coupled receptor signaling pathway|aging|	G-protein coupled receptor activity|	12.3039	14.1364	14.5043	0.02681	0.039923	0.050203	0.58703	0.54202	0.19936	0.047386	Rank1
NF2	neurofibromin 2 (merlin)	nucleus|nucleolus|cytoplasm|early endosome|cytoskeleton|plasma membrane|adherens junction|membrane|extrinsic component of membrane|lamellipodium|cortical actin cytoskeleton|filopodium membrane|cleavage furrow|ruffle membrane|perinuclear region of cytoplasm|	mesoderm formation|negative regulation of cell-matrix adhesion|negative regulation of protein kinase activity|ectoderm development|negative regulation of DNA replication|negative regulation of cell proliferation|negative regulation of cell proliferation|Schwann cell proliferation|negative regulation of cell-cell adhesion|actin cytoskeleton organization|negative regulation of cell migration|regula…	actin binding|protein binding|	49.7559	52.066	48.2796	0.0083504	0.010822	0.57296	0.16543	0.13179	0.6292	0.015227	Rank1
PDE8A	phosphodiesterase 8A	cytosol|extracellular vesicular exosome|	phosphorelay signal transduction system|cAMP catabolic process|regulation of transcription, DNA-templated|cyclic nucleotide metabolic process|intracellular signal transduction|	phosphorelay response regulator activity|3',5'-cyclic-nucleotide phosphodiesterase activity|3',5'-cyclic-AMP phosphodiesterase activity|metal ion binding|	21.8723	19.7037	18.7263	0.0056448	0.0088533	0.041453	0.83648	0.75359	0.81535	0.072993	Rank3
ZZZ3	zinc finger, ZZ-type containing 3	Ada2/Gcn5/Ada3 transcription activator complex|	chromatin organization|transcription, DNA-templated|regulation of transcription, DNA-templated|	DNA binding|chromatin binding|protein binding|zinc ion binding|	15.3828	15.2444	13.0764	0.036287	0.15475	0.027808	0.1243	0.12696	0.13066	0.010954	Rank1
SHQ1	SHQ1, H/ACA ribonucleoprotein assembly factor	nucleus|nucleoplasm|cytoplasm|cytosol|	ribonucleoprotein complex assembly|positive regulation of apoptotic process|negative regulation of rRNA processing|	protein binding|	20.068	20.4668	20.9327	0.024034	0.047388	0.036655	0.52039	0.43831	0.29158	0.1245	Rank3
POLH	polymerase (DNA directed), eta	nucleoplasm|	DNA synthesis involved in DNA repair|DNA-dependent DNA replication|DNA-dependent DNA replication|DNA repair|regulation of DNA repair|pyrimidine dimer repair|postreplication repair|response to UV-C|	damaged DNA binding|DNA-directed DNA polymerase activity|protein binding|metal ion binding|	2.3725	2.66165	2.28907	0.028777	0.049585	0.080595	0.31795	0.23608	0.93241	0.048146	Rank1
ADGRA3	G protein-coupled receptor 125	external side of plasma membrane|integral component of membrane|	G-protein coupled receptor signaling pathway|neuropeptide signaling pathway|	G-protein coupled receptor activity|	24.2129	24.3009	25.2798	0.0026519	0.013602	0.13032	0.56214	0.56092	0.26737	0.0080784	Rank1
SNRNP35	small nuclear ribonucleoprotein 35kDa (U11/U12)	nucleus|U12-type spliceosomal complex|	mRNA processing|RNA splicing|	nucleotide binding|RNA binding|	5.32769	5.55546	6.40849	0.048837	0.017892	0.25051	0.31109	0.16015	0.81254	0.0039	Rank1
UBE2E1	ubiquitin-conjugating enzyme E2E 1	ubiquitin ligase complex|nucleus|nucleoplasm|cytosol|	protein polyubiquitination|mitotic cell cycle|ubiquitin-dependent protein catabolic process|mitotic spindle assembly checkpoint|histone monoubiquitination|protein ubiquitination|cytokine-mediated signaling pathway|anaphase-promoting complex-dependent proteasomal ubiquitin-dependent protein catabolic process|ISG15-protein conjugation|histone H2B ubiquitination|negative regulation of ubiquitin-prot…	ubiquitin-protein transferase activity|protein binding|ATP binding|ISG15 ligase activity|	130.843	120.84	117.521	0.046645	0.82916	0.0082923	0.027365	0.14598	0.097866	0.050583	Rank3
RMI2	RecQ mediated genome instability 2	nucleus|cytoplasm|	DNA replication|	DNA binding|	9.35277	9.11042	9.17256	0.010746	0.017139	0.1089	0.12714	0.057686	0.45981	0.0057875	Rank1
CPSF6	cleavage and polyadenylation specific factor 6, 68kDa	nucleus|mRNA cleavage factor complex|membrane|ribonucleoprotein complex|paraspeckles|	mRNA polyadenylation|mRNA processing|protein tetramerization|	nucleotide binding|RNA binding|mRNA binding|protein binding|poly(A) RNA binding|	50.6623	53.1434	51.4286	0.0089934	0.0044902	0.44859	0.086271	0.42482	0.0011159	0.12778	Rank3
NEDD8	neural precursor cell expressed, developmentally down-regulated 8	nucleus|cytosol|extracellular vesicular exosome|	regulation of transcription from RNA polymerase II promoter|cellular protein modification process|proteolysis|ubiquitin-dependent protein catabolic process|transforming growth factor beta receptor signaling pathway|protein localization|anatomical structure morphogenesis|response to organic cyclic compound|protein neddylation|	protein binding|ubiquitin protein ligase binding|	129.974	143.826	111.941	0.0015568	0.054621	0.0051196	0.72777	0.42482	0.7726	0.035763	Rank1
UXT	ubiquitously-expressed, prefoldin-like chaperone	gamma-tubulin complex|nucleus|cytoplasm|centrosome|microtubule organizing center|cytoskeleton|prefoldin complex|	negative regulation of transcription from RNA polymerase II promoter|microtubule cytoskeleton organization|transcription, DNA-templated|protein folding|mitochondrion transport along microtubule|centrosome organization|	RNA polymerase II transcription corepressor activity|chromatin binding|protein binding|microtubule binding|beta-tubulin binding|unfolded protein binding|	22.9031	25.1314	21.8894	0.014834	0.0091643	0.24851	0.19827	0.15546	0.14179	0.048146	Rank1
SATB2	SATB homeobox 2	histone deacetylase complex|nucleus|transcription factor complex|cytoplasm|nuclear matrix|	negative regulation of transcription from RNA polymerase II promoter|neuron migration|osteoblast development|chromatin remodeling|transcription, DNA-templated|embryonic pattern specification|positive regulation of transcription from RNA polymerase II promoter|embryonic skeletal system morphogenesis|cartilage development|palate development|cellular response to organic substance|	chromatin binding|sequence-specific DNA binding transcription factor activity|protein binding|sequence-specific DNA binding|	2.59741	3.14252	2.77882	0.048838	0.89265	0.16155	0.067254	0.039161	0.5052	0.0013638	Rank1
SLC16A6	solute carrier family 16, member 6	integral component of plasma membrane|membrane|	monocarboxylic acid transport|transmembrane transport|	monocarboxylic acid transmembrane transporter activity|symporter activity|	2.29084	5.1112	4.47239	0.039686	0.026488	0.080595	0.38479	0.74253	0.12981	0.045911	Rank1
RPS9	ribosomal protein S9	nucleus|nucleolus|cytoplasm|cytosol|ribosome|membrane|cytosolic small ribosomal subunit|ribonucleoprotein complex|extracellular vesicular exosome|	nuclear-transcribed mRNA catabolic process, nonsense-mediated decay|translation|translation|translation|translational initiation|translational elongation|translational termination|regulation of translation|SRP-dependent cotranslational protein targeting to membrane|positive regulation of cell proliferation|gene expression|viral process|RNA metabolic process|mRNA metabolic process|viral life cycle…	structural constituent of ribosome|protein binding|rRNA binding|poly(A) RNA binding|translation regulator activity|	3316.71	3363.29	3677.65	0.020332	0.036255	0.031505	0.91086	0.41552	0.43284	0.18905	Rank3
LPP	LIM domain containing preferred translocation partner in lipoma	nucleus|cytoplasm|plasma membrane|focal adhesion|	cell adhesion|biological_process|	protein binding|zinc ion binding|	2.13475	2.52111	2.21767	0.00030458	1.6679e-05	0.78008	0.09876	0.18848	0.26076	0.011935	Rank1
RXRB	retinoid X receptor, beta	nucleus|nucleoplasm|	in utero embryonic development|maternal placenta development|transcription initiation from RNA polymerase II promoter|gene expression|steroid hormone mediated signaling pathway|positive regulation of transcription from RNA polymerase II promoter|retinoic acid receptor signaling pathway|ventricular cardiac muscle cell differentiation|cardiac muscle cell proliferation|cellular response to retinoic …	RNA polymerase II regulatory region sequence-specific DNA binding|RNA polymerase II transcription regulatory region sequence-specific DNA binding transcription factor activity involved in positive regulation of transcription|sequence-specific DNA binding transcription factor activity|steroid hormone receptor activity|transcription coactivator activity|ligand-activated sequence-specific DNA bindin…	9.98263	10.5678	9.28202	0.027407	0.38896	0.019422	0.091868	0.098573	0.31268	0.0030271	Rank1
CEP295	KIAA1731	cytoplasm|centrosome|cytoskeleton|	None	None	2.49277	2.63272	2.18367	0.020554	0.28693	0.1016	0.029961	0.41552	0.00034409	0.16751	Rank3
FAM20B	family with sequence similarity 20, member B	Golgi membrane|Golgi apparatus|integral component of membrane|	phosphorylation|	ATP binding|kinase activity|phosphotransferase activity, alcohol group as acceptor|	5.57015	6.30626	5.87158	0.036691	0.048843	0.40184	0.38886	0.71426	0.052848	0.048146	Rank1
CDC7	cell division cycle 7	nucleus|nucleoplasm|cytoplasm|microtubule cytoskeleton|intercellular bridge|	G1/S transition of mitotic cell cycle|mitotic cell cycle|DNA replication|protein phosphorylation|positive regulation of cell proliferation|positive regulation of nuclear cell cycle DNA replication|positive regulation of G2/M transition of mitotic cell cycle|cell cycle phase transition|cell division|	protein kinase activity|protein serine/threonine kinase activity|protein binding|ATP binding|kinase activity|metal ion binding|	10.4973	10.7619	9.37823	0.038776	0.020135	0.19683	0.62865	0.41105	0.45313	0.037534	Rank1
CDC16	cell division cycle 16	nucleoplasm|anaphase-promoting complex|cytoplasm|centrosome|spindle|cytosol|spindle microtubule|	mitotic cell cycle|mitotic nuclear division|regulation of mitosis|mitotic spindle assembly checkpoint|cell proliferation|anaphase-promoting complex-dependent proteasomal ubiquitin-dependent protein catabolic process|negative regulation of ubiquitin-protein ligase activity involved in mitotic cell cycle|positive regulation of ubiquitin-protein ligase activity involved in mitotic cell cycle|regulat…	protein binding|	52.5796	52.0981	57.8369	0.0060369	0.020135	0.01718	0.90743	0.41105	0.92961	0.16751	Rank3
ZBTB8OS	zinc finger and BTB domain containing 8 opposite strand	extracellular vesicular exosome|	None	None	30.466	26.4151	27.0763	0.047701	0.00090809	0.90525	0.3624	0.43831	0.03045	0.082918	Rank3
TIMM10	translocase of inner mitochondrial membrane 10 homolog (yeast)	mitochondrion|mitochondrial inner membrane|mitochondrial inner membrane|mitochondrial inner membrane presequence translocase complex|mitochondrial intermembrane space|mitochondrial intermembrane space protein transporter complex|	protein targeting to mitochondrion|sensory perception of sound|cellular protein metabolic process|protein import into mitochondrial inner membrane|protein import into mitochondrial inner membrane|chaperone-mediated protein transport|	transporter activity|protein binding|zinc ion binding|protein homodimerization activity|chaperone binding|	38.4732	39.6095	43.6692	0.018338	0.0099592	0.19785	0.45665	0.41552	0.15025	0.011669	Rank1
POLR2G	polymerase (RNA) II (DNA directed) polypeptide G	cytoplasmic mRNA processing body|nucleus|nucleoplasm|DNA-directed RNA polymerase II, core complex|nucleolus|	nuclear-transcribed mRNA catabolic process, exonucleolytic|mRNA splicing, via spliceosome|DNA repair|transcription-coupled nucleotide-excision repair|nucleotide-excision repair|transcription from RNA polymerase II promoter|transcription from RNA polymerase II promoter|transcription initiation from RNA polymerase II promoter|transcription initiation from RNA polymerase II promoter|transcription el…	single-stranded DNA binding|single-stranded RNA binding|DNA-directed RNA polymerase activity|translation initiation factor binding|	76.4585	82.1345	83.9108	0.010746	0.1408	0.0021804	0.39177	0.41552	0.14249	0.0030271	Rank1
MSANTD3	Myb/SANT-like DNA-binding domain containing 3	None	None	identical protein binding|	23.6982	28.2985	24.1365	0.019876	0.044634	0.21072	0.3741	0.42932	0.38185	0.035763	Rank1
AVEN	apoptosis, caspase activation inhibitor	intracellular|endomembrane system|membrane|	apoptotic process|negative regulation of apoptotic process|	protein binding|	2.64665	2.71582	2.49475	0.036691	0.0077443	0.69698	0.3266	0.46031	0.043368	0.34863	Rank3
SECISBP2	SECIS binding protein 2	nucleus|mitochondrion|ribonucleoprotein complex|	translation|	mRNA 3'-UTR binding|selenocysteine insertion sequence binding|ribonucleoprotein complex binding|poly(A) RNA binding|	13.6196	13.6884	11.8517	0.0092726	0.023229	0.26757	0.90857	0.47318	0.86265	0.040205	Rank1
HSPA4	heat shock 70kDa protein 4	mitochondrion|cytosol|extracellular vesicular exosome|	response to unfolded protein|protein import into mitochondrial outer membrane|chaperone-mediated protein complex assembly|	ATP binding|	169.001	176.011	181.31	0.017505	0.044634	0.25819	0.16969	0.44278	0.019038	0.064544	Rank3
DXO	decapping exoribonuclease	nucleus|	mRNA catabolic process|metabolic process|RNA destabilization|nuclear mRNA surveillance|nucleic acid phosphodiester bond hydrolysis|	nucleotide binding|magnesium ion binding|mRNA binding|5'-3' exonuclease activity|RNA pyrophosphohydrolase activity|	3.83711	4.04532	4.88952	0.02293	0.81393	0.013885	0.24226	0.43605	0.044125	0.1261	Rank3
CCNYL1	cyclin Y-like 1	None	regulation of cyclin-dependent protein serine/threonine kinase activity|	protein kinase binding|	7.47724	7.65089	6.80613	0.039686	0.015429	0.43025	0.09876	0.084936	0.47611	0.01406	Rank1
TSPAN9	tetraspanin 9	integral component of plasma membrane|membrane|	None	None	3.16129	3.79943	3.99645	0.024304	0.038652	0.089031	0.45937	0.36888	0.63626	0.01469	Rank1
TTC3	tetratricopeptide repeat domain 3	nucleus|mitochondrion|vacuole|	ubiquitin-dependent protein catabolic process|negative regulation of cell morphogenesis involved in differentiation|negative regulation of neuron differentiation|protein K48-linked ubiquitination|	ubiquitin-protein transferase activity|protein binding|zinc ion binding|ligase activity|	49.0951	54.3281	45.7588	0.01611	0.063389	0.042348	0.28529	0.4559	0.011663	0.05427	Rank3
SYPL1	synaptophysin-like 1	integral component of plasma membrane|integral component of membrane|secretory granule|integral component of synaptic vesicle membrane|cytoplasmic vesicle membrane|melanosome|extracellular vesicular exosome|	transport|synaptic transmission|	transporter activity|	82.6348	93.3206	84.7001	0.0061437	0.043274	0.081038	0.58984	0.71953	0.043747	0.050584	Rank3
YKT6	YKT6 v-SNARE homolog (S. cerevisiae)	Golgi membrane|cytoplasm|mitochondrion|endosome|endoplasmic reticulum|Golgi apparatus|cytosol|integral component of plasma membrane|cytoplasmic vesicle membrane|SNARE complex|SNARE complex|extracellular vesicular exosome|	ER to Golgi vesicle-mediated transport|vesicle targeting|vesicle docking involved in exocytosis|metabolic process|metabolic process|protein transport|retrograde transport, endosome to Golgi|	SNAP receptor activity|protein-cysteine S-palmitoyltransferase activity|	122.598	135.672	144.395	0.0013982	0.010339	0.019641	0.86463	0.41552	0.84085	0.81772	Rank3
XRCC6	X-ray repair complementing defective repair in Chinese hamster cells 6	nuclear telomere cap complex|nucleus|nucleoplasm|transcription factor complex|nucleolus|cytosol|membrane|Ku70:Ku80 complex|nonhomologous end joining complex|	telomere maintenance|DNA ligation|DNA repair|double-strand break repair|double-strand break repair via nonhomologous end joining|double-strand break repair via nonhomologous end joining|transcription, DNA-templated|brain development|viral process|positive regulation of type I interferon production|DNA duplex unwinding|DNA duplex unwinding|V(D)J recombination|innate immune response|negative regula…	DNA binding|damaged DNA binding|double-stranded DNA binding|double-stranded telomeric DNA binding|ATP-dependent DNA helicase activity|protein binding|ATP binding|protein C-terminus binding|transcription regulatory region DNA binding|poly(A) RNA binding|5'-deoxyribose-5-phosphate lyase activity|	1298.64	1339.09	1327.16	0.0089939	0.0036106	0.71878	0.059298	0.25044	0.025252	0.19336	Rank3
TELO2	telomere maintenance 2	chromosome, telomeric region|intracellular|nucleus|cytoplasm|membrane|TORC1 complex|TORC2 complex|	regulation of TOR signaling|	protein binding|protein complex binding|protein complex scaffold|	7.1962	7.63669	9.70277	0.0007644	0.0062201	0.2609	0.26443	0.14598	0.43179	0.0098125	Rank1
PTPMT1	protein tyrosine phosphatase, mitochondrial 1	nucleus|mitochondrion|mitochondrial inner membrane|	protein dephosphorylation|phospholipid metabolic process|phosphatidylglycerol biosynthetic process|cardiolipin biosynthetic process|peptidyl-tyrosine dephosphorylation|small molecule metabolic process|glycerophospholipid biosynthetic process|inositol phosphate dephosphorylation|	phosphatidylinositol-4,5-bisphosphate 5-phosphatase activity|protein tyrosine phosphatase activity|protein tyrosine/serine/threonine phosphatase activity|phosphatidylglycerophosphatase activity|	21.1663	21.7605	23.4379	0.02825	0.80988	0.00013318	0.22316	0.41105	0.024494	0.08795	Rank3
ARPC1B	actin related protein 2/3 complex, subunit 1B, 41kDa	cytoplasm|Arp2/3 protein complex|actin cytoskeleton|extracellular vesicular exosome|	cellular component movement|regulation of actin filament polymerization|	actin binding|structural constituent of cytoskeleton|	355.021	381.317	426.737	0.020332	0.040591	0.19498	0.87787	0.67185	0.73058	0.035762	Rank1
FAN1	FANCD2/FANCI-associated nuclease 1	nucleus|	double-strand break repair via homologous recombination|DNA catabolic process, endonucleolytic|DNA repair|nucleotide-excision repair|nucleotide-excision repair, DNA incision|nucleotide-excision repair, DNA incision|	magnesium ion binding|DNA binding|phosphodiesterase I activity|protein binding|5'-3' exonuclease activity|5'-flap endonuclease activity|ubiquitin binding|	35.828	37.0165	35.5551	0.0088744	0.0011662	0.027808	0.65923	0.7621	0.65618	0.086664	Rank3
SCAF11	SR-related CTD-associated factor 11	nucleus|nucleolus|	spliceosomal complex assembly|RNA splicing, via transesterification reactions|mRNA processing|RNA splicing|	protein binding|zinc ion binding|poly(A) RNA binding|	43.1389	43.6722	38.8084	0.0088749	0.16636	0.0030873	0.13426	0.12224	0.62495	0.016744	Rank1
SLC1A5	solute carrier family 1 (neutral amino acid transporter), member 5	Golgi apparatus|plasma membrane|plasma membrane|integral component of plasma membrane|membrane|melanosome|extracellular vesicular exosome|	amino acid transmembrane transport|ion transport|dicarboxylic acid transport|extracellular amino acid transport|amino acid transport|glutamine transport|response to virus|neutral amino acid transport|L-serine transport|transmembrane transport|	virus receptor activity|receptor activity|protein binding|neutral amino acid transmembrane transporter activity|L-glutamine transmembrane transporter activity|L-serine transmembrane transporter activity|sodium:dicarboxylate symporter activity|	171.454	163.702	162.339	0.022929	0.016143	0.068664	0.78295	0.62109	0.47611	0.035763	Rank1
RAD23B	RAD23 homolog B (S. cerevisiae)	proteasome complex|nucleus|nucleoplasm|cytoplasm|XPC complex|	nucleotide-excision repair, DNA damage recognition|nucleotide-excision repair, DNA damage recognition|nucleotide-excision repair, DNA damage removal|DNA repair|nucleotide-excision repair|nucleotide-excision repair|spermatogenesis|regulation of proteasomal ubiquitin-dependent protein catabolic process|proteasome-mediated ubiquitin-dependent protein catabolic process|	damaged DNA binding|single-stranded DNA binding|protein binding|polyubiquitin binding|	131.129	125.418	114.92	0.02293	0.37767	0.010461	0.4263	0.86335	0.21395	0.039508	Rank1
COX4I1	cytochrome c oxidase subunit IV isoform 1	nucleus|mitochondrion|mitochondrial inner membrane|membrane|extracellular vesicular exosome|	generation of precursor metabolites and energy|response to nutrient|respiratory electron transport chain|cellular metabolic process|small molecule metabolic process|hydrogen ion transmembrane transport|hydrogen ion transmembrane transport|	cytochrome-c oxidase activity|protein binding|	1244.55	1263.38	1239.14	0.0011067	0.016143	0.013538	0.86307	0.4941	0.88444	0.058228	Rank3
TRAPPC13	trafficking protein particle complex 13	None	None	protein binding|	18.2739	19.0684	17.9733	0.031809	0.072783	0.025619	0.68703	0.48586	0.29896	0.009812	Rank1
PAK1IP1	PAK1 interacting protein 1	nucleus|plasma membrane|	negative regulation of signal transduction|	None	8.04383	7.34041	7.35825	0.02681	0.016845	0.49078	0.12531	0.23608	0.10607	0.024065	Rank1
SEC11C	SEC11 homolog C (S. cerevisiae)	endoplasmic reticulum membrane|integral component of membrane|	translation|signal peptide processing|proteolysis|SRP-dependent cotranslational protein targeting to membrane|gene expression|cellular protein metabolic process|regulation of insulin secretion|	serine-type peptidase activity|	40.5172	45.3345	41.6064	0.022929	0.24163	0.32291	0.12251	0.037052	0.63059	0.0053338	Rank1
PLAU	plasminogen activator, urokinase	extracellular region|extracellular space|plasma membrane|cell surface|extracellular vesicular exosome|	response to hypoxia|proteolysis|chemotaxis|signal transduction|blood coagulation|regulation of receptor activity|smooth muscle cell migration|regulation of smooth muscle cell migration|regulation of cell adhesion mediated by integrin|regulation of cell proliferation|fibrinolysis|regulation of wound healing|regulation of smooth muscle cell-matrix adhesion|	serine-type endopeptidase activity|protein binding|	14.173	15.2624	13.1354	0.0076771	0.03133	0.21887	0.75532	0.82219	0.60303	0.047386	Rank1
PIN4	protein (peptidylprolyl cis/trans isomerase) NIMA-interacting, 4 (parvulin)	nucleus|nucleolus|nucleolus|cytoplasm|mitochondrial matrix|mitochondrial matrix|spindle|spindle|preribosome|extracellular vesicular exosome|	protein peptidyl-prolyl isomerization|rRNA processing|protein folding|	DNA binding|bent DNA binding|double-stranded DNA binding|peptidyl-prolyl cis-trans isomerase activity|poly(A) RNA binding|	31.325	28.865	28.1569	0.013649	0.03802	0.21777	0.16426	0.1979	0.27086	0.040205	Rank1
RTKN	rhotekin	cellular_component|	apoptotic process|signal transduction|Rho protein signal transduction|negative regulation of catalytic activity|	GTPase inhibitor activity|protein binding|GTP binding|GTP-Rho binding|	21.0257	23.2864	24.1556	0.014138	0.011031	0.18848	0.66482	0.45589	0.58578	0.012963	Rank1
NELFB	negative elongation factor complex member B	nucleus|nucleoplasm|cytoplasm|NELF complex|	transcription from RNA polymerase II promoter|transcription elongation from RNA polymerase II promoter|gene expression|viral process|negative regulation of transcription, DNA-templated|positive regulation of viral transcription|	protein binding|	11.6983	13.0661	14.9006	0.0054529	0.09953	0.0067917	0.43734	0.48998	0.21395	0.047386	Rank1
UTP14A	UTP14, U3 small nucleolar ribonucleoprotein, homolog A (yeast)	nucleolus|small-subunit processome|	rRNA processing|	protein binding|poly(A) RNA binding|	18.9431	17.181	15.423	0.0083504	0.050269	0.025367	0.17436	0.13179	0.15924	0.0032842	Rank1
PRRC2C	proline-rich coiled-coil 2C	membrane|	None	protein C-terminus binding|poly(A) RNA binding|	27.1795	30.4839	27.9903	0.031119	0.011031	0.33082	0.38886	0.58655	0.12767	0.038824	Rank1
ADK	adenosine kinase	nucleus|cytosol|	purine nucleobase metabolic process|purine ribonucleoside salvage|dATP biosynthetic process|ribonucleoside monophosphate biosynthetic process|positive regulation of cardiac muscle hypertrophy|phosphorylation|circadian regulation of gene expression|positive regulation of T cell proliferation|purine-containing compound salvage|AMP salvage|small molecule metabolic process|type B pancreatic cell prol…	adenosine kinase activity|ATP binding|phosphotransferase activity, alcohol group as acceptor|poly(A) RNA binding|metal ion binding|	100.117	88.2379	69.4585	0.048837	0.03802	0.36707	0.22163	0.23608	0.42077	0.045912	Rank1
RNFT2	ring finger protein, transmembrane 2	integral component of membrane|	None	zinc ion binding|	2.1323	2.48793	2.79311	0.04715	0.18324	0.0019638	0.22316	0.1979	0.47837	0.009812	Rank1
FTH1	ferritin, heavy polypeptide 1	nucleus|cytosol|intracellular ferritin complex|extracellular vesicular exosome|	iron ion transport|cellular iron ion homeostasis|intracellular sequestering of iron ion|post-Golgi vesicle-mediated transport|immune response|negative regulation of cell proliferation|negative regulation of fibroblast proliferation|transmembrane transport|oxidation-reduction process|membrane organization|	ferroxidase activity|iron ion binding|protein binding|ferric iron binding|	3064.72	3152.65	3089.92	0.033198	0.0085582	0.32291	0.90972	0.53031	0.88444	0.049731	Rank1
FAM91A1	family with sequence similarity 91, member A1	None	None	None	32.941	36.6165	32.8758	0.039686	0.053885	0.16937	0.29729	0.21216	0.037613	0.0030276	Rank1
NAA20	N(alpha)-acetyltransferase 20, NatB catalytic subunit	intracellular|nucleus|cytoplasm|	metabolic process|	peptide alpha-N-acetyltransferase activity|	85.6975	80.617	64.1979	0.0015568	0.0099598	0.019422	0.91741	0.41105	0.9258	0.05427	Rank3
CDC23	cell division cycle 23	intracellular|nucleoplasm|anaphase-promoting complex|cytosol|	mitotic G1 phase|mitotic cell cycle|ubiquitin-dependent protein catabolic process|cell cycle|mitotic nuclear division|mitotic metaphase plate congression|metaphase/anaphase transition of mitotic cell cycle|mitotic spindle assembly checkpoint|regulation of exit from mitosis|regulation of mitotic metaphase/anaphase transition|anaphase-promoting complex-dependent proteasomal ubiquitin-dependent prot…	ubiquitin-protein transferase activity|	16.4869	18.1439	15.2041	0.015358	0.12747	0.02912	0.12531	0.11127	0.16132	0.001703	Rank1
ELMO3	engulfment and cell motility 3	cytoplasm|cytoskeleton|	phagocytosis|apoptotic process|	SH3 domain binding|	11.2068	12.4041	11.7733	0.030464	0.031331	0.18076	0.45937	0.63751	0.37662	0.0022527	Rank1
TINAGL1	tubulointerstitial nephritis antigen-like 1	extracellular region|extracellular space|cytoplasm|extracellular matrix|extracellular vesicular exosome|	proteolysis|receptor-mediated endocytosis|immune response|endosomal transport|	scavenger receptor activity|extracellular matrix structural constituent|cysteine-type peptidase activity|polysaccharide binding|laminin binding|	15.0253	19.2475	15.5328	0.046644	0.4337	0.034788	0.71717	0.43379	0.41099	0.012425	Rank1
IMP4	IMP4, U3 small nucleolar ribonucleoprotein	nucleolus|ribonucleoprotein complex|	rRNA processing|	protein binding|	102.744	90.6891	110.703	0.00011726	0.012785	0.0016692	0.76937	0.41105	0.62786	0.12778	Rank3
TAF2	TAF2 RNA polymerase II, TATA box binding protein (TBP)-associated factor, 150kDa	transcription factor TFIID complex|transcription factor TFIID complex|transcription factor TFTC complex|	G2/M transition of mitotic cell cycle|transcription initiation from RNA polymerase II promoter|proteolysis|response to organic cyclic compound|positive regulation of transcription from RNA polymerase II promoter|	protein binding|metallopeptidase activity|zinc ion binding|transcription regulatory region DNA binding|	24.5804	25.1842	25.0544	0.01464	0.0032405	0.29795	0.13686	0.43831	0.013315	0.18045	Rank3
ARCN1	archain 1	cytoplasm|endoplasmic reticulum|Golgi apparatus|cytosol|membrane|COPI vesicle coat|clathrin adaptor complex|intracellular membrane-bounded organelle|	intracellular protein transport|retrograde vesicle-mediated transport, Golgi to ER|adult locomotory behavior|cerebellar Purkinje cell layer maturation|pigmentation|COPI coating of Golgi vesicle|membrane organization|	poly(A) RNA binding|	79.4745	83.0008	76.6049	0.039686	0.049585	0.015627	0.16426	0.11286	0.93941	0.18045	Rank3
PRPF18	pre-mRNA processing factor 18	nucleus|spliceosomal complex|nuclear speck|	mRNA processing|RNA splicing|	potassium channel inhibitor activity|	9.01529	9.14639	9.84282	0.018973	0.075546	0.023549	0.72777	0.51842	0.73058	0.048937	Rank1
NDUFA13	NADH dehydrogenase (ubiquinone) 1 alpha subcomplex, 13	nucleoplasm|cytoplasm|mitochondrion|mitochondrial inner membrane|mitochondrial respiratory chain|mitochondrial respiratory chain complex I|integral component of membrane|mitochondrial membrane|extracellular vesicular exosome|	respiratory electron transport chain|negative regulation of cell growth|negative regulation of cell growth|cellular metabolic process|small molecule metabolic process|protein import into mitochondrial inner membrane|negative regulation of transcription, DNA-templated|reactive oxygen species metabolic process|apoptotic signaling pathway|extrinsic apoptotic signaling pathway|negative regulation of …	NADH dehydrogenase activity|protein binding|ATP binding|NADH dehydrogenase (ubiquinone) activity|	146.464	158.765	168.074	0.0059415	0.5348	0.0011966	0.074524	0.45373	0.00094401	0.058228	Rank3
MRPL43	mitochondrial ribosomal protein L43	mitochondrial ribosome|	translation|	structural constituent of ribosome|poly(A) RNA binding|	87.7828	99.052	104.899	0.00043082	0.0072876	0.042349	0.87787	0.41105	0.86575	0.056223	Rank3
CTNNA1	catenin (cadherin-associated protein), alpha 1, 102kDa	acrosomal vesicle|cytosol|plasma membrane|cell-cell junction|zonula adherens|intercalated disc|actin cytoskeleton|catenin complex|lamellipodium|	ovarian follicle development|cell adhesion|establishment or maintenance of cell polarity|negative regulation of neuroblast proliferation|aging|male gonad development|gap junction assembly|axon regeneration|cell junction assembly|adherens junction organization|cellular protein localization|odontogenesis of dentin-containing tooth|muscle cell differentiation|negative regulation of apoptotic process…	structural molecule activity|protein binding|beta-catenin binding|vinculin binding|poly(A) RNA binding|gamma-catenin binding|cadherin binding|actin filament binding|	526.586	523.861	529.479	0.035907	0.87114	0.10432	0.0043182	0.0082067	0.19097	0.24928	Rank3
NT5C	5', 3'-nucleotidase, cytosolic	nucleus|cytoplasm|mitochondrion|cytosol|extracellular vesicular exosome|	purine nucleobase metabolic process|purine nucleotide catabolic process|pyrimidine nucleobase metabolic process|pyrimidine deoxyribonucleotide catabolic process|dephosphorylation|small molecule metabolic process|pyrimidine nucleoside catabolic process|nucleobase-containing small molecule metabolic process|	nucleotidase activity|5'-nucleotidase activity|pyrimidine nucleotide binding|metal ion binding|	54.3207	54.3678	55.8106	0.015357	0.011031	0.20277	0.16426	0.10003	0.99247	0.0045415	Rank1
CCDC93	coiled-coil domain containing 93	None	None	None	2.95375	2.97176	2.97103	0.031808	0.1287	0.041183	0.34361	0.42482	0.022151	0.10264	Rank3
FARSA	phenylalanyl-tRNA synthetase, alpha subunit	cytoplasm|cytosol|membrane|	tRNA aminoacylation for protein translation|phenylalanyl-tRNA aminoacylation|gene expression|	tRNA binding|phenylalanine-tRNA ligase activity|protein binding|ATP binding|poly(A) RNA binding|	181.67	195.219	208.035	0.047151	0.17508	0.018575	0.22011	0.43379	0.0026545	0.16751	Rank3
NOP10	NOP10 ribonucleoprotein	nucleolus|small nucleolar ribonucleoprotein complex|Cajal body|box H/ACA RNP complex|	pseudouridine synthesis|rRNA processing|	protein binding|snoRNA binding|	53.9198	57.5952	57.1575	0.018757	0.006022	0.12424	0.41514	0.43379	0.032138	0.064544	Rank3
NBPF14	NA	NA	NA	NA	3.1472	3.38563	3.16433	0.0092721	0.020473	0.019014	0.57599	0.41105	0.59888	0.3012	Rank3
APOL2	apolipoprotein L, 2	extracellular region|endoplasmic reticulum membrane|membrane|	lipid metabolic process|lipid transport|acute-phase response|multicellular organismal development|cholesterol metabolic process|lipoprotein metabolic process|maternal process involved in female pregnancy|	receptor binding|high-density lipoprotein particle binding|lipid binding|	3.27435	4.71185	4.5531	0.030464	0.023636	0.0054357	0.90034	0.8497	0.8721	0.54282	Rank3
MRPL40	mitochondrial ribosomal protein L40	nucleus|nucleolus|mitochondrion|mitochondrial ribosome|	anatomical structure morphogenesis|	poly(A) RNA binding|	24.8797	25.1836	24.1575	0.03145	0.15475	0.025619	0.58146	0.41552	0.46311	0.048146	Rank1
LUC7L2	C7orf55-LUC7L2 readthrough	None	None	None	136.429	145.111	141.165	0.003978	0.10725	0.053701	0.23157	0.43379	0.0082714	0.0029301	Rank1
MED17	mediator complex subunit 17	nucleus|nucleoplasm|transcription factor complex|membrane|mediator complex|	regulation of transcription from RNA polymerase II promoter|transcription initiation from RNA polymerase II promoter|transcription initiation from RNA polymerase II promoter|gene expression|stem cell maintenance|intracellular steroid hormone receptor signaling pathway|androgen receptor signaling pathway|positive regulation of transcription, DNA-templated|positive regulation of transcription from …	RNA polymerase II transcription cofactor activity|transcription cofactor activity|transcription coactivator activity|receptor activity|ligand-dependent nuclear receptor transcription coactivator activity|vitamin D receptor binding|thyroid hormone receptor binding|	89.3502	90.8655	92.5175	0.0033114	0.00042672	0.45314	0.36729	0.42932	0.0021541	0.14107	Rank3
CCT3	chaperonin containing TCP1, subunit 3 (gamma)	zona pellucida receptor complex|cytoplasm|cytosol|chaperonin-containing T-complex|cytoskeleton|microtubule|plasma membrane|cell body|extracellular vesicular exosome|	protein folding|binding of sperm to zona pellucida|cellular protein metabolic process|'de novo' posttranslational protein folding|	protein binding|ATP binding|poly(A) RNA binding|unfolded protein binding|	1420.35	1476.68	1302.12	0.0058378	0.044634	0.012	0.92948	0.46898	0.92961	0.1546	Rank3
FBL	fibrillarin	granular component|nucleus|nucleolus|Cajal body|membrane|box C/D snoRNP complex|extracellular vesicular exosome|	osteoblast differentiation|rRNA processing|tRNA processing|snoRNA metabolic process|histone glutamine methylation|	RNA binding|protein binding|poly(A) RNA binding|histone-glutamine methyltransferase activity|	1787.65	1554.42	1744.79	0.015529	0.10725	0.0021799	0.27136	0.41105	0.039721	0.81965	Rank3
DDX51	DEAD (Asp-Glu-Ala-Asp) box polypeptide 51	nucleolus|membrane|	ATP catabolic process|rRNA processing|	ATP binding|ATP-dependent helicase activity|poly(A) RNA binding|	5.572	5.47431	5.9714	1.283e-06	0.051742	0.00019836	0.67038	0.41552	0.7203	0.014689	Rank1
GPN2	GPN-loop GTPase 2	cellular_component|	biological_process|	molecular_function|GTP binding|	3.57012	3.60309	2.91314	0.0031297	0.00035077	0.35328	0.90743	0.41552	0.76886	0.048146	Rank1
ALDOA	aldolase A, fructose-bisphosphate	extracellular region|extracellular space|nucleus|cytosol|actin cytoskeleton|membrane|platelet alpha granule lumen|M band|I band|extracellular vesicular exosome|	platelet degranulation|carbohydrate metabolic process|fructose metabolic process|glucose metabolic process|gluconeogenesis|glycolytic process|glycolytic process|glycolytic process|ATP biosynthetic process|striated muscle contraction|actin filament organization|blood coagulation|regulation of cell shape|platelet activation|fructose 1,6-bisphosphate metabolic process|small molecule metabolic proces…	actin binding|fructose-bisphosphate aldolase activity|protein binding|cytoskeletal protein binding|tubulin binding|identical protein binding|poly(A) RNA binding|fructose binding|	1951.79	1907.55	1904.61	0.044545	0.80785	0.0021311	0.097524	0.0043696	0.88444	0.08795	Rank3
XRCC5	X-ray repair complementing defective repair in Chinese hamster cells 5 (double-strand-break rejoining)	nuclear telomere cap complex|nuclear chromosome, telomeric region|nucleus|nucleoplasm|cytosol|membrane|Ku70:Ku80 complex|nonhomologous end joining complex|	telomere maintenance|DNA repair|double-strand break repair|double-strand break repair via nonhomologous end joining|double-strand break repair via nonhomologous end joining|DNA recombination|transcription, DNA-templated|brain development|cell proliferation|viral process|positive regulation of type I interferon production|DNA duplex unwinding|DNA duplex unwinding|response to drug|innate immune res…	DNA binding|damaged DNA binding|double-stranded DNA binding|double-stranded telomeric DNA binding|ATP-dependent DNA helicase activity|protein binding|ATP binding|protein C-terminus binding|ubiquitin protein ligase binding|telomeric DNA binding|transcription regulatory region DNA binding|poly(A) RNA binding|5'-deoxyribose-5-phosphate lyase activity|	570.765	552.35	554.864	0.02705	0.043274	0.38308	0.16426	0.43379	0.00036052	0.22342	Rank3
GSPT1	G1 to S phase transition 1	intracellular|	G1/S transition of mitotic cell cycle|nuclear-transcribed mRNA catabolic process, nonsense-mediated decay|GTP catabolic process|GTP catabolic process|translational termination|protein methylation|	translation release factor activity|GTPase activity|protein binding|GTP binding|poly(A) RNA binding|	154.484	141.165	141.642	0.010384	0.0074082	0.28465	0.19827	0.1032	0.55643	0.0023414	Rank1
PSMC4	proteasome (prosome, macropain) 26S subunit, ATPase, 4	proteasome complex|nucleus|nucleoplasm|cytoplasm|cytosol|membrane|inclusion body|proteasome accessory complex|cytosolic proteasome complex|	G1/S transition of mitotic cell cycle|protein polyubiquitination|mitotic cell cycle|blastocyst development|antigen processing and presentation of peptide antigen via MHC class I|antigen processing and presentation of exogenous peptide antigen via MHC class I, TAP-dependent|ATP catabolic process|proteolysis|regulation of cellular amino acid metabolic process|apoptotic process|DNA damage response, …	protein binding|ATP binding|ATPase activity|	96.1916	107.686	94.7787	0.010625	0.81393	0.0067008	0.13426	0.41105	0.00036103	0.052325	Rank3
ALG2	ALG2, alpha-1,3/1,6-mannosyltransferase	nucleus|cytoplasm|endoplasmic reticulum membrane|membrane|integral component of membrane|perinuclear region of cytoplasm|	dolichol-linked oligosaccharide biosynthetic process|dolichol-linked oligosaccharide biosynthetic process|protein N-linked glycosylation via asparagine|protein glycosylation in endoplasmic reticulum|post-translational protein modification|cellular protein metabolic process|response to calcium ion|mannosylation|mannosylation|	alpha-1,3-mannosyltransferase activity|GDP-Man:Man1GlcNAc2-PP-Dol alpha-1,3-mannosyltransferase activity|protein binding|glycolipid 6-alpha-mannosyltransferase activity|protein anchor|protein heterodimerization activity|protein N-terminus binding|calcium-dependent protein binding|calcium-dependent protein binding|	12.1228	13.876	12.7528	0.0019463	0.014153	0.0048573	0.92754	0.42482	0.95786	0.1261	Rank3
RBL1	retinoblastoma-like 1	nucleus|nucleoplasm|transcription factor complex|	negative regulation of transcription from RNA polymerase II promoter|mitotic cell cycle|transcription, DNA-templated|transcription initiation from RNA polymerase II promoter|transforming growth factor beta receptor signaling pathway|gene expression|viral process|chromatin modification|regulation of lipid kinase activity|positive regulation of transcription from RNA polymerase II promoter|regulati…	protein binding|transcription factor binding|	7.72416	7.34783	7.7387	0.046645	0.098524	0.068664	0.03265	0.0090016	0.96329	0.8362	Rank3
TAF1C	TATA box binding protein (TBP)-associated factor, RNA polymerase I, C, 110kDa	nucleoplasm|	regulation of transcription, DNA-templated|transcription from RNA polymerase I promoter|transcription initiation from RNA polymerase I promoter|transcription elongation from RNA polymerase I promoter|termination of RNA polymerase I transcription|transcription from RNA polymerase II promoter|gene expression|	DNA binding|protein binding|	14.8072	15.1966	18.4406	0.035906	0.026089	0.53418	0.2661	0.18848	0.43284	0.0056366	Rank1
CCDC137	coiled-coil domain containing 137	None	None	poly(A) RNA binding|	24.7717	24.6249	29.6487	0.016898	0.071038	0.21777	0.18614	0.44278	0.0078711	0.022986	Rank1
MAF1	MAF1 homolog (S. cerevisiae)	intracellular|nucleus|cytoplasm|cytosol|plasma membrane|axon|dendrite|inhibitory synapse|	transcription, DNA-templated|negative regulation of transcription from RNA polymerase III promoter|	RNA polymerase III type 1 promoter DNA binding|RNA polymerase III type 2 promoter DNA binding|RNA polymerase III type 3 promoter DNA binding|	44.8081	52.3066	49.1826	0.048838	0.031331	0.14382	0.31109	0.20742	0.97339	0.0039005	Rank1
VEGFA	vascular endothelial growth factor A	extracellular region|proteinaceous extracellular matrix|extracellular space|extracellular space|cytoplasm|cell surface|membrane|secretory granule|platelet alpha granule lumen|	negative regulation of transcription from RNA polymerase II promoter|angiogenesis|ovarian follicle development|patterning of blood vessels|vasculogenesis|response to hypoxia|in utero embryonic development|kidney development|positive regulation of protein phosphorylation|positive regulation of endothelial cell proliferation|positive regulation of endothelial cell proliferation|cell migration invol…	fibronectin binding|cytokine activity|cytokine activity|platelet-derived growth factor receptor binding|vascular endothelial growth factor receptor binding|protein binding|growth factor activity|growth factor activity|heparin binding|heparin binding|neuropilin binding|chemoattractant activity|identical protein binding|protein homodimerization activity|vascular endothelial growth factor receptor 1…	50.3767	46.2472	44.7852	0.0089939	0.38045	0.0030867	0.44832	0.47318	0.31268	0.035762	Rank1
CAPN10	calpain 10	cell|mitochondrion|cytosol|cytosol|plasma membrane|	proteolysis|cellular component disassembly involved in execution phase of apoptosis|actin cytoskeleton reorganization|positive regulation of insulin secretion|positive regulation of intracellular transport|cellular response to insulin stimulus|positive regulation of glucose import|type B pancreatic cell apoptotic process|positive regulation of type B pancreatic cell apoptotic process|	SNARE binding|calcium-dependent cysteine-type endopeptidase activity|cytoskeletal protein binding|	5.14943	5.15074	5.60037	0.0031292	0.2934	0.0483	0.54816	0.3782	0.39302	0.011935	Rank1
TTC14	tetratricopeptide repeat domain 14	None	None	RNA binding|	4.80764	5.4202	5.79124	0.047151	0.34825	0.072045	0.29729	0.47318	0.0018	0.039509	Rank1
EVPL	envoplakin	cornified envelope|cytoplasm|desmosome|extracellular vesicular exosome|	epidermis development|peptide cross-linking|keratinocyte differentiation|keratinization|	structural molecule activity|protein binding, bridging|	6.23158	7.7545	8.30384	0.049901	0.0074087	0.26757	0.074525	0.48998	0.0070325	0.24928	Rank3
PRDM4	PR domain containing 4	nucleus|	regulation of transcription, DNA-templated|transcription from RNA polymerase II promoter|signal transduction|cell proliferation|methylation|negative regulation of cell cycle|neurotrophin TRK receptor signaling pathway|	DNA binding|methyltransferase activity|zinc ion binding|	6.64489	6.66488	6.18108	0.031119	0.014153	0.19683	0.50096	0.45589	0.15025	0.0036598	Rank1
ANXA3	annexin A3	cytoplasm|plasma membrane|membrane|phagocytic vesicle membrane|specific granule|extracellular vesicular exosome|	phagocytosis|positive regulation of endothelial cell migration|defense response to bacterium|negative regulation of catalytic activity|neutrophil degranulation|positive regulation of angiogenesis|positive regulation of sequence-specific DNA binding transcription factor activity|	calcium ion binding|calcium-dependent phospholipid binding|phospholipase A2 inhibitor activity|calcium-dependent protein binding|	206.879	220.563	196.652	0.0089934	0.15475	0.023549	0.16543	0.25519	0.35535	0.0036593	Rank1
POLR2K	polymerase (RNA) II (DNA directed) polypeptide K, 7.0kDa	nucleus|nucleoplasm|DNA-directed RNA polymerase II, core complex|DNA-directed RNA polymerase III complex|DNA-directed RNA polymerase I complex|cytosol|	mRNA splicing, via spliceosome|DNA repair|transcription-coupled nucleotide-excision repair|nucleotide-excision repair|regulation of transcription from RNA polymerase I promoter|transcription from RNA polymerase I promoter|transcription initiation from RNA polymerase I promoter|transcription elongation from RNA polymerase I promoter|termination of RNA polymerase I transcription|transcription from …	RNA polymerase I activity|RNA polymerase II activity|RNA polymerase III activity|DNA binding|zinc ion binding|	44.9832	44.4119	35.1877	0.004289	0.038652	0.00048217	0.92058	0.44278	0.92961	0.14107	Rank3
SFPQ	splicing factor proline/glutamine-rich	None	None	None	87.6424	85.1484	93.9412	1.3086e-05	0.0014033	0.019422	0.92058	0.41552	0.93331	0.81965	Rank3
SIRPA	signal-regulatory protein alpha	plasma membrane|membrane|integral component of membrane|extracellular vesicular exosome|	cell adhesion|blood coagulation|leukocyte migration|	SH3 domain binding|	5.13219	5.90453	5.51657	0.042529	0.040591	0.19304	0.23157	0.84553	0.14474	0.010513	Rank1
COG7	component of oligomeric golgi complex 7	Golgi membrane|Golgi apparatus|Golgi transport complex|	protein glycosylation|intracellular protein transport|retrograde vesicle-mediated transport, Golgi to ER|protein localization to organelle|protein localization to Golgi apparatus|protein stabilization|	protein binding|	2.43653	2.54804	2.59362	0.025149	0.016143	0.24231	0.050749	0.022863	0.26292	0.053267	Rank3
RIOK1	RIO kinase 1	None	protein phosphorylation|	protein serine/threonine kinase activity|ATP binding|	21.9008	19.5184	20.3286	0.046088	0.1287	0.17989	0.25917	0.47742	0.0021546	0.038825	Rank1
SF3A2	splicing factor 3a, subunit 2, 66kDa	nucleoplasm|spliceosomal complex|small nuclear ribonucleoprotein complex|catalytic step 2 spliceosome|	mRNA 3'-splice site recognition|mRNA splicing, via spliceosome|mRNA splicing, via spliceosome|mRNA processing|RNA splicing|gene expression|	protein binding|zinc ion binding|poly(A) RNA binding|	66.4783	71.2135	70.1947	0.043526	0.016844	0.011814	0.90743	0.59011	0.88725	0.15888	Rank3
RFC1	replication factor C (activator 1) 1, 145kDa	nucleus|nucleoplasm|DNA replication factor C complex|Golgi apparatus|cell junction|extracellular vesicular exosome|	negative regulation of transcription from RNA polymerase II promoter|mitotic cell cycle|telomere maintenance via recombination|telomere maintenance|ATP catabolic process|DNA-dependent DNA replication|DNA strand elongation involved in DNA replication|DNA repair|transcription-coupled nucleotide-excision repair|nucleotide-excision repair|nucleotide-excision repair, DNA gap filling|transcription, DNA…	DNA binding|DNA clamp loader activity|double-stranded DNA binding|protein binding|ATP binding|enzyme activator activity|protein domain specific binding|sequence-specific DNA binding|	73.8933	67.8741	61.3491	0.010625	0.0033868	0.10906	0.17562	0.12224	0.91452	0.009812	Rank1
PHIP	pleckstrin homology domain interacting protein	nucleus|extracellular vesicular exosome|	regulation of protein phosphorylation|protein import into nucleus|cytoskeleton organization|positive regulation of cell proliferation|insulin receptor signaling pathway|positive regulation of peptidyl-threonine phosphorylation|regulation of cell morphogenesis|positive regulation of peptidyl-serine phosphorylation|regulation of growth|negative regulation of apoptotic process|positive regulation of…	insulin receptor binding|protein binding|lysine-acetylated histone binding|	3.06313	3.16226	2.71134	0.016301	0.044634	0.0087552	0.62025	0.53031	0.57984	0.071899	Rank3
SUB1	SUB1 homolog (S. cerevisiae)	nucleus|transcription factor complex|nucleolus|extracellular vesicular exosome|	transcription, DNA-templated|regulation of transcription from RNA polymerase II promoter|	single-stranded DNA binding|transcription coactivator activity|protein binding|poly(A) RNA binding|	427.973	430.075	364.868	0.011642	0.0045723	0.17451	0.31795	0.26949	0.65196	0.048146	Rank1
SETD3	SET domain containing 3	nuclear chromatin|	transcription, DNA-templated|histone H3-K36 methylation|peptidyl-lysine trimethylation|peptidyl-lysine monomethylation|peptidyl-lysine dimethylation|positive regulation of transcription, DNA-templated|positive regulation of transcription from RNA polymerase II promoter|positive regulation of muscle cell differentiation|histone H3-K4 methylation|	RNA polymerase II activating transcription factor binding|transcription coactivator activity|histone methyltransferase activity (H3-K4 specific)|histone methyltransferase activity (H3-K36 specific)|	23.9614	25.3981	23.4024	0.048838	0.43653	0.025619	0.44832	0.29335	0.89566	0.048937	Rank1
RPL36	ribosomal protein L36	nucleolus|cytoplasm|cytosol|membrane|cytosolic large ribosomal subunit|	nuclear-transcribed mRNA catabolic process, nonsense-mediated decay|translation|translation|translational initiation|translational elongation|translational termination|SRP-dependent cotranslational protein targeting to membrane|gene expression|viral process|RNA metabolic process|mRNA metabolic process|viral life cycle|viral transcription|cellular protein metabolic process|	structural constituent of ribosome|poly(A) RNA binding|	661.48	669.934	796.281	0.022929	0.093769	0.1089	0.31795	0.41552	0.037957	0.0056366	Rank1
ZNF100	zinc finger protein 100	nucleus|	transcription, DNA-templated|regulation of transcription, DNA-templated|	DNA binding|metal ion binding|	2.54792	2.60415	2.32527	0.046645	0.56023	0.026153	0.16426	0.18848	0.12832	0.0042654	Rank1
KBTBD2	kelch repeat and BTB (POZ) domain containing 2	None	None	None	10.2168	10.8769	10.2967	0.048837	0.16184	0.035029	0.43734	0.78258	0.1202	0.010513	Rank1
RIF1	replication timing regulatory factor 1	chromosome, telomeric region|female pronucleus|male pronucleus|nucleus|nucleolus|cytoplasm|spindle|plasma membrane|	cellular response to DNA damage stimulus|cell cycle|stem cell maintenance|	None	16.0832	15.374	14.0753	0.00468	0.0074082	0.21072	0.11385	0.3924	0.1202	0.0064562	Rank1
MPZL2	myelin protein zero-like 2	cytoskeleton|plasma membrane|integral component of membrane|	homophilic cell adhesion|anatomical structure morphogenesis|single organismal cell-cell adhesion|T cell differentiation in thymus|	protein binding|	6.15294	5.73076	5.4134	0.039686	0.32636	0.19683	0.066417	0.81556	0.0082708	0.0010451	Rank1
GTSE1	G-2 and S-phase expressed 1	cytoplasmic microtubule|membrane|	mitotic G2 phase|DNA damage response, signal transduction by p53 class mediator resulting in cell cycle arrest|microtubule-based process|	molecular_function|protein binding|	6.8053	7.37824	7.2601	0.035544	0.023229	0.45314	0.12713	0.53031	0.042961	0.050584	Rank3
EIF1B	eukaryotic translation initiation factor 1B	cellular_component|	translational initiation|regulation of translational initiation|	translation initiation factor activity|poly(A) RNA binding|	14.3454	16.4926	15.2338	0.019876	0.071037	0.048595	0.25758	0.23608	0.34598	0.036928	Rank1
COQ5	coenzyme Q5 homolog, methyltransferase (S. cerevisiae)	mitochondrion|	ubiquinone biosynthetic process|ubiquinone biosynthetic process|methylation|small molecule metabolic process|	methyltransferase activity|	33.1076	37.5438	44.1237	0.049901	0.020473	0.16155	0.77853	0.52833	0.51249	0.048146	Rank1
COPS8	COP9 signalosome subunit 8	nucleus|cytoplasm|COP9 signalosome|perinuclear region of cytoplasm|extracellular vesicular exosome|	activation of NF-kappaB-inducing kinase activity|negative regulation of cell proliferation|cullin deneddylation|	None	23.38	26.7994	24.6662	0.031449	0.0080168	0.7023	0.10849	0.29335	0.10231	0.014689	Rank1
NR2C2AP	nuclear receptor 2C2-associated protein	nucleoplasm|extracellular vesicular exosome|	transcription initiation from RNA polymerase II promoter|cell adhesion|gene expression|	protein binding|	23.1593	21.949	22.4686	0.0018816	0.0012709	0.097274	0.16543	0.10162	0.93331	0.0022527	Rank1
SLC7A6	solute carrier family 7 (amino acid transporter light chain, y+L system), member 6	plasma membrane|integral component of plasma membrane|basolateral plasma membrane|	amino acid transmembrane transport|protein complex assembly|cellular amino acid metabolic process|transport|ion transport|amino acid transport|blood coagulation|leukocyte migration|transmembrane transport|	amino acid transmembrane transporter activity|antiporter activity|	11.3443	11.3511	11.4386	0.0062371	0.68423	0.0063498	0.17562	0.14598	0.17805	0.0064562	Rank1
PABPN1	poly(A) binding protein, nuclear 1	nucleus|nucleoplasm|cytoplasm|ribonucleoprotein complex|	mRNA splicing, via spliceosome|transcription from RNA polymerase II promoter|termination of RNA polymerase II transcription|RNA processing|muscle contraction|RNA splicing|gene expression|poly(A)+ mRNA export from nucleus|modulation by virus of host morphology or physiology|modulation by virus of host process|viral life cycle|mRNA 3'-end processing|modification by virus of host mRNA processing|	nucleotide binding|RNA binding|protein binding|poly(A) RNA binding|	60.8939	65.1284	67.597	0.031808	0.022467	0.23307	0.2661	0.12224	0.68566	0.004541	Rank1
ATP6AP1	ATPase, H+ transporting, lysosomal accessory protein 1	vacuolar membrane|integral component of membrane|proton-transporting two-sector ATPase complex|proton-transporting V-type ATPase, V1 domain|extracellular vesicular exosome|	ATP hydrolysis coupled proton transport|proton transport|positive regulation of osteoblast differentiation|positive regulation of bone resorption|pH reduction|positive regulation of exocytosis|establishment of organelle localization|positive regulation of ERK1 and ERK2 cascade|positive regulation of osteoclast development|	transporter activity|ATP binding|Rab GTPase binding|proton-transporting ATP synthase activity, rotational mechanism|proton-transporting ATPase activity, rotational mechanism|	76.5738	92.9694	95.587	3.9772e-05	8.4933e-05	0.10052	0.47597	0.44278	0.12832	0.0036593	Rank1
DPH3	diphthamide biosynthesis 3	nucleus|cytoplasm|	peptidyl-diphthamide biosynthetic process from peptidyl-histidine|peptidyl-diphthamide biosynthetic process from peptidyl-histidine|negative regulation of protein secretion|positive regulation of binding|	protein binding|metal ion binding|	7.34139	8.62672	7.64869	0.00036154	0.036255	0.0075897	0.88346	0.41105	0.93855	0.23204	Rank3
DUSP12	dual specificity phosphatase 12	nucleus|cytoplasm|	cellular protein modification process|protein dephosphorylation|positive regulation of glucokinase activity|peptidyl-tyrosine dephosphorylation|peptidyl-tyrosine dephosphorylation|	protein tyrosine phosphatase activity|protein tyrosine/serine/threonine phosphatase activity|zinc ion binding|kinase binding|	9.4701	9.73876	11.218	0.00032921	0.0039929	0.041183	0.2661	0.27431	0.5031	0.1261	Rank3
TMEM237	transmembrane protein 237	membrane|integral component of membrane|ciliary transition zone|	regulation of Wnt signaling pathway|cilium assembly|	None	22.6713	23.9922	18.4554	0.041531	0.28275	0.019642	0.59821	0.42482	0.5052	0.0061057	Rank1
PRPF8	pre-mRNA processing factor 8	nucleus|nucleoplasm|U5 snRNP|membrane|nuclear speck|catalytic step 2 spliceosome|	RNA splicing, via transesterification reactions|mRNA splicing, via spliceosome|mRNA splicing, via spliceosome|mRNA processing|RNA splicing|gene expression|	protein binding|U6 snRNA binding|U5 snRNA binding|poly(A) RNA binding|	106.17	118.534	126.372	0.0035397	1.7962e-06	0.041732	0.60641	0.47108	0.56133	0.1546	Rank3
PSMD7	proteasome (prosome, macropain) 26S subunit, non-ATPase, 7	proteasome complex|nucleus|nucleoplasm|cytosol|proteasome regulatory particle|membrane|extracellular vesicular exosome|	G1/S transition of mitotic cell cycle|protein polyubiquitination|mitotic cell cycle|antigen processing and presentation of peptide antigen via MHC class I|antigen processing and presentation of exogenous peptide antigen via MHC class I, TAP-dependent|regulation of cellular amino acid metabolic process|apoptotic process|DNA damage response, signal transduction by p53 class mediator resulting in ce…	protein binding|	132.016	141.554	125.291	0.00058221	0.00015216	0.22109	0.16311	0.30278	0.05655	0.0022527	Rank1
FAM102B	family with sequence similarity 102, member B	None	None	None	3.24338	3.9616	3.41184	0.010745	0.0040683	0.086206	0.15204	0.10003	0.44536	0.010513	Rank1
SLC25A13	solute carrier family 25 (aspartate/glutamate carrier), member 13	mitochondrion|mitochondrial inner membrane|mitochondrial inner membrane|integral component of plasma membrane|	carbohydrate metabolic process|glucose metabolic process|gluconeogenesis|ATP biosynthetic process|transport|aspartate transport|L-glutamate transport|malate-aspartate shuttle|small molecule metabolic process|cellular respiration|response to calcium ion|transmembrane transport|	transporter activity|L-glutamate transmembrane transporter activity|calcium ion binding|L-aspartate transmembrane transporter activity|	7.50955	6.22416	7.11361	0.04715	0.28276	0.068664	0.010238	0.00095736	0.99699	0.052325	Rank3
COQ6	coenzyme Q6 monooxygenase	mitochondrion|Golgi apparatus|cell projection|	ubiquinone biosynthetic process|ubiquinone biosynthetic process|small molecule metabolic process|oxidation-reduction process|	oxidoreductase activity, acting on paired donors, with incorporation or reduction of molecular oxygen, NAD(P)H as one donor, and incorporation of one atom of oxygen|flavin adenine dinucleotide binding|	13.134	15.0371	14.4127	0.04558	0.13559	0.019422	0.061688	0.26471	0.11124	0.0070577	Rank1
RYBP	RING1 and YY1 binding protein	nucleoplasm|cytoplasm|PcG protein complex|	negative regulation of transcription from RNA polymerase II promoter|transcription, DNA-templated|apoptotic process|multicellular organismal development|histone H2A monoubiquitination|	DNA binding|transcription corepressor activity|protein binding|zinc ion binding|	8.59899	9.66883	8.3378	0.039686	0.011251	0.19397	0.48156	0.34996	0.79732	0.048146	Rank1
PHF14	PHD finger protein 14	None	None	zinc ion binding|	3.14469	3.27398	3.42958	0.017313	0.38329	0.014397	0.18614	0.13179	0.60682	0.048146	Rank1
DHX29	DEAH (Asp-Glu-Ala-His) box polypeptide 29	mitochondrion|eukaryotic 43S preinitiation complex|	ATP catabolic process|translational initiation|	translation initiation factor activity|ATP binding|ATP-dependent helicase activity|ribosomal small subunit binding|poly(A) RNA binding|	16.3036	16.1309	15.4228	0.018339	0.015068	0.036217	0.87503	0.48586	0.77645	0.73307	Rank3
UROD	uroporphyrinogen decarboxylase	cytosol|	porphyrin-containing compound metabolic process|protoporphyrinogen IX biosynthetic process|heme biosynthetic process|heme biosynthetic process|small molecule metabolic process|	uroporphyrinogen decarboxylase activity|uroporphyrinogen decarboxylase activity|	176.377	181.442	170.619	0.022929	0.035143	0.020063	0.92058	0.41552	0.92961	0.20622	Rank3
SPG7	spastic paraplegia 7 (pure and complicated autosomal recessive)	mitochondrion|integral component of membrane|mitochondrial membrane|	proteolysis|mitochondrion organization|nervous system development|anterograde axon cargo transport|cell death|	metalloendopeptidase activity|protein binding|ATP binding|peptidase activity|zinc ion binding|nucleoside-triphosphatase activity|unfolded protein binding|	119.594	135.819	148.046	0.039686	0.66448	0.081038	0.28529	0.24564	0.026302	0.011935	Rank1
RPL17-C18orf32	RPL17-C18orf32 readthrough	None	None	None	687.266	645.458	644.503	0.0019468	0.0005037	0.012317	0.91198	0.43379	0.9258	0.83077	Rank3
MCCC1	methylcrotonoyl-CoA carboxylase 1 (alpha)	mitochondrion|mitochondrial inner membrane|mitochondrial matrix|mitochondrial matrix|cytosol|	leucine catabolic process|leucine catabolic process|vitamin metabolic process|water-soluble vitamin metabolic process|biotin metabolic process|biotin metabolic process|branched-chain amino acid catabolic process|cellular nitrogen compound metabolic process|small molecule metabolic process|	biotin carboxylase activity|methylcrotonoyl-CoA carboxylase activity|methylcrotonoyl-CoA carboxylase activity|protein binding|ATP binding|biotin binding|metal ion binding|	12.6294	12.3934	11.9169	0.0014757	0.32192	0.019422	0.26443	0.12696	0.81442	0.011935	Rank1
NDUFS6	NADH dehydrogenase (ubiquinone) Fe-S protein 6, 13kDa (NADH-coenzyme Q reductase)	mitochondrial inner membrane|mitochondrial respiratory chain complex I|mitochondrial respiratory chain complex I|	mitochondrial electron transport, NADH to ubiquinone|fatty acid metabolic process|muscle contraction|multicellular organismal aging|respiratory electron transport chain|multicellular organism growth|cellular metabolic process|small molecule metabolic process|reproductive system development|mitochondrion morphogenesis|cardiovascular system development|	NADH dehydrogenase (ubiquinone) activity|electron carrier activity|	65.471	60.8263	79.5258	0.011642	0.016143	0.048911	0.73036	0.62109	0.45867	0.40492	Rank3
ATP6AP2	ATPase, H+ transporting, lysosomal accessory protein 2	plasma membrane|external side of plasma membrane|integral component of membrane|neuron projection|cell body|extracellular vesicular exosome|	angiotensin maturation|angiotensin maturation|proteolysis|cell death|rostrocaudal neural tube patterning|positive regulation of Wnt signaling pathway|positive regulation of transforming growth factor beta1 production|regulation of MAPK cascade|cellular protein metabolic process|eye pigmentation|head morphogenesis|	aspartic-type endopeptidase activity|receptor activity|protein binding|enzyme binding|	243.061	291.628	255.912	0.012272	0.014153	0.12736	0.56486	0.54202	0.34204	0.015227	Rank1
UBE2I	ubiquitin-conjugating enzyme E2I	synaptonemal complex|fibrillar center|nucleus|nucleoplasm|cytoplasm|PML body|dendrite|synapse|	negative regulation of transcription from RNA polymerase II promoter|cellular protein modification process|ubiquitin-dependent protein catabolic process|chromosome segregation|mitotic nuclear division|regulation of receptor activity|viral process|protein ubiquitination|protein sumoylation|protein sumoylation|protein sumoylation|positive regulation of intracellular steroid hormone receptor signali…	ubiquitin-protein transferase activity|protein binding|ATP binding|protein C-terminus binding|transcription factor binding|SUMO ligase activity|enzyme binding|HLH domain binding|bHLH transcription factor binding|poly(A) RNA binding|RING-like zinc finger domain binding|	163.789	175.918	169.699	0.00099277	0.06339	7.6983e-07	0.12251	0.082266	0.3647	0.0011267	Rank1
BMS1	BMS1 ribosome biogenesis factor	nucleus|nucleolus|nucleolus|	ribosome assembly|	ATP binding|poly(A) RNA binding|	9.75391	10.2747	10.1736	0.031119	0.50112	0.010597	0.23157	0.41552	0.032708	0.29684	Rank3
DNA2	DNA replication helicase/nuclease 2	nucleus|nucleoplasm|gamma DNA polymerase complex|mitochondrial nucleoid|	DNA replication checkpoint|mitotic cell cycle|telomere maintenance via recombination|telomere maintenance|DNA double-strand break processing|DNA catabolic process, endonucleolytic|ATP catabolic process|ATP catabolic process|DNA replication|mitochondrial DNA replication|DNA strand elongation involved in DNA replication|base-excision repair|telomere maintenance via semi-conservative replication|DNA…	DNA binding|DNA helicase activity|helicase activity|nuclease activity|protein binding|ATP binding|ATPase activity|site-specific endodeoxyribonuclease activity, specific for altered base|5'-flap endonuclease activity|5'-3' DNA helicase activity|single-stranded DNA-dependent ATPase activity|metal ion binding|4 iron, 4 sulfur cluster binding|	6.83943	6.58771	5.70031	0.000671	0.0010236	0.00020965	0.91847	0.41552	0.92961	0.81581	Rank3
KIF15	kinesin family member 15	centrosome|spindle|cytosol|plus-end kinesin complex|microtubule|membrane|	microtubule-based movement|mitotic nuclear division|blood coagulation|metabolic process|metabolic process|cell proliferation|antigen processing and presentation of exogenous peptide antigen via MHC class II|	DNA binding|motor activity|microtubule motor activity|ATP binding|microtubule binding|	14.6205	12.8808	10.7858	0.030464	0.03451	0.0067013	0.70913	0.63427	0.70182	0.13477	Rank3
TRRAP	transformation/transcription domain-associated protein	PCAF complex|Swr1 complex|nucleus|nucleoplasm|STAGA complex|transcription factor TFTC complex|NuA4 histone acetyltransferase complex|	chromatin organization|transcription, DNA-templated|regulation of transcription, DNA-templated|mitotic cell cycle checkpoint|histone acetylation|histone deubiquitination|histone H4 acetylation|histone H2A acetylation|	transcription cofactor activity|transcription coactivator activity|protein binding|phosphotransferase activity, alcohol group as acceptor|	11.3259	12.4991	13.6676	0.043034	0.16331	0.17778	0.0030425	0.097109	0.0011154	0.11189	Rank3
PSMD13	proteasome (prosome, macropain) 26S subunit, non-ATPase, 13	proteasome complex|nucleus|nucleoplasm|cytosol|proteasome regulatory particle|membrane|proteasome accessory complex|extracellular vesicular exosome|	G1/S transition of mitotic cell cycle|protein polyubiquitination|mitotic cell cycle|antigen processing and presentation of peptide antigen via MHC class I|antigen processing and presentation of exogenous peptide antigen via MHC class I, TAP-dependent|regulation of cellular amino acid metabolic process|apoptotic process|DNA damage response, signal transduction by p53 class mediator resulting in ce…	None	284.024	312.913	333.827	0.04558	0.60251	0.0013007	0.2661	0.4559	0.0020191	0.058228	Rank3
SRGAP2B	NA	NA	NA	NA	8.03826	9.76722	8.49079	0.035189	0.071038	0.014788	0.8434	0.48998	0.70466	0.048937	Rank1
CCT6A	chaperonin containing TCP1, subunit 6A (zeta 1)	acrosomal vesicle|zona pellucida receptor complex|cytoplasm|cytosol|chaperonin-containing T-complex|microtubule|cell body|extracellular vesicular exosome|	protein folding|binding of sperm to zona pellucida|cellular protein metabolic process|'de novo' posttranslational protein folding|	ATP binding|poly(A) RNA binding|unfolded protein binding|	438.064	467.312	489.344	0.011794	0.34825	0.0044632	0.22628	0.41105	0.11484	0.036927	Rank1
DHX37	DEAH (Asp-Glu-Ala-His) box polypeptide 37	None	metabolic process|	nucleic acid binding|helicase activity|ATP binding|	14.2939	14.6588	16.7492	0.0089939	0.0074087	0.25843	0.47327	0.42932	0.19936	0.0064562	Rank1
ATN1	atrophin 1	nucleus|cytoplasm|nuclear matrix|cell junction|perinuclear region of cytoplasm|	negative regulation of transcription from RNA polymerase II promoter|transcription, DNA-templated|central nervous system development|toxin metabolic process|cell migration|maintenance of cell polarity|neuron apoptotic process|	transcription corepressor activity|protein binding|protein domain specific binding|toxin receptor binding|	10.385	12.6523	13.769	0.017313	0.16788	0.016396	0.21487	0.16015	0.62654	0.039508	Rank1
TUBB	tubulin, beta class I	nucleus|nuclear envelope lumen|cytosol|cytoskeleton|microtubule|microtubule|cytoplasmic ribonucleoprotein granule|cell body|extracellular vesicular exosome|	G2/M transition of mitotic cell cycle|mitotic cell cycle|GTP catabolic process|cellular component movement|microtubule-based process|cellular process|cytoskeleton-dependent intracellular transport|natural killer cell mediated cytotoxicity|spindle assembly|protein polymerization|cell division|	GTPase activity|structural molecule activity|structural constituent of cytoskeleton|protein binding|GTP binding|protein domain specific binding|protein complex binding|GTPase activating protein binding|MHC class I protein binding|	980.743	979.77	958.903	1.206e-05	1.283e-06	0.035339	0.92564	0.42022	0.94807	0.058228	Rank3
SNRNP200	small nuclear ribonucleoprotein 200kDa (U5)	nucleus|nucleoplasm|spliceosomal complex|U5 snRNP|membrane|catalytic step 2 spliceosome|	cis assembly of pre-catalytic spliceosome|mRNA splicing, via spliceosome|mRNA splicing, via spliceosome|mRNA splicing, via spliceosome|osteoblast differentiation|ATP catabolic process|RNA splicing|gene expression|	ATP-dependent RNA helicase activity|protein binding|ATP binding|ATP-dependent helicase activity|identical protein binding|poly(A) RNA binding|	85.3952	95.9863	97.451	0.027406	0.81393	0.0029933	0.2134	0.41552	0.013315	0.27951	Rank3
BORA	bora, aurora kinase A activator	cytosol|	G2/M transition of mitotic cell cycle|mitotic cell cycle|mitotic nuclear division|regulation of mitosis|regulation of protein localization|regulation of mitotic spindle organization|	protein binding|protein kinase binding|	21.4216	21.9819	19.8894	0.0018816	0.66448	0.0013444	0.23313	0.1979	0.43522	0.010513	Rank1
TIMM13	translocase of inner mitochondrial membrane 13 homolog (yeast)	nucleolus|mitochondrion|mitochondrial inner membrane|mitochondrial intermembrane space protein transporter complex|	protein targeting to mitochondrion|sensory perception of sound|cellular protein metabolic process|chaperone-mediated protein transport|	zinc ion binding|	17.6162	15.4534	20.6894	0.0016425	0.003452	0.10567	0.56486	0.45157	0.32462	0.004541	Rank1
GJB2	gap junction protein, beta 2, 26kDa	endoplasmic reticulum-Golgi intermediate compartment|plasma membrane|connexon complex|integral component of membrane|lateral plasma membrane|	transport|cell-cell signaling|sensory perception of sound|gap junction assembly|male genitalia development|transmembrane transport|membrane organization|	gap junction channel activity|	17.2575	16.029	13.0826	0.014639	0.077318	0.0063493	0.94873	0.48998	0.92015	0.048146	Rank1
CWC15	CWC15 spliceosome-associated protein	nucleus|nucleus|spliceosomal complex|catalytic step 2 spliceosome|	mRNA splicing, via spliceosome|mRNA splicing, via spliceosome|	RNA binding|protein binding|	21.4158	20.3324	18.7171	0.0072917	0.026489	0.00029946	0.90857	0.41552	0.76978	0.18045	Rank3
ADCK5	aarF domain containing kinase 5	mitochondrion|integral component of membrane|	protein phosphorylation|	protein serine/threonine kinase activity|	4.46439	5.20198	5.61198	0.010745	0.016143	0.088044	0.68974	0.46898	0.38618	0.009812	Rank1
TP53BP1	tumor protein p53 binding protein 1	condensed chromosome kinetochore|chromosome, telomeric region|nucleus|nucleoplasm|replication fork|cytoplasm|	double-strand break repair via homologous recombination|DNA repair|double-strand break repair|transcription from RNA polymerase II promoter|cellular response to DNA damage stimulus|positive regulation of transcription, DNA-templated|positive regulation of transcription from RNA polymerase II promoter|positive regulation of sequence-specific DNA binding transcription factor activity|	RNA polymerase II activating transcription factor binding|RNA polymerase II transcription cofactor activity|p53 binding|damaged DNA binding|protein binding|methylated histone binding|telomeric DNA binding|	25.8131	30.2916	30.4093	0.02293	0.075546	0.026152	0.92851	0.46898	0.84547	0.048146	Rank1
NEDD8-MDP1	NEDD8-MDP1 readthrough	None	None	None	18.0675	18.162	18.3199	0.0054529	0.021725	0.021183	0.39866	0.24088	0.36315	0.1245	Rank3
POLR2J	polymerase (RNA) II (DNA directed) polypeptide J, 13.3kDa	nucleus|nucleoplasm|DNA-directed RNA polymerase II, core complex|	mRNA splicing, via spliceosome|DNA repair|transcription-coupled nucleotide-excision repair|nucleotide-excision repair|transcription from RNA polymerase II promoter|transcription from RNA polymerase II promoter|transcription initiation from RNA polymerase II promoter|transcription elongation from RNA polymerase II promoter|7-methylguanosine mRNA capping|RNA splicing|gene expression|viral process|p…	RNA polymerase II activity|DNA binding|DNA-directed RNA polymerase activity|protein binding|LRR domain binding|protein dimerization activity|	8.67657	8.50274	8.80774	0.0060374	0.004873	0.028021	0.91847	0.41552	0.92672	0.82344	Rank3
GTF3C5	general transcription factor IIIC, polypeptide 5, 63kDa	transcription factor TFIIIC complex|nucleoplasm|	transcription, DNA-templated|transcription from RNA polymerase III promoter|transcription from RNA polymerase III promoter|gene expression|skeletal muscle cell differentiation|5S class rRNA transcription from RNA polymerase III type 1 promoter|tRNA transcription from RNA polymerase III promoter|	DNA binding|protein binding|	43.8985	43.4122	41.6894	0.0052517	0.017892	0.0020998	0.57317	0.45589	0.42836	0.058228	Rank3
PPP2R1A	protein phosphatase 2, regulatory subunit A, alpha	protein phosphatase type 2A complex|protein phosphatase type 2A complex|chromosome, centromeric region|nucleus|mitochondrion|cytosol|microtubule cytoskeleton|membrane|	G2/M transition of mitotic cell cycle|nuclear-transcribed mRNA catabolic process, nonsense-mediated decay|inactivation of MAPK activity|mitotic cell cycle|regulation of DNA replication|regulation of transcription, DNA-templated|protein complex assembly|protein dephosphorylation|ceramide metabolic process|apoptotic process|chromosome segregation|mitotic nuclear envelope reassembly|RNA splicing|fib…	antigen binding|protein serine/threonine phosphatase activity|protein binding|protein phosphatase type 2A regulator activity|protein heterodimerization activity|	96.6123	110.723	108.464	0.0050742	0.027079	0.023549	0.90972	0.46898	0.91923	0.82344	Rank3
RPS14	ribosomal protein S14	nucleolus|mitochondrion|cytosol|membrane|cytosolic small ribosomal subunit|extracellular vesicular exosome|	ribosomal small subunit assembly|ribosomal small subunit assembly|negative regulation of transcription from RNA polymerase II promoter|nuclear-transcribed mRNA catabolic process, nonsense-mediated decay|translation|translation|translation|translational initiation|translational elongation|translational termination|regulation of translation|SRP-dependent cotranslational protein targeting to membran…	RNA binding|structural constituent of ribosome|poly(A) RNA binding|translation regulator activity|mRNA 5'-UTR binding|	2345.33	2439.62	2511.06	0.0004611	0.028558	0.0034989	0.92851	0.47742	0.93147	0.22773	Rank3
DDX23	DEAD (Asp-Glu-Ala-Asp) box polypeptide 23	nucleus|nucleoplasm|U5 snRNP|mitochondrion|plasma membrane|extracellular vesicular exosome|catalytic step 2 spliceosome|	cis assembly of pre-catalytic spliceosome|RNA splicing, via transesterification reactions|mRNA splicing, via spliceosome|mRNA splicing, via spliceosome|ATP catabolic process|RNA splicing|gene expression|	ATP-dependent RNA helicase activity|protein binding|ATP binding|poly(A) RNA binding|	84.4833	86.6152	103.754	0.029307	0.00038053	0.35275	0.16543	0.3358	0.039721	0.06982	Rank3
PPRC1	peroxisome proliferator-activated receptor gamma, coactivator-related 1	nucleus|	transcription, DNA-templated|regulation of transcription, DNA-templated|	nucleotide binding|poly(A) RNA binding|	13.2027	12.0062	12.9221	0.016301	0.019475	0.008572	0.89407	0.43379	0.88351	0.5466	Rank3
NIP7	NIP7, nucleolar pre-rRNA processing protein	nucleolus|	ribosome assembly|	protein binding|poly(A) RNA binding|	56.1951	56.6973	53.5426	0.0013977	0.035705	0.012147	0.90743	0.42932	0.91452	0.20622	Rank3
ELF2	E74-like factor 2 (ets domain transcription factor)	nucleus|nucleus|cytoplasm|	regulation of transcription from RNA polymerase II promoter|transcription from RNA polymerase II promoter|cell differentiation|negative regulation of transcription, DNA-templated|positive regulation of transcription, DNA-templated|	sequence-specific DNA binding RNA polymerase II transcription factor activity|sequence-specific DNA binding transcription factor activity|protein binding|sequence-specific DNA binding|sequence-specific DNA binding|	11.7984	13.3066	9.99293	0.04558	0.048843	0.49435	0.06289	0.25994	0.1496	0.010513	Rank1
NFYB	nuclear transcription factor Y, beta	nucleus|nucleoplasm|CCAAT-binding factor complex|	transcription, DNA-templated|regulation of transcription, DNA-templated|cellular lipid metabolic process|small molecule metabolic process|positive regulation of transcription, DNA-templated|	DNA binding|sequence-specific DNA binding transcription factor activity|protein binding|sequence-specific DNA binding|protein heterodimerization activity|repressing transcription factor binding|	15.3497	14.7701	14.2213	0.011228	0.0085577	0.018807	0.31287	0.15546	0.58989	0.053268	Rank3
TAF13	TAF13 RNA polymerase II, TATA box binding protein (TBP)-associated factor, 18kDa	nucleus|nucleoplasm|transcription factor TFIID complex|transcription factor TFIID complex|nucleolus|	DNA-templated transcription, initiation|regulation of transcription, DNA-templated|transcription from RNA polymerase II promoter|transcription from RNA polymerase II promoter|transcription initiation from RNA polymerase II promoter|transcription initiation from RNA polymerase II promoter|transcription elongation from RNA polymerase II promoter|gene expression|viral process|	DNA binding|sequence-specific DNA binding transcription factor activity|protein binding|protein C-terminus binding|protein heterodimerization activity|	34.0084	37.1778	39.6811	0.0054529	0.016541	0.003755	0.25917	0.43379	0.11484	0.19336	Rank3
CBX5	chromobox homolog 5	histone deacetylase complex|kinetochore|nucleus|nuclear envelope|nucleoplasm|nuclear heterochromatin|nucleolus|chromocenter|PML body|transcriptional repressor complex|nuclear centromeric heterochromatin|histone methyltransferase complex|	blood coagulation|viral process|negative regulation of transcription, DNA-templated|negative regulation of transcription, DNA-templated|	chromatin binding|protein binding|protein binding, bridging|methylated histone binding|protein homodimerization activity|histone deacetylase binding|repressing transcription factor binding|	18.5747	19.2498	20.4542	0.031809	0.043274	0.035812	0.98349	0.848	0.98476	0.1245	Rank3
ZNF7	zinc finger protein 7	nucleus|	transcription, DNA-templated|regulation of transcription, DNA-templated|multicellular organismal development|	DNA binding|sequence-specific DNA binding transcription factor activity|metal ion binding|	18.8524	19.7194	18.2209	0.049901	0.97282	0.001155	0.059748	0.057686	0.24129	0.0024287	Rank1
LARP4B	La ribonucleoprotein domain family, member 4B	nucleolus|cytoplasm|cytosol|cytoplasmic stress granule|membrane|polysomal ribosome|	positive regulation of translation|	poly(A) RNA binding|	14.3119	15.1067	14.7791	0.022929	0.0047083	0.3881	0.16426	0.16015	0.13935	0.0036598	Rank1
MED28	mediator complex subunit 28	membrane|mediator complex|cortical actin cytoskeleton|	transcription, DNA-templated|regulation of transcription, DNA-templated|stem cell maintenance|negative regulation of smooth muscle cell differentiation|	actin binding|protein binding|	12.5006	13.1778	11.4418	0.038343	0.0036947	0.35906	0.22316	0.022863	0.93331	0.058227	Rank3
UQCRQ	ubiquinol-cytochrome c reductase, complex III subunit VII, 9.5kDa	mitochondrion|mitochondrial inner membrane|respiratory chain|	subthalamus development|pons development|cerebellar Purkinje cell layer development|hippocampus development|thalamus development|hypothalamus development|pyramidal neuron development|respiratory electron transport chain|midbrain development|cellular metabolic process|small molecule metabolic process|hydrogen ion transmembrane transport|	ubiquinol-cytochrome-c reductase activity|	75.8588	88.7536	92.5649	9.9302e-05	0.029416	0.0033105	0.89907	0.48998	0.86451	0.10117	Rank3
FANCM	Fanconi anemia, complementation group M	nucleus|nucleoplasm|Fanconi anaemia nuclear complex|FANCM-MHF complex|	resolution of meiotic recombination intermediates|DNA repair|replication fork processing|nucleic acid phosphodiester bond hydrolysis|	DNA binding|chromatin binding|helicase activity|nuclease activity|protein binding|ATP binding|	6.00259	5.15252	4.91918	0.0042038	0.030363	0.19683	0.16543	0.1032	0.13687	0.0048571	Rank1
PELO	pelota homolog (Drosophila)	nucleus|cytoplasm|	cell cycle|cell proliferation|chromosome organization|cell division|nuclear-transcribed mRNA catabolic process, non-stop decay|nuclear-transcribed mRNA catabolic process, no-go decay|RNA surveillance|nucleic acid phosphodiester bond hydrolysis|	endonuclease activity|metal ion binding|	3.74283	3.65305	3.72833	0.012085	0.038652	0.01083	0.2661	0.11286	0.93504	0.14726	Rank3
BLM	Bloom syndrome, RecQ helicase-like	nuclear chromosome|chromosome, telomeric region|lateral element|male germ cell nucleus|nucleus|replication fork|nucleolus|cytoplasm|nuclear matrix|PML body|PML body|pronucleus|	regulation of cyclin-dependent protein serine/threonine kinase activity|mitotic G2 phase|telomere maintenance|double-strand break repair via homologous recombination|DNA double-strand break processing|DNA strand renaturation|ATP catabolic process|ATP catabolic process|DNA repair|DNA recombination|cellular response to DNA damage stimulus|cellular response to DNA damage stimulus|response to X-ray|r…	bubble DNA binding|p53 binding|single-stranded DNA binding|ATP-dependent DNA helicase activity|ATP-dependent DNA helicase activity|helicase activity|protein binding|ATP binding|ATP-dependent helicase activity|four-way junction helicase activity|ATPase activity|annealing helicase activity|ATP-dependent 3'-5' DNA helicase activity|G-quadruplex DNA binding|	28.5424	24.9897	23.1921	0.014835	0.017451	0.029336	0.55377	0.43379	0.094392	0.28824	Rank3
DYM	dymeclin	cytoplasm|Golgi apparatus|	Golgi organization|bone development|	protein binding|enzyme binding|	18.4867	16.6957	15.794	0.027406	0.2496	0.057701	0.06289	0.31217	0.025252	0.049732	Rank1
CLIP4	CAP-GLY domain containing linker protein family, member 4	None	None	None	14.5758	17.6637	13.4778	0.02681	0.0031092	0.55932	0.16196	0.26949	0.34848	0.012425	Rank1
IER3	immediate early response 3	nucleus|integral component of membrane|	response to protozoan|negative regulation of systemic arterial blood pressure|regulation of DNA repair|apoptotic process|mitotic G2 DNA damage checkpoint|intrinsic apoptotic signaling pathway in response to DNA damage|anatomical structure morphogenesis|negative regulation of apoptotic process|positive regulation of protein catabolic process|negative regulation of glycolytic process|regulation of …	protein binding|	144.917	164.25	164.502	0.02378	0.38045	0.011587	0.2661	0.57216	0.0064054	0.22773	Rank3
ATXN7L3	ataxin 7-like 3	SAGA complex|DUBm complex|	chromatin organization|transcription, DNA-templated|histone deubiquitination|positive regulation of transcription, DNA-templated|	transcription coactivator activity|protein binding|zinc ion binding|ligand-dependent nuclear receptor transcription coactivator activity|	24.1218	26.6399	26.4278	0.00020399	0.056897	0.01229	0.10096	0.1032	0.56815	0.00026609	Rank1
FAS	Fas cell surface death receptor	nucleus|cytoplasm|cytosol|plasma membrane|plasma membrane|plasma membrane|external side of plasma membrane|cell surface|integral component of membrane|death-inducing signaling complex|CD95 death-inducing signaling complex|membrane raft|extracellular vesicular exosome|	immunoglobulin production|renal system process|protein complex assembly|apoptotic process|apoptotic process|activation of cysteine-type endopeptidase activity involved in apoptotic process|activation-induced cell death of T cells|inflammatory cell apoptotic process|transformed cell apoptotic process|signal transduction|extrinsic apoptotic signaling pathway via death domain receptors|response to t…	signal transducer activity|receptor activity|transmembrane signaling receptor activity|protein binding|kinase binding|identical protein binding|	22.0997	20.895	15.5036	0.004366	0.10055	0.0013952	0.2661	0.1789	0.15924	0.024065	Rank1
RNASEK	ribonuclease, RNase K	cellular_component|integral component of membrane|	rRNA transcription|RNA phosphodiester bond hydrolysis, endonucleolytic|RNA phosphodiester bond hydrolysis, endonucleolytic|	endoribonuclease activity|	75.5158	71.0056	79.1184	0.0092721	0.00019937	0.23517	0.57317	0.48998	0.39648	0.0045415	Rank1
SETD5	SET domain containing 5	None	None	None	50.713	50.8993	44.9966	0.023171	0.0076376	0.40917	0.17688	0.12224	0.19827	0.0023409	Rank1
MRPS28	mitochondrial ribosomal protein S28	mitochondrion|mitochondrial small ribosomal subunit|	biological_process|	poly(A) RNA binding|	65.3855	64.6459	60.1904	0.02317	0.026089	0.29214	0.13248	0.018321	0.71727	0.099727	Rank3
SRF	serum response factor (c-fos serum response element-binding transcription factor)	nuclear chromatin|nucleus|cytoplasm|	patterning of blood vessels|response to hypoxia|mesoderm formation|neuron migration|trophectodermal cell differentiation|heart looping|morphogenesis of an epithelial sheet|cell migration involved in sprouting angiogenesis|positive regulation of transcription from RNA polymerase II promoter involved in myocardial precursor cell differentiation|transcription from RNA polymerase II promoter|cell-mat…	RNA polymerase II core promoter proximal region sequence-specific DNA binding|RNA polymerase II core promoter sequence-specific DNA binding transcription factor activity|RNA polymerase II transcription factor binding transcription factor activity|RNA polymerase II core promoter proximal region sequence-specific DNA binding transcription factor activity involved in positive regulation of transcrip…	2.7078	2.94903	3.35525	0.0192	0.043274	0.021183	0.61201	0.67185	0.51875	0.082919	Rank3
VOPP1	vesicular, overexpressed in cancer, prosurvival protein 1	endosome|cytoplasmic vesicle membrane|integral component of organelle membrane|	transcription, DNA-templated|regulation of transcription, DNA-templated|signal transduction|	signal transducer activity|	22.0997	21.8975	21.2689	0.017313	0.16636	0.010187	0.095334	0.14598	0.31399	0.011669	Rank1
MAP4K5	mitogen-activated protein kinase kinase kinase kinase 5	cytoplasm|plasma membrane|	protein phosphorylation|activation of JUN kinase activity|intracellular signal transduction|	protein kinase activity|protein serine/threonine kinase activity|small GTPase regulator activity|protein binding|ATP binding|	8.79351	9.15505	8.03535	0.016898	0.12165	0.041731	0.33665	0.60747	0.053318	0.013756	Rank1
CENPT	centromere protein T	chromosome, centromeric region|kinetochore|condensed chromosome kinetochore|nucleus|cytoplasm|cytosol|nuclear membrane|	mitotic cell cycle|mitotic cell cycle|chromosome segregation|mitotic nuclear division|chromosome organization|kinetochore assembly|	DNA binding|protein binding|protein heterodimerization activity|	13.9961	14.4905	14.9857	0.016301	0.026088	0.037322	0.60368	0.44278	0.45647	0.15888	Rank3
BTN2A2	butyrophilin, subfamily 2, member A2	integral component of membrane|extracellular vesicular exosome|	negative regulation of cellular metabolic process|negative regulation of activated T cell proliferation|negative regulation of cytokine secretion|	None	5.82237	7.56547	6.28846	0.006741	0.060031	0.0048291	0.72777	0.47108	0.4915	0.01608	Rank1
DNAJB2	DnaJ (Hsp40) homolog, subfamily B, member 2	proteasome complex|nucleus|cytosol|inclusion body|	protein folding|response to unfolded protein|cell death|negative regulation of cell proliferation|negative regulation of cell growth|ER-associated ubiquitin-dependent protein catabolic process|positive regulation of protein ubiquitination|positive regulation of proteasomal ubiquitin-dependent protein catabolic process|protein refolding|negative regulation of inclusion body assembly|negative regul…	protein binding|Hsp70 protein binding|polyubiquitin binding|unfolded protein binding|chaperone binding|proteasome binding|	17.5212	20.3563	20.8236	0.00086652	0.1408	0.02912	0.059747	0.15072	0.039351	0.09342	Rank3
MAN1A2	mannosidase, alpha, class 1A, member 2	Golgi membrane|nucleolus|Golgi apparatus|membrane|integral component of membrane|extracellular vesicular exosome|	N-glycan processing|respiratory gaseous exchange|protein N-linked glycosylation via asparagine|post-translational protein modification|cellular protein metabolic process|lung alveolus development|	mannosyl-oligosaccharide 1,2-alpha-mannosidase activity|calcium ion binding|	7.66742	9.15202	8.96183	0.011228	0.036254	0.097274	0.59262	0.47742	0.34598	0.0064562	Rank1
TMEM69	transmembrane protein 69	integral component of membrane|	None	None	6.527	6.8131	5.51005	0.010625	0.00038053	0.27651	0.63147	0.57942	0.15025	0.012425	Rank1
ZNF131	zinc finger protein 131	nucleus|	regulation of transcription, DNA-templated|regulation of transcription from RNA polymerase II promoter|transcription from RNA polymerase II promoter|transcription from RNA polymerase II promoter|	sequence-specific DNA binding RNA polymerase II transcription factor activity|DNA binding|sequence-specific DNA binding transcription factor activity|metal ion binding|	28.1383	30.1543	27.1311	0.0098468	0.12747	0.19785	0.006486	0.0066214	0.57984	0.10874	Rank3
SPRTN	SprT-like N-terminal domain	nucleus|chromosome|nuclear speck|	cellular response to DNA damage stimulus|response to UV|translesion synthesis|translesion synthesis|positive regulation of protein ubiquitination|	DNA binding|protein binding|ubiquitin binding|metal ion binding|K63-linked polyubiquitin binding|	5.12278	5.55874	5.35188	0.0098463	0.021725	0.00304	0.54265	0.62608	0.5542	0.058228	Rank3
FHOD1	formin homology 2 domain containing 1	stress fiber|nucleus|cytoplasm|membrane|bleb|	positive regulation of transcription from RNA polymerase II promoter|positive regulation of stress fiber assembly|	actin binding|protein binding|identical protein binding|	5.17926	5.89818	5.90304	0.0010241	0.0047088	0.002573	0.47327	0.41552	0.41709	0.10714	Rank3
SRM	spermidine synthase	cytosol|	polyamine metabolic process|spermidine biosynthetic process|spermidine biosynthetic process|cellular nitrogen compound metabolic process|small molecule metabolic process|	spermidine synthase activity|protein homodimerization activity|	32.4371	28.5469	32.2422	0.0051589	0.017892	0.016396	0.64254	0.71157	0.36063	0.1261	Rank3
HK2	hexokinase 2	mitochondrial outer membrane|cytosol|membrane|	cellular glucose homeostasis|carbohydrate metabolic process|glucose metabolic process|glycolytic process|lactation|apoptotic mitochondrial changes|hexose transport|glucose transport|small molecule metabolic process|regulation of glucose import|carbohydrate phosphorylation|glucose 6-phosphate metabolic process|transmembrane transport|	glucokinase activity|hexokinase activity|ATP binding|glucose binding|fructokinase activity|mannokinase activity|	8.59833	6.52158	7.25224	0.0043655	0.0085582	0.0033588	0.60368	0.48998	0.41337	0.064544	Rank3
RPGRIP1L	RPGRIP1-like	cytoplasm|centrosome|cell-cell junction|tight junction|cilium|axoneme|ciliary basal body|	in utero embryonic development|kidney development|liver development|establishment or maintenance of cell polarity|determination of left/right symmetry|regulation of smoothened signaling pathway|neural tube patterning|cerebellum development|lateral ventricle development|olfactory bulb development|corpus callosum development|embryonic forelimb morphogenesis|embryonic hindlimb morphogenesis|cilium a…	protein binding|thromboxane A2 receptor binding|	8.87422	8.45191	7.35487	0.0056454	0.84312	0.0011971	0.28529	0.28859	0.15236	0.040204	Rank1
UHRF1	NA	NA	NA	NA	91.1227	91.9489	99.4988	0.00023632	0.00013574	0.035812	0.93408	0.4646	0.93331	0.050584	Rank3
WDR92	WD repeat domain 92	None	apoptotic process|histone lysine methylation|	protein binding|methylated histone binding|	5.82257	6.22931	7.00443	0.0033109	0.03133	0.038955	0.98537	0.54202	0.99509	0.29684	Rank3
COG4	component of oligomeric golgi complex 4	Golgi membrane|Golgi transport complex|	retrograde vesicle-mediated transport, Golgi to ER|Golgi organization|protein transport|Golgi vesicle prefusion complex stabilization|	protein binding|	60.171	65.511	60.9781	0.0018821	0.8363	7.262e-05	0.23156	0.4559	0.026302	0.058228	Rank3
CNOT1	CCR4-NOT transcription complex, subunit 1	cytoplasmic mRNA processing body|cytoplasmic mRNA processing body|extracellular space|nucleus|peroxisomal membrane|cytosol|membrane|CCR4-NOT complex|	negative regulation of transcription from RNA polymerase II promoter|nuclear-transcribed mRNA catabolic process, deadenylation-dependent decay|nuclear-transcribed mRNA poly(A) tail shortening|transcription, DNA-templated|regulation of translation|multicellular organismal development|gene expression|positive regulation of cytoplasmic mRNA processing body assembly|RNA metabolic process|mRNA metabol…	poly(A)-specific ribonuclease activity|protein binding|estrogen receptor binding|retinoic acid receptor binding|poly(A) RNA binding|	100.665	98.0861	98.1346	0.0011072	0.0036111	0.21382	0.35056	0.43831	0.027772	0.10117	Rank3
POMT2	protein-O-mannosyltransferase 2	endoplasmic reticulum membrane|integral component of membrane|	protein O-linked mannosylation|	dolichyl-phosphate-mannose-protein mannosyltransferase activity|metal ion binding|	12.3943	14.7481	14.7385	0.0010703	0.0085582	0.0054357	0.60368	0.80267	0.45981	0.09342	Rank3
CTSV	cathepsin V	extracellular region|microvillus|external side of plasma membrane|neuron projection|lysosomal lumen|perikaryon|extracellular vesicular exosome|	proteolysis|spermatogenesis|cellular response to starvation|response to glucose|multicellular organismal aging|antigen processing and presentation of exogenous peptide antigen via MHC class II|nerve development|extracellular matrix disassembly|extracellular matrix organization|response to gonadotropin|decidualization|autophagic cell death|response to glucocorticoid|Sertoli cell differentiation|	aminopeptidase activity|cysteine-type endopeptidase activity|cysteine-type peptidase activity|kininogen binding|protein complex binding|peptide binding|	37.5385	39.9029	37.771	0.00021374	0.029416	0.042348	0.41235	0.85136	0.39648	0.092	Rank3
PDP1	pyruvate dehyrogenase phosphatase catalytic subunit 1	mitochondrial matrix|	pyruvate metabolic process|regulation of acetyl-CoA biosynthetic process from pyruvate|peptidyl-threonine dephosphorylation|cellular metabolic process|small molecule metabolic process|	protein serine/threonine phosphatase activity|[pyruvate dehydrogenase (lipoamide)] phosphatase activity|metal ion binding|	420.261	441.437	409.109	0.00012958	1.283e-06	0.37682	0.37903	0.43831	0.14249	0.010254	Rank1
COPS2	COP9 signalosome subunit 2	cytoplasm|COP9 signalosome|	negative regulation of transcription from RNA polymerase II promoter|transcription from RNA polymerase II promoter|signal transduction|cell proliferation|cullin deneddylation|neuron differentiation|skeletal muscle cell differentiation|	transcription corepressor activity|signal transducer activity|protein binding|	131.299	124.317	121.828	2.566e-07	0.0013048	0.00068027	0.90743	0.42482	0.92961	0.82344	Rank3
TCEAL8	transcription elongation factor A (SII)-like 8	nucleus|	transcription, DNA-templated|regulation of transcription, DNA-templated|	None	32.5932	35.7721	33.3145	0.16393	0.28693	0.19785	0.015787	0.14598	0.022151	0.00283	Rank2
WWC1	WW and C2 domain containing 1	nucleus|cytoplasm|cytosol|cytosol|ruffle membrane|protein complex|perinuclear region of cytoplasm|	negative regulation of transcription from RNA polymerase II promoter|transcription, DNA-templated|cell migration|establishment of cell polarity|regulation of intracellular transport|hippo signaling|regulation of hippo signaling|negative regulation of hippo signaling|positive regulation of MAPK cascade|negative regulation of organ growth|	transcription coactivator activity|protein binding|kinase binding|protein binding, bridging|protein complex scaffold|	20.4648	20.6812	20.9215	0.51339	0.26462	0.88055	0.029961	0.017519	0.25505	0.039509	Rank2
DDB2	damage-specific DNA binding protein 2, 48kDa	nucleoplasm|Cul4B-RING E3 ubiquitin ligase complex|protein complex|	protein polyubiquitination|nucleotide-excision repair, DNA damage removal|DNA repair|nucleotide-excision repair|pyrimidine dimer repair|response to UV|histone H2A monoubiquitination|protein autoubiquitination|UV-damage excision repair|	DNA binding|damaged DNA binding|ubiquitin-protein transferase activity|protein binding|	34.9522	31.9462	30.1741	0.44076	0.94979	0.33317	0.029271	0.010389	0.51875	0.0039005	Rank2
PAQR4	progestin and adipoQ receptor family member IV	integral component of membrane|	None	receptor activity|	11.9365	12.2912	13.3095	0.061745	0.38045	0.051604	0.0265	0.018321	0.052848	0.01469	Rank2
SPTY2D1	SPT2, Suppressor of Ty, domain containing 1 (S. cerevisiae)	cellular_component|	biological_process|	molecular_function|	7.22713	7.0559	6.58864	0.26243	0.29874	0.40917	0.042063	0.04569	0.12832	0.0091648	Rank2
MON2	MON2 homolog (S. cerevisiae)	trans-Golgi network|	Golgi to endosome transport|protein transport|vesicle-mediated transport|actin cytoskeleton organization|positive regulation of GTPase activity|	ARF guanyl-nucleotide exchange factor activity|protein binding|	8.72862	9.31333	7.68108	0.52666	0.2496	0.61775	0.041691	0.13646	0.0063012	0.037533	Rank2
AP5Z1	adaptor-related protein complex 5, zeta 1 subunit	nucleus|cytoplasm|AP-type membrane coat adaptor complex|AP-5 adaptor complex|	double-strand break repair via homologous recombination|cell death|protein transport|endosomal transport|	protein binding|	5.39822	5.42308	6.46843	0.25033	0.32419	0.56085	0.0057577	0.0075123	0.99283	0.037534	Rank2
SYTL2	synaptotagmin-like 2	nucleus|cytoplasm|Golgi apparatus|plasma membrane|membrane|extrinsic component of plasma membrane|melanosome|exocytic vesicle|	intracellular protein transport|exocytosis|vesicle docking involved in exocytosis|negative regulation of phosphatase activity|vesicle-mediated transport|	phosphatidylserine binding|protein binding|phosphatidylinositol-4,5-bisphosphate binding|Rab GTPase binding|phosphatase binding|neurexin family protein binding|	4.77064	8.73985	8.63136	0.14381	0.6814	0.052703	0.032261	0.01039	0.52077	0.048146	Rank2
FAM171A2	family with sequence similarity 171, member A2	integral component of membrane|	None	None	2.27717	2.60401	3.22241	0.16393	0.24363	0.10235	0.0037558	0.0019868	0.30598	0.0045415	Rank2
MRI1	methylthioribose-1-phosphate isomerase 1	nucleolus|cytoplasm|cytoplasm|cytosol|cell projection|	sulfur amino acid metabolic process|polyamine metabolic process|L-methionine biosynthetic process from S-adenosylmethionine|L-methionine salvage from methylthioadenosine|L-methionine salvage from methylthioadenosine|L-methionine salvage from methylthioadenosine|cellular nitrogen compound metabolic process|small molecule metabolic process|	identical protein binding|S-methyl-5-thioribose-1-phosphate isomerase activity|	2.3386	2.77925	2.95795	0.15789	0.16636	0.10235	0.038898	0.0054683	0.74446	0.0030276	Rank2
CCNDBP1	cyclin D-type binding-protein 1	nucleus|cytoplasm|	cell cycle|regulation of cell cycle|	protein binding|	32.8689	36.679	31.9575	0.44667	0.18493	0.9629	0.042064	0.015259	0.39302	0.011935	Rank2
TUBA1B	tubulin, alpha 1b	microtubule|microtubule|cytoplasmic microtubule|extracellular vesicular exosome|	microtubule cytoskeleton organization|GTP catabolic process|protein folding|microtubule-based process|cytoskeleton-dependent intracellular transport|cellular protein metabolic process|'de novo' posttranslational protein folding|protein polymerization|cell division|cellular response to interleukin-4|	double-stranded RNA binding|GTPase activity|structural molecule activity|structural constituent of cytoskeleton|protein binding|GTP binding|	1249.29	1202.84	1101.72	0.073291	0.49273	0.10235	0.032261	0.018321	0.14855	0.048146	Rank2
ING5	inhibitor of growth family, member 5	nucleus|nucleoplasm|MOZ/MORF histone acetyltransferase complex|	DNA replication|chromatin organization|transcription, DNA-templated|protein acetylation|negative regulation of cell proliferation|negative regulation of cell proliferation|positive regulation of apoptotic process|histone H3 acetylation|positive regulation of transcription, DNA-templated|negative regulation of growth|positive regulation of apoptotic signaling pathway|	chromatin binding|protein binding|zinc ion binding|methylated histone binding|	11.236	11.6377	14.6216	0.13944	0.10621	0.5334	0.028908	0.37355	0.0029085	0.0036598	Rank2
RBM12B	RNA binding motif protein 12B	None	None	nucleotide binding|protein binding|poly(A) RNA binding|	13.5578	14.4663	13.9656	0.22995	0.5067	0.15818	0.0066584	0.01039	0.19545	0.0070571	Rank2
TPD52L2	tumor protein D52-like 2	cytoplasm|perinuclear region of cytoplasm|	regulation of cell proliferation|	protein binding|protein homodimerization activity|poly(A) RNA binding|protein heterodimerization activity|	186.137	188.342	181.351	0.37466	0.27334	0.13315	0.012862	0.0090021	0.16132	0.039508	Rank2
RIPK2	receptor-interacting serine-threonine kinase 2	cytoplasm|cytosol|cytoskeleton|vesicle|protein complex|	activation of MAPK activity|positive regulation of cytokine-mediated signaling pathway|toll-like receptor signaling pathway|adaptive immune response|MyD88-dependent toll-like receptor signaling pathway|MyD88-independent toll-like receptor signaling pathway|positive regulation of T-helper 1 type immune response|apoptotic process|inflammatory response|signal transduction|I-kappaB kinase/NF-kappaB s…	protein serine/threonine kinase activity|non-membrane spanning protein tyrosine kinase activity|signal transducer activity|protein binding|ATP binding|LIM domain binding|protein homodimerization activity|CARD domain binding|CARD domain binding|	12.6804	13.1998	13.036	0.33397	0.49833	0.22309	0.027366	0.1032	0.024495	0.011669	Rank2
NUP50	nucleoporin 50kDa	nucleus|nuclear pore|nucleoplasm|nuclear membrane|	mitotic cell cycle|carbohydrate metabolic process|mitotic nuclear envelope disassembly|hexose transport|regulation of glucose transport|protein transport|glucose transport|viral process|cytokine-mediated signaling pathway|small molecule metabolic process|intracellular transport|mRNA transport|transmembrane transport|	protein binding|	70.5283	69.2446	72.4104	0.18826	0.12625	0.32399	0.039631	0.029525	0.52384	0.048146	Rank2
TRIM56	tripartite motif containing 56	cytoplasm|cytosol|	regulation of type I interferon production|positive regulation of type I interferon production|interferon-beta production|response to type I interferon|innate immune response|defense response to virus|protein K63-linked ubiquitination|	ubiquitin-protein transferase activity|ubiquitin-protein transferase activity|zinc ion binding|ligase activity|poly(A) RNA binding|	2.01362	2.59081	2.65285	0.23558	0.30503	0.32711	0.0056171	0.0033457	0.65904	0.012425	Rank2
SBF1	SET binding factor 1	nucleus|integral component of membrane|	protein dephosphorylation|spermatogenesis|cell death|positive regulation of Rab GTPase activity|	protein tyrosine/serine/threonine phosphatase activity|Rab guanyl-nucleotide exchange factor activity|	9.32246	10.2423	12.0005	0.33237	0.1408	0.89172	0.015787	0.045689	0.26292	0.010513	Rank2
TRNP1	TMF1-regulated nuclear protein 1	nucleus|nuclear euchromatin|	transcription, DNA-templated|regulation of transcription, DNA-templated|cell cycle|cerebellar cortex morphogenesis|regulation of cell proliferation|regulation of cell cycle|neural precursor cell proliferation|	DNA binding|	7.95506	7.56588	8.18832	0.050457	0.32192	0.051976	0.015045	0.016002	0.81911	0.011669	Rank2
DENND1A	DENN/MADD domain containing 1A	cell junction|clathrin-coated vesicle|dendrite|clathrin-coated vesicle membrane|presynaptic membrane|neuronal cell body|	endocytosis|protein transport|regulation of Rab protein signal transduction|positive regulation of Rab GTPase activity|synaptic vesicle endocytosis|	Rab guanyl-nucleotide exchange factor activity|SH3 domain binding|	7.39564	6.92615	6.83761	0.24683	0.09377	0.43025	0.012862	0.0099146	0.16795	0.015227	Rank2
RANBP9	RAN binding protein 9	nucleus|cytosol|microtubule associated complex|	protein complex assembly|microtubule nucleation|axon guidance|	protein binding|Ran GTPase binding|enzyme binding|	8.74708	8.93019	8.4291	0.24683	0.20661	0.59463	0.025361	0.022863	0.11124	0.01469	Rank2
TTI1	TELO2 interacting protein 1	cytoplasm|TORC1 complex|TORC2 complex|	regulation of TOR signaling|	protein binding|	12.033	11.5965	12.1012	0.11674	0.10621	0.5075	0.010563	0.0009163	0.15753	0.049732	Rank2
TGFBRAP1	transforming growth factor, beta receptor associated protein 1	cytoplasm|membrane|	regulation of transcription, DNA-templated|intracellular protein transport|signal transduction|transforming growth factor beta receptor signaling pathway|vesicle-mediated transport|regulation of catalytic activity|	small GTPase regulator activity|transforming growth factor beta receptor binding|protein binding|SMAD binding|	3.99122	4.07559	4.31415	0.096558	0.11605	0.22604	0.039631	0.0094419	0.29158	0.0037773	Rank2
ATP13A2	ATPase type 13A2	lysosome|lysosomal membrane|integral component of membrane|	ATP catabolic process|cation transport|cell death|	protein binding|ATP binding|cation-transporting ATPase activity|metal ion binding|	21.5341	22.0612	23.9893	0.22491	0.62792	0.18076	0.038899	0.038103	0.52699	0.037533	Rank2
ZFP36	ZFP36 ring finger protein	nucleus|cytoplasm|cytosol|cytosol|cytoplasmic stress granule|	negative regulation of transcription from RNA polymerase II promoter|nuclear-transcribed mRNA catabolic process, deadenylation-dependent decay|mRNA catabolic process|gene expression|RNA metabolic process|mRNA metabolic process|regulation of tumor necrosis factor production|negative regulation of translation involved in gene silencing by miRNA|response to starvation|positive regulation of nuclear-…	DNA binding|single-stranded RNA binding|mRNA binding|protein binding|AU-rich element binding|AU-rich element binding|protein kinase binding|C-C chemokine binding|poly(A) RNA binding|metal ion binding|14-3-3 protein binding|	9.49267	10.8002	10.6225	0.45245	0.7009	0.11503	0.0074251	0.0075123	0.54559	0.049732	Rank2
EDC3	enhancer of mRNA decapping 3	cytoplasmic mRNA processing body|cytosol|membrane|	nuclear-transcribed mRNA catabolic process, deadenylation-dependent decay|gene expression|RNA metabolic process|mRNA metabolic process|exonucleolytic nuclear-transcribed mRNA catabolic process involved in deadenylation-dependent decay|	RNA binding|protein binding|identical protein binding|	38.1143	39.222	38.9248	0.12708	0.15331	0.05731	8.8012e-05	1.8731e-05	0.078433	0.0011262	Rank2
PIGO	phosphatidylinositol glycan anchor biosynthesis, class O	endoplasmic reticulum membrane|membrane|integral component of membrane|	C-terminal protein lipidation|GPI anchor biosynthetic process|preassembly of GPI anchor in ER membrane|post-translational protein modification|cellular protein metabolic process|	molecular_function|transferase activity|	5.79981	6.4861	5.92505	0.096558	0.8363	0.068664	0.039631	0.0090016	0.33677	0.010513	Rank2
EED	embryonic ectoderm development	sex chromatin|nucleus|nucleus|nucleoplasm|cytoplasm|ESC/E(Z) complex|pronucleus|	regulation of gene expression by genetic imprinting|transcription, DNA-templated|histone methylation|negative regulation of transcription, DNA-templated|positive regulation of histone H3-K27 methylation|	chromatin binding|protein binding|histone methyltransferase activity|identical protein binding|	47.4186	47.8605	39.643	0.074103	0.077317	0.24387	0.027366	0.40645	0.002246	0.0023414	Rank2
EIF2AK4	eukaryotic translation initiation factor 2 alpha kinase 4	cytosolic ribosome|	regulation of translational initiation|protein phosphorylation|cellular response to starvation|negative regulation of translation|endoplasmic reticulum unfolded protein response|regulation of translational initiation in response to stress|	protein serine/threonine kinase activity|eukaryotic translation initiation factor 2alpha kinase activity|ATP binding|protein homodimerization activity|	18.6522	20.3573	19.1876	0.20775	0.24363	0.43517	0.0043182	0.3358	0.00027635	0.011669	Rank2
CBX3	chromobox homolog 3	condensed chromosome, centromeric region|chromatin|nucleus|nuclear envelope|nuclear inner membrane|nuclear euchromatin|nuclear heterochromatin|spindle|nuclear centromeric heterochromatin|	chromatin remodeling|transcription, DNA-templated|negative regulation of transcription, DNA-templated|negative regulation of transcription, DNA-templated|rhythmic process|	protein binding|enzyme binding|protein domain specific binding|identical protein binding|histone methyltransferase binding|	466.265	440.331	403.629	0.12113	0.12388	0.44535	0.01109	0.0099146	0.12322	0.0030276	Rank2
DOT1L	DOT1-like histone H3K79 methyltransferase	nucleus|	histone lysine methylation|histone lysine methylation|regulation of JAK-STAT cascade|regulation of transcription regulatory region DNA binding|	DNA binding|protein binding|transcription factor binding|histone-lysine N-methyltransferase activity|	3.56744	3.40128	3.78712	0.80297	0.66165	0.85664	0.0062181	0.0082067	0.051815	0.040204	Rank2
UPF1	UPF1 regulator of nonsense transcripts homolog (yeast)	chromatin|cytoplasmic mRNA processing body|nucleus|cytoplasm|cytosol|exon-exon junction complex|supraspliceosomal complex|	nuclear-transcribed mRNA catabolic process, nonsense-mediated decay|nuclear-transcribed mRNA catabolic process, nonsense-mediated decay|nuclear-transcribed mRNA catabolic process, nonsense-mediated decay|nuclear-transcribed mRNA catabolic process, nonsense-mediated decay|nuclear-transcribed mRNA catabolic process|ATP catabolic process|DNA replication|DNA repair|mRNA export from nucleus|regulation…	DNA binding|chromatin binding|RNA binding|ATP-dependent RNA helicase activity|helicase activity|protein binding|ATP binding|zinc ion binding|poly(A) RNA binding|	31.8091	31.3377	38.1492	0.14132	0.12997	0.2609	0.040932	0.0109	0.75857	0.048146	Rank2
TAF5L	TAF5-like RNA polymerase II, p300/CBP-associated factor (PCAF)-associated factor, 65kDa	STAGA complex|transcription factor TFTC complex|	chromatin organization|regulation of transcription, DNA-templated|transcription from RNA polymerase II promoter|histone H3 acetylation|	sequence-specific DNA binding transcription factor activity|transcription coactivator activity|histone acetyltransferase activity|	5.30133	5.35902	5.37253	0.078837	0.10621	0.1016	0.015045	0.0051086	0.051816	0.0013638	Rank2
ACADSB	acyl-CoA dehydrogenase, short/branched chain	mitochondrion|mitochondrial matrix|extracellular vesicular exosome|	fatty acid metabolic process|branched-chain amino acid catabolic process|cellular nitrogen compound metabolic process|small molecule metabolic process|oxidation-reduction process|	acyl-CoA dehydrogenase activity|flavin adenine dinucleotide binding|	10.7687	10.0576	9.44724	0.15311	0.14351	0.53496	0.010563	0.022863	0.096761	0.038824	Rank2
SMG5	SMG5 nonsense mediated mRNA decay factor	nucleus|cytoplasm|cytosol|	nuclear-transcribed mRNA catabolic process, nonsense-mediated decay|mRNA export from nucleus|gene expression|RNA metabolic process|mRNA metabolic process|regulation of dephosphorylation|	protein binding|protein phosphatase 2A binding|	5.21129	5.67547	5.56831	0.24568	0.47302	0.56575	0.04169	0.26949	0.00025018	0.0029301	Rank2
ARF1	ADP-ribosylation factor 1	Golgi membrane|cytosol|plasma membrane|postsynaptic density|sarcomere|cell junction|neuron projection|postsynaptic membrane|perinuclear region of cytoplasm|extracellular vesicular exosome|	regulation of receptor internalization|GTP catabolic process|phospholipid metabolic process|phosphatidylinositol biosynthetic process|cellular copper ion homeostasis|retrograde vesicle-mediated transport, Golgi to ER|post-Golgi vesicle-mediated transport|small GTPase mediated signal transduction|protein transport|viral process|antigen processing and presentation of exogenous peptide antigen via M…	GTPase activity|receptor signaling protein activity|protein binding|GTP binding|poly(A) RNA binding|	417.06	450.932	442.9	0.088184	0.25299	0.035812	0.031293	0.060932	0.56511	0.0085382	Rank2
WBP1L	WW domain binding protein 1-like	integral component of membrane|	None	None	4.8104	6.37393	5.70208	0.43326	0.29874	0.5054	0.048772	0.1979	0.025741	0.01469	Rank2
DDX31	DEAD (Asp-Glu-Ala-Asp) box polypeptide 31	nucleus|nucleolus|	ATP catabolic process|	ATP binding|ATP-dependent helicase activity|poly(A) RNA binding|	11.7016	10.7378	11.9215	0.70888	0.94794	0.41791	0.0057583	0.04569	0.1131	0.010254	Rank2
UBXN2B	UBX domain protein 2B	nucleus|endoplasmic reticulum|Golgi apparatus|cytosol|	None	None	6.62199	5.79042	6.62439	0.72611	0.73526	0.11292	0.041691	0.0079609	0.051816	0.010254	Rank2
TNFSF12	tumor necrosis factor (ligand) superfamily, member 12	extracellular space|extracellular space|integral component of plasma membrane|perinuclear region of cytoplasm|	angiogenesis|positive regulation of endothelial cell proliferation|apoptotic process|immune response|signal transduction|cell differentiation|endothelial cell migration|positive regulation of angiogenesis|apoptotic signaling pathway|positive regulation of extrinsic apoptotic signaling pathway|	receptor binding|cytokine activity|cytokine activity|tumor necrosis factor receptor binding|protein binding|	3.10472	4.59348	4.77995	0.10853	0.19572	0.22699	0.015787	0.1032	0.044473	0.0036598	Rank2
KLHL21	kelch-like family member 21	cytoplasm|polar microtubule|Cul3-RING ubiquitin ligase complex|	mitotic nuclear division|protein ubiquitination|protein ubiquitination|regulation of cytokinesis|chromosome passenger complex localization to spindle midzone|	ubiquitin-protein transferase activity|	9.13475	8.94319	11.3281	0.13148	0.82165	0.053702	0.010946	0.0099146	0.41438	0.014689	Rank2
P2RX4	purinergic receptor P2X, ligand-gated ion channel, 4	integral component of nuclear inner membrane|lysosomal membrane|plasma membrane|integral component of plasma membrane|integral component of plasma membrane|membrane|cell junction|perinuclear region of cytoplasm|extracellular vesicular exosome|	tissue homeostasis|regulation of sodium ion transport|transport|cation transport|signal transduction|regulation of blood pressure|positive regulation of calcium ion transport into cytosol|positive regulation of calcium ion transport into cytosol|negative regulation of cardiac muscle hypertrophy|sensory perception of pain|positive regulation of prostaglandin secretion|response to ATP|ion transmemb…	purinergic nucleotide receptor activity|purinergic nucleotide receptor activity|extracellular ATP-gated cation channel activity|receptor binding|copper ion binding|ATP binding|zinc ion binding|protein homodimerization activity|cadherin binding|	6.42851	7.37331	5.97856	0.30598	0.21761	0.27087	0.041292	0.021856	0.19097	0.0062863	Rank2
MRS2	MRS2 magnesium transporter	mitochondrial inner membrane|integral component of membrane|	magnesium ion transport|	magnesium ion transmembrane transporter activity|	29.5762	28.704	29.526	0.18387	0.63351	0.25051	0.01079	0.0062494	0.23418	0.010954	Rank2
IFT22	N/A	None	None	None	22.4862	21.1603	20.9238	0.25864	0.058459	0.88304	0.014416	0.0082067	0.052848	0.0036593	Rank2
ARHGAP27	Rho GTPase activating protein 27	intracellular|cytoplasm|membrane|	receptor-mediated endocytosis|signal transduction|positive regulation of Rac GTPase activity|positive regulation of Cdc42 GTPase activity|	SH3 domain binding|Rac GTPase activator activity|	7.47155	8.45324	9.19264	0.20291	0.4112	0.19036	0.0074923	0.01526	0.13509	0.015227	Rank2
MST1R	macrophage stimulating 1 receptor (c-met-related tyrosine kinase)	stress fiber|integral component of plasma membrane|	cellular component movement|defense response|signal transduction|transmembrane receptor protein tyrosine kinase signaling pathway|multicellular organismal development|single fertilization|positive regulation of cell proliferation|response to virus|peptidyl-tyrosine phosphorylation|macrophage colony-stimulating factor signaling pathway|positive regulation of MAP kinase activity|innate immune respo…	macrophage colony-stimulating factor receptor activity|protein binding|ATP binding|enzyme binding|	9.61278	11.1868	10.3007	0.52308	0.21388	0.97043	0.0029988	0.00088448	0.44977	0.011669	Rank2
G3BP1	GTPase activating protein (SH3 domain) binding protein 1	nucleus|cytoplasm|cytosol|plasma membrane|cytoplasmic stress granule|	ATP catabolic process|transport|Ras protein signal transduction|DNA duplex unwinding|negative regulation of canonical Wnt signaling pathway|nucleic acid phosphodiester bond hydrolysis|	DNA binding|mRNA binding|ATP-dependent DNA helicase activity|ATP-dependent RNA helicase activity|endonuclease activity|protein binding|ATP binding|poly(A) RNA binding|	1003.62	1122.7	972.361	0.89366	0.63632	0.6194	0.001604	0.0014695	0.064785	0.038824	Rank2
WFS1	Wolfram syndrome 1 (wolframin)	endoplasmic reticulum|endoplasmic reticulum membrane|integral component of endoplasmic reticulum membrane|dendrite|	kidney development|renal water homeostasis|ER overload response|ER overload response|activation of signaling protein activity involved in unfolded protein response|visual perception|sensory perception of sound|protein maturation by protein folding|ER-associated ubiquitin-dependent protein catabolic process|endoplasmic reticulum unfolded protein response|endoplasmic reticulum unfolded protein resp…	transporter activity|calmodulin binding|ubiquitin protein ligase binding|activating transcription factor binding|calcium-dependent protein binding|ATPase binding|	16.8047	18.7953	22.3469	0.078837	0.74532	0.22604	0.0070556	0.057686	0.042101	0.014061	Rank2
TMCO3	transmembrane and coiled-coil domains 3	integral component of membrane|	hydrogen ion transmembrane transport|	solute:proton antiporter activity|	33.3557	35.4383	38.0476	0.078837	0.19572	0.28227	0.0057583	0.0090016	0.051815	0.011669	Rank2
SUPT20H	suppressor of Ty 20 homolog (S. cerevisiae)	SAGA complex|SAGA-type complex|	chromatin organization|autophagy|gastrulation|regulation of RNA biosynthetic process|	transcription cofactor activity|protein binding|	18.9013	21.8776	19.1606	0.064996	0.38045	0.21777	0.0055679	0.23608	0.00091579	0.012963	Rank2
DYRK1A	dual-specificity tyrosine-(Y)-phosphorylation regulated kinase 1A	nucleus|nucleoplasm|nuclear speck|ribonucleoprotein complex|	mitotic cell cycle|protein phosphorylation|nervous system development|circadian rhythm|peptidyl-serine phosphorylation|peptidyl-threonine phosphorylation|peptidyl-tyrosine phosphorylation|peptidyl-tyrosine phosphorylation|negative regulation of DNA damage response, signal transduction by p53 class mediator|protein autophosphorylation|positive regulation of protein deacetylation|	protein kinase activity|protein serine/threonine kinase activity|protein serine/threonine/tyrosine kinase activity|protein tyrosine kinase activity|non-membrane spanning protein tyrosine kinase activity|protein binding|ATP binding|protein self-association|tau protein binding|	18.7691	22.0319	21.5858	0.14381	0.51507	0.22109	0.003667	0.015259	0.26292	0.0068488	Rank2
ZNF609	zinc finger protein 609	nucleus|	None	metal ion binding|	3.40418	3.61478	3.47531	0.30147	0.82916	0.20178	0.0034725	0.040207	0.15924	0.0083083	Rank2
TP53I11	tumor protein p53 inducible protein 11	integral component of membrane|	response to stress|negative regulation of cell proliferation|	None	18.4399	20.4241	19.8639	0.55716	0.83101	0.34986	0.0021182	0.10806	3.1561e-05	0.0039	Rank2
IRF2	interferon regulatory factor 2	nucleoplasm|cytosol|	negative regulation of transcription from RNA polymerase II promoter|transcription, DNA-templated|regulation of transcription, DNA-templated|blood coagulation|cell proliferation|cytokine-mediated signaling pathway|interferon-gamma-mediated signaling pathway|type I interferon signaling pathway|	regulatory region DNA binding|DNA binding|sequence-specific DNA binding transcription factor activity|protein binding|	5.61824	6.04418	4.34154	0.33397	0.89069	0.23077	0.0020653	0.23608	8.9808e-06	0.012425	Rank2
SMPD4	sphingomyelin phosphodiesterase 4, neutral membrane (neutral sphingomyelinase-3)	Golgi membrane|endoplasmic reticulum|endoplasmic reticulum membrane|Golgi apparatus|trans-Golgi network|integral component of membrane|	sphingolipid metabolic process|sphingomyelin catabolic process|glycosphingolipid metabolic process|small molecule metabolic process|glycerophospholipid catabolic process|ceramide biosynthetic process|cellular response to tumor necrosis factor|	sphingomyelin phosphodiesterase activity|metal ion binding|sphingomyelin phosphodiesterase D activity|	108.75	110.95	113.715	0.59207	0.76466	0.3566	0.00010289	2.5916e-05	0.20732	0.0064562	Rank2
REPS1	RALBP1 associated Eps domain containing 1	plasma membrane|coated pit|	receptor-mediated endocytosis|	calcium ion binding|protein binding|SH3 domain binding|	26.332	26.7689	27.7477	0.081844	0.0085577	0.43143	0.061689	0.0109	0.65618	0.01608	Rank2
DCP1A	NA	NA	NA	NA	6.69536	7.62354	7.02562	0.19212	0.039288	0.2098	0.076432	0.037052	0.28233	0.014689	Rank2
LAGE3	L antigen family, member 3	cellular_component|nucleus|	tRNA processing|biological_process|	molecular_function|	11.4474	12.1713	16.7313	0.05339	0.81393	0.0054352	0.074524	0.01526	0.70754	0.0036598	Rank2
PCBP1	poly(rC) binding protein 1	nucleoplasm|cytoplasm|membrane|ribonucleoprotein complex|extracellular vesicular exosome|	mRNA splicing, via spliceosome|RNA splicing|gene expression|	single-stranded DNA binding|RNA binding|protein binding|poly(A) RNA binding|	42.7421	44.087	39.8013	0.050457	0.090769	0.017404	0.059298	0.021856	0.92769	0.0036593	Rank2
BMP4	bone morphogenetic protein 4	extracellular region|extracellular region|proteinaceous extracellular matrix|extracellular space|	negative regulation of transcription from RNA polymerase II promoter|activation of MAPKK activity|osteoblast differentiation|ureteric bud development|branching involved in ureteric bud morphogenesis|kidney development|mesonephros development|neural tube closure|positive regulation of protein phosphorylation|positive regulation of endothelial cell proliferation|endochondral ossification|blood vess…	cytokine activity|protein binding|growth factor activity|heparin binding|chemoattractant activity|BMP receptor binding|	51.7727	79.964	79.219	0.22623	0.039923	0.86289	0.18614	0.016002	0.61467	0.0036593	Rank2
PGPEP1	pyroglutamyl-peptidase I	cytosol|	proteolysis|	cysteine-type peptidase activity|	4.00788	3.50217	4.08954	0.065708	0.67858	0.0026988	0.091867	0.037052	0.52384	0.011669	Rank2
SUPT5H	suppressor of Ty 5 homolog (S. cerevisiae)	nucleus|nucleoplasm|DSIF complex|	negative regulation of transcription from RNA polymerase II promoter|chromatin remodeling|DNA-templated transcription, elongation|transcription from RNA polymerase II promoter|transcription elongation from RNA polymerase II promoter|transcription elongation from RNA polymerase II promoter|7-methylguanosine mRNA capping|cell cycle|response to organic substance|gene expression|viral process|positiv…	chromatin binding|protein binding|enzyme binding|poly(A) RNA binding|protein heterodimerization activity|	111.49	120.585	133.616	0.33397	0.44779	0.17989	0.051869	0.020019	0.011663	0.0076483	Rank2
PSMC3IP	PSMC3 interacting protein	cellular_component|nucleus|	DNA recombination|meiotic nuclear division|regulation of RNA biosynthetic process|	DNA binding|ligand-dependent nuclear receptor transcription coactivator activity|	24.1051	25.7698	25.8522	0.064996	0.0077438	0.60123	0.073188	0.48586	0.0038759	0.014373	Rank2
PUS3	pseudouridylate synthase 3	nucleus|	tRNA pseudouridine synthesis|	RNA binding|pseudouridine synthase activity|	5.91252	5.19251	5.85876	0.11216	0.029416	0.097274	0.28176	0.89126	0.033027	0.038824	Rank2
SIPA1	signal-induced proliferation-associated 1	nucleus|cytosol|membrane|transport vesicle|protein complex|perinuclear region of cytoplasm|	cytoskeleton organization|negative regulation of cell adhesion|signal transduction|cell proliferation|negative regulation of cell growth|positive regulation of Rap GTPase activity|intracellular signal transduction|cellular response to water deprivation|positive regulation of GTPase activity|negative regulation of cell cycle|	GTPase activator activity|protein binding|protein C-terminus binding|Rap GTPase activator activity|	11.7909	13.9779	14.5683	0.065708	0.015849	0.31983	0.43185	0.46898	0.022843	0.035762	Rank2
RSPH3	radial spoke 3 homolog (Chlamydomonas)	None	None	None	3.16707	3.2771	2.64681	0.14049	0.033454	0.59463	0.16426	0.69498	0.026755	0.048146	Rank2
EIF3C	NA	NA	NA	NA	495.155	442.935	459.035	0.18387	0.0016178	0.61614	0.078358	0.42932	4.2338e-05	0.0091648	Rank2
EIF3CL	eukaryotic translation initiation factor 3, subunit C-like	eukaryotic translation initiation factor 3 complex|eukaryotic 43S preinitiation complex|eukaryotic 48S preinitiation complex|	formation of translation preinitiation complex|regulation of translational initiation|	translation initiation factor activity|translation initiation factor binding|	133.332	119.684	120.715	0.063083	0.090769	0.044958	0.076432	0.051142	0.010889	0.0036593	Rank2
LSG1	large 60S subunit nuclear export GTPase 1	nucleus|cytoplasm|endoplasmic reticulum|cytosol|Cajal body|membrane|	GTP catabolic process|GTP catabolic process|protein transport|ribosome biogenesis|nuclear export|	GTPase activity|GTPase activity|GTP binding|	13.4564	13.4218	13.1347	0.06917	0.1287	0.035812	0.073188	0.06433	0.0045256	0.00052166	Rank2
CHEK1	checkpoint kinase 1	chromosome, telomeric region|chromatin|condensed nuclear chromosome|extracellular space|nucleus|nucleoplasm|replication fork|centrosome|cytosol|intracellular membrane-bounded organelle|	DNA damage checkpoint|DNA damage checkpoint|G2/M transition of mitotic cell cycle|DNA replication|DNA repair|cellular response to DNA damage stimulus|DNA damage induced protein phosphorylation|regulation of double-strand break repair via homologous recombination|regulation of transcription from RNA polymerase II promoter in response to UV-induced DNA damage|peptidyl-threonine phosphorylation|G2 D…	protein serine/threonine kinase activity|protein binding|ATP binding|histone kinase activity (H3-T11 specific)|	111.415	108.18	93.5137	0.14132	0.82164	0.0067013	0.18335	0.28859	0.018831	0.011669	Rank2
STYXL1	serine/threonine/tyrosine interacting-like 1	None	protein dephosphorylation|intracellular signal transduction|	protein tyrosine/serine/threonine phosphatase activity|	15.0939	18.6467	18.5956	0.088906	0.1905	0.032025	0.10096	0.28859	0.011314	0.0030271	Rank2
CSTF1	cleavage stimulation factor, 3' pre-RNA, subunit 1, 50kDa	nucleus|nucleoplasm|	mRNA splicing, via spliceosome|transcription from RNA polymerase II promoter|termination of RNA polymerase II transcription|mRNA polyadenylation|mRNA cleavage|RNA processing|RNA splicing|gene expression|mRNA 3'-end processing|	RNA binding|protein binding|poly(A) RNA binding|	22.9495	24.3548	20.9263	0.00031638	0.80988	0.0060927	0.54545	0.41105	0.41709	0.81772	Rank3
ASAH1	N-acylsphingosine amidohydrolase (acid ceramidase) 1	lysosomal lumen|extracellular vesicular exosome|	sphingolipid metabolic process|ceramide metabolic process|glycosphingolipid metabolic process|cell death|response to organic substance|lung development|small molecule metabolic process|	catalytic activity|ceramidase activity|	270.015	293.983	270.547	0.004289	0.017892	0.1633	0.81788	0.41552	0.81535	0.056223	Rank3
ANKMY2	ankyrin repeat and MYND domain containing 2	cilium|	None	metal ion binding|	22.7573	26.7706	22.3951	0.036691	0.5067	0.042706	0.29729	0.11751	0.25505	0.1261	Rank3
TM2D3	TM2 domain containing 3	integral component of membrane|	None	None	28.0162	30.3427	26.4566	0.029307	0.005903	0.86166	0.53719	0.31682	0.58401	0.28824	Rank3
RINL	Ras and Rab interactor-like	ruffle|actin cytoskeleton|cytoplasmic membrane-bounded vesicle|	endocytosis|protein transport|positive regulation of GTPase activity|positive regulation of GTPase activity|	guanyl-nucleotide exchange factor activity|GTPase activator activity|	3.15573	3.09945	3.18014	0.016301	0.0077438	0.51105	0.75293	0.63427	0.34598	0.18475	Rank3
RAB14	RAB14, member RAS oncogene family	Golgi membrane|intracellular|lysosome|lysosomal membrane|early endosome|late endosome|rough endoplasmic reticulum|Golgi stack|cytosol|plasma membrane|trans-Golgi network transport vesicle|cytoplasmic vesicle membrane|phagocytic vesicle membrane|early endosome membrane|nuclear outer membrane-endoplasmic reticulum membrane network|intracellular membrane-bounded organelle|phagocytic vesicle|perinucl…	GTP catabolic process|GTP catabolic process|GTP catabolic process|Golgi to endosome transport|Golgi to endosome transport|small GTPase mediated signal transduction|fibroblast growth factor receptor signaling pathway|embryo development|protein transport|vesicle-mediated transport|endocytic recycling|regulation of protein localization|intracellular transport|membrane organization|	GTPase activity|GTPase activity|GTPase activity|protein binding|GTP binding|GDP binding|	16.4055	16.8245	13.9919	0.0056448	0.0078803	0.21777	0.94007	0.42022	0.92961	0.85655	Rank3
EBPL	emopamil binding protein-like	endoplasmic reticulum|endoplasmic reticulum membrane|integral component of membrane|	sterol metabolic process|	cholestenol delta-isomerase activity|	69.1029	63.7517	70.2705	0.047151	0.044635	0.080595	0.2661	0.27903	0.66049	0.3012	Rank3
ELMOD3	ELMO/CED-12 domain containing 3	cytoplasm|cytoskeleton|stereocilium|kinocilium|	phagocytosis|	None	3.11408	2.92754	3.00506	0.032849	0.94013	0.041183	0.44557	0.26949	0.87016	0.94958	Rank3
MSH6	mutS homolog 6	nuclear chromosome|nuclear chromatin|nucleus|cytoplasm|Golgi apparatus|plasma membrane|MutSalpha complex|intracellular membrane-bounded organelle|	meiotic mismatch repair|meiotic mismatch repair|ATP catabolic process|ATP catabolic process|DNA repair|mismatch repair|mismatch repair|mismatch repair|reciprocal meiotic recombination|determination of adult lifespan|intrinsic apoptotic signaling pathway in response to DNA damage|intrinsic apoptotic signaling pathway in response to DNA damage|response to UV|response to UV|somatic hypermutation of …	magnesium ion binding|four-way junction DNA binding|chromatin binding|double-stranded DNA binding|protein binding|protein binding|ATP binding|DNA-dependent ATPase activity|ATPase activity|mismatched DNA binding|mismatched DNA binding|guanine/thymine mispair binding|single guanine insertion binding|single thymine insertion binding|oxidized purine DNA binding|MutLalpha complex binding|methylated hi…	98.4431	87.664	86.9452	0.027407	0.005903	0.19683	0.62865	0.3782	0.61603	0.76495	Rank3
NAT14	N-acetyltransferase 14 (GCN5-related, putative)	nucleus|integral component of membrane|	DNA-templated transcription, initiation|positive regulation of transcription, DNA-templated|	DNA binding|N-acetyltransferase activity|	14.6103	18.7338	19.2257	0.0084587	0.039288	0.10235	0.19429	0.12224	0.6292	0.086664	Rank3
GRB2	growth factor receptor-bound protein 2	nucleus|cytoplasm|endosome|Golgi apparatus|cytosol|plasma membrane|COP9 signalosome|vesicle membrane|extracellular vesicular exosome|Grb2-EGFR complex|	epidermal growth factor receptor signaling pathway|Ras protein signal transduction|cell-cell signaling|axon guidance|aging|blood coagulation|insulin receptor signaling pathway|insulin receptor signaling pathway|fibroblast growth factor receptor signaling pathway|positive regulation of signal transduction|positive regulation of signal transduction|viral process|platelet activation|positive regulat…	phosphotyrosine binding|SH3/SH2 adaptor activity|epidermal growth factor receptor binding|neurotrophin TRKA receptor binding|protein binding|SH3 domain binding|protein kinase binding|protein phosphatase binding|identical protein binding|insulin receptor substrate binding|poly(A) RNA binding|ephrin receptor binding|	101.835	117.441	121.093	0.012085	0.15475	0.010323	0.6925	0.81556	0.32567	0.13477	Rank3
C6orf62	chromosome 6 open reading frame 62	intracellular|	biological_process|	molecular_function|	26.6365	28.433	25.6671	0.0052517	0.017892	0.061529	0.91198	0.59886	0.81911	0.10117	Rank3
PC	pyruvate carboxylase	mitochondrion|mitochondrial inner membrane|mitochondrial matrix|cytosol|	carbohydrate metabolic process|glucose metabolic process|pyruvate metabolic process|gluconeogenesis|gluconeogenesis|oxaloacetate metabolic process|lipid metabolic process|vitamin metabolic process|water-soluble vitamin metabolic process|biotin metabolic process|small molecule metabolic process|	DNA binding|biotin carboxylase activity|pyruvate carboxylase activity|protein binding|ATP binding|biotin binding|metal ion binding|	8.23361	10.2078	8.98859	0.036691	0.040591	0.64968	0.85011	0.85623	0.25175	0.73565	Rank3
CD81	CD81 molecule	immunological synapse|plasma membrane|integral component of plasma membrane|membrane|vesicle|extracellular vesicular exosome|	activation of MAPK activity|phosphatidylinositol biosynthetic process|protein localization|cell proliferation|positive regulation of cell proliferation|positive regulation of 1-phosphatidylinositol 4-kinase activity|phosphatidylinositol metabolic process|viral entry into host cell|receptor-mediated virion attachment to host cell|positive regulation of peptidyl-tyrosine phosphorylation|regulation …	protein binding|MHC class II protein complex binding|	264.308	277.341	291.241	0.0019468	0.036859	0.086206	0.3741	0.3782	0.3647	0.21915	Rank3
MAGED2	melanoma antigen family D, 2	membrane|	None	None	42.6378	53.4578	48.7871	0.018758	0.0085582	0.86915	0.58703	0.47318	0.28113	0.27951	Rank3
RAB5B	RAB5B, member RAS oncogene family	intracellular|endosome|plasma membrane|membrane|endocytic vesicle|early endosome membrane|melanosome|extracellular vesicular exosome|	GTP catabolic process|endosome organization|small GTPase mediated signal transduction|protein transport|antigen processing and presentation|regulation of endocytosis|	GTPase activity|protein binding|GTP binding|GDP binding|GTP-dependent protein binding|	13.0229	16.0166	13.5116	0.0079557	0.00041235	0.44669	0.92754	0.43379	0.94807	0.19763	Rank3
GAA	glucosidase, alpha; acid	lysosome|lysosomal membrane|membrane|extracellular vesicular exosome|	maltose metabolic process|regulation of the force of heart contraction|diaphragm contraction|heart morphogenesis|glycogen catabolic process|sucrose metabolic process|glucose metabolic process|lysosome organization|locomotory behavior|tissue development|vacuolar sequestering|muscle cell cellular homeostasis|neuromuscular process controlling posture|neuromuscular process controlling balance|cardiac…	alpha-glucosidase activity|carbohydrate binding|maltose alpha-glucosidase activity|	17.487	21.7529	22.1252	0.049901	0.5574	0.04891	0.79375	0.54202	0.73058	0.26216	Rank3
NDUFB1	NADH dehydrogenase (ubiquinone) 1 beta subcomplex, 1, 7kDa	mitochondrial inner membrane|mitochondrial respiratory chain complex I|mitochondrial respiratory chain complex I|integral component of membrane|extracellular vesicular exosome|	mitochondrial electron transport, NADH to ubiquinone|respiratory electron transport chain|cellular metabolic process|small molecule metabolic process|	NADH dehydrogenase (ubiquinone) activity|	106.691	109.613	118.721	0.0076771	0.063389	0.224	0.40347	0.43155	0.15516	0.011669	Rank1
LIMD1	LIM domains containing 1	cytoplasmic mRNA processing body|nucleus|cytoplasm|adherens junction|focal adhesion|RISC complex|	response to hypoxia|osteoblast development|transcription, DNA-templated|regulation of transcription, DNA-templated|cytoskeleton organization|signal transduction|multicellular organismal development|regulation of cell shape|phosphorylation|cell migration|cytoplasmic mRNA processing body assembly|gene silencing by miRNA|negative regulation of hippo signaling|negative regulation of osteoblast differ…	transcription corepressor activity|protein binding|zinc ion binding|	2.85874	2.55141	2.59703	0.010625	0.0085577	0.81366	0.75532	0.56092	0.34848	0.5466	Rank3
FANCG	Fanconi anemia, complementation group G	nucleoplasm|nucleolus|cytoplasm|mitochondrion|plasma membrane|Fanconi anaemia nuclear complex|	cell cycle checkpoint|ovarian follicle development|DNA repair|mitochondrion organization|spermatid development|response to radiation|	damaged DNA binding|protein binding|	12.8899	13.9997	14.8495	0.04715	0.13559	0.11586	0.31795	0.26949	0.63059	0.011669	Rank1
GTF2E1	general transcription factor IIE, polypeptide 1, alpha 56kDa	nucleus|nucleoplasm|intermediate filament cytoskeleton|	regulation of transcription, DNA-templated|transcription from RNA polymerase II promoter|transcription initiation from RNA polymerase II promoter|transcription elongation from RNA polymerase II promoter|gene expression|viral process|	protein binding|sequence-specific DNA binding|metal ion binding|	10.6293	11.1413	11.381	0.02293	0.10055	0.035513	0.33666	0.42482	0.42735	0.14107	Rank3
TMED7	transmembrane emp24 protein transport domain containing 7	endoplasmic reticulum|endoplasmic reticulum membrane|endoplasmic reticulum-Golgi intermediate compartment|Golgi apparatus|integral component of membrane|COPI vesicle coat|COPII vesicle coat|endoplasmic reticulum-Golgi intermediate compartment membrane|extracellular vesicular exosome|	protein transport|	None	45.1976	43.0005	41.2042	0.04558	0.01585	0.44536	0.67316	0.43379	0.77645	0.11189	Rank3
MRPL23	mitochondrial ribosomal protein L23	nucleolus|mitochondrion|mitochondrial large ribosomal subunit|	translation|	nucleotide binding|RNA binding|structural constituent of ribosome|	58.985	59.7945	79.9444	0.014834	0.80177	0.019422	0.97615	0.787	0.93331	0.84152	Rank3
INTS2	integrator complex subunit 2	intracellular|membrane|integral component of membrane|nuclear membrane|integrator complex|	snRNA processing|	protein binding|	27.5998	28.3195	24.6935	0.0052517	0.0010579	0.73002	0.48156	0.56844	0.30598	0.41353	Rank3
SMARCC2	SWI/SNF related, matrix associated, actin dependent regulator of chromatin, subfamily c, member 2	nuclear chromatin|nucleus|SWI/SNF complex|transcriptional repressor complex|protein complex|npBAF complex|nBAF complex|	nucleosome disassembly|chromatin remodeling|transcription, DNA-templated|regulation of transcription from RNA polymerase II promoter|nervous system development|ATP-dependent chromatin remodeling|negative regulation of transcription, DNA-templated|positive regulation of transcription, DNA-templated|	RNA polymerase II core promoter proximal region sequence-specific DNA binding|RNA polymerase II distal enhancer sequence-specific DNA binding|transcription coactivator activity|protein binding|nucleosomal DNA binding|	50.3172	56.816	54.3346	0.03112	0.0085577	0.86915	0.58703	0.61261	0.61603	0.27951	Rank3
DDRGK1	DDRGK domain containing 1	endoplasmic reticulum|	None	protein binding|	9.68848	10.9843	11.4666	0.037915	0.029416	0.35328	0.27136	0.14127	0.6233	0.39623	Rank3
ANXA11	annexin A11	nucleus|nuclear envelope|nuclear envelope|nucleoplasm|nucleoplasm|cytoplasm|spindle|membrane|midbody|melanosome|specific granule|azurophil granule|phagocytic vesicle|extracellular vesicular exosome|	phagocytosis|cytokinesis, completion of separation|response to calcium ion|	calcium ion binding|protein binding|calcium-dependent phospholipid binding|phosphatidylethanolamine binding|MHC class II protein complex binding|S100 protein binding|poly(A) RNA binding|calcium-dependent protein binding|	44.0202	47.8972	47.1354	0.026008	0.12388	0.14723	0.31287	0.57581	0.26737	0.010253	Rank1
GNL1	guanine nucleotide binding protein-like 1	extracellular space|nucleus|cytosol|	T cell mediated immunity|GTP catabolic process|cellular response to DNA damage stimulus|signal transduction|ribosome biogenesis|	GTPase activity|structural molecule activity|GTP binding|	16.2245	18.4776	19.1454	0.017911	0.043274	0.18579	0.24546	0.36888	0.30598	0.11809	Rank3
EPB41	erythrocyte membrane protein band 4.1	nucleus|plasma membrane|spectrin|spectrin-associated cytoskeleton|extrinsic component of membrane|cortical cytoskeleton|protein complex|	blood circulation|actin cytoskeleton organization|cortical actin cytoskeleton organization|positive regulation of protein binding|	actin binding|structural constituent of cytoskeleton|protein binding|calmodulin binding|1-phosphatidylinositol binding|spectrin binding|	47.0886	51.0083	47.1539	0.014835	0.029416	0.10567	0.62865	0.96646	0.45647	0.10874	Rank3
SLC2A1	solute carrier family 2 (facilitated glucose transporter), member 1	female pronucleus|plasma membrane|integral component of plasma membrane|caveola|cell-cell junction|membrane|basolateral plasma membrane|midbody|cortical actin cytoskeleton|melanosome|extracellular vesicular exosome|blood microparticle|	carbohydrate metabolic process|energy reserve metabolic process|protein complex assembly|vitamin metabolic process|water-soluble vitamin metabolic process|response to osmotic stress|hexose transport|glucose transport|glucose transport|L-ascorbic acid metabolic process|cellular response to glucose starvation|xenobiotic transport|small molecule metabolic process|regulation of insulin secretion|tran…	glucose transmembrane transporter activity|protein binding|kinase binding|dehydroascorbic acid transporter activity|identical protein binding|xenobiotic transporter activity|protein self-association|D-glucose transmembrane transporter activity|	118.134	148.452	131.26	0.0042885	0.00096146	0.38559	0.27136	0.36417	0.41099	0.086664	Rank3
NPM2	nucleophosmin/nucleoplasmin 2	cytoplasmic chromatin|nuclear chromatin|nucleus|	chromatin remodeling|regulation of exit from mitosis|single fertilization|embryo development|oocyte differentiation|positive regulation of catalytic activity|positive regulation of DNA replication|positive regulation of meiosis|protein homooligomerization|	nucleic acid binding|enzyme binding|histone binding|	6.45515	5.72024	6.96959	0.00099328	0.014152	0.20569	0.14099	0.13179	0.41979	0.17189	Rank3
GATAD1	GATA zinc finger domain containing 1	nucleus|	regulation of transcription, DNA-templated|	sequence-specific DNA binding transcription factor activity|zinc ion binding|sequence-specific DNA binding|	3.46954	3.50205	3.30462	0.036691	0.023229	0.82756	0.22163	0.1032	0.66326	0.77861	Rank3
ZNF706	zinc finger protein 706	None	None	metal ion binding|	52.1048	47.7488	43.9741	0.046088	0.036858	0.52323	0.35244	0.71426	0.15236	0.071899	Rank3
THAP3	THAP domain containing, apoptosis associated protein 3	None	None	DNA binding|protein binding|metal ion binding|	8.04865	8.15368	8.5119	0.039686	0.20661	0.10432	0.17082	0.10003	0.3647	0.036318	Rank1
WDR45B	WD repeat domain 45B	None	None	None	58.1254	60.6728	56.9414	0.001333	0.16184	0.036382	0.52039	0.51842	0.36063	0.056222	Rank3
WTAP	Wilms tumor 1 associated protein	nucleus|nuclear speck|nuclear membrane|MIS complex|	regulation of alternative mRNA splicing, via spliceosome|mRNA processing|cell cycle|RNA splicing|mRNA methylation|	None	47.9492	51.1972	43.8378	0.041092	0.019475	0.33317	0.90157	0.43831	0.84547	0.18905	Rank3
CHTF18	CTF18, chromosome transmission fidelity factor 18 homolog (S. cerevisiae)	nucleus|cytoplasm|membrane|	DNA replication|cell cycle|	DNA binding|ATP binding|nucleoside-triphosphatase activity|	19.5361	18.7879	24.5886	0.043527	0.0062206	0.78645	0.29729	0.13179	0.88351	0.39624	Rank3
VPS45	vacuolar protein sorting 45 homolog (S. cerevisiae)	Golgi membrane|cellular_component|Golgi apparatus|endosome membrane|integral component of membrane|	intracellular protein transport|vesicle docking involved in exocytosis|blood coagulation|	molecular_function|	34.5974	33.9469	32.6632	0.013476	0.0066543	0.84651	0.81788	0.60063	0.83045	0.8719	Rank3
SSB	Sjogren syndrome antigen B (autoantigen La)	nucleus|ribonucleoprotein complex|	tRNA modification|histone mRNA metabolic process|	tRNA binding|nucleotide binding|mRNA binding|protein binding|poly(A) RNA binding|	198.615	170.921	161.967	0.03112	0.0099592	0.45377	0.61201	0.41105	0.59108	0.8215	Rank3
ZCCHC9	zinc finger, CCHC domain containing 9	None	negative regulation of phosphatase activity|	zinc ion binding|poly(A) RNA binding|	40.5442	38.4804	34.7673	0.043527	0.0062201	0.86915	0.5093	0.42932	0.17571	0.83077	Rank3
HNRNPUL2	heterogeneous nuclear ribonucleoprotein U-like 2	nucleus|membrane|	biological_process|	poly(A) RNA binding|	18.4236	20.1933	23.1111	0.043034	0.011251	0.74244	0.72777	0.69642	0.4675	0.29259	Rank3
OTULIN	N/A	None	None	None	2.80304	2.97203	2.76658	0.010746	0.040591	0.44273	0.82553	0.5703	0.58871	0.71733	Rank3
CPOX	coproporphyrinogen oxidase	mitochondrion|mitochondrial inner membrane|mitochondrial intermembrane space|	porphyrin-containing compound metabolic process|protoporphyrinogen IX biosynthetic process|heme biosynthetic process|response to iron ion|response to lead ion|response to insecticide|small molecule metabolic process|response to arsenic-containing substance|response to methylmercury|oxidation-reduction process|	coproporphyrinogen oxidase activity|structural constituent of eye lens|protein homodimerization activity|	285.476	331.672	373.857	0.043034	0.026489	0.90822	0.087724	0.26471	0.12322	0.26216	Rank3
CINP	cyclin-dependent kinase 2 interacting protein	nucleus|	DNA replication|DNA repair|cell cycle|cell division|	protein binding|	54.2112	51.6367	57.0328	0.035906	0.014152	0.92471	0.54545	0.41552	0.46311	0.82344	Rank3
RRM2B	ribonucleotide reductase M2 B (TP53 inducible)	nucleus|nucleoplasm|cytoplasm|extracellular vesicular exosome|	kidney development|renal system process|mitochondrial DNA replication|DNA repair|response to oxidative stress|deoxyribonucleoside diphosphate metabolic process|deoxyribonucleoside triphosphate metabolic process|deoxyribonucleotide biosynthetic process|nucleobase-containing small molecule interconversion|small molecule metabolic process|nucleobase-containing small molecule metabolic process|oxidat…	ribonucleoside-diphosphate reductase activity, thioredoxin disulfide as acceptor|metal ion binding|	56.9546	55.5754	50.7138	0.00099277	0.2956	0.00021427	0.91198	0.45589	0.91643	0.18475	Rank3
RPTOR	regulatory associated protein of MTOR, complex 1	cytoplasm|lysosome|lysosomal membrane|cytosol|TORC1 complex|	positive regulation of endothelial cell proliferation|cell cycle arrest|insulin receptor signaling pathway|regulation of cell size|cell growth|cellular response to nutrient levels|TOR signaling|positive regulation of TOR signaling|positive regulation of transcription from RNA polymerase III promoter|cellular response to amino acid stimulus|positive regulation of protein serine/threonine kinase ac…	RNA polymerase III type 1 promoter DNA binding|RNA polymerase III type 2 promoter DNA binding|RNA polymerase III type 3 promoter DNA binding|TFIIIC-class transcription factor binding|protein binding|protein kinase binding|protein complex binding|14-3-3 protein binding|	19.7731	21.3238	22.9136	0.017912	0.14351	0.0066105	0.92851	0.41552	0.94581	0.05427	Rank3
MBD6	methyl-CpG binding domain protein 6	nucleus|chromocenter|	None	chromatin binding|	2.2041	2.26596	2.13897	0.015528	0.56023	5.9277e-05	0.39376	0.52235	0.38785	0.18045	Rank3
TFAM	transcription factor A, mitochondrial	nucleus|mitochondrion|mitochondrial matrix|mitochondrial nucleoid|	DNA-dependent DNA replication|regulation of transcription from RNA polymerase I promoter|transcription from mitochondrial promoter|transcription from mitochondrial promoter|transcription initiation from mitochondrial promoter|transcription initiation from mitochondrial promoter|gene expression|mitochondrial respiratory chain complex assembly|positive regulation of transcription, DNA-templated|	chromatin binding|sequence-specific DNA binding transcription factor activity|protein binding|DNA binding, bending|heat shock protein binding|poly(A) RNA binding|mitochondrial light strand promoter sense binding|	44.0043	44.8757	42.8761	0.012272	0.075546	0.0042307	0.71983	0.46898	0.43179	0.53895	Rank3
CMBL	carboxymethylenebutenolidase homolog (Pseudomonas)	cytosol|extracellular vesicular exosome|	metabolic process|	hydrolase activity|	27.8047	28.9644	27.918	0.027707	0.026489	0.33317	0.07979	0.28384	0.14249	0.075339	Rank3
RWDD4	RWD domain containing 4	None	None	None	8.62831	9.32706	6.75309	0.024304	0.0054272	0.088044	0.57317	0.47318	0.5052	0.83077	Rank3
COG8	component of oligomeric golgi complex 8	Golgi membrane|membrane|Golgi transport complex|Golgi transport complex|	protein transport|	None	8.501	9.16958	9.33724	0.023415	0.038653	0.51105	0.16543	0.15072	0.32965	0.55042	Rank3
LAD1	ladinin 1	basement membrane|	None	structural molecule activity|	15.92	14.3306	15.0369	0.027934	0.031331	0.05087	0.69804	0.55525	0.68274	0.93581	Rank3
SARAF	N/A	None	None	None	138.116	143.866	155.042	0.010384	0.016143	0.20469	0.17562	0.14127	0.19016	0.10117	Rank3
CDPF1	cysteine-rich, DPF motif domain containing 1	None	None	None	7.19862	5.85381	6.79469	0.03112	0.65042	0.035812	0.58984	0.81556	0.31399	0.12286	Rank3
RABL2B	RAB, member of RAS oncogene family-like 2B	None	GTP catabolic process|small GTPase mediated signal transduction|	GTPase activity|GTP binding|	9.14081	8.51263	9.54066	0.038775	0.016542	0.62906	0.72518	0.48998	0.4675	0.33133	Rank3
LLGL2	lethal giant larvae homolog 2 (Drosophila)	cytoplasm|	exocytosis|cell cycle|regulation of establishment or maintenance of cell polarity|cell division|	protein binding|PDZ domain binding|	38.8627	39.1013	41.6199	0.022929	0.46459	0.00018399	0.26775	0.25044	0.29158	0.06982	Rank3
C17orf49	chromosome 17 open reading frame 49	NURF complex|MLL1 complex|	chromatin modification|	DNA binding|chromatin binding|	22.1115	23.2716	24.91	0.0004611	0.029416	0.054032	0.34361	0.41552	0.20132	0.098345	Rank3
KCTD13	potassium channel tetramerization domain containing 13	nucleus|Cul3-RING ubiquitin ligase complex|	DNA replication|cell migration|protein ubiquitination|protein ubiquitination|negative regulation of Rho protein signal transduction|stress fiber assembly|proteasome-mediated ubiquitin-dependent protein catabolic process|positive regulation of DNA replication|protein homooligomerization|	ubiquitin-protein transferase activity|GTP-Rho binding|protein domain specific binding|identical protein binding|	5.1601	5.28919	5.02074	0.02681	0.43935	0.035812	0.16543	0.49829	0.053318	0.14726	Rank3
SNRNP25	small nuclear ribonucleoprotein 25kDa (U11/U12)	nucleus|U12-type spliceosomal complex|cytoplasm|intercellular bridge|	mRNA processing|RNA splicing|	None	35.5981	37.9284	38.3727	0.0092721	0.00324	0.8002	0.57599	0.41105	0.12832	0.82344	Rank3
TMEM11	transmembrane protein 11	integral component of plasma membrane|integral component of mitochondrial inner membrane|	mitochondrion organization|	molecular_function|protein binding|	14.8467	16.6619	18.8281	0.043527	0.017892	0.18076	0.68703	0.54202	0.57984	0.18475	Rank3
PAPSS2	3'-phosphoadenosine 5'-phosphosulfate synthase 2	cytosol|	sulfate assimilation|skeletal system development|carbohydrate metabolic process|xenobiotic metabolic process|blood coagulation|phosphorylation|glycosaminoglycan metabolic process|small molecule metabolic process|3'-phosphoadenosine 5'-phosphosulfate metabolic process|3'-phosphoadenosine 5'-phosphosulfate biosynthetic process|bone development|	adenylylsulfate kinase activity|sulfate adenylyltransferase (ATP) activity|ATP binding|nucleotidyltransferase activity|	5.72368	8.39604	7.57265	0.0115	0.06937	0.32399	0.14099	0.26471	0.15623	0.011669	Rank1
GLRX5	glutaredoxin 5	nucleus|mitochondrion|mitochondrion|	hemopoiesis|cell redox homeostasis|oxidation-reduction process|	electron carrier activity|protein disulfide oxidoreductase activity|metal ion binding|2 iron, 2 sulfur cluster binding|	38.9745	37.0471	42.5741	0.04558	0.011031	0.91051	0.65922	0.53815	0.45647	0.84152	Rank3
TMEM41A	transmembrane protein 41A	integral component of membrane|	None	None	4.98687	4.97118	4.95421	0.037083	0.39173	0.039903	0.96202	0.43831	0.97316	0.36576	Rank3
INO80C	INO80 complex subunit C	nucleolus|Ino80 complex|MLL1 complex|	DNA repair|DNA recombination|transcription, DNA-templated|regulation of transcription, DNA-templated|biological_process|	molecular_function|	11.0609	10.6402	10.4933	0.010746	0.16331	0.0087557	0.76007	0.41105	0.66465	0.605	Rank3
ARL16	ADP-ribosylation factor-like 16	intracellular|	small GTPase mediated signal transduction|	GTP binding|	30.0018	34.7435	34.5378	0.043034	0.013111	0.44939	0.44279	0.86568	0.37923	0.058228	Rank3
ATP6V0D1	ATPase, H+ transporting, lysosomal 38kDa, V0 subunit d1	lysosomal membrane|early endosome|centrosome|synaptic vesicle|endosome membrane|membrane|apical plasma membrane|vacuolar proton-transporting V-type ATPase complex|vacuolar proton-transporting V-type ATPase complex|phagocytic vesicle membrane|proton-transporting V-type ATPase, V0 domain|axon terminus|extracellular vesicular exosome|	cellular iron ion homeostasis|activation of signaling protein activity involved in unfolded protein response|brain development|insulin receptor signaling pathway|ATP hydrolysis coupled proton transport|proton transport|endoplasmic reticulum unfolded protein response|transferrin transport|cilium assembly|cellular protein metabolic process|interaction with host|transmembrane transport|phagosome mat…	protein binding|hydrogen-exporting ATPase activity, phosphorylative mechanism|protein complex binding|	43.256	47.9132	51.003	0.031808	0.019476	0.67622	0.92564	0.43379	0.92961	0.82344	Rank3
MCTS1	malignant T cell amplified sequence 1	cytoplasm|plasma membrane|cytosolic small ribosomal subunit|	formation of translation preinitiation complex|IRES-dependent translational initiation|transcription, DNA-templated|regulation of transcription, DNA-templated|cellular response to DNA damage stimulus|cell cycle|positive regulation of cell proliferation|ribosome disassembly|regulation of growth|	RNA binding|	15.4265	12.8342	11.6662	0.02293	0.14351	0.22604	0.0898	0.43379	0.021916	0.076525	Rank3
RGS10	regulator of G-protein signaling 10	nucleus|cytoplasm|plasma membrane|neuronal cell body|dendritic spine|axon terminus|	termination of G-protein coupled receptor signaling pathway|positive regulation of GTPase activity|	GTPase activator activity|	47.115	43.0556	36.9155	0.039686	0.28275	0.21777	0.48434	0.51842	0.15924	0.017091	Rank1
CDIPT	CDP-diacylglycerol--inositol 3-phosphatidyltransferase	Golgi membrane|endoplasmic reticulum membrane|plasma membrane|membrane|integral component of membrane|	phospholipid metabolic process|phosphatidylinositol biosynthetic process|phosphatidylinositol biosynthetic process|small molecule metabolic process|CDP-diacylglycerol metabolic process|glycerophospholipid biosynthetic process|	CDP-diacylglycerol-inositol 3-phosphatidyltransferase activity|CDP-diacylglycerol-inositol 3-phosphatidyltransferase activity|diacylglycerol binding|manganese ion binding|carbohydrate binding|alcohol binding|	42.4326	45.5649	49.3543	0.016301	0.15475	0.0054352	0.92658	0.41552	0.93678	0.05427	Rank3
STOML2	stomatin (EPB72)-like 2	immunological synapse|mitochondrial inner membrane|mitochondrial intermembrane space|cytoskeleton|COP9 signalosome|actin cytoskeleton|extrinsic component of plasma membrane|T cell receptor complex|membrane raft|	mitochondrial calcium ion transport|cellular calcium ion homeostasis|mitochondrion organization|lipid localization|positive regulation of mitochondrial membrane potential|interleukin-2 production|mitochondrial protein processing|CD4-positive, alpha-beta T cell activation|mitochondrial ATP synthesis coupled proton transport|T cell receptor signaling pathway|protein oligomerization|positive regulat…	receptor binding|protein binding|cardiolipin binding|	120.557	124.045	130.154	0.031119	0.82164	0.0011735	0.91741	0.41552	0.92961	0.83257	Rank3
POC1B	POC1 centriolar protein B	spindle pole|centrosome|centriole|ciliary basal body|	cell proliferation|cilium assembly|	protein binding|	11.6556	11.2051	10.2748	0.026008	0.017892	0.15818	0.62309	0.53031	0.57386	0.11809	Rank3
WDR18	WD repeat domain 18	nucleoplasm|cytoplasm|	multicellular organismal development|	protein binding|	76.7871	76.5496	92.2711	0.012572	0.13947	0.040823	0.30079	0.44721	0.076286	0.34863	Rank3
PSMG1	proteasome (prosome, macropain) assembly chaperone 1	nucleus|cytoplasm|endoplasmic reticulum|	proteasome assembly|	protein binding|	60.2349	59.1354	58.5143	0.0030676	0.0013417	0.65766	0.91847	0.43379	0.92961	0.82344	Rank3
DCK	deoxycytidine kinase	nucleus|cytosol|	purine nucleobase metabolic process|pyrimidine nucleobase metabolic process|pyrimidine nucleotide metabolic process|deoxyribonucleoside monophosphate biosynthetic process|deoxyribonucleoside monophosphate biosynthetic process|deoxyribonucleoside monophosphate biosynthetic process|nucleotide biosynthetic process|phosphorylation|pyrimidine nucleoside salvage|purine-containing compound salvage|small…	deoxycytidine kinase activity|ATP binding|drug binding|phosphotransferase activity, alcohol group as acceptor|nucleoside kinase activity|protein homodimerization activity|	37.3824	41.8235	39.9239	0.014834	0.054621	0.039903	0.25598	0.26471	0.15688	0.050583	Rank3
SLC25A26	solute carrier family 25 (S-adenosylmethionine carrier), member 26	mitochondrion|mitochondrial inner membrane|integral component of membrane|	S-adenosyl-L-methionine transport|S-adenosyl-L-methionine transmembrane transport|	S-adenosyl-L-methionine transmembrane transporter activity|	12.3286	12.2593	12.3103	0.027407	0.81393	0.0063498	0.64805	0.41552	0.59108	0.42225	Rank3
PDF	peptide deformylase (mitochondrial)	mitochondrion|	translation|positive regulation of cell proliferation|peptidyl-methionine modification|N-terminal protein amino acid modification|	iron ion binding|peptide deformylase activity|	3.49778	3.64084	3.46989	0.04715	0.022832	0.088044	0.63147	0.38763	0.41438	0.082919	Rank3
POLR2J3	polymerase (RNA) II (DNA directed) polypeptide J3	nucleus|	transcription, DNA-templated|	DNA binding|DNA-directed RNA polymerase activity|protein dimerization activity|	2.86192	2.92604	3.01116	0.027407	0.81393	0.02912	0.58984	0.41105	0.43179	0.82344	Rank3
GABRD	gamma-aminobutyric acid (GABA) A receptor, delta	integral component of plasma membrane|cell junction|chloride channel complex|postsynaptic membrane|	transport|signal transduction|synaptic transmission|chloride transmembrane transport|	GABA-A receptor activity|extracellular ligand-gated ion channel activity|chloride channel activity|	11.5731	13.7028	12.8877	0.016301	0.12625	0.11586	0.076432	0.073248	0.34453	0.0064567	Rank1
SRP9	signal recognition particle 9kDa	signal recognition particle receptor complex|signal recognition particle, endoplasmic reticulum targeting|cytosol|extracellular vesicular exosome|	translation|SRP-dependent cotranslational protein targeting to membrane|gene expression|cellular protein metabolic process|negative regulation of translational elongation|	RNA binding|signal recognition particle binding|7S RNA binding|	381.254	416.334	387.245	0.048256	0.82164	0.033766	0.76937	0.46898	0.84276	0.85344	Rank3
NOP2	NOP2 nucleolar protein	nucleolus|	rRNA processing|positive regulation of cell proliferation|methylation|	protein binding|S-adenosylmethionine-dependent methyltransferase activity|poly(A) RNA binding|	113.549	109.479	117.535	0.035189	0.81393	0.028701	0.65923	0.41105	0.74446	0.8271	Rank3
OSBPL7	oxysterol binding protein-like 7	autophagic vacuole|cytosol|plasma membrane|perinuclear endoplasmic reticulum|	lipid transport|cellular response to cholesterol|positive regulation of proteasomal protein catabolic process|	protein binding|cholesterol binding|	2.48169	2.60245	2.66204	0.024303	0.5067	0.010716	0.57317	0.44278	0.41099	0.45254	Rank3
KPNB1	karyopherin (importin) beta 1	nucleus|nuclear envelope|nuclear pore|nucleoplasm|cytoplasm|cytosol|membrane|nuclear membrane|extracellular vesicular exosome|endoplasmic reticulum tubular network|	protein import into nucleus, translocation|apoptotic DNA fragmentation|protein import into nucleus|NLS-bearing protein import into nucleus|ribosomal protein import into nucleus|apoptotic process|cellular component disassembly involved in execution phase of apoptosis|viral process|viral life cycle|cytokine-mediated signaling pathway|small molecule metabolic process|intracellular transport of virus|	protein binding|nuclear localization sequence binding|zinc ion binding|Ran GTPase binding|protein transporter activity|enzyme binding|protein domain specific binding|poly(A) RNA binding|	475.233	513.728	488.35	0.022339	0.80785	0.010742	0.91198	0.41105	0.92961	0.81581	Rank3
NLE1	notchless homolog 1 (Drosophila)	nucleus|nucleolus|	inner cell mass cell differentiation|Notch signaling pathway|positive regulation of canonical Wnt signaling pathway|negative regulation of cysteine-type endopeptidase activity involved in apoptotic signaling pathway|	None	18.2462	15.4606	17.6927	0.027934	0.81393	0.042601	0.47327	0.44278	0.19351	0.18045	Rank3
PNRC2	proline-rich nuclear receptor coactivator 2	cytoplasmic mRNA processing body|nucleus|	nuclear-transcribed mRNA catabolic process, nonsense-mediated decay|transcription, DNA-templated|regulation of transcription, DNA-templated|deadenylation-independent decapping of nuclear-transcribed mRNA|	protein binding|	38.2172	37.8529	30.5887	0.039686	0.057683	0.29214	0.10576	0.24564	0.092674	0.0083078	Rank1
LZTFL1	leucine zipper transcription factor-like 1	cytoplasm|BBSome|	establishment of protein localization to organelle|	protein binding|identical protein binding|	14.3357	12.8749	11.2827	0.027707	0.038653	0.65274	0.62309	0.72082	0.52281	0.52727	Rank3
FUT11	fucosyltransferase 11 (alpha (1,3) fucosyltransferase)	integral component of membrane|Golgi cisterna membrane|extracellular vesicular exosome|	protein glycosylation|fucosylation|	alpha-(1->3)-fucosyltransferase activity|	2.66888	3.42888	3.13045	0.031808	0.81393	0.018156	0.80609	0.41552	0.52384	0.6751	Rank3
MRPL49	mitochondrial ribosomal protein L49	mitochondrial ribosome|	translation|	structural constituent of ribosome|protein binding|	86.6529	92.6863	89.2625	0.043034	0.1408	0.040185	0.27136	0.16479	0.32327	0.10714	Rank3
SLC46A1	solute carrier family 46 (folate transporter), member 1	cytoplasm|plasma membrane|integral component of membrane|apical plasma membrane|brush border membrane|	vitamin metabolic process|water-soluble vitamin metabolic process|cellular iron ion homeostasis|folic acid transport|heme transport|small molecule metabolic process|folic acid metabolic process|methotrexate transport|transmembrane transport|	folic acid binding|folic acid transporter activity|heme transporter activity|methotrexate transporter activity|	2.97884	3.34987	2.97983	0.022929	0.28275	0.10567	0.36056	0.23608	0.7203	0.037533	Rank1
SLX1A	SLX1 structure-specific endonuclease subunit homolog A (S. cerevisiae)	Slx1-Slx4 complex|	double-strand break repair via homologous recombination|DNA catabolic process, endonucleolytic|DNA catabolic process, endonucleolytic|DNA repair|DNA double-strand break processing involved in repair via single-strand annealing|	protein binding|crossover junction endodeoxyribonuclease activity|5'-flap endonuclease activity|metal ion binding|	18.777	17.2866	22.415	0.016301	0.078255	0.11226	0.26443	0.20269	0.42077	0.0064562	Rank1
SLC35B1	solute carrier family 35, member B1	endoplasmic reticulum membrane|integral component of membrane|intracellular membrane-bounded organelle|	transport|UDP-galactose transmembrane transport|	UDP-galactose transmembrane transporter activity|	82.8047	88.8414	87.1063	0.012085	0.071038	0.13315	0.062438	0.41105	0.0018	0.10117	Rank3
WRAP53	WD repeat containing, antisense to TP53	nucleus|telomerase holoenzyme complex|cytoplasm|Cajal body|	telomere formation via telomerase|positive regulation of telomerase activity|	RNA binding|protein binding|	19.6949	20.0313	22.1303	0.010625	0.036859	0.32399	0.63982	0.44278	0.4915	0.21491	Rank3
MYL6B	myosin, light chain 6B, alkali, smooth muscle and non-muscle	cytosol|muscle myosin complex|myosin complex|unconventional myosin complex|	muscle contraction|skeletal muscle tissue development|metabolic process|muscle filament sliding|	motor activity|calcium ion binding|protein binding|structural constituent of muscle|	38.9086	40.4957	40.7137	0.0092726	0.8226	0.0037544	0.80205	0.53815	0.78975	0.5945	Rank3
TUBGCP4	tubulin, gamma complex associated protein 4	spindle pole|centrosome|cytosol|microtubule|gamma-tubulin ring complex|microtubule cytoskeleton|membrane|	G2/M transition of mitotic cell cycle|mitotic cell cycle|protein complex assembly|microtubule nucleation|	structural constituent of cytoskeleton|	9.82109	10.0601	10.1445	0.00013009	0.51226	0.0015753	0.40545	0.41105	0.41099	0.18475	Rank3
C9orf116	chromosome 9 open reading frame 116	None	None	None	2.88932	3.19737	3.15931	0.035189	0.0074087	0.49435	0.34552	0.54202	0.34848	0.1546	Rank3
SURF2	surfeit 2	cellular_component|nucleus|nucleolus|plasma membrane|	biological_process|	molecular_function|	6.99466	6.61831	8.00863	0.046644	0.099531	0.012436	0.32983	0.59355	0.10179	0.41353	Rank3
ACAP3	ArfGAP with coiled-coil, ankyrin repeat and PH domains 3	None	regulation of ARF GTPase activity|positive regulation of GTPase activity|	ARF GTPase activator activity|zinc ion binding|	4.11372	4.64128	5.6299	0.02293	0.075547	0.14142	0.066417	0.073248	0.56511	0.038824	Rank1
C6orf99	chromosome 6 open reading frame 99	None	None	None	3.93669	3.66315	3.77112	0.039686	0.46736	0.071271	0.22628	0.10003	0.74553	0.0078495	Rank1
PLEKHG6	pleckstrin homology domain containing, family G (with RhoGef domain) member 6	spindle pole|cytoplasm|cleavage furrow|	positive regulation of Rho GTPase activity|	Rho guanyl-nucleotide exchange factor activity|GTPase activator activity|protein binding|	6.08687	5.80845	7.10379	0.031808	0.047388	0.11586	0.95837	0.75117	0.95721	0.082919	Rank3
PES1	pescadillo ribosomal biogenesis factor 1	condensed chromosome|nucleoplasm|nucleolus|cytoplasm|membrane|preribosome, large subunit precursor|PeBoW complex|	maturation of LSU-rRNA from tricistronic rRNA transcript (SSU-rRNA, 5.8S rRNA, LSU-rRNA)|maturation of 5.8S rRNA from tricistronic rRNA transcript (SSU-rRNA, 5.8S rRNA, LSU-rRNA)|rRNA processing|nucleolus organization|cell proliferation|cell proliferation|protein localization to organelle|ribosomal large subunit biogenesis|regulation of cell cycle|	protein binding|ribonucleoprotein complex binding|poly(A) RNA binding|	212.476	204.323	217.609	0.037915	0.010338	0.48413	0.93408	0.46898	0.92961	0.26216	Rank3
VASH1	vasohibin 1	extracellular space|cytoplasm|endoplasmic reticulum|apical part of cell|	angiogenesis|negative regulation of endothelial cell proliferation|cell cycle arrest|response to wounding|negative regulation of endothelial cell migration|negative regulation of angiogenesis|negative regulation of angiogenesis|negative regulation of blood vessel endothelial cell migration|negative regulation of lymphangiogenesis|regulation of cellular senescence|	None	2.74194	3.29809	3.50553	0.017313	0.013602	0.25623	0.92058	0.52235	0.90323	0.32275	Rank3
ORAI2	ORAI calcium release-activated calcium modulator 2	integral component of membrane|growth cone|	None	protein binding|	2.27911	2.88714	3.12662	0.043526	0.031331	0.74371	0.70087	0.77481	0.47073	0.33133	Rank3
RPL36AL	ribosomal protein L36a-like	ribosome|	translation|	structural constituent of ribosome|	151.359	143.172	135.501	0.0074112	0.3636	0.015435	0.65091	0.42482	0.57386	0.082918	Rank3
MAP2K5	mitogen-activated protein kinase kinase 5	nucleus|spindle|cytosol|	negative regulation of transcription from RNA polymerase II promoter|activation of MAPK activity|signal transduction|heart development|peptidyl-tyrosine phosphorylation|positive regulation of cell growth|negative regulation of NF-kappaB transcription factor activity|negative regulation of heterotypic cell-cell adhesion|negative regulation of cysteine-type endopeptidase activity involved in apopto…	protein kinase activity|protein serine/threonine kinase activity|protein tyrosine kinase activity|protein binding|ATP binding|metal ion binding|	6.14449	6.62724	6.46878	0.02681	0.0077438	0.61278	0.6925	0.4559	0.22345	0.12778	Rank3
SPAG9	sperm associated antigen 9	acrosomal vesicle|cytoplasm|cytosol|integral component of membrane|perinuclear region of cytoplasm|extracellular vesicular exosome|	activation of JUN kinase activity|spermatogenesis|positive regulation of cell migration|retrograde transport, endosome to Golgi|muscle cell differentiation|positive regulation of neuron differentiation|striated muscle cell differentiation|positive regulation of muscle cell differentiation|protein homooligomerization|negative regulation of protein homodimerization activity|	protein binding|JUN kinase binding|kinesin binding|mitogen-activated protein kinase p38 binding|	58.192	61.5009	52.4411	0.048838	0.031331	0.37797	0.22316	0.22649	0.15753	0.27951	Rank3
DDX39B	DEAD (Asp-Glu-Ala-Asp) box polypeptide 39B	transcription export complex|nucleus|spliceosomal complex|U4 snRNP|U6 snRNP|cytoplasm|nuclear speck|	spliceosomal complex assembly|mRNA splicing, via spliceosome|ATP catabolic process|ATP catabolic process|mRNA export from nucleus|mRNA export from nucleus|RNA splicing|RNA secondary structure unwinding|positive regulation of DNA-templated transcription, elongation|viral mRNA export from host cell nucleus|negative regulation of DNA damage checkpoint|	ATP-dependent RNA helicase activity|protein binding|ATP binding|RNA-dependent ATPase activity|U6 snRNA binding|U4 snRNA binding|ATP-dependent protein binding|poly(A) RNA binding|	686.348	673.326	676.695	0.04715	0.038652	0.44029	0.57872	0.42022	0.12895	0.21059	Rank3
UBXN4	UBX domain protein 4	nuclear envelope|cytoplasm|endoplasmic reticulum|endoplasmic reticulum membrane|	response to unfolded protein|	protein binding|	44.1441	42.2653	39.1527	0.00099277	0.049585	0.054746	0.20942	0.15546	0.80113	0.591	Rank3
EIF3J	eukaryotic translation initiation factor 3, subunit J	cytosol|eukaryotic translation initiation factor 3 complex|eukaryotic 43S preinitiation complex|eukaryotic 48S preinitiation complex|	formation of translation preinitiation complex|translation|translational initiation|translational initiation|regulation of translational initiation|gene expression|cellular protein metabolic process|	translation initiation factor activity|protein binding|	67.8109	61.2078	58.4979	0.02958	0.01585	0.71615	0.58984	0.43379	0.42735	0.53895	Rank3
VMP1	vacuole membrane protein 1	pre-autophagosomal structure|autophagic vacuole membrane|endoplasmic reticulum|plasma membrane|integral component of membrane|endoplasmic reticulum-Golgi intermediate compartment membrane|	autophagy|embryo implantation|regulation of autophagy|single organismal cell-cell adhesion|cell junction assembly|	protein binding|	132.631	155.093	135.535	0.027707	0.25502	0.030983	0.9417	0.51447	0.92297	0.24928	Rank3
USP15	ubiquitin specific peptidase 15	nucleus|cytoplasm|	ubiquitin-dependent protein catabolic process|transforming growth factor beta receptor signaling pathway|transforming growth factor beta receptor signaling pathway|transforming growth factor beta receptor signaling pathway|protein deubiquitination|BMP signaling pathway|negative regulation of transforming growth factor beta receptor signaling pathway|monoubiquitinated protein deubiquitination|path…	cysteine-type endopeptidase activity|ubiquitin thiolesterase activity|ubiquitin-specific protease activity|transforming growth factor beta receptor binding|identical protein binding|SMAD binding|	56.211	49.8442	62.2671	0.0079557	0.090769	0.10829	0.40752	0.41105	0.03045	0.70921	Rank3
CENPM	centromere protein M	condensed chromosome kinetochore|nucleus|cytosol|	mitotic cell cycle|	None	18.4976	18.5591	23.138	0.027707	0.0062201	0.24387	0.94007	0.43379	0.92961	0.13119	Rank3
HAUS1	HAUS augmin-like complex, subunit 1	spindle pole|cytoplasm|centrosome|microtubule|HAUS complex|	mitotic nuclear division|spindle assembly|centrosome organization|	molecular_function|protein binding|	104.773	96.6771	86.8255	0.043526	0.021724	0.46829	0.39866	0.23608	0.60682	0.27951	Rank3
CENPO	centromere protein O	condensed chromosome kinetochore|nucleus|nucleoplasm|cytosol|	mitotic cell cycle|nucleosome assembly|centromere-specific nucleosome assembly|	None	15.3543	15.1894	16.835	0.027406	0.24163	0.00080344	0.82553	0.73755	0.79257	0.16317	Rank3
OTUD4	OTU deubiquitinase 4	cellular_component|	proteolysis|protein K48-linked deubiquitination|	ubiquitin-specific protease activity|poly(A) RNA binding|	17.8213	17.3137	16.2876	0.035189	0.012527	0.41155	0.72777	0.43379	0.75178	0.20622	Rank3
SLC39A4	solute carrier family 39 (zinc transporter), member 4	plasma membrane|plasma membrane|integral component of membrane|cytoplasmic membrane-bounded vesicle|apical plasma membrane|recycling endosome membrane|extracellular vesicular exosome|	cellular zinc ion homeostasis|cellular response to zinc ion starvation|transmembrane transport|zinc ion transmembrane transport|	zinc ion transmembrane transporter activity|	37.2544	38.1926	47.8772	0.02681	0.89265	0.0033588	0.86463	0.62109	0.83609	0.88997	Rank3
MTOR	mechanistic target of rapamycin (serine/threonine kinase)	Golgi membrane|cytoplasm|mitochondrial outer membrane|lysosome|lysosomal membrane|endoplasmic reticulum membrane|cytosol|phosphatidylinositol 3-kinase complex|endomembrane system|membrane|PML body|TORC1 complex|TORC1 complex|TORC2 complex|mTOR-FKBP12-rapamycin complex|	positive regulation of protein phosphorylation|positive regulation of endothelial cell proliferation|regulation of glycogen biosynthetic process|protein phosphorylation|protein phosphorylation|response to stress|signal transduction|epidermal growth factor receptor signaling pathway|germ cell development|response to nutrient|insulin receptor signaling pathway|fibroblast growth factor receptor sign…	RNA polymerase III type 1 promoter DNA binding|RNA polymerase III type 2 promoter DNA binding|RNA polymerase III type 3 promoter DNA binding|TFIIIC-class transcription factor binding|protein serine/threonine kinase activity|protein serine/threonine kinase activity|protein binding|ATP binding|drug binding|kinase activity|kinase activity|protein domain specific binding|ribosome binding|phosphoprote…	10.011	11.3819	11.7913	0.0049187	0.0011324	0.16244	0.83292	0.4941	0.75857	0.17189	Rank3
GNB1L	guanine nucleotide binding protein (G protein), beta polypeptide 1-like	cytoplasm|cytoplasmic side of plasma membrane|	G-protein coupled receptor signaling pathway|social behavior|intracellular signal transduction|	molecular_function|	4.31814	3.87026	4.79176	0.046088	0.23075	0.019014	0.13502	0.13646	0.22258	0.1261	Rank3
MECR	mitochondrial trans-2-enoyl-CoA reductase	mitochondrion|	fatty acid metabolic process|fatty acid biosynthetic process|oxidation-reduction process|	zinc ion binding|trans-2-enoyl-CoA reductase (NADPH) activity|	24.0402	23.3589	21.1268	0.016301	0.038653	0.055785	0.92851	0.46031	0.93769	0.84152	Rank3
EPS8L1	EPS8-like 1	cytoplasm|ruffle membrane|protein complex|extracellular vesicular exosome|	Rho protein signal transduction|positive regulation of Rho GTPase activity|positive regulation of Rac GTPase activity|regulation of Rho protein signal transduction|positive regulation of ruffle assembly|	actin binding|Rho guanyl-nucleotide exchange factor activity|protein binding|Rac guanyl-nucleotide exchange factor activity|T cell receptor binding|	9.88963	7.98263	11.3927	0.048838	0.7956	0.010187	0.59262	0.48586	0.51041	0.46978	Rank3
OGFOD1	2-oxoglutarate and iron-dependent oxygenase domain containing 1	nucleus|cytoplasm|cytoplasmic stress granule|	regulation of translational termination|cell proliferation|protein hydroxylation|peptidyl-proline hydroxylation|stress granule assembly|oxidation-reduction process|	iron ion binding|L-ascorbic acid binding|peptidyl-proline dioxygenase activity|peptidyl-proline 3-dioxygenase activity|	57.4064	59.2963	63.2901	0.04558	0.22329	0.060432	0.052608	0.040206	0.61603	0.23204	Rank3
ALG1	ALG1, chitobiosyldiphosphodolichol beta-mannosyltransferase	endoplasmic reticulum|endoplasmic reticulum membrane|membrane|integral component of membrane|	protein glycosylation|dolichol-linked oligosaccharide biosynthetic process|lipopolysaccharide biosynthetic process|protein N-linked glycosylation via asparagine|post-translational protein modification|cellular protein metabolic process|mannosylation|mannosylation|	mannosyltransferase activity|chitobiosyldiphosphodolichol beta-mannosyltransferase activity|	53.1877	60.2711	59.5519	0.0192	0.63069	0.0025037	0.93927	0.54202	0.93812	0.86746	Rank3
MFSD9	major facilitator superfamily domain containing 9	plasma membrane|integral component of membrane|	transmembrane transport|	transporter activity|	2.46957	2.77361	2.78016	0.035189	0.10055	0.22604	0.061689	0.14598	0.15236	0.001703	Rank1
MBIP	MAP3K12 binding inhibitory protein 1	nucleus|Ada2/Gcn5/Ada3 transcription activator complex|nucleolus|cytoplasm|	inactivation of MAPK activity involved in osmosensory signaling pathway|chromatin organization|histone H3 acetylation|	protein kinase inhibitor activity|protein binding|identical protein binding|	22.9798	24.7549	25.5698	0.020798	0.00075567	0.80026	0.50096	0.58655	0.10428	0.75549	Rank3
DPH1	diphthamide biosynthesis 1	nucleus|cytoplasm|	translation|cell proliferation|peptidyl-diphthamide biosynthetic process from peptidyl-histidine|	None	38.5271	36.0926	39.7744	0.037915	0.43089	0.00098307	0.96324	0.7621	0.96096	0.88325	Rank3
HMG20A	high mobility group 20A	nucleus|	negative regulation of transcription from RNA polymerase II promoter|chromatin organization|transcription, DNA-templated|regulation of transcription, DNA-templated|chromatin modification|negative regulation of neuron differentiation|	DNA binding|sequence-specific DNA binding transcription factor activity|protein binding|protein heterodimerization activity|	22.1173	24.0095	19.3455	0.046644	0.41961	0.019641	0.059298	0.082266	0.51041	0.082919	Rank3
MBTD1	mbt domain containing 1	nucleus|	transcription, DNA-templated|regulation of transcription, DNA-templated|chromatin modification|embryonic skeletal system development|	zinc ion binding|	8.91345	9.10748	7.72706	0.023171	0.0076907	0.22604	0.42907	0.4941	0.12832	0.053267	Rank3
MICALL1	MICAL-like 1	late endosome|extrinsic component of membrane|late endosome membrane|recycling endosome membrane|	protein targeting to membrane|endocytosis|receptor-mediated endocytosis|neuron projection development|slow endocytic recycling|protein localization to endosome|membrane tubulation|retrograde transport, endosome to plasma membrane|	protein binding|zinc ion binding|Rab GTPase binding|identical protein binding|phosphatidic acid binding|	5.44244	6.33899	6.48584	0.035907	0.5348	0.015831	0.43734	0.31217	0.4419	0.41786	Rank3
HEXA	hexosaminidase A (alpha polypeptide)	membrane|lysosomal lumen|extracellular vesicular exosome|	skeletal system development|carbohydrate metabolic process|sphingolipid metabolic process|glycosphingolipid metabolic process|ganglioside catabolic process|lysosome organization|sensory perception of sound|adult walking behavior|cell death|lipid storage|sexual reproduction|glycosaminoglycan metabolic process|chondroitin sulfate metabolic process|chondroitin sulfate catabolic process|hyaluronan me…	beta-N-acetylhexosaminidase activity|protein heterodimerization activity|	73.5379	81.6171	75.5288	0.046088	0.039288	0.20277	0.8417	0.66575	0.70904	0.11189	Rank3
RAB17	RAB17, member RAS oncogene family	intracellular|basolateral plasma membrane|apical plasma membrane|dendrite|melanosome|neuronal cell body|recycling endosome|recycling endosome membrane|extracellular vesicular exosome|	immunoglobulin transcytosis in epithelial cells mediated by polymeric immunoglobulin receptor|small GTPase mediated signal transduction|protein transport|establishment of melanosome localization|melanosome transport|endocytic recycling|transcytosis|filopodium assembly|regulation of dendrite development|regulation of filopodium assembly|regulation of synapse assembly|	GTP binding|GDP binding|	12.9116	13.4632	15.7914	0.037915	0.57419	0.010461	0.32304	0.57581	0.071385	0.36576	Rank3
SAFB	scaffold attachment factor B	nucleus|	chromatin organization|transcription, DNA-templated|intracellular estrogen receptor signaling pathway|growth|hormone metabolic process|positive regulation of transcription from RNA polymerase II promoter|	nucleotide binding|core promoter binding|chromatin binding|double-stranded DNA binding|protein binding|poly(A) RNA binding|	158.78	176.802	212.312	0.018541	0.010619	0.62906	0.25758	0.20742	0.15516	0.06982	Rank3
MTPAP	mitochondrial poly(A) polymerase	nucleus|cytoplasm|mitochondrion|Golgi apparatus|plasma membrane|	transcription, DNA-templated|mRNA polyadenylation|cell death|histone mRNA catabolic process|	magnesium ion binding|UTP binding|polynucleotide adenylyltransferase activity|protein binding|ATP binding|manganese ion binding|identical protein binding|protein homodimerization activity|poly(A) RNA binding|	8.69418	8.63132	8.99092	0.016701	0.0085582	0.8316	0.45109	0.45157	0.25505	0.86893	Rank3
NDUFAF5	NADH dehydrogenase (ubiquinone) complex I, assembly factor 5	extrinsic component of mitochondrial inner membrane|	methylation|mitochondrial respiratory chain complex I assembly|	molecular_function|methyltransferase activity|	10.6398	10.1766	12.9255	0.02958	0.80988	0.0088774	0.41514	0.21216	0.97819	0.75789	Rank3
ACSL5	acyl-CoA synthetase long-chain family member 5	nucleus|nucleolus|mitochondrion|mitochondrial outer membrane|mitochondrial inner membrane|endoplasmic reticulum|endoplasmic reticulum membrane|membrane|integral component of membrane|	long-chain fatty acid metabolic process|long-chain fatty acid metabolic process|triglyceride biosynthetic process|long-chain fatty-acyl-CoA biosynthetic process|cellular lipid metabolic process|small molecule metabolic process|regulation of extrinsic apoptotic signaling pathway|	long-chain fatty acid-CoA ligase activity|long-chain fatty acid-CoA ligase activity|ATP binding|	68.6114	79.5893	89.2451	0.031449	0.0076376	0.85598	0.60368	0.44278	0.24129	0.41786	Rank3
FANCD2	Fanconi anemia, complementation group D2	condensed chromosome|nucleus|nucleoplasm|Golgi apparatus|intracellular membrane-bounded organelle|	DNA repair|synapsis|gamete generation|response to gamma radiation|	protein binding|DNA polymerase binding|	30.118	29.6318	29.6141	0.017912	0.95374	0.0024355	0.6925	0.86568	0.38185	0.47403	Rank3
ATPAF1	ATP synthase mitochondrial F1 complex assembly factor 1	mitochondrion|	protein complex assembly|	protein binding|	44.0059	47.6019	46.5766	0.04558	0.018212	0.35906	0.774	0.52038	0.43179	0.3012	Rank3
LEMD3	LEM domain containing 3	nuclear inner membrane|integral component of nuclear inner membrane|membrane|integral component of membrane|	negative regulation of transforming growth factor beta receptor signaling pathway|negative regulation of BMP signaling pathway|negative regulation of activin receptor signaling pathway|skeletal muscle cell differentiation|regulation of cell cycle|	nucleotide binding|DNA binding|protein binding|	7.70417	8.71144	9.10004	0.047151	0.88054	0.014209	0.92851	0.44278	0.92961	0.85655	Rank3
KLK7	kallikrein-related peptidase 7	extracellular region|epidermal lamellar body|	proteolysis|epidermis development|extracellular matrix disassembly|extracellular matrix organization|	serine-type endopeptidase activity|serine-type peptidase activity|	8.44005	8.53423	7.80019	0.035906	0.0077438	0.19683	0.57872	0.89319	0.25175	0.39623	Rank3
OPA1	optic atrophy 1 (autosomal dominant)	mitochondrion|mitochondrial outer membrane|mitochondrial inner membrane|mitochondrial intermembrane space|membrane|integral component of membrane|mitochondrial crista|dendrite|	mitochondrial fission|neural tube closure|GTP catabolic process|GTP catabolic process|apoptotic process|mitochondrion organization|mitochondrion organization|inner mitochondrial membrane organization|visual perception|mitochondrial fusion|mitochondrial fusion|mitochondrial fusion|axon transport of mitochondrion|negative regulation of release of cytochrome c from mitochondria|cellular senescence|	magnesium ion binding|GTPase activity|protein binding|GTP binding|	166.544	172.494	172.951	0.00010546	0.1505	0.0084032	0.58984	0.41552	0.59524	0.1261	Rank3
TRIP10	thyroid hormone receptor interactor 10	phagocytic cup|nucleus|cytoplasm|lysosome|Golgi apparatus|cytosol|cytoskeleton|cell cortex|cell projection|intracellular membrane-bounded organelle|perinuclear region of cytoplasm|extracellular vesicular exosome|	endocytosis|cell communication|signal transduction|small GTPase mediated signal transduction|actin cytoskeleton organization|regulation of small GTPase mediated signal transduction|	protein binding|lipid binding|identical protein binding|	81.789	88.7394	88.6239	0.031809	0.15475	0.21072	0.090383	0.3358	0.0021069	0.086664	Rank3
TNFAIP1	tumor necrosis factor, alpha-induced protein 1 (endothelial)	nucleolus|cytoplasm|endosome|Cul3-RING ubiquitin ligase complex|	DNA replication|apoptotic process|immune response|embryo development|cell migration|protein ubiquitination|protein ubiquitination|negative regulation of Rho protein signal transduction|stress fiber assembly|proteasome-mediated ubiquitin-dependent protein catabolic process|positive regulation of DNA replication|protein homooligomerization|	ubiquitin-protein transferase activity|protein binding|GTP-Rho binding|protein domain specific binding|	6.15166	6.74251	8.12292	0.02958	0.016143	0.20227	0.97441	0.7737	0.92961	0.36576	Rank3
MRPL54	mitochondrial ribosomal protein L54	mitochondrion|ribosome|	None	poly(A) RNA binding|	15.1368	14.6055	17.4934	0.022929	0.82544	0.006611	0.94569	0.45157	0.95975	0.85501	Rank3
GDI2	GDP dissociation inhibitor 2	cytoplasm|Golgi apparatus|cytosol|membrane|extracellular vesicular exosome|	signal transduction|small GTPase mediated signal transduction|protein transport|positive regulation of Rab GTPase activity|regulation of small GTPase mediated signal transduction|	Rab GDP-dissociation inhibitor activity|Rab GTPase activator activity|protein binding|poly(A) RNA binding|	166.975	166.256	177.572	0.010625	0.017892	0.2077	0.87503	0.56092	0.83515	0.1546	Rank3
PEX16	peroxisomal biogenesis factor 16	peroxisome|peroxisomal membrane|integral component of peroxisomal membrane|integral component of peroxisomal membrane|endoplasmic reticulum|endoplasmic reticulum membrane|membrane|	protein targeting to peroxisome|peroxisome organization|peroxisome membrane biogenesis|protein import into peroxisome matrix|protein to membrane docking|ER-dependent peroxisome organization|protein import into peroxisome membrane|protein localization to endoplasmic reticulum|	protein binding|protein C-terminus binding|	11.9379	12.8582	14.2916	0.0089939	0.017139	0.65597	0.91198	0.9533	0.89473	0.44393	Rank3
MELK	maternal embryonic leucine zipper kinase	plasma membrane|cell cortex|membrane|	G2/M transition of mitotic cell cycle|apoptotic process|cell proliferation|intrinsic apoptotic signaling pathway in response to oxidative stress|peptidyl-tyrosine phosphorylation|peptidyl-tyrosine phosphorylation|hemopoiesis|positive regulation of apoptotic process|protein autophosphorylation|neural precursor cell proliferation|	protein serine/threonine kinase activity|non-membrane spanning protein tyrosine kinase activity|calcium ion binding|protein binding|ATP binding|lipid binding|	95.3437	93.3104	87.3433	0.031809	0.029416	0.47622	0.26443	0.74253	0.068751	0.3012	Rank3
NFS1	NFS1 cysteine desulfurase	nucleus|cytoplasm|mitochondrion|mitochondrial matrix|mitochondrial matrix|cytosol|cytosol|	sulfur amino acid metabolic process|protein complex assembly|cysteine metabolic process|vitamin metabolic process|water-soluble vitamin metabolic process|Mo-molybdopterin cofactor biosynthetic process|iron incorporation into metallo-sulfur cluster|molybdopterin cofactor biosynthetic process|small molecule metabolic process|	protein binding|pyridoxal phosphate binding|cysteine desulfurase activity|cysteine desulfurase activity|cysteine desulfurase activity|protein homodimerization activity|	17.3797	20.5544	19.4183	0.0040406	0.00038053	0.64968	0.92466	0.43379	0.93241	0.83077	Rank3
AGFG1	ArfGAP with FG repeats 1	nuclear pore|cytoplasmic membrane-bounded vesicle|intracellular membrane-bounded organelle|	mRNA export from nucleus|multicellular organismal development|spermatogenesis|cell differentiation|regulation of ARF GTPase activity|positive regulation of GTPase activity|	DNA binding|RNA binding|protein binding|ARF GTPase activator activity|zinc ion binding|	27.7545	28.8753	24.8353	0.035189	0.11179	0.11226	0.28176	0.23608	0.41709	0.0098125	Rank1
CCNB2	cyclin B2	nucleoplasm|centrosome|cytosol|microtubule cytoskeleton|membrane|	regulation of cyclin-dependent protein serine/threonine kinase activity|G2/M transition of mitotic cell cycle|mitotic cell cycle|in utero embryonic development|mitotic nuclear division|mitotic nuclear envelope disassembly|growth|T cell homeostasis|thymus development|regulation of cell cycle|	protein binding|protein kinase binding|	50.9921	52.5236	48.4126	0.039686	0.0014546	0.33317	0.376	0.51842	0.19936	0.18045	Rank3
SFN	stratifin	extracellular space|nucleus|cytoplasm|cytosol|cytoplasmic vesicle membrane|extracellular vesicular exosome|	regulation of cyclin-dependent protein serine/threonine kinase activity|release of cytochrome c from mitochondria|negative regulation of protein kinase activity|apoptotic process|signal transduction|negative regulation of cell proliferation|intrinsic apoptotic signaling pathway in response to DNA damage|regulation of epidermal cell division|keratinocyte differentiation|positive regulation of cell…	protein binding|protein kinase C inhibitor activity|protein kinase binding|protein domain specific binding|phosphoprotein binding|	28.2248	28.1545	29.0255	0.027934	0.34825	0.02912	0.72254	0.45157	0.5693	0.071899	Rank3
PABPC4	poly(A) binding protein, cytoplasmic 4 (inducible form)	nucleus|cytoplasm|cytoplasmic stress granule|ribonucleoprotein complex|	RNA processing|RNA catabolic process|translation|blood coagulation|	nucleotide binding|protein binding|poly(A) binding|poly(U) RNA binding|poly(A) RNA binding|	561.493	525.672	508.816	0.035907	0.012786	0.34247	0.31287	0.3924	0.11176	0.071899	Rank3
NETO2	neuropilin (NRP) and tolloid (TLL)-like 2	kainate selective glutamate receptor complex|	regulation of kainate selective glutamate receptor activity|	None	4.72075	5.56386	5.3767	0.011051	0.0075231	0.65126	0.32304	0.45157	0.11767	0.17189	Rank3
ELL	elongation factor RNA polymerase II	nucleoplasm|transcription elongation factor complex|Cajal body|nuclear speck|	in utero embryonic development|transcription from RNA polymerase II promoter|transcription elongation from RNA polymerase II promoter|gene expression|negative regulation of phosphatase activity|viral process|positive regulation of DNA-templated transcription, elongation|positive regulation of viral transcription|	protein binding|phosphatase binding|	3.09745	3.17312	3.35587	0.044032	0.057684	0.010187	0.38886	0.15072	0.8314	0.23204	Rank3
MGME1	mitochondrial genome maintenance exonuclease 1	mitochondrion|	mitochondrial genome maintenance|DNA catabolic process, exonucleolytic|DNA catabolic process, exonucleolytic|mitochondrial DNA replication|mitochondrial DNA repair|	single-stranded DNA exodeoxyribonuclease activity|	26.0352	22.978	26.7726	0.032477	0.67858	0.016033	0.98924	0.77593	0.97271	0.605	Rank3
COQ7	coenzyme Q7 homolog, ubiquinone (yeast)	nucleus|mitochondrial inner membrane|	age-dependent response to oxidative stress|in utero embryonic development|neural tube formation|ubiquinone biosynthetic process|ubiquinone biosynthetic process|determination of adult lifespan|neurogenesis|cellular response to oxidative stress|mitochondrial ATP synthesis coupled electron transport|small molecule metabolic process|mitochondrion morphogenesis|	metal ion binding|	20.5728	22.3663	23.3296	0.022596	0.5574	0.0063498	0.22628	0.14127	0.46092	0.43532	Rank3
PEX5	peroxisomal biogenesis factor 5	intracellular|cytoplasm|mitochondrion|peroxisome|peroxisomal membrane|peroxisomal matrix|Golgi apparatus|cytosol|membrane|protein complex|	very long-chain fatty acid metabolic process|neuron migration|protein targeting to peroxisome|protein targeting to peroxisome|fatty acid beta-oxidation|mitochondrial membrane organization|endoplasmic reticulum organization|protein import into peroxisome matrix|protein import into peroxisome matrix|protein import into peroxisome matrix|protein import into peroxisome matrix, docking|protein import …	peroxisome targeting sequence binding|peroxisome matrix targeting signal-1 binding|peroxisome matrix targeting signal-1 binding|peroxisome matrix targeting signal-1 binding|protein binding|protein C-terminus binding|enzyme binding|small GTPase binding|protein N-terminus binding|	37.9199	38.0291	39.2442	0.021567	0.40293	0.010323	0.80205	0.56092	0.7203	0.11033	Rank3
MOB1A	MOB kinase activator 1A	cytosol|extracellular vesicular exosome|	hippo signaling|hippo signaling|	protein binding|metal ion binding|	50.2758	55.0634	50.5534	0.0068349	0.00047239	0.69076	0.53719	0.46679	0.05227	0.78084	Rank3
MTG1	mitochondrial ribosome-associated GTPase 1	mitochondrial inner membrane|mitochondrial matrix|mitochondrial ribosome|	GTP catabolic process|ribosome biogenesis|regulation of respiratory system process|regulation of mitochondrial translation|	GTPase activity|GTPase activity|GTP binding|	4.39331	4.8501	5.40657	0.030152	0.30502	0.0041363	0.16196	0.10162	0.10428	0.052325	Rank3
NIPSNAP1	nipsnap homolog 1 (C. elegans)	mitochondrion|mitochondrial inner membrane|synaptic membrane|	sensory perception of pain|	neurotransmitter binding|	46.8633	50.1782	46.4896	0.043034	0.0068519	0.86289	0.75768	0.71157	0.81442	0.89647	Rank3
TRIM35	tripartite motif containing 35	nucleus|nucleus|cytoplasm|cytoplasm|	apoptotic process|negative regulation of cell proliferation|positive regulation of apoptotic process|innate immune response|negative regulation of mitotic cell cycle|negative regulation of viral release from host cell|	molecular_function|zinc ion binding|	2.32449	2.37784	2.58566	0.018757	0.76466	0.027019	0.61752	0.52235	0.77071	0.18905	Rank3
CDC37	cell division cycle 37	cytoplasm|cytosol|ruffle membrane|protein complex|extracellular vesicular exosome|	regulation of cyclin-dependent protein serine/threonine kinase activity|protein targeting|regulation of interferon-gamma-mediated signaling pathway|regulation of type I interferon-mediated signaling pathway|	protein binding|heat shock protein binding|mitogen-activated protein kinase kinase kinase binding|protein kinase B binding|unfolded protein binding|chaperone binding|Hsp90 protein binding|	169.007	181.692	182.07	0.019201	0.036255	0.13546	0.92364	0.4559	0.92768	0.05427	Rank3
A4GALT	alpha 1,4-galactosyltransferase	Golgi stack|membrane|integral component of Golgi membrane|extracellular vesicular exosome|	protein glycosylation|glycosphingolipid biosynthetic process|plasma membrane organization|	galactosyltransferase activity|lactosylceramide 4-alpha-galactosyltransferase activity|	3.74032	4.37469	3.80619	0.045053	0.043274	0.16155	0.2661	0.18374	0.54559	0.058228	Rank3
RMND1	required for meiotic nuclear division 1 homolog (S. cerevisiae)	mitochondrion|	translation|	None	73.3003	78.1852	67.4626	0.016897	0.38896	0.0038135	0.80003	0.3924	0.93241	0.23631	Rank3
ACAA1	acetyl-CoA acyltransferase 1	peroxisome|peroxisomal matrix|membrane|intracellular membrane-bounded organelle|	very long-chain fatty acid metabolic process|fatty acid beta-oxidation|bile acid metabolic process|fatty acid beta-oxidation using acyl-CoA oxidase|unsaturated fatty acid metabolic process|alpha-linolenic acid metabolic process|cellular lipid metabolic process|small molecule metabolic process|	acetyl-CoA C-acyltransferase activity|protein binding|palmitoyl-CoA oxidase activity|	52.7766	51.58	53.4218	0.043527	0.048843	0.39924	0.94873	0.43831	0.92961	0.86746	Rank3
POLR2C	polymerase (RNA) II (DNA directed) polypeptide C, 33kDa	nucleus|nucleoplasm|DNA-directed RNA polymerase II, core complex|cytoplasm|microtubule cytoskeleton|	mRNA splicing, via spliceosome|DNA repair|transcription-coupled nucleotide-excision repair|nucleotide-excision repair|transcription from RNA polymerase II promoter|transcription from RNA polymerase II promoter|transcription initiation from RNA polymerase II promoter|transcription elongation from RNA polymerase II promoter|7-methylguanosine mRNA capping|RNA splicing|gene expression|viral process|p…	RNA polymerase II activity|DNA binding|protein dimerization activity|	41.7479	49.3755	53.8719	0.0055581	0.3198	0.006611	0.36729	0.57216	0.31399	0.055241	Rank3
C14orf93	chromosome 14 open reading frame 93	extracellular region|	None	poly(A) RNA binding|	6.4986	6.45378	5.99833	0.018758	0.047388	0.34986	0.26443	0.14598	0.42355	0.05427	Rank3
PTGR2	prostaglandin reductase 2	cytoplasm|extracellular vesicular exosome|	prostaglandin metabolic process|oxidation-reduction process|	13-prostaglandin reductase activity|15-oxoprostaglandin 13-oxidase activity|	12.2872	10.8733	10.5325	0.046644	0.14351	0.02912	0.97573	0.49829	0.95914	0.33133	Rank3
SLC38A10	solute carrier family 38, member 10	Golgi apparatus|integral component of membrane|	sodium ion transport|amino acid transport|bone development|	None	25.8413	32.521	34.0717	0.031449	0.5574	0.048911	0.94873	0.53031	0.92961	0.88325	Rank3
ZCCHC8	zinc finger, CCHC domain containing 8	nucleus|nucleoplasm|catalytic step 2 spliceosome|	mRNA splicing, via spliceosome|	protein binding|zinc ion binding|poly(A) RNA binding|	11.3303	9.20167	9.47159	0.043526	0.0074087	0.25843	0.94086	0.47318	0.96156	0.05427	Rank3
CCT4	chaperonin containing TCP1, subunit 4 (delta)	zona pellucida receptor complex|nucleus|cytoplasm|centrosome|cytosol|chaperonin-containing T-complex|microtubule|melanosome|cell body|extracellular vesicular exosome|	protein folding|binding of sperm to zona pellucida|cellular protein metabolic process|'de novo' posttranslational protein folding|	protein binding|ATP binding|poly(A) RNA binding|unfolded protein binding|	185.914	176.009	164.476	0.0054529	0.00047239	0.76031	0.92159	0.42482	0.92769	0.82344	Rank3
SPAG7	sperm associated antigen 7	nucleus|	None	nucleic acid binding|	20.2004	22.4189	19.3694	0.018541	0.014152	0.64519	0.92466	0.56844	0.73325	0.30985	Rank3
SMARCA5	SWI/SNF related, matrix associated, actin dependent regulator of chromatin, subfamily a, member 5	condensed chromosome|nucleus|nucleoplasm|chromatin silencing complex|NURF complex|RSF complex|nuclear replication fork|	chromatin silencing at rDNA|ATP catabolic process|double-strand break repair|nucleosome assembly|nucleosome assembly|chromatin remodeling|DNA-templated transcription, initiation|regulation of transcription from RNA polymerase II promoter|embryo development|nucleosome positioning|centromere-specific nucleosome assembly|ATP-dependent chromatin remodeling|	DNA binding|helicase activity|protein binding|ATP binding|ATPase activity|nucleosome binding|histone binding|	21.038	21.1565	20.319	0.035189	0.12505	0.025367	0.95709	0.57216	0.97179	0.30985	Rank3
RGPD6	RANBP2-like and GRIP domain containing 6	cytoplasm|	protein targeting to Golgi|	None	11.1964	11.9543	11.0147	0.03923	0.19572	0.072046	0.47327	0.43379	0.13995	0.036927	Rank1
AURKB	aurora kinase B	condensed chromosome, centromeric region|condensed nuclear chromosome, centromeric region|nucleus|spindle|cytosol|chromocenter|midbody|midbody|chromosome passenger complex|chromosome passenger complex|intercellular bridge|	negative regulation of transcription from RNA polymerase II promoter|mitotic cell cycle|negative regulation of B cell apoptotic process|protein phosphorylation|aging|cell proliferation|attachment of spindle microtubules to kinetochore|abscission|histone modification|anaphase-promoting complex-dependent proteasomal ubiquitin-dependent protein catabolic process|cytokinesis checkpoint|spindle checkp…	protein serine/threonine kinase activity|protein serine/threonine/tyrosine kinase activity|protein binding|ATP binding|histone serine kinase activity|metal ion binding|	113.453	99.9524	102.675	0.019876	0.0026329	0.83516	0.074011	0.31217	0.30381	0.55427	Rank3
POLR3C	polymerase (RNA) III (DNA directed) polypeptide C (62kD)	nucleus|nucleoplasm|DNA-directed RNA polymerase III complex|DNA-directed RNA polymerase III complex|cytosol|	regulation of transcription from RNA polymerase III promoter|transcription from RNA polymerase III promoter|transcription elongation from RNA polymerase III promoter|termination of RNA polymerase III transcription|gene expression|positive regulation of type I interferon production|positive regulation of interferon-beta production|innate immune response|positive regulation of innate immune respons…	RNA polymerase III activity|DNA binding|DNA-directed RNA polymerase activity|	7.44884	7.00838	6.84728	0.0011462	0.18493	0.0024355	0.6064	0.43379	0.26737	0.36153	Rank3
NUDT2	nudix (nucleoside diphosphate linked moiety X)-type motif 2	mitochondrion|	nucleobase-containing compound metabolic process|apoptotic process|	bis(5'-nucleosyl)-tetraphosphatase (asymmetrical) activity|GTP binding|bis(5'-nucleosyl)-tetraphosphatase (symmetrical) activity|	32.2636	36.8666	31.4836	0.048837	0.27742	0.069043	0.46772	0.78258	0.077833	0.01608	Rank1
ACSF2	acyl-CoA synthetase family member 2	mitochondrion|	fatty acid metabolic process|	ATP binding|ligase activity|	13.648	16.3316	15.6387	0.048837	0.63911	0.019422	0.96023	0.54202	0.94581	0.96659	Rank3
NDUFA9	NADH dehydrogenase (ubiquinone) 1 alpha subcomplex, 9, 39kDa	nucleus|mitochondrial inner membrane|mitochondrial respiratory chain complex I|mitochondrial matrix|mitochondrial membrane|	mitochondrial electron transport, NADH to ubiquinone|sodium ion transport|respiratory electron transport chain|cellular metabolic process|small molecule metabolic process|	NADH dehydrogenase activity|NADH dehydrogenase activity|protein binding|NADH dehydrogenase (ubiquinone) activity|protein complex binding|coenzyme binding|	74.1778	71.3808	74.5778	0.02293	0.046708	0.13315	0.52875	0.4559	0.13995	0.43532	Rank3
SRSF11	serine/arginine-rich splicing factor 11	nucleus|nucleoplasm|	mRNA splicing, via spliceosome|transcription from RNA polymerase II promoter|termination of RNA polymerase II transcription|mRNA processing|mRNA export from nucleus|RNA splicing|gene expression|mRNA 3'-end processing|	nucleotide binding|protein binding|poly(A) RNA binding|	116.811	110.201	114.367	0.0013977	0.0005232	0.2609	0.94086	0.46031	0.93678	0.82344	Rank3
ANKRD28	ankyrin repeat domain 28	nucleoplasm|	None	protein binding|	24.6761	27.4621	25.3852	0.035544	0.093769	0.061529	0.35244	0.4559	0.43284	0.0085382	Rank1
CYB5B	cytochrome b5 type B (outer mitochondrial membrane)	mitochondrial outer membrane|membrane|integral component of membrane|	oxidation-reduction process|	heme binding|metal ion binding|	417.975	521.549	453.247	0.0012781	0.016143	0.34586	0.57317	0.45373	0.1963	0.086664	Rank3
GFOD2	glucose-fructose oxidoreductase domain containing 2	proteinaceous extracellular matrix|	extracellular matrix organization|oxidation-reduction process|	oxidoreductase activity|	5.06752	5.36236	5.47427	0.039686	0.96434	0.019642	0.7145	0.99897	0.44977	0.43095	Rank3
FAM185A	family with sequence similarity 185, member A	None	None	None	2.95569	3.37691	2.61145	0.032848	0.84312	0.019014	0.58703	0.47318	0.17493	0.40492	Rank3
ACO2	aconitase 2, mitochondrial	nucleus|mitochondrion|mitochondrial matrix|	generation of precursor metabolites and energy|tricarboxylic acid cycle|tricarboxylic acid cycle|tricarboxylic acid cycle|citrate metabolic process|isocitrate metabolic process|cell death|cellular metabolic process|small molecule metabolic process|	aconitate hydratase activity|iron ion binding|3 iron, 4 sulfur cluster binding|4 iron, 4 sulfur cluster binding|	287.201	313.576	303.323	0.027707	0.28693	0.010187	0.66482	0.42932	0.75178	0.49098	Rank3
DDX18	DEAD (Asp-Glu-Ala-Asp) box polypeptide 18	nucleolus|membrane|	ATP catabolic process|ATP catabolic process|	ATP-dependent RNA helicase activity|protein binding|ATP binding|poly(A) RNA binding|	57.9493	54.2055	53.2326	0.00036103	0.83976	0.00024763	0.82553	0.42482	0.8816	0.635	Rank3
STUB1	STIP1 homology and U-box containing protein 1, E3 ubiquitin protein ligase	ubiquitin ligase complex|nucleus|cytoplasm|cytosol|plasma membrane|ubiquitin conjugating enzyme complex|nuclear inclusion body|intermediate filament cytoskeleton|extracellular vesicular exosome|	protein polyubiquitination|protein polyubiquitination|DNA repair|ubiquitin-dependent protein catabolic process|misfolded or incompletely synthesized protein catabolic process|transforming growth factor beta receptor signaling pathway|negative regulation of transforming growth factor beta receptor signaling pathway|ubiquitin-dependent SMAD protein catabolic process|positive regulation of protein u…	ubiquitin-protein transferase activity|ubiquitin-protein transferase activity|ubiquitin-protein transferase activity|protein binding|ligase activity|enzyme binding|kinase binding|Hsp70 protein binding|protein binding, bridging|TPR domain binding|ubiquitin protein ligase binding|ubiquitin-ubiquitin ligase activity|protein homodimerization activity|SMAD binding|misfolded protein binding|Hsp90 prote…	58.9252	64.1644	71.5013	0.036692	0.74532	0.019422	0.73036	0.54202	0.38185	0.29259	Rank3
SGK3	serum/glucocorticoid regulated kinase family, member 3	None	None	None	14.8225	16.5415	15.0911	0.031119	0.049585	0.10768	0.60368	0.7621	0.14659	0.24928	Rank3
TLCD1	TLC domain containing 1	plasma membrane|integral component of membrane|	None	None	7.16857	6.93562	9.17836	0.046644	0.038653	0.34884	0.40752	0.42932	0.073863	0.49926	Rank3
HNRNPC	heterogeneous nuclear ribonucleoprotein C (C1/C2)	nuclear chromatin|nucleus|nucleoplasm|spliceosomal complex|cytosol|membrane|protein complex|extracellular vesicular exosome|catalytic step 2 spliceosome|	mRNA splicing, via spliceosome|mRNA splicing, via spliceosome|osteoblast differentiation|RNA splicing|gene expression|ATP-dependent chromatin remodeling|3'-UTR-mediated mRNA stabilization|	nucleotide binding|RNA polymerase II core promoter proximal region sequence-specific DNA binding|RNA polymerase II distal enhancer sequence-specific DNA binding|RNA binding|mRNA 3'-UTR binding|protein binding|poly(U) RNA binding|nucleosomal DNA binding|identical protein binding|poly(A) RNA binding|	2966.77	3124.33	3246.61	0.0058378	0.0031097	0.68324	0.92159	0.42022	0.93678	0.83077	Rank3
HS6ST2	heparan sulfate 6-O-sulfotransferase 2	Golgi membrane|integral component of membrane|extracellular vesicular exosome|	carbohydrate metabolic process|glycosaminoglycan biosynthetic process|glycosaminoglycan metabolic process|small molecule metabolic process|	sulfotransferase activity|	10.1963	11.8235	11.1218	0.047151	0.075546	0.23729	0.062439	0.084936	0.30598	0.049732	Rank1
BUD13	BUD13 homolog (S. cerevisiae)	nucleus|RES complex|	mRNA splicing, via spliceosome|mRNA export from nucleus|	protein binding|poly(A) RNA binding|	7.56068	6.87996	6.22401	0.04558	0.8363	0.035261	0.58984	0.44278	0.56815	0.33133	Rank3
AK6	TAF9 RNA polymerase II, TATA box binding protein (TBP)-associated factor, 32kDa	PCAF complex|nucleoplasm|transcription factor TFIID complex|STAGA complex|transcription factor TFTC complex|pre-snoRNP complex|MLL1 complex|	chromatin organization|transcription from RNA polymerase II promoter|transcription initiation from RNA polymerase II promoter|transcription elongation from RNA polymerase II promoter|cellular response to DNA damage stimulus|gene expression|viral process|positive regulation of cell growth|negative regulation of proteasomal ubiquitin-dependent protein catabolic process|negative regulation of apopto…	p53 binding|DNA binding|transcription coactivator activity|transcription coactivator activity|histone acetyltransferase activity|protein binding|activating transcription factor binding|transcription regulatory region DNA binding|protein heterodimerization activity|C2H2 zinc finger domain binding|	24.3681	23.5992	19.7324	0.00025685	0.0067446	0.2812	0.86765	0.41105	0.73966	0.082919	Rank3
HMOX2	heme oxygenase (decycling) 2	endoplasmic reticulum membrane|plasma membrane|membrane|	response to hypoxia|porphyrin-containing compound metabolic process|heme oxidation|cellular iron ion homeostasis|response to oxidative stress|heme catabolic process|small molecule metabolic process|transmembrane transport|	heme oxygenase (decyclizing) activity|protein binding|metal ion binding|	89.4046	85.6436	94.4284	0.027707	0.59686	0.0073957	0.48156	0.3358	0.79257	0.098344	Rank3
NUDT16	nudix (nucleoside diphosphate linked moiety X)-type motif 16	nucleus|nucleoplasm|nucleolus|cytoplasm|	adenosine to inosine editing|mRNA catabolic process|proteolysis|positive regulation of cell proliferation|snoRNA catabolic process|dephosphorylation|nucleobase-containing small molecule catabolic process|dITP catabolic process|small molecule metabolic process|IDP catabolic process|nucleobase-containing small molecule metabolic process|positive regulation of cell cycle process|XDP catabolic proces…	magnesium ion binding|mRNA binding|GTP binding|metalloexopeptidase activity|manganese ion binding|snoRNA binding|dITP diphosphatase activity|protein homodimerization activity|m7G(5')pppN diphosphatase activity|cobalt ion binding|inosine-diphosphatase activity|dIDP diphosphatase activity|nucleotide phosphatase activity, acting on free nucleotides|XTP binding|ITP binding|	2.77318	3.12055	2.82969	0.046644	0.0099598	0.58449	0.34552	0.16015	0.46311	0.19763	Rank3
ACBD5	acyl-CoA binding domain containing 5	nucleus|peroxisome|peroxisomal membrane|membrane|integral component of membrane|intracellular membrane-bounded organelle|	transport|biological_process|peroxisome degradation|	fatty-acyl-CoA binding|molecular_function|lipid binding|	72.6661	88.1598	78.8161	0.04715	0.023229	0.37454	0.60368	0.81845	0.49888	0.092	Rank3
EIF4A3	eukaryotic translation initiation factor 4A3	nucleus|cytoplasm|cytosol|membrane|nuclear speck|exon-exon junction complex|catalytic step 2 spliceosome|	nuclear-transcribed mRNA catabolic process, nonsense-mediated decay|nuclear-transcribed mRNA catabolic process, nonsense-mediated decay|nuclear-transcribed mRNA catabolic process, deadenylation-dependent decay|nuclear-transcribed mRNA poly(A) tail shortening|mRNA splicing, via spliceosome|ATP catabolic process|ATP catabolic process|rRNA processing|gene expression|RNA metabolic process|mRNA metabo…	mRNA binding|ATP-dependent RNA helicase activity|protein binding|ATP binding|poly(A) binding|poly(A) RNA binding|	203.791	190.053	243.079	0.041092	0.00075516	0.80888	0.28529	0.41552	0.091232	0.29684	Rank3
CBWD2	COBW domain containing 2	None	None	ATP binding|	109.276	103.782	96.9835	0.034706	0.2934	0.059332	0.10576	0.12696	0.32965	0.0036593	Rank1
SUMF2	sulfatase modifying factor 2	endoplasmic reticulum lumen|	post-translational protein modification|cellular protein metabolic process|	metal ion binding|	430.732	494.125	458.422	0.037083	0.12625	0.14382	0.44279	0.46031	0.042602	0.75789	Rank3
BUB3	BUB3 mitotic checkpoint protein	kinetochore|condensed chromosome kinetochore|nucleus|cytosol|	mitotic sister chromatid segregation|mitotic cell cycle|mitotic spindle assembly checkpoint|meiotic nuclear division|attachment of spindle microtubules to kinetochore|anaphase-promoting complex-dependent proteasomal ubiquitin-dependent protein catabolic process|negative regulation of ubiquitin-protein ligase activity involved in mitotic cell cycle|regulation of ubiquitin-protein ligase activity i…	protein binding|	117.971	126.97	122.7	0.034706	0.80988	0.0060049	0.90743	0.41552	0.92672	0.8215	Rank3
NDEL1	nudE neurodevelopment protein 1-like 1	kinetochore|condensed chromosome kinetochore|nuclear envelope|nucleolus|cytoplasm|centrosome|spindle|cytosol|kinesin complex|microtubule|axon|cell leading edge|cell body|neurofilament cytoskeleton|	microtubule cytoskeleton organization|mitotic cell cycle|neuron migration|inner cell mass cell proliferation|proteolysis|chromosome segregation|retrograde axon cargo transport|cerebral cortex radially oriented cell migration|central nervous system neuron axonogenesis|activation of Cdc42 GTPase activity|positive regulation of axon extension|vesicle transport along microtubule|positive regulation o…	protein binding|microtubule binding|alpha-tubulin binding|beta-tubulin binding|oligopeptidase activity|	18.2794	20.5366	21.9372	0.031119	0.95544	0.0066105	0.12531	0.12696	0.80779	0.052325	Rank3
CAMLG	calcium modulating ligand	endoplasmic reticulum|membrane|integral component of membrane|	receptor recycling|defense response|signal transduction|epidermal growth factor receptor signaling pathway|viral process|	protein binding|cell adhesion molecule binding|	26.2773	25.9352	24.2878	0.039686	0.7009	0.034789	0.29729	0.25044	0.62058	0.057214	Rank3
RBBP8	retinoblastoma binding protein 8	nucleus|nucleolus|transcriptional repressor complex|	cell cycle checkpoint|G1/S transition of mitotic cell cycle|negative regulation of transcription from RNA polymerase II promoter|double-strand break repair via homologous recombination|DNA catabolic process, endonucleolytic|blastocyst hatching|DNA repair|regulation of transcription from RNA polymerase II promoter|mitotic nuclear division|meiotic nuclear division|DNA double-strand break processing…	single-stranded DNA endodeoxyribonuclease activity|RNA polymerase II repressing transcription factor binding|RNA polymerase II transcription corepressor activity|damaged DNA binding|protein binding|	78.0468	71.867	65.3871	0.04715	0.017892	0.39924	0.3266	0.34996	0.26854	0.1261	Rank3
POLR2D	polymerase (RNA) II (DNA directed) polypeptide D	cytoplasmic mRNA processing body|nucleus|nucleoplasm|DNA-directed RNA polymerase II, core complex|	nuclear-transcribed mRNA catabolic process, deadenylation-dependent decay|mRNA splicing, via spliceosome|DNA repair|transcription-coupled nucleotide-excision repair|nucleotide-excision repair|transcription from RNA polymerase II promoter|transcription from RNA polymerase II promoter|transcription from RNA polymerase II promoter|transcription initiation from RNA polymerase II promoter|transcriptio…	nucleotide binding|single-stranded DNA binding|single-stranded RNA binding|DNA-directed RNA polymerase activity|translation initiation factor binding|	21.256	21.2535	18.6343	0.031809	0.038652	0.11503	0.19147	0.14127	0.10751	0.05427	Rank3
ADNP2	ADNP homeobox 2	cellular_component|nucleus|	transcription, DNA-templated|regulation of transcription, DNA-templated|neuron differentiation|positive regulation of cell growth|cellular response to oxidative stress|negative regulation of cell death|cellular response to retinoic acid|	molecular_function|sequence-specific DNA binding transcription factor activity|protein binding|sequence-specific DNA binding|metal ion binding|	12.7949	14.4058	13.5606	0.046644	0.26462	0.0058402	0.72518	0.71818	0.79445	0.18045	Rank3
PPP1R35	protein phosphatase 1, regulatory subunit 35	None	negative regulation of phosphatase activity|	protein phosphatase inhibitor activity|phosphatase binding|	9.23159	11.1798	10.5086	0.020332	0.12625	0.0006931	0.93408	0.41552	0.93331	0.21059	Rank3
TICRR	TOPBP1-interacting checkpoint and replication regulator	nucleus|	cell cycle checkpoint|formation of translation preinitiation complex|DNA replication|DNA repair|response to ionizing radiation|regulation of DNA-dependent DNA replication initiation|mitotic DNA replication checkpoint|	chromatin binding|protein binding|	2.21939	2.15633	2.21578	0.01464	0.031331	0.44669	0.90972	0.41105	0.92961	0.12778	Rank3
GUK1	guanylate kinase 1	cytosol|	purine nucleotide metabolic process|dGDP biosynthetic process|nucleobase-containing small molecule interconversion|drug metabolic process|GDP-mannose metabolic process|glycoprotein transport|small molecule metabolic process|ATP metabolic process|GMP metabolic process|dGMP metabolic process|dATP metabolic process|GDP biosynthetic process|nucleotide phosphorylation|nucleobase-containing small molec…	guanylate kinase activity|ATP binding|	154.904	190.797	202.583	0.031449	0.015849	0.21777	0.93042	0.43379	0.93855	0.1245	Rank3
LETM1	leucine zipper-EF-hand containing transmembrane protein 1	mitochondrion|mitochondrial inner membrane|integral component of membrane|	cristae formation|	calcium ion binding|protein binding|	11.0157	11.4661	11.6668	8.4933e-05	0.80785	0.0010431	0.89407	0.41105	0.95721	0.81195	Rank3
UNC93B1	unc-93 homolog B1 (C. elegans)	Golgi membrane|lysosome|endosome|endosome|endoplasmic reticulum|endoplasmic reticulum membrane|integral component of membrane|early phagosome|	toll-like receptor signaling pathway|intracellular protein transport|toll-like receptor 3 signaling pathway|toll-like receptor 7 signaling pathway|toll-like receptor 9 signaling pathway|innate immune response|defense response to virus|	None	17.1051	20.1113	23.6778	0.027707	0.0074087	0.83516	0.33307	0.14127	0.53116	0.58023	Rank3
RBL2	retinoblastoma-like 2	nucleus|nucleoplasm|transcription factor complex|nucleolus|cytoplasm|extracellular vesicular exosome|	mitotic cell cycle|transcription, DNA-templated|regulation of transcription from RNA polymerase II promoter|chromatin modification|regulation of lipid kinase activity|regulation of cell cycle|	DNA binding|protein binding|	9.95226	10.8177	9.24626	0.02681	0.075547	0.080595	0.33665	0.3782	0.52803	0.0091653	Rank1
VPS11	vacuolar protein sorting 11 homolog (S. cerevisiae)	lysosomal membrane|endosome|endocytic vesicle|HOPS complex|late endosome membrane|	intracellular protein transport|vesicle-mediated transport|	nucleotide binding|protein binding|zinc ion binding|	6.57274	6.63744	6.1621	0.031119	0.0093424	0.53653	0.376	0.46898	0.34453	0.5466	Rank3
KIF1C	kinesin family member 1C	endoplasmic reticulum|Golgi apparatus|kinesin complex|microtubule|	retrograde vesicle-mediated transport, Golgi to ER|microtubule-based movement|metabolic process|metabolic process|cell death|	motor activity|microtubule motor activity|protein binding|ATP binding|microtubule binding|poly(A) RNA binding|	16.0781	17.7487	17.6951	0.0062376	0.12388	0.0037544	0.8821	0.47742	0.84368	0.071899	Rank3
S100A2	S100 calcium binding protein A2	cellular_component|	endothelial cell migration|	calcium ion binding|protein binding|identical protein binding|	14.5762	16.3279	18.0357	0.02011	0.0088533	0.056931	0.39376	0.23608	0.51458	0.41786	Rank3
TCP1	t-complex 1	pericentriolar material|acrosomal vesicle|zona pellucida receptor complex|nuclear heterochromatin|Golgi apparatus|centrosome|cytosol|chaperonin-containing T-complex|microtubule|cell body|extracellular vesicular exosome|	protein folding|tubulin complex assembly|binding of sperm to zona pellucida|cellular protein metabolic process|'de novo' posttranslational protein folding|	protein binding|ATP binding|poly(A) RNA binding|unfolded protein binding|	808.668	801.965	804.282	0.039686	0.15191	0.026986	0.92465	0.41552	0.94582	0.82344	Rank3
POLD3	polymerase (DNA-directed), delta 3, accessory subunit	nucleus|nucleoplasm|mitochondrion|delta DNA polymerase complex|	mitotic cell cycle|telomere maintenance via recombination|telomere maintenance|DNA synthesis involved in DNA repair|DNA strand elongation involved in DNA replication|DNA repair|transcription-coupled nucleotide-excision repair|base-excision repair|nucleotide-excision repair|nucleotide-excision repair, DNA gap filling|nucleotide-excision repair, DNA gap filling|mismatch repair|telomere maintenance …	DNA-directed DNA polymerase activity|protein binding|	10.0905	8.748	8.99165	0.036691	0.026088	0.051604	0.46216	0.41105	0.26292	0.82344	Rank3
QRSL1	glutaminyl-tRNA synthase (glutamine-hydrolyzing)-like 1	mitochondrion|glutamyl-tRNA(Gln) amidotransferase complex|	mitochondrial translation|glutaminyl-tRNAGln biosynthesis via transamidation|	ATP binding|glutaminyl-tRNA synthase (glutamine-hydrolyzing) activity|	3.9561	3.99997	3.35973	0.039686	0.028992	0.25051	0.70913	0.445	0.44535	0.29684	Rank3
FNTA	farnesyltransferase, CAAX box, alpha	cytoplasm|cytosol|microtubule associated complex|CAAX-protein geranylgeranyltransferase complex|protein farnesyltransferase complex|	apoptotic process|cellular component disassembly involved in execution phase of apoptosis|transforming growth factor beta receptor signaling pathway|phototransduction, visible light|rhodopsin mediated signaling pathway|protein farnesylation|protein geranylgeranylation|regulation of rhodopsin mediated signaling pathway|positive regulation of tubulin deacetylation|positive regulation of deacetylase…	protein farnesyltransferase activity|protein farnesyltransferase activity|protein geranylgeranyltransferase activity|CAAX-protein geranylgeranyltransferase activity|protein binding|microtubule binding|alpha-tubulin binding|	51.3435	52.8527	40.6994	0.0083509	0.008998	0.055785	0.58146	0.37355	0.92961	0.39624	Rank3
PAF1	Paf1, RNA polymerase II associated factor, homolog (S. cerevisiae)	Cdc73/Paf1 complex|	negative regulation of transcription from RNA polymerase II promoter|endodermal cell fate commitment|transcription, DNA-templated|mRNA polyadenylation|histone monoubiquitination|Wnt signaling pathway|stem cell maintenance|positive regulation of mRNA 3'-end processing|positive regulation of transcription elongation from RNA polymerase II promoter|histone H2B ubiquitination|negative regulation of m…	RNA polymerase II core binding|chromatin binding|protein binding|	20.4319	23.8243	24.0276	0.00099328	0.05027	0.00041032	0.55377	0.43379	0.56133	0.18905	Rank3
KIAA0586	KIAA0586	cytoplasm|centrosome|ciliary basal body|	smoothened signaling pathway|cilium assembly|cilium morphogenesis|regulation of establishment of protein localization|	None	20.7122	18.1655	15.6613	0.047151	0.12388	0.29667	0.4263	0.23608	0.96446	0.012425	Rank1
WDR75	WD repeat domain 75	nucleus|	None	poly(A) RNA binding|	120.015	112.157	106.306	0.00043031	0.19572	0.010187	0.94086	0.46898	0.94807	0.06982	Rank3
TRAIP	TRAF interacting protein	nucleolus|perinuclear region of cytoplasm|	apoptotic process|signal transduction|cell proliferation|protein ubiquitination|intracellular signal transduction|	receptor signaling protein activity|protein binding|zinc ion binding|ligase activity|	7.13874	6.76108	7.8023	0.012272	0.81393	0.0069816	0.376	0.18374	0.7602	0.092	Rank3
CENPI	centromere protein I	kinetochore|nucleoplasm|cytosol|	mitotic cell cycle|nucleosome assembly|sex differentiation|centromere-specific nucleosome assembly|	protein binding|	4.39889	5.05164	5.24264	0.011794	0.12997	0.040185	0.47327	0.31217	0.92961	0.13477	Rank3
YWHAG	tyrosine 3-monooxygenase/tryptophan 5-monooxygenase activation protein, gamma	cytosol|membrane|cytoplasmic vesicle membrane|extracellular vesicular exosome|	G2/M transition of mitotic cell cycle|mitotic cell cycle|negative regulation of protein kinase activity|protein targeting|apoptotic process|regulation of signal transduction|cellular response to insulin stimulus|regulation of neuron differentiation|regulation of synaptic plasticity|membrane organization|negative regulation of protein serine/threonine kinase activity|intrinsic apoptotic signaling …	protein kinase C binding|insulin-like growth factor receptor binding|protein binding|protein kinase C inhibitor activity|protein domain specific binding|receptor tyrosine kinase binding|poly(A) RNA binding|	37.9631	40.6234	44.0825	0.023415	0.33841	0.059332	0.31287	0.34526	0.32327	0.01469	Rank1
IMPDH2	IMP (inosine 5'-monophosphate) dehydrogenase 2	nucleus|cytoplasm|peroxisomal membrane|cytosol|membrane|extracellular vesicular exosome|	purine nucleobase metabolic process|GMP biosynthetic process|purine ribonucleoside monophosphate biosynthetic process|small molecule metabolic process|nucleobase-containing small molecule metabolic process|oxidation-reduction process|	nucleotide binding|DNA binding|RNA binding|IMP dehydrogenase activity|adenyl nucleotide binding|metal ion binding|	1619.16	1478.33	1368.52	0.0092721	0.0072876	0.38534	0.92658	0.45589	0.92961	0.37447	Rank3
C4orf33	chromosome 4 open reading frame 33	None	None	None	2.74979	2.78744	2.53113	0.039686	0.029416	0.17989	0.53994	0.3782	0.91259	0.29684	Rank3
RPL8	ribosomal protein L8	cytosol|membrane|cytosolic large ribosomal subunit|	nuclear-transcribed mRNA catabolic process, nonsense-mediated decay|translation|translation|translational initiation|translational elongation|translational termination|SRP-dependent cotranslational protein targeting to membrane|gene expression|viral process|RNA metabolic process|mRNA metabolic process|viral life cycle|viral transcription|cellular protein metabolic process|	RNA binding|structural constituent of ribosome|rRNA binding|poly(A) RNA binding|	7548.19	6871.03	6782.63	0.00040003	8.6986e-05	0.31674	0.72777	0.42482	0.54888	0.81965	Rank3
AQR	aquarius intron-binding spliceosomal factor	nucleus|membrane|catalytic step 2 spliceosome|	mRNA splicing, via spliceosome|	protein binding|poly(A) RNA binding|	6.11529	5.63787	4.90054	0.037915	0.011479	0.14293	0.376	0.43379	0.07233	0.83077	Rank3
FBXW11	F-box and WD repeat domain containing 11	ubiquitin ligase complex|nucleus|centrosome|cytosol|cytosol|SCF ubiquitin ligase complex|	G2/M transition of mitotic cell cycle|protein polyubiquitination|mitotic cell cycle|protein dephosphorylation|Wnt signaling pathway|protein ubiquitination|protein ubiquitination|SCF-dependent proteasomal ubiquitin-dependent protein catabolic process|protein destabilization|negative regulation of NF-kappaB import into nucleus|positive regulation of circadian rhythm|proteasome-mediated ubiquitin-de…	ubiquitin-protein transferase activity|ubiquitin-protein transferase activity|protein binding|protein dimerization activity|	34.2021	38.6594	40.3308	0.00047598	0.0010934	0.23998	0.7145	0.44278	0.70325	0.17189	Rank3
ING1	inhibitor of growth family, member 1	nucleus|	protein import into nucleus|cell cycle|negative regulation of cell proliferation|regulation of cell death|chromatin modification|negative regulation of cell growth|positive regulation of transcription, DNA-templated|	protein binding|zinc ion binding|methylated histone binding|	8.39659	9.67122	10.2332	0.0024605	0.81393	0.019422	0.93042	0.59011	0.92961	0.85344	Rank3
USP7	ubiquitin specific peptidase 7 (herpes virus-associated)	nucleus|cytosol|PML body|	transcription-coupled nucleotide-excision repair|ubiquitin-dependent protein catabolic process|multicellular organismal development|maintenance of DNA methylation|viral process|protein deubiquitination|protein deubiquitination|negative regulation of NF-kappaB transcription factor activity|regulation of sequence-specific DNA binding transcription factor activity|	p53 binding|cysteine-type endopeptidase activity|ubiquitin thiolesterase activity|ubiquitin thiolesterase activity|ubiquitin-specific protease activity|ubiquitin-specific protease activity|protein binding|protein C-terminus binding|transcription factor binding|ubiquitin protein ligase binding|	154.202	143.396	170.788	0.0010708	0.057684	0.073715	0.41514	0.46245	0.0090986	0.82344	Rank3
NUP214	nucleoporin 214kDa	nucleus|nuclear pore|nucleoplasm|cytosol|focal adhesion|intracellular membrane-bounded organelle|	mitotic cell cycle|carbohydrate metabolic process|mRNA export from nucleus|protein import into nucleus|protein export from nucleus|mitotic nuclear envelope disassembly|hexose transport|gene expression|regulation of glucose transport|glucose transport|viral process|RNA metabolic process|mRNA metabolic process|cytokine-mediated signaling pathway|small molecule metabolic process|regulation of cell c…	transporter activity|nucleocytoplasmic transporter activity|protein binding|	11.6134	12.312	11.2162	0.031809	0.049585	0.12805	0.8821	0.41552	0.81535	0.075339	Rank3
SLC29A4	solute carrier family 29 (equilibrative nucleoside transporter), member 4	plasma membrane|integral component of membrane|apical plasma membrane|	transmembrane transport|nucleoside transmembrane transport|	nucleoside transmembrane transporter activity|	2.41419	2.80069	3.00113	0.037497	0.15475	0.035812	0.80609	0.67333	0.79732	0.056222	Rank3
RPL31	ribosomal protein L31	cytosol|membrane|cytosolic large ribosomal subunit|extracellular vesicular exosome|	nuclear-transcribed mRNA catabolic process, nonsense-mediated decay|translation|translation|translational initiation|translational elongation|translational termination|SRP-dependent cotranslational protein targeting to membrane|gene expression|viral process|RNA metabolic process|mRNA metabolic process|viral life cycle|viral transcription|cellular protein metabolic process|	RNA binding|structural constituent of ribosome|poly(A) RNA binding|	1767.51	1584.35	1440.24	0.036691	0.0080173	0.061529	0.92058	0.43379	0.93331	0.082918	Rank3
MRPS14	mitochondrial ribosomal protein S14	mitochondrion|mitochondrial ribosome|nuclear membrane|	translation|	structural constituent of ribosome|poly(A) RNA binding|	5.99327	6.37569	5.61834	0.010625	0.19572	0.019422	0.51207	0.42022	0.28481	0.05427	Rank3
NXT1	nuclear transport factor 2-like export factor 1	nuclear pore|cytoplasm|nuclear speck|	RNA export from nucleus|protein export from nucleus|	protein binding|Ran GTPase binding|	5.64481	5.69726	5.79133	0.019876	0.82916	0.018575	0.72777	0.46898	0.58989	0.44823	Rank3
TOMM40	translocase of outer mitochondrial membrane 40 homolog (yeast)	mitochondrial outer membrane translocase complex|integral component of membrane|integral component of mitochondrial outer membrane|pore complex|extracellular vesicular exosome|	protein targeting to mitochondrion|protein targeting to mitochondrion|ion transport|cellular protein metabolic process|protein transmembrane transport|protein transmembrane transport|	protein transmembrane transporter activity|protein transmembrane transporter activity|porin activity|	74.9114	81.1521	76.604	0.00070128	0.31669	0.0054357	0.37903	0.42932	0.15236	0.1261	Rank3
OGDH	oxoglutarate (alpha-ketoglutarate) dehydrogenase (lipoamide)	mitochondrion|mitochondrial matrix|mitochondrial membrane|oxoglutarate dehydrogenase complex|	generation of precursor metabolites and energy|glycolytic process|tricarboxylic acid cycle|2-oxoglutarate metabolic process|succinyl-CoA metabolic process|lysine catabolic process|NADH metabolic process|cerebellar cortex development|striatum development|hippocampus development|thalamus development|pyramidal neuron development|tangential migration from the subventricular zone to the olfactory bulb…	oxoglutarate dehydrogenase (succinyl-transferring) activity|thiamine pyrophosphate binding|heat shock protein binding|oxoglutarate dehydrogenase (NAD+) activity|metal ion binding|chaperone binding|	48.7043	58.4634	57.6132	0.043527	0.25502	0.1497	0.16083	0.060932	0.93331	0.015227	Rank1
BAG1	BCL2-associated athanogene	nucleus|cytoplasm|	apoptotic process|cell surface receptor signaling pathway|intracellular signal transduction|negative regulation of apoptotic process|chaperone cofactor-dependent protein refolding|	receptor signaling protein activity|protein binding|chaperone binding|	35.4624	34.0716	46.1623	0.02378	0.80177	0.0054357	0.67316	0.51842	0.73058	0.41786	Rank3
DNAJC11	DnaJ (Hsp40) homolog, subfamily C, member 11	mitochondrial inner membrane|extracellular vesicular exosome|	None	protein binding|	72.5509	69.9653	76.4031	0.0030065	0.37767	0.00069259	0.90157	0.41105	0.92769	0.81772	Rank3
ALDOC	aldolase C, fructose-bisphosphate	mitochondrion|cytosol|cytoskeleton|axon|extracellular vesicular exosome|	response to hypoxia|carbohydrate metabolic process|fructose metabolic process|glucose metabolic process|gluconeogenesis|glycolytic process|glycolytic process|apoptotic process|aging|response to organonitrogen compound|response to organic cyclic compound|fructose 1,6-bisphosphate metabolic process|epithelial cell differentiation|organ regeneration|small molecule metabolic process|protein homotetra…	fructose-bisphosphate aldolase activity|protein binding|cytoskeletal protein binding|	23.7876	25.8416	21.6911	0.013967	0.27537	0.0047588	0.73036	0.56468	0.45647	0.071899	Rank3
DHFR	dihydrofolate reductase	None	None	None	82.0428	75.1457	65.9964	0.0092721	0.0020186	0.080595	0.60368	0.41552	0.51458	0.35726	Rank3
EXOC4	exocyst complex component 4	exocyst|cytoplasm|plasma membrane|membrane|growth cone membrane|myelin sheath abaxonal region|	vesicle docking involved in exocytosis|protein transport|cellular protein metabolic process|membrane organization|	protein binding|PDZ domain binding|protein N-terminus binding|	24.6355	25.0244	25.4334	0.01503	0.013879	0.13929	0.56486	0.41105	0.31525	0.81581	Rank3
SLC33A1	solute carrier family 33 (acetyl-CoA transporter), member 1	Golgi membrane|endoplasmic reticulum membrane|integral component of plasma membrane|membrane|	transport|cell death|acetyl-CoA transport|acetyl-CoA transport|transmembrane transport|	acetyl-CoA transporter activity|	16.0325	17.0157	17.1318	0.030152	0.036254	0.5075	0.27136	0.57942	0.14659	0.38764	Rank3
RPL39	NA	NA	NA	NA	772.576	666.627	629.786	0.02378	0.82164	0.00060996	0.4539	0.41105	0.15753	0.8271	Rank3
RPL10A	ribosomal protein L10a	nucleus|nucleolus|cytoplasm|cytosol|membrane|cytosolic large ribosomal subunit|extracellular vesicular exosome|	nuclear-transcribed mRNA catabolic process, nonsense-mediated decay|translation|translation|translational initiation|translational elongation|translational termination|SRP-dependent cotranslational protein targeting to membrane|anatomical structure morphogenesis|gene expression|viral process|RNA metabolic process|mRNA metabolic process|viral life cycle|viral transcription|cellular protein metabol…	structural constituent of ribosome|protein binding|poly(A) RNA binding|	1132.02	1087.27	1251.66	0.000146	0.00019989	0.88084	0.376	0.23608	0.92961	0.2535	Rank3
ARIH1	ariadne RBR E3 ubiquitin protein ligase 1	ubiquitin ligase complex|cytoplasm|cytosol|	ubiquitin-dependent protein catabolic process|protein ubiquitination|protein ubiquitination|cytokine-mediated signaling pathway|	ubiquitin-protein transferase activity|protein binding|zinc ion binding|small conjugating protein ligase activity|ubiquitin protein ligase binding|	15.7846	16.9322	15.5351	0.048838	0.37767	0.12736	0.22163	0.11286	0.75497	0.0023409	Rank1
RPS24	ribosomal protein S24	nucleus|nucleolus|cytoplasm|cytosol|small ribosomal subunit|small ribosomal subunit|membrane|cytosolic small ribosomal subunit|	nuclear-transcribed mRNA catabolic process, nonsense-mediated decay|maturation of SSU-rRNA from tricistronic rRNA transcript (SSU-rRNA, 5.8S rRNA, LSU-rRNA)|rRNA processing|translation|translation|translational initiation|translational elongation|translational termination|SRP-dependent cotranslational protein targeting to membrane|gene expression|viral process|RNA metabolic process|mRNA metabolic…	nucleotide binding|structural constituent of ribosome|translation initiation factor binding|poly(A) RNA binding|	6876.78	5267.46	5897.93	0.00043082	3.9259e-05	0.85404	0.48156	0.42482	0.11767	0.20622	Rank3
TRMT112	tRNA methyltransferase 11-2 homolog (S. cerevisiae)	protein complex|extracellular vesicular exosome|	peptidyl-glutamine methylation|	protein binding|protein methyltransferase activity|	240.261	264.178	308.645	0.04558	0.16331	0.036983	0.91741	0.41105	0.92961	0.82344	Rank3
DHX8	DEAH (Asp-Glu-Ala-His) box polypeptide 8	nucleus|spliceosomal complex|catalytic step 2 spliceosome|	mRNA splicing, via spliceosome|ATP catabolic process|ATP catabolic process|RNA processing|RNA splicing|	ATP-dependent RNA helicase activity|protein binding|ATP binding|identical protein binding|poly(A) RNA binding|	17.1416	20.0298	20.348	0.0054534	0.0054278	0.19905	0.69804	0.46898	0.70754	0.091999	Rank3
ZNF561	zinc finger protein 561	nucleus|	transcription, DNA-templated|regulation of transcription, DNA-templated|	DNA binding|metal ion binding|	19.8724	21.06	21.0076	0.035189	0.38045	0.019641	0.68974	0.56092	0.74553	0.14726	Rank3
EIF2A	eukaryotic translation initiation factor 2A, 65kDa	extracellular space|cytoplasm|eukaryotic translation initiation factor 2 complex|blood microparticle|	translational initiation|regulation of translation|protein phosphorylation|positive regulation of signal transduction|SREBP signaling pathway|ribosome assembly|	tRNA binding|translation initiation factor activity|protein binding|ribosome binding|	191.023	183.703	169.881	0.036692	0.46736	0.041183	0.98048	0.46898	0.99703	0.29684	Rank3
RIOK3	RIO kinase 3	None	protein phosphorylation|chromosome segregation|	protein serine/threonine kinase activity|protein binding|ATP binding|	32.8456	31.0213	30.3734	0.030798	0.32856	0.097948	0.30772	0.20742	0.48614	0.0080779	Rank1
PLEKHG2	pleckstrin homology domain containing, family G (with RhoGef domain) member 2	cytosol|	small GTPase mediated signal transduction|positive regulation of Rho GTPase activity|positive regulation of apoptotic process|neurotrophin TRK receptor signaling pathway|regulation of small GTPase mediated signal transduction|apoptotic signaling pathway|	Rho guanyl-nucleotide exchange factor activity|	2.26328	2.54939	2.63868	0.031449	0.040591	0.072465	0.40752	0.3782	0.69243	0.10715	Rank3
MSRA	methionine sulfoxide reductase A	nucleus|mitochondrion|membrane|extracellular vesicular exosome|	cellular protein modification process|methionine metabolic process|response to oxidative stress|protein repair|oxidation-reduction process|	peptide-methionine (S)-S-oxide reductase activity|	3.30929	3.42459	3.68272	0.00074284	0.21761	0.0014265	0.48434	0.32627	0.75857	0.050584	Rank3
ADCY7	adenylate cyclase 7	plasma membrane|plasma membrane|integral component of membrane|	energy reserve metabolic process|cAMP biosynthetic process|water transport|signal transduction|epidermal growth factor receptor signaling pathway|adenylate cyclase-activating G-protein coupled receptor signaling pathway|adenylate cyclase-inhibiting G-protein coupled receptor signaling pathway|activation of phospholipase C activity|synaptic transmission|fibroblast growth factor receptor signaling …	adenylate cyclase activity|ATP binding|metal ion binding|	7.48164	9.24141	9.71002	0.02293	0.0044902	0.19785	0.093753	0.36888	0.12261	0.05427	Rank3
SUPT16H	suppressor of Ty 16 homolog (S. cerevisiae)	nucleus|nucleoplasm|chromosome|	DNA replication|DNA repair|nucleosome disassembly|transcription from RNA polymerase II promoter|transcription elongation from RNA polymerase II promoter|gene expression|viral process|positive regulation of DNA-templated transcription, elongation|positive regulation of viral transcription|	protein binding|poly(A) RNA binding|	114.321	108.309	102.194	0.0115	0.0081764	0.2674	0.91198	0.42932	0.92672	0.29684	Rank3
SNRPG	small nuclear ribonucleoprotein polypeptide G	nucleoplasm|spliceosomal complex|U7 snRNP|U1 snRNP|U4 snRNP|U12-type spliceosomal complex|cytosol|cytosol|small nuclear ribonucleoprotein complex|methylosome|SMN-Sm protein complex|catalytic step 2 spliceosome|	spliceosomal complex assembly|spliceosomal snRNP assembly|spliceosomal snRNP assembly|mRNA splicing, via spliceosome|mRNA splicing, via spliceosome|transcription from RNA polymerase II promoter|termination of RNA polymerase II transcription|histone mRNA metabolic process|RNA splicing|gene expression|RNA metabolic process|mRNA 3'-end processing|ncRNA metabolic process|	protein binding|poly(A) RNA binding|	244.231	245.336	258.872	0.037082	0.016542	0.40917	0.48156	0.43831	0.22258	0.11189	Rank3
SRSF10	serine/arginine-rich splicing factor 10	nucleus|nucleoplasm|cytoplasm|nuclear speck|	spliceosomal tri-snRNP complex assembly|RNA splicing, via transesterification reactions|mRNA splicing, via spliceosome|regulation of transcription, DNA-templated|mRNA splice site selection|mRNA export from nucleus|cytoplasmic transport|negative regulation of mRNA splicing, via spliceosome|	nucleotide binding|RNA binding|protein binding|poly(A) RNA binding|RS domain binding|unfolded protein binding|	110.2	102.317	102.222	0.035544	0.21761	0.001427	0.086845	0.057686	0.32964	0.057214	Rank3
NPIPB3	nuclear pore complex interacting protein family, member B3	cellular_component|integral component of membrane|	biological_process|	molecular_function|	3.10961	3.51144	4.05865	0.0039775	0.00052268	0.27994	0.54265	0.26949	0.93769	0.83077	Rank3
PTP4A1	protein tyrosine phosphatase type IVA, member 1	cytoplasm|early endosome|endoplasmic reticulum|spindle|cytoplasmic side of plasma membrane|extracellular vesicular exosome|	cell cycle|multicellular organismal development|positive regulation of cell migration|peptidyl-tyrosine dephosphorylation|peptidyl-tyrosine dephosphorylation|	protein tyrosine phosphatase activity|	103.577	110.424	83.5711	0.036692	0.0020186	0.60453	0.70361	0.445	0.16795	0.71733	Rank3
TCERG1	transcription elongation regulator 1	nucleus|	negative regulation of transcription from RNA polymerase II promoter|transcription from RNA polymerase II promoter|	RNA polymerase II repressing transcription factor binding|RNA polymerase II transcription corepressor activity|transcription coactivator activity|protein binding|poly(A) RNA binding|proline-rich region binding|	55.7743	54.7386	50.2304	0.037083	0.011479	0.18076	0.64529	0.4559	0.7602	0.1261	Rank3
GPN3	GPN-loop GTPase 3	protein complex|	None	GTP binding|	62.5306	60.1069	54.7152	0.023171	0.0088538	0.93198	0.19288	0.25044	0.15924	0.18475	Rank3
SLC39A7	solute carrier family 39 (zinc transporter), member 7	endoplasmic reticulum membrane|Golgi apparatus|membrane|integral component of membrane|	zinc ion transport|transmembrane transport|	protein binding|metal ion transmembrane transporter activity|	73.2584	82.3582	83.9031	0.035907	0.012785	0.5326	0.13426	0.12224	0.54888	0.10264	Rank3
RRP12	ribosomal RNA processing 12 homolog (S. cerevisiae)	nucleolus|integral component of membrane|nuclear membrane|	None	poly(A) RNA binding|	33.7684	30.2062	36.4909	0.021567	0.46736	0.010187	0.59262	0.4559	0.59888	0.36576	Rank3
VPS28	vacuolar protein sorting 28 homolog (S. cerevisiae)	ESCRT I complex|cytoplasm|endosome|cytosol|plasma membrane|endosome membrane|late endosome membrane|extracellular vesicular exosome|	protein transport|viral process|endosomal transport|viral life cycle|virion assembly|viral protein processing|negative regulation of protein ubiquitination|ubiquitin-dependent protein catabolic process via the multivesicular body sorting pathway|ubiquitin-dependent protein catabolic process via the multivesicular body sorting pathway|membrane organization|intracellular transport of virus|	protein binding|	80.0189	89.9654	75.5496	0.032849	0.42804	0.002573	0.72777	0.47742	0.58756	0.14726	Rank3
ZYG11B	zyg-11 family member B, cell cycle regulator	None	None	None	2.74408	3.02791	2.6821	0.043034	0.5067	0.0037011	0.48156	0.61769	0.13066	0.086664	Rank3
PGP	phosphoglycolate phosphatase	None	carbohydrate metabolic process|dephosphorylation|peptidyl-tyrosine dephosphorylation|	magnesium ion binding|protein tyrosine phosphatase activity|phosphoglycolate phosphatase activity|nucleotide phosphatase activity, acting on free nucleotides|	2.62826	3.10067	3.42279	0.014639	0.52072	0.016396	0.9687	0.57216	0.9585	0.48252	Rank3
C2orf42	chromosome 2 open reading frame 42	None	None	None	7.84275	8.90354	9.00476	0.02825	0.0077443	0.2641	0.89656	0.93997	0.81535	0.3012	Rank3
WDR35	WD repeat domain 35	centrosome|axoneme|intraciliary transport particle A|ciliary basal body|	intraciliary retrograde transport|cilium assembly|	None	4.40494	4.85825	4.76884	0.035189	0.3331	0.10489	0.31109	0.49204	0.038315	0.09342	Rank3
KLHL2	kelch-like family member 2	ruffle|cytoplasm|cytosol|actin cytoskeleton|lamellipodium|Cul3-RING ubiquitin ligase complex|	protein ubiquitination|	actin binding|protein binding|	30.4803	37.8255	32.15	0.048838	0.87914	0.006611	0.15204	0.11751	0.1384	0.14726	Rank3
MRPL17	mitochondrial ribosomal protein L17	mitochondrial inner membrane|ribosome|	translation|	structural constituent of ribosome|protein domain specific binding|	28.1079	30.3652	28.8727	0.027406	0.039288	0.25623	0.20362	0.12224	0.92107	0.40917	Rank3
TXNDC15	thioredoxin domain containing 15	integral component of membrane|	cell redox homeostasis|	None	15.4424	17.9213	19.4877	0.031119	0.018212	0.20873	0.81395	0.52235	0.37759	0.064544	Rank3
EIF3L	eukaryotic translation initiation factor 3, subunit L	fibrillar center|nucleoplasm|eukaryotic translation initiation factor 3 complex|membrane|eukaryotic 43S preinitiation complex|eukaryotic 48S preinitiation complex|	formation of translation preinitiation complex|translational initiation|translational initiation|regulation of translational initiation|	translation initiation factor activity|translation initiation factor activity|protein binding|poly(A) RNA binding|	562.96	535.29	532.836	0.043526	0.017892	0.14723	0.92058	0.41552	0.93678	0.076525	Rank3
ZMYM2	zinc finger, MYM-type 2	cytosol|PML body|	transcription, DNA-templated|regulation of transcription, DNA-templated|biological_process|	zinc ion binding|ubiquitin conjugating enzyme binding|	3.5698	4.2414	3.23105	0.048838	0.03133	0.55857	0.86153	0.46898	0.68133	0.44823	Rank3
TRIO	trio Rho guanine nucleotide exchange factor	cytosol|	protein phosphorylation|transmembrane receptor protein tyrosine phosphatase signaling pathway|small GTPase mediated signal transduction|axon guidance|positive regulation of Rho GTPase activity|positive regulation of apoptotic process|positive regulation of GTPase activity|neurotrophin TRK receptor signaling pathway|regulation of small GTPase mediated signal transduction|apoptotic signaling pathwa…	protein serine/threonine kinase activity|guanyl-nucleotide exchange factor activity|Rho guanyl-nucleotide exchange factor activity|protein binding|ATP binding|enzyme binding|	11.7035	13.1252	13.0698	0.0076771	0.80177	0.002435	0.44832	0.28858	0.37923	0.75063	Rank3
STAU2	staufen double-stranded RNA binding protein 2	nucleolus|endoplasmic reticulum|microtubule|membrane|	transport|	double-stranded RNA binding|protein binding|poly(A) RNA binding|	50.6019	55.4254	49.4027	0.0042038	0.0062201	0.5326	0.92658	0.41552	0.9079	0.82344	Rank3
DGKD	diacylglycerol kinase, delta 130kDa	cytoplasm|plasma membrane|plasma membrane|cytoplasmic membrane-bounded vesicle|	endocytosis|signal transduction|epidermal growth factor receptor signaling pathway|protein kinase C-activating G-protein coupled receptor signaling pathway|multicellular organismal development|blood coagulation|response to organic substance|protein transport|cell growth|phosphorylation|second-messenger-mediated signaling|platelet activation|diacylglycerol metabolic process|diacylglycerol metaboli…	NAD+ kinase activity|diacylglycerol kinase activity|diacylglycerol kinase activity|protein binding|ATP binding|diacylglycerol binding|protein homodimerization activity|metal ion binding|protein heterodimerization activity|	8.25652	8.11485	8.58966	0.0092721	0.10163	0.069044	0.65645	0.74253	0.5052	0.011669	Rank1
ALDH7A1	aldehyde dehydrogenase 7 family, member A1	nucleus|cytoplasm|mitochondrion|mitochondrial matrix|cytosol|extracellular vesicular exosome|	cellular aldehyde metabolic process|lysine catabolic process|sensory perception of sound|glycine betaine biosynthetic process from choline|cellular nitrogen compound metabolic process|small molecule metabolic process|oxidation-reduction process|	aldehyde dehydrogenase (NAD) activity|L-aminoadipate-semialdehyde dehydrogenase activity|protein binding|betaine-aldehyde dehydrogenase activity|	415.02	442.555	406.51	0.031449	0.017892	0.45729	0.54816	0.69498	0.25175	0.37447	Rank3
SYF2	SYF2 pre-mRNA-splicing factor	nucleus|nucleus|catalytic step 2 spliceosome|	mRNA splicing, via spliceosome|in utero embryonic development|gastrulation|embryonic organ development|	poly(A) RNA binding|	35.7234	34.3211	30.2558	0.018338	0.076412	0.29795	0.13985	0.11286	0.15623	0.049731	Rank1
MTRR	5-methyltetrahydrofolate-homocysteine methyltransferase reductase	nucleus|cytoplasm|cytosol|intermediate filament cytoskeleton|	sulfur amino acid metabolic process|DNA methylation|methionine metabolic process|vitamin metabolic process|water-soluble vitamin metabolic process|xenobiotic metabolic process|methionine biosynthetic process|cobalamin metabolic process|methylation|cellular nitrogen compound metabolic process|small molecule metabolic process|folic acid metabolic process|oxidation-reduction process|	iron ion binding|FMN binding|oxidoreductase activity, acting on paired donors, with incorporation or reduction of molecular oxygen, NAD(P)H as one donor, and incorporation of one atom of oxygen|oxidoreductase activity, oxidizing metal ions, NAD or NADP as acceptor|[methionine synthase] reductase activity|flavin adenine dinucleotide binding|flavin adenine dinucleotide binding|NADP binding|	29.269	27.7962	27.7822	0.034706	0.82165	0.010187	0.60368	0.46898	0.66326	0.36576	Rank3
ITFG2	integrin alpha FG-GAP repeat containing 2	None	None	None	6.74481	6.4141	6.85183	0.037083	0.62231	0.036052	0.24707	0.53815	0.15025	0.058228	Rank3
ATXN2L	ataxin 2-like	cytoplasm|cytoplasmic stress granule|membrane|nuclear speck|	regulation of cytoplasmic mRNA processing body assembly|stress granule assembly|	protein binding|poly(A) RNA binding|	85.3669	87.332	85.1784	0.01464	0.15475	0.0048286	0.53994	0.45589	0.37402	0.056223	Rank3
PEX6	peroxisomal biogenesis factor 6	cytoplasm|peroxisome|peroxisomal membrane|cytosol|	ATP catabolic process|protein targeting to peroxisome|peroxisome organization|protein import into peroxisome matrix, translocation|protein stabilization|	protein binding|ATP binding|protein C-terminus binding|ATPase activity|protein complex binding|ATPase activity, coupled|	2.77146	3.28702	3.43016	0.02542	0.19572	0.019237	0.95018	0.44278	0.98188	0.082919	Rank3
CHCHD7	coiled-coil-helix-coiled-coil-helix domain containing 7	mitochondrial intermembrane space|	None	None	27.7442	24.0451	28.5327	0.012433	0.54623	0.036655	0.59821	0.42022	0.57984	0.10408	Rank3
OARD1	O-acyl-ADP-ribose deacylase 1	None	purine nucleoside metabolic process|	purine nucleoside binding|protein binding|deacetylase activity|	39.0193	35.5618	37.9033	0.029307	0.038653	0.29105	0.76937	0.41552	0.23418	0.09342	Rank3
RRP15	ribosomal RNA processing 15 homolog (S. cerevisiae)	nucleus|nucleolus|mitochondrion|	None	None	3.95615	4.0098	3.55081	0.029306	0.0010236	0.5334	0.87643	0.41552	0.66609	0.75549	Rank3
ZNF503	zinc finger protein 503	nucleus|	transcription, DNA-templated|regulation of transcription, DNA-templated|negative regulation of cell proliferation|negative regulation of gene expression|neural precursor cell proliferation|G1 to G0 transition involved in cell differentiation|	nucleic acid binding|metal ion binding|	3.29304	3.62949	4.55968	0.036692	0.010138	0.13102	0.42351	0.61091	0.19827	0.14726	Rank3
PPP1R26	protein phosphatase 1, regulatory subunit 26	nucleus|	negative regulation of phosphatase activity|	protein phosphatase inhibitor activity|protein binding|phosphatase binding|	10.0395	11.7469	11.721	0.047151	0.011479	0.26988	0.20942	0.094201	0.75178	0.21915	Rank3
DDX19A	DEAD (Asp-Glu-Ala-Asp) box polypeptide 19A	nuclear pore|cytoplasm|membrane|nuclear membrane|	biological_process|metabolic process|response to zinc ion|protein transport|positive regulation of apoptotic process|mRNA transport|	molecular_function|RNA binding|helicase activity|ATP binding|	53.4488	53.9211	51.9021	0.046088	0.049585	0.43342	0.16969	0.12696	0.28113	0.18045	Rank3
KHDRBS1	KH domain containing, RNA binding, signal transduction associated 1	nucleus|cytoplasm|membrane|Grb2-Sos complex|	G2/M transition of mitotic cell cycle|transcription, DNA-templated|mRNA processing|cell cycle arrest|signal transduction|cell surface receptor signaling pathway|cell proliferation|positive regulation of signal transduction|positive regulation of signal transduction|negative regulation of transcription, DNA-templated|positive regulation of translational initiation|regulation of RNA export from nuc…	DNA binding|RNA binding|SH3/SH2 adaptor activity|protein binding|poly(A) binding|poly(U) RNA binding|SH3 domain binding|protein complex binding|poly(A) RNA binding|	108.901	121.957	136.453	0.02705	0.1505	0.02262	0.48156	0.23608	0.76789	0.32275	Rank3
CETN2	centrin, EF-hand protein, 2	intracellular|centrosome|centrosome|centriole|cytosol|photoreceptor connecting cilium|XPC complex|	G2/M transition of mitotic cell cycle|mitotic cell cycle|ATP catabolic process|nucleotide-excision repair|mitotic nuclear division|centriole replication|spermatogenesis|regulation of cytokinesis|	nucleic acid binding|calcium ion binding|protein binding|ATP binding|microtubule binding|ATP-dependent helicase activity|G-protein beta/gamma-subunit complex binding|heterotrimeric G-protein binding|	9.25382	10.8457	12.7823	0.023779	0.047389	0.10432	0.13686	0.48586	0.12767	0.12778	Rank3
RHPN2	rhophilin, Rho GTPase binding protein 2	nucleus|cytoplasm|intracellular membrane-bounded organelle|perinuclear region of cytoplasm|	signal transduction|	None	17.7085	20.5501	18.0362	0.04558	0.21761	0.17989	0.10918	0.88106	0.010714	0.19763	Rank3
TCFL5	transcription factor-like 5 (basic helix-loop-helix)	male germ cell nucleus|nucleus|	regulation of transcription, DNA-templated|transcription from RNA polymerase II promoter|multicellular organismal development|spermatogenesis|cell differentiation|regulation of cell proliferation|regulation of cell differentiation|	DNA binding|sequence-specific DNA binding transcription factor activity|protein dimerization activity|	2.67427	2.79779	2.70401	0.0052517	0.038652	0.32711	0.67038	0.63102	0.46427	0.1509	Rank3
COPS5	COP9 signalosome subunit 5	nucleus|cytoplasm|eukaryotic translation initiation factor 3 complex|synaptic vesicle|COP9 signalosome|cell junction|perinuclear region of cytoplasm|	protein deneddylation|transcription from RNA polymerase II promoter|translation|translational initiation|proteolysis|cullin deneddylation|protein deubiquitination|positive regulation of transcription from RNA polymerase II promoter|regulation of JNK cascade|regulation of cell cycle|exosomal secretion|	transcription coactivator activity|translation initiation factor activity|ubiquitin-specific protease activity|protein binding|metallopeptidase activity|metal ion binding|	74.3562	82.8652	68.8819	0.027707	0.0031097	0.087548	0.4539	0.42022	0.11767	0.064545	Rank3
ISY1-RAB43	ISY1-RAB43 readthrough	None	None	None	2.22866	2.789	2.64201	0.037083	0.011031	0.054372	0.28529	0.15072	0.56815	0.11033	Rank3
TTYH3	tweety family member 3	plasma membrane|plasma membrane|chloride channel complex|extracellular vesicular exosome|	chloride transport|ion transmembrane transport|transmembrane transport|chloride transmembrane transport|chloride transmembrane transport|chloride transmembrane transport|	intracellular calcium activated chloride channel activity|chloride channel activity|	5.78562	7.13886	7.78326	0.0054529	0.33608	0.013539	0.7145	0.52235	0.78219	0.30985	Rank3
GOLGA2	golgin A2	Golgi membrane|Golgi apparatus|cis-Golgi network|Golgi cisterna membrane|	mitotic cell cycle|	protein binding|	19.3801	21.2309	21.1682	0.046088	0.029416	0.11292	0.47597	0.4941	0.37759	0.10715	Rank3
POU2F1	POU class 2 homeobox 1	nucleus|nucleoplasm|cytoplasm|	transcription from RNA polymerase III promoter|gene expression|negative regulation of transcription, DNA-templated|	sequence-specific DNA binding transcription factor activity|protein binding|sequence-specific DNA binding|	5.9869	5.80391	5.25361	0.03145	0.057684	0.097274	0.22316	0.32627	0.12981	0.047386	Rank1
ZDHHC18	zinc finger, DHHC-type containing 18	Golgi apparatus|integral component of membrane|	protein palmitoylation|cellular protein localization|	zinc ion binding|palmitoyltransferase activity|protein-cysteine S-palmitoyltransferase activity|	2.86983	3.13795	3.35363	0.0098468	0.020135	0.33082	0.93587	0.42022	0.9774	0.8271	Rank3
PLA2G12A	phospholipase A2, group XIIA	extracellular region|extracellular region|endoplasmic reticulum|Golgi apparatus|	phospholipid metabolic process|phosphatidic acid biosynthetic process|biological_process|lipid catabolic process|phosphatidylglycerol acyl-chain remodeling|phosphatidylinositol acyl-chain remodeling|phosphatidylserine acyl-chain remodeling|phosphatidylcholine acyl-chain remodeling|phosphatidylethanolamine acyl-chain remodeling|small molecule metabolic process|glycerophospholipid biosynthetic proc…	calcium ion binding|calcium-dependent phospholipase A2 activity|	8.07722	7.84174	7.65515	0.00022093	0.090769	0.010187	0.57041	0.66728	0.39302	0.052325	Rank3
SUCLA2	succinate-CoA ligase, ADP-forming, beta subunit	mitochondrion|mitochondrial matrix|extracellular vesicular exosome|	tricarboxylic acid cycle|tricarboxylic acid cycle|succinyl-CoA metabolic process|succinate metabolic process|succinyl-CoA pathway|cellular metabolic process|small molecule metabolic process|	succinate-CoA ligase (ADP-forming) activity|protein binding|ATP binding|metal ion binding|	106.079	105.77	85.5889	0.02293	0.8363	0.002612	0.55377	0.4559	0.15025	0.32275	Rank3
RASA2	RAS p21 protein activator 2	cytoplasm|intrinsic component of the cytoplasmic side of the plasma membrane|perinuclear region of cytoplasm|	signal transduction|positive regulation of Ras GTPase activity|intracellular signal transduction|negative regulation of Ras protein signal transduction|	Ras GTPase activator activity|metal ion binding|	3.05857	2.53836	2.75581	0.0056454	0.38045	0.0087552	0.82553	0.62444	0.5052	0.12778	Rank3
ELFN2	extracellular leucine-rich repeat and fibronectin type III domain containing 2	extracellular space|integral component of membrane|	negative regulation of phosphatase activity|	protein phosphatase inhibitor activity|phosphatase binding|	5.06284	5.45396	5.17524	0.048837	0.66165	0.028022	0.97573	0.8497	0.9258	0.605	Rank3
AHCYL1	adenosylhomocysteinase-like 1	endoplasmic reticulum|extracellular vesicular exosome|	mRNA polyadenylation|protein export from nucleus|one-carbon metabolic process|biological_process|positive regulation of sodium ion transport|regulation of mRNA 3'-end processing|regulation of ion transmembrane transporter activity|regulation of anion transport|	adenosylhomocysteinase activity|protein binding|	45.6745	45.6789	43.4951	0.029306	0.27334	0.13624	0.073189	0.016002	0.82862	0.14726	Rank3
PWP1	PWP1 homolog (S. cerevisiae)	nucleus|nucleolus|Golgi apparatus|	transcription, DNA-templated|	None	48.4653	51.2569	56.4283	0.012272	0.5574	0.00013318	0.92058	0.42482	0.92672	0.82891	Rank3
SMARCB1	SWI/SNF related, matrix associated, actin dependent regulator of chromatin, subfamily b, member 1	nuclear chromatin|XY body|nucleus|nucleoplasm|nucleolus|SWI/SNF complex|protein complex|npBAF complex|nBAF complex|	blastocyst hatching|DNA repair|nucleosome disassembly|chromatin remodeling|transcription, DNA-templated|regulation of transcription from RNA polymerase II promoter|nervous system development|negative regulation of cell proliferation|DNA integration|cell differentiation|single stranded viral RNA replication via double stranded DNA intermediate|ATP-dependent chromatin remodeling|ATP-dependent chrom…	RNA polymerase II core promoter proximal region sequence-specific DNA binding|RNA polymerase II distal enhancer sequence-specific DNA binding|p53 binding|transcription coactivator activity|transcription coactivator activity|protein binding|Tat protein binding|nucleosomal DNA binding|	73.0162	73.2859	79.6283	0.030464	0.006022	0.95724	0.58703	0.44278	0.4915	0.30985	Rank3
MT2A	metallothionein 2A	nucleus|cytoplasm|cytosol|perinuclear region of cytoplasm|	cellular copper ion homeostasis|cytokine-mediated signaling pathway|cellular response to drug|cellular response to interleukin-3|cellular response to erythropoietin|negative regulation of growth|interferon-gamma-mediated signaling pathway|cellular response to zinc ion|	protein binding|drug binding|zinc ion binding|zinc ion binding|	659.463	654.181	704.14	0.016301	0.0085577	0.65766	0.75045	0.3924	0.9585	0.1245	Rank3
ELOF1	elongation factor 1 homolog (S. cerevisiae)	nucleus|	transcription, DNA-templated|regulation of transcription, DNA-templated|	metal ion binding|	39.1524	39.9617	45.2903	0.0023963	0.12505	0.019642	0.92948	0.44278	0.92961	0.27083	Rank3
ADD3	adducin 3 (gamma)	condensed nuclear chromosome|cytoskeleton|plasma membrane|cell-cell junction|cell cortex|membrane|	None	actin binding|structural constituent of cytoskeleton|calmodulin binding|	31.9927	35.4274	29.689	0.01365	0.40293	0.015435	0.84844	0.787	0.8502	0.24928	Rank3
ATXN2	ataxin 2	nucleus|cytoplasm|Golgi apparatus|trans-Golgi network|polysome|cytoplasmic stress granule|membrane|ribonucleoprotein complex|perinuclear region of cytoplasm|	negative regulation of receptor internalization|regulation of translation|cell death|RNA metabolic process|cerebellar Purkinje cell differentiation|cytoplasmic mRNA processing body assembly|stress granule assembly|negative regulation of multicellular organism growth|neuron projection morphogenesis|homeostasis of number of cells|RNA transport|neuromuscular process|	RNA binding|epidermal growth factor receptor binding|protein binding|protein C-terminus binding|poly(A) RNA binding|	40.2991	41.1407	37.4766	0.013967	0.00048881	0.86915	0.7145	0.59355	0.67718	0.42225	Rank3
COX10	cytochrome c oxidase assembly homolog 10 (yeast)	mitochondrion|mitochondrial inner membrane|integral component of membrane|	mitochondrial fission|mitochondrial electron transport, cytochrome c to oxygen|porphyrin-containing compound metabolic process|heme biosynthetic process|heme a biosynthetic process|respiratory chain complex IV assembly|aerobic respiration|small molecule metabolic process|cellular respiration|heme O biosynthetic process|hydrogen ion transmembrane transport|	cytochrome-c oxidase activity|farnesyltranstransferase activity|protoheme IX farnesyltransferase activity|	8.50377	8.6007	7.92038	0.0035392	0.15893	0.00048217	0.55942	0.7737	0.11932	0.075339	Rank3
VPS13B	vacuolar protein sorting 13 homolog B (yeast)	None	protein transport|	None	10.2516	11.5031	9.9665	0.03112	0.0025262	0.90763	0.11968	0.073249	0.97662	0.18475	Rank3
CCNA2	cyclin A2	female pronucleus|male pronucleus|nucleus|nucleoplasm|cytoplasm|	regulation of cyclin-dependent protein serine/threonine kinase activity|G2/M transition of mitotic cell cycle|mitotic cell cycle|mitotic nuclear division|mitotic G2 DNA damage checkpoint|Ras protein signal transduction|regulation of G2/M transition of mitotic cell cycle|organ regeneration|response to estradiol|response to glucagon|positive regulation of transcription, DNA-templated|positive regul…	protein binding|protein kinase binding|	20.5934	19.7703	20.4787	0.023779	0.036255	0.17989	0.56214	0.43379	0.13066	0.82527	Rank3
DAP	death-associated protein	None	autophagy|apoptotic process|activation of cysteine-type endopeptidase activity involved in apoptotic process|negative regulation of autophagy|negative regulation of NF-kappaB transcription factor activity|cellular response to amino acid starvation|negative regulation of transcription, DNA-templated|apoptotic signaling pathway|	death domain binding|	18.8181	22.4971	19.9558	0.036287	0.1905	0.048595	0.91847	0.80865	0.89379	0.75063	Rank3
ELF3	E74-like factor 3 (ets domain transcription factor, epithelial-specific )	nucleus|cytoplasm|	blastocyst development|regulation of transcription from RNA polymerase II promoter|transcription from RNA polymerase II promoter|inflammatory response|multicellular organismal development|epidermis development|extracellular matrix organization|epithelial cell differentiation|negative regulation of transcription, DNA-templated|positive regulation of transcription, DNA-templated|positive regulation…	sequence-specific DNA binding RNA polymerase II transcription factor activity|sequence-specific DNA binding transcription factor activity|transcription coactivator activity|protein binding|sequence-specific DNA binding|	29.796	26.239	28.2228	0.01365	0.011252	0.23423	0.40347	0.75966	0.19265	0.36576	Rank3
PDZD8	PDZ domain containing 8	membrane|	cytoskeleton organization|viral process|regulation of cell morphogenesis|intracellular signal transduction|	metal ion binding|	11.5649	11.6803	10.828	0.02705	0.43935	0.0095718	0.65091	0.89637	0.53116	0.10559	Rank3
MDM4	MDM4, p53 regulator	nucleus|	negative regulation of transcription from RNA polymerase II promoter|protein complex assembly|cell proliferation|positive regulation of cell proliferation|negative regulation of cell proliferation|DNA damage response, signal transduction by p53 class mediator|negative regulation of protein catabolic process|negative regulation of apoptotic process|G0 to G1 transition|protein stabilization|negativ…	protein binding|zinc ion binding|enzyme binding|	8.06908	8.83444	7.49036	0.0014757	0.026489	0.18631	0.92658	0.45589	0.92961	0.37885	Rank3
EVI5L	ecotropic viral integration site 5-like	None	positive regulation of Rab GTPase activity|	Rab GTPase activator activity|protein binding|	2.63149	2.88044	2.97811	0.035189	0.010619	0.90048	0.91741	0.69498	0.67718	0.77861	Rank3
CEP70	centrosomal protein 70kDa	nucleus|cytoplasm|centrosome|cytosol|nuclear membrane|	G2/M transition of mitotic cell cycle|mitotic cell cycle|	protein binding|	40.7733	42.8602	35.2342	0.048838	0.12505	0.47201	0.18335	0.53815	0.13687	0.048146	Rank1
GAK	cyclin G associated kinase	Golgi apparatus|focal adhesion|membrane|intracellular membrane-bounded organelle|perinuclear region of cytoplasm|	protein phosphorylation|cell cycle|	protein serine/threonine kinase activity|protein binding|ATP binding|	42.0695	48.811	58.5274	0.033198	0.12997	0.013381	0.28529	0.15072	0.84368	0.058228	Rank3
POP4	processing of precursor 4, ribonuclease P/MRP subunit (S. cerevisiae)	ribonuclease MRP complex|nucleolar ribonuclease P complex|	rRNA processing|mRNA cleavage|tRNA processing|RNA phosphodiester bond hydrolysis|RNA phosphodiester bond hydrolysis, endonucleolytic|RNA phosphodiester bond hydrolysis, endonucleolytic|	RNA binding|ribonuclease P activity|protein binding|	32.1929	34.3124	34.8737	0.0024605	0.023229	0.10235	0.54265	0.43379	0.39744	0.27951	Rank3
DNTTIP2	deoxynucleotidyltransferase, terminal, interacting protein 2	nucleus|nucleolus|	transcription, DNA-templated|regulation of transcription, DNA-templated|	poly(A) RNA binding|	54.9665	50.4684	46.4167	0.0019781	0.017892	0.052703	0.55377	0.46031	0.26969	0.050584	Rank3
RPL24	ribosomal protein L24	cytosol|membrane|cytosolic large ribosomal subunit|extracellular vesicular exosome|	nuclear-transcribed mRNA catabolic process, nonsense-mediated decay|translation|translation|translational initiation|translational elongation|translational termination|SRP-dependent cotranslational protein targeting to membrane|gene expression|viral process|RNA metabolic process|mRNA metabolic process|viral life cycle|viral transcription|cellular protein metabolic process|	RNA binding|structural constituent of ribosome|poly(A) RNA binding|	1614.18	1421.68	1275.51	0.00020399	0.00024248	0.15818	0.59262	0.41105	0.20245	0.23204	Rank3
SERGEF	secretion regulating guanine nucleotide exchange factor	nucleus|nucleolus|cytoplasm|intermediate filament cytoskeleton|	signal transduction|positive regulation of Ran GTPase activity|negative regulation of protein secretion|	Ran guanyl-nucleotide exchange factor activity|protein binding|	25.5405	30.9981	25.5469	0.039686	0.1408	0.22495	0.57041	0.57216	0.44644	0.015227	Rank1
MAPK14	mitogen-activated protein kinase 14	spindle pole|nucleus|nucleoplasm|cytoplasm|mitochondrion|cytosol|extracellular vesicular exosome|	DNA damage checkpoint|activation of MAPK activity|cell morphogenesis|cartilage condensation|angiogenesis|chondrocyte differentiation|toll-like receptor signaling pathway|MyD88-dependent toll-like receptor signaling pathway|MyD88-independent toll-like receptor signaling pathway|glucose metabolic process|transcription, DNA-templated|regulation of transcription from RNA polymerase II promoter|apopto…	protein serine/threonine kinase activity|MAP kinase activity|MAP kinase kinase activity|protein binding|ATP binding|NFAT protein binding|	27.1974	30.2299	31.9915	0.0088749	0.09953	0.02912	0.27136	0.43831	0.14474	0.05427	Rank3
ZDHHC23	zinc finger, DHHC-type containing 23	integral component of membrane|	protein palmitoylation|protein localization to plasma membrane|	zinc ion binding|protein-cysteine S-palmitoyltransferase activity|	4.14394	4.80301	5.26332	0.017911	0.2496	0.048595	0.81002	0.82312	0.30598	0.1245	Rank3
SEC13	SEC13 homolog (S. cerevisiae)	Golgi membrane|kinetochore|nuclear envelope|endoplasmic reticulum membrane|cytosol|ER to Golgi transport vesicle membrane|nuclear pore outer ring|nuclear pore outer ring|extracellular vesicular exosome|	mitotic cell cycle|antigen processing and presentation of peptide antigen via MHC class I|intracellular protein transport|ER to Golgi vesicle-mediated transport|protein N-linked glycosylation via asparagine|antigen processing and presentation of exogenous peptide antigen via MHC class II|post-translational protein modification|cellular protein metabolic process|COPII vesicle coating|mRNA transpor…	protein binding|	102.271	127.737	119.374	0.0068349	0.16331	0.0014265	0.16543	0.11286	0.76978	0.41786	Rank3
GNB5	guanine nucleotide binding protein (G protein), beta 5	nucleus|plasma membrane|	GTP catabolic process|signal transduction|phototransduction, visible light|rhodopsin mediated signaling pathway|regulation of rhodopsin mediated signaling pathway|negative regulation of voltage-gated calcium channel activity|	GTPase activity|signal transducer activity|protein binding|G-protein gamma-subunit binding|chaperone binding|	15.1082	18.0686	18.5586	0.039686	0.28276	0.027809	0.94086	0.40176	0.93678	0.44823	Rank3
INCENP	inner centromere protein antigens 135/155kDa	chromosome, centromeric region|kinetochore|condensed chromosome kinetochore|lateral element|central element|centromeric heterochromatin|spindle|cytosol|microtubule|chromocenter|midbody|protein complex|	mitotic cell cycle|cytokinesis|chromosome segregation|mitotic nuclear division|	protein binding|	24.1253	24.451	25.0287	0.039686	0.016844	0.43143	0.67316	0.45589	0.080734	0.1261	Rank3
CDC40	cell division cycle 40	nucleoplasm|spliceosomal complex|catalytic step 2 spliceosome|	mRNA splicing, via spliceosome|mRNA splicing, via spliceosome|transcription from RNA polymerase II promoter|termination of RNA polymerase II transcription|mRNA export from nucleus|RNA splicing|gene expression|mRNA 3'-end processing|	protein binding|poly(A) RNA binding|	21.9096	24.1301	21.049	0.02542	0.46736	0.00098307	0.56486	0.41105	0.37759	0.75309	Rank3
WDR19	WD repeat domain 19	cytoplasm|cytoskeleton|intraciliary transport particle A|nonmotile primary cilium|motile cilium|photoreceptor connecting cilium|	in utero embryonic development|embryonic limb morphogenesis|embryonic camera-type eye development|intraciliary retrograde transport|cilium assembly|ear morphogenesis|embryonic cranial skeleton morphogenesis|neurological system process|digestive system development|ciliary receptor clustering involved in smoothened signaling pathway|smoothened signaling pathway involved in dorsal/ventral neural tub…	None	2.66541	2.86237	3.11	0.024303	0.036254	0.11372	0.18473	0.11751	0.26737	0.10117	Rank3
MXD3	MAX dimerization protein 3	nucleus|	transcription, DNA-templated|negative regulation of transcription, DNA-templated|	DNA binding|protein dimerization activity|	8.86745	10.2995	11.8779	0.031809	0.77595	0.02912	0.79586	0.86097	0.32327	0.6477	Rank3
NDUFA1	NADH dehydrogenase (ubiquinone) 1 alpha subcomplex, 1, 7.5kDa	mitochondrion|mitochondrial inner membrane|mitochondrial respiratory chain complex I|mitochondrial respiratory chain complex I|integral component of membrane|mitochondrial membrane|	mitochondrial electron transport, NADH to ubiquinone|respiratory electron transport chain|cellular metabolic process|small molecule metabolic process|	NADH dehydrogenase (ubiquinone) activity|	88.7716	73.4018	95.5356	0.0083504	0.0032405	0.65274	0.70361	0.59355	0.79732	0.8846	Rank3
RBBP9	retinoblastoma binding protein 9	nucleus|nucleolus|cytoplasm|extracellular vesicular exosome|	metabolic process|regulation of cell proliferation|	hydrolase activity|	3.14473	3.27176	2.79968	0.019201	0.036255	0.23942	0.91198	0.4559	0.69114	0.052325	Rank3
PLS1	plastin 1	cytoplasm|extracellular vesicular exosome|	None	structural constituent of cytoskeleton|calcium ion binding|actin filament binding|	39.1071	36.2311	31.3176	0.044545	0.83976	0.021183	0.96969	0.54202	0.99183	0.92447	Rank3
NKIRAS2	NFKB inhibitor interacting Ras-like 2	cellular_component|cytoplasm|membrane|	GTP catabolic process|I-kappaB kinase/NF-kappaB signaling|small GTPase mediated signal transduction|	GTPase activity|GTP binding|	24.9525	28.9271	28.3773	0.043526	0.15475	0.052703	0.10096	0.20742	0.15623	0.00050934	Rank1
STX2	syntaxin 2	cell-cell junction|cell surface|integral component of membrane|basolateral plasma membrane|cytoplasmic vesicle|intracellular membrane-bounded organelle|membrane raft|extracellular vesicular exosome|	intracellular protein transport|signal transduction|acrosome reaction|ectoderm development|organ morphogenesis|regulation of gene expression|cell differentiation|regulation of blood coagulation|	SNAP receptor activity|protein binding|calcium-dependent protein binding|	5.66106	5.53711	5.80814	0.019645	0.85479	1.0008e-05	0.97021	0.51447	0.99283	0.88997	Rank3
BRK1	BRICK1, SCAR/WAVE actin-nucleating complex subunit	cytosol|cytoskeleton|lamellipodium|SCAR complex|extracellular vesicular exosome|	in utero embryonic development|positive regulation of cell proliferation|positive regulation of lamellipodium assembly|Rac protein signal transduction|actin cytoskeleton organization|Fc-gamma receptor signaling pathway involved in phagocytosis|innate immune response|cell motility|protein homotrimerization|positive regulation of Arp2/3 complex-mediated actin nucleation|	protein complex binding|Rac GTPase binding|	34.5251	38.736	32.221	0.027707	0.016143	0.51156	0.96023	0.51842	0.94807	0.8719	Rank3
SF3A3	splicing factor 3a, subunit 3, 60kDa	nucleus|nucleoplasm|spliceosomal complex|nuclear speck|catalytic step 2 spliceosome|	RNA splicing, via transesterification reactions|mRNA 3'-splice site recognition|mRNA splicing, via spliceosome|mRNA splicing, via spliceosome|mRNA processing|RNA splicing|gene expression|	protein binding|zinc ion binding|poly(A) RNA binding|	98.3516	91.04	94.6662	0.00036103	0.20108	0.0044632	0.22163	0.14127	0.88633	0.1261	Rank3
TM9SF3	transmembrane 9 superfamily member 3	integral component of membrane|	None	None	52.2038	54.2972	49.8289	0.0092726	0.20661	0.010596	0.82929	0.60919	0.71051	0.27512	Rank3
B4GALNT1	beta-1,4-N-acetyl-galactosaminyl transferase 1	plasma membrane|membrane|integral component of Golgi membrane|	ganglioside biosynthetic process|carbohydrate metabolic process|protein glycosylation|glycosphingolipid metabolic process|spermatogenesis|cell death|lipid storage|lipid glycosylation|	(N-acetylneuraminyl)-galactosylglucosylceramide N-acetylgalactosaminyltransferase activity|	5.96366	8.6272	7.50333	0.02378	0.68974	0.01229	0.21487	0.16015	0.19097	0.12778	Rank3
LENG8	leukocyte receptor cluster (LRC) member 8	None	None	protein binding|	6.23047	6.64408	6.15596	0.031119	0.00024248	0.32711	0.54816	0.37355	0.92961	0.29259	Rank3
HMBOX1	homeobox containing 1	nucleus|cytoplasm|	transcription, DNA-templated|negative regulation of transcription, DNA-templated|positive regulation of transcription, DNA-templated|	sequence-specific DNA binding transcription factor activity|protein binding|sequence-specific DNA binding|	2.35534	2.59256	2.47467	0.027407	0.029416	0.27312	0.376	0.42932	0.26184	0.48252	Rank3
AXIN2	axin 2	nucleus|cytoplasm|centrosome|cytoplasmic microtubule|plasma membrane|cell cortex|postsynaptic density|cytoplasmic membrane-bounded vesicle|beta-catenin destruction complex|	positive regulation of protein phosphorylation|intramembranous ossification|chondrocyte differentiation involved in endochondral bone morphogenesis|cell proliferation|negative regulation of cell proliferation|dorsal/ventral axis specification|positive regulation of epithelial to mesenchymal transition|positive regulation of cell death|bone mineralization|regulation of mismatch repair|cellular pro…	signal transducer activity|GTPase activator activity|protein binding|beta-catenin binding|beta-catenin binding|enzyme binding|protein kinase binding|ubiquitin protein ligase binding|armadillo repeat domain binding|I-SMAD binding|	3.42776	6.37311	7.29487	0.0054534	0.54623	0.0067013	0.6537	0.58477	0.67306	0.27951	Rank3
POLG	polymerase (DNA directed), gamma	mitochondrion|mitochondrial inner membrane|gamma DNA polymerase complex|mitochondrial nucleoid|extracellular vesicular exosome|	DNA metabolic process|DNA-dependent DNA replication|mitochondrial DNA replication|base-excision repair, gap-filling|aging|cell death|nucleic acid phosphodiester bond hydrolysis|	protease binding|DNA binding|chromatin binding|DNA-directed DNA polymerase activity|exonuclease activity|protein binding|	34.6788	39.7982	40.561	0.016301	0.55463	0.020942	0.54544	0.8886	0.46536	0.14726	Rank3
MRPS6	mitochondrial ribosomal protein S6	mitochondrion|small ribosomal subunit|	translation|	structural constituent of ribosome|rRNA binding|	32.9159	34.5516	39.3692	0.031449	0.023229	0.21382	0.97119	0.75966	0.95173	0.29259	Rank3
RNASEH2C	ribonuclease H2, subunit C	nucleus|ribonuclease H2 complex|	RNA catabolic process|	None	22.7636	24.1188	27.2016	0.036691	0.31143	0.16068	0.3266	0.50029	0.045355	0.11033	Rank3
PFDN5	prefoldin subunit 5	nucleus|cytoplasm|prefoldin complex|	regulation of transcription, DNA-templated|protein folding|cellular protein metabolic process|negative regulation of transcription, DNA-templated|'de novo' posttranslational protein folding|retina development in camera-type eye|negative regulation of canonical Wnt signaling pathway|	transcription corepressor activity|protein binding|unfolded protein binding|	340.788	389.908	396.608	0.014834	0.83976	9.4175e-05	0.61201	0.47742	0.31525	0.8501	Rank3
SVIP	small VCP/p97-interacting protein	Golgi membrane|Hrd1p ubiquitin ligase complex|endoplasmic reticulum membrane|plasma membrane|smooth endoplasmic reticulum membrane|extracellular vesicular exosome|	positive regulation of autophagy|negative regulation of protein complex assembly|positive regulation of protein lipidation|negative regulation of ER-associated ubiquitin-dependent protein catabolic process|	protein self-association|	8.32312	8.51564	6.56363	0.013328	0.62231	0.02912	0.72254	0.51842	0.4915	0.49098	Rank3
GPR89B	G protein-coupled receptor 89B	Golgi membrane|integral component of membrane|	ion transport|protein transport|regulation of ion transmembrane transport|	voltage-gated ion channel activity|	8.65121	8.97614	7.56259	0.0079563	0.011479	0.097274	0.92364	0.42482	0.93241	0.20622	Rank3
GPI	glucose-6-phosphate isomerase	extracellular space|nucleus|cytoplasm|cytosol|plasma membrane|membrane|neuron projection|extracellular vesicular exosome|	angiogenesis|carbohydrate metabolic process|glucose metabolic process|gluconeogenesis|glycolytic process|glycolytic process|humoral immune response|hemostasis|learning or memory|methylglyoxal biosynthetic process|negative regulation of cysteine-type endopeptidase activity involved in apoptotic process|negative regulation of neuron apoptotic process|small molecule metabolic process|aldehyde catabo…	glucose-6-phosphate isomerase activity|cytokine activity|growth factor activity|intramolecular transferase activity|monosaccharide binding|	402.634	423.051	432.878	0.0055586	0.2934	0.00010957	0.75045	0.80767	0.70904	0.1261	Rank3
SACM1L	SAC1 suppressor of actin mutations 1-like (yeast)	Golgi membrane|endoplasmic reticulum membrane|endoplasmic reticulum membrane|Golgi apparatus|integral component of endoplasmic reticulum membrane|alpha-amino-3-hydroxy-5-methyl-4-isoxazolepropionic acid selective glutamate receptor complex|	phospholipid metabolic process|phosphatidylinositol biosynthetic process|biological_process|small molecule metabolic process|phosphatidylinositol dephosphorylation|	phosphatidylinositol-3-phosphatase activity|protein binding|phosphatase activity|phosphatidylinositol bisphosphate phosphatase activity|phosphatidylinositol-4-phosphate phosphatase activity|	32.6358	39.7112	34.8112	0.0012565	0.0067446	0.35906	0.92851	0.47742	0.92961	0.82344	Rank3
SMG6	SMG6 nonsense mediated mRNA decay factor	chromosome, telomeric region|nucleus|telomerase holoenzyme complex|nucleolus|cytoplasm|cytosol|cytosol|exon-exon junction complex|	nuclear-transcribed mRNA catabolic process, nonsense-mediated decay|nuclear-transcribed mRNA catabolic process, nonsense-mediated decay|telomere maintenance|mRNA export from nucleus|gene expression|RNA metabolic process|mRNA metabolic process|regulation of dephosphorylation|RNA phosphodiester bond hydrolysis, endonucleolytic|RNA phosphodiester bond hydrolysis, endonucleolytic|RNA phosphodiester b…	endoribonuclease activity|endoribonuclease activity|endoribonuclease activity|protein binding|telomeric DNA binding|metal ion binding|	12.9219	12.4163	13.9563	0.035189	0.15331	0.00066641	0.60368	0.54581	0.30598	0.057214	Rank3
CCNB1IP1	cyclin B1 interacting protein 1, E3 ubiquitin protein ligase	synaptonemal complex|	blastocyst formation|reciprocal meiotic recombination|spermatid development|protein ubiquitination|chiasma assembly|	protein binding|zinc ion binding|ligase activity|	134.653	112.892	110.367	0.035189	0.017892	0.21072	0.52875	0.51645	0.48169	0.15888	Rank3
STEAP2	STEAP family member 2, metalloreductase	early endosome|cytosol|plasma membrane|endosome membrane|trans-Golgi network transport vesicle|integral component of Golgi membrane|intracellular membrane-bounded organelle|	ion transport|Golgi to plasma membrane transport|endocytosis|response to hormone|regulated secretory pathway|iron ion homeostasis|oxidation-reduction process|	transporter activity|oxidoreductase activity|metal ion binding|	9.68912	12.4885	8.94524	0.0054534	0.010822	0.097274	0.58984	0.4941	0.75178	0.058228	Rank3
NARF	nuclear prelamin A recognition factor	nucleus|lamin filament|nuclear lamina|nuclear lumen|	None	lamin binding|	105.878	118.002	115.299	0.0062376	0.2496	0.10052	0.07783	0.15072	0.14659	0.038161	Rank1
HPSE	heparanase	extracellular region|nucleus|lysosome|lysosomal membrane|lysosomal lumen|intracellular membrane-bounded organelle|membrane raft|	carbohydrate metabolic process|glycosaminoglycan catabolic process|proteoglycan metabolic process|cell-matrix adhesion|positive regulation vascular endothelial growth factor production|positive regulation of blood coagulation|heparan sulfate proteoglycan catabolic process|glycosaminoglycan metabolic process|positive regulation of osteoblast proliferation|small molecule metabolic process|regulatio…	beta-glucuronidase activity|protein binding|heparanase activity|heparanase activity|syndecan binding|protein dimerization activity|	7.992	8.39704	7.14991	0.04558	0.0031707	0.53496	0.56214	0.31683	0.95655	0.37448	Rank3
ABT1	activator of basal transcription 1	nucleus|transcription factor complex|nucleolus|	regulation of transcription from RNA polymerase II promoter|transcription from RNA polymerase II promoter|spinal cord motor neuron differentiation|	nucleotide binding|DNA binding|transcription coactivator activity|protein binding|poly(A) RNA binding|	6.99337	6.86088	6.51332	0.0055586	0.0015337	0.1422	0.41514	0.41105	0.11252	0.43963	Rank3
MRPL44	mitochondrial ribosomal protein L44	cellular_component|mitochondrion|ribosome|	RNA processing|mitochondrial translational elongation|RNA phosphodiester bond hydrolysis, endonucleolytic|	ribonuclease III activity|poly(A) RNA binding|	12.4424	13.059	13.514	0.039686	0.0074087	0.78867	0.65091	0.49829	0.43284	0.29684	Rank3
COQ2	coenzyme Q2 4-hydroxybenzoate polyprenyltransferase	mitochondrion|mitochondrial inner membrane|integral component of membrane|	glycerol metabolic process|ubiquinone biosynthetic process|ubiquinone biosynthetic process|ubiquinone biosynthetic process|cell death|isoprenoid biosynthetic process|small molecule metabolic process|	4-hydroxybenzoate decaprenyltransferase activity|4-hydroxybenzoate nonaprenyltransferase activity|	13.227	11.3526	11.9929	0.039686	0.48706	0.019422	0.80609	0.42482	0.81442	0.41786	Rank3
ALKBH1	alkB, alkylation repair homolog 1 (E. coli)	nuclear euchromatin|mitochondrion|	DNA catabolic process, endonucleolytic|DNA catabolic process, endonucleolytic|in utero embryonic development|neuron migration|placenta development|DNA repair|DNA dealkylation involved in DNA repair|neuron projection development|RNA repair|negative regulation of neuron apoptotic process|developmental growth|positive chemotaxis|oxidative demethylation|DNA demethylation|	DNA-(apurinic or apyrimidinic site) lyase activity|ferrous iron binding|chemoattractant activity|methylcytosine dioxygenase activity|	4.07661	3.88022	4.01344	0.031808	0.02708	0.37454	0.92564	0.77252	0.87492	0.80402	Rank3
KIF13B	kinesin family member 13B	cytoplasm|kinesin complex|microtubule|axon|	protein targeting|microtubule-based movement|signal transduction|metabolic process|metabolic process|T cell activation|regulation of axonogenesis|	microtubule motor activity|protein binding|ATP binding|microtubule binding|protein kinase binding|14-3-3 protein binding|	2.37751	3.03722	2.95763	0.047151	0.023229	0.65032	0.074012	0.084936	0.59524	0.058227	Rank3
SAR1B	secretion associated, Ras related GTPase 1B	endoplasmic reticulum membrane|cytosol|ER to Golgi transport vesicle membrane|Golgi cisterna membrane|	antigen processing and presentation of peptide antigen via MHC class I|GTP catabolic process|intracellular protein transport|ER to Golgi vesicle-mediated transport|protein N-linked glycosylation via asparagine|antigen processing and presentation of exogenous peptide antigen via MHC class II|post-translational protein modification|cellular protein metabolic process|small molecule metabolic process…	GTPase activity|GTP binding|metal ion binding|	37.5805	41.9672	43.4524	0.022929	0.0067441	0.82514	0.63982	0.787	0.70182	0.90617	Rank3
ZNF580	zinc finger protein 580	nucleus|	positive regulation of endothelial cell proliferation|positive regulation of leukocyte chemotaxis|transcription, DNA-templated|regulation of transcription, DNA-templated|chemotaxis|inflammatory response|positive regulation of endothelial cell migration|positive regulation of gene expression|positive regulation of interleukin-8 production|cellular response to hydrogen peroxide|	DNA binding|protein binding|metal ion binding|	4.75887	4.60801	5.12362	0.04558	0.036254	0.1422	0.91198	0.42932	0.92865	0.8215	Rank3
LRPPRC	leucine-rich pentatricopeptide repeat containing	condensed nuclear chromosome|nucleus|nuclear inner membrane|nuclear outer membrane|nucleoplasm|mitochondrion|mitochondrion|cytoskeleton|microtubule|membrane|ribonucleoprotein complex|mitochondrial nucleoid|perinuclear region of cytoplasm|	negative regulation of mitochondrial RNA catabolic process|transcription, DNA-templated|regulation of transcription, DNA-templated|mitochondrion transport along microtubule|mRNA transport|regulation of mitochondrial translation|	single-stranded DNA binding|RNA binding|protein binding|microtubule binding|poly(A) RNA binding|beta-tubulin binding|	1633.05	1547.11	1432.59	3.8233e-05	0.054621	0.001173	0.14099	0.084936	0.93678	0.3012	Rank3
RPA2	replication protein A2, 32kDa	chromosome, telomeric region|nucleus|nucleoplasm|DNA replication factor A complex|DNA replication factor A complex|PML body|PML body|site of double-strand break|	G1/S transition of mitotic cell cycle|mitotic cell cycle|nucleotide-excision repair, DNA damage removal|telomere maintenance via recombination|telomere maintenance|telomere maintenance|double-strand break repair via homologous recombination|double-strand break repair via homologous recombination|DNA recombinase assembly|DNA replication|DNA replication|DNA replication|DNA strand elongation involve…	damaged DNA binding|single-stranded DNA binding|single-stranded DNA binding|single-stranded DNA binding|protein binding|enzyme binding|protein phosphatase binding|ubiquitin protein ligase binding|protein N-terminus binding|	53.0986	56.3336	51.0751	0.010384	0.053885	0.1016	0.54265	0.42482	0.033988	0.06982	Rank3
DNAJA2	DnaJ (Hsp40) homolog, subfamily A, member 2	cytosol|membrane|extracellular vesicular exosome|	positive regulation of cell proliferation|response to heat|protein refolding|	protein binding|ATP binding|heat shock protein binding|metal ion binding|unfolded protein binding|chaperone binding|	42.7966	48.7409	42.5925	0.03145	0.28276	0.035812	0.76937	0.69498	0.7602	0.36576	Rank3
POLR2A	polymerase (RNA) II (DNA directed) polypeptide A, 220kDa	nucleus|nucleus|nucleoplasm|DNA-directed RNA polymerase II, core complex|	mRNA splicing, via spliceosome|transcription, RNA-templated|DNA repair|transcription-coupled nucleotide-excision repair|nucleotide-excision repair|regulation of transcription, DNA-templated|transcription from RNA polymerase II promoter|transcription from RNA polymerase II promoter|transcription from RNA polymerase II promoter|transcription initiation from RNA polymerase II promoter|transcription …	RNA polymerase II activity|DNA binding|DNA-directed RNA polymerase activity|RNA-directed RNA polymerase activity|protein binding|protein binding|ubiquitin protein ligase binding|poly(A) RNA binding|metal ion binding|	38.1975	41.8328	44.3878	0.022596	0.34359	0.0045325	0.60641	0.42932	0.60682	0.058228	Rank3
REV3L	REV3-like, polymerase (DNA directed), zeta, catalytic subunit	nucleus|chromosome|zeta DNA polymerase complex|	DNA-dependent DNA replication|translesion synthesis|	nucleotide binding|DNA binding|DNA-directed DNA polymerase activity|protein binding|metal ion binding|4 iron, 4 sulfur cluster binding|	4.36469	4.25902	3.54289	0.02705	0.039923	0.56085	0.29899	0.20742	0.37087	0.18045	Rank3
ARHGEF19	Rho guanine nucleotide exchange factor (GEF) 19	None	positive regulation of Rho GTPase activity|regulation of actin cytoskeleton organization|wound healing|	Rho guanyl-nucleotide exchange factor activity|GTPase activator activity|protein binding|	7.44793	7.55138	7.87151	0.01272	0.02815	0.27651	0.69529	0.81556	0.54888	0.61852	Rank3
NGLY1	N-glycanase 1	cytoplasm|	glycoprotein catabolic process|	peptide-N4-(N-acetyl-beta-glucosaminyl)asparagine amidase activity|protein binding|metal ion binding|	32.8519	35.1377	33.7263	0.00058221	0.0011667	0.10906	0.92466	0.43379	0.96096	0.82344	Rank3
GINS2	GINS complex subunit 2 (Psf2 homolog)	nucleoplasm|	mitotic cell cycle|DNA strand elongation involved in DNA replication|	protein binding|	13.2473	13.6066	12.7159	0.024304	0.15893	0.072046	0.15204	0.13179	0.25175	0.014373	Rank1
XAB2	XPA binding protein 2	nucleus|nucleoplasm|membrane|catalytic step 2 spliceosome|	mRNA splicing, via spliceosome|blastocyst development|DNA repair|transcription-coupled nucleotide-excision repair|transcription-coupled nucleotide-excision repair|nucleotide-excision repair|transcription, DNA-templated|	protein binding|	14.7071	15.8378	18.4222	0.031808	0.036254	0.25051	0.61201	0.42482	0.45647	0.10117	Rank3
PPP4C	protein phosphatase 4, catalytic subunit	nucleus|cytoplasm|microtubule organizing center|plasma membrane|protein phosphatase 4 complex|	regulation of double-strand break repair via homologous recombination|dephosphorylation|dephosphorylation|dephosphorylation|NIK/NF-kappaB signaling|	NF-kappaB-inducing kinase activity|protein serine/threonine phosphatase activity|protein serine/threonine phosphatase activity|protein binding|metal ion binding|	184.119	205.029	216.205	0.033199	0.09175	0.02912	0.92264	0.41105	0.92864	0.83077	Rank3
NUP160	nucleoporin 160kDa	kinetochore|nuclear envelope|nuclear pore|cytosol|nuclear pore outer ring|nuclear pore outer ring|	mitotic cell cycle|carbohydrate metabolic process|mRNA export from nucleus|mitotic nuclear envelope disassembly|hexose transport|regulation of glucose transport|protein transport|glucose transport|viral process|cytokine-mediated signaling pathway|small molecule metabolic process|transmembrane transport|	nucleocytoplasmic transporter activity|protein binding|	30.3149	30.8617	31.8309	0.017505	0.5574	0.00020965	0.091868	0.1979	0.19936	0.069819	Rank3
DLG5	discs, large homolog 5 (Drosophila)	cytoplasm|plasma membrane|cell-cell adherens junction|	signal transduction|negative regulation of cell proliferation|single organismal cell-cell adhesion|intracellular signal transduction|regulation of apoptotic process|	protein binding|beta-catenin binding|cytoskeletal protein binding|receptor signaling complex scaffold activity|	19.5692	21.3678	23.33	0.039686	0.039288	0.14382	0.63702	0.50228	0.53329	0.22773	Rank3
DPAGT1	dolichyl-phosphate (UDP-N-acetylglucosamine) N-acetylglucosaminephosphotransferase 1 (GlcNAc-1-P transferase)	endoplasmic reticulum membrane|endoplasmic reticulum membrane|membrane|integral component of membrane|integral component of endoplasmic reticulum membrane|integral component of endoplasmic reticulum membrane|intracellular membrane-bounded organelle|	UDP-N-acetylglucosamine metabolic process|protein N-linked glycosylation|dolichol-linked oligosaccharide biosynthetic process|protein N-linked glycosylation via asparagine|dolichol biosynthetic process|post-translational protein modification|cellular protein metabolic process|protein oligomerization|	UDP-N-acetylglucosamine-dolichyl-phosphate N-acetylglucosaminephosphotransferase activity|UDP-N-acetylglucosamine-dolichyl-phosphate N-acetylglucosaminephosphotransferase activity|phospho-N-acetylmuramoyl-pentapeptide-transferase activity|transferase activity, transferring glycosyl groups|	42.8755	40.1264	44.3895	0.018124	0.090769	0.019641	0.91198	0.41105	0.93678	0.057214	Rank3
PMM2	phosphomannomutase 2	cytosol|neuronal cell body|extracellular vesicular exosome|	protein glycosylation|dolichol-linked oligosaccharide biosynthetic process|GDP-mannose biosynthetic process|GDP-mannose biosynthetic process|protein N-linked glycosylation via asparagine|mannose biosynthetic process|post-translational protein modification|cellular protein metabolic process|	phosphomannomutase activity|	56.4567	52.3681	55.7459	0.026008	0.029416	0.19498	0.60368	0.4559	0.44977	0.09342	Rank3
CCT2	chaperonin containing TCP1, subunit 2 (beta)	zona pellucida receptor complex|cytosol|cytosol|chaperonin-containing T-complex|microtubule|cell body|extracellular vesicular exosome|	protein folding|protein folding|binding of sperm to zona pellucida|cellular protein metabolic process|'de novo' posttranslational protein folding|chaperone-mediated protein complex assembly|	protein binding|ATP binding|unfolded protein binding|	753.965	769.992	796.477	0.017912	0.021725	0.14513	0.90157	0.41105	0.9258	0.81772	Rank3
RPL30	ribosomal protein L30	nucleus|cytoplasm|cytosol|membrane|cytosolic large ribosomal subunit|cytosolic large ribosomal subunit|extracellular vesicular exosome|	nuclear-transcribed mRNA catabolic process, nonsense-mediated decay|translation|translation|translational initiation|translational elongation|translational termination|SRP-dependent cotranslational protein targeting to membrane|gene expression|viral process|RNA metabolic process|mRNA metabolic process|viral life cycle|viral transcription|cellular protein metabolic process|	RNA binding|structural constituent of ribosome|structural constituent of ribosome|protein binding|poly(A) RNA binding|	2056.2	1876.74	1725.85	0.02825	0.16481	0.053701	0.091868	0.41105	0.00033024	0.1245	Rank3
ERGIC3	ERGIC and golgi 3	endoplasmic reticulum membrane|Golgi apparatus|membrane|integral component of membrane|endoplasmic reticulum-Golgi intermediate compartment membrane|	vesicle-mediated transport|	None	279.946	312.575	302.181	0.019645	0.46459	0.018806	0.94413	0.60577	0.93855	0.86284	Rank3
GLS	glutaminase	mitochondrion|mitochondrion|mitochondrial matrix|cytosol|	suckling behavior|regulation of respiratory gaseous exchange by neurological system process|glutamate biosynthetic process|glutamate biosynthetic process|glutamine catabolic process|glutamine catabolic process|synaptic transmission|neurotransmitter secretion|cellular amino acid biosynthetic process|glutamate secretion|cellular nitrogen compound metabolic process|small molecule metabolic process|p…	glutaminase activity|glutaminase activity|protein binding|	28.3888	27.6504	27.5654	0.0192	0.026489	0.42145	0.61752	0.42482	0.77071	0.83436	Rank3
CENPH	centromere protein H	kinetochore|kinetochore|kinetochore|condensed chromosome kinetochore|nucleus|nucleoplasm|cytosol|	mitotic cell cycle|nucleosome assembly|centromere-specific nucleosome assembly|kinetochore assembly|kinetochore organization|	protein binding|kinetochore binding|	18.371	15.9836	15.5879	0.0192	0.010338	0.089032	0.92658	0.4559	0.92961	0.057214	Rank3
BANP	BTG3 associated nuclear protein	nucleus|	transcription, DNA-templated|regulation of transcription, DNA-templated|cell cycle|multicellular organismal development|chromatin modification|protein localization to nucleus|negative regulation of protein catabolic process|	p53 binding|DNA binding|protein binding|	12.1259	13.0515	15.2222	0.038776	0.01585	0.19785	0.90972	0.45589	0.76183	0.16751	Rank3
VDAC1	voltage-dependent anion channel 1	nucleus|mitochondrion|mitochondrial outer membrane|mitochondrial inner membrane|plasma membrane|membrane|mitochondrial nucleoid|pore complex|extracellular vesicular exosome|	behavioral fear response|anion transport|apoptotic process|neuron-neuron synaptic transmission|learning|viral process|epithelial cell differentiation|regulation of anion transport|transmembrane transport|	protein binding|voltage-gated anion channel activity|voltage-gated anion channel activity|porin activity|	219.148	209.834	234.49	0.000671	0.33841	0.0013957	0.76937	0.50839	0.64335	0.26216	Rank3
CCDC174	coiled-coil domain containing 174	nucleus|cytoplasm|	None	None	8.16125	7.37454	8.59668	0.039686	0.003452	0.72867	0.82552	0.48998	0.82387	0.68962	Rank3
EXTL2	exostosin-like glycosyltransferase 2	endoplasmic reticulum|integral component of membrane|intrinsic component of endoplasmic reticulum membrane|extracellular vesicular exosome|	N-acetylglucosamine metabolic process|heparan sulfate proteoglycan biosynthetic process|UDP-N-acetylgalactosamine metabolic process|	glucuronyl-galactosyl-proteoglycan 4-alpha-N-acetylglucosaminyltransferase activity|alpha-1,4-N-acetylgalactosaminyltransferase activity|metal ion binding|	9.6615	11.0479	8.26307	0.022929	0.064207	0.22604	0.39866	0.46031	0.007596	0.5466	Rank3
AP4S1	adaptor-related protein complex 4, sigma 1 subunit	Golgi apparatus|coated pit|	protein transport|	transporter activity|protein transporter activity|	4.04251	3.42033	4.09213	0.00036103	0.38045	3.6182e-05	0.16543	0.11751	0.93678	0.058228	Rank3
NUB1	negative regulator of ubiquitin-like proteins 1	nucleus|nucleolus|cytoplasm|	ubiquitin-dependent protein catabolic process|protein ubiquitination|positive regulation of proteasomal ubiquitin-dependent protein catabolic process|response to interferon-gamma|response to tumor necrosis factor|	protein binding|	52.5843	51.1463	49.7568	0.030464	0.09277	0.053686	0.29729	0.43379	0.13995	0.048146	Rank1
FAM50A	family with sequence similarity 50, member A	nucleus|nucleus|	spermatogenesis|	poly(A) RNA binding|	28.4982	32.1608	33.1736	0.0054534	0.59966	0.0010842	0.39376	0.42932	0.3647	0.10264	Rank3
POLR2H	polymerase (RNA) II (DNA directed) polypeptide H	nucleus|nucleoplasm|DNA-directed RNA polymerase II, core complex|DNA-directed RNA polymerase III complex|DNA-directed RNA polymerase I complex|cytosol|	mRNA splicing, via spliceosome|DNA repair|transcription-coupled nucleotide-excision repair|nucleotide-excision repair|transcription from RNA polymerase I promoter|transcription initiation from RNA polymerase I promoter|transcription elongation from RNA polymerase I promoter|termination of RNA polymerase I transcription|transcription from RNA polymerase II promoter|transcription from RNA polymeras…	RNA polymerase I activity|RNA polymerase II activity|RNA polymerase III activity|DNA binding|	110.534	104.252	123.241	0.016301	0.25299	0.025367	0.91847	0.44278	0.92865	0.18905	Rank3
NDUFA6	NADH dehydrogenase (ubiquinone) 1 alpha subcomplex, 6, 14kDa	mitochondrial inner membrane|mitochondrial respiratory chain complex I|mitochondrial respiratory chain complex I|mitochondrial membrane|	mitochondrial electron transport, NADH to ubiquinone|response to oxidative stress|respiratory electron transport chain|cellular metabolic process|small molecule metabolic process|	NADH dehydrogenase (ubiquinone) activity|	48.3672	44.7266	51.4908	0.044545	0.5067	0.018806	0.74551	0.48998	0.78884	0.44393	Rank3
RPS23	ribosomal protein S23	nucleolus|cytoplasm|cytosol|ribosome|membrane|cytosolic small ribosomal subunit|	nuclear-transcribed mRNA catabolic process, nonsense-mediated decay|translation|translation|translational initiation|translational elongation|translational termination|SRP-dependent cotranslational protein targeting to membrane|gene expression|viral process|RNA metabolic process|mRNA metabolic process|viral life cycle|viral transcription|cellular protein metabolic process|	structural constituent of ribosome|protein binding|poly(A) RNA binding|	2955.89	3048.58	2933.79	0.0034674	0.0004883	0.11879	0.90157	0.41105	0.43284	0.81581	Rank3
CTDP1	CTD (carboxy-terminal domain, RNA polymerase II, polypeptide A) phosphatase, subunit 1	spindle pole|nucleus|nucleoplasm|cytoplasm|centrosome|spindle|actin cytoskeleton|midbody|spindle midzone|	transcription from RNA polymerase II promoter|transcription elongation from RNA polymerase II promoter|protein dephosphorylation|exit from mitosis|gene expression|viral process|positive regulation of viral transcription|	DNA-directed RNA polymerase activity|CTD phosphatase activity|	8.91252	9.23506	11.1838	3.9772e-05	0.66165	1.9759e-05	0.29729	0.41552	0.10377	0.22773	Rank3
WDR82	WD repeat domain 82	chromatin|histone methyltransferase complex|Set1C/COMPASS complex|PTW/PP1 phosphatase complex|	histone H3-K4 methylation|	chromatin binding|protein binding|histone methyltransferase activity (H3-K4 specific)|	33.0665	34.7188	33.9676	0.0071675	0.0011662	0.20709	0.91634	0.41105	0.7602	0.82344	Rank3
TBP	TATA box binding protein	female pronucleus|male pronucleus|nucleoplasm|transcription factor TFIID complex|transcription factor TFIIA complex|nuclear euchromatin|cytoplasm|	transcription from RNA polymerase I promoter|transcription initiation from RNA polymerase I promoter|transcription elongation from RNA polymerase I promoter|termination of RNA polymerase I transcription|transcription from RNA polymerase II promoter|transcription from RNA polymerase II promoter|transcription from RNA polymerase II promoter|transcription initiation from RNA polymerase II promoter|t…	RNA polymerase II repressing transcription factor binding|protein binding|transcription factor binding|transcription regulatory region DNA binding|repressing transcription factor binding|	11.5187	12.6705	9.05705	0.030151	0.0093429	0.32291	0.13872	0.11751	0.34453	0.26216	Rank3
RPL35A	ribosomal protein L35a	cytosol|membrane|cytosolic large ribosomal subunit|extracellular vesicular exosome|	nuclear-transcribed mRNA catabolic process, nonsense-mediated decay|rRNA processing|translation|translation|translational initiation|translational elongation|translational termination|SRP-dependent cotranslational protein targeting to membrane|gene expression|viral process|RNA metabolic process|mRNA metabolic process|viral life cycle|viral transcription|ribosomal large subunit biogenesis|cellular…	tRNA binding|structural constituent of ribosome|poly(A) RNA binding|	1238.16	1205.65	1015.41	0.023171	0.00093786	0.38308	0.91198	0.41552	0.92961	0.41786	Rank3
ROMO1	reactive oxygen species modulator 1	mitochondrion|mitochondrial inner membrane|integral component of membrane|	replicative cell aging|positive regulation of cell proliferation|cellular response to reactive oxygen species|defense response to bacterium|positive regulation of reactive oxygen species metabolic process|	molecular_function|	94.1826	103.459	87.3927	0.014639	0.32419	0.021183	0.92658	0.45373	0.92768	0.18045	Rank3
ARF5	ADP-ribosylation factor 5	Golgi apparatus|plasma membrane|perinuclear region of cytoplasm|	GTP catabolic process|small GTPase mediated signal transduction|protein transport|vesicle-mediated transport|	GTPase activity|protein binding|GTP binding|	119.024	132.527	119.809	0.04558	0.2956	0.019532	0.70913	0.3924	0.86919	0.50332	Rank3
SNRNP27	small nuclear ribonucleoprotein 27kDa (U4/U6.U5)	cellular_component|nucleus|	mRNA processing|biological_process|RNA splicing|	nucleic acid binding|protein binding|	20.3496	18.6588	15.9712	0.0018272	0.00048881	0.11879	0.92658	0.43379	0.9258	0.75789	Rank3
CHORDC1	cysteine and histidine-rich domain (CHORD) containing 1	cellular_component|	response to stress|regulation of centrosome duplication|chaperone-mediated protein folding|regulation of cellular response to heat|negative regulation of Rho-dependent protein serine/threonine kinase activity|	protein binding|zinc ion binding|Hsp90 protein binding|	125.86	118.762	125.651	0.018758	0.014153	0.19734	0.92658	0.4559	0.92961	0.82344	Rank3
GTPBP4	GTP binding protein 4	nucleus|nucleolus|cytoplasm|Golgi apparatus|membrane|nuclear membrane|perinuclear region of cytoplasm|	regulation of cyclin-dependent protein serine/threonine kinase activity|osteoblast differentiation|GTP catabolic process|negative regulation of DNA replication|negative regulation of cell proliferation|negative regulation of cell-cell adhesion|negative regulation of cell migration|negative regulation of protein ubiquitination|negative regulation of collagen binding|ribosome biogenesis|protein sta…	GTPase activity|protein binding|GTP binding|poly(A) RNA binding|	43.3089	39.5477	46.8805	0.046645	0.0062206	0.27087	0.64805	0.42932	0.7203	0.81581	Rank3
FASTKD2	FAST kinase domains 2	mitochondrion|	protein phosphorylation|cellular respiration|	protein kinase activity|poly(A) RNA binding|	21.1667	20.6979	18.4349	0.001643	0.79133	0.0054352	0.44279	0.26949	0.92768	0.1546	Rank3
[truncated: 532 more rows]

## Sheet: ORF1p_negative_regulator
Gene	gene-info	gene-location	gene-process	gene-function	Ref(TPM)	Wild(TPM)	Mutant(TPM)	WAB1_WAB5	WA1_WA5	WB1_WB5	MAB1_MAB5	MA1_MA5	MB1_MB5	WMAB1_WMAB5	Rank
[truncated: 987 more rows]

[truncated: 2 more sheets: ORF2p_negative_regulator, ORF2p_lethality_regulator]
