# Supplementary material for: Identification of Novel Regulators of LINE-1 Expression via CRISPR/Cas9 Screening
Source: Research Square preprint supplement (doi:10.21203/rs.3.rs-6726282/v1), 2025-06-04
Supplement: Supplementary file 2 [file 073716e4e53b6ded169d565c.xlsx]

## Sheet: ORF1p positive regulators
Gene	Type of Gene	Synonyms	Function	Gene Summary	Gene Location	Subcellular Location (Protein Atlas)
SOCS4	protein-coding	SOCS7	suppressor of cytokine signaling 4	The protein encoded by this gene contains a SH2 domain and a SOCS BOX domain. The protein thus belongs to the suppressor of cytokine signaling (SOCS), also known as STAT-induced STAT inhibitor (SSI), protein family. SOCS family members are known to be cytokine-inducible negative regulators of cytokine signaling. Two alternatively spliced transcript variants encoding the same protein have been fou…	chr14:55027131-55049489	Cytosol;Nucleoplasm (reliability'])
TAF8	protein-coding	II|TAF|TAFII-43|TAFII43|TBN	TATA-box binding protein associated factor 8	This gene encodes one of several TATA-binding protein (TBP)-associated factors (TAFs), which are integral subunits of the general transcription factor complex TFIID. TFIID recognizes the core promoter of many genes and nucleates the assembly of a transcription preinitiation complex containing RNA polymerase II and other initiation factors. The protein encoded by this gene contains an H4-like hist…	chr6:42050522-42083278	Nucleoplasm (reliability'])
SEC14L2	protein-coding	C22orf6|SPF|TAP|TAP1	SEC14 like lipid binding 2	This gene encodes a cytosolic protein which belongs to a family of lipid-binding proteins including Sec14p, alpha-tocopherol transfer protein, and cellular retinol-binding protein. The encoded protein stimulates squalene monooxygenase which is a downstream enzyme in the cholesterol biosynthetic pathway. Alternatively spliced transcript variants encoding different isoforms have been identified for…	chr22:30397018-30425303	Nucleoplasm (reliability']); Additional: Cytosol
ILF2	protein-coding	NF45|PRO3063	interleukin enhancer binding factor 2	The protein encoded by this gene is a transcription factor required for T-cell expression of the interleukin 2 gene. It also binds RNA and is an essential component for encapsidation and protein priming of hepatitis B viral polymerase. The encoded 45 kDa protein (NF45, ILF2) forms a complex with the 90 kDa interleukin enhancer-binding factor 3 (NF90, ILF3), and this complex has been shown to affe…	chr1:153670993-153661788	Nucleoplasm (reliability'])
TMEM43	-0.16636	protein-coding	ARVC5|ARVD5|EDMD7|LUMA	transmembrane protein 43	This gene belongs to the TMEM43 family. Defects in this gene are the cause of familial arrhythmogenic right ventricular dysplasia type 5 (ARVD5), also known as arrhythmogenic right ventricular cardiomyopathy type 5 (ARVC5). Arrhythmogenic right ventricular dysplasia is an inherited disorder, often involving both ventricles, and is characterized by ventricular tachycardia, heart failure, sudden ca…	chr3:14125006-14143680
RBM38	protein-coding	HSRNASEB|RNPC1|SEB4B|SEB4D|dJ800J21.2	RNA binding motif protein 38		chr20:57391396-57409333	Cytosol;Nucleoplasm (reliability'])
RBMX2	protein-coding	CGI-79|Snu17	RNA binding motif protein X-linked 2		chrX:130401987-130413656	Nuclear membrane (reliability']); Additional: Nucleoli
PAK1IP1	protein-coding	MAK11|PIP1|WDR84|bA421M1.5|hPIP1	PAK1 interacting protein 1		chr6:10690865-10709782	Nucleoli (reliability'])
MRPS31	protein-coding	IMOGN38|MRP-S31|S31mt	mitochondrial ribosomal protein S31	Mammalian mitochondrial ribosomal proteins are encoded by nuclear genes and help in protein synthesis within the mitochondrion. Mitochondrial ribosomes (mitoribosomes) consist of a small 28S subunit and a large 39S subunit. They have an estimated 75% protein to rRNA composition compared to prokaryotic ribosomes, where this ratio is reversed. Another difference between mammalian mitoribosomes and …	chr13:40771207-40729128	Mitochondria (reliability']); Additional: Nucleoli
COBL	protein-coding		cordon-bleu WH2 repeat protein	This gene encodes a protein that contains WH2 domains (WASP, Wiskott-Aldrich syndrome protein, homology domain-2) that interact with actin. The encoded actin regulator protein is required for growth and assembly of brush border microvilli that play a role in maintaining intestinal homeostasis. A similar protein in mouse functions in midbrain neural tube closure. A pseudogene of this gene is locat…	chr7:51316809-51016212	Cell Junctions;Plasma membrane (reliability'])
MLF2	protein-coding	NTN4	myeloid leukemia factor 2		chr12:6753141-6747996	Nucleoplasm (reliability']); Additional: Cytosol;Plasma membrane
TCF3	protein-coding	AGM8|E2A|E47|ITF1|TCF-3|VDIR|bHLHb21|p75	transcription factor 3	This gene encodes a member of the E protein (class I) family of helix-loop-helix transcription factors. E proteins activate transcription by binding to regulatory E-box sequences on target genes as heterodimers or homodimers, and are inhibited by heterodimerization with inhibitor of DNA-binding (class IV) helix-loop-helix proteins. E proteins play a critical role in lymphopoiesis, and the encoded…	chr19:1652615-1609292	Nucleoplasm (reliability'])
FAR1	protein-coding	MLSTD2|PFCRD|SDR10E1	fatty acyl-CoA reductase 1	The protein encoded by this gene is required for the reduction of fatty acids to fatty alcohols, a process that is required for the synthesis of monoesters and ether lipids. NADPH is required as a cofactor in this reaction, and 16-18 carbon saturated and unsaturated fatty acids are the preferred substrate. This is a peroxisomal membrane protein, and studies suggest that the N-terminus contains a …	chr11:13668666-13732346	Peroxisomes (reliability'])

## Sheet: ORF1p negative regulators
Gene	Type of Gene	Synonyms	Function	Gene Summary	Gene Location	Subcellular Location (Protein Atlas)
UROD	protein-coding	PCT|UPD	uroporphyrinogen decarboxylase	This gene encodes an enzyme in the heme biosynthetic pathway. This enzyme is responsible for catalyzing the conversion of uroporphyrinogen to coproporphyrinogen through the removal of four carboxymethyl side chains. Mutations and deficiency in this enzyme are known to cause familial porphyria cutanea tarda and hepatoerythropoetic porphyria.[provided by RefSeq, Aug 2010]	chr1:45012254-45015575	Cytosol;Nucleoplasm (reliability'])
LLGL2	protein-coding	HGL|Hugl-2|LGL2	LLGL scribble cell polarity complex component 2	The lethal (2) giant larvae protein of Drosophila plays a role in asymmetric cell division, epithelial cell polarity, and cell migration. This human gene encodes a protein similar to lethal (2) giant larvae of Drosophila. In fly, the protein's ability to localize cell fate determinants is regulated by the atypical protein kinase C (aPKC). In human, this protein interacts with aPKC-containing comp…	chr17:75525080-75575209	Cytosol (reliability']); Additional: Vesicles
MAPK14	protein-coding	CSBP|CSBP1|CSBP2|CSPB1|EXIP|Mxi2|PRKM14|PRKM15|RK|SAPK2A|p38|p38ALPHA	mitogen-activated protein kinase 14	The protein encoded by this gene is a member of the MAP kinase family. MAP kinases act as an integration point for multiple biochemical signals, and are involved in a wide variety of cellular processes such as proliferation, differentiation, transcription regulation and development. This kinase is activated by various environmental stresses and proinflammatory cytokines. The activation requires i…	chr6:36027711-36122964	Nuclear speckles (reliability']); Additional: Cytosol
PSMC3	protein-coding	TBP1	proteasome 26S subunit, ATPase 3	The 26S proteasome is a multicatalytic proteinase complex with a highly ordered structure composed of 2 complexes, a 20S core and a 19S regulator. The 20S core is composed of 4 rings of 28 non-identical subunits; 2 rings are composed of 7 alpha subunits and 2 rings are composed of 7 beta subunits. The 19S regulator is composed of a base, which contains 6 ATPase subunits and 2 non-ATPase subunits,…	chr11:47426473-47418775	Cytosol;Nucleoplasm (reliability'])
CDC42EP1	protein-coding	BORG5|CEP1|MSE55	CDC42 effector protein 1	CDC42 is a member of the Rho GTPase family that regulates multiple cellular activities, including actin polymerization. The protein encoded by this gene is a CDC42 binding protein that mediates actin cytoskeleton reorganization at the plasma membrane. This protein is secreted and is primarily found in bone marrow. [provided by RefSeq, Jul 2008]	chr22:37560480-37569405	Actin filaments;Plasma membrane (reliability'])
AP5Z1	protein-coding	KIAA0415|SPG48|zeta	adaptor related protein complex 5 subunit zeta 1	This gene was identified by genome-wide screen for genes involved in homologous recombination DNA double-strand break repair (HR-DSBR). The encoded protein was found in a complex with other proteins that have a role in HR-DSBR. Knockdown of this gene reduced homologous recombination, and mutations in this gene were found in patients with spastic paraplegia. It was concluded that this gene likely …	chr7:4775623-4794397	Nuclear speckles (reliability']); Additional: Nucleoplasm
PIGO	protein-coding	HPMRS2	phosphatidylinositol glycan anchor biosynthesis class O	This gene encodes a protein that is involved in glycosylphosphatidylinositol (GPI)-anchor biosynthesis. The GPI-anchor is a glycolipid which contains three mannose molecules in its core backbone. The GPI-anchor is found on many blood cells and serves to anchor proteins to the cell surface. This protein is involved in the transfer of ethanolaminephosphate (EtNP) to the third mannose in GPI. At lea…	chr9:35096591-35085496	Nucleoli (reliability']); Additional: Nucleoplasm
CPSF6	protein-coding	CFIM|CFIM68|CFIM72|HPBRII-4|HPBRII-7	cleavage and polyadenylation specific factor 6	The protein encoded by this gene is one subunit of a cleavage factor required for 3' RNA cleavage and polyadenylation processing. The interaction of the protein with the RNA is one of the earliest steps in the assembly of the 3' end processing complex and facilitates the recruitment of other processing factors. The cleavage factor complex is composed of four polypeptides. This gene encodes the 68…	chr12:69239568-69274358	Nuclear speckles;Nucleoplasm (reliability'])
DDX31	protein-coding	PPP1R25	DEAD-box helicase 31	DEAD box proteins, characterized by the conserved motif Asp-Glu-Ala-Asp (DEAD), are putative RNA helicases. They are implicated in a number of cellular processes involving alteration of RNA secondary structure such as translation initiation, nuclear and mitochondrial splicing, and ribosome and spliceosome assembly. Based on their distribution patterns, some members of this DEAD box protein family…	chr9:132670401-132592997	Nucleoli (reliability']); Additional: Golgi apparatus;Vesicles
RBM34	protein-coding		RNA binding motif protein 34	This gene encodes a member of the RNA-binding motif family of RNA recognition motif proteins. The encoded protein contains an RNA-binding domain made up of two RNA recognition motif subdomains referred to as RNA recognition motif-1 and RNA recognition motif-2. Alternative splicing results in multiple transcript variants. [provided by RefSeq, Oct 2016]	chr1:235161280-235131183	Nucleoli (reliability']); Additional: Nucleoplasm
SSBP4	-0.288	protein-coding		single stranded DNA binding protein 4		chr19:18418719-18434562
AXIN2	protein-coding	AXIL|ODCRCS	axin 2	The Axin-related protein, Axin2, presumably plays an important role in the regulation of the stability of beta-catenin in the Wnt signaling pathway, like its rodent homologs, mouse conductin/rat axil. In mouse, conductin organizes a multiprotein complex of APC (adenomatous polyposis of the colon), beta-catenin, glycogen synthase kinase 3-beta, and conductin, which leads to the degradation of beta…	chr17:65561648-65528563	Nucleoplasm;Plasma membrane (reliability']); Additional: Cytosol
RPL36AL	protein-coding	RPL36A	ribosomal protein L36a like	Cytoplasmic ribosomes, organelles that catalyze protein synthesis, consist of a small 40S subunit and a large 60S subunit. Together these subunits are composed of 4 RNA species and approximately 80 structurally distinct proteins. This gene encodes a ribosomal protein that is a component of the 60S subunit. The protein, which shares sequence similarity with yeast ribosomal protein L44, belongs to …	chr14:49620626-49618530	Cytosol;Endoplasmic reticulum (reliability']); Additional: Plasma membrane
SNRPA	protein-coding	Mud1|U1-A|U1A	small nuclear ribonucleoprotein polypeptide A	The protein encoded by this gene associates with stem loop II of the U1 small nuclear ribonucleoprotein, which binds the 5' splice site of precursor mRNAs and is required for splicing. The encoded protein autoregulates itself by polyadenylation inhibition of its own pre-mRNA via dimerization and has been implicated in the coupling of splicing and polyadenylation. [provided by RefSeq, Oct 2010]	chr19:40751203-40765389	Nucleoplasm (reliability'])
TAF11	protein-coding	MGC:15243|PRO2134|TAF2I|TAFII28	TATA-box binding protein associated factor 11	Initiation of transcription by RNA polymerase II requires the activities of more than 70 polypeptides. The protein that coordinates these activities is transcription factor IID (TFIID), which binds to the core promoter to position the polymerase properly, serves as the scaffold for assembly of the remainder of the transcription complex, and acts as a channel for regulatory signals. TFIID is compo…	chr6:34888071-34877462	Nucleoplasm (reliability']); Additional: Golgi apparatus
RBM15	protein-coding	OTT|OTT1|SPEN	RNA binding motif protein 15	Members of the SPEN (Split-end) family of proteins, including RBM15, have repressor function in several signaling pathways and may bind to RNA through interaction with spliceosome components (Hiriart et al., 2005 [PubMed 16129689]).[supplied by OMIM, Feb 2009]	chr1:110339377-110346677	Nucleoplasm (reliability'])
TTI2	protein-coding	C8orf41|MRT39	TELO2 interacting protein 2	This gene encodes a regulator of the DNA damage response. The protein is a component of the Triple T complex (TTT) which also includes telomere length regulation protein and TELO2 interacting protein 1. The TTT complex is involved in cellular resistance to DNA damage stresses and may act as a regulator of phosphoinositide-3-kinase-related protein kinase (PIKK) abundance. [provided by RefSeq, May …	chr8:33513135-33498722	Centrosome (reliability'])
SFSWAP	protein-coding	SFRS8|SWAP	splicing factor SWAP	This gene encodes a human homolog of Drosophila splicing regulatory protein. This gene autoregulates its expression by control of splicing of its first two introns. In addition, it also regulates the splicing of fibronectin and CD45 genes. Two transcript variants encoding different isoforms have been identified. [provided by RefSeq, May 2012]	chr12:131711088-131799738	Nucleoplasm (reliability']); Additional: Cytosol;Plasma membrane
FAN1	protein-coding	KIAA1018|KMIN|MTMR15|hFAN1	FANCD2 and FANCI associated nuclease 1	This gene plays a role in DNA interstrand cross-link repair and encodes a protein with 5' flap endonuclease and 5'-3' exonuclease activity. Mutations in this gene cause karyomegalic interstitial nephritis. Alternatively spliced transcript variants encoding distinct isoforms have been described. [provided by RefSeq, Feb 2016]	chr15:30903852-30943108	Nucleoplasm (reliability']); Additional: Cytokinetic bridge;Cytosol
ZBTB11	protein-coding	MRT69|ZNF-U69274|ZNF913	zinc finger and BTB domain containing 11		chr3:101677132-101648889	Nucleoplasm (reliability'])
ZCCHC9	protein-coding	PPP1R41	zinc finger CCHC-type containing 9		chr5:81301587-81313297	Nucleoli;Nucleoplasm (reliability'])
MRPS18C	1.0032	protein-coding	CGI-134|MRP-S18-1|MRP-S18-c|MRPS18-1|S18mt-c|mrps18-c	mitochondrial ribosomal protein S18C	Mammalian mitochondrial ribosomal proteins are encoded by nuclear genes and help in protein synthesis within the mitochondrion. Mitochondrial ribosomes (mitoribosomes) consist of a small 28S subunit and a large 39S subunit. They have an estimated 75% protein to rRNA composition compared to prokaryotic ribosomes, where this ratio is reversed. Another difference between mammalian mitoribosomes and …	chr4:83456058-83462298
CBX5	protein-coding	HEL25|HP1|HP1A	chromobox 5	This gene encodes a highly conserved nonhistone protein, which is a member of the heterochromatin protein family. The protein is enriched in the heterochromatin and associated with centromeres. The protein has a single N-terminal chromodomain which can bind to histone proteins via methylated lysine residues, and a C-terminal chromo shadow-domain (CSD) which is responsible for the homodimerization…	chr12:54280122-54230942	Nucleoplasm (reliability'])
TAF2	-0.71197	protein-coding	CIF150|MRT40|TAF2B|TAFII150	TATA-box binding protein associated factor 2	Initiation of transcription by RNA polymerase II requires the activities of more than 70 polypeptides. The protein that coordinates these activities is transcription factor IID (TFIID), which binds to the core promoter to position the polymerase properly, serves as the scaffold for assembly of the remainder of the transcription complex, and acts as a channel for regulatory signals. TFIID is compo…	chr8:119832858-119730773
UFM1	0.16515	protein-coding	BM-002|C13orf20|HLD14	ubiquitin fold modifier 1	UFM1 is a ubiquitin-like protein that is conjugated to target proteins by E1-like activating enzyme UBA5 (UBE1DC1; MIM 610552) and E2-like conjugating enzyme UFC1 (MIM 610554) in a manner analogous to ubiquitylation (see UBE2M; MIM 603173) (Komatsu et al., 2004 [PubMed 15071506]).[supplied by OMIM, Dec 2008]	chr13:38349851-38363619
TMEM69	protein-coding	C1orf154	transmembrane protein 69		chr1:45688181-45694438	Nucleoplasm (reliability'])
DAP	protein-coding		death associated protein	This gene encodes a basic, proline-rich, 15-kD protein. The protein acts as a positive mediator of programmed cell death that is induced by interferon-gamma. Alternatively spliced transcript variants encoding distinct isoforms have been found for this gene. [provided by RefSeq, May 2014]	chr5:10761234-10679230	Mitochondria;Vesicles (reliability']); Additional: Nucleoplasm
SLC46A1	protein-coding	G21|HCP1|PCFT	solute carrier family 46 member 1	This gene encodes a transmembrane proton-coupled folate transporter protein that facilitates the movement of folate and antifolate substrates across cell membranes, optimally in acidic pH environments. This protein is also expressed in the brain and choroid plexus where it transports folates into the central nervous system. This protein further functions as a heme transporter in duodenal enterocy…	chr17:28406630-28394642	Cytosol;Plasma membrane (reliability'])
PAXIP1	protein-coding	CAGF28|CAGF29|PACIP1|PAXIP1L|PTIP|TNRC2	PAX interacting protein 1	This gene is a member of the paired box (PAX) gene family and encodes a nuclear protein with six BRCT (breast cancer carboxy-terminal) domains. This protein plays a critical role in maintaining genome stability, condensation of chromatin and progression through mitosis. [provided by RefSeq, Jul 2008]	chr7:155003419-154943690	Nucleoplasm;Vesicles (reliability'])
DNAJC11	protein-coding	dJ126A5.1	DnaJ heat shock protein family (Hsp40) member C11		chr1:6701833-6634168	Cytosol (reliability'])
MLLT10	protein-coding	AF10	MLLT10 histone lysine methyltransferase DOT1L cofactor	This gene encodes a transcription factor and has been identified as a partner gene involved in several chromosomal rearrangements resulting in various leukemias. Multiple transcript variants encoding different isoforms have been found for this gene. [provided by RefSeq, Sep 2010]	chr10:21524616-21743630	Nucleoplasm (reliability'])
PRRC2A	protein-coding	BAT2|D6S51|D6S51E|G2	proline rich coiled-coil 2A	A cluster of genes, BAT1-BAT5, has been localized in the vicinity of the genes for TNF alpha and TNF beta. These genes are all within the human major histocompatibility complex class III region. This gene has microsatellite repeats which are associated with the age-at-onset of insulin-dependent diabetes mellitus (IDDM) and possibly thought to be involved with the inflammatory process of pancreati…	chr6:31620715-31637780	Cytosol (reliability']); Additional: Nucleoplasm;Plasma membrane
SEC23B	protein-coding	CDA-II|CDAII|CDAN2|CWS7|HEMPAS|hSec23B	SEC23 homolog B, COPII coat complex component	The protein encoded by this gene is a member of the SEC23 subfamily of the SEC23/SEC24 family, which is involved in vesicle trafficking. The encoded protein has similarity to yeast Sec23p component of COPII. COPII is the coat protein complex responsible for vesicle budding from the ER. The function of this gene product has been implicated in cargo selection and concentration. Multiple alternative…	chr20:18507548-18561415	Vesicles (reliability'])
GPATCH4	protein-coding	GPATC4	G-patch domain containing 4		chr1:156601479-156594301	Nucleoli;Nucleoplasm (reliability'])
OGDH	protein-coding	AKGDH|E1k|KGD1|OGDC|OGDH2	oxoglutarate dehydrogenase	This gene encodes one subunit of the 2-oxoglutarate dehydrogenase complex. This complex catalyzes the overall conversion of 2-oxoglutarate (alpha-ketoglutarate) to succinyl-CoA and CO(2) during the Krebs cycle. The protein is located in the mitochondrial matrix and uses thiamine pyrophosphate as a cofactor. A congenital deficiency in 2-oxoglutarate dehydrogenase activity is believed to lead to hy…	chr7:44606572-44709066	Mitochondria (reliability'])
COG8	-0.067774	protein-coding	CDG2H|DOR1	component of oligomeric golgi complex 8	This gene encodes a protein that is a component of the conserved oligomeric Golgi (COG) complex, a multiprotein complex that plays a structural role in the Golgi apparatus, and is involved in intracellular membrane trafficking and glycoprotein modification. Mutations in this gene cause congenital disorder of glycosylation, type IIh, a disease that is characterized by under-glycosylated serum prot…	chr16:69339564-69326428
FBXW11	protein-coding	BTRC2|BTRCP2|FBW1B|FBXW1B|Fbw11|Hos|NEDJED	F-box and WD repeat domain containing 11	This gene encodes a member of the F-box protein family which is characterized by an approximately 40 amino acid motif, the F-box. The F-box proteins constitute one of the four subunits of ubiquitin protein ligase complex called SCFs (SKP1-cullin-F-box), which function in phosphorylation-dependent ubiquitination. The F-box proteins are divided into 3 classes: Fbws containing WD-40 domains, Fbls co…	chr5:172006638-171861549	Nucleoli (reliability']); Additional: Vesicles
SAFB	protein-coding	HAP|HET|SAB-B1|SAF-B|SAF-B1|SAFB1	scaffold attachment factor B	This gene encodes a DNA-binding protein which has high specificity for scaffold or matrix attachment region DNA elements (S/MAR DNA). This protein is thought to be involved in attaching the base of chromatin loops to the nuclear matrix but there is conflicting evidence as to whether this protein is a component of chromatin or a nuclear matrix protein. Scaffold attachment factors are a specific su…	chr19:5623081-5668478	Nucleoplasm (reliability'])
LDB1	LDB1	4.529e-07	2.331e-06	0.00099	42	2.2712
DRAP1	protein-coding	NC2-alpha	DR1 associated protein 1	Transcriptional repression is a general mechanism for regulating transcriptional initiation in organisms ranging from yeast to humans. Accurate initiation of transcription from eukaryotic protein-encoding genes requires the assembly of a large multiprotein complex consisting of RNA polymerase II and general transcription factors such as TFIIA, TFIIB, and TFIID. DR1 is a repressor that interacts w…	chr11:65919426-65921563	Cytosol (reliability'])
ABCE1	protein-coding	ABC38|OABP|RLI|RLI1|RNASEL1|RNASELI|RNS4I	ATP binding cassette subfamily E member 1	The protein encoded by this gene is a member of the superfamily of ATP-binding cassette (ABC) transporters. ABC proteins transport various molecules across extra- and intra-cellular membranes. ABC genes are divided into seven distinct subfamilies (ABC1, MDR/TAP, MRP, ALD, OABP, GCN20, White). This protein is a member of the OABP subfamily. Alternatively referred to as the RNase L inhibitor, this …	chr4:145098311-145129524	Cytosol (reliability'])
YEATS2	protein-coding	FAME4	YEATS domain containing 2	Summary: The protein encoded by this gene is a scaffolding subunit of the ATAC complex, which is a complex with acetyltransferase activity on histones H3 and H4. Alternative splicing results in multiple transcript variants encoding different isoforms. [provided by RefSeq, May 2017]	chr3:183697797-183812625	Nucleoplasm (reliability'])
MRPS6	protein-coding	C21orf101|MRP-S6|RPMS6|S6mt	mitochondrial ribosomal protein S6	Mammalian mitochondrial ribosomal proteins are encoded by nuclear genes and help in protein synthesis within the mitochondrion. Mitochondrial ribosomes (mitoribosomes) consist of a small 28S subunit and a large 39S subunit. They have an estimated 75% protein to rRNA composition compared to prokaryotic ribosomes, where this ratio is reversed. Another difference between mammalian mitoribosomes and …	chr21:34073578-34143030	Mitochondria (reliability'])
TADA3	protein-coding	ADA3|NGG1|STAF54|TADA3L|hADA3	transcriptional adaptor 3	DNA-binding transcriptional activator proteins increase the rate of transcription by interacting with the transcriptional machinery bound to the basal promoter in conjunction with adaptor proteins, possibly by acetylation and destabilization of nucleosomes. The protein encoded by this gene is a transcriptional activator adaptor and a component of the histone acetyl transferase (HAT) coactivator c…	chr3:9793011-9779964	Nucleoplasm (reliability'])
TELO2	protein-coding	CLK2|TEL2|YHFS	telomere maintenance 2	This gene encodes a protein that functions as an S-phase checkpoint protein in the cell cycle. The protein may also play a role in DNA repair.[provided by RefSeq, Mar 2009]	chr16:1493345-1510459	Cytosol;Nuclear bodies (reliability'])
TIMM13	protein-coding	TIM13|TIM13B|TIMM13A|TIMM13B|ppv1	translocase of inner mitochondrial membrane 13	This gene encodes a member of the evolutionarily conserved TIMM (translocase of inner mitochondrial membrane) family of proteins that function as chaperones in the import of proteins from the cytoplasm into the mitochondrial inner membrane. Proteins of this family play a role in collecting substrate proteins from the translocase of the outer mitochondrial membrane (TOM) complex and delivering the…	chr19:2427586-2425625	Mitochondria (reliability']); Additional: Nucleoli fibrillar center
ATXN10	protein-coding	E46L|HUMEEP|SCA10	ataxin 10	This gene encodes a protein that may function in neuron survival, neuron differentiation, and neuritogenesis. These roles may be carried out via activation of the mitogen-activated protein kinase cascade. Expansion of an ATTCT repeat from 9-32 copies to 800-4500 copies in an intronic region of this locus has been associated with spinocerebellar ataxia, type 10. Alternatively spliced transcript va…	chr22:45671834-45845307	Cytosol;Plasma membrane (reliability'])
SUPT20H	protein-coding	C13|C13orf19|FAM48A|FP757|P38IP|SPT20	SPT20 homolog, SAGA complex component		chr13:37059714-37009312	Nucleoli fibrillar center (reliability'])
AAMP	protein-coding		angio associated migratory cell protein	The gene is a member of the immunoglobulin superfamily. The encoded protein is associated with angiogenesis, with potential roles in endothelial tube formation and the migration of endothelial cells. It may also regulate smooth muscle cell migration via the RhoA pathway. The encoded protein can bind to heparin and may mediate heparin-sensitive cell adhesion. [provided by RefSeq, Oct 2014]	chr2:218270181-218264127	Microtubules (reliability']); Additional: Cytosol
FTH1	protein-coding	FHC|FTH|FTHL6|HFE5|PIG15|PLIF	ferritin heavy chain 1	This gene encodes the heavy subunit of ferritin, the major intracellular iron storage protein in prokaryotes and eukaryotes. It is composed of 24 subunits of the heavy and light ferritin chains. Variation in ferritin subunit composition may affect the rates of iron uptake and release in different tissues. A major function of ferritin is the storage of iron in a soluble and nontoxic state. Defects…	chr11:61967634-61964285	Microtubules (reliability'])
TAF6L	protein-coding	PAF65A	TATA-box binding protein associated factor 6 like	Initiation of transcription by RNA polymerase II requires the activities of more than 70 polypeptides. The protein that coordinates these activities is transcription factor IID (TFIID), which binds to the core promoter to position the polymerase properly, serves as the scaffold for assembly of the remainder of the transcription complex, and acts as a channel for regulatory signals. TFIID is compo…	chr11:62771396-62787342	Nucleoplasm (reliability'])
YWHAG	protein-coding	14-3-3GAMMA|EIEE56|PPP1R170	tyrosine 3-monooxygenase/tryptophan 5-monooxygenase activation protein gamma	This gene product belongs to the 14-3-3 family of proteins which mediate signal transduction by binding to phosphoserine-containing proteins. This highly conserved protein family is found in both plants and mammals, and this protein is 100% identical to the rat ortholog. It is induced by growth factors in human vascular smooth muscle cells, and is also highly expressed in skeletal and heart muscl…	chr7:76358991-76326799	Cytosol (reliability']); Additional: Nucleoli;Nucleoplasm
INTS10	protein-coding	C8orf35|INT10	integrator complex subunit 10	INTS10 is a subunit of the Integrator complex, which associates with the C-terminal domain of RNA polymerase II large subunit (POLR2A; MIM 180660) and mediates 3-prime end processing of small nuclear RNAs U1 (RNU1; MIM 180680) and U2 (RNU2; MIM 180690) (Baillat et al., 2005 [PubMed 16239144]).[supplied by OMIM, Mar 2008]	chr8:19817149-19852078	Cytosol (reliability']); Additional: Nucleoplasm
SERBP1	protein-coding	CGI-55|CHD3IP|HABP4L|PAI-RBP1|PAIRBP1	SERPINE1 mRNA binding protein 1		chr1:67430402-67407810	Cytosol (reliability'])
GMPS	protein-coding	GATD7	guanine monophosphate synthase	In the de novo synthesis of purine nucleotides, IMP is the branch point metabolite at which point the pathway diverges to the synthesis of either guanine or adenine nucleotides. In the guanine nucleotide pathway, there are 2 enzymes involved in converting IMP to GMP, namely IMP dehydrogenase (IMPD1), which catalyzes the oxidation of IMP to XMP, and GMP synthetase, which catalyzes the amination of…	chr3:155869430-155944020	Cytosol (reliability'])
TADA1	protein-coding	ADA1|HFI1|STAF42|TADA1L|hADA1	transcriptional adaptor 1	TADA1L is a protein subunit of the human STAGA complex (SPT3; (MIM 602947)/TAF9 (MIM 600822)/GCN5 (MIM 602301) acetyltransferase complex), which is a chromatin-modifying multiprotein complex (Martinez et al., 2001 [PubMed 11564863]).[supplied by OMIM, Apr 2009]	chr1:166876264-166856510	Nucleoplasm (reliability']); Additional: Cytosol;Focal adhesion sites
STRAP	protein-coding	MAWD|PT-WD|UNRIP	serine/threonine kinase receptor associated protein		chr12:15882382-15903478	Cytosol (reliability'])
GNB1L	protein-coding	DGCRK3|FKSG1|GY2|WDR14|WDVCF	G protein subunit beta 1 like	This gene encodes a G-protein beta-subunit-like polypeptide which is a member of the WD repeat protein family. WD repeats are minimally conserved regions of approximately 40 amino acids typically bracketed by gly-his and trp-asp (GH-WD), which may facilitate formation of heterotrimeric or multiprotein complexes. Members of this family are involved in a variety of cellular processes, including cel…	chr22:19854874-19783223	Cytosol (reliability'])
HNRNPC	protein-coding	C1|C2|HNRNP|HNRPC|SNRPC	heterogeneous nuclear ribonucleoprotein C	This gene belongs to the subfamily of ubiquitously expressed heterogeneous nuclear ribonucleoproteins (hnRNPs). The hnRNPs are RNA binding proteins and they complex with heterogeneous nuclear RNA (hnRNA). These proteins are associated with pre-mRNAs in the nucleus and appear to influence pre-mRNA processing and other aspects of mRNA metabolism and transport. While all of the hnRNPs are present in…	chr14:21269442-21209147	Nucleoplasm (reliability'])
UBXN2B	protein-coding	p37	UBX domain protein 2B		chr8:58411361-58451501	Nucleoplasm (reliability'])
RBM33	protein-coding	PRR8	RNA binding motif protein 33		chr7:155644494-155781485	Nucleoplasm (reliability'])
CBX3	protein-coding	HECH|HP1-GAMMA|HP1Hs-gamma	chromobox 3	At the nuclear envelope, the nuclear lamina and heterochromatin are adjacent to the inner nuclear membrane. The protein encoded by this gene binds DNA and is a component of heterochromatin. This protein also can bind lamin B receptor, an integral membrane protein found in the inner nuclear membrane. The dual binding functions of the encoded protein may explain the association of heterochromatin w…	chr7:26201443-26213607	Nucleoplasm (reliability']); Additional: Nuclear bodies
XRCC5	protein-coding	KARP-1|KARP1|KU80|KUB2|Ku86|NFIV	X-ray repair cross complementing 5	The protein encoded by this gene is the 80-kilodalton subunit of the Ku heterodimer protein which is also known as ATP-dependant DNA helicase II or DNA repair protein XRCC5. Ku is the DNA-binding component of the DNA-dependent protein kinase, and it functions together with the DNA ligase IV-XRCC4 complex in the repair of DNA double-strand break by non-homologous end joining and the completion of …	chr2:216109348-216206293	Nucleoplasm (reliability'])
PFDN5	protein-coding	MM-1|MM1|PFD5	prefoldin subunit 5	This gene encodes a member of the prefoldin alpha subunit family. The encoded protein is one of six subunits of prefoldin, a molecular chaperone complex that binds and stabilizes newly synthesized polypeptides, thereby allowing them to fold correctly. The complex, consisting of two alpha and four beta subunits, forms a double beta barrel assembly with six protruding coiled-coils. The encoded prot…	chr12:53295542-53299450	Cytosol;Intermediate filaments (reliability'])
NUP50	protein-coding	NPAP60|NPAP60L	nucleoporin 50	The nuclear pore complex is a massive structure that extends across the nuclear envelope, forming a gateway that regulates the flow of macromolecules between the nucleus and the cytoplasm. Nucleoporins are the main components of the nuclear pore complex in eukaryotic cells. The protein encoded by this gene is a member of the FG-repeat containing nucleoporins that functions as a soluble cofactor i…	chr22:45163925-45188017	Nucleoplasm (reliability']); Additional: Nuclear membrane
PTGES3	protein-coding	P23|TEBP|cPGES	prostaglandin E synthase 3	This gene encodes an enzyme that converts prostaglandin endoperoxide H2 (PGH2) to prostaglandin E2 (PGE2). This protein functions as a co-chaperone with heat shock protein 90 (HSP90), localizing to response elements in DNA and disrupting transcriptional activation complexes. Alternative splicing results in multiple transcript variants. There are multiple pseudogenes of this gene on several differ…	chr12:56689575-56663349	Cytosol (reliability']); Additional: Nucleoplasm
MPHOSPH8	protein-coding	HSMPP8|TWA3|mpp8	M-phase phosphoprotein 8		chr13:19633648-19673441	Nucleoplasm (reliability']); Additional: Cytosol;Plasma membrane
FUBP1	protein-coding	FBP|FUBP	far upstream element binding protein 1	The protein encoded by this gene is a single stranded DNA-binding protein that binds to multiple DNA elements, including the far upstream element (FUSE) located upstream of c-myc. Binding to FUSE occurs on the non-coding strand, and is important to the regulation of c-myc in undifferentiated cells. This protein contains three domains, an amphipathic helix N-terminal domain, a DNA-binding central …	chr1:77979435-77944055	Nucleoplasm (reliability'])
TTI1	protein-coding	KIAA0406|smg-10	TELO2 interacting protein 1		chr20:38033461-37983014	Vesicles (reliability']); Additional: Nucleoplasm
SMG5	protein-coding	EST1B|LPTS-RP1|LPTSRP1|SMG-5	SMG5 nonsense mediated mRNA decay factor	SMG5 is involved in nonsense-mediated mRNA decay (Ohnishi et al., 2003 [PubMed 14636577]).[supplied by OMIM, Mar 2008]	chr1:156291516-156249224	Cytoplasmic bodies (reliability'])
TAF5L	protein-coding	PAF65B	TATA-box binding protein associated factor 5 like	The product of this gene belongs to the WD-repeat TAF5 family of proteins. This gene encodes a protein that is a component of the PCAF histone acetylase complex. The PCAF histone acetylase complex, which is composed of more than 20 polypeptides some of which are TAFs, is required for myogenic transcription and differentiation. TAFs may participate in basal transcription, serve as coactivators, fu…	chr1:229626122-229593111	Nuclear speckles (reliability']); Additional: Cytoplasmic bodies
GTF3C3	protein-coding	TFIIIC102|TFIIICgamma|TFiiiC2-102	general transcription factor IIIC subunit 3	The protein encoded by this gene is part of the TFIIIC2 complex, which binds to the promoters of small nuclear and cytoplasmic RNA genes in order to recruit RNA polymerase III. The TFIIIC2 complex is composed of six subunits. Two transcript variants encoding different isoforms have been found for this gene. [provided by RefSeq, Oct 2011]	chr2:196799683-196763035	Nuclear membrane;Nucleoplasm (reliability'])
GTF2H3	protein-coding	BTF2|P34|TFB4|TFIIH	general transcription factor IIH subunit 3	This gene encodes a member of the TFB4 family. The encoded protein is a subunit of the core-TFIIH basal transcription factor and localizes to the nucleus. The encoded protein is involved in RNA transcription by RNA polymerase II and nucleotide excision repair and associates with the Cdk-activating kinase complex. Alternative splicing results in multiple transcript variants. A related pseudogene h…	chr12:123633829-123662604	Nucleoplasm (reliability'])
LSM14A	protein-coding	C19orf13|FAM61A|RAP55|RAP55A	LSM14A mRNA processing body assembly factor	Sm-like proteins were identified in a variety of organisms based on sequence homology with the Sm protein family (see SNRPD2; 601061). Sm-like proteins contain the Sm sequence motif, which consists of 2 regions separated by a linker of variable length that folds as a loop. The Sm-like proteins are thought to form a stable heteromer present in tri-snRNP particles, which are important for pre-mRNA …	chr19:34172499-34229288	Cytoplasmic bodies (reliability']); Additional: Cytosol
MAU2	protein-coding	KIAA0892|MAU2L|SCC4|mau-2	MAU2 sister chromatid cohesion factor		chr19:19320607-19358754	Nucleoplasm (reliability']); Additional: Nuclear bodies
CREBBP	protein-coding	CBP|KAT3A|MKHK1|RSTS|RSTS1	CREB binding protein	This gene is ubiquitously expressed and is involved in the transcriptional coactivation of many different transcription factors. First isolated as a nuclear protein that binds to cAMP-response element binding protein (CREB), this gene is now known to play critical roles in embryonic development, growth control, and homeostasis by coupling chromatin remodeling to transcription factor recognition. …	chr16:3880727-3725054	Nucleoplasm (reliability']); Additional: Nuclear bodies
CMTR1	protein-coding	FTSJD2|KIAA0082|MTr1|hMTr1	cap methyltransferase 1		chr6:37433214-37482844	Nucleoplasm (reliability']); Additional: Cytosol
HEXIM1	protein-coding	CLP1|EDG1|HIS1|MAQ1	HEXIM P-TEFb complex subunit 1	Expression of this gene is induced by hexamethylene-bis-acetamide in vascular smooth muscle cells. This gene has no introns. [provided by RefSeq, Jul 2008]	chr17:45148475-45152099	Nucleoplasm (reliability']); Additional: Vesicles
TUBB4B	protein-coding	Beta2|LCAEOD|TUBB2|TUBB2C	tubulin beta 4B class IVb		chr9:137241287-137243707	Microtubules (reliability'])
ING5	-0.30334	protein-coding	p28ING5	inhibitor of growth family member 5	This gene encodes a tumor suppressor protein that inhibits cell growth and induces apoptosis. This protein contains a PHD-type zinc finger. It interacts with tumor suppressor p53 and p300, a component of the histone acetyl transferase complex, suggesting a role in transcriptional regulation. Alternative splicing and the use of multiple promoters and 3' terminal exons results in multiple transcrip…	chr2:241687017-241729481
DR1	protein-coding	NC2|NC2-BETA|NC2B|NCB2	down-regulator of transcription 1	This gene encodes a TBP- (TATA box-binding protein) associated phosphoprotein that represses both basal and activated levels of transcription. The encoded protein is phosphorylated in vivo and this phosphorylation affects its interaction with TBP. This protein contains a histone fold motif at the amino terminus, a TBP-binding domain, and a glutamine- and alanine-rich region. The binding of DR1 re…	chr1:93345907-93369493	Nucleoplasm (reliability'])
TRRAP	protein-coding	DEDDFA|DFNA75|PAF350/400|PAF400|STAF40|TR-AP|Tra1	transformation/transcription domain associated protein	This gene encodes a large multidomain protein of the phosphoinositide 3-kinase-related kinases (PIKK) family. The encoded protein is a common component of many histone acetyltransferase (HAT) complexes and plays a role in transcription and DNA repair by recruiting HAT complexes to chromatin. Deregulation of this gene may play a role in several types of cancer including glioblastoma multiforme. Al…	chr7:98878532-99013241	Nucleoplasm (reliability']); Additional: Golgi apparatus
MED12	protein-coding	ARC240|CAGH45|FGS1|HOPA|Kto|MED12S|OHDOX|OKS|OPA1|TNRC11|TRAP230	mediator complex subunit 12	The initiation of transcription is controlled in part by a large protein assembly known as the preinitiation complex. A component of this preinitiation complex is a 1.2 MDa protein aggregate called Mediator. This Mediator component binds with a CDK8 subcomplex which contains the protein encoded by this gene, mediator complex subunit 12 (MED12), along with MED13, CDK8 kinase, and cyclin C. The CDK…	chrX:71118596-71142450	Nucleoplasm (reliability'])
BTAF1	protein-coding	MOT1|TAF172|TAFII170	B-TFIID TATA-box binding protein associated factor 1	This gene encodes a TAF (TATA box-binding protein-associated factor), which associates with TBP (TATA box-binding protein) to form the B-TFIID complex that is required for transcription initiation of genes by RNA polymerase II. This TAF has DNA-dependent ATPase activity, which drives the dissociation of TBP from DNA, freeing the TBP to associate with other TATA boxes or TATA-less promoters. [prov…	chr10:91923770-92031437	Nucleoplasm;Vesicles (reliability'])
SETX	protein-coding	ALS4|AOA2|SCAN2|SCAR1|Sen1|bA479K20.2	senataxin	This gene encodes a protein named for its homology to the Sen1p protein of fungi which has RNA helicase activity encoded by a domain at the C-terminal end of the protein. The protein encoded by this gene contains a DNA/RNA helicase domain at its C-terminal end which suggests that it may be involved in both DNA and RNA processing. Mutations in this gene have been associated with ataxia-ocular apra…	chr9:132356726-132261356	Nucleoplasm (reliability']); Additional: Cytokinetic bridge
ZNF638	protein-coding	NP220|ZFML|Zfp638	zinc finger protein 638	The protein encoded by this gene is a nucleoplasmic protein. It binds cytidine-rich sequences in double-stranded DNA. This protein has three types of domains: MH1, MH2 (repeated three times) and MH3. It is associated with packaging, transferring, or processing transcripts. Multiple alternatively spliced transcript variants have been found for this gene, but the biological validity of some variant…	chr2:71331782-71435061	Nucleoplasm (reliability']); Additional: Vesicles
EDC3	protein-coding	LSM16|MRT50|YJDC|YJEFN2|hYjeF_N2-15q23	enhancer of mRNA decapping 3	This gene encodes a protein that is important in mRNA degradation. The encoded protein is a component of a decapping complex that promotes efficient removal of the monomethylguanosine (m7G) cap from mRNAs, as part of the 5' to 3' mRNA decay pathway. Mutations in this gene have been identified in human patients with an autosomal recessive form of intellectual disability. [provided by RefSeq, May 2…	chr15:74696434-74630558	Cytoplasmic bodies (reliability'])
DCP2	protein-coding	NUDT20	decapping mRNA 2	The protein encoded by this gene is a key component of an mRNA-decapping complex required for degradation of mRNAs, both in normal mRNA turnover, and in nonsense-mediated mRNA decay (NMD). It removes the 7-methyl guanine cap structure from mRNA, prior to its degradation from the 5' end. Alternatively spliced transcript variants encoding different isoforms have been noted for this gene.[provided b…	chr5:112976702-113022195	Cytoplasmic bodies;Nucleoplasm (reliability']); Additional: Cell Junctions
EDC4	protein-coding	GE1|Ge-1|HEDL5|HEDLS|RCD-8|RCD8	enhancer of mRNA decapping 4		chr16:67873052-67884499	Cytoplasmic bodies (reliability']); Additional: Nucleoplasm
DDX6	protein-coding	HLR2|IDDILF|P54|RCK|Rck/p54	DEAD-box helicase 6	This gene encodes a member of the DEAD box protein family. The protein is an RNA helicase found in P-bodies and stress granules, and functions in translation suppression and mRNA degradation. It is required for microRNA-induced gene silencing. Multiple alternatively spliced variants, encoding the same protein, have been identified. [provided by RefSeq, Mar 2012]	chr11:118791696-118747763	Cytoplasmic bodies (reliability']); Additional: Cytosol
HDHD2	protein-coding	3110052N05Rik|HEL-S-301	haloacid dehalogenase like hydrolase domain containing 2		chr18:47150520-47107410	Vesicles (reliability'])
RPS18	protein-coding	D6S218E|HKE3|KE-3|KE3|S18	ribosomal protein S18	Ribosomes, the organelles that catalyze protein synthesis, consist of a small 40S subunit and a large 60S subunit. Together these subunits are composed of 4 RNA species and approximately 80 structurally distinct proteins. This gene encodes a ribosomal protein that is a component of the 40S subunit. The protein belongs to the S13P family of ribosomal proteins. It is located in the cytoplasm. The g…	chr6:33272075-33276511	Cytosol (reliability'])
AGFG1	protein-coding	HRB|RAB|RIP	ArfGAP with FG repeats 1	The protein encoded by this gene is related to nucleoporins, a class of proteins that mediate nucleocytoplasmic transport. The encoded protein binds the activation domain of the human immunodeficiency virus Rev protein when Rev is assembled onto its RNA target, and is required for the nuclear export of Rev-directed RNAs. Multiple transcript variants encoding different isoforms have been found for…	chr2:227472156-227561217	Vesicles (reliability'])
ZNF592	protein-coding	CAMOS|SCAR5	zinc finger protein 592	This gene is thought to play a role in a complex developmental pathway and the regulation of genes involved in cerebellar development. Mutations in this gene have been associated with autosomal recessive spinocerebellar ataxia. [provided by RefSeq, Jan 2011]	chr15:84748556-84806445	Nucleoplasm (reliability'])
NAA20	protein-coding	NAT3|NAT3P|NAT5|NAT5P|dJ1002M8.1	N-alpha-acetyltransferase 20, NatB catalytic subunit	NAT5 is a component of N-acetyltransferase complex B (NatB). Human NatB performs cotranslational N(alpha)-terminal acetylation of methionine residues when they are followed by asparagine (Starheim et al., 2008 [PubMed 18570629]).[supplied by OMIM, Apr 2009]	chr20:20017290-20033655	Cytosol (reliability'])
SDHD	-0.40809	protein-coding	CBT1|CII-4|CWS3|PGL|PGL1|QPs3|SDH4|cybS	succinate dehydrogenase complex subunit D	This gene encodes a member of complex II of the respiratory chain, which is responsible for the oxidation of succinate. The encoded protein is one of two integral membrane proteins anchoring the complex to the matrix side of the mitochondrial inner membrane. Mutations in this gene are associated with the formation of tumors, including hereditary paraganglioma. Transmission of disease occurs almos…	chr11:112086873-112095794
SCAF11	protein-coding	CASP11|SFRS2IP|SIP1|SRRP129|SRSF2IP	SR-related CTD associated factor 11		chr12:45992040-45919131	Nucleoplasm (reliability']); Additional: Nuclear bodies
KBTBD2	protein-coding	BKLHD1	kelch repeat and BTB domain containing 2		chr7:32892144-32868172	Nucleoli fibrillar center;Nucleoplasm (reliability'])
MTFR1	protein-coding	CHPPR|FAM54A2	mitochondrial fission regulator 1	This gene encodes a mitochondrial protein that is characterized by a poly-proline rich region. A chicken homolog of this protein promotes mitochondrial fission and the mouse homolog protects cells from oxidative stress. A related pseudogene of this gene is found on chromosome X. [provided by RefSeq, Mar 2009]	chr8:65643873-65771252	Mitochondria (reliability']); Additional: Cytosol
IMPDH2	protein-coding	IMPD2|IMPDH-II	inosine monophosphate dehydrogenase 2	This gene encodes the rate-limiting enzyme in the de novo guanine nucleotide biosynthesis. It is thus involved in maintaining cellular guanine deoxy- and ribonucleotide pools needed for DNA and RNA synthesis. The encoded protein catalyzes the NAD-dependent oxidation of inosine-5'-monophosphate into xanthine-5'-monophosphate, which is then converted into guanosine-5'-monophosphate. This gene is up…	chr3:49029750-49024325	Cytosol (reliability']); Additional: Rods & Rings
LUC7L2	protein-coding	CGI-59|CGI-74|LUC7B2	LUC7 like 2, pre-mRNA splicing factor	This gene encodes a protein that contains a C2H2-type zinc finger, coiled-coil region and arginine, serine-rich (RS) domain. A similar protein in mouse interacts with sodium channel modifier 1, and the encoded protein may be involved in the recognition of non-consensus splice donor sites in association with the U1 snRNP spliceosomal subunit. Alternatively spliced transcript variants encoding mult…	chr7:139340472-139423454	Nucleoplasm (reliability'])
TBC1D5	protein-coding		TBC1 domain family member 5		chr3:17742739-17157162	Vesicles (reliability']); Additional: Golgi apparatus
CCT2	protein-coding	99D8.1|CCT-beta|CCTB|HEL-S-100n|PRO1633|TCP-1-beta	chaperonin containing TCP1 subunit 2	The protein encoded by this gene is a molecular chaperone that is a member of the chaperonin containing TCP1 complex (CCT), also known as the TCP1 ring complex (TRiC). This complex consists of two identical stacked rings, each containing eight different proteins. Unfolded polypeptides enter the central cavity of the complex and are folded in an ATP-dependent manner. The complex folds various prot…	chr12:69585459-69601570	Cytosol (reliability'])
POLR2H	protein-coding	RPABC3|RPB17|RPB8	RNA polymerase II, I and III subunit H	The three eukaryotic RNA polymerases are complex multisubunit enzymes that play a central role in the transcription of nuclear genes. This gene encodes an essential and highly conserved subunit of RNA polymerase II that is shared by the other two eukaryotic DNA-directed RNA polymerases, I and III. Alternative splicing results in multiple transcript variants of this gene. [provided by RefSeq, Jul …	chr3:184361710-184368594	Nucleoplasm (reliability'])
VHL	protein-coding	HRCA1|RCA1|VHL1|pVHL	von Hippel-Lindau tumor suppressor	Von Hippel-Lindau syndrome (VHL) is a dominantly inherited familial cancer syndrome predisposing to a variety of malignant and benign tumors. A germline mutation of this gene is the basis of familial inheritance of VHL syndrome. The protein encoded by this gene is a component of the protein complex that includes elongin B, elongin C, and cullin-2, and possesses ubiquitin ligase E3 activity. This …	chr3:10141778-10153667	Nucleoplasm (reliability']); Additional: Cytosol
MRPS10	protein-coding	MRP-S10|PNAS-122	mitochondrial ribosomal protein S10	Mammalian mitochondrial ribosomal proteins are encoded by nuclear genes and help in protein synthesis within the mitochondrion. Mitochondrial ribosomes (mitoribosomes) consist of a small 28S subunit and a large 39S subunit. They have an estimated 75% protein to rRNA composition compared to prokaryotic ribosomes, where this ratio is reversed. Another difference between mammalian mitoribosomes and …	chr6:42217870-42206801	Mitochondria (reliability']); Additional: Actin filaments
PRPS2	protein-coding	PRSII	phosphoribosyl pyrophosphate synthetase 2	This gene encodes a phosphoribosyl pyrophosphate synthetase that plays a central role in the synthesis of purines and pyrimidines. The encoded protein catalyzes the synthesis of 5-phosphoribosyl 1-pyrophosphate from ATP and D-ribose 5-phosphate. Alternate splicing results in multiple transcript variants. [provided by RefSeq, Mar 2010]	chrX:12791412-12824222	Vesicles (reliability'])
TRAPPC11	-0.25823	protein-coding	C4orf41|FOIGR|GRY|LGMD2S|LGMDR18	trafficking protein particle complex 11	The protein encoded by this gene is a subunit of the TRAPP (transport protein particle) tethering complex, which functions in intracellular vesicle trafficking. This subunit is involved in early stage endoplasmic reticulum-to-Golgi vesicle transport. Alternative splicing of this gene results in multiple transcript variants. [provided by RefSeq, Jan 2013]	chr4:183659277-183713592
CYBA	0.075867	protein-coding	CGD4|p22-PHOX	cytochrome b-245 alpha chain	Cytochrome b is comprised of a light chain (alpha) and a heavy chain (beta). This gene encodes the light, alpha subunit which has been proposed as a primary component of the microbicidal oxidase system of phagocytes. Mutations in this gene are associated with autosomal recessive chronic granulomatous disease (CGD), that is characterized by the failure of activated phagocytes to generate superoxid…	chr16:88651079-88643289
UBE2M	protein-coding	UBC-RS2|UBC12|hUbc12	ubiquitin conjugating enzyme E2 M	The modification of proteins with ubiquitin is an important cellular mechanism for targeting abnormal or short-lived proteins for degradation. Ubiquitination involves at least three classes of enzymes: ubiquitin-activating enzymes, or E1s, ubiquitin-conjugating enzymes, or E2s, and ubiquitin-protein ligases, or E3s. This gene encodes a member of the E2 ubiquitin-conjugating enzyme family. The enc…	chr19:58558611-58555712	Nucleoplasm (reliability']); Additional: Cytosol;Nuclear bodies
SEC11C	protein-coding	SEC11L3|SPC21|SPCS4C	SEC11 homolog C, signal peptidase complex subunit		chr18:59139884-59158837	Nuclear membrane (reliability']); Additional: Golgi apparatus
MRPL40	protein-coding	L40mt|MRP-L22|MRP-L40|MRPL22|NLVCF|URIM	mitochondrial ribosomal protein L40	Mammalian mitochondrial ribosomal proteins are encoded by nuclear genes and help in protein synthesis within the mitochondrion. Mitochondrial ribosomes (mitoribosomes) consist of a small 28S subunit and a large 39S subunit. They have an estimated 75% protein to rRNA composition compared to prokaryotic ribosomes, where this ratio is reversed. Another difference between mammalian mitoribosomes and …	chr22:19432545-19436078	Mitochondria (reliability']); Additional: Nucleoli
UBXN6	protein-coding	UBXD1|UBXDC2	UBX domain protein 6		chr19:4458759-4445006	Cytosol;Golgi apparatus (reliability'])
NRDE2	protein-coding	C14orf102	NRDE-2, necessary for RNA interference, domain containing		chr14:90331969-90267860	Mitochondria;Nucleoplasm (reliability'])
FLNC	protein-coding	ABP-280|ABP280A|ABPA|ABPL|CMH26|FLN2|MFM5|MPD4|RCM5	filamin C	This gene encodes one of three related filamin genes, specifically gamma filamin. These filamin proteins crosslink actin filaments into orthogonal networks in cortical cytoplasm and participate in the anchoring of membrane proteins for the actin cytoskeleton. Three functional domains exist in filamin: an N-terminal filamentous actin-binding domain, a C-terminal self-association domain, and a memb…	chr7:128830406-128859272	Cytosol;Plasma membrane (reliability'])
CETN2	-0.075181	protein-coding	CALT|CEN2	centrin 2	Caltractin belongs to a family of calcium-binding proteins and is a structural component of the centrosome. The high level of conservation from algae to humans and its association with the centrosome suggested that caltractin plays a fundamental role in the structure and function of the microtubule-organizing center, possibly required for the proper duplication and segregation of the centrosome. …	chrX:152830757-152826994
GLI4	protein-coding	HKR4|ZNF928	GLI family zinc finger 4		chr8:143267445-143276931	Cytokinetic bridge;Nucleoplasm (reliability'])
GAPVD1	protein-coding	GAPEX5|GAPex-5|RAP6	GTPase activating protein and VPS9 domains 1		chr9:125261794-125367207	Cytosol;Plasma membrane (reliability'])
TSC2	protein-coding	LAM|PPP1R160|TSC4	TSC complex subunit 2	Mutations in this gene lead to tuberous sclerosis complex. Its gene product is believed to be a tumor suppressor and is able to stimulate specific GTPases. The protein associates with hamartin in a cytosolic complex, possibly acting as a chaperone for hamartin. Alternative splicing results in multiple transcript variants encoding different isoforms. [provided by RefSeq, Jul 2008]	chr16:2047804-2089491	Cytosol (reliability'])
LSM5	-1.0037	protein-coding	YER146W	LSM5 homolog, U6 small nuclear RNA and mRNA degradation associated	Sm-like proteins were identified in a variety of organisms based on sequence homology with the Sm protein family (see SNRPD2; MIM 601061). Sm-like proteins contain the Sm sequence motif, which consists of 2 regions separated by a linker of variable length that folds as a loop. The Sm-like proteins are thought to form a stable heteromer present in tri-snRNP particles, which are important for pre-m…	chr7:32495283-32485338
MPV17	-0.15642	protein-coding	CMT2EE|MTDPS6|SYM1	mitochondrial inner membrane protein MPV17	This gene encodes a mitochondrial inner membrane protein that is implicated in the metabolism of reactive oxygen species. Mutations in this gene have been associated with the hepatocerebral form of mitochondrial DNA depletion syndrome (MDDS). [provided by RefSeq, Jul 2008]	chr2:27323097-27309492
EIF3C	protein-coding	EIF3CL|EIF3S8|eIF3-p110	eukaryotic translation initiation factor 3 subunit C		chr16:28688558-28735730	Cytosol (reliability'])
COMMD9	protein-coding	C11orf55|HSPC166|LINC00610	COMM domain containing 9		chr11:36289428-36272292	Nucleoplasm (reliability']); Additional: Cytosol;Golgi apparatus
COPS8	protein-coding	COP9|CSN8|SGN8	COP9 signalosome subunit 8	The protein encoded by this gene is one of the eight subunits of COP9 signalosome, a highly conserved protein complex that functions as an important regulator in multiple signaling pathways. The structure and function of COP9 signalosome is similar to that of the 19S regulatory particle of 26S proteasome. COP9 signalosome has been shown to interact with SCF-type E3 ubiquitin ligases and act as a …	chr2:237085889-237100474	Nucleoplasm (reliability']); Additional: Cytosol
PABPN1	protein-coding	OPMD|PAB2|PABII|PABP-2|PABP2	poly(A) binding protein nuclear 1	This gene encodes an abundant nuclear protein that binds with high affinity to nascent poly(A) tails. The protein is required for progressive and efficient polymerization of poly(A) tails at the 3' ends of eukaryotic transcripts and controls the size of the poly(A) tail to about 250 nt. At steady-state, this protein is localized in the nucleus whereas a different poly(A) binding protein is locali…	chr14:23320188-23326185	Nucleoplasm (reliability']); Additional: Nuclear speckles
RAD23B	protein-coding	HHR23B|HR23B|P58	RAD23 homolog B, nucleotide excision repair protein	The protein encoded by this gene is one of two human homologs of Saccharomyces cerevisiae Rad23, a protein involved in the nucleotide excision repair (NER). This protein was found to be a component of the protein complex that specifically complements the NER defect of xeroderma pigmentosum group C (XP-c) cell extracts in vitro. This protein was also shown to interact with, and elevate the nucleot…	chr9:107283279-107332194	Cytosol;Nucleoplasm (reliability'])
SNRNP200	protein-coding	ASCC3L1|BRR2|HELIC2|RP33|U5-200KD	small nuclear ribonucleoprotein U5 subunit 200	Pre-mRNA splicing is catalyzed by the spliceosome, a complex of specialized RNA and protein subunits that removes introns from a transcribed pre-mRNA segment. The spliceosome consists of small nuclear RNA proteins (snRNPs) U1, U2, U4, U5 and U6, together with approximately 80 conserved proteins. U5 snRNP contains nine specific proteins. This gene encodes one of the U5 snRNP-specific proteins. Thi…	chr2:96305546-96274338	Nucleoplasm (reliability'])
KLF5	protein-coding	BTEB2|CKLF|IKLF	Kruppel like factor 5	This gene encodes a member of the Kruppel-like factor subfamily of zinc finger proteins. The encoded protein is a transcriptional activator that binds directly to a specific recognition motif in the promoters of target genes. This protein acts downstream of multiple different signaling pathways and is regulated by post-translational modification. It may participate in both promoting and suppressi…	chr13:73054976-73077538	Nucleoplasm (reliability']); Additional: Golgi apparatus;Vesicles
LETM1	protein-coding	SLC55A1	leucine zipper and EF-hand containing transmembrane protein 1	This gene encodes a protein that is localized to the inner mitochondrial membrane. The protein functions to maintain the mitochondrial tubular shapes and is required for normal mitochondrial morphology and cellular viability. Mutations in this gene cause Wolf-Hirschhorn syndrome, a complex malformation syndrome caused by the deletion of parts of the distal short arm of chromosome 4. Related pseud…	chr4:1856156-1811479	Mitochondria (reliability'])
NPM1	protein-coding	B23|NPM	nucleophosmin 1	The protein encoded by this gene is involved in several cellular processes, including centrosome duplication, protein chaperoning, and cell proliferation. The encoded phosphoprotein shuttles between the nucleolus, nucleus, and cytoplasm, chaperoning ribosomal proteins and core histones from the nucleus to the cytoplasm. This protein is also known to sequester the tumor suppressor ARF in the nucle…	chr5:171387116-171410900	Nucleoli (reliability']); Additional: Nucleoplasm
NOP10	protein-coding	DKCB1|NOLA3|NOP10P	NOP10 ribonucleoprotein	This gene is a member of the H/ACA snoRNPs (small nucleolar ribonucleoproteins) gene family. snoRNPs are involved in various aspects of rRNA processing and modification and have been classified into two families: C/D and H/ACA. The H/ACA snoRNPs also include the DKC1, NOLA1 and NOLA2 proteins. These four H/ACA snoRNP proteins localize to the dense fibrillar components of nucleoli and to coiled (C…	chr15:34343136-34341719	Nuclear bodies (reliability'])
WBP1L	protein-coding	C10orf26|OPA1L|OPAL1	WW domain binding protein 1 like		chr10:102742708-102816267	Microtubules (reliability']); Additional: Nucleoplasm
RPL35A	-0.52959	protein-coding	DBA5|L35A|eL33	ribosomal protein L35a	Ribosomes, the organelles that catalyze protein synthesis, consist of a small 40S subunit and a large 60S subunit. Together these subunits are composed of 4 RNA species and approximately 80 structurally distinct proteins. This gene encodes a ribosomal protein that is a component of the 60S subunit. The protein belongs to the L35AE family of ribosomal proteins. It is located in the cytoplasm. The …	chr3:197950190-197956610
CCT3	protein-coding	CCT-gamma|CCTG|PIG48|TCP-1-gamma|TRIC5	chaperonin containing TCP1 subunit 3	The protein encoded by this gene is a molecular chaperone that is a member of the chaperonin containing TCP1 complex (CCT), also known as the TCP1 ring complex (TRiC). This complex consists of two identical stacked rings, each containing eight different proteins. Unfolded polypeptides enter the central cavity of the complex and are folded in an ATP-dependent manner. The complex folds various prot…	chr1:156338292-156308968	Cytosol;Plasma membrane (reliability'])
GINS2	protein-coding	HSPC037|PSF2|Pfs2	GINS complex subunit 2	The yeast heterotetrameric GINS complex is made up of Sld5 (GINS4; MIM 610611), Psf1 (GINS1; MIM 610608), Psf2, and Psf3 (GINS3; MIM 610610). The formation of this complex is essential for the initiation of DNA replication in yeast and Xenopus egg extracts (Ueno et al., 2005 [PubMed 16287864]). See GINS1 for additional information about the GINS complex.[supplied by OMIM, Mar 2008]	chr16:85688954-85676198	Nucleoplasm (reliability'])
CENPQ	protein-coding	C6orf139|CENP-Q	centromere protein Q	CENPQ is a subunit of a CENPH (MIM 605607)-CENPI (MIM 300065)-associated centromeric complex that targets CENPA (MIM 117139) to centromeres and is required for proper kinetochore function and mitotic progression (Okada et al., 2006 [PubMed 16622420]).[supplied by OMIM, Mar 2008]	chr6:49463327-49493107	Nucleoplasm (reliability'])
BORA	protein-coding	C13orf34	BORA aurora kinase A activator	BORA is an activator of the protein kinase Aurora A (AURKA; MIM 603072), which is required for centrosome maturation, spindle assembly, and asymmetric protein localization during mitosis (Hutterer et al., 2006 [PubMed 16890155]).[supplied by OMIM, Mar 2008]	chr13:72727923-72756196	Nucleoli fibrillar center;Nucleoplasm (reliability']); Additional: Cytosol
DDX51	protein-coding		DEAD-box helicase 51		chr12:132144335-132136594	Nucleoli;Nucleoplasm (reliability']); Additional: Cytosol
DUT	protein-coding	dUTPase	deoxyuridine triphosphatase	This gene encodes an essential enzyme of nucleotide metabolism. The encoded protein forms a ubiquitous, homotetrameric enzyme that hydrolyzes dUTP to dUMP and pyrophosphate. This reaction serves two cellular purposes: providing a precursor (dUMP) for the synthesis of thymine nucleotides needed for DNA replication, and limiting intracellular pools of dUTP. Elevated levels of dUTP lead to increased…	chr15:48329991-48343373	Nucleoplasm (reliability'])
TSPYL2	-0.14064	protein-coding	CDA1|CINAP|CTCL|DENTT|HRIHFB2216|NP79|SE204|TSPX	TSPY like 2	This gene encodes a member of the testis-specific protein Y-encoded, TSPY-like/SET/nucleosome assembly protein-1 superfamily. The encoded protein is localized to the nucleolus where it functions in chromatin remodeling and as an inhibitor of cell-cycle progression. This protein may play a role in the suppression of tumor growth. [provided by RefSeq, Sep 2009]	chrX:53082367-53088540
RRP15	protein-coding	CGI-115|KIAA0507	ribosomal RNA processing 15 homolog	This gene encodes a protein that co-purifies with human nucleoli. A similar protein in budding yeast is a component of pre-60S ribosomal particles, and is required for the early maturation steps of the 60S subunit. [provided by RefSeq, Jul 2008]	chr1:218285293-218337983	Nucleoli (reliability']); Additional: Mitochondria;Nucleoplasm
TEX264	protein-coding	ZSIG11	testis expressed 264, ER-phagy receptor		chr3:51671252-51704323	Cytosol;Nucleoli (reliability'])
MTPAP	protein-coding	PAPD1|SPAX4|TENT6	mitochondrial poly(A) polymerase	The protein encoded by this gene is a member of the DNA polymerase type-B-like family. This enzyme synthesizes the 3' poly(A) tail of mitochondrial transcripts and plays a role in replication-dependent histone mRNA degradation.[provided by RefSeq, Jan 2011]	chr10:30349278-30309801	Mitochondria (reliability'])
C11orf24	protein-coding	DM4E3	chromosome 11 open reading frame 24		chr11:68271973-68261338	Nucleoplasm (reliability']); Additional: Vesicles
MON2	protein-coding		MON2 homolog, regulator of endosome-to-Golgi trafficking		chr12:62466817-62600476	Nucleoli fibrillar center;Nucleoplasm (reliability'])
TRIM27	protein-coding	RFP|RNF76	tripartite motif containing 27	This gene encodes a member of the tripartite motif (TRIM) family. The TRIM motif includes three zinc-binding domains, a RING, a B-box type 1 and a B-box type 2, and a coiled-coil region. This protein localizes to the nuclear matrix. It interacts with the enhancer of polycomb protein and represses gene transcription. It is also thought to be involved in the differentiation of male germ cells. Fusi…	chr6:28923985-28903002	Nucleoli (reliability']); Additional: Nucleoplasm
SDE2	protein-coding	C1orf55|dJ671D7.1	SDE2 telomere maintenance homolog		chr1:225999343-225982702	Nuclear speckles (reliability']); Additional: Cytosol;Golgi apparatus;Plasma membrane
EIF3CL	protein-coding		eukaryotic translation initiation factor 3 subunit C like	The protein encoded by this gene is a core subunit of the eukaryotic translation initiation factor 3 (eIF3) complex. The encoded protein is nearly identical to another protein, eIF3c, from a related gene. The eIF3 complex binds the 40S ribosome and mRNAs to enable translation initiation. Several transcript variants encoding the same protein have been found for this gene. [provided by RefSeq, Dec …	chr16:28403885-28379581	Cytosol (reliability'])
JAGN1	protein-coding	GL009|SCN6	jagunal homolog 1	The protein encoded by this gene is a transmembrane protein. It functions in the early secretory pathway and is necessary for neutrophil differentiation and survival. Mutations in this gene result in severe congenital neutropenia. [provided by RefSeq, Oct 2014]	chr3:9890610-9894349	Vesicles (reliability'])
NVL	protein-coding	NVL2	nuclear VCP like	This gene encodes a member of the AAA (ATPases associated with diverse cellular activities) superfamily. Multiple transcript variants encoding different isoforms have been found for this gene. Two encoded proteins, described as major and minor isoforms, have been localized to distinct regions of the nucleus. The largest encoded protein (major isoform) has been localized to the nucleolus and shown…	chr1:224330187-224227345	Nucleoli (reliability'])
TPRA1	protein-coding	GPR175|TMEM227|TPRA40	transmembrane protein adipocyte associated 1		chr3:127598231-127571232	Vesicles (reliability'])
SLC16A6	protein-coding	MCT6|MCT7	solute carrier family 16 member 6		chr17:68291439-68267026	Vesicles (reliability'])
EIF4A1	protein-coding	DDX2A|EIF-4A|EIF4A|eIF-4A-I|eIF4A-I	eukaryotic translation initiation factor 4A1		chr17:7572825-7579006	Cytosol (reliability'])
DPH3	protein-coding	DELGIP|DELGIP1|DESR1|DPH3A|KTI11|ZCSL2	diphthamide biosynthesis 3	This gene encodes a CSL zinc finger-containing protein that is required for dipthamide biosynthesis. The encoded protein is necessary for the initial step in the modification of a histidine residue in elongation factor-2 to diphthamide. This modified residue is a target for ADP ribosylation by the bacterial toxins diphtheria toxin and Pseudomonas exotoxin A. Alternative splicing results in multip…	chr3:16264943-16257061	Nucleoplasm (reliability']); Additional: Cytosol
RUVBL2	protein-coding	CGI-46|ECP-51|ECP51|INO80J|REPTIN|RVB2|TAP54-beta|TIH2|TIP48|TIP49B	RuvB like AAA ATPase 2	This gene encodes the second human homologue of the bacterial RuvB gene. Bacterial RuvB protein is a DNA helicase essential for homologous recombination and DNA double-strand break repair. Functional analysis showed that this gene product has both ATPase and DNA helicase activities. This gene is physically linked to the CGB/LHB gene cluster on chromosome 19q13.3, and is very close (55 nt) to the …	chr19:48993448-49015995	Cytosol;Nucleoplasm (reliability']); Additional: Centrosome
TAF1C	protein-coding	MGC:39976|SL1|TAFI110|TAFI95	TATA-box binding protein associated factor, RNA polymerase I subunit C	Initiation of transcription by RNA polymerase I requires the formation of a complex composed of the TATA-binding protein (TBP) and three TBP-associated factors (TAFs) specific for RNA polymerase I. This complex, known as SL1, binds to the core promoter of ribosomal RNA genes to position the polymerase properly and acts as a channel for regulatory signals. This gene encodes the largest SL1-specifi…	chr16:84187065-84177852	Nucleoli fibrillar center;Nucleoplasm (reliability'])
NR2C2AP	protein-coding	TRA16	nuclear receptor 2C2 associated protein		chr19:19203414-19201409	Nucleoplasm (reliability'])
CALM3	0.1785	protein-coding	CALM|CAM1|CAM2|CAMB|CPVT6|CaM|CaMIII|HEL-S-72|LQT16|PHKD|PHKD3	calmodulin 3	This gene encodes a member of a family of proteins that binds calcium and functions as a enzymatic co-factor. Activity of this protein is important in the regulation of the cell cycle and cytokinesis. Multiple alternatively spliced transcript variants have been observed at this gene. [provided by RefSeq, Aug 2016]	chr19:46601074-46610782
EIF5	protein-coding	EIF-5|EIF-5A	eukaryotic translation initiation factor 5	Eukaryotic translation initiation factor-5 (EIF5) interacts with the 40S initiation complex to promote hydrolysis of bound GTP with concomitant joining of the 60S ribosomal subunit to the 40S initiation complex. The resulting functional 80S ribosomal initiation complex is then active in peptidyl transfer and chain elongations (summary by Si et al., 1996 [PubMed 8663286]).[supplied by OMIM, May 20…	chr14:103334237-103345025	Cytosol (reliability']); Additional: Plasma membrane
PELO	PELO	0.0030769	0.010866	0.302312	685	1.7548
TAF12	-0.56859	protein-coding	TAF2J|TAFII20	TATA-box binding protein associated factor 12	Control of transcription by RNA polymerase II involves the basal transcription machinery which is a collection of proteins. These proteins with RNA polymerase II, assemble into complexes which are modulated by transactivator proteins that bind to cis-regulatory elements located adjacent to the transcription start site. Some modulators interact directly with the basal complex, whereas others may a…	chr1:28648707-28602850
RBM48	protein-coding	C7orf64|HSPC304	RNA binding motif protein 48		chr7:92528795-92540481	Nucleoplasm (reliability'])
SMPD4	protein-coding	NEDMABA|NEDMEBA|NET13|NSMASE-3|NSMASE3|SKNY	sphingomyelin phosphodiesterase 4	The protein encoded by this gene is a sphingomyelinase that catalyzes the hydrolysis of membrane sphingomyelin to form phosphorylcholine and ceramide. This gene is activated by DNA damage, cellular stress, and tumor necrosis factor, but it is downregulated by wild-type p53. The encoded protein localizes to the endoplasmic reticulum and Golgi network. [provided by RefSeq, Mar 2017]	chr2:130181757-130151392	Nuclear membrane (reliability']); Additional: Cytosol
MRPL46	protein-coding	C15orf4|LIECG2|P2ECSL	mitochondrial ribosomal protein L46	Mammalian mitochondrial ribosomal proteins are encoded by nuclear genes and help in protein synthesis within the mitochondrion. Mitochondrial ribosomes (mitoribosomes) consist of a small 28S subunit and a large 39S subunit. They have an estimated 75% protein to rRNA composition compared to prokaryotic ribosomes, where this ratio is reversed. Another difference between mammalian mitoribosomes and …	chr15:88467388-88459478	Mitochondria (reliability']); Additional: Cell Junctions;Nucleoplasm
CHEK1	protein-coding	CHK1	checkpoint kinase 1	The protein encoded by this gene belongs to the Ser/Thr protein kinase family. It is required for checkpoint mediated cell cycle arrest in response to DNA damage or the presence of unreplicated DNA. This protein acts to integrate signals from ATM and ATR, two cell cycle proteins involved in DNA damage responses, that also associate with chromatin in meiotic prophase I. Phosphorylation of CDC25A p…	chr11:125624910-125676256	Nucleoplasm (reliability']); Additional: Vesicles
OPA1	protein-coding	BERHS|MGM1|MTDPS14|NPG|NTG|largeG	OPA1 mitochondrial dynamin like GTPase	The protein encoded by this gene is a nuclear-encoded mitochondrial protein with similarity to dynamin-related GTPases. The encoded protein localizes to the inner mitochondrial membrane and helps regulate mitochondrial stability and energy output. This protein also sequesters cytochrome c. Mutations in this gene have been associated with optic atrophy type 1, which is a dominantly inherited optic…	chr3:193593149-193697811	Mitochondria;Nucleoplasm (reliability'])
TPX2	protein-coding	C20orf1|C20orf2|DIL-2|DIL2|FLS353|GD:C20orf1|HCA519|HCTP4|REPP86|p100	TPX2 microtubule nucleation factor		chr20:31739248-31801802	Nucleoplasm (reliability']); Additional: Cytokinetic bridge;Mitotic spindle
FAM98B	protein-coding		family with sequence similarity 98 member B		chr15:38454127-38487710	Nucleoplasm;Vesicles (reliability'])
GEMIN6	protein-coding		gem nuclear organelle associated protein 6	GEMIN6 is part of a large macromolecular complex, localized to both the cytoplasm and the nucleus, that plays a role in the cytoplasmic assembly of small nuclear ribonucleoproteins (snRNPs). Other members of this complex include SMN (MIM 600354), GEMIN2 (SIP1; MIM 602595), GEMIN3 (DDX20; MIM 606168), GEMIN4 (MIM 606969), and GEMIN5 (MIM 607005).[supplied by OMIM, Jul 2002]	chr2:38778210-38785002	Nuclear bodies;Nucleoplasm (reliability'])
NELFB	protein-coding	COBRA1|NELF-B	negative elongation factor complex member B	NELFB is a subunit of negative elongation factor (NELF), which also includes NELFA (WHSC2; MIM 606026), either NELFC or NELFD (TH1L; MIM 605297), and NELFE (RDBP; MIM 154040). NELF acts with DRB sensitivity-inducing factor (DSIF), a heterodimer of SPT4 (SUPT4H1; MIM 603555) and SPT5 (SUPT5H; MIM 602102), to cause transcriptional pausing of RNA polymerase II (see MIM 180660) (Narita et al., 2003 […	chr9:137255327-137273542	Nucleoplasm (reliability'])
WTAP	protein-coding	Mum2	WT1 associated protein	The Wilms tumor suppressor gene WT1 appears to play a role in both transcriptional and posttranscriptional regulation of certain cellular genes. This gene encodes a WT1-associating protein, which is a ubiquitously expressed nuclear protein. Like WT1 protein, this protein is localized throughout the nucleoplasm as well as in speckles and partially colocalizes with splicing factors. Alternative spl…	chr6:159726696-159756319	Nuclear speckles (reliability'])
PAF1	protein-coding	F23149_1|PD2	PAF1 homolog, Paf1/RNA polymerase II complex component	This gene encodes a subunit of the polymerase associated factor (PAF1) complex. The PAF1 complex interacts with RNA polymerase II and plays a role in transcription elongation as well as histone modifications including ubiquitylation and methylation. Alternatively spliced transcript variants encoding multiple isoforms have been observed for this gene. [provided by RefSeq, Feb 2012]	chr19:39391106-39385629	Nucleoplasm (reliability'])
THG1L	0.61888	protein-coding	ICF45|IHG-1|IHG1|SCAR28|THG1|hTHG1	tRNA-histidine guanylyltransferase 1 like	The protein encoded by this gene is a mitochondrial protein that is induced by high levels of glucose and is associated with diabetic nephropathy. The encoded protein appears to increase mitochondrial biogenesis, which could lead to renal fibrosis. Another function of this protein is that of a guanyltransferase, adding GMP to the 5' end of tRNA(His). Several transcript variants encoding different…	chr5:157731420-157741449
MIS18A	protein-coding	B28|C21orf45|C21orf46|FASP1|MIS18alpha|hMis18alpha	MIS18 kinetochore protein A		chr21:32283954-32154682	Cytosol;Nucleoplasm (reliability'])
MRPL52	protein-coding		mitochondrial ribosomal protein L52	Mammalian mitochondrial ribosomal proteins are encoded by nuclear genes and help in protein synthesis within the mitochondrion. Mitochondrial ribosomes (mitoribosomes) consist of a small 28S subunit and a large 39S subunit. They have an estimated 75% protein to rRNA composition compared to prokaryotic ribosomes, where this ratio is reversed. Another difference between mammalian mitoribosomes and …	chr14:22829862-22835037	Mitochondria (reliability']); Additional: Nucleoplasm
LSG1	protein-coding		large 60S subunit nuclear export GTPase 1	This gene encodes a protein related to the yeast large subunit GTPase 1. The encoded protein is necessary for cell viability and may localize in the endoplasmic reticulum, nucleus and cytoplasm.[provided by RefSeq, Feb 2009]	chr3:194672191-194640788	Cytosol;Nuclear bodies (reliability']); Additional: Nucleoplasm
CDC23	0.014527	protein-coding	ANAPC8|APC8|CUT23	cell division cycle 23	The protein encoded by this gene shares strong similarity with Saccharomyces cerevisiae Cdc23, a protein essential for cell cycle progression through the G2/M transition. This protein is a component of anaphase-promoting complex (APC), which is composed of eight protein subunits and highly conserved in eukaryotic cells. APC catalyzes the formation of cyclin B-ubiquitin conjugate that is responsib…	chr5:138213323-138187650
AHCYL1	protein-coding	DCAL|IRBIT|PPP1R78|PRO0233|XPVKONA	adenosylhomocysteinase like 1	The protein encoded by this gene interacts with inositol 1,4,5-trisphosphate receptor, type 1 and may be involved in the conversion of S-adenosyl-L-homocysteine to L-homocysteine and adenosine. Several transcript variants encoding two different isoforms have been found for this gene. [provided by RefSeq, Jun 2011]	chr1:109984765-110023742	Cytosol (reliability'])
SEC63	protein-coding	DNAJC23|ERdj2|PCLD2|PRO2507|SEC63L	SEC63 homolog, protein translocation regulator	The Sec61 complex is the central component of the protein translocation apparatus of the endoplasmic reticulum (ER) membrane. The protein encoded by this gene and SEC62 protein are found to be associated with ribosome-free SEC61 complex. It is speculated that Sec61-Sec62-Sec63 may perform post-translational protein translocation into the ER. The Sec61-Sec62-Sec63 complex might also perform the ba…	chr6:107958208-107867756	Endoplasmic reticulum (reliability'])
MRS2	0.10302	protein-coding	HPT|MRS2L	magnesium transporter MRS2		chr6:24402936-24426190
SLC2A1	protein-coding	CSE|DYT17|DYT18|DYT9|EIG12|GLUT|GLUT-1|GLUT1|GLUT1DS|HTLVR|PED|SDCHCN	solute carrier family 2 member 1	This gene encodes a major glucose transporter in the mammalian blood-brain barrier. The encoded protein is found primarily in the cell membrane and on the cell surface, where it can also function as a receptor for human T-cell leukemia virus (HTLV) I and II. Mutations in this gene have been found in a family with paroxysmal exertion-induced dyskinesia. [provided by RefSeq, Apr 2013]	chr1:42958868-42925353	Plasma membrane (reliability'])
SPG7	-0.19677	protein-coding	CAR|CMAR|PGN|SPG5C	SPG7 matrix AAA peptidase subunit, paraplegin	This gene encodes a mitochondrial metalloprotease protein that is a member of the AAA family. Members of this protein family share an ATPase domain and have roles in diverse cellular processes including membrane trafficking, intracellular motility, organelle biogenesis, protein folding, and proteolysis. Mutations in this gene cause autosomal recessive spastic paraplegia 7. Two transcript variants…	chr16:89508379-89557768
TMEM43	-0.16636	protein-coding	ARVC5|ARVD5|EDMD7|LUMA	transmembrane protein 43	This gene belongs to the TMEM43 family. Defects in this gene are the cause of familial arrhythmogenic right ventricular dysplasia type 5 (ARVD5), also known as arrhythmogenic right ventricular cardiomyopathy type 5 (ARVC5). Arrhythmogenic right ventricular dysplasia is an inherited disorder, often involving both ventricles, and is characterized by ventricular tachycardia, heart failure, sudden ca…	chr3:14125006-14143680
TAF10	protein-coding	TAF2A|TAF2H|TAFII30	TATA-box binding protein associated factor 10	Initiation of transcription by RNA polymerase II requires the activities of more than 70 polypeptides. The protein that coordinates these activities is transcription factor IID (TFIID), which binds to the core promoter to position the polymerase properly, serves as the scaffold for assembly of the remainder of the transcription complex, and acts as a channel for regulatory signals. TFIID is compo…	chr11:6612216-6606294	Nucleoplasm (reliability'])
CDC40	protein-coding	EHB3|PRP17|PRPF17	cell division cycle 40	Pre-mRNA splicing occurs in two sequential transesterification steps. The protein encoded by this gene is found to be essential for the catalytic step II in pre-mRNA splicing process. It is found in the spliceosome, and contains seven WD repeats, which function in protein-protein interactions. This protein has a sequence similarity to yeast Prp17 protein, which functions in two different cellular…	chr6:110180427-110232232	Nucleoplasm (reliability'])
ZZZ3	protein-coding	ATAC1	zinc finger ZZ-type containing 3		chr1:77683440-77561526	Nucleoli;Nucleoplasm (reliability'])
GSPT1	protein-coding	551G9.2|ETF3A|GST1|eRF3a	G1 to S phase transition 1		chr16:11916654-11868128	Cytosol (reliability']); Additional: Vesicles
BLM	protein-coding	BS|MGRISCE1|RECQ2|RECQL2|RECQL3	BLM RecQ like helicase	The Bloom syndrome is an autosomal recessive disorder characterized by growth deficiency, microcephaly and immunodeficiency among others. It is caused by homozygous or compound heterozygous mutation in the gene encoding DNA helicase RecQ protein on chromosome 15q26. This Bloom-associated helicase unwinds a variety of DNA substrates including Holliday junction, and is involved in several pathways …	chr15:90717346-90816166	Cytosol;Nucleoplasm (reliability'])
HSPE1	HSPE1	0.2018	0.34748	1	5904	-0.50382
RPL11	protein-coding	DBA7|GIG34|L11|uL5	ribosomal protein L11	Ribosomes, the organelles that catalyze protein synthesis, consist of a small 40S subunit and a large 60S subunit. Together these subunits are composed of 4 RNA species and approximately 80 structurally distinct proteins. This gene encodes a ribosomal protein that is a component of the 60S subunit. The protein belongs to the L5P family of ribosomal proteins. It is located in the cytoplasm. The pr…	chr1:23691779-23696835	Vesicles (reliability'])
PLEKHF2	0.017453	protein-coding	EAPF|PHAFIN2|ZFYVE18	pleckstrin homology and FYVE domain containing 2		chr8:95133785-95156685
YIPF3	protein-coding	C6orf109|FinGER3|KLIP1|dJ337H4.3	Yip1 domain family member 3		chr6:43516926-43511832	Golgi apparatus (reliability']); Additional: Nucleoplasm
NFIC	protein-coding	CTF|CTF5|NF-I|NFI	nuclear factor I C	The protein encoded by this gene belongs to the CTF/NF-I family. These are dimeric DNA-binding proteins, and function as cellular transcription factors and as replication factors for adenovirus DNA replication. Alternatively spliced transcript variants encoding different isoforms have been described for this gene. [provided by RefSeq, Oct 2011]	chr19:3359630-3469217	Nucleoli fibrillar center;Nucleoplasm (reliability'])
TBP	protein-coding	GTF2D|GTF2D1|HDL4|SCA17|TFIID	TATA-box binding protein	Initiation of transcription by RNA polymerase II requires the activities of more than 70 polypeptides. The protein that coordinates these activities is transcription factor IID (TFIID), which binds to the core promoter to position the polymerase properly, serves as the scaffold for assembly of the remainder of the transcription complex, and acts as a channel for regulatory signals. TFIID is compo…	chr6:170554369-170572859	Nucleoplasm (reliability'])

## Sheet: ORF2p negative regulators
Gene	Type of Gene	Synonyms	Function	Gene Summary	Gene Location	Subcellular Location (Protein Atlas)
UROD	protein-coding	PCT|UPD	uroporphyrinogen decarboxylase	This gene encodes an enzyme in the heme biosynthetic pathway. This enzyme is responsible for catalyzing the conversion of uroporphyrinogen to coproporphyrinogen through the removal of four carboxymethyl side chains. Mutations and deficiency in this enzyme are known to cause familial porphyria cutanea tarda and hepatoerythropoetic porphyria.[provided by RefSeq, Aug 2010]	chr1:45012254-45015575	Cytosol;Nucleoplasm (reliability'])
JADE2	protein-coding	JADE-2|PHF15	jade family PHD finger 2		chr5:134524153-134583228	Nucleoplasm (reliability'])
PITX2	protein-coding	ARP1|ASGD4|Brx1|IDG2|IGDS|IGDS2|IHG2|IRID2|Otlx2|PTX2|RGS|RIEG|RIEG1|RS	paired like homeodomain 2	This gene encodes a member of the RIEG/PITX homeobox family, which is in the bicoid class of homeodomain proteins. The encoded protein acts as a transcription factor and regulates procollagen lysyl hydroxylase gene expression. This protein plays a role in the terminal differentiation of somatotroph and lactotroph cell phenotypes, is involved in the development of the eye, tooth and abdominal orga…	chr4:110642123-110617423	Nucleoplasm (reliability'])
ARF5	0.071509	protein-coding		ADP ribosylation factor 5	This gene is a member of the human ADP-ribosylation factor (ARF) gene family. These genes encode small guanine nucleotide-binding proteins that stimulate the ADP-ribosyltransferase activity of cholera toxin and play a role in vesicular trafficking and as activators of phospholipase D. The gene products include 6 ARF proteins and 11 ARF-like proteins and constitute 1 family of the RAS superfamily.…	chr7:127588411-127591700
TMEM87B	protein-coding		transmembrane protein 87B	This gene encodes a protein that may interact with human papillomavirus type 18 E6 oncogene. The protein is also likely to be involved in endosome-to-trans-Golgi network retrograde transport. The gene is expressed in adult and fetal tissues, including brain and heart. This gene is a component of the 2q13 deletion syndrome. Mutations in this gene may be associated with congenital heart defects. [p…	chr2:112055266-112119314	Golgi apparatus;Vesicles (reliability'])
SH3BP2	protein-coding	3BP-2|3BP2|CRBM|CRPM|RES4-23	SH3 domain binding protein 2	The protein encoded by this gene has an N-terminal pleckstrin homology (PH) domain, an SH3-binding proline-rich region, and a C-terminal SH2 domain. The protein binds to the SH3 domains of several proteins including the ABL1 and SYK protein tyrosine kinases , and functions as a cytoplasmic adaptor protein to positively regulate transcriptional activity in T, natural killer (NK), and basophilic ce…	chr4:2793085-2841096	Actin filaments;Nucleoplasm (reliability'])
ZNF57	protein-coding	ZNF424	zinc finger protein 57		chr19:2900928-2918646	Nucleoli (reliability'])
DENND2D	protein-coding		DENN domain containing 2D		chr1:111204791-111185969	Cytosol;Nucleoplasm (reliability'])
MNAT1	protein-coding	CAP35|MAT1|RNF66|TFB3	MNAT1 component of CDK activating kinase	The protein encoded by this gene, along with cyclin H and CDK7, forms the CDK-activating kinase (CAK) enzymatic complex. This complex activates several cyclin-associated kinases and can also associate with TFIIH to activate transcription by RNA polymerase II. Two transcript variants encoding different isoforms have been found for this gene. [provided by RefSeq, Sep 2011]	chr14:60734735-60969965	Nucleoplasm (reliability'])
GPR89B	protein-coding	GPHR|GPR89|GPR89C|SH120|UNQ192	G protein-coupled receptor 89B		chr1:147928420-147993592	Endoplasmic reticulum (reliability'])
PSME1	protein-coding	HEL-S-129m|IFI5111|PA28A|PA28alpha|REGalpha	proteasome activator subunit 1	The 26S proteasome is a multicatalytic proteinase complex with a highly ordered structure composed of 2 complexes, a 20S core and a 19S regulator. The 20S core is composed of 4 rings of 28 non-identical subunits; 2 rings are composed of 7 alpha subunits and 2 rings are composed of 7 beta subunits. The 19S regulator is composed of a base, which contains 6 ATPase subunits and 2 non-ATPase subunits,…	chr14:24136194-24138962	Cytosol (reliability']); Additional: Nuclear bodies
TAF9	protein-coding	MGC:5067|STAF31/32|TAF2G|TAFII-31|TAFII-32|TAFII31|TAFII32|TAFIID32	TATA-box binding protein associated factor 9	Initiation of transcription by RNA polymerase II requires the activities of more than 70 polypeptides. The protein that coordinates these activities is transcription factor IID (TFIID), which binds to the core promoter to position the polymerase properly, serves as the scaffold for assembly of the remainder of the transcription complex, and acts as a channel for regulatory signals. TFIID is compo…	chr5:69369824-69364743	Nucleoplasm (reliability'])
TMEM109	protein-coding		transmembrane protein 109		chr11:60914158-60923443	Cytosol;Nuclear membrane (reliability'])
UBE2L6	protein-coding	RIG-B|UBCH8	ubiquitin conjugating enzyme E2 L6	The modification of proteins with ubiquitin is an important cellular mechanism for targeting abnormal or short-lived proteins for degradation. Ubiquitination involves at least three classes of enzymes: ubiquitin-activating enzymes (E1s), ubiquitin-conjugating enzymes (E2s) and ubiquitin-protein ligases (E3s). This gene encodes a member of the E2 ubiquitin-conjugating enzyme family. This enzyme is…	chr11:57567935-57551662	Cytosol (reliability'])
UBE3A	protein-coding	ANCR|AS|E6-AP|EPVE6AP|HPVE6A	ubiquitin protein ligase E3A	This gene encodes an E3 ubiquitin-protein ligase, part of the ubiquitin protein degradation system. This imprinted gene is maternally expressed in brain and biallelically expressed in other tissues. Maternally inherited deletion of this gene causes Angelman Syndrome, characterized by severe motor and intellectual retardation, ataxia, hypotonia, epilepsy, absence of speech, and characteristic faci…	chr15:25439381-25333728	Nucleoplasm (reliability']); Additional: Cytosol

## Sheet: Lethal in ORF2p WT
Gene	Type of Gene	Synonyms	Function	Gene Summary	Gene Location	Subcellular Location (Protein Atlas)
ZNF343	protein-coding	dJ734P14.5	zinc finger protein 343		chr20:2524522-2481817	Nucleoplasm (reliability'])
NPHP1	protein-coding	JBTS4|NPH1|SLSN1	nephrocystin 1	This gene encodes a protein with src homology domain 3 (SH3) patterns. This protein interacts with Crk-associated substrate, and it appears to function in the control of cell division, as well as in cell-cell and cell-matrix adhesion signaling, likely as part of a multifunctional complex localized in actin- and microtubule-based structures. Mutations in this gene cause familial juvenile nephronop…	chr2:110205013-110123348	Vesicles (reliability'])
OAZ1	protein-coding	AZ1|AZI|OAZ	ornithine decarboxylase antizyme 1	The protein encoded by this gene belongs to the ornithine decarboxylase antizyme family, which plays a role in cell growth and proliferation by regulating intracellular polyamine levels. Expression of antizymes requires +1 ribosomal frameshifting, which is enhanced by high levels of polyamines. Antizymes in turn bind to and inhibit ornithine decarboxylase (ODC), the key enzyme in polyamine biosyn…	chr19:2269486-2273488	Vesicles (reliability']); Additional: Centriolar satellite
NDUFA10	protein-coding	CI-42KD|CI-42k|MC1DN22	NADH:ubiquinone oxidoreductase subunit A10	The protein encoded by this gene is a component of 42 kDa complex I, the first enzyme complex in the electron transport chain of mitochondria. This protein has NADH dehydrogenase activity and oxidoreductase activity. It transfers electrons from NADH to the respiratory chain. A mutation in this gene was found in an individual with Leigh syndrome. [provided by RefSeq, Apr 2016]	chr2:240025343-239892442	Mitochondria (reliability'])
RAD17	protein-coding	CCYC|HRAD17|R24L|RAD17SP|RAD24	RAD17 checkpoint clamp loader component	The protein encoded by this gene is highly similar to the gene product of Schizosaccharomyces pombe rad17, a cell cycle checkpoint gene required for cell cycle arrest and DNA damage repair in response to DNA damage. This protein shares strong similarity with DNA replication factor C (RFC), and can form a complex with RFCs. This protein binds to chromatin prior to DNA damage and is phosphorylated …	chr5:69369293-69414801	Nucleoplasm (reliability'])
TRIM8	protein-coding	GERP|RNF27	tripartite motif containing 8	This gene encodes a member of the tripartite motif (TRIM) protein family. Based on similarities to other proteins, the encoded protein is suspected to be an E3 ubiquitin-protein ligase. Regulation of this gene may be altered in some cancers. Mutations resulting in a truncated protein product have been observed in early-onset epileptic encephalopathy (EOEE). [provided by RefSeq, Sep 2016]	chr10:102644479-102658319	Nucleoplasm (reliability']); Additional: Cytosol;Vesicles
CCDC25	protein-coding		coiled-coil domain containing 25		chr8:27772640-27733316	Golgi apparatus;Nucleoplasm (reliability']); Additional: Cytosol
GGNBP2	protein-coding	DIF-3|DIF3|LCRG1|LZK1|ZFP403|ZNF403	gametogenetin binding protein 2		chr17:36544913-36589848	Endoplasmic reticulum (reliability'])
PSMD10	protein-coding	dJ889N15.2|p28	proteasome 26S subunit, non-ATPase 10	This gene encodes a subunit of the PA700/19S complex, which is the regulatory component of the 26S proteasome. The 26S proteosome complex is required for ubiquitin-dependent protein degradation. This protein is a non-ATPase subunit that may be involved in protein-protein interactions. Aberrant expression of this gene may paly a role in tumorigenesis. Two transcripts encoding different isoforms ha…	chrX:108091542-108084207	Cytosol (reliability']); Additional: Intermediate filaments
PBK	protein-coding	CT84|HEL164|Nori-3|SPK|TOPK	PDZ binding kinase	This gene encodes a serine/threonine protein kinase related to the dual specific mitogen-activated protein kinase kinase (MAPKK) family. Evidence suggests that mitotic phosphorylation is required for its catalytic activity. The encoded protein may be involved in the activation of lymphoid cells and support testicular functions, with a suggested role in the process of spermatogenesis. Overexpressi…	chr8:27837817-27809624	Cytosol (reliability'])
FAM24B	0.084311	protein-coding		family with sequence similarity 24 member B		chr10:122879641-122849078
ITPA	protein-coding	C20orf37|HLC14-06-P|ITPase|My049|NTPase|dJ794I6.3	inosine triphosphatase	This gene encodes an inosine triphosphate pyrophosphohydrolase. The encoded protein hydrolyzes inosine triphosphate and deoxyinosine triphosphate to the monophosphate nucleotide and diphosphate. This protein, which is a member of the HAM1 NTPase protein family, is found in the cytoplasm and acts as a homodimer. Defects in the encoded protein can result in inosine triphosphate pyrophosphorylase de…	chr20:3208676-3227449	Cytosol (reliability']); Additional: Nuclear bodies;Nucleoplasm
CLK1	protein-coding	CLK|CLK/STY|STY	CDC like kinase 1	This gene encodes a member of the CDC2-like (or LAMMER) family of dual specificity protein kinases. In the nucleus, the encoded protein phosphorylates serine/arginine-rich proteins involved in pre-mRNA processing, releasing them into the nucleoplasm. The choice of splice sites during pre-mRNA processing may be regulated by the concentration of transacting factors, including serine/arginine rich p…	chr2:200864658-200853009	Nuclear membrane;Nucleoplasm (reliability'])
PDF	protein-coding		peptide deformylase, mitochondrial	Protein synthesis proceeds after formylation of methionine by methionyl-tRNA formyl transferase (FMT) and transfer of the charged initiator f-met tRNA to the ribosome. In eubacteria and eukaryotic organelles the product of this gene, peptide deformylase (PDF), removes the formyl group from the initiating methionine of nascent peptides. In eubacteria, deformylation of nascent peptides is required …	chr16:69330588-69326913	Mitochondria (reliability']); Additional: Nucleoplasm
SPAG9	protein-coding	CT89|HLC-6|HLC4|HLC6|JIP-4|JIP4|JLP|PHET|PIG6	sperm associated antigen 9	This gene encodes a member of the cancer testis antigen gene family. The encoded protein functions as a scaffold protein that structurally organizes mitogen-activated protein kinases and mediates c-Jun-terminal kinase signaling. This protein also binds to kinesin-1 and may be involved in microtubule-based membrane transport. This protein may play a role in tumor growth and development. Alternate …	chr17:51120868-50962174	Centriolar satellite;Cytosol (reliability'])
KIF1C	-0.035269	protein-coding	LTXS1|SATX2|SAX2|SPAX2|SPG58	kinesin family member 1C	The protein encoded by this gene is a member of the kinesin-like protein family. The family members are microtubule-dependent molecular motors that transport organelles within cells and move chromosomes during cell division. Mutations in this gene are a cause of spastic ataxia 2, autosomal recessive. [provided by RefSeq, May 2014]	chr17:4997950-5028401
NDUFA6	0.77231	protein-coding	B14|CI-B14|LYRM6|MC1DN33|NADHB14	NADH:ubiquinone oxidoreductase subunit A6	This gene encodes a member of the LYR family of proteins that contain a highly conserved tripeptide (LYR) motif near the N-terminus. The encoded protein is an accessory subunit of NADH: ubiquinone oxidorerductase (Complex I), which is the largest enzyme of the mitochondrial membrane respiratory chain. Complex I functions in electron transfer from NADH to the respiratory chain. [provided by RefSeq…	chr22:42090772-42085526
QRICH1	protein-coding	AB-DIP|VERBRAS	glutamine rich 1		chr3:49094373-49029707	Nucleoplasm (reliability'])
WDR44	protein-coding	RAB11BP|RPH11|SYM-4	WD repeat domain 44	This gene encodes a protein that interacts with the small GTPase rab11. A similar protein in rat binds the GTP-containing active form of rab11. This protein may play a role in endosome recycling. Alternate splicing results in multiple transcript variants.[provided by RefSeq, May 2010]	chrX:118346073-118449966	Golgi apparatus (reliability'])
SPOPL	protein-coding	BTBD33	speckle type BTB/POZ protein like		chr2:138501770-138573547	Vesicles (reliability'])
CNOT11	protein-coding	C2orf29|C40	CCR4-NOT transcription complex subunit 11		chr2:101252886-101270316	Nucleoplasm (reliability'])
APEH	protein-coding	AARE|ACPH|APH|D3F15S2|D3S48E|DNF15S2|OPH	acylaminoacyl-peptide hydrolase	This gene encodes the enzyme acylpeptide hydrolase, which catalyzes the hydrolysis of the terminal acetylated amino acid preferentially from small acetylated peptides. The acetyl amino acid formed by this hydrolase is further processed to acetate and a free amino acid by an aminoacylase. This gene is located within the same region of chromosome 3 (3p21) as the aminoacylase gene, and deletions at …	chr3:49673102-49683971	Cytosol (reliability'])
ARHGAP42	protein-coding	AD031|GRAF3|TMEM133	Rho GTPase activating protein 42	This gene encodes a Rho GTPase-activating protein (RhoGAP), and member of the GRAF or BAR-PH family of proteins. Expression of this gene is enriched in vascular smooth muscle cells and the encoded protein inhibits RhoA activity to regulate vascular tone and control blood pressure. A mutation in the first intron of this gene modulates its expression and is associated with reduced blood pressure in…	chr11:100687288-100993941	Nuclear speckles (reliability']); Additional: Cytosol
ARID4B	protein-coding	BCAA|BRCAA1|RBBP1L1|RBP1L1|SAP180	AT-rich interaction domain 4B	This gene encodes a protein with sequence similarity to retinoblastoma-binding protein-1. The encoded protein is a subunit of the histone deacetylase-dependant SIN3A transcriptional corepressor complex, which functions in diverse cellular processes including proliferation, differentiation, apoptosis, oncogenesis, and cell fate determination. The gene product is recognized by IgG antibody isolated…	chr1:235328224-235166895	Nucleoplasm (reliability']); Additional: Vesicles
BIRC2	protein-coding	API1|HIAP2|Hiap-2|MIHB|RNF48|c-IAP1|cIAP1	baculoviral IAP repeat containing 2	The protein encoded by this gene is a member of a family of proteins that inhibits apoptosis by binding to tumor necrosis factor receptor-associated factors TRAF1 and TRAF2, probably by interfering with activation of ICE-like proteases. This encoded protein inhibits apoptosis induced by serum deprivation and menadione, a potent inducer of free radicals. Alternatively spliced transcript variants e…	chr11:102347182-102378670	Cytosol;Nucleoli fibrillar center (reliability']); Additional: Nucleoplasm
CCNT2	protein-coding	CYCT2	cyclin T2	The protein encoded by this gene belongs to the highly conserved cyclin family, whose members are characterized by a dramatic periodicity in protein abundance through the cell cycle. Cyclins function as regulators of CDK kinases. Different cyclins exhibit distinct expression and degradation patterns which contribute to the temporal coordination of each mitotic event. This cyclin and its kinase pa…	chr2:134918810-134959342	Cytosol;Nucleoplasm;Plasma membrane (reliability'])
COMMD4	protein-coding		COMM domain containing 4		chr15:75336035-75343227	Nucleoplasm (reliability']); Additional: Plasma membrane
DERL1	protein-coding	DER-1|DER1|derlin-1	derlin 1	The protein encoded by this gene is a member of the derlin family. Members of this family participate in the ER-associated degradation response and retrotranslocate misfolded or unfolded proteins from the ER lumen to the cytosol for proteasomal degradation. This protein recognizes substrate in the ER and works in a complex to retrotranslocate it across the ER membrane into the cytosol. This prote…	chr8:123042302-123013170	Endoplasmic reticulum (reliability'])
DRG1	protein-coding	NEDD3	developmentally regulated GTP binding protein 1		chr22:31399604-31434452	Cytosol;Nuclear bodies (reliability'])
EAPP	protein-coding	BM036|C14orf11	E2F associated phosphoprotein	This gene encodes a phosphoprotein that interacts with several members of the E2F family of proteins. The protein localizes to the nucleus, and is present throughout the cell cycle except during mitosis. It functions to modulate E2F-regulated transcription and stimulate proliferation. Alternative splicing results in multiple transcript variants. [provided by RefSeq, Jan 2016]	chr14:34539721-34515938	Golgi apparatus (reliability']); Additional: Cytosol;Nucleoplasm
GADD45A	protein-coding	DDIT1|GADD45	growth arrest and DNA damage inducible alpha	This gene is a member of a group of genes whose transcript levels are increased following stressful growth arrest conditions and treatment with DNA-damaging agents. The protein encoded by this gene responds to environmental stresses by mediating activation of the p38/JNK pathway via MTK1/MEKK4 kinase. The DNA damage-induced transcription of this gene is mediated by both p53-dependent and -indepen…	chr1:67685201-67688334	Nuclear speckles (reliability'])
KIF14	protein-coding	MCPH20|MKS12	kinesin family member 14	This gene encodes a member of the kinesin-3 superfamily of microtubule motor proteins. These proteins are involved in numerous processes including vesicle transport, chromosome segregation, mitotic spindle formation, and cytokinesis. In human HeLa-S3 and 293T cells, this protein is localized to the cytoplasm during interphase, to the spindle poles and spindle microtubules during mitosis, and to t…	chr1:200620791-200551497	Cytosol (reliability']); Additional: Midbody ring
KLF6	protein-coding	BCD1|CBA1|COPEB|CPBP|GBF|PAC1|ST12|ZF9	Kruppel like factor 6	This gene encodes a member of the Kruppel-like family of transcription factors. The zinc finger protein is a transcriptional activator, and functions as a tumor suppressor. Multiple transcript variants encoding different isoforms have been found for this gene, some of which are implicated in carcinogenesis. [provided by RefSeq, May 2009]	chr10:3785209-3775996	Nucleoli fibrillar center;Nucleoplasm (reliability']); Additional: Cytosol;Vesicles
KMT2A	protein-coding	ALL-1|CXXC7|HRX|HTRX1|MLL|MLL1|MLL1A|TRX1|WDSTS	lysine methyltransferase 2A	This gene encodes a transcriptional coactivator that plays an essential role in regulating gene expression during early development and hematopoiesis. The encoded protein contains multiple conserved functional domains. One of these domains, the SET domain, is responsible for its histone H3 lysine 4 (H3K4) methyltransferase activity which mediates chromatin modifications associated with epigenetic…	chr11:118436492-118526832	Nucleoplasm (reliability']); Additional: Cytosol
MARK2	protein-coding	EMK-1|EMK1|PAR-1|Par-1b|Par1b	microtubule affinity regulating kinase 2	This gene encodes a member of the Par-1 family of serine/threonine protein kinases. The protein is an important regulator of cell polarity in epithelial and neuronal cells, and also controls the stability of microtubules through phosphorylation and inactivation of several microtubule-associating proteins. The protein localizes to cell membranes. Multiple transcript variants encoding different iso…	chr11:63838955-63911020	Plasma membrane (reliability']); Additional: Nucleoplasm
METTL15	protein-coding	METT5D1	methyltransferase like 15		chr11:28108251-28527041	Golgi apparatus;Plasma membrane (reliability']); Additional: Actin filaments
MGAT5	-0.24677	protein-coding	GNT-V|GNT-VA|MGAT5A	alpha-1,6-mannosylglycoprotein 6-beta-N-acetylglucosaminyltransferase	The protein encoded by this gene belongs to the glycosyltransferase family. It catalyzes the addition of beta-1,6-N-acetylglucosamine to the alpha-linked mannose of biantennary N-linked oligosaccharides present on the newly synthesized glycoproteins. It is one of the most important enzymes involved in the regulation of the biosynthesis of glycoprotein oligosaccharides. Alterations of the oligosac…	chr2:134119922-134454621
MYNN	protein-coding	OSZF|SBBIZ1|ZBTB31|ZNF902	myoneurin	This gene encodes a member of the BTB/POZ and zinc finger domain-containing protein family that are involved in the control of gene expression. Alternative splicing results in multiple transcript variants and a pseudogene has been identified on chromosome 14. [provided by RefSeq, Jun 2010]	chr3:169773396-169789716	Nucleoplasm (reliability'])
NDUFAF6	0.313	protein-coding	C8orf38|FRTS5|MC1DN17	NADH:ubiquinone oxidoreductase complex assembly factor 6	This gene encodes a protein that localizes to mitochondria and contains a predicted phytoene synthase domain. The encoded protein plays an important role in the assembly of complex I (NADH-ubiquinone oxidoreductase) of the mitochondrial respiratory chain through regulation of subunit ND1 biogenesis. Mutations in this gene are associated with complex I enzymatic deficiency. [provided by RefSeq, No…	chr8:94895799-95118496
PIGC	0.048998	protein-coding	GPI2|GPIBD16|MRT62	phosphatidylinositol glycan anchor biosynthesis class C	This gene encodes an endoplasmic reticulum associated protein that is involved in glycosylphosphatidylinositol (GPI) lipid anchor biosynthesis. The GPI lipid anchor is a glycolipid found on many blood cells and serves to anchor proteins to the cell surface. The encoded protein is one subunit of the GPI N-acetylglucosaminyl (GlcNAc) transferase that transfers GlcNAc to phosphatidylinositol (PI) on…	chr1:172444069-172441457
PIK3R4	protein-coding	VPS15|p150	phosphoinositide-3-kinase regulatory subunit 4		chr3:130746829-130678934	Vesicles (reliability']); Additional: Microtubules
PLXNA1	protein-coding	NOV|NOVP|PLEXIN-A1|PLXN1	plexin A1		chr3:126983259-127037392	Nucleoplasm (reliability']); Additional: Cytosol
PTGES2	protein-coding	C9orf15|GBF-1|GBF1|PGES2|mPGES-2	prostaglandin E synthase 2	The protein encoded by this gene is a membrane-associated prostaglandin E synthase, which catalyzes the conversion of prostaglandin H2 to prostaglandin E2. This protein also has been shown to activate the transcription regulated by a gamma-interferon-activated transcription element (GATE). Multiple transcript variants have been found for this gene. [provided by RefSeq, Jun 2009]	chr9:128128440-128120693	Mitochondria (reliability'])
RAB1A	protein-coding	RAB1|YPT1	RAB1A, member RAS oncogene family	This gene encodes a member of the Ras superfamily of GTPases. Members of the gene family cycle between inactive GDP-bound and active GTP-bound forms. This small GTPase controls vesicle traffic from the endoplasmic reticulum to the Golgi apparatus. Multiple alternatively spliced transcript variants have been identified for this gene which encode different protein isoforms. [provided by RefSeq, Oct…	chr2:65130132-65086854	Cytosol;Endoplasmic reticulum (reliability'])
RPS6KB1	protein-coding	PS6K|S6K|S6K-beta-1|S6K1|STK14A|p70-S6K|p70-alpha	ribosomal protein S6 kinase B1	This gene encodes a member of the ribosomal S6 kinase family of serine/threonine kinases. The encoded protein responds to mTOR (mammalian target of rapamycin) signaling to promote protein synthesis, cell growth, and cell proliferation. Activity of this gene has been associated with human cancer. Alternatively spliced transcript variants have been observed. The use of alternative translation start…	chr17:59893121-59950574	Nucleoplasm (reliability'])
SLC35A5	protein-coding		solute carrier family 35 member A5	This gene encodes a transmembrane protein which belongs to subfamily 35A of the solute carrier superfamily. The encoded protein is a nucleoside-sugar transporter. Alternative splicing results in multiple transcript variants. [provided by RefSeq, Feb 2017]	chr3:112561320-112585579	Golgi apparatus (reliability'])
SLTM	protein-coding	Met	SAFB like transcription modulator		chr15:58934313-58879050	Nuclear bodies;Nucleoplasm (reliability'])
SNTB2	-0.00038455	protein-coding	D16S2531E|EST25263|SNT2B2|SNT3|SNTL	syntrophin beta 2	Dystrophin is a large, rod-like cytoskeletal protein found at the inner surface of muscle fibers. Dystrophin is missing in Duchenne Muscular Dystrophy patients and is present in reduced amounts in Becker Muscular Dystrophy patients. The protein encoded by this gene is a peripheral membrane protein found associated with dystrophin and dystrophin-related proteins. This gene is a member of the syntr…	chr16:69187147-69309052
SP1	protein-coding		Sp1 transcription factor	The protein encoded by this gene is a zinc finger transcription factor that binds to GC-rich motifs of many promoters. The encoded protein is involved in many cellular processes, including cell differentiation, cell growth, apoptosis, immune responses, response to DNA damage, and chromatin remodeling. Post-translational modifications such as phosphorylation, acetylation, glycosylation, and proteo…	chr12:53380176-53416446	Nucleoplasm (reliability'])
SPTSSA	0.084209	protein-coding	C14orf147|SSSPTA	serine palmitoyltransferase small subunit A	Serine palmitoyltransferase (SPT; EC 2.3.1.50) catalyzes the first committed and rate-limiting step in sphingolipid biosynthesis. SSSPTA is a small SPT subunit that stimulates SPT activity and confers acyl-CoA preference to the SPT catalytic heterodimer of SPTLC1 (MIM 605712) and either SPTLC2 (MIM 605713) or SPTLC3 (MIM 611120) (Han et al., 2009 [PubMed 19416851]).[supplied by OMIM, Nov 2010]	chr14:34462240-34432788
TMEM147	protein-coding	NIFIE14	transmembrane protein 147		chr19:35545626-35547526	Actin filaments;Golgi apparatus (reliability'])
TMOD3	protein-coding	UTMOD	tropomodulin 3		chr15:51829653-51915725	Cytosol (reliability']); Additional: Actin filaments
TTC13	protein-coding		tetratricopeptide repeat domain 13		chr1:230978872-230906243	Nucleoplasm (reliability'])
VAT1	0.45475	protein-coding	VATI	vesicle amine transport 1	Synaptic vesicles are responsible for regulating the storage and release of neurotransmitters in the nerve terminal. The protein encoded by this gene is an abundant integral membrane protein of cholinergic synaptic vesicles and is thought to be involved in vesicular transport. It belongs to the quinone oxidoreductase subfamily of zinc-containing alcohol dehydrogenase proteins. [provided by RefSeq…	chr17:43022385-43014607
WDFY1	-0.25525	protein-coding	FENS-1|FENS1|WDF1|ZFYVE17	WD repeat and FYVE domain containing 1	The protein encoded by this gene is a phosphatidylinositol 3-phosphate binding protein, which contains a FYVE zinc finger domain and multiple WD-40 repeat domains. When exogenously expressed, it localizes to early endosomes. Mutagenesis analysis demonstrates that this endosomal localization is mediated by the FYVE domain. [provided by RefSeq, Jan 2015]	chr2:223945335-223875348
ZNF282	protein-coding	HUB1	zinc finger protein 282		chr7:149195495-149226243	Nucleoplasm (reliability']); Additional: Cytosol
ZNF76	protein-coding	D6S229E|ZNF523|Zfp523	zinc finger protein 76		chr6:35259473-35295985	Nucleoplasm (reliability']); Additional: Cytosol
