# Supplementary material for: Identification of Novel Regulators of LINE-1 Expression via CRISPR/Cas9 Screening
Source: Research Square preprint supplement (doi:10.21203/rs.3.rs-6726282/v1), 2025-06-04
Supplement: Supplementary file 3 [file 9b502bc2f6f5ec66369f1415.xlsx]

## Sheet: Sample key
ID	Samples	Sample collection day post library infection	Replicate
WH1	WT sorted ORF2p up	Day 14	Replicate 1
WL1	WT unsorted	Day 14	Replicate 1
WH2	WT sorted ORF2p up	Day 14	Replicate 2
WL2	WT unsorted	Day 14	Replicate 2
MH1	MT sorted ORF2p up	Day 14	Replicate 1
ML1	MT unsorted	Day 14	Replicate 1
MH2	MT sorted ORF2p up	Day 14	Replicate 2
ML2	MT unsorted	Day 14	Replicate 2
PWM	Pooled sorted ORF2p up from WT and MT cells	Day 14	Replicate 1&2
WT: L1 dual reporter expressing WT ORF2p
MT: L1 dual reporter expressing EN/RT mutant version of ORF2p

## Sheet: Raw data
sgRNA	sequence	WH1	WL1	WH2	WL2	MH1	ML1	MH2	ML2	PWM	Entrez Gene ID	Gene Symbol (original)	Group Name (original)	sgRNA Label (updated 5/6/20)	Gene Symbol (updated)	Library Insert Sequence (5'-ACCG-guide-tracrRNA_HEAT-T6-3')
1|Neg_Control_Human_0001|NegCtrl	GTAGCGAACGTGTCCGGCGT	0	0	0	0	0	0	0	0	0	n/a	NegCtrl	NegCtrl|01	1|Neg_Control_Human_0001|NegCtrl	NegCtrl	ACCGGTAGCGAACGTGTCCGGCGTGTTTAAGAGCTATGCTGGAAACAGCATAGCAAGTTTAAATAAGGCTAGTCCGTTATCAACTTGAAAAAGTGGCACCGAGTCGGTGCTTTTTT
1|Neg_Control_Human_0002|NegCtrl	GACCGGAACGATCTCGCGTA	10	1	0	1	1	0	0	0	41151	n/a	NegCtrl	NegCtrl|01	1|Neg_Control_Human_0002|NegCtrl	NegCtrl	ACCGGACCGGAACGATCTCGCGTAGTTTAAGAGCTATGCTGGAAACAGCATAGCAAGTTTAAATAAGGCTAGTCCGTTATCAACTTGAAAAAGTGGCACCGAGTCGGTGCTTTTTT
1|Neg_Control_Human_0003|NegCtrl	GGCAGTCGTTCGGTTGATAT	56	25	49	7	6	10	11	14	365089	n/a	NegCtrl	NegCtrl|01	1|Neg_Control_Human_0003|NegCtrl	NegCtrl	ACCGGGCAGTCGTTCGGTTGATATGTTTAAGAGCTATGCTGGAAACAGCATAGCAAGTTTAAATAAGGCTAGTCCGTTATCAACTTGAAAAAGTGGCACCGAGTCGGTGCTTTTTT
1|Neg_Control_Human_0004|NegCtrl	GCTTGAGCACATACGCGAAT	0	0	0	0	0	0	0	0	0	n/a	NegCtrl	NegCtrl|01	1|Neg_Control_Human_0004|NegCtrl	NegCtrl	ACCGGCTTGAGCACATACGCGAATGTTTAAGAGCTATGCTGGAAACAGCATAGCAAGTTTAAATAAGGCTAGTCCGTTATCAACTTGAAAAAGTGGCACCGAGTCGGTGCTTTTTT
1|Neg_Control_Human_0005|NegCtrl	GTGGTAGAATAACGTATTAC	1	0	0	0	0	0	0	0	0	n/a	NegCtrl	NegCtrl|01	1|Neg_Control_Human_0005|NegCtrl	NegCtrl	ACCGGTGGTAGAATAACGTATTACGTTTAAGAGCTATGCTGGAAACAGCATAGCAAGTTTAAATAAGGCTAGTCCGTTATCAACTTGAAAAAGTGGCACCGAGTCGGTGCTTTTTT
1|Neg_Control_Human_0006|NegCtrl	GTCATACATGGATAAGGCTA	0	0	0	0	0	0	0	0	0	n/a	NegCtrl	NegCtrl|01	1|Neg_Control_Human_0006|NegCtrl	NegCtrl	ACCGGTCATACATGGATAAGGCTAGTTTAAGAGCTATGCTGGAAACAGCATAGCAAGTTTAAATAAGGCTAGTCCGTTATCAACTTGAAAAAGTGGCACCGAGTCGGTGCTTTTTT
1|Neg_Control_Human_0007|NegCtrl	GATACACGAAGCATCACTAG	0	0	0	0	0	0	0	0	0	n/a	NegCtrl	NegCtrl|01	1|Neg_Control_Human_0007|NegCtrl	NegCtrl	ACCGGATACACGAAGCATCACTAGGTTTAAGAGCTATGCTGGAAACAGCATAGCAAGTTTAAATAAGGCTAGTCCGTTATCAACTTGAAAAAGTGGCACCGAGTCGGTGCTTTTTT
1|Neg_Control_Human_0008|NegCtrl	GAACGTTGGCACTACTTCAC	0	0	0	0	0	0	0	0	0	n/a	NegCtrl	NegCtrl|01	1|Neg_Control_Human_0008|NegCtrl	NegCtrl	ACCGGAACGTTGGCACTACTTCACGTTTAAGAGCTATGCTGGAAACAGCATAGCAAGTTTAAATAAGGCTAGTCCGTTATCAACTTGAAAAAGTGGCACCGAGTCGGTGCTTTTTT
1|Neg_Control_Human_0009|NegCtrl	GATCCATGTAATGCGTTCGA	0	0	0	0	0	0	0	0	0	n/a	NegCtrl	NegCtrl|01	1|Neg_Control_Human_0009|NegCtrl	NegCtrl	ACCGGATCCATGTAATGCGTTCGAGTTTAAGAGCTATGCTGGAAACAGCATAGCAAGTTTAAATAAGGCTAGTCCGTTATCAACTTGAAAAAGTGGCACCGAGTCGGTGCTTTTTT
1|Neg_Control_Human_0010|NegCtrl	GTCGTGAAGTGCATTCGATC	1	0	0	1	33112	0	0	1	4155	n/a	NegCtrl	NegCtrl|01	1|Neg_Control_Human_0010|NegCtrl	NegCtrl	ACCGGTCGTGAAGTGCATTCGATCGTTTAAGAGCTATGCTGGAAACAGCATAGCAAGTTTAAATAAGGCTAGTCCGTTATCAACTTGAAAAAGTGGCACCGAGTCGGTGCTTTTTT
1|Neg_Control_Human_0011|NegCtrl	GTTCGACTCGCGTGACCGTA	8	5	0	0	1	1	0	1	65914	n/a	NegCtrl	NegCtrl|02	1|Neg_Control_Human_0011|NegCtrl	NegCtrl	ACCGGTTCGACTCGCGTGACCGTAGTTTAAGAGCTATGCTGGAAACAGCATAGCAAGTTTAAATAAGGCTAGTCCGTTATCAACTTGAAAAAGTGGCACCGAGTCGGTGCTTTTTT
1|Neg_Control_Human_0012|NegCtrl	GAATCTACCGCAGCGGTTCG	2	0	1	0	0	0	0	1	14699	n/a	NegCtrl	NegCtrl|02	1|Neg_Control_Human_0012|NegCtrl	NegCtrl	ACCGGAATCTACCGCAGCGGTTCGGTTTAAGAGCTATGCTGGAAACAGCATAGCAAGTTTAAATAAGGCTAGTCCGTTATCAACTTGAAAAAGTGGCACCGAGTCGGTGCTTTTTT
1|Neg_Control_Human_0013|NegCtrl	GAAGTGACGTCGATTCGATA	0	0	0	0	0	0	0	0	0	n/a	NegCtrl	NegCtrl|02	1|Neg_Control_Human_0013|NegCtrl	NegCtrl	ACCGGAAGTGACGTCGATTCGATAGTTTAAGAGCTATGCTGGAAACAGCATAGCAAGTTTAAATAAGGCTAGTCCGTTATCAACTTGAAAAAGTGGCACCGAGTCGGTGCTTTTTT
1|Neg_Control_Human_0014|NegCtrl	GCGGTGTATGACAACCGCCG	0	0	0	0	0	0	0	0	0	n/a	NegCtrl	NegCtrl|02	1|Neg_Control_Human_0014|NegCtrl	NegCtrl	ACCGGCGGTGTATGACAACCGCCGGTTTAAGAGCTATGCTGGAAACAGCATAGCAAGTTTAAATAAGGCTAGTCCGTTATCAACTTGAAAAAGTGGCACCGAGTCGGTGCTTTTTT
1|Neg_Control_Human_0015|NegCtrl	GTACCGCGCCTGAAGTTCGC	1	1	0	0	0	0	0	0	12078	n/a	NegCtrl	NegCtrl|02	1|Neg_Control_Human_0015|NegCtrl	NegCtrl	ACCGGTACCGCGCCTGAAGTTCGCGTTTAAGAGCTATGCTGGAAACAGCATAGCAAGTTTAAATAAGGCTAGTCCGTTATCAACTTGAAAAAGTGGCACCGAGTCGGTGCTTTTTT
1|Neg_Control_Human_0016|NegCtrl	GCAGCTCGTGTGTCGTACTC	0	0	0	0	0	0	0	0	0	n/a	NegCtrl	NegCtrl|02	1|Neg_Control_Human_0016|NegCtrl	NegCtrl	ACCGGCAGCTCGTGTGTCGTACTCGTTTAAGAGCTATGCTGGAAACAGCATAGCAAGTTTAAATAAGGCTAGTCCGTTATCAACTTGAAAAAGTGGCACCGAGTCGGTGCTTTTTT
1|Neg_Control_Human_0017|NegCtrl	GCGCCTTAAGAGTACTCATC	0	0	0	0	0	0	0	0	0	n/a	NegCtrl	NegCtrl|02	1|Neg_Control_Human_0017|NegCtrl	NegCtrl	ACCGGCGCCTTAAGAGTACTCATCGTTTAAGAGCTATGCTGGAAACAGCATAGCAAGTTTAAATAAGGCTAGTCCGTTATCAACTTGAAAAAGTGGCACCGAGTCGGTGCTTTTTT
1|Neg_Control_Human_0018|NegCtrl	GAGTGTCGTCGTTGCTCCTA	0	0	0	0	0	0	0	0	1	n/a	NegCtrl	NegCtrl|02	1|Neg_Control_Human_0018|NegCtrl	NegCtrl	ACCGGAGTGTCGTCGTTGCTCCTAGTTTAAGAGCTATGCTGGAAACAGCATAGCAAGTTTAAATAAGGCTAGTCCGTTATCAACTTGAAAAAGTGGCACCGAGTCGGTGCTTTTTT
1|Neg_Control_Human_0019|NegCtrl	GCAGCTCGACCTCAAGCCGT	8	2	0	0	0	2	1	0	41287	n/a	NegCtrl	NegCtrl|02	1|Neg_Control_Human_0019|NegCtrl	NegCtrl	ACCGGCAGCTCGACCTCAAGCCGTGTTTAAGAGCTATGCTGGAAACAGCATAGCAAGTTTAAATAAGGCTAGTCCGTTATCAACTTGAAAAAGTGGCACCGAGTCGGTGCTTTTTT
1|Neg_Control_Human_0020|NegCtrl	GTATCCTGACCTACGCGCTG	0	0	0	0	0	0	0	0	0	n/a	NegCtrl	NegCtrl|02	1|Neg_Control_Human_0020|NegCtrl	NegCtrl	ACCGGTATCCTGACCTACGCGCTGGTTTAAGAGCTATGCTGGAAACAGCATAGCAAGTTTAAATAAGGCTAGTCCGTTATCAACTTGAAAAAGTGGCACCGAGTCGGTGCTTTTTT
1|Neg_Control_Human_0021|NegCtrl	GTGTATCTCAGCACGCTAAC	0	0	0	0	0	0	0	0	0	n/a	NegCtrl	NegCtrl|03	1|Neg_Control_Human_0021|NegCtrl	NegCtrl	ACCGGTGTATCTCAGCACGCTAACGTTTAAGAGCTATGCTGGAAACAGCATAGCAAGTTTAAATAAGGCTAGTCCGTTATCAACTTGAAAAAGTGGCACCGAGTCGGTGCTTTTTT
1|Neg_Control_Human_0022|NegCtrl	GTCGTCATACAACGGCAACG	1	1	0	0	0	1	0	0	12275	n/a	NegCtrl	NegCtrl|03	1|Neg_Control_Human_0022|NegCtrl	NegCtrl	ACCGGTCGTCATACAACGGCAACGGTTTAAGAGCTATGCTGGAAACAGCATAGCAAGTTTAAATAAGGCTAGTCCGTTATCAACTTGAAAAAGTGGCACCGAGTCGGTGCTTTTTT
1|Neg_Control_Human_0023|NegCtrl	GTCGTGCGCTTCCGGCGGTA	3	2	0	0	0	0	1	0	19868	n/a	NegCtrl	NegCtrl|03	1|Neg_Control_Human_0023|NegCtrl	NegCtrl	ACCGGTCGTGCGCTTCCGGCGGTAGTTTAAGAGCTATGCTGGAAACAGCATAGCAAGTTTAAATAAGGCTAGTCCGTTATCAACTTGAAAAAGTGGCACCGAGTCGGTGCTTTTTT
1|Neg_Control_Human_0024|NegCtrl	GCGGTCCTCAGTAAGCGCGT	2	2	0	0	2	0	0	1	11109	n/a	NegCtrl	NegCtrl|03	1|Neg_Control_Human_0024|NegCtrl	NegCtrl	ACCGGCGGTCCTCAGTAAGCGCGTGTTTAAGAGCTATGCTGGAAACAGCATAGCAAGTTTAAATAAGGCTAGTCCGTTATCAACTTGAAAAAGTGGCACCGAGTCGGTGCTTTTTT
1|Neg_Control_Human_0025|NegCtrl	GCTCTGCTGCGGAAGGATTC	0	0	0	0	0	0	0	0	0	n/a	NegCtrl	NegCtrl|03	1|Neg_Control_Human_0025|NegCtrl	NegCtrl	ACCGGCTCTGCTGCGGAAGGATTCGTTTAAGAGCTATGCTGGAAACAGCATAGCAAGTTTAAATAAGGCTAGTCCGTTATCAACTTGAAAAAGTGGCACCGAGTCGGTGCTTTTTT
1|Neg_Control_Human_0026|NegCtrl	GCATGGAGGAGCGTCGCAGA	13	7	1	2	1	3	0	37006	56706	n/a	NegCtrl	NegCtrl|03	1|Neg_Control_Human_0026|NegCtrl	NegCtrl	ACCGGCATGGAGGAGCGTCGCAGAGTTTAAGAGCTATGCTGGAAACAGCATAGCAAGTTTAAATAAGGCTAGTCCGTTATCAACTTGAAAAAGTGGCACCGAGTCGGTGCTTTTTT
1|Neg_Control_Human_0027|NegCtrl	GTAGCGCGCGTAGGAGTGGC	0	3	0	0	0	0	0	0	16666	n/a	NegCtrl	NegCtrl|03	1|Neg_Control_Human_0027|NegCtrl	NegCtrl	ACCGGTAGCGCGCGTAGGAGTGGCGTTTAAGAGCTATGCTGGAAACAGCATAGCAAGTTTAAATAAGGCTAGTCCGTTATCAACTTGAAAAAGTGGCACCGAGTCGGTGCTTTTTT
1|Neg_Control_Human_0028|NegCtrl	GATCACCTGCATTCGTACAC	147	52	14	14	18	13	6	17	947432	n/a	NegCtrl	NegCtrl|03	1|Neg_Control_Human_0028|NegCtrl	NegCtrl	ACCGGATCACCTGCATTCGTACACGTTTAAGAGCTATGCTGGAAACAGCATAGCAAGTTTAAATAAGGCTAGTCCGTTATCAACTTGAAAAAGTGGCACCGAGTCGGTGCTTTTTT
1|Neg_Control_Human_0029|NegCtrl	GCACACCTAGATATCGAATG	0	0	0	0	0	0	0	0	0	n/a	NegCtrl	NegCtrl|03	1|Neg_Control_Human_0029|NegCtrl	NegCtrl	ACCGGCACACCTAGATATCGAATGGTTTAAGAGCTATGCTGGAAACAGCATAGCAAGTTTAAATAAGGCTAGTCCGTTATCAACTTGAAAAAGTGGCACCGAGTCGGTGCTTTTTT
1|Neg_Control_Human_0030|NegCtrl	GTTGATCAACGCGCTTCGCG	7	1	1	0	0	0	2	0	46191	n/a	NegCtrl	NegCtrl|03	1|Neg_Control_Human_0030|NegCtrl	NegCtrl	ACCGGTTGATCAACGCGCTTCGCGGTTTAAGAGCTATGCTGGAAACAGCATAGCAAGTTTAAATAAGGCTAGTCCGTTATCAACTTGAAAAAGTGGCACCGAGTCGGTGCTTTTTT
1|Neg_Control_Human_0031|NegCtrl	GCGTCTCACTCACTCCATCG	0	0	0	0	0	0	0	0	0	n/a	NegCtrl	NegCtrl|04	1|Neg_Control_Human_0031|NegCtrl	NegCtrl	ACCGGCGTCTCACTCACTCCATCGGTTTAAGAGCTATGCTGGAAACAGCATAGCAAGTTTAAATAAGGCTAGTCCGTTATCAACTTGAAAAAGTGGCACCGAGTCGGTGCTTTTTT
1|Neg_Control_Human_0032|NegCtrl	GCCGACCAACGTCAGCGGTA	0	0	0	0	0	0	0	0	2	n/a	NegCtrl	NegCtrl|04	1|Neg_Control_Human_0032|NegCtrl	NegCtrl	ACCGGCCGACCAACGTCAGCGGTAGTTTAAGAGCTATGCTGGAAACAGCATAGCAAGTTTAAATAAGGCTAGTCCGTTATCAACTTGAAAAAGTGGCACCGAGTCGGTGCTTTTTT
1|Neg_Control_Human_0033|NegCtrl	GGATACGGTGCGTCAATCTA	17	4	0	2	1	1	2	1	102405	n/a	NegCtrl	NegCtrl|04	1|Neg_Control_Human_0033|NegCtrl	NegCtrl	ACCGGGATACGGTGCGTCAATCTAGTTTAAGAGCTATGCTGGAAACAGCATAGCAAGTTTAAATAAGGCTAGTCCGTTATCAACTTGAAAAAGTGGCACCGAGTCGGTGCTTTTTT
1|Neg_Control_Human_0034|NegCtrl	GAATCCAGTGGCGGCGACAA	6	2	0	0	0	0	0	1	23626	n/a	NegCtrl	NegCtrl|04	1|Neg_Control_Human_0034|NegCtrl	NegCtrl	ACCGGAATCCAGTGGCGGCGACAAGTTTAAGAGCTATGCTGGAAACAGCATAGCAAGTTTAAATAAGGCTAGTCCGTTATCAACTTGAAAAAGTGGCACCGAGTCGGTGCTTTTTT
1|Neg_Control_Human_0035|NegCtrl	GCACTGTCAGTGCAACGATA	0	1	0	14418	2	0	10	0	0	n/a	NegCtrl	NegCtrl|04	1|Neg_Control_Human_0035|NegCtrl	NegCtrl	ACCGGCACTGTCAGTGCAACGATAGTTTAAGAGCTATGCTGGAAACAGCATAGCAAGTTTAAATAAGGCTAGTCCGTTATCAACTTGAAAAAGTGGCACCGAGTCGGTGCTTTTTT
1|Neg_Control_Human_0036|NegCtrl	GCGATCCTCAAGTATGCTCA	0	44229	2	2	2	3	0	1	6	n/a	NegCtrl	NegCtrl|04	1|Neg_Control_Human_0036|NegCtrl	NegCtrl	ACCGGCGATCCTCAAGTATGCTCAGTTTAAGAGCTATGCTGGAAACAGCATAGCAAGTTTAAATAAGGCTAGTCCGTTATCAACTTGAAAAAGTGGCACCGAGTCGGTGCTTTTTT
1|Neg_Control_Human_0037|NegCtrl	GCTAATATCGACACGGCCGC	0	0	0	0	0	0	0	0	0	n/a	NegCtrl	NegCtrl|04	1|Neg_Control_Human_0037|NegCtrl	NegCtrl	ACCGGCTAATATCGACACGGCCGCGTTTAAGAGCTATGCTGGAAACAGCATAGCAAGTTTAAATAAGGCTAGTCCGTTATCAACTTGAAAAAGTGGCACCGAGTCGGTGCTTTTTT
1|Neg_Control_Human_0038|NegCtrl	GGAGATGCATCGAAGTCGAT	0	0	0	0	0	0	0	0	0	n/a	NegCtrl	NegCtrl|04	1|Neg_Control_Human_0038|NegCtrl	NegCtrl	ACCGGGAGATGCATCGAAGTCGATGTTTAAGAGCTATGCTGGAAACAGCATAGCAAGTTTAAATAAGGCTAGTCCGTTATCAACTTGAAAAAGTGGCACCGAGTCGGTGCTTTTTT
1|Neg_Control_Human_0039|NegCtrl	GGATGCACTCCATCTCGTCT	0	0	0	0	0	0	0	0	2	n/a	NegCtrl	NegCtrl|04	1|Neg_Control_Human_0039|NegCtrl	NegCtrl	ACCGGGATGCACTCCATCTCGTCTGTTTAAGAGCTATGCTGGAAACAGCATAGCAAGTTTAAATAAGGCTAGTCCGTTATCAACTTGAAAAAGTGGCACCGAGTCGGTGCTTTTTT
1|Neg_Control_Human_0040|NegCtrl	GTGCCGAGTAATAACGCGAG	1	0	36992	0	2	1	0	0	1	n/a	NegCtrl	NegCtrl|04	1|Neg_Control_Human_0040|NegCtrl	NegCtrl	ACCGGTGCCGAGTAATAACGCGAGGTTTAAGAGCTATGCTGGAAACAGCATAGCAAGTTTAAATAAGGCTAGTCCGTTATCAACTTGAAAAAGTGGCACCGAGTCGGTGCTTTTTT
1|Neg_Control_Human_0041|NegCtrl	GAGATTCCGATGTAACGTAC	0	0	0	0	0	0	0	0	0	n/a	NegCtrl	NegCtrl|05	1|Neg_Control_Human_0041|NegCtrl	NegCtrl	ACCGGAGATTCCGATGTAACGTACGTTTAAGAGCTATGCTGGAAACAGCATAGCAAGTTTAAATAAGGCTAGTCCGTTATCAACTTGAAAAAGTGGCACCGAGTCGGTGCTTTTTT
1|Neg_Control_Human_0042|NegCtrl	GTCGTCACGAGCAGGATTGC	3	2	1	1	1	3	1	42400	13684	n/a	NegCtrl	NegCtrl|05	1|Neg_Control_Human_0042|NegCtrl	NegCtrl	ACCGGTCGTCACGAGCAGGATTGCGTTTAAGAGCTATGCTGGAAACAGCATAGCAAGTTTAAATAAGGCTAGTCCGTTATCAACTTGAAAAAGTGGCACCGAGTCGGTGCTTTTTT
1|Neg_Control_Human_0043|NegCtrl	GCGTTAGTCACTTAGCTCGA	0	0	0	0	1	0	0	0	0	n/a	NegCtrl	NegCtrl|05	1|Neg_Control_Human_0043|NegCtrl	NegCtrl	ACCGGCGTTAGTCACTTAGCTCGAGTTTAAGAGCTATGCTGGAAACAGCATAGCAAGTTTAAATAAGGCTAGTCCGTTATCAACTTGAAAAAGTGGCACCGAGTCGGTGCTTTTTT
1|Neg_Control_Human_0044|NegCtrl	GTTCACACGGTGTCGGATAG	0	0	0	0	0	0	0	0	0	n/a	NegCtrl	NegCtrl|05	1|Neg_Control_Human_0044|NegCtrl	NegCtrl	ACCGGTTCACACGGTGTCGGATAGGTTTAAGAGCTATGCTGGAAACAGCATAGCAAGTTTAAATAAGGCTAGTCCGTTATCAACTTGAAAAAGTGGCACCGAGTCGGTGCTTTTTT
1|Neg_Control_Human_0045|NegCtrl	GGATAGGTGACCTTAGTACG	0	0	0	0	0	0	1	0	8	n/a	NegCtrl	NegCtrl|05	1|Neg_Control_Human_0045|NegCtrl	NegCtrl	ACCGGGATAGGTGACCTTAGTACGGTTTAAGAGCTATGCTGGAAACAGCATAGCAAGTTTAAATAAGGCTAGTCCGTTATCAACTTGAAAAAGTGGCACCGAGTCGGTGCTTTTTT
1|Neg_Control_Human_0046|NegCtrl	GTATGAGTCAAGCTAATGCG	7	5	1	0	0	0	1	1	47761	n/a	NegCtrl	NegCtrl|05	1|Neg_Control_Human_0046|NegCtrl	NegCtrl	ACCGGTATGAGTCAAGCTAATGCGGTTTAAGAGCTATGCTGGAAACAGCATAGCAAGTTTAAATAAGGCTAGTCCGTTATCAACTTGAAAAAGTGGCACCGAGTCGGTGCTTTTTT
1|Neg_Control_Human_0047|NegCtrl	GCAACTATTGGAATACGTGA	0	0	0	0	0	0	0	0	0	n/a	NegCtrl	NegCtrl|05	1|Neg_Control_Human_0047|NegCtrl	NegCtrl	ACCGGCAACTATTGGAATACGTGAGTTTAAGAGCTATGCTGGAAACAGCATAGCAAGTTTAAATAAGGCTAGTCCGTTATCAACTTGAAAAAGTGGCACCGAGTCGGTGCTTTTTT
1|Neg_Control_Human_0048|NegCtrl	GTTACCTTCGCTCGTCTATA	0	0	0	0	0	0	0	0	0	n/a	NegCtrl	NegCtrl|05	1|Neg_Control_Human_0048|NegCtrl	NegCtrl	ACCGGTTACCTTCGCTCGTCTATAGTTTAAGAGCTATGCTGGAAACAGCATAGCAAGTTTAAATAAGGCTAGTCCGTTATCAACTTGAAAAAGTGGCACCGAGTCGGTGCTTTTTT
1|Neg_Control_Human_0049|NegCtrl	GTACCGAGCACCACAGGCCG	0	24680	0	1	0	2	0	0	4	n/a	NegCtrl	NegCtrl|05	1|Neg_Control_Human_0049|NegCtrl	NegCtrl	ACCGGTACCGAGCACCACAGGCCGGTTTAAGAGCTATGCTGGAAACAGCATAGCAAGTTTAAATAAGGCTAGTCCGTTATCAACTTGAAAAAGTGGCACCGAGTCGGTGCTTTTTT
1|Neg_Control_Human_0050|NegCtrl	GTCAGCCATCGGATAGAGAT	0	0	0	0	0	0	0	0	0	n/a	NegCtrl	NegCtrl|05	1|Neg_Control_Human_0050|NegCtrl	NegCtrl	ACCGGTCAGCCATCGGATAGAGATGTTTAAGAGCTATGCTGGAAACAGCATAGCAAGTTTAAATAAGGCTAGTCCGTTATCAACTTGAAAAAGTGGCACCGAGTCGGTGCTTTTTT
1|Neg_Control_Human_0051|NegCtrl	GTACGGCACTCCTAGCCGCT	0	0	0	0	0	0	0	0	0	n/a	NegCtrl	NegCtrl|06	1|Neg_Control_Human_0051|NegCtrl	NegCtrl	ACCGGTACGGCACTCCTAGCCGCTGTTTAAGAGCTATGCTGGAAACAGCATAGCAAGTTTAAATAAGGCTAGTCCGTTATCAACTTGAAAAAGTGGCACCGAGTCGGTGCTTTTTT
1|Neg_Control_Human_0052|NegCtrl	GGTCCTGTCGTATGCTTGCA	4	3	0	0	2	0	0	0	24226	n/a	NegCtrl	NegCtrl|06	1|Neg_Control_Human_0052|NegCtrl	NegCtrl	ACCGGGTCCTGTCGTATGCTTGCAGTTTAAGAGCTATGCTGGAAACAGCATAGCAAGTTTAAATAAGGCTAGTCCGTTATCAACTTGAAAAAGTGGCACCGAGTCGGTGCTTTTTT
1|Neg_Control_Human_0053|NegCtrl	GCCGCAATATATGCGGTAAG	3	5	11838	1	6	0	2	2	47856	n/a	NegCtrl	NegCtrl|06	1|Neg_Control_Human_0053|NegCtrl	NegCtrl	ACCGGCCGCAATATATGCGGTAAGGTTTAAGAGCTATGCTGGAAACAGCATAGCAAGTTTAAATAAGGCTAGTCCGTTATCAACTTGAAAAAGTGGCACCGAGTCGGTGCTTTTTT
1|Neg_Control_Human_0054|NegCtrl	GCGCACGTATAATCCTGCGT	3	0	0	0	0	0	0	1	16266	n/a	NegCtrl	NegCtrl|06	1|Neg_Control_Human_0054|NegCtrl	NegCtrl	ACCGGCGCACGTATAATCCTGCGTGTTTAAGAGCTATGCTGGAAACAGCATAGCAAGTTTAAATAAGGCTAGTCCGTTATCAACTTGAAAAAGTGGCACCGAGTCGGTGCTTTTTT
1|Neg_Control_Human_0055|NegCtrl	GTGCACAACACGATCCACGA	7	3	0	1	0	0	0	0	25421	n/a	NegCtrl	NegCtrl|06	1|Neg_Control_Human_0055|NegCtrl	NegCtrl	ACCGGTGCACAACACGATCCACGAGTTTAAGAGCTATGCTGGAAACAGCATAGCAAGTTTAAATAAGGCTAGTCCGTTATCAACTTGAAAAAGTGGCACCGAGTCGGTGCTTTTTT
1|Neg_Control_Human_0056|NegCtrl	GCACAATGTTGACGTAAGTG	0	0	0	0	0	0	0	0	1	n/a	NegCtrl	NegCtrl|06	1|Neg_Control_Human_0056|NegCtrl	NegCtrl	ACCGGCACAATGTTGACGTAAGTGGTTTAAGAGCTATGCTGGAAACAGCATAGCAAGTTTAAATAAGGCTAGTCCGTTATCAACTTGAAAAAGTGGCACCGAGTCGGTGCTTTTTT
1|Neg_Control_Human_0057|NegCtrl	GTAAGATGCTGCTCACCGTG	9	4	0	0	1	0	0	3	53341	n/a	NegCtrl	NegCtrl|06	1|Neg_Control_Human_0057|NegCtrl	NegCtrl	ACCGGTAAGATGCTGCTCACCGTGGTTTAAGAGCTATGCTGGAAACAGCATAGCAAGTTTAAATAAGGCTAGTCCGTTATCAACTTGAAAAAGTGGCACCGAGTCGGTGCTTTTTT
1|Neg_Control_Human_0058|NegCtrl	GTCGGTGATCCAACGTATCG	0	0	0	0	0	0	0	0	0	n/a	NegCtrl	NegCtrl|06	1|Neg_Control_Human_0058|NegCtrl	NegCtrl	ACCGGTCGGTGATCCAACGTATCGGTTTAAGAGCTATGCTGGAAACAGCATAGCAAGTTTAAATAAGGCTAGTCCGTTATCAACTTGAAAAAGTGGCACCGAGTCGGTGCTTTTTT
1|Neg_Control_Human_0059|NegCtrl	GAGCTAGTAGGACGCAAGAC	0	0	0	0	0	0	0	0	0	n/a	NegCtrl	NegCtrl|06	1|Neg_Control_Human_0059|NegCtrl	NegCtrl	ACCGGAGCTAGTAGGACGCAAGACGTTTAAGAGCTATGCTGGAAACAGCATAGCAAGTTTAAATAAGGCTAGTCCGTTATCAACTTGAAAAAGTGGCACCGAGTCGGTGCTTTTTT
1|Neg_Control_Human_0060|NegCtrl	GTACGTGGAAGCTTGTGGCC	0	0	0	0	0	0	0	0	0	n/a	NegCtrl	NegCtrl|06	1|Neg_Control_Human_0060|NegCtrl	NegCtrl	ACCGGTACGTGGAAGCTTGTGGCCGTTTAAGAGCTATGCTGGAAACAGCATAGCAAGTTTAAATAAGGCTAGTCCGTTATCAACTTGAAAAAGTGGCACCGAGTCGGTGCTTTTTT
1|Neg_Control_Human_0061|NegCtrl	GAGAACTGCCAGTTCTCGAT	0	0	0	0	0	0	0	0	0	n/a	NegCtrl	NegCtrl|07	1|Neg_Control_Human_0061|NegCtrl	NegCtrl	ACCGGAGAACTGCCAGTTCTCGATGTTTAAGAGCTATGCTGGAAACAGCATAGCAAGTTTAAATAAGGCTAGTCCGTTATCAACTTGAAAAAGTGGCACCGAGTCGGTGCTTTTTT
1|Neg_Control_Human_0062|NegCtrl	GCCATTCGGCGCGGCACTTC	5	3	0	0	0	1	0	0	34138	n/a	NegCtrl	NegCtrl|07	1|Neg_Control_Human_0062|NegCtrl	NegCtrl	ACCGGCCATTCGGCGCGGCACTTCGTTTAAGAGCTATGCTGGAAACAGCATAGCAAGTTTAAATAAGGCTAGTCCGTTATCAACTTGAAAAAGTGGCACCGAGTCGGTGCTTTTTT
1|Neg_Control_Human_0063|NegCtrl	GCACACGACCAATCCGCTTC	0	0	0	0	0	0	0	0	0	n/a	NegCtrl	NegCtrl|07	1|Neg_Control_Human_0063|NegCtrl	NegCtrl	ACCGGCACACGACCAATCCGCTTCGTTTAAGAGCTATGCTGGAAACAGCATAGCAAGTTTAAATAAGGCTAGTCCGTTATCAACTTGAAAAAGTGGCACCGAGTCGGTGCTTTTTT
1|Neg_Control_Human_0064|NegCtrl	GAGGTGATCGATTAAGTACA	0	0	0	0	0	0	0	0	0	n/a	NegCtrl	NegCtrl|07	1|Neg_Control_Human_0064|NegCtrl	NegCtrl	ACCGGAGGTGATCGATTAAGTACAGTTTAAGAGCTATGCTGGAAACAGCATAGCAAGTTTAAATAAGGCTAGTCCGTTATCAACTTGAAAAAGTGGCACCGAGTCGGTGCTTTTTT
1|Neg_Control_Human_0065|NegCtrl	GTCACTCGCAGACGCCTAAC	1	2	0	0	0	33295	0	3	0	n/a	NegCtrl	NegCtrl|07	1|Neg_Control_Human_0065|NegCtrl	NegCtrl	ACCGGTCACTCGCAGACGCCTAACGTTTAAGAGCTATGCTGGAAACAGCATAGCAAGTTTAAATAAGGCTAGTCCGTTATCAACTTGAAAAAGTGGCACCGAGTCGGTGCTTTTTT
1|Neg_Control_Human_0066|NegCtrl	GCGCTACGGAATCATACGTT	0	0	1	0	0	0	0	9599	1	n/a	NegCtrl	NegCtrl|07	1|Neg_Control_Human_0066|NegCtrl	NegCtrl	ACCGGCGCTACGGAATCATACGTTGTTTAAGAGCTATGCTGGAAACAGCATAGCAAGTTTAAATAAGGCTAGTCCGTTATCAACTTGAAAAAGTGGCACCGAGTCGGTGCTTTTTT
1|Neg_Control_Human_0067|NegCtrl	GGTAGGACCTCACGGCGCGC	0	0	0	0	0	0	0	0	0	n/a	NegCtrl	NegCtrl|07	1|Neg_Control_Human_0067|NegCtrl	NegCtrl	ACCGGGTAGGACCTCACGGCGCGCGTTTAAGAGCTATGCTGGAAACAGCATAGCAAGTTTAAATAAGGCTAGTCCGTTATCAACTTGAAAAAGTGGCACCGAGTCGGTGCTTTTTT
1|Neg_Control_Human_0068|NegCtrl	GAACTGCATCTTGTTGTAGT	1	0	0	0	1	0	0	0	18805	n/a	NegCtrl	NegCtrl|07	1|Neg_Control_Human_0068|NegCtrl	NegCtrl	ACCGGAACTGCATCTTGTTGTAGTGTTTAAGAGCTATGCTGGAAACAGCATAGCAAGTTTAAATAAGGCTAGTCCGTTATCAACTTGAAAAAGTGGCACCGAGTCGGTGCTTTTTT
1|Neg_Control_Human_0069|NegCtrl	GATCCTGATCCGGCGGCGCG	0	0	0	0	0	0	0	0	0	n/a	NegCtrl	NegCtrl|07	1|Neg_Control_Human_0069|NegCtrl	NegCtrl	ACCGGATCCTGATCCGGCGGCGCGGTTTAAGAGCTATGCTGGAAACAGCATAGCAAGTTTAAATAAGGCTAGTCCGTTATCAACTTGAAAAAGTGGCACCGAGTCGGTGCTTTTTT
1|Neg_Control_Human_0070|NegCtrl	GGTATGCGCGATCCTGAGTT	111393	5	2	3	2	1	1	14	27717	n/a	NegCtrl	NegCtrl|07	1|Neg_Control_Human_0070|NegCtrl	NegCtrl	ACCGGGTATGCGCGATCCTGAGTTGTTTAAGAGCTATGCTGGAAACAGCATAGCAAGTTTAAATAAGGCTAGTCCGTTATCAACTTGAAAAAGTGGCACCGAGTCGGTGCTTTTTT
1|Neg_Control_Human_0071|NegCtrl	GCGGAGCTAGAGAGCGGTCA	0	0	0	0	0	0	0	0	2	n/a	NegCtrl	NegCtrl|08	1|Neg_Control_Human_0071|NegCtrl	NegCtrl	ACCGGCGGAGCTAGAGAGCGGTCAGTTTAAGAGCTATGCTGGAAACAGCATAGCAAGTTTAAATAAGGCTAGTCCGTTATCAACTTGAAAAAGTGGCACCGAGTCGGTGCTTTTTT
1|Neg_Control_Human_0072|NegCtrl	GAATGGCAATTACGGCTGAT	0	0	0	0	0	0	0	0	1	n/a	NegCtrl	NegCtrl|08	1|Neg_Control_Human_0072|NegCtrl	NegCtrl	ACCGGAATGGCAATTACGGCTGATGTTTAAGAGCTATGCTGGAAACAGCATAGCAAGTTTAAATAAGGCTAGTCCGTTATCAACTTGAAAAAGTGGCACCGAGTCGGTGCTTTTTT
1|Neg_Control_Human_0073|NegCtrl	GTATGGTGAGTAGTCGCTTG	0	0	0	0	0	0	0	0	0	n/a	NegCtrl	NegCtrl|08	1|Neg_Control_Human_0073|NegCtrl	NegCtrl	ACCGGTATGGTGAGTAGTCGCTTGGTTTAAGAGCTATGCTGGAAACAGCATAGCAAGTTTAAATAAGGCTAGTCCGTTATCAACTTGAAAAAGTGGCACCGAGTCGGTGCTTTTTT
1|Neg_Control_Human_0074|NegCtrl	GTGTAATTGCGTCTAGTCGG	0	0	0	0	0	0	0	0	0	n/a	NegCtrl	NegCtrl|08	1|Neg_Control_Human_0074|NegCtrl	NegCtrl	ACCGGTGTAATTGCGTCTAGTCGGGTTTAAGAGCTATGCTGGAAACAGCATAGCAAGTTTAAATAAGGCTAGTCCGTTATCAACTTGAAAAAGTGGCACCGAGTCGGTGCTTTTTT
1|Neg_Control_Human_0075|NegCtrl	GGTCCTGGCGAGGAGCCTTG	0	0	0	0	0	0	0	0	0	n/a	NegCtrl	NegCtrl|08	1|Neg_Control_Human_0075|NegCtrl	NegCtrl	ACCGGGTCCTGGCGAGGAGCCTTGGTTTAAGAGCTATGCTGGAAACAGCATAGCAAGTTTAAATAAGGCTAGTCCGTTATCAACTTGAAAAAGTGGCACCGAGTCGGTGCTTTTTT
1|Neg_Control_Human_0076|NegCtrl	GAAGATAAGTCGCTGTCTCG	9	3	0	0	1	0	0	3	37227	n/a	NegCtrl	NegCtrl|08	1|Neg_Control_Human_0076|NegCtrl	NegCtrl	ACCGGAAGATAAGTCGCTGTCTCGGTTTAAGAGCTATGCTGGAAACAGCATAGCAAGTTTAAATAAGGCTAGTCCGTTATCAACTTGAAAAAGTGGCACCGAGTCGGTGCTTTTTT
1|Neg_Control_Human_0077|NegCtrl	GTCGGCGTTCTGTTGTGACT	1	66110	1	1	1	5	1	2	14	n/a	NegCtrl	NegCtrl|08	1|Neg_Control_Human_0077|NegCtrl	NegCtrl	ACCGGTCGGCGTTCTGTTGTGACTGTTTAAGAGCTATGCTGGAAACAGCATAGCAAGTTTAAATAAGGCTAGTCCGTTATCAACTTGAAAAAGTGGCACCGAGTCGGTGCTTTTTT
1|Neg_Control_Human_0078|NegCtrl	GAGGCAAGCCGTTAGGTGTA	0	0	0	0	0	0	0	0	0	n/a	NegCtrl	NegCtrl|08	1|Neg_Control_Human_0078|NegCtrl	NegCtrl	ACCGGAGGCAAGCCGTTAGGTGTAGTTTAAGAGCTATGCTGGAAACAGCATAGCAAGTTTAAATAAGGCTAGTCCGTTATCAACTTGAAAAAGTGGCACCGAGTCGGTGCTTTTTT
1|Neg_Control_Human_0079|NegCtrl	GCGGATCCAGATCTCATTCG	0	0	0	0	0	0	0	0	0	n/a	NegCtrl	NegCtrl|08	1|Neg_Control_Human_0079|NegCtrl	NegCtrl	ACCGGCGGATCCAGATCTCATTCGGTTTAAGAGCTATGCTGGAAACAGCATAGCAAGTTTAAATAAGGCTAGTCCGTTATCAACTTGAAAAAGTGGCACCGAGTCGGTGCTTTTTT
1|Neg_Control_Human_0080|NegCtrl	GGAACATAGGAGCACGTAGT	0	0	0	0	0	0	0	0	0	n/a	NegCtrl	NegCtrl|08	1|Neg_Control_Human_0080|NegCtrl	NegCtrl	ACCGGGAACATAGGAGCACGTAGTGTTTAAGAGCTATGCTGGAAACAGCATAGCAAGTTTAAATAAGGCTAGTCCGTTATCAACTTGAAAAAGTGGCACCGAGTCGGTGCTTTTTT
1|Neg_Control_Human_0081|NegCtrl	GTCATCATTATGGCGTAAGG	0	0	0	0	0	0	0	0	1	n/a	NegCtrl	NegCtrl|09	1|Neg_Control_Human_0081|NegCtrl	NegCtrl	ACCGGTCATCATTATGGCGTAAGGGTTTAAGAGCTATGCTGGAAACAGCATAGCAAGTTTAAATAAGGCTAGTCCGTTATCAACTTGAAAAAGTGGCACCGAGTCGGTGCTTTTTT
1|Neg_Control_Human_0082|NegCtrl	GCGACTAGCGCCATGAGCGG	1	1	1	2	1	31064	1	1	0	n/a	NegCtrl	NegCtrl|09	1|Neg_Control_Human_0082|NegCtrl	NegCtrl	ACCGGCGACTAGCGCCATGAGCGGGTTTAAGAGCTATGCTGGAAACAGCATAGCAAGTTTAAATAAGGCTAGTCCGTTATCAACTTGAAAAAGTGGCACCGAGTCGGTGCTTTTTT
1|Neg_Control_Human_0083|NegCtrl	GGCGAAGTTCGACATGACAC	0	0	0	0	0	0	0	0	0	n/a	NegCtrl	NegCtrl|09	1|Neg_Control_Human_0083|NegCtrl	NegCtrl	ACCGGGCGAAGTTCGACATGACACGTTTAAGAGCTATGCTGGAAACAGCATAGCAAGTTTAAATAAGGCTAGTCCGTTATCAACTTGAAAAAGTGGCACCGAGTCGGTGCTTTTTT
1|Neg_Control_Human_0084|NegCtrl	GCTGTCGTGTGGAGGCTATG	0	0	0	0	0	0	0	0	0	n/a	NegCtrl	NegCtrl|09	1|Neg_Control_Human_0084|NegCtrl	NegCtrl	ACCGGCTGTCGTGTGGAGGCTATGGTTTAAGAGCTATGCTGGAAACAGCATAGCAAGTTTAAATAAGGCTAGTCCGTTATCAACTTGAAAAAGTGGCACCGAGTCGGTGCTTTTTT
1|Neg_Control_Human_0085|NegCtrl	GCGGAGAGCATTGACCTCAT	0	0	0	0	0	0	0	0	1	n/a	NegCtrl	NegCtrl|09	1|Neg_Control_Human_0085|NegCtrl	NegCtrl	ACCGGCGGAGAGCATTGACCTCATGTTTAAGAGCTATGCTGGAAACAGCATAGCAAGTTTAAATAAGGCTAGTCCGTTATCAACTTGAAAAAGTGGCACCGAGTCGGTGCTTTTTT
1|Neg_Control_Human_0086|NegCtrl	GACTAATGGACCAAGTCAGT	0	0	0	0	0	0	0	0	1	n/a	NegCtrl	NegCtrl|09	1|Neg_Control_Human_0086|NegCtrl	NegCtrl	ACCGGACTAATGGACCAAGTCAGTGTTTAAGAGCTATGCTGGAAACAGCATAGCAAGTTTAAATAAGGCTAGTCCGTTATCAACTTGAAAAAGTGGCACCGAGTCGGTGCTTTTTT
1|Neg_Control_Human_0087|NegCtrl	GCGGATTAGAGGTAATGCGG	0	0	0	0	0	0	0	0	0	n/a	NegCtrl	NegCtrl|09	1|Neg_Control_Human_0087|NegCtrl	NegCtrl	ACCGGCGGATTAGAGGTAATGCGGGTTTAAGAGCTATGCTGGAAACAGCATAGCAAGTTTAAATAAGGCTAGTCCGTTATCAACTTGAAAAAGTGGCACCGAGTCGGTGCTTTTTT
1|Neg_Control_Human_0088|NegCtrl	GCCGACGGCAATCAGTACGC	0	1	0	0	0	28940	3	1	0	n/a	NegCtrl	NegCtrl|09	1|Neg_Control_Human_0088|NegCtrl	NegCtrl	ACCGGCCGACGGCAATCAGTACGCGTTTAAGAGCTATGCTGGAAACAGCATAGCAAGTTTAAATAAGGCTAGTCCGTTATCAACTTGAAAAAGTGGCACCGAGTCGGTGCTTTTTT
1|Neg_Control_Human_0089|NegCtrl	GTAACCTCTCGAGCGATAGA	0	0	0	0	0	0	0	0	0	n/a	NegCtrl	NegCtrl|09	1|Neg_Control_Human_0089|NegCtrl	NegCtrl	ACCGGTAACCTCTCGAGCGATAGAGTTTAAGAGCTATGCTGGAAACAGCATAGCAAGTTTAAATAAGGCTAGTCCGTTATCAACTTGAAAAAGTGGCACCGAGTCGGTGCTTTTTT
1|Neg_Control_Human_0090|NegCtrl	GACTTGTATGTGGCTTACGG	0	0	0	0	0	0	0	0	0	n/a	NegCtrl	NegCtrl|09	1|Neg_Control_Human_0090|NegCtrl	NegCtrl	ACCGGACTTGTATGTGGCTTACGGGTTTAAGAGCTATGCTGGAAACAGCATAGCAAGTTTAAATAAGGCTAGTCCGTTATCAACTTGAAAAAGTGGCACCGAGTCGGTGCTTTTTT
1|Neg_Control_Human_0091|NegCtrl	GTCACTGTGGTCGAACATGT	0	0	0	0	0	0	0	0	0	n/a	NegCtrl	NegCtrl|10	1|Neg_Control_Human_0091|NegCtrl	NegCtrl	ACCGGTCACTGTGGTCGAACATGTGTTTAAGAGCTATGCTGGAAACAGCATAGCAAGTTTAAATAAGGCTAGTCCGTTATCAACTTGAAAAAGTGGCACCGAGTCGGTGCTTTTTT
1|Neg_Control_Human_0092|NegCtrl	GTACTCCAATCCGCGATGAC	0	0	0	0	0	0	0	0	0	n/a	NegCtrl	NegCtrl|10	1|Neg_Control_Human_0092|NegCtrl	NegCtrl	ACCGGTACTCCAATCCGCGATGACGTTTAAGAGCTATGCTGGAAACAGCATAGCAAGTTTAAATAAGGCTAGTCCGTTATCAACTTGAAAAAGTGGCACCGAGTCGGTGCTTTTTT
1|Neg_Control_Human_0093|NegCtrl	GCGTTGGCACGATGTTACGG	0	0	0	0	0	0	0	0	0	n/a	NegCtrl	NegCtrl|10	1|Neg_Control_Human_0093|NegCtrl	NegCtrl	ACCGGCGTTGGCACGATGTTACGGGTTTAAGAGCTATGCTGGAAACAGCATAGCAAGTTTAAATAAGGCTAGTCCGTTATCAACTTGAAAAAGTGGCACCGAGTCGGTGCTTTTTT
1|Neg_Control_Human_0094|NegCtrl	GAACCAGCCGGCTAGTATGA	0	0	0	0	0	0	0	0	0	n/a	NegCtrl	NegCtrl|10	1|Neg_Control_Human_0094|NegCtrl	NegCtrl	ACCGGAACCAGCCGGCTAGTATGAGTTTAAGAGCTATGCTGGAAACAGCATAGCAAGTTTAAATAAGGCTAGTCCGTTATCAACTTGAAAAAGTGGCACCGAGTCGGTGCTTTTTT
1|Neg_Control_Human_0095|NegCtrl	GTATACTAGCTAACCACACG	0	0	0	0	0	0	0	0	0	n/a	NegCtrl	NegCtrl|10	1|Neg_Control_Human_0095|NegCtrl	NegCtrl	ACCGGTATACTAGCTAACCACACGGTTTAAGAGCTATGCTGGAAACAGCATAGCAAGTTTAAATAAGGCTAGTCCGTTATCAACTTGAAAAAGTGGCACCGAGTCGGTGCTTTTTT
1|Neg_Control_Human_0096|NegCtrl	GAATCGGAATAGTTGATTCG	0	0	0	0	0	0	0	0	0	n/a	NegCtrl	NegCtrl|10	1|Neg_Control_Human_0096|NegCtrl	NegCtrl	ACCGGAATCGGAATAGTTGATTCGGTTTAAGAGCTATGCTGGAAACAGCATAGCAAGTTTAAATAAGGCTAGTCCGTTATCAACTTGAAAAAGTGGCACCGAGTCGGTGCTTTTTT
1|Neg_Control_Human_0097|NegCtrl	GAGCACTTGCATGAGGCGGT	0	0	0	0	0	0	0	0	3	n/a	NegCtrl	NegCtrl|10	1|Neg_Control_Human_0097|NegCtrl	NegCtrl	ACCGGAGCACTTGCATGAGGCGGTGTTTAAGAGCTATGCTGGAAACAGCATAGCAAGTTTAAATAAGGCTAGTCCGTTATCAACTTGAAAAAGTGGCACCGAGTCGGTGCTTTTTT
1|Neg_Control_Human_0098|NegCtrl	GAACGGCGATGAAGCCAGCC	0	0	0	0	0	0	0	0	0	n/a	NegCtrl	NegCtrl|10	1|Neg_Control_Human_0098|NegCtrl	NegCtrl	ACCGGAACGGCGATGAAGCCAGCCGTTTAAGAGCTATGCTGGAAACAGCATAGCAAGTTTAAATAAGGCTAGTCCGTTATCAACTTGAAAAAGTGGCACCGAGTCGGTGCTTTTTT
1|Neg_Control_Human_0099|NegCtrl	GCAACCGAGATGAGAGGTTC	0	0	0	0	0	0	0	0	0	n/a	NegCtrl	NegCtrl|10	1|Neg_Control_Human_0099|NegCtrl	NegCtrl	ACCGGCAACCGAGATGAGAGGTTCGTTTAAGAGCTATGCTGGAAACAGCATAGCAAGTTTAAATAAGGCTAGTCCGTTATCAACTTGAAAAAGTGGCACCGAGTCGGTGCTTTTTT
1|Neg_Control_Human_0100|NegCtrl	GCAAGATCAATATGCGTGAT	0	0	0	0	0	0	0	0	0	n/a	NegCtrl	NegCtrl|10	1|Neg_Control_Human_0100|NegCtrl	NegCtrl	ACCGGCAAGATCAATATGCGTGATGTTTAAGAGCTATGCTGGAAACAGCATAGCAAGTTTAAATAAGGCTAGTCCGTTATCAACTTGAAAAAGTGGCACCGAGTCGGTGCTTTTTT
1|Neg_Control_Human_GA_0101|NegCtrl	ACGGAGGCTAAGCGTCGCAA	0	0	0	0	0	0	0	0	0	n/a	NegCtrl	NegCtrl|11	1|Neg_Control_Human_GA_0101|NegCtrl	NegCtrl	ACCGACGGAGGCTAAGCGTCGCAAGTTTAAGAGCTATGCTGGAAACAGCATAGCAAGTTTAAATAAGGCTAGTCCGTTATCAACTTGAAAAAGTGGCACCGAGTCGGTGCTTTTTT
1|Neg_Control_Human_GA_0102|NegCtrl	CGCTTCCGCGGCCCGTTCAA	0	0	3566	0	0	0	0	0	0	n/a	NegCtrl	NegCtrl|11	1|Neg_Control_Human_GA_0102|NegCtrl	NegCtrl	ACCGCGCTTCCGCGGCCCGTTCAAGTTTAAGAGCTATGCTGGAAACAGCATAGCAAGTTTAAATAAGGCTAGTCCGTTATCAACTTGAAAAAGTGGCACCGAGTCGGTGCTTTTTT
1|Neg_Control_Human_GA_0103|NegCtrl	ATCGTTTCCGCTTAACGGCG	0	0	0	0	0	0	0	0	0	n/a	NegCtrl	NegCtrl|11	1|Neg_Control_Human_GA_0103|NegCtrl	NegCtrl	ACCGATCGTTTCCGCTTAACGGCGGTTTAAGAGCTATGCTGGAAACAGCATAGCAAGTTTAAATAAGGCTAGTCCGTTATCAACTTGAAAAAGTGGCACCGAGTCGGTGCTTTTTT
1|Neg_Control_Human_GA_0104|NegCtrl	GTAGGCGCGCCGCTCTCTAC	0	0	0	0	0	0	0	0	0	n/a	NegCtrl	NegCtrl|11	1|Neg_Control_Human_GA_0104|NegCtrl	NegCtrl	ACCGGTAGGCGCGCCGCTCTCTACGTTTAAGAGCTATGCTGGAAACAGCATAGCAAGTTTAAATAAGGCTAGTCCGTTATCAACTTGAAAAAGTGGCACCGAGTCGGTGCTTTTTT
1|Neg_Control_Human_GA_0105|NegCtrl	CCATATCGGGGCGAGACATG	0	0	0	0	0	0	0	0	0	n/a	NegCtrl	NegCtrl|11	1|Neg_Control_Human_GA_0105|NegCtrl	NegCtrl	ACCGCCATATCGGGGCGAGACATGGTTTAAGAGCTATGCTGGAAACAGCATAGCAAGTTTAAATAAGGCTAGTCCGTTATCAACTTGAAAAAGTGGCACCGAGTCGGTGCTTTTTT
1|Neg_Control_Human_GA_0106|NegCtrl	TACTAACGCCGCTCCTACAG	0	0	0	2	0	0	0	0	0	n/a	NegCtrl	NegCtrl|11	1|Neg_Control_Human_GA_0106|NegCtrl	NegCtrl	ACCGTACTAACGCCGCTCCTACAGGTTTAAGAGCTATGCTGGAAACAGCATAGCAAGTTTAAATAAGGCTAGTCCGTTATCAACTTGAAAAAGTGGCACCGAGTCGGTGCTTTTTT
1|Neg_Control_Human_GA_0107|NegCtrl	TGAGGATCATGTCGAGCGCC	0	0	0	0	0	0	0	0	1	n/a	NegCtrl	NegCtrl|11	1|Neg_Control_Human_GA_0107|NegCtrl	NegCtrl	ACCGTGAGGATCATGTCGAGCGCCGTTTAAGAGCTATGCTGGAAACAGCATAGCAAGTTTAAATAAGGCTAGTCCGTTATCAACTTGAAAAAGTGGCACCGAGTCGGTGCTTTTTT
1|Neg_Control_Human_GA_0108|NegCtrl	GGGCCCGCATAGGATATCGC	0	0	0	0	0	0	0	0	0	n/a	NegCtrl	NegCtrl|11	1|Neg_Control_Human_GA_0108|NegCtrl	NegCtrl	ACCGGGGCCCGCATAGGATATCGCGTTTAAGAGCTATGCTGGAAACAGCATAGCAAGTTTAAATAAGGCTAGTCCGTTATCAACTTGAAAAAGTGGCACCGAGTCGGTGCTTTTTT
1|Neg_Control_Human_GA_0109|NegCtrl	TAGACAACCGCGGAGAATGC	0	0	0	0	0	0	0	0	0	n/a	NegCtrl	NegCtrl|11	1|Neg_Control_Human_GA_0109|NegCtrl	NegCtrl	ACCGTAGACAACCGCGGAGAATGCGTTTAAGAGCTATGCTGGAAACAGCATAGCAAGTTTAAATAAGGCTAGTCCGTTATCAACTTGAAAAAGTGGCACCGAGTCGGTGCTTTTTT
1|Neg_Control_Human_GA_0110|NegCtrl	ACGGGCGGCTATCGCTGACT	0	1361	0	0	0	0	0	0	0	n/a	NegCtrl	NegCtrl|11	1|Neg_Control_Human_GA_0110|NegCtrl	NegCtrl	ACCGACGGGCGGCTATCGCTGACTGTTTAAGAGCTATGCTGGAAACAGCATAGCAAGTTTAAATAAGGCTAGTCCGTTATCAACTTGAAAAAGTGGCACCGAGTCGGTGCTTTTTT
1|Neg_Control_Human_GA_0111|NegCtrl	CGCGGAAATTTTACCGACGA	0	0	0	0	0	0	0	0	0	n/a	NegCtrl	NegCtrl|12	1|Neg_Control_Human_GA_0111|NegCtrl	NegCtrl	ACCGCGCGGAAATTTTACCGACGAGTTTAAGAGCTATGCTGGAAACAGCATAGCAAGTTTAAATAAGGCTAGTCCGTTATCAACTTGAAAAAGTGGCACCGAGTCGGTGCTTTTTT
1|Neg_Control_Human_GA_0112|NegCtrl	CTTACAATCGTCGGTCCAAT	0	0	0	0	0	0	0	0	0	n/a	NegCtrl	NegCtrl|12	1|Neg_Control_Human_GA_0112|NegCtrl	NegCtrl	ACCGCTTACAATCGTCGGTCCAATGTTTAAGAGCTATGCTGGAAACAGCATAGCAAGTTTAAATAAGGCTAGTCCGTTATCAACTTGAAAAAGTGGCACCGAGTCGGTGCTTTTTT
1|Neg_Control_Human_GA_0113|NegCtrl	GCGTGCGTCCCGGGTTACCC	0	0	0	0	0	0	0	0	0	n/a	NegCtrl	NegCtrl|12	1|Neg_Control_Human_GA_0113|NegCtrl	NegCtrl	ACCGGCGTGCGTCCCGGGTTACCCGTTTAAGAGCTATGCTGGAAACAGCATAGCAAGTTTAAATAAGGCTAGTCCGTTATCAACTTGAAAAAGTGGCACCGAGTCGGTGCTTTTTT
1|Neg_Control_Human_GA_0114|NegCtrl	CGGAGTAACAAGCGGACGGA	0	0	0	0	0	0	0	0	0	n/a	NegCtrl	NegCtrl|12	1|Neg_Control_Human_GA_0114|NegCtrl	NegCtrl	ACCGCGGAGTAACAAGCGGACGGAGTTTAAGAGCTATGCTGGAAACAGCATAGCAAGTTTAAATAAGGCTAGTCCGTTATCAACTTGAAAAAGTGGCACCGAGTCGGTGCTTTTTT
1|Neg_Control_Human_GA_0115|NegCtrl	CGAGTGTTATACGCACCGTT	0	0	0	0	0	0	0	0	0	n/a	NegCtrl	NegCtrl|12	1|Neg_Control_Human_GA_0115|NegCtrl	NegCtrl	ACCGCGAGTGTTATACGCACCGTTGTTTAAGAGCTATGCTGGAAACAGCATAGCAAGTTTAAATAAGGCTAGTCCGTTATCAACTTGAAAAAGTGGCACCGAGTCGGTGCTTTTTT
1|Neg_Control_Human_GA_0116|NegCtrl	CGACTAACCGGAAACTTTTT	0	0	0	0	0	0	0	0	0	n/a	NegCtrl	NegCtrl|12	1|Neg_Control_Human_GA_0116|NegCtrl	NegCtrl	ACCGCGACTAACCGGAAACTTTTTGTTTAAGAGCTATGCTGGAAACAGCATAGCAAGTTTAAATAAGGCTAGTCCGTTATCAACTTGAAAAAGTGGCACCGAGTCGGTGCTTTTTT
1|Neg_Control_Human_GA_0117|NegCtrl	CAACGGGTTCTCCCGGCTAC	0	0	0	0	0	0	0	0	2	n/a	NegCtrl	NegCtrl|12	1|Neg_Control_Human_GA_0117|NegCtrl	NegCtrl	ACCGCAACGGGTTCTCCCGGCTACGTTTAAGAGCTATGCTGGAAACAGCATAGCAAGTTTAAATAAGGCTAGTCCGTTATCAACTTGAAAAAGTGGCACCGAGTCGGTGCTTTTTT
1|Neg_Control_Human_GA_0118|NegCtrl	CAGGAGTCGCCGATACGCGT	0	0	0	0	0	0	0	0	0	n/a	NegCtrl	NegCtrl|12	1|Neg_Control_Human_GA_0118|NegCtrl	NegCtrl	ACCGCAGGAGTCGCCGATACGCGTGTTTAAGAGCTATGCTGGAAACAGCATAGCAAGTTTAAATAAGGCTAGTCCGTTATCAACTTGAAAAAGTGGCACCGAGTCGGTGCTTTTTT
1|Neg_Control_Human_GA_0119|NegCtrl	TTCACGTCGTCTCGCGACCA	3	75266	0	1	2	4	1	0	10	n/a	NegCtrl	NegCtrl|12	1|Neg_Control_Human_GA_0119|NegCtrl	NegCtrl	ACCGTTCACGTCGTCTCGCGACCAGTTTAAGAGCTATGCTGGAAACAGCATAGCAAGTTTAAATAAGGCTAGTCCGTTATCAACTTGAAAAAGTGGCACCGAGTCGGTGCTTTTTT
1|Neg_Control_Human_GA_0120|NegCtrl	GTGTCGGATTCCGCCGCTTA	0	0	0	0	0	0	0	0	0	n/a	NegCtrl	NegCtrl|12	1|Neg_Control_Human_GA_0120|NegCtrl	NegCtrl	ACCGGTGTCGGATTCCGCCGCTTAGTTTAAGAGCTATGCTGGAAACAGCATAGCAAGTTTAAATAAGGCTAGTCCGTTATCAACTTGAAAAAGTGGCACCGAGTCGGTGCTTTTTT
1|Neg_Control_Human_GA_0121|NegCtrl	CACGAACTCACACCGCGCGA	0	0	0	0	0	0	0	0	0	n/a	NegCtrl	NegCtrl|13	1|Neg_Control_Human_GA_0121|NegCtrl	NegCtrl	ACCGCACGAACTCACACCGCGCGAGTTTAAGAGCTATGCTGGAAACAGCATAGCAAGTTTAAATAAGGCTAGTCCGTTATCAACTTGAAAAAGTGGCACCGAGTCGGTGCTTTTTT
1|Neg_Control_Human_GA_0122|NegCtrl	CGCTAGTACGCTCCTCTATA	0	0	0	0	0	0	0	0	0	n/a	NegCtrl	NegCtrl|13	1|Neg_Control_Human_GA_0122|NegCtrl	NegCtrl	ACCGCGCTAGTACGCTCCTCTATAGTTTAAGAGCTATGCTGGAAACAGCATAGCAAGTTTAAATAAGGCTAGTCCGTTATCAACTTGAAAAAGTGGCACCGAGTCGGTGCTTTTTT
1|Neg_Control_Human_GA_0123|NegCtrl	TCGCGCTTGGGTTATACGCT	0	0	0	0	0	0	0	0	0	n/a	NegCtrl	NegCtrl|13	1|Neg_Control_Human_GA_0123|NegCtrl	NegCtrl	ACCGTCGCGCTTGGGTTATACGCTGTTTAAGAGCTATGCTGGAAACAGCATAGCAAGTTTAAATAAGGCTAGTCCGTTATCAACTTGAAAAAGTGGCACCGAGTCGGTGCTTTTTT
1|Neg_Control_Human_GA_0124|NegCtrl	CTATCTCGAGTGGTAATGCG	0	0	0	0	0	0	0	0	1	n/a	NegCtrl	NegCtrl|13	1|Neg_Control_Human_GA_0124|NegCtrl	NegCtrl	ACCGCTATCTCGAGTGGTAATGCGGTTTAAGAGCTATGCTGGAAACAGCATAGCAAGTTTAAATAAGGCTAGTCCGTTATCAACTTGAAAAAGTGGCACCGAGTCGGTGCTTTTTT
1|Neg_Control_Human_GA_0125|NegCtrl	AATCGACTCGAACTTCGTGT	0	0	0	0	0	0	0	0	0	n/a	NegCtrl	NegCtrl|13	1|Neg_Control_Human_GA_0125|NegCtrl	NegCtrl	ACCGAATCGACTCGAACTTCGTGTGTTTAAGAGCTATGCTGGAAACAGCATAGCAAGTTTAAATAAGGCTAGTCCGTTATCAACTTGAAAAAGTGGCACCGAGTCGGTGCTTTTTT
1|Neg_Control_Human_GA_0126|NegCtrl	CCCGATGGACTATACCGAAC	1	0	13581	0	27148	1	1	0	1	n/a	NegCtrl	NegCtrl|13	1|Neg_Control_Human_GA_0126|NegCtrl	NegCtrl	ACCGCCCGATGGACTATACCGAACGTTTAAGAGCTATGCTGGAAACAGCATAGCAAGTTTAAATAAGGCTAGTCCGTTATCAACTTGAAAAAGTGGCACCGAGTCGGTGCTTTTTT
1|Neg_Control_Human_GA_0127|NegCtrl	ACGTTCGAGTACGACCAGCT	0	0	0	0	0	0	0	0	0	n/a	NegCtrl	NegCtrl|13	1|Neg_Control_Human_GA_0127|NegCtrl	NegCtrl	ACCGACGTTCGAGTACGACCAGCTGTTTAAGAGCTATGCTGGAAACAGCATAGCAAGTTTAAATAAGGCTAGTCCGTTATCAACTTGAAAAAGTGGCACCGAGTCGGTGCTTTTTT
1|Neg_Control_Human_GA_0128|NegCtrl	CGCGACGACTCAACCTAGTC	0	0	0	0	0	0	0	0	0	n/a	NegCtrl	NegCtrl|13	1|Neg_Control_Human_GA_0128|NegCtrl	NegCtrl	ACCGCGCGACGACTCAACCTAGTCGTTTAAGAGCTATGCTGGAAACAGCATAGCAAGTTTAAATAAGGCTAGTCCGTTATCAACTTGAAAAAGTGGCACCGAGTCGGTGCTTTTTT
1|Neg_Control_Human_GA_0129|NegCtrl	GGTCACCGATCGAGAGCTAG	0	0	0	0	0	0	0	0	0	n/a	NegCtrl	NegCtrl|13	1|Neg_Control_Human_GA_0129|NegCtrl	NegCtrl	ACCGGGTCACCGATCGAGAGCTAGGTTTAAGAGCTATGCTGGAAACAGCATAGCAAGTTTAAATAAGGCTAGTCCGTTATCAACTTGAAAAAGTGGCACCGAGTCGGTGCTTTTTT
1|Neg_Control_Human_GA_0130|NegCtrl	CTCAACCGACCGTATGGTCA	0	0	0	0	0	0	0	0	0	n/a	NegCtrl	NegCtrl|13	1|Neg_Control_Human_GA_0130|NegCtrl	NegCtrl	ACCGCTCAACCGACCGTATGGTCAGTTTAAGAGCTATGCTGGAAACAGCATAGCAAGTTTAAATAAGGCTAGTCCGTTATCAACTTGAAAAAGTGGCACCGAGTCGGTGCTTTTTT
1|Neg_Control_Human_GA_0131|NegCtrl	CGTATTCGACTCTCAACGCG	0	0	0	0	0	0	0	0	0	n/a	NegCtrl	NegCtrl|14	1|Neg_Control_Human_GA_0131|NegCtrl	NegCtrl	ACCGCGTATTCGACTCTCAACGCGGTTTAAGAGCTATGCTGGAAACAGCATAGCAAGTTTAAATAAGGCTAGTCCGTTATCAACTTGAAAAAGTGGCACCGAGTCGGTGCTTTTTT
1|Neg_Control_Human_GA_0132|NegCtrl	CTAGCCGCCCAGATCGAGCC	0	0	0	0	0	0	0	0	2	n/a	NegCtrl	NegCtrl|14	1|Neg_Control_Human_GA_0132|NegCtrl	NegCtrl	ACCGCTAGCCGCCCAGATCGAGCCGTTTAAGAGCTATGCTGGAAACAGCATAGCAAGTTTAAATAAGGCTAGTCCGTTATCAACTTGAAAAAGTGGCACCGAGTCGGTGCTTTTTT
1|Neg_Control_Human_GA_0133|NegCtrl	GAATCGACCGACACTAATGT	0	0	0	0	0	0	0	0	0	n/a	NegCtrl	NegCtrl|14	1|Neg_Control_Human_GA_0133|NegCtrl	NegCtrl	ACCGGAATCGACCGACACTAATGTGTTTAAGAGCTATGCTGGAAACAGCATAGCAAGTTTAAATAAGGCTAGTCCGTTATCAACTTGAAAAAGTGGCACCGAGTCGGTGCTTTTTT
1|Neg_Control_Human_GA_0134|NegCtrl	ACTTCAGTTCGGCGTAGTCA	0	0	0	0	0	0	0	0	0	n/a	NegCtrl	NegCtrl|14	1|Neg_Control_Human_GA_0134|NegCtrl	NegCtrl	ACCGACTTCAGTTCGGCGTAGTCAGTTTAAGAGCTATGCTGGAAACAGCATAGCAAGTTTAAATAAGGCTAGTCCGTTATCAACTTGAAAAAGTGGCACCGAGTCGGTGCTTTTTT
1|Neg_Control_Human_GA_0135|NegCtrl	GTGCGATGTCGCTTCAACGT	0	0	0	0	0	0	0	0	0	n/a	NegCtrl	NegCtrl|14	1|Neg_Control_Human_GA_0135|NegCtrl	NegCtrl	ACCGGTGCGATGTCGCTTCAACGTGTTTAAGAGCTATGCTGGAAACAGCATAGCAAGTTTAAATAAGGCTAGTCCGTTATCAACTTGAAAAAGTGGCACCGAGTCGGTGCTTTTTT
1|Neg_Control_Human_GA_0136|NegCtrl	CGCCTAATTTCCGGATCAAT	0	0	0	0	0	0	0	0	0	n/a	NegCtrl	NegCtrl|14	1|Neg_Control_Human_GA_0136|NegCtrl	NegCtrl	ACCGCGCCTAATTTCCGGATCAATGTTTAAGAGCTATGCTGGAAACAGCATAGCAAGTTTAAATAAGGCTAGTCCGTTATCAACTTGAAAAAGTGGCACCGAGTCGGTGCTTTTTT
1|Neg_Control_Human_GA_0137|NegCtrl	CGTGGCCGGAACCGTCATAG	0	0	0	0	0	0	0	0	0	n/a	NegCtrl	NegCtrl|14	1|Neg_Control_Human_GA_0137|NegCtrl	NegCtrl	ACCGCGTGGCCGGAACCGTCATAGGTTTAAGAGCTATGCTGGAAACAGCATAGCAAGTTTAAATAAGGCTAGTCCGTTATCAACTTGAAAAAGTGGCACCGAGTCGGTGCTTTTTT
1|Neg_Control_Human_GA_0138|NegCtrl	ACCCTCCGAATCGTAACGGA	0	0	0	0	0	0	0	0	0	n/a	NegCtrl	NegCtrl|14	1|Neg_Control_Human_GA_0138|NegCtrl	NegCtrl	ACCGACCCTCCGAATCGTAACGGAGTTTAAGAGCTATGCTGGAAACAGCATAGCAAGTTTAAATAAGGCTAGTCCGTTATCAACTTGAAAAAGTGGCACCGAGTCGGTGCTTTTTT
1|Neg_Control_Human_GA_0139|NegCtrl	AAACGGTACGACAGCGTGTG	0	0	0	0	0	0	0	0	0	n/a	NegCtrl	NegCtrl|14	1|Neg_Control_Human_GA_0139|NegCtrl	NegCtrl	ACCGAAACGGTACGACAGCGTGTGGTTTAAGAGCTATGCTGGAAACAGCATAGCAAGTTTAAATAAGGCTAGTCCGTTATCAACTTGAAAAAGTGGCACCGAGTCGGTGCTTTTTT
1|Neg_Control_Human_GA_0140|NegCtrl	ACATAGTCGACGGCTCGATT	0	2	59331	1	1	2	0	1	3	n/a	NegCtrl	NegCtrl|14	1|Neg_Control_Human_GA_0140|NegCtrl	NegCtrl	ACCGACATAGTCGACGGCTCGATTGTTTAAGAGCTATGCTGGAAACAGCATAGCAAGTTTAAATAAGGCTAGTCCGTTATCAACTTGAAAAAGTGGCACCGAGTCGGTGCTTTTTT
1|Neg_Control_Human_GA_0141|NegCtrl	GATGGCGCTTCAGTCGTCGG	0	0	0	0	0	0	0	0	0	n/a	NegCtrl	NegCtrl|15	1|Neg_Control_Human_GA_0141|NegCtrl	NegCtrl	ACCGGATGGCGCTTCAGTCGTCGGGTTTAAGAGCTATGCTGGAAACAGCATAGCAAGTTTAAATAAGGCTAGTCCGTTATCAACTTGAAAAAGTGGCACCGAGTCGGTGCTTTTTT
1|Neg_Control_Human_GA_0142|NegCtrl	ATAATCCGGAAACGCTCGAC	0	0	0	0	0	0	0	0	1	n/a	NegCtrl	NegCtrl|15	1|Neg_Control_Human_GA_0142|NegCtrl	NegCtrl	ACCGATAATCCGGAAACGCTCGACGTTTAAGAGCTATGCTGGAAACAGCATAGCAAGTTTAAATAAGGCTAGTCCGTTATCAACTTGAAAAAGTGGCACCGAGTCGGTGCTTTTTT
1|Neg_Control_Human_GA_0143|NegCtrl	CGCCGGGCTGACAATTAACG	0	0	0	0	0	0	0	0	0	n/a	NegCtrl	NegCtrl|15	1|Neg_Control_Human_GA_0143|NegCtrl	NegCtrl	ACCGCGCCGGGCTGACAATTAACGGTTTAAGAGCTATGCTGGAAACAGCATAGCAAGTTTAAATAAGGCTAGTCCGTTATCAACTTGAAAAAGTGGCACCGAGTCGGTGCTTTTTT
1|Neg_Control_Human_GA_0144|NegCtrl	CGTCGCCATATGCCGGTGGC	0	0	0	0	0	0	0	0	0	n/a	NegCtrl	NegCtrl|15	1|Neg_Control_Human_GA_0144|NegCtrl	NegCtrl	ACCGCGTCGCCATATGCCGGTGGCGTTTAAGAGCTATGCTGGAAACAGCATAGCAAGTTTAAATAAGGCTAGTCCGTTATCAACTTGAAAAAGTGGCACCGAGTCGGTGCTTTTTT
1|Neg_Control_Human_GA_0145|NegCtrl	CGGGCCTATAACACCATCGA	0	0	0	0	0	0	0	0	0	n/a	NegCtrl	NegCtrl|15	1|Neg_Control_Human_GA_0145|NegCtrl	NegCtrl	ACCGCGGGCCTATAACACCATCGAGTTTAAGAGCTATGCTGGAAACAGCATAGCAAGTTTAAATAAGGCTAGTCCGTTATCAACTTGAAAAAGTGGCACCGAGTCGGTGCTTTTTT
1|Neg_Control_Human_GA_0146|NegCtrl	CGCCGTTCCGAGATACTTGA	0	0	0	0	0	0	0	0	1	n/a	NegCtrl	NegCtrl|15	1|Neg_Control_Human_GA_0146|NegCtrl	NegCtrl	ACCGCGCCGTTCCGAGATACTTGAGTTTAAGAGCTATGCTGGAAACAGCATAGCAAGTTTAAATAAGGCTAGTCCGTTATCAACTTGAAAAAGTGGCACCGAGTCGGTGCTTTTTT
1|Neg_Control_Human_GA_0147|NegCtrl	CGGGACGTCGCGAAAATGTA	0	0	0	0	0	0	0	0	0	n/a	NegCtrl	NegCtrl|15	1|Neg_Control_Human_GA_0147|NegCtrl	NegCtrl	ACCGCGGGACGTCGCGAAAATGTAGTTTAAGAGCTATGCTGGAAACAGCATAGCAAGTTTAAATAAGGCTAGTCCGTTATCAACTTGAAAAAGTGGCACCGAGTCGGTGCTTTTTT
1|Neg_Control_Human_GA_0148|NegCtrl	TCGGCATACGGGACACACGC	0	0	0	0	0	0	0	0	0	n/a	NegCtrl	NegCtrl|15	1|Neg_Control_Human_GA_0148|NegCtrl	NegCtrl	ACCGTCGGCATACGGGACACACGCGTTTAAGAGCTATGCTGGAAACAGCATAGCAAGTTTAAATAAGGCTAGTCCGTTATCAACTTGAAAAAGTGGCACCGAGTCGGTGCTTTTTT
1|Neg_Control_Human_GA_0149|NegCtrl	AGCTCCATCGCCGCGATAAT	0	0	0	0	0	0	0	0	1	n/a	NegCtrl	NegCtrl|15	1|Neg_Control_Human_GA_0149|NegCtrl	NegCtrl	ACCGAGCTCCATCGCCGCGATAATGTTTAAGAGCTATGCTGGAAACAGCATAGCAAGTTTAAATAAGGCTAGTCCGTTATCAACTTGAAAAAGTGGCACCGAGTCGGTGCTTTTTT
1|Neg_Control_Human_GA_0150|NegCtrl	ATCGTATCATCAGCTAGCGC	0	0	0	0	0	0	0	0	0	n/a	NegCtrl	NegCtrl|15	1|Neg_Control_Human_GA_0150|NegCtrl	NegCtrl	ACCGATCGTATCATCAGCTAGCGCGTTTAAGAGCTATGCTGGAAACAGCATAGCAAGTTTAAATAAGGCTAGTCCGTTATCAACTTGAAAAAGTGGCACCGAGTCGGTGCTTTTTT
1|Neg_Control_Human_GA_0151|NegCtrl	TCGATCGAGGTTGCATTCGG	0	0	0	0	0	0	0	0	0	n/a	NegCtrl	NegCtrl|16	1|Neg_Control_Human_GA_0151|NegCtrl	NegCtrl	ACCGTCGATCGAGGTTGCATTCGGGTTTAAGAGCTATGCTGGAAACAGCATAGCAAGTTTAAATAAGGCTAGTCCGTTATCAACTTGAAAAAGTGGCACCGAGTCGGTGCTTTTTT
1|Neg_Control_Human_GA_0152|NegCtrl	CTCGACAGTTCGTCCCGAGC	0	0	0	0	0	0	0	0	0	n/a	NegCtrl	NegCtrl|16	1|Neg_Control_Human_GA_0152|NegCtrl	NegCtrl	ACCGCTCGACAGTTCGTCCCGAGCGTTTAAGAGCTATGCTGGAAACAGCATAGCAAGTTTAAATAAGGCTAGTCCGTTATCAACTTGAAAAAGTGGCACCGAGTCGGTGCTTTTTT
1|Neg_Control_Human_GA_0153|NegCtrl	CGGTAGTATTAATCGCTGAC	0	0	0	0	0	0	0	0	0	n/a	NegCtrl	NegCtrl|16	1|Neg_Control_Human_GA_0153|NegCtrl	NegCtrl	ACCGCGGTAGTATTAATCGCTGACGTTTAAGAGCTATGCTGGAAACAGCATAGCAAGTTTAAATAAGGCTAGTCCGTTATCAACTTGAAAAAGTGGCACCGAGTCGGTGCTTTTTT
1|Neg_Control_Human_GA_0154|NegCtrl	TGAACGCGTGTTTCCTTGCA	4	3	1	0	0	0	1	1	38309	n/a	NegCtrl	NegCtrl|16	1|Neg_Control_Human_GA_0154|NegCtrl	NegCtrl	ACCGTGAACGCGTGTTTCCTTGCAGTTTAAGAGCTATGCTGGAAACAGCATAGCAAGTTTAAATAAGGCTAGTCCGTTATCAACTTGAAAAAGTGGCACCGAGTCGGTGCTTTTTT
1|Neg_Control_Human_GA_0155|NegCtrl	CGACGCTAGGTAACGTAGAG	0	0	0	0	0	0	0	0	0	n/a	NegCtrl	NegCtrl|16	1|Neg_Control_Human_GA_0155|NegCtrl	NegCtrl	ACCGCGACGCTAGGTAACGTAGAGGTTTAAGAGCTATGCTGGAAACAGCATAGCAAGTTTAAATAAGGCTAGTCCGTTATCAACTTGAAAAAGTGGCACCGAGTCGGTGCTTTTTT
1|Neg_Control_Human_GA_0156|NegCtrl	CATTGTTGAGCGGGCGCGCT	0	1	13134	0	0	0	0	0	0	n/a	NegCtrl	NegCtrl|16	1|Neg_Control_Human_GA_0156|NegCtrl	NegCtrl	ACCGCATTGTTGAGCGGGCGCGCTGTTTAAGAGCTATGCTGGAAACAGCATAGCAAGTTTAAATAAGGCTAGTCCGTTATCAACTTGAAAAAGTGGCACCGAGTCGGTGCTTTTTT
1|Neg_Control_Human_GA_0157|NegCtrl	CCGCTATTGAAACCGCCCAC	0	1	41003	1	1	0	0	17464	0	n/a	NegCtrl	NegCtrl|16	1|Neg_Control_Human_GA_0157|NegCtrl	NegCtrl	ACCGCCGCTATTGAAACCGCCCACGTTTAAGAGCTATGCTGGAAACAGCATAGCAAGTTTAAATAAGGCTAGTCCGTTATCAACTTGAAAAAGTGGCACCGAGTCGGTGCTTTTTT
1|Neg_Control_Human_GA_0158|NegCtrl	AGACACGTCACCGGTCAAAA	0	0	0	0	0	0	0	0	0	n/a	NegCtrl	NegCtrl|16	1|Neg_Control_Human_GA_0158|NegCtrl	NegCtrl	ACCGAGACACGTCACCGGTCAAAAGTTTAAGAGCTATGCTGGAAACAGCATAGCAAGTTTAAATAAGGCTAGTCCGTTATCAACTTGAAAAAGTGGCACCGAGTCGGTGCTTTTTT
1|Neg_Control_Human_GA_0159|NegCtrl	TTTACGATCTAGCGGCGTAG	0	0	0	0	0	0	0	0	0	n/a	NegCtrl	NegCtrl|16	1|Neg_Control_Human_GA_0159|NegCtrl	NegCtrl	ACCGTTTACGATCTAGCGGCGTAGGTTTAAGAGCTATGCTGGAAACAGCATAGCAAGTTTAAATAAGGCTAGTCCGTTATCAACTTGAAAAAGTGGCACCGAGTCGGTGCTTTTTT
1|Neg_Control_Human_GA_0160|NegCtrl	TTCGCACGATTGCACCTTGG	28011	0	1	0	0	1	1	4	1	n/a	NegCtrl	NegCtrl|16	1|Neg_Control_Human_GA_0160|NegCtrl	NegCtrl	ACCGTTCGCACGATTGCACCTTGGGTTTAAGAGCTATGCTGGAAACAGCATAGCAAGTTTAAATAAGGCTAGTCCGTTATCAACTTGAAAAAGTGGCACCGAGTCGGTGCTTTTTT
1|Neg_Control_Human_GA_0161|NegCtrl	GGTTAGAGACTAGGCGCGCG	0	1	0	1	27204	0	1	1	0	n/a	NegCtrl	NegCtrl|17	1|Neg_Control_Human_GA_0161|NegCtrl	NegCtrl	ACCGGGTTAGAGACTAGGCGCGCGGTTTAAGAGCTATGCTGGAAACAGCATAGCAAGTTTAAATAAGGCTAGTCCGTTATCAACTTGAAAAAGTGGCACCGAGTCGGTGCTTTTTT
1|Neg_Control_Human_GA_0162|NegCtrl	CCTCCGTGCTAACGCGGACG	0	0	0	0	0	0	0	0	1	n/a	NegCtrl	NegCtrl|17	1|Neg_Control_Human_GA_0162|NegCtrl	NegCtrl	ACCGCCTCCGTGCTAACGCGGACGGTTTAAGAGCTATGCTGGAAACAGCATAGCAAGTTTAAATAAGGCTAGTCCGTTATCAACTTGAAAAAGTGGCACCGAGTCGGTGCTTTTTT
1|Neg_Control_Human_GA_0163|NegCtrl	TTATCGCGTAGTGCTGACGT	1	1	0	2	25277	1	0	0	0	n/a	NegCtrl	NegCtrl|17	1|Neg_Control_Human_GA_0163|NegCtrl	NegCtrl	ACCGTTATCGCGTAGTGCTGACGTGTTTAAGAGCTATGCTGGAAACAGCATAGCAAGTTTAAATAAGGCTAGTCCGTTATCAACTTGAAAAAGTGGCACCGAGTCGGTGCTTTTTT
1|Neg_Control_Human_GA_0164|NegCtrl	TACGCTTGCGTTTAGCGTCC	0	0	0	0	0	0	0	0	0	n/a	NegCtrl	NegCtrl|17	1|Neg_Control_Human_GA_0164|NegCtrl	NegCtrl	ACCGTACGCTTGCGTTTAGCGTCCGTTTAAGAGCTATGCTGGAAACAGCATAGCAAGTTTAAATAAGGCTAGTCCGTTATCAACTTGAAAAAGTGGCACCGAGTCGGTGCTTTTTT
1|Neg_Control_Human_GA_0165|NegCtrl	CGCGGCCCACGCGTCATCGC	0	0	0	0	0	0	0	0	1	n/a	NegCtrl	NegCtrl|17	1|Neg_Control_Human_GA_0165|NegCtrl	NegCtrl	ACCGCGCGGCCCACGCGTCATCGCGTTTAAGAGCTATGCTGGAAACAGCATAGCAAGTTTAAATAAGGCTAGTCCGTTATCAACTTGAAAAAGTGGCACCGAGTCGGTGCTTTTTT
1|Neg_Control_Human_GA_0166|NegCtrl	AGCTCGCCATGTCGGTTCTC	2	1	3	0	1	1	0	45667	0	n/a	NegCtrl	NegCtrl|17	1|Neg_Control_Human_GA_0166|NegCtrl	NegCtrl	ACCGAGCTCGCCATGTCGGTTCTCGTTTAAGAGCTATGCTGGAAACAGCATAGCAAGTTTAAATAAGGCTAGTCCGTTATCAACTTGAAAAAGTGGCACCGAGTCGGTGCTTTTTT
1|Neg_Control_Human_GA_0167|NegCtrl	AACTAGCCCGAGCAGCTTCG	0	0	0	0	0	0	0	0	0	n/a	NegCtrl	NegCtrl|17	1|Neg_Control_Human_GA_0167|NegCtrl	NegCtrl	ACCGAACTAGCCCGAGCAGCTTCGGTTTAAGAGCTATGCTGGAAACAGCATAGCAAGTTTAAATAAGGCTAGTCCGTTATCAACTTGAAAAAGTGGCACCGAGTCGGTGCTTTTTT
1|Neg_Control_Human_GA_0168|NegCtrl	CGCAAGGTGTCGGTAACCCT	0	0	0	0	0	0	0	0	0	n/a	NegCtrl	NegCtrl|17	1|Neg_Control_Human_GA_0168|NegCtrl	NegCtrl	ACCGCGCAAGGTGTCGGTAACCCTGTTTAAGAGCTATGCTGGAAACAGCATAGCAAGTTTAAATAAGGCTAGTCCGTTATCAACTTGAAAAAGTGGCACCGAGTCGGTGCTTTTTT
1|Neg_Control_Human_GA_0169|NegCtrl	CTTCGACGCCATCGTGCTCA	0	0	15450	0	0	0	0	0	0	n/a	NegCtrl	NegCtrl|17	1|Neg_Control_Human_GA_0169|NegCtrl	NegCtrl	ACCGCTTCGACGCCATCGTGCTCAGTTTAAGAGCTATGCTGGAAACAGCATAGCAAGTTTAAATAAGGCTAGTCCGTTATCAACTTGAAAAAGTGGCACCGAGTCGGTGCTTTTTT
1|Neg_Control_Human_GA_0170|NegCtrl	TCCTGGATACCGCGTGGTTA	0	0	0	0	0	0	0	0	0	n/a	NegCtrl	NegCtrl|17	1|Neg_Control_Human_GA_0170|NegCtrl	NegCtrl	ACCGTCCTGGATACCGCGTGGTTAGTTTAAGAGCTATGCTGGAAACAGCATAGCAAGTTTAAATAAGGCTAGTCCGTTATCAACTTGAAAAAGTGGCACCGAGTCGGTGCTTTTTT
1|Neg_Control_Human_GA_0171|NegCtrl	ATAGCCGCCGCTCATTACTT	0	0	0	0	0	0	0	0	0	n/a	NegCtrl	NegCtrl|18	1|Neg_Control_Human_GA_0171|NegCtrl	NegCtrl	ACCGATAGCCGCCGCTCATTACTTGTTTAAGAGCTATGCTGGAAACAGCATAGCAAGTTTAAATAAGGCTAGTCCGTTATCAACTTGAAAAAGTGGCACCGAGTCGGTGCTTTTTT
1|Neg_Control_Human_GA_0172|NegCtrl	GTCGTCCGGGATTACAAAAT	0	0	0	0	0	0	0	0	0	n/a	NegCtrl	NegCtrl|18	1|Neg_Control_Human_GA_0172|NegCtrl	NegCtrl	ACCGGTCGTCCGGGATTACAAAATGTTTAAGAGCTATGCTGGAAACAGCATAGCAAGTTTAAATAAGGCTAGTCCGTTATCAACTTGAAAAAGTGGCACCGAGTCGGTGCTTTTTT
1|Neg_Control_Human_GA_0173|NegCtrl	TAATGCTGCACACGCCGAAT	0	0	0	0	0	0	0	0	0	n/a	NegCtrl	NegCtrl|18	1|Neg_Control_Human_GA_0173|NegCtrl	NegCtrl	ACCGTAATGCTGCACACGCCGAATGTTTAAGAGCTATGCTGGAAACAGCATAGCAAGTTTAAATAAGGCTAGTCCGTTATCAACTTGAAAAAGTGGCACCGAGTCGGTGCTTTTTT
1|Neg_Control_Human_GA_0174|NegCtrl	TATCGCTTCCGATTAGTCCG	0	0	0	0	0	0	0	0	0	n/a	NegCtrl	NegCtrl|18	1|Neg_Control_Human_GA_0174|NegCtrl	NegCtrl	ACCGTATCGCTTCCGATTAGTCCGGTTTAAGAGCTATGCTGGAAACAGCATAGCAAGTTTAAATAAGGCTAGTCCGTTATCAACTTGAAAAAGTGGCACCGAGTCGGTGCTTTTTT
1|Neg_Control_Human_GA_0175|NegCtrl	GTACCATACCGCGTACCCTT	0	0	0	0	0	0	0	0	0	n/a	NegCtrl	NegCtrl|18	1|Neg_Control_Human_GA_0175|NegCtrl	NegCtrl	ACCGGTACCATACCGCGTACCCTTGTTTAAGAGCTATGCTGGAAACAGCATAGCAAGTTTAAATAAGGCTAGTCCGTTATCAACTTGAAAAAGTGGCACCGAGTCGGTGCTTTTTT
1|Neg_Control_Human_GA_0176|NegCtrl	TAAGATCCGCGGGTGGCAAC	18343	0	0	0	0	0	0	0	0	n/a	NegCtrl	NegCtrl|18	1|Neg_Control_Human_GA_0176|NegCtrl	NegCtrl	ACCGTAAGATCCGCGGGTGGCAACGTTTAAGAGCTATGCTGGAAACAGCATAGCAAGTTTAAATAAGGCTAGTCCGTTATCAACTTGAAAAAGTGGCACCGAGTCGGTGCTTTTTT
1|Neg_Control_Human_GA_0177|NegCtrl	GTAGACGTCGTGAGCTTCAC	0	0	0	0	0	0	0	0	0	n/a	NegCtrl	NegCtrl|18	1|Neg_Control_Human_GA_0177|NegCtrl	NegCtrl	ACCGGTAGACGTCGTGAGCTTCACGTTTAAGAGCTATGCTGGAAACAGCATAGCAAGTTTAAATAAGGCTAGTCCGTTATCAACTTGAAAAAGTGGCACCGAGTCGGTGCTTTTTT
1|Neg_Control_Human_GA_0178|NegCtrl	TCGCGGACATAGGGCTCTAA	0	0	0	0	0	0	0	0	0	n/a	NegCtrl	NegCtrl|18	1|Neg_Control_Human_GA_0178|NegCtrl	NegCtrl	ACCGTCGCGGACATAGGGCTCTAAGTTTAAGAGCTATGCTGGAAACAGCATAGCAAGTTTAAATAAGGCTAGTCCGTTATCAACTTGAAAAAGTGGCACCGAGTCGGTGCTTTTTT
1|Neg_Control_Human_GA_0179|NegCtrl	AGCGCAGATAGCGCGTATCA	0	0	0	0	0	0	0	0	0	n/a	NegCtrl	NegCtrl|18	1|Neg_Control_Human_GA_0179|NegCtrl	NegCtrl	ACCGAGCGCAGATAGCGCGTATCAGTTTAAGAGCTATGCTGGAAACAGCATAGCAAGTTTAAATAAGGCTAGTCCGTTATCAACTTGAAAAAGTGGCACCGAGTCGGTGCTTTTTT
1|Neg_Control_Human_GA_0180|NegCtrl	GTTCGCTTCGTAACGAGGAA	0	0	0	0	0	0	0	0	0	n/a	NegCtrl	NegCtrl|18	1|Neg_Control_Human_GA_0180|NegCtrl	NegCtrl	ACCGGTTCGCTTCGTAACGAGGAAGTTTAAGAGCTATGCTGGAAACAGCATAGCAAGTTTAAATAAGGCTAGTCCGTTATCAACTTGAAAAAGTGGCACCGAGTCGGTGCTTTTTT
1|Neg_Control_Human_GA_0181|NegCtrl	GACCCCCGATAACTTTTGAC	0	0	0	0	0	0	0	0	0	n/a	NegCtrl	NegCtrl|19	1|Neg_Control_Human_GA_0181|NegCtrl	NegCtrl	ACCGGACCCCCGATAACTTTTGACGTTTAAGAGCTATGCTGGAAACAGCATAGCAAGTTTAAATAAGGCTAGTCCGTTATCAACTTGAAAAAGTGGCACCGAGTCGGTGCTTTTTT
1|Neg_Control_Human_GA_0182|NegCtrl	ACGTCCATACTGTCGGCTAC	0	0	0	0	0	0	0	0	0	n/a	NegCtrl	NegCtrl|19	1|Neg_Control_Human_GA_0182|NegCtrl	NegCtrl	ACCGACGTCCATACTGTCGGCTACGTTTAAGAGCTATGCTGGAAACAGCATAGCAAGTTTAAATAAGGCTAGTCCGTTATCAACTTGAAAAAGTGGCACCGAGTCGGTGCTTTTTT
1|Neg_Control_Human_GA_0183|NegCtrl	GTACCATTGCCGGCTCCCTA	0	0	0	0	0	0	0	0	1	n/a	NegCtrl	NegCtrl|19	1|Neg_Control_Human_GA_0183|NegCtrl	NegCtrl	ACCGGTACCATTGCCGGCTCCCTAGTTTAAGAGCTATGCTGGAAACAGCATAGCAAGTTTAAATAAGGCTAGTCCGTTATCAACTTGAAAAAGTGGCACCGAGTCGGTGCTTTTTT
1|Neg_Control_Human_GA_0184|NegCtrl	TGGTTCCGTAGGTCGGTATA	0	0	22481	1	0	1	1	1	0	n/a	NegCtrl	NegCtrl|19	1|Neg_Control_Human_GA_0184|NegCtrl	NegCtrl	ACCGTGGTTCCGTAGGTCGGTATAGTTTAAGAGCTATGCTGGAAACAGCATAGCAAGTTTAAATAAGGCTAGTCCGTTATCAACTTGAAAAAGTGGCACCGAGTCGGTGCTTTTTT
1|Neg_Control_Human_GA_0185|NegCtrl	TCTGGCTTGACACGACCGTT	0	0	0	0	0	0	0	0	0	n/a	NegCtrl	NegCtrl|19	1|Neg_Control_Human_GA_0185|NegCtrl	NegCtrl	ACCGTCTGGCTTGACACGACCGTTGTTTAAGAGCTATGCTGGAAACAGCATAGCAAGTTTAAATAAGGCTAGTCCGTTATCAACTTGAAAAAGTGGCACCGAGTCGGTGCTTTTTT
1|Neg_Control_Human_GA_0186|NegCtrl	CGCTAGGTCCGGTAAGTGCG	0	0	0	0	0	0	0	0	0	n/a	NegCtrl	NegCtrl|19	1|Neg_Control_Human_GA_0186|NegCtrl	NegCtrl	ACCGCGCTAGGTCCGGTAAGTGCGGTTTAAGAGCTATGCTGGAAACAGCATAGCAAGTTTAAATAAGGCTAGTCCGTTATCAACTTGAAAAAGTGGCACCGAGTCGGTGCTTTTTT
1|Neg_Control_Human_GA_0187|NegCtrl	AGCACGTAATGTCCGTGGAT	0	0	0	0	0	0	0	0	0	n/a	NegCtrl	NegCtrl|19	1|Neg_Control_Human_GA_0187|NegCtrl	NegCtrl	ACCGAGCACGTAATGTCCGTGGATGTTTAAGAGCTATGCTGGAAACAGCATAGCAAGTTTAAATAAGGCTAGTCCGTTATCAACTTGAAAAAGTGGCACCGAGTCGGTGCTTTTTT
1|Neg_Control_Human_GA_0188|NegCtrl	AAGGCGCGCGAATGTGGCAG	0	0	1	0	0	0	0	0	1	n/a	NegCtrl	NegCtrl|19	1|Neg_Control_Human_GA_0188|NegCtrl	NegCtrl	ACCGAAGGCGCGCGAATGTGGCAGGTTTAAGAGCTATGCTGGAAACAGCATAGCAAGTTTAAATAAGGCTAGTCCGTTATCAACTTGAAAAAGTGGCACCGAGTCGGTGCTTTTTT
1|Neg_Control_Human_GA_0189|NegCtrl	ACTGCGGAGCGCCCAATATC	0	0	0	0	0	0	0	0	0	n/a	NegCtrl	NegCtrl|19	1|Neg_Control_Human_GA_0189|NegCtrl	NegCtrl	ACCGACTGCGGAGCGCCCAATATCGTTTAAGAGCTATGCTGGAAACAGCATAGCAAGTTTAAATAAGGCTAGTCCGTTATCAACTTGAAAAAGTGGCACCGAGTCGGTGCTTTTTT
1|Neg_Control_Human_GA_0190|NegCtrl	CGTCGAGTGCTCGAACTCCA	0	0	0	0	0	0	0	0	0	n/a	NegCtrl	NegCtrl|19	1|Neg_Control_Human_GA_0190|NegCtrl	NegCtrl	ACCGCGTCGAGTGCTCGAACTCCAGTTTAAGAGCTATGCTGGAAACAGCATAGCAAGTTTAAATAAGGCTAGTCCGTTATCAACTTGAAAAAGTGGCACCGAGTCGGTGCTTTTTT
1|Neg_Control_Human_GA_0191|NegCtrl	TCGCAGCGGCGTGGGATCGG	0	0	0	0	0	0	0	0	0	n/a	NegCtrl	NegCtrl|20	1|Neg_Control_Human_GA_0191|NegCtrl	NegCtrl	ACCGTCGCAGCGGCGTGGGATCGGGTTTAAGAGCTATGCTGGAAACAGCATAGCAAGTTTAAATAAGGCTAGTCCGTTATCAACTTGAAAAAGTGGCACCGAGTCGGTGCTTTTTT
1|Neg_Control_Human_GA_0192|NegCtrl	ATCTGTCCTAATTCGGATCG	0	0	0	0	0	0	0	0	0	n/a	NegCtrl	NegCtrl|20	1|Neg_Control_Human_GA_0192|NegCtrl	NegCtrl	ACCGATCTGTCCTAATTCGGATCGGTTTAAGAGCTATGCTGGAAACAGCATAGCAAGTTTAAATAAGGCTAGTCCGTTATCAACTTGAAAAAGTGGCACCGAGTCGGTGCTTTTTT
1|Neg_Control_Human_GA_0193|NegCtrl	TGCGGCGTAATGCTTGAAAG	2	0	0	0	0	2	0	5149	0	n/a	NegCtrl	NegCtrl|20	1|Neg_Control_Human_GA_0193|NegCtrl	NegCtrl	ACCGTGCGGCGTAATGCTTGAAAGGTTTAAGAGCTATGCTGGAAACAGCATAGCAAGTTTAAATAAGGCTAGTCCGTTATCAACTTGAAAAAGTGGCACCGAGTCGGTGCTTTTTT
1|Neg_Control_Human_GA_0194|NegCtrl	CGAACTTAATCCCGTGGCAA	0	0	0	0	0	0	0	0	0	n/a	NegCtrl	NegCtrl|20	1|Neg_Control_Human_GA_0194|NegCtrl	NegCtrl	ACCGCGAACTTAATCCCGTGGCAAGTTTAAGAGCTATGCTGGAAACAGCATAGCAAGTTTAAATAAGGCTAGTCCGTTATCAACTTGAAAAAGTGGCACCGAGTCGGTGCTTTTTT
1|Neg_Control_Human_GA_0195|NegCtrl	GCCGTGTTGCTGGATACGCC	0	0	0	0	0	0	0	0	0	n/a	NegCtrl	NegCtrl|20	1|Neg_Control_Human_GA_0195|NegCtrl	NegCtrl	ACCGGCCGTGTTGCTGGATACGCCGTTTAAGAGCTATGCTGGAAACAGCATAGCAAGTTTAAATAAGGCTAGTCCGTTATCAACTTGAAAAAGTGGCACCGAGTCGGTGCTTTTTT
1|Neg_Control_Human_GA_0196|NegCtrl	TACCCTCCGGATACGGACTG	0	0	0	0	0	0	0	0	0	n/a	NegCtrl	NegCtrl|20	1|Neg_Control_Human_GA_0196|NegCtrl	NegCtrl	ACCGTACCCTCCGGATACGGACTGGTTTAAGAGCTATGCTGGAAACAGCATAGCAAGTTTAAATAAGGCTAGTCCGTTATCAACTTGAAAAAGTGGCACCGAGTCGGTGCTTTTTT
1|Neg_Control_Human_GA_0197|NegCtrl	CCGTTGGACTATGGCGGGTC	0	0	0	0	0	0	0	0	0	n/a	NegCtrl	NegCtrl|20	1|Neg_Control_Human_GA_0197|NegCtrl	NegCtrl	ACCGCCGTTGGACTATGGCGGGTCGTTTAAGAGCTATGCTGGAAACAGCATAGCAAGTTTAAATAAGGCTAGTCCGTTATCAACTTGAAAAAGTGGCACCGAGTCGGTGCTTTTTT
1|Neg_Control_Human_GA_0198|NegCtrl	GTACGGGGCGATCATCCACA	1	0	1	0	0	1	0	6768	0	n/a	NegCtrl	NegCtrl|20	1|Neg_Control_Human_GA_0198|NegCtrl	NegCtrl	ACCGGTACGGGGCGATCATCCACAGTTTAAGAGCTATGCTGGAAACAGCATAGCAAGTTTAAATAAGGCTAGTCCGTTATCAACTTGAAAAAGTGGCACCGAGTCGGTGCTTTTTT
1|Neg_Control_Human_GA_0199|NegCtrl	AAGAGTAGTAGACGCCCGGG	0	0	0	0	0	0	0	0	0	n/a	NegCtrl	NegCtrl|20	1|Neg_Control_Human_GA_0199|NegCtrl	NegCtrl	ACCGAAGAGTAGTAGACGCCCGGGGTTTAAGAGCTATGCTGGAAACAGCATAGCAAGTTTAAATAAGGCTAGTCCGTTATCAACTTGAAAAAGTGGCACCGAGTCGGTGCTTTTTT
1|Neg_Control_Human_GA_0200|NegCtrl	AAGAGCGAATCGATTTCGTG	0	0	0	0	0	0	0	0	0	n/a	NegCtrl	NegCtrl|20	1|Neg_Control_Human_GA_0200|NegCtrl	NegCtrl	ACCGAAGAGCGAATCGATTTCGTGGTTTAAGAGCTATGCTGGAAACAGCATAGCAAGTTTAAATAAGGCTAGTCCGTTATCAACTTGAAAAAGTGGCACCGAGTCGGTGCTTTTTT
1|Neg_Control_Human_GA_0201|NegCtrl	CGGCTCGTTCTACGCACTGA	0	0	0	0	0	0	0	0	0	n/a	NegCtrl	NegCtrl|21	1|Neg_Control_Human_GA_0201|NegCtrl	NegCtrl	ACCGCGGCTCGTTCTACGCACTGAGTTTAAGAGCTATGCTGGAAACAGCATAGCAAGTTTAAATAAGGCTAGTCCGTTATCAACTTGAAAAAGTGGCACCGAGTCGGTGCTTTTTT
1|Neg_Control_Human_GA_0202|NegCtrl	TCCAGCGCGAGCTTACTCGT	1	0	0	1	1	0	0	6087	0	n/a	NegCtrl	NegCtrl|21	1|Neg_Control_Human_GA_0202|NegCtrl	NegCtrl	ACCGTCCAGCGCGAGCTTACTCGTGTTTAAGAGCTATGCTGGAAACAGCATAGCAAGTTTAAATAAGGCTAGTCCGTTATCAACTTGAAAAAGTGGCACCGAGTCGGTGCTTTTTT
1|Neg_Control_Human_GA_0203|NegCtrl	GGAGTGGTCCCGTACGCAAC	0	0	0	0	0	0	0	0	0	n/a	NegCtrl	NegCtrl|21	1|Neg_Control_Human_GA_0203|NegCtrl	NegCtrl	ACCGGGAGTGGTCCCGTACGCAACGTTTAAGAGCTATGCTGGAAACAGCATAGCAAGTTTAAATAAGGCTAGTCCGTTATCAACTTGAAAAAGTGGCACCGAGTCGGTGCTTTTTT
1|Neg_Control_Human_GA_0204|NegCtrl	CAAGACCTTATCGTGCAGCG	0	30279	0	0	0	0	1	0	0	n/a	NegCtrl	NegCtrl|21	1|Neg_Control_Human_GA_0204|NegCtrl	NegCtrl	ACCGCAAGACCTTATCGTGCAGCGGTTTAAGAGCTATGCTGGAAACAGCATAGCAAGTTTAAATAAGGCTAGTCCGTTATCAACTTGAAAAAGTGGCACCGAGTCGGTGCTTTTTT
1|Neg_Control_Human_GA_0205|NegCtrl	ACGTCGTTTAGCACCCGGCT	0	0	0	0	0	0	0	0	0	n/a	NegCtrl	NegCtrl|21	1|Neg_Control_Human_GA_0205|NegCtrl	NegCtrl	ACCGACGTCGTTTAGCACCCGGCTGTTTAAGAGCTATGCTGGAAACAGCATAGCAAGTTTAAATAAGGCTAGTCCGTTATCAACTTGAAAAAGTGGCACCGAGTCGGTGCTTTTTT
1|Neg_Control_Human_GA_0206|NegCtrl	TTTCAGGCTACGGGCGCGGG	0	0	0	0	0	0	0	0	0	n/a	NegCtrl	NegCtrl|21	1|Neg_Control_Human_GA_0206|NegCtrl	NegCtrl	ACCGTTTCAGGCTACGGGCGCGGGGTTTAAGAGCTATGCTGGAAACAGCATAGCAAGTTTAAATAAGGCTAGTCCGTTATCAACTTGAAAAAGTGGCACCGAGTCGGTGCTTTTTT
1|Neg_Control_Human_GA_0207|NegCtrl	CAATCGGCGACGTTTTAAAT	1	1	2	0	1	2	1	17215	1	n/a	NegCtrl	NegCtrl|21	1|Neg_Control_Human_GA_0207|NegCtrl	NegCtrl	ACCGCAATCGGCGACGTTTTAAATGTTTAAGAGCTATGCTGGAAACAGCATAGCAAGTTTAAATAAGGCTAGTCCGTTATCAACTTGAAAAAGTGGCACCGAGTCGGTGCTTTTTT
1|Neg_Control_Human_GA_0208|NegCtrl	GTACCCCTATGGCCGTTCTA	0	0	0	0	0	0	0	0	0	n/a	NegCtrl	NegCtrl|21	1|Neg_Control_Human_GA_0208|NegCtrl	NegCtrl	ACCGGTACCCCTATGGCCGTTCTAGTTTAAGAGCTATGCTGGAAACAGCATAGCAAGTTTAAATAAGGCTAGTCCGTTATCAACTTGAAAAAGTGGCACCGAGTCGGTGCTTTTTT
1|Neg_Control_Human_GA_0209|NegCtrl	TACCCACGCGTATTCCATCT	0	0	0	0	0	0	0	0	0	n/a	NegCtrl	NegCtrl|21	1|Neg_Control_Human_GA_0209|NegCtrl	NegCtrl	ACCGTACCCACGCGTATTCCATCTGTTTAAGAGCTATGCTGGAAACAGCATAGCAAGTTTAAATAAGGCTAGTCCGTTATCAACTTGAAAAAGTGGCACCGAGTCGGTGCTTTTTT
1|Neg_Control_Human_GA_0210|NegCtrl	CTTGTTGCGTATACGAGACT	0	0	0	0	0	0	0	0	0	n/a	NegCtrl	NegCtrl|21	1|Neg_Control_Human_GA_0210|NegCtrl	NegCtrl	ACCGCTTGTTGCGTATACGAGACTGTTTAAGAGCTATGCTGGAAACAGCATAGCAAGTTTAAATAAGGCTAGTCCGTTATCAACTTGAAAAAGTGGCACCGAGTCGGTGCTTTTTT
1|Neg_Control_Human_GA_0211|NegCtrl	GAACGCCGCTCAAGTTGATA	0	0	0	0	0	0	0	0	0	n/a	NegCtrl	NegCtrl|22	1|Neg_Control_Human_GA_0211|NegCtrl	NegCtrl	ACCGGAACGCCGCTCAAGTTGATAGTTTAAGAGCTATGCTGGAAACAGCATAGCAAGTTTAAATAAGGCTAGTCCGTTATCAACTTGAAAAAGTGGCACCGAGTCGGTGCTTTTTT
1|Neg_Control_Human_GA_0212|NegCtrl	CGCAGTACGTATAGACTTAA	0	2	22899	0	0	1	0	0	0	n/a	NegCtrl	NegCtrl|22	1|Neg_Control_Human_GA_0212|NegCtrl	NegCtrl	ACCGCGCAGTACGTATAGACTTAAGTTTAAGAGCTATGCTGGAAACAGCATAGCAAGTTTAAATAAGGCTAGTCCGTTATCAACTTGAAAAAGTGGCACCGAGTCGGTGCTTTTTT
1|Neg_Control_Human_GA_0213|NegCtrl	GCGAACCCCGTAGCCAGGCT	0	0	0	0	0	0	0	0	0	n/a	NegCtrl	NegCtrl|22	1|Neg_Control_Human_GA_0213|NegCtrl	NegCtrl	ACCGGCGAACCCCGTAGCCAGGCTGTTTAAGAGCTATGCTGGAAACAGCATAGCAAGTTTAAATAAGGCTAGTCCGTTATCAACTTGAAAAAGTGGCACCGAGTCGGTGCTTTTTT
1|Neg_Control_Human_GA_0214|NegCtrl	CCTCGGGCGTAAATACTCAT	0	0	0	0	0	0	0	0	0	n/a	NegCtrl	NegCtrl|22	1|Neg_Control_Human_GA_0214|NegCtrl	NegCtrl	ACCGCCTCGGGCGTAAATACTCATGTTTAAGAGCTATGCTGGAAACAGCATAGCAAGTTTAAATAAGGCTAGTCCGTTATCAACTTGAAAAAGTGGCACCGAGTCGGTGCTTTTTT
1|Neg_Control_Human_GA_0215|NegCtrl	AGGGCACCCGGTTCATACGC	0	0	0	0	0	0	0	0	0	n/a	NegCtrl	NegCtrl|22	1|Neg_Control_Human_GA_0215|NegCtrl	NegCtrl	ACCGAGGGCACCCGGTTCATACGCGTTTAAGAGCTATGCTGGAAACAGCATAGCAAGTTTAAATAAGGCTAGTCCGTTATCAACTTGAAAAAGTGGCACCGAGTCGGTGCTTTTTT
1|Neg_Control_Human_GA_0216|NegCtrl	CACGGCCTAACTTGCTGATA	0	0	0	0	0	0	0	0	0	n/a	NegCtrl	NegCtrl|22	1|Neg_Control_Human_GA_0216|NegCtrl	NegCtrl	ACCGCACGGCCTAACTTGCTGATAGTTTAAGAGCTATGCTGGAAACAGCATAGCAAGTTTAAATAAGGCTAGTCCGTTATCAACTTGAAAAAGTGGCACCGAGTCGGTGCTTTTTT
1|Neg_Control_Human_GA_0217|NegCtrl	CCGGGAGATTAACGTTAATT	0	0	0	0	0	0	0	0	0	n/a	NegCtrl	NegCtrl|22	1|Neg_Control_Human_GA_0217|NegCtrl	NegCtrl	ACCGCCGGGAGATTAACGTTAATTGTTTAAGAGCTATGCTGGAAACAGCATAGCAAGTTTAAATAAGGCTAGTCCGTTATCAACTTGAAAAAGTGGCACCGAGTCGGTGCTTTTTT
1|Neg_Control_Human_GA_0218|NegCtrl	ATCTCGGGTCGACTGCGGAT	0	0	0	0	0	0	0	0	0	n/a	NegCtrl	NegCtrl|22	1|Neg_Control_Human_GA_0218|NegCtrl	NegCtrl	ACCGATCTCGGGTCGACTGCGGATGTTTAAGAGCTATGCTGGAAACAGCATAGCAAGTTTAAATAAGGCTAGTCCGTTATCAACTTGAAAAAGTGGCACCGAGTCGGTGCTTTTTT
1|Neg_Control_Human_GA_0219|NegCtrl	CGCCGGGACCGTTAGGGAAT	0	0	0	0	0	0	0	0	0	n/a	NegCtrl	NegCtrl|22	1|Neg_Control_Human_GA_0219|NegCtrl	NegCtrl	ACCGCGCCGGGACCGTTAGGGAATGTTTAAGAGCTATGCTGGAAACAGCATAGCAAGTTTAAATAAGGCTAGTCCGTTATCAACTTGAAAAAGTGGCACCGAGTCGGTGCTTTTTT
1|Neg_Control_Human_GA_0220|NegCtrl	GCAAACCCGAGTGACACGTC	0	0	0	0	0	0	0	0	0	n/a	NegCtrl	NegCtrl|22	1|Neg_Control_Human_GA_0220|NegCtrl	NegCtrl	ACCGGCAAACCCGAGTGACACGTCGTTTAAGAGCTATGCTGGAAACAGCATAGCAAGTTTAAATAAGGCTAGTCCGTTATCAACTTGAAAAAGTGGCACCGAGTCGGTGCTTTTTT
1|Neg_Control_Human_GA_0221|NegCtrl	GTGCGTGAGTATTAACGCTC	0	0	0	0	0	0	0	0	0	n/a	NegCtrl	NegCtrl|23	1|Neg_Control_Human_GA_0221|NegCtrl	NegCtrl	ACCGGTGCGTGAGTATTAACGCTCGTTTAAGAGCTATGCTGGAAACAGCATAGCAAGTTTAAATAAGGCTAGTCCGTTATCAACTTGAAAAAGTGGCACCGAGTCGGTGCTTTTTT
1|Neg_Control_Human_GA_0222|NegCtrl	GCTTAACCTATCCGCCAGTA	0	0	0	0	0	0	0	0	0	n/a	NegCtrl	NegCtrl|23	1|Neg_Control_Human_GA_0222|NegCtrl	NegCtrl	ACCGGCTTAACCTATCCGCCAGTAGTTTAAGAGCTATGCTGGAAACAGCATAGCAAGTTTAAATAAGGCTAGTCCGTTATCAACTTGAAAAAGTGGCACCGAGTCGGTGCTTTTTT
1|Neg_Control_Human_GA_0223|NegCtrl	TGGCCACGAATTCCGCCGCC	0	0	0	0	0	0	0	0	0	n/a	NegCtrl	NegCtrl|23	1|Neg_Control_Human_GA_0223|NegCtrl	NegCtrl	ACCGTGGCCACGAATTCCGCCGCCGTTTAAGAGCTATGCTGGAAACAGCATAGCAAGTTTAAATAAGGCTAGTCCGTTATCAACTTGAAAAAGTGGCACCGAGTCGGTGCTTTTTT
1|Neg_Control_Human_GA_0224|NegCtrl	GTAAGGCCCGCGTACGAGCT	0	0	0	0	0	0	0	0	0	n/a	NegCtrl	NegCtrl|23	1|Neg_Control_Human_GA_0224|NegCtrl	NegCtrl	ACCGGTAAGGCCCGCGTACGAGCTGTTTAAGAGCTATGCTGGAAACAGCATAGCAAGTTTAAATAAGGCTAGTCCGTTATCAACTTGAAAAAGTGGCACCGAGTCGGTGCTTTTTT
1|Neg_Control_Human_GA_0225|NegCtrl	CTCCTTACGTCGGGCATTAA	0	0	0	0	0	0	0	0	0	n/a	NegCtrl	NegCtrl|23	1|Neg_Control_Human_GA_0225|NegCtrl	NegCtrl	ACCGCTCCTTACGTCGGGCATTAAGTTTAAGAGCTATGCTGGAAACAGCATAGCAAGTTTAAATAAGGCTAGTCCGTTATCAACTTGAAAAAGTGGCACCGAGTCGGTGCTTTTTT
1|Neg_Control_Human_GA_0226|NegCtrl	ATTCCTTCGGCGCTCTGCGT	0	0	0	0	0	0	0	0	1	n/a	NegCtrl	NegCtrl|23	1|Neg_Control_Human_GA_0226|NegCtrl	NegCtrl	ACCGATTCCTTCGGCGCTCTGCGTGTTTAAGAGCTATGCTGGAAACAGCATAGCAAGTTTAAATAAGGCTAGTCCGTTATCAACTTGAAAAAGTGGCACCGAGTCGGTGCTTTTTT
1|Neg_Control_Human_GA_0227|NegCtrl	ATGCGCTTTAATCGCCGTTC	0	0	0	0	0	0	0	0	0	n/a	NegCtrl	NegCtrl|23	1|Neg_Control_Human_GA_0227|NegCtrl	NegCtrl	ACCGATGCGCTTTAATCGCCGTTCGTTTAAGAGCTATGCTGGAAACAGCATAGCAAGTTTAAATAAGGCTAGTCCGTTATCAACTTGAAAAAGTGGCACCGAGTCGGTGCTTTTTT
1|Neg_Control_Human_GA_0228|NegCtrl	TTAGCCCTCGATTGGTTGCG	0	0	0	0	0	0	0	0	0	n/a	NegCtrl	NegCtrl|23	1|Neg_Control_Human_GA_0228|NegCtrl	NegCtrl	ACCGTTAGCCCTCGATTGGTTGCGGTTTAAGAGCTATGCTGGAAACAGCATAGCAAGTTTAAATAAGGCTAGTCCGTTATCAACTTGAAAAAGTGGCACCGAGTCGGTGCTTTTTT
1|Neg_Control_Human_GA_0229|NegCtrl	AACGCTGTCGTACGTGTATA	0	0	0	0	0	0	0	0	0	n/a	NegCtrl	NegCtrl|23	1|Neg_Control_Human_GA_0229|NegCtrl	NegCtrl	ACCGAACGCTGTCGTACGTGTATAGTTTAAGAGCTATGCTGGAAACAGCATAGCAAGTTTAAATAAGGCTAGTCCGTTATCAACTTGAAAAAGTGGCACCGAGTCGGTGCTTTTTT
1|Neg_Control_Human_GA_0230|NegCtrl	TAACGCGCATATCTGAACAC	0	0	0	0	0	0	0	0	0	n/a	NegCtrl	NegCtrl|23	1|Neg_Control_Human_GA_0230|NegCtrl	NegCtrl	ACCGTAACGCGCATATCTGAACACGTTTAAGAGCTATGCTGGAAACAGCATAGCAAGTTTAAATAAGGCTAGTCCGTTATCAACTTGAAAAAGTGGCACCGAGTCGGTGCTTTTTT
1|Neg_Control_Human_GA_0231|NegCtrl	CGCTAGGTTATTTCGTGGCC	0	0	0	0	0	0	0	0	0	n/a	NegCtrl	NegCtrl|24	1|Neg_Control_Human_GA_0231|NegCtrl	NegCtrl	ACCGCGCTAGGTTATTTCGTGGCCGTTTAAGAGCTATGCTGGAAACAGCATAGCAAGTTTAAATAAGGCTAGTCCGTTATCAACTTGAAAAAGTGGCACCGAGTCGGTGCTTTTTT
1|Neg_Control_Human_GA_0232|NegCtrl	AATATTTGGCTCGGCTGCGC	0	0	0	0	0	0	0	0	0	n/a	NegCtrl	NegCtrl|24	1|Neg_Control_Human_GA_0232|NegCtrl	NegCtrl	ACCGAATATTTGGCTCGGCTGCGCGTTTAAGAGCTATGCTGGAAACAGCATAGCAAGTTTAAATAAGGCTAGTCCGTTATCAACTTGAAAAAGTGGCACCGAGTCGGTGCTTTTTT
1|Neg_Control_Human_GA_0233|NegCtrl	CAATATCGGGTGCTACAGGA	0	0	0	0	0	0	0	0	0	n/a	NegCtrl	NegCtrl|24	1|Neg_Control_Human_GA_0233|NegCtrl	NegCtrl	ACCGCAATATCGGGTGCTACAGGAGTTTAAGAGCTATGCTGGAAACAGCATAGCAAGTTTAAATAAGGCTAGTCCGTTATCAACTTGAAAAAGTGGCACCGAGTCGGTGCTTTTTT
1|Neg_Control_Human_GA_0234|NegCtrl	CGGCCGCATCCTGTTATATT	0	0	0	0	0	0	0	0	0	n/a	NegCtrl	NegCtrl|24	1|Neg_Control_Human_GA_0234|NegCtrl	NegCtrl	ACCGCGGCCGCATCCTGTTATATTGTTTAAGAGCTATGCTGGAAACAGCATAGCAAGTTTAAATAAGGCTAGTCCGTTATCAACTTGAAAAAGTGGCACCGAGTCGGTGCTTTTTT
1|Neg_Control_Human_GA_0235|NegCtrl	CTGGATCGCCCGCAGAAATA	83450	0	0	0	1	1	0	12	2	n/a	NegCtrl	NegCtrl|24	1|Neg_Control_Human_GA_0235|NegCtrl	NegCtrl	ACCGCTGGATCGCCCGCAGAAATAGTTTAAGAGCTATGCTGGAAACAGCATAGCAAGTTTAAATAAGGCTAGTCCGTTATCAACTTGAAAAAGTGGCACCGAGTCGGTGCTTTTTT
1|Neg_Control_Human_GA_0236|NegCtrl	ATTAGCACGGCGACCTTCTA	0	0	0	0	0	0	0	0	0	n/a	NegCtrl	NegCtrl|24	1|Neg_Control_Human_GA_0236|NegCtrl	NegCtrl	ACCGATTAGCACGGCGACCTTCTAGTTTAAGAGCTATGCTGGAAACAGCATAGCAAGTTTAAATAAGGCTAGTCCGTTATCAACTTGAAAAAGTGGCACCGAGTCGGTGCTTTTTT
1|Neg_Control_Human_GA_0237|NegCtrl	TGGAAATCGACTGTGCGCTT	0	0	0	0	0	0	0	0	0	n/a	NegCtrl	NegCtrl|24	1|Neg_Control_Human_GA_0237|NegCtrl	NegCtrl	ACCGTGGAAATCGACTGTGCGCTTGTTTAAGAGCTATGCTGGAAACAGCATAGCAAGTTTAAATAAGGCTAGTCCGTTATCAACTTGAAAAAGTGGCACCGAGTCGGTGCTTTTTT
1|Neg_Control_Human_GA_0238|NegCtrl	ATTAGCCGTTGCCATATCAA	0	0	0	0	0	0	0	0	0	n/a	NegCtrl	NegCtrl|24	1|Neg_Control_Human_GA_0238|NegCtrl	NegCtrl	ACCGATTAGCCGTTGCCATATCAAGTTTAAGAGCTATGCTGGAAACAGCATAGCAAGTTTAAATAAGGCTAGTCCGTTATCAACTTGAAAAAGTGGCACCGAGTCGGTGCTTTTTT
1|Neg_Control_Human_GA_0239|NegCtrl	ACCCGATAATAGCTACTGGT	0	0	0	0	0	0	0	0	0	n/a	NegCtrl	NegCtrl|24	1|Neg_Control_Human_GA_0239|NegCtrl	NegCtrl	ACCGACCCGATAATAGCTACTGGTGTTTAAGAGCTATGCTGGAAACAGCATAGCAAGTTTAAATAAGGCTAGTCCGTTATCAACTTGAAAAAGTGGCACCGAGTCGGTGCTTTTTT
1|Neg_Control_Human_GA_0240|NegCtrl	ATTCAGCGCGCTCGCCCTGG	0	0	0	0	0	0	0	0	0	n/a	NegCtrl	NegCtrl|24	1|Neg_Control_Human_GA_0240|NegCtrl	NegCtrl	ACCGATTCAGCGCGCTCGCCCTGGGTTTAAGAGCTATGCTGGAAACAGCATAGCAAGTTTAAATAAGGCTAGTCCGTTATCAACTTGAAAAAGTGGCACCGAGTCGGTGCTTTTTT
1|Neg_Control_Human_GA_0241|NegCtrl	TGCCGTGAAAAGACGCTGCG	0	0	0	0	1	0	0	0	0	n/a	NegCtrl	NegCtrl|25	1|Neg_Control_Human_GA_0241|NegCtrl	NegCtrl	ACCGTGCCGTGAAAAGACGCTGCGGTTTAAGAGCTATGCTGGAAACAGCATAGCAAGTTTAAATAAGGCTAGTCCGTTATCAACTTGAAAAAGTGGCACCGAGTCGGTGCTTTTTT
1|Neg_Control_Human_GA_0242|NegCtrl	CTTACGCGCCTGGTCAAAAG	0	0	0	0	0	0	0	0	0	n/a	NegCtrl	NegCtrl|25	1|Neg_Control_Human_GA_0242|NegCtrl	NegCtrl	ACCGCTTACGCGCCTGGTCAAAAGGTTTAAGAGCTATGCTGGAAACAGCATAGCAAGTTTAAATAAGGCTAGTCCGTTATCAACTTGAAAAAGTGGCACCGAGTCGGTGCTTTTTT
1|Neg_Control_Human_GA_0243|NegCtrl	CGCATAAGTCGATAGACACA	0	0	0	0	0	0	0	0	0	n/a	NegCtrl	NegCtrl|25	1|Neg_Control_Human_GA_0243|NegCtrl	NegCtrl	ACCGCGCATAAGTCGATAGACACAGTTTAAGAGCTATGCTGGAAACAGCATAGCAAGTTTAAATAAGGCTAGTCCGTTATCAACTTGAAAAAGTGGCACCGAGTCGGTGCTTTTTT
1|Neg_Control_Human_GA_0244|NegCtrl	GTCATCAGCGATTTGACGAG	0	29091	0	2	0	1	0	0	3	n/a	NegCtrl	NegCtrl|25	1|Neg_Control_Human_GA_0244|NegCtrl	NegCtrl	ACCGGTCATCAGCGATTTGACGAGGTTTAAGAGCTATGCTGGAAACAGCATAGCAAGTTTAAATAAGGCTAGTCCGTTATCAACTTGAAAAAGTGGCACCGAGTCGGTGCTTTTTT
1|Neg_Control_Human_GA_0245|NegCtrl	CGAATCGGAACTTTGTACCG	0	0	1	16435	1	0	8	0	0	n/a	NegCtrl	NegCtrl|25	1|Neg_Control_Human_GA_0245|NegCtrl	NegCtrl	ACCGCGAATCGGAACTTTGTACCGGTTTAAGAGCTATGCTGGAAACAGCATAGCAAGTTTAAATAAGGCTAGTCCGTTATCAACTTGAAAAAGTGGCACCGAGTCGGTGCTTTTTT
1|Neg_Control_Human_GA_0246|NegCtrl	AGGTCAAGCCGACCTCGAAC	0	0	0	0	0	0	0	0	0	n/a	NegCtrl	NegCtrl|25	1|Neg_Control_Human_GA_0246|NegCtrl	NegCtrl	ACCGAGGTCAAGCCGACCTCGAACGTTTAAGAGCTATGCTGGAAACAGCATAGCAAGTTTAAATAAGGCTAGTCCGTTATCAACTTGAAAAAGTGGCACCGAGTCGGTGCTTTTTT
1|Neg_Control_Human_GA_0247|NegCtrl	TGCGCCTTACTCGTTAACTG	0	0	0	0	0	0	0	0	0	n/a	NegCtrl	NegCtrl|25	1|Neg_Control_Human_GA_0247|NegCtrl	NegCtrl	ACCGTGCGCCTTACTCGTTAACTGGTTTAAGAGCTATGCTGGAAACAGCATAGCAAGTTTAAATAAGGCTAGTCCGTTATCAACTTGAAAAAGTGGCACCGAGTCGGTGCTTTTTT
1|Neg_Control_Human_GA_0248|NegCtrl	ATCTGAGCGTTTTCGGCCGC	0	0	0	0	0	0	0	0	0	n/a	NegCtrl	NegCtrl|25	1|Neg_Control_Human_GA_0248|NegCtrl	NegCtrl	ACCGATCTGAGCGTTTTCGGCCGCGTTTAAGAGCTATGCTGGAAACAGCATAGCAAGTTTAAATAAGGCTAGTCCGTTATCAACTTGAAAAAGTGGCACCGAGTCGGTGCTTTTTT
1|Neg_Control_Human_GA_0249|NegCtrl	ACGGTACATGCGCATGAGTC	0	0	0	0	0	0	0	0	0	n/a	NegCtrl	NegCtrl|25	1|Neg_Control_Human_GA_0249|NegCtrl	NegCtrl	ACCGACGGTACATGCGCATGAGTCGTTTAAGAGCTATGCTGGAAACAGCATAGCAAGTTTAAATAAGGCTAGTCCGTTATCAACTTGAAAAAGTGGCACCGAGTCGGTGCTTTTTT
1|Neg_Control_Human_GA_0250|NegCtrl	TGACGCGATAGAGTTGGCTT	0	0	0	0	0	0	0	0	0	n/a	NegCtrl	NegCtrl|25	1|Neg_Control_Human_GA_0250|NegCtrl	NegCtrl	ACCGTGACGCGATAGAGTTGGCTTGTTTAAGAGCTATGCTGGAAACAGCATAGCAAGTTTAAATAAGGCTAGTCCGTTATCAACTTGAAAAAGTGGCACCGAGTCGGTGCTTTTTT
1|Neg_Control_Human_GA_0251|NegCtrl	TTCACCGTCCACGTGCGCAT	0	0	0	0	0	0	0	0	0	n/a	NegCtrl	NegCtrl|26	1|Neg_Control_Human_GA_0251|NegCtrl	NegCtrl	ACCGTTCACCGTCCACGTGCGCATGTTTAAGAGCTATGCTGGAAACAGCATAGCAAGTTTAAATAAGGCTAGTCCGTTATCAACTTGAAAAAGTGGCACCGAGTCGGTGCTTTTTT
1|Neg_Control_Human_GA_0252|NegCtrl	TTCTTCGGCCTACACCCGGT	0	51460	1	4	0	0	1	2	8	n/a	NegCtrl	NegCtrl|26	1|Neg_Control_Human_GA_0252|NegCtrl	NegCtrl	ACCGTTCTTCGGCCTACACCCGGTGTTTAAGAGCTATGCTGGAAACAGCATAGCAAGTTTAAATAAGGCTAGTCCGTTATCAACTTGAAAAAGTGGCACCGAGTCGGTGCTTTTTT
1|Neg_Control_Human_GA_0253|NegCtrl	GGAATTACGACTAACCGATT	6	0	1	1	0	2	1	35658	1	n/a	NegCtrl	NegCtrl|26	1|Neg_Control_Human_GA_0253|NegCtrl	NegCtrl	ACCGGGAATTACGACTAACCGATTGTTTAAGAGCTATGCTGGAAACAGCATAGCAAGTTTAAATAAGGCTAGTCCGTTATCAACTTGAAAAAGTGGCACCGAGTCGGTGCTTTTTT
1|Neg_Control_Human_GA_0254|NegCtrl	TGCGGGGAGCTCTCTTAATG	0	0	0	0	0	0	0	0	0	n/a	NegCtrl	NegCtrl|26	1|Neg_Control_Human_GA_0254|NegCtrl	NegCtrl	ACCGTGCGGGGAGCTCTCTTAATGGTTTAAGAGCTATGCTGGAAACAGCATAGCAAGTTTAAATAAGGCTAGTCCGTTATCAACTTGAAAAAGTGGCACCGAGTCGGTGCTTTTTT
1|Neg_Control_Human_GA_0255|NegCtrl	TAGAGATATCCGATCGTGGT	0	0	0	0	0	0	0	0	0	n/a	NegCtrl	NegCtrl|26	1|Neg_Control_Human_GA_0255|NegCtrl	NegCtrl	ACCGTAGAGATATCCGATCGTGGTGTTTAAGAGCTATGCTGGAAACAGCATAGCAAGTTTAAATAAGGCTAGTCCGTTATCAACTTGAAAAAGTGGCACCGAGTCGGTGCTTTTTT
1|Neg_Control_Human_GA_0256|NegCtrl	GGGTGCCCACTAATAGCCGC	0	0	0	0	0	0	2	0	0	n/a	NegCtrl	NegCtrl|26	1|Neg_Control_Human_GA_0256|NegCtrl	NegCtrl	ACCGGGGTGCCCACTAATAGCCGCGTTTAAGAGCTATGCTGGAAACAGCATAGCAAGTTTAAATAAGGCTAGTCCGTTATCAACTTGAAAAAGTGGCACCGAGTCGGTGCTTTTTT
1|Neg_Control_Human_GA_0257|NegCtrl	TGCAGTCGCGCTGAGCGTCA	0	25745	0	1	0	4	0	0	2	n/a	NegCtrl	NegCtrl|26	1|Neg_Control_Human_GA_0257|NegCtrl	NegCtrl	ACCGTGCAGTCGCGCTGAGCGTCAGTTTAAGAGCTATGCTGGAAACAGCATAGCAAGTTTAAATAAGGCTAGTCCGTTATCAACTTGAAAAAGTGGCACCGAGTCGGTGCTTTTTT
1|Neg_Control_Human_GA_0258|NegCtrl	GGATTGAATGGCTAACGCGG	0	0	0	0	0	0	0	0	0	n/a	NegCtrl	NegCtrl|26	1|Neg_Control_Human_GA_0258|NegCtrl	NegCtrl	ACCGGGATTGAATGGCTAACGCGGGTTTAAGAGCTATGCTGGAAACAGCATAGCAAGTTTAAATAAGGCTAGTCCGTTATCAACTTGAAAAAGTGGCACCGAGTCGGTGCTTTTTT
1|Neg_Control_Human_GA_0259|NegCtrl	GCGGTTCCGGGAGCACATTT	0	0	0	0	0	0	0	0	0	n/a	NegCtrl	NegCtrl|26	1|Neg_Control_Human_GA_0259|NegCtrl	NegCtrl	ACCGGCGGTTCCGGGAGCACATTTGTTTAAGAGCTATGCTGGAAACAGCATAGCAAGTTTAAATAAGGCTAGTCCGTTATCAACTTGAAAAAGTGGCACCGAGTCGGTGCTTTTTT
1|Neg_Control_Human_GA_0260|NegCtrl	GGCGCATTAAAGTCGAGAGC	0	0	0	0	0	0	0	0	0	n/a	NegCtrl	NegCtrl|26	1|Neg_Control_Human_GA_0260|NegCtrl	NegCtrl	ACCGGGCGCATTAAAGTCGAGAGCGTTTAAGAGCTATGCTGGAAACAGCATAGCAAGTTTAAATAAGGCTAGTCCGTTATCAACTTGAAAAAGTGGCACCGAGTCGGTGCTTTTTT
1|Neg_Control_Human_GA_0261|NegCtrl	GACGTAGCCTTCCGAAATAT	0	0	1026	0	0	0	0	0	1	n/a	NegCtrl	NegCtrl|27	1|Neg_Control_Human_GA_0261|NegCtrl	NegCtrl	ACCGGACGTAGCCTTCCGAAATATGTTTAAGAGCTATGCTGGAAACAGCATAGCAAGTTTAAATAAGGCTAGTCCGTTATCAACTTGAAAAAGTGGCACCGAGTCGGTGCTTTTTT
1|Neg_Control_Human_GA_0262|NegCtrl	TGAAGTGGGGCGTCGGACAC	0	0	0	0	0	0	0	0	0	n/a	NegCtrl	NegCtrl|27	1|Neg_Control_Human_GA_0262|NegCtrl	NegCtrl	ACCGTGAAGTGGGGCGTCGGACACGTTTAAGAGCTATGCTGGAAACAGCATAGCAAGTTTAAATAAGGCTAGTCCGTTATCAACTTGAAAAAGTGGCACCGAGTCGGTGCTTTTTT
1|Neg_Control_Human_GA_0263|NegCtrl	CTATATTGTCGCGCAGTGGA	0	22560	1	0	0	1	0	0	3	n/a	NegCtrl	NegCtrl|27	1|Neg_Control_Human_GA_0263|NegCtrl	NegCtrl	ACCGCTATATTGTCGCGCAGTGGAGTTTAAGAGCTATGCTGGAAACAGCATAGCAAGTTTAAATAAGGCTAGTCCGTTATCAACTTGAAAAAGTGGCACCGAGTCGGTGCTTTTTT
1|Neg_Control_Human_GA_0264|NegCtrl	CGGCTTTGTTGCCCGTAAGC	0	1	12353	0	1	0	0	0	1	n/a	NegCtrl	NegCtrl|27	1|Neg_Control_Human_GA_0264|NegCtrl	NegCtrl	ACCGCGGCTTTGTTGCCCGTAAGCGTTTAAGAGCTATGCTGGAAACAGCATAGCAAGTTTAAATAAGGCTAGTCCGTTATCAACTTGAAAAAGTGGCACCGAGTCGGTGCTTTTTT
1|Neg_Control_Human_GA_0265|NegCtrl	TCCCGGTTGGTGAACGATAC	0	0	0	0	0	0	0	0	0	n/a	NegCtrl	NegCtrl|27	1|Neg_Control_Human_GA_0265|NegCtrl	NegCtrl	ACCGTCCCGGTTGGTGAACGATACGTTTAAGAGCTATGCTGGAAACAGCATAGCAAGTTTAAATAAGGCTAGTCCGTTATCAACTTGAAAAAGTGGCACCGAGTCGGTGCTTTTTT
1|Neg_Control_Human_GA_0266|NegCtrl	TTAACTCGAACGCTCGAAAG	0	0	0	0	0	0	0	0	0	n/a	NegCtrl	NegCtrl|27	1|Neg_Control_Human_GA_0266|NegCtrl	NegCtrl	ACCGTTAACTCGAACGCTCGAAAGGTTTAAGAGCTATGCTGGAAACAGCATAGCAAGTTTAAATAAGGCTAGTCCGTTATCAACTTGAAAAAGTGGCACCGAGTCGGTGCTTTTTT
1|Neg_Control_Human_GA_0267|NegCtrl	GGACTATCCACCGTTTACTC	0	0	0	0	0	0	0	0	0	n/a	NegCtrl	NegCtrl|27	1|Neg_Control_Human_GA_0267|NegCtrl	NegCtrl	ACCGGGACTATCCACCGTTTACTCGTTTAAGAGCTATGCTGGAAACAGCATAGCAAGTTTAAATAAGGCTAGTCCGTTATCAACTTGAAAAAGTGGCACCGAGTCGGTGCTTTTTT
1|Neg_Control_Human_GA_0268|NegCtrl	CAGTAGCGATCGAATGTCAA	0	0	0	0	0	0	0	0	0	n/a	NegCtrl	NegCtrl|27	1|Neg_Control_Human_GA_0268|NegCtrl	NegCtrl	ACCGCAGTAGCGATCGAATGTCAAGTTTAAGAGCTATGCTGGAAACAGCATAGCAAGTTTAAATAAGGCTAGTCCGTTATCAACTTGAAAAAGTGGCACCGAGTCGGTGCTTTTTT
1|Neg_Control_Human_GA_0269|NegCtrl	TAGGCGCCCGTAGCATTGGA	0	0	0	0	0	0	0	0	0	n/a	NegCtrl	NegCtrl|27	1|Neg_Control_Human_GA_0269|NegCtrl	NegCtrl	ACCGTAGGCGCCCGTAGCATTGGAGTTTAAGAGCTATGCTGGAAACAGCATAGCAAGTTTAAATAAGGCTAGTCCGTTATCAACTTGAAAAAGTGGCACCGAGTCGGTGCTTTTTT
1|Neg_Control_Human_GA_0270|NegCtrl	GCGGCGTCTGGGAATCGTTC	0	0	0	0	0	0	0	0	0	n/a	NegCtrl	NegCtrl|27	1|Neg_Control_Human_GA_0270|NegCtrl	NegCtrl	ACCGGCGGCGTCTGGGAATCGTTCGTTTAAGAGCTATGCTGGAAACAGCATAGCAAGTTTAAATAAGGCTAGTCCGTTATCAACTTGAAAAAGTGGCACCGAGTCGGTGCTTTTTT
1|Neg_Control_Human_GA_0271|NegCtrl	CAGTGTCCGAGCGATATTTT	0	0	0	0	0	0	0	0	0	n/a	NegCtrl	NegCtrl|28	1|Neg_Control_Human_GA_0271|NegCtrl	NegCtrl	ACCGCAGTGTCCGAGCGATATTTTGTTTAAGAGCTATGCTGGAAACAGCATAGCAAGTTTAAATAAGGCTAGTCCGTTATCAACTTGAAAAAGTGGCACCGAGTCGGTGCTTTTTT
1|Neg_Control_Human_GA_0272|NegCtrl	TTCAATCACCTCACGGTAAG	0	0	0	21181	3	0	16	1	1	n/a	NegCtrl	NegCtrl|28	1|Neg_Control_Human_GA_0272|NegCtrl	NegCtrl	ACCGTTCAATCACCTCACGGTAAGGTTTAAGAGCTATGCTGGAAACAGCATAGCAAGTTTAAATAAGGCTAGTCCGTTATCAACTTGAAAAAGTGGCACCGAGTCGGTGCTTTTTT
1|Neg_Control_Human_GA_0273|NegCtrl	CGGTTTACATCTGCCCATCG	0	0	0	0	0	0	0	0	1	n/a	NegCtrl	NegCtrl|28	1|Neg_Control_Human_GA_0273|NegCtrl	NegCtrl	ACCGCGGTTTACATCTGCCCATCGGTTTAAGAGCTATGCTGGAAACAGCATAGCAAGTTTAAATAAGGCTAGTCCGTTATCAACTTGAAAAAGTGGCACCGAGTCGGTGCTTTTTT
1|Neg_Control_Human_GA_0274|NegCtrl	GGGCGTGTATGTTCGTATTG	0	0	0	0	0	0	0	0	0	n/a	NegCtrl	NegCtrl|28	1|Neg_Control_Human_GA_0274|NegCtrl	NegCtrl	ACCGGGGCGTGTATGTTCGTATTGGTTTAAGAGCTATGCTGGAAACAGCATAGCAAGTTTAAATAAGGCTAGTCCGTTATCAACTTGAAAAAGTGGCACCGAGTCGGTGCTTTTTT
1|Neg_Control_Human_GA_0275|NegCtrl	GCGGCGTCATCCACGCGTGC	0	0	0	0	0	0	0	0	0	n/a	NegCtrl	NegCtrl|28	1|Neg_Control_Human_GA_0275|NegCtrl	NegCtrl	ACCGGCGGCGTCATCCACGCGTGCGTTTAAGAGCTATGCTGGAAACAGCATAGCAAGTTTAAATAAGGCTAGTCCGTTATCAACTTGAAAAAGTGGCACCGAGTCGGTGCTTTTTT
1|Neg_Control_Human_GA_0276|NegCtrl	GGGTATAGACGCGATCCTCA	0	0	0	0	0	0	0	0	0	n/a	NegCtrl	NegCtrl|28	1|Neg_Control_Human_GA_0276|NegCtrl	NegCtrl	ACCGGGGTATAGACGCGATCCTCAGTTTAAGAGCTATGCTGGAAACAGCATAGCAAGTTTAAATAAGGCTAGTCCGTTATCAACTTGAAAAAGTGGCACCGAGTCGGTGCTTTTTT
1|Neg_Control_Human_GA_0277|NegCtrl	ACAGCGCTCTCGTGTACTAT	0	0	0	0	0	0	0	0	0	n/a	NegCtrl	NegCtrl|28	1|Neg_Control_Human_GA_0277|NegCtrl	NegCtrl	ACCGACAGCGCTCTCGTGTACTATGTTTAAGAGCTATGCTGGAAACAGCATAGCAAGTTTAAATAAGGCTAGTCCGTTATCAACTTGAAAAAGTGGCACCGAGTCGGTGCTTTTTT
1|Neg_Control_Human_GA_0278|NegCtrl	ACTAGCCTGTTCGCGAGTAG	0	0	0	0	0	0	0	0	0	n/a	NegCtrl	NegCtrl|28	1|Neg_Control_Human_GA_0278|NegCtrl	NegCtrl	ACCGACTAGCCTGTTCGCGAGTAGGTTTAAGAGCTATGCTGGAAACAGCATAGCAAGTTTAAATAAGGCTAGTCCGTTATCAACTTGAAAAAGTGGCACCGAGTCGGTGCTTTTTT
1|Neg_Control_Human_GA_0279|NegCtrl	GACCGCGTGAGATAACGTCA	0	0	0	0	0	0	0	0	1	n/a	NegCtrl	NegCtrl|28	1|Neg_Control_Human_GA_0279|NegCtrl	NegCtrl	ACCGGACCGCGTGAGATAACGTCAGTTTAAGAGCTATGCTGGAAACAGCATAGCAAGTTTAAATAAGGCTAGTCCGTTATCAACTTGAAAAAGTGGCACCGAGTCGGTGCTTTTTT
1|Neg_Control_Human_GA_0280|NegCtrl	CGCGTGCATCTGCCGAAGGC	0	0	0	0	0	0	0	0	0	n/a	NegCtrl	NegCtrl|28	1|Neg_Control_Human_GA_0280|NegCtrl	NegCtrl	ACCGCGCGTGCATCTGCCGAAGGCGTTTAAGAGCTATGCTGGAAACAGCATAGCAAGTTTAAATAAGGCTAGTCCGTTATCAACTTGAAAAAGTGGCACCGAGTCGGTGCTTTTTT
1|Neg_Control_Human_GA_0281|NegCtrl	AAAACATCGACCGAAAGCGT	0	2	1	0	0	37387	0	1	0	n/a	NegCtrl	NegCtrl|29	1|Neg_Control_Human_GA_0281|NegCtrl	NegCtrl	ACCGAAAACATCGACCGAAAGCGTGTTTAAGAGCTATGCTGGAAACAGCATAGCAAGTTTAAATAAGGCTAGTCCGTTATCAACTTGAAAAAGTGGCACCGAGTCGGTGCTTTTTT
1|Neg_Control_Human_GA_0282|NegCtrl	ACACCGAAGCACCTGTACGT	0	0	0	0	0	0	0	0	0	n/a	NegCtrl	NegCtrl|29	1|Neg_Control_Human_GA_0282|NegCtrl	NegCtrl	ACCGACACCGAAGCACCTGTACGTGTTTAAGAGCTATGCTGGAAACAGCATAGCAAGTTTAAATAAGGCTAGTCCGTTATCAACTTGAAAAAGTGGCACCGAGTCGGTGCTTTTTT
1|Neg_Control_Human_GA_0283|NegCtrl	GGGTCGAGGACTAATAGATT	0	0	0	0	0	0	0	0	0	n/a	NegCtrl	NegCtrl|29	1|Neg_Control_Human_GA_0283|NegCtrl	NegCtrl	ACCGGGGTCGAGGACTAATAGATTGTTTAAGAGCTATGCTGGAAACAGCATAGCAAGTTTAAATAAGGCTAGTCCGTTATCAACTTGAAAAAGTGGCACCGAGTCGGTGCTTTTTT
1|Neg_Control_Human_GA_0284|NegCtrl	ACGCCTCCTCAAATTAGCTC	0	0	0	0	0	0	0	0	0	n/a	NegCtrl	NegCtrl|29	1|Neg_Control_Human_GA_0284|NegCtrl	NegCtrl	ACCGACGCCTCCTCAAATTAGCTCGTTTAAGAGCTATGCTGGAAACAGCATAGCAAGTTTAAATAAGGCTAGTCCGTTATCAACTTGAAAAAGTGGCACCGAGTCGGTGCTTTTTT
1|Neg_Control_Human_GA_0285|NegCtrl	CCTACGCGGTAGGGAACTTT	0	0	0	0	0	0	0	0	0	n/a	NegCtrl	NegCtrl|29	1|Neg_Control_Human_GA_0285|NegCtrl	NegCtrl	ACCGCCTACGCGGTAGGGAACTTTGTTTAAGAGCTATGCTGGAAACAGCATAGCAAGTTTAAATAAGGCTAGTCCGTTATCAACTTGAAAAAGTGGCACCGAGTCGGTGCTTTTTT
1|Neg_Control_Human_GA_0286|NegCtrl	AAGCACTAGTCCGTATGATG	0	0	0	0	0	0	0	0	0	n/a	NegCtrl	NegCtrl|29	1|Neg_Control_Human_GA_0286|NegCtrl	NegCtrl	ACCGAAGCACTAGTCCGTATGATGGTTTAAGAGCTATGCTGGAAACAGCATAGCAAGTTTAAATAAGGCTAGTCCGTTATCAACTTGAAAAAGTGGCACCGAGTCGGTGCTTTTTT
1|Neg_Control_Human_GA_0287|NegCtrl	AGGCGCCAACATTGACCGTA	0	0	0	0	0	0	0	0	0	n/a	NegCtrl	NegCtrl|29	1|Neg_Control_Human_GA_0287|NegCtrl	NegCtrl	ACCGAGGCGCCAACATTGACCGTAGTTTAAGAGCTATGCTGGAAACAGCATAGCAAGTTTAAATAAGGCTAGTCCGTTATCAACTTGAAAAAGTGGCACCGAGTCGGTGCTTTTTT
1|Neg_Control_Human_GA_0288|NegCtrl	TAATCATGCACATTCGGGAC	0	0	0	0	0	0	0	0	0	n/a	NegCtrl	NegCtrl|29	1|Neg_Control_Human_GA_0288|NegCtrl	NegCtrl	ACCGTAATCATGCACATTCGGGACGTTTAAGAGCTATGCTGGAAACAGCATAGCAAGTTTAAATAAGGCTAGTCCGTTATCAACTTGAAAAAGTGGCACCGAGTCGGTGCTTTTTT
1|Neg_Control_Human_GA_0289|NegCtrl	CGTCGGGTAGCTATTTCTTT	0	0	0	1	0	0	0	0	0	n/a	NegCtrl	NegCtrl|29	1|Neg_Control_Human_GA_0289|NegCtrl	NegCtrl	ACCGCGTCGGGTAGCTATTTCTTTGTTTAAGAGCTATGCTGGAAACAGCATAGCAAGTTTAAATAAGGCTAGTCCGTTATCAACTTGAAAAAGTGGCACCGAGTCGGTGCTTTTTT
1|Neg_Control_Human_GA_0290|NegCtrl	GTGCGACGAATTGTCCTGAG	0	0	0	0	0	0	0	0	0	n/a	NegCtrl	NegCtrl|29	1|Neg_Control_Human_GA_0290|NegCtrl	NegCtrl	ACCGGTGCGACGAATTGTCCTGAGGTTTAAGAGCTATGCTGGAAACAGCATAGCAAGTTTAAATAAGGCTAGTCCGTTATCAACTTGAAAAAGTGGCACCGAGTCGGTGCTTTTTT
1|Neg_Control_Human_GA_0291|NegCtrl	CTTCCGTTATTCGGAAGTGA	0	0	0	0	0	0	0	0	0	n/a	NegCtrl	NegCtrl|30	1|Neg_Control_Human_GA_0291|NegCtrl	NegCtrl	ACCGCTTCCGTTATTCGGAAGTGAGTTTAAGAGCTATGCTGGAAACAGCATAGCAAGTTTAAATAAGGCTAGTCCGTTATCAACTTGAAAAAGTGGCACCGAGTCGGTGCTTTTTT
1|Neg_Control_Human_GA_0292|NegCtrl	TACTGGAGTTTGCGACTCGG	0	0	0	0	0	0	0	0	0	n/a	NegCtrl	NegCtrl|30	1|Neg_Control_Human_GA_0292|NegCtrl	NegCtrl	ACCGTACTGGAGTTTGCGACTCGGGTTTAAGAGCTATGCTGGAAACAGCATAGCAAGTTTAAATAAGGCTAGTCCGTTATCAACTTGAAAAAGTGGCACCGAGTCGGTGCTTTTTT
1|Neg_Control_Human_GA_0293|NegCtrl	ATCCAGATCACCACGCGTCA	0	0	0	19191	0	0	16	0	2	n/a	NegCtrl	NegCtrl|30	1|Neg_Control_Human_GA_0293|NegCtrl	NegCtrl	ACCGATCCAGATCACCACGCGTCAGTTTAAGAGCTATGCTGGAAACAGCATAGCAAGTTTAAATAAGGCTAGTCCGTTATCAACTTGAAAAAGTGGCACCGAGTCGGTGCTTTTTT
1|Neg_Control_Human_GA_0294|NegCtrl	CGTTAAGACTAGCTCGGTTT	0	0	0	0	0	0	0	0	0	n/a	NegCtrl	NegCtrl|30	1|Neg_Control_Human_GA_0294|NegCtrl	NegCtrl	ACCGCGTTAAGACTAGCTCGGTTTGTTTAAGAGCTATGCTGGAAACAGCATAGCAAGTTTAAATAAGGCTAGTCCGTTATCAACTTGAAAAAGTGGCACCGAGTCGGTGCTTTTTT
1|Neg_Control_Human_GA_0295|NegCtrl	ATACGGCCGAAGCCCCTTCA	0	0	0	0	0	0	0	0	0	n/a	NegCtrl	NegCtrl|30	1|Neg_Control_Human_GA_0295|NegCtrl	NegCtrl	ACCGATACGGCCGAAGCCCCTTCAGTTTAAGAGCTATGCTGGAAACAGCATAGCAAGTTTAAATAAGGCTAGTCCGTTATCAACTTGAAAAAGTGGCACCGAGTCGGTGCTTTTTT
1|Neg_Control_Human_GA_0296|NegCtrl	AACATCTCGTTAGGGGTATC	0	0	0	0	0	0	0	0	1	n/a	NegCtrl	NegCtrl|30	1|Neg_Control_Human_GA_0296|NegCtrl	NegCtrl	ACCGAACATCTCGTTAGGGGTATCGTTTAAGAGCTATGCTGGAAACAGCATAGCAAGTTTAAATAAGGCTAGTCCGTTATCAACTTGAAAAAGTGGCACCGAGTCGGTGCTTTTTT
1|Neg_Control_Human_GA_0297|NegCtrl	GTCAGGTAATAGTCGGACTC	0	0	0	0	0	0	0	0	0	n/a	NegCtrl	NegCtrl|30	1|Neg_Control_Human_GA_0297|NegCtrl	NegCtrl	ACCGGTCAGGTAATAGTCGGACTCGTTTAAGAGCTATGCTGGAAACAGCATAGCAAGTTTAAATAAGGCTAGTCCGTTATCAACTTGAAAAAGTGGCACCGAGTCGGTGCTTTTTT
1|Neg_Control_Human_GA_0298|NegCtrl	TTCGAGGTCCGGACAGGTCG	0	0	0	0	0	0	0	0	0	n/a	NegCtrl	NegCtrl|30	1|Neg_Control_Human_GA_0298|NegCtrl	NegCtrl	ACCGTTCGAGGTCCGGACAGGTCGGTTTAAGAGCTATGCTGGAAACAGCATAGCAAGTTTAAATAAGGCTAGTCCGTTATCAACTTGAAAAAGTGGCACCGAGTCGGTGCTTTTTT
1|Neg_Control_Human_GA_0299|NegCtrl	TGAGCATTCGTAGCCCAGCA	0	0	0	0	0	0	0	0	0	n/a	NegCtrl	NegCtrl|30	1|Neg_Control_Human_GA_0299|NegCtrl	NegCtrl	ACCGTGAGCATTCGTAGCCCAGCAGTTTAAGAGCTATGCTGGAAACAGCATAGCAAGTTTAAATAAGGCTAGTCCGTTATCAACTTGAAAAAGTGGCACCGAGTCGGTGCTTTTTT
1|Neg_Control_Human_GA_0300|NegCtrl	TAAGGCGACCTGCGCTTGTG	0	0	0	0	0	0	0	0	1	n/a	NegCtrl	NegCtrl|30	1|Neg_Control_Human_GA_0300|NegCtrl	NegCtrl	ACCGTAAGGCGACCTGCGCTTGTGGTTTAAGAGCTATGCTGGAAACAGCATAGCAAGTTTAAATAAGGCTAGTCCGTTATCAACTTGAAAAAGTGGCACCGAGTCGGTGCTTTTTT
1|Neg_Control_Human_GA_0301|NegCtrl	AGCTGCGCGCTACTGGATCA	0	0	0	0	0	0	0	0	0	n/a	NegCtrl	NegCtrl|31	1|Neg_Control_Human_GA_0301|NegCtrl	NegCtrl	ACCGAGCTGCGCGCTACTGGATCAGTTTAAGAGCTATGCTGGAAACAGCATAGCAAGTTTAAATAAGGCTAGTCCGTTATCAACTTGAAAAAGTGGCACCGAGTCGGTGCTTTTTT
1|Neg_Control_Human_GA_0302|NegCtrl	GCAAAAACCCAACGCTATTC	0	1	0	0	0	0	0	0	0	n/a	NegCtrl	NegCtrl|31	1|Neg_Control_Human_GA_0302|NegCtrl	NegCtrl	ACCGGCAAAAACCCAACGCTATTCGTTTAAGAGCTATGCTGGAAACAGCATAGCAAGTTTAAATAAGGCTAGTCCGTTATCAACTTGAAAAAGTGGCACCGAGTCGGTGCTTTTTT
1|Neg_Control_Human_GA_0303|NegCtrl	GCCGCCGATTTCATAAGTAA	0	0	0	0	0	0	0	0	0	n/a	NegCtrl	NegCtrl|31	1|Neg_Control_Human_GA_0303|NegCtrl	NegCtrl	ACCGGCCGCCGATTTCATAAGTAAGTTTAAGAGCTATGCTGGAAACAGCATAGCAAGTTTAAATAAGGCTAGTCCGTTATCAACTTGAAAAAGTGGCACCGAGTCGGTGCTTTTTT
1|Neg_Control_Human_GA_0304|NegCtrl	GTTCCGTGAGGGTTACTTCA	0	0	0	0	0	0	0	0	0	n/a	NegCtrl	NegCtrl|31	1|Neg_Control_Human_GA_0304|NegCtrl	NegCtrl	ACCGGTTCCGTGAGGGTTACTTCAGTTTAAGAGCTATGCTGGAAACAGCATAGCAAGTTTAAATAAGGCTAGTCCGTTATCAACTTGAAAAAGTGGCACCGAGTCGGTGCTTTTTT
1|Neg_Control_Human_GA_0305|NegCtrl	CGGGGAATTGCACGGCGGAA	0	0	0	0	0	0	1	0	0	n/a	NegCtrl	NegCtrl|31	1|Neg_Control_Human_GA_0305|NegCtrl	NegCtrl	ACCGCGGGGAATTGCACGGCGGAAGTTTAAGAGCTATGCTGGAAACAGCATAGCAAGTTTAAATAAGGCTAGTCCGTTATCAACTTGAAAAAGTGGCACCGAGTCGGTGCTTTTTT
1|Neg_Control_Human_GA_0306|NegCtrl	TGTCTTTAAACACGCCATCG	7	4	2	97	1	3	265128	4	4	n/a	NegCtrl	NegCtrl|31	1|Neg_Control_Human_GA_0306|NegCtrl	NegCtrl	ACCGTGTCTTTAAACACGCCATCGGTTTAAGAGCTATGCTGGAAACAGCATAGCAAGTTTAAATAAGGCTAGTCCGTTATCAACTTGAAAAAGTGGCACCGAGTCGGTGCTTTTTT
1|Neg_Control_Human_GA_0307|NegCtrl	ACAAAATGCCGTGCGTCAAT	0	0	0	0	0	0	0	0	1	n/a	NegCtrl	NegCtrl|31	1|Neg_Control_Human_GA_0307|NegCtrl	NegCtrl	ACCGACAAAATGCCGTGCGTCAATGTTTAAGAGCTATGCTGGAAACAGCATAGCAAGTTTAAATAAGGCTAGTCCGTTATCAACTTGAAAAAGTGGCACCGAGTCGGTGCTTTTTT
1|Neg_Control_Human_GA_0308|NegCtrl	ACGCTCAGCACCCGCTATGC	1	1	15048	0	0	0	0	0	0	n/a	NegCtrl	NegCtrl|31	1|Neg_Control_Human_GA_0308|NegCtrl	NegCtrl	ACCGACGCTCAGCACCCGCTATGCGTTTAAGAGCTATGCTGGAAACAGCATAGCAAGTTTAAATAAGGCTAGTCCGTTATCAACTTGAAAAAGTGGCACCGAGTCGGTGCTTTTTT
1|Neg_Control_Human_GA_0309|NegCtrl	CGAAACCCTCTTAAGTTAAC	0	0	0	0	0	0	0	0	0	n/a	NegCtrl	NegCtrl|31	1|Neg_Control_Human_GA_0309|NegCtrl	NegCtrl	ACCGCGAAACCCTCTTAAGTTAACGTTTAAGAGCTATGCTGGAAACAGCATAGCAAGTTTAAATAAGGCTAGTCCGTTATCAACTTGAAAAAGTGGCACCGAGTCGGTGCTTTTTT
1|Neg_Control_Human_GA_0310|NegCtrl	TAAACCCTTGGCGCCCTCAC	0	0	0	0	0	0	0	0	0	n/a	NegCtrl	NegCtrl|31	1|Neg_Control_Human_GA_0310|NegCtrl	NegCtrl	ACCGTAAACCCTTGGCGCCCTCACGTTTAAGAGCTATGCTGGAAACAGCATAGCAAGTTTAAATAAGGCTAGTCCGTTATCAACTTGAAAAAGTGGCACCGAGTCGGTGCTTTTTT
1|Neg_Control_Human_GA_0311|NegCtrl	CCATTCTCAACCGGTCCAAT	0	0	0	0	0	0	0	0	0	n/a	NegCtrl	NegCtrl|32	1|Neg_Control_Human_GA_0311|NegCtrl	NegCtrl	ACCGCCATTCTCAACCGGTCCAATGTTTAAGAGCTATGCTGGAAACAGCATAGCAAGTTTAAATAAGGCTAGTCCGTTATCAACTTGAAAAAGTGGCACCGAGTCGGTGCTTTTTT
1|Neg_Control_Human_GA_0312|NegCtrl	GTTATTGACCCGTCGGGAGT	1	0	6081	0	0	0	0	0	0	n/a	NegCtrl	NegCtrl|32	1|Neg_Control_Human_GA_0312|NegCtrl	NegCtrl	ACCGGTTATTGACCCGTCGGGAGTGTTTAAGAGCTATGCTGGAAACAGCATAGCAAGTTTAAATAAGGCTAGTCCGTTATCAACTTGAAAAAGTGGCACCGAGTCGGTGCTTTTTT
1|Neg_Control_Human_GA_0313|NegCtrl	CTTTGATAACGTGGGCGGTA	0	0	0	0	0	0	0	0	0	n/a	NegCtrl	NegCtrl|32	1|Neg_Control_Human_GA_0313|NegCtrl	NegCtrl	ACCGCTTTGATAACGTGGGCGGTAGTTTAAGAGCTATGCTGGAAACAGCATAGCAAGTTTAAATAAGGCTAGTCCGTTATCAACTTGAAAAAGTGGCACCGAGTCGGTGCTTTTTT
1|Neg_Control_Human_GA_0314|NegCtrl	CCCCAACTTTCGCGACTCCG	1	0	0	0	0	0	0	0	0	n/a	NegCtrl	NegCtrl|32	1|Neg_Control_Human_GA_0314|NegCtrl	NegCtrl	ACCGCCCCAACTTTCGCGACTCCGGTTTAAGAGCTATGCTGGAAACAGCATAGCAAGTTTAAATAAGGCTAGTCCGTTATCAACTTGAAAAAGTGGCACCGAGTCGGTGCTTTTTT
1|Neg_Control_Human_GA_0315|NegCtrl	CAAACAGTCTAAGGCGACGA	0	0	0	0	0	0	0	0	2	n/a	NegCtrl	NegCtrl|32	1|Neg_Control_Human_GA_0315|NegCtrl	NegCtrl	ACCGCAAACAGTCTAAGGCGACGAGTTTAAGAGCTATGCTGGAAACAGCATAGCAAGTTTAAATAAGGCTAGTCCGTTATCAACTTGAAAAAGTGGCACCGAGTCGGTGCTTTTTT
1|Neg_Control_Human_GA_0316|NegCtrl	CGGCACACCAATGCGTTCGT	0	0	0	0	0	0	0	0	0	n/a	NegCtrl	NegCtrl|32	1|Neg_Control_Human_GA_0316|NegCtrl	NegCtrl	ACCGCGGCACACCAATGCGTTCGTGTTTAAGAGCTATGCTGGAAACAGCATAGCAAGTTTAAATAAGGCTAGTCCGTTATCAACTTGAAAAAGTGGCACCGAGTCGGTGCTTTTTT
1|Neg_Control_Human_GA_0317|NegCtrl	ATCGATATACCGCCATAAAA	0	0	0	0	0	0	0	0	0	n/a	NegCtrl	NegCtrl|32	1|Neg_Control_Human_GA_0317|NegCtrl	NegCtrl	ACCGATCGATATACCGCCATAAAAGTTTAAGAGCTATGCTGGAAACAGCATAGCAAGTTTAAATAAGGCTAGTCCGTTATCAACTTGAAAAAGTGGCACCGAGTCGGTGCTTTTTT
1|Neg_Control_Human_GA_0318|NegCtrl	GGGACGCGAAAGAAACCAGT	0	0	0	0	0	0	0	0	0	n/a	NegCtrl	NegCtrl|32	1|Neg_Control_Human_GA_0318|NegCtrl	NegCtrl	ACCGGGGACGCGAAAGAAACCAGTGTTTAAGAGCTATGCTGGAAACAGCATAGCAAGTTTAAATAAGGCTAGTCCGTTATCAACTTGAAAAAGTGGCACCGAGTCGGTGCTTTTTT
1|Neg_Control_Human_GA_0319|NegCtrl	AACGCGAGTCCGGTGGCTAG	0	0	0	0	0	0	0	0	0	n/a	NegCtrl	NegCtrl|32	1|Neg_Control_Human_GA_0319|NegCtrl	NegCtrl	ACCGAACGCGAGTCCGGTGGCTAGGTTTAAGAGCTATGCTGGAAACAGCATAGCAAGTTTAAATAAGGCTAGTCCGTTATCAACTTGAAAAAGTGGCACCGAGTCGGTGCTTTTTT
1|Neg_Control_Human_GA_0320|NegCtrl	TGTCATTAGCGTAACGATAT	0	53466	0	0	0	1	0	0	8	n/a	NegCtrl	NegCtrl|32	1|Neg_Control_Human_GA_0320|NegCtrl	NegCtrl	ACCGTGTCATTAGCGTAACGATATGTTTAAGAGCTATGCTGGAAACAGCATAGCAAGTTTAAATAAGGCTAGTCCGTTATCAACTTGAAAAAGTGGCACCGAGTCGGTGCTTTTTT
1|Neg_Control_Human_GA_0321|NegCtrl	AGGGCGAGCAGCAGAGTACG	0	0	0	0	0	0	0	0	0	n/a	NegCtrl	NegCtrl|33	1|Neg_Control_Human_GA_0321|NegCtrl	NegCtrl	ACCGAGGGCGAGCAGCAGAGTACGGTTTAAGAGCTATGCTGGAAACAGCATAGCAAGTTTAAATAAGGCTAGTCCGTTATCAACTTGAAAAAGTGGCACCGAGTCGGTGCTTTTTT
1|Neg_Control_Human_GA_0322|NegCtrl	CCGTCTCCGCATCGTCTTTT	0	0	1	0	0	0	0	0	1	n/a	NegCtrl	NegCtrl|33	1|Neg_Control_Human_GA_0322|NegCtrl	NegCtrl	ACCGCCGTCTCCGCATCGTCTTTTGTTTAAGAGCTATGCTGGAAACAGCATAGCAAGTTTAAATAAGGCTAGTCCGTTATCAACTTGAAAAAGTGGCACCGAGTCGGTGCTTTTTT
1|Neg_Control_Human_GA_0323|NegCtrl	CGTGCGTGAAATCGCTAGCT	0	0	0	0	0	0	0	0	2	n/a	NegCtrl	NegCtrl|33	1|Neg_Control_Human_GA_0323|NegCtrl	NegCtrl	ACCGCGTGCGTGAAATCGCTAGCTGTTTAAGAGCTATGCTGGAAACAGCATAGCAAGTTTAAATAAGGCTAGTCCGTTATCAACTTGAAAAAGTGGCACCGAGTCGGTGCTTTTTT
1|Neg_Control_Human_GA_0324|NegCtrl	ATCAGGCCTTGTCCGTGATT	1	1	16023	3	2	83024	1	6	1	n/a	NegCtrl	NegCtrl|33	1|Neg_Control_Human_GA_0324|NegCtrl	NegCtrl	ACCGATCAGGCCTTGTCCGTGATTGTTTAAGAGCTATGCTGGAAACAGCATAGCAAGTTTAAATAAGGCTAGTCCGTTATCAACTTGAAAAAGTGGCACCGAGTCGGTGCTTTTTT
1|Neg_Control_Human_GA_0325|NegCtrl	CGTCCAGAAGAACGGCCCCT	0	0	0	0	0	0	0	0	0	n/a	NegCtrl	NegCtrl|33	1|Neg_Control_Human_GA_0325|NegCtrl	NegCtrl	ACCGCGTCCAGAAGAACGGCCCCTGTTTAAGAGCTATGCTGGAAACAGCATAGCAAGTTTAAATAAGGCTAGTCCGTTATCAACTTGAAAAAGTGGCACCGAGTCGGTGCTTTTTT
1|Neg_Control_Human_GA_0326|NegCtrl	GATGGCGCGCAGTTGAGTCA	0	0	0	0	0	0	0	0	0	n/a	NegCtrl	NegCtrl|33	1|Neg_Control_Human_GA_0326|NegCtrl	NegCtrl	ACCGGATGGCGCGCAGTTGAGTCAGTTTAAGAGCTATGCTGGAAACAGCATAGCAAGTTTAAATAAGGCTAGTCCGTTATCAACTTGAAAAAGTGGCACCGAGTCGGTGCTTTTTT
1|Neg_Control_Human_GA_0327|NegCtrl	ACGCTGACGAGTAAAAGCGG	0	0	0	0	0	0	0	0	0	n/a	NegCtrl	NegCtrl|33	1|Neg_Control_Human_GA_0327|NegCtrl	NegCtrl	ACCGACGCTGACGAGTAAAAGCGGGTTTAAGAGCTATGCTGGAAACAGCATAGCAAGTTTAAATAAGGCTAGTCCGTTATCAACTTGAAAAAGTGGCACCGAGTCGGTGCTTTTTT
1|Neg_Control_Human_GA_0328|NegCtrl	TATCAATCGTCCGGGTCACT	0	0	0	0	0	0	0	0	0	n/a	NegCtrl	NegCtrl|33	1|Neg_Control_Human_GA_0328|NegCtrl	NegCtrl	ACCGTATCAATCGTCCGGGTCACTGTTTAAGAGCTATGCTGGAAACAGCATAGCAAGTTTAAATAAGGCTAGTCCGTTATCAACTTGAAAAAGTGGCACCGAGTCGGTGCTTTTTT
1|Neg_Control_Human_GA_0329|NegCtrl	TCAGATTCCGCAAGGGTCCA	0	0	0	0	0	0	0	0	0	n/a	NegCtrl	NegCtrl|33	1|Neg_Control_Human_GA_0329|NegCtrl	NegCtrl	ACCGTCAGATTCCGCAAGGGTCCAGTTTAAGAGCTATGCTGGAAACAGCATAGCAAGTTTAAATAAGGCTAGTCCGTTATCAACTTGAAAAAGTGGCACCGAGTCGGTGCTTTTTT
1|Neg_Control_Human_GA_0330|NegCtrl	GCGATCGGAGTGCCACGATA	0	0	0	0	0	0	0	0	0	n/a	NegCtrl	NegCtrl|33	1|Neg_Control_Human_GA_0330|NegCtrl	NegCtrl	ACCGGCGATCGGAGTGCCACGATAGTTTAAGAGCTATGCTGGAAACAGCATAGCAAGTTTAAATAAGGCTAGTCCGTTATCAACTTGAAAAAGTGGCACCGAGTCGGTGCTTTTTT
1|Neg_Control_Human_GA_0331|NegCtrl	ATATAAACTGTCGCGGTAAA	0	0	0	0	0	0	0	0	0	n/a	NegCtrl	NegCtrl|34	1|Neg_Control_Human_GA_0331|NegCtrl	NegCtrl	ACCGATATAAACTGTCGCGGTAAAGTTTAAGAGCTATGCTGGAAACAGCATAGCAAGTTTAAATAAGGCTAGTCCGTTATCAACTTGAAAAAGTGGCACCGAGTCGGTGCTTTTTT
1|Neg_Control_Human_GA_0332|NegCtrl	GTTACCTGCTACGAAAACGA	0	0	0	0	0	0	0	0	0	n/a	NegCtrl	NegCtrl|34	1|Neg_Control_Human_GA_0332|NegCtrl	NegCtrl	ACCGGTTACCTGCTACGAAAACGAGTTTAAGAGCTATGCTGGAAACAGCATAGCAAGTTTAAATAAGGCTAGTCCGTTATCAACTTGAAAAAGTGGCACCGAGTCGGTGCTTTTTT
1|Neg_Control_Human_GA_0333|NegCtrl	GAAGCGATCCGAGAGTGTAT	0	0	0	0	0	0	0	0	0	n/a	NegCtrl	NegCtrl|34	1|Neg_Control_Human_GA_0333|NegCtrl	NegCtrl	ACCGGAAGCGATCCGAGAGTGTATGTTTAAGAGCTATGCTGGAAACAGCATAGCAAGTTTAAATAAGGCTAGTCCGTTATCAACTTGAAAAAGTGGCACCGAGTCGGTGCTTTTTT
1|Neg_Control_Human_GA_0334|NegCtrl	ATGACATTGCGCGTCTACGG	0	0	1	0	0	0	0	0	0	n/a	NegCtrl	NegCtrl|34	1|Neg_Control_Human_GA_0334|NegCtrl	NegCtrl	ACCGATGACATTGCGCGTCTACGGGTTTAAGAGCTATGCTGGAAACAGCATAGCAAGTTTAAATAAGGCTAGTCCGTTATCAACTTGAAAAAGTGGCACCGAGTCGGTGCTTTTTT
1|Neg_Control_Human_GA_0335|NegCtrl	ATACCAGATGCGTCCGCTTG	0	0	15449	0	0	0	0	0	0	n/a	NegCtrl	NegCtrl|34	1|Neg_Control_Human_GA_0335|NegCtrl	NegCtrl	ACCGATACCAGATGCGTCCGCTTGGTTTAAGAGCTATGCTGGAAACAGCATAGCAAGTTTAAATAAGGCTAGTCCGTTATCAACTTGAAAAAGTGGCACCGAGTCGGTGCTTTTTT
1|Neg_Control_Human_GA_0336|NegCtrl	AACGTGCTGACGATGCGGGC	0	0	0	0	0	0	0	0	0	n/a	NegCtrl	NegCtrl|34	1|Neg_Control_Human_GA_0336|NegCtrl	NegCtrl	ACCGAACGTGCTGACGATGCGGGCGTTTAAGAGCTATGCTGGAAACAGCATAGCAAGTTTAAATAAGGCTAGTCCGTTATCAACTTGAAAAAGTGGCACCGAGTCGGTGCTTTTTT
1|Neg_Control_Human_GA_0337|NegCtrl	CGGCACCTGTTAGGCTATTC	0	0	0	0	0	0	0	0	0	n/a	NegCtrl	NegCtrl|34	1|Neg_Control_Human_GA_0337|NegCtrl	NegCtrl	ACCGCGGCACCTGTTAGGCTATTCGTTTAAGAGCTATGCTGGAAACAGCATAGCAAGTTTAAATAAGGCTAGTCCGTTATCAACTTGAAAAAGTGGCACCGAGTCGGTGCTTTTTT
1|Neg_Control_Human_GA_0338|NegCtrl	AGGATCGTGTACCGGGGACG	0	0	0	0	0	0	0	0	0	n/a	NegCtrl	NegCtrl|34	1|Neg_Control_Human_GA_0338|NegCtrl	NegCtrl	ACCGAGGATCGTGTACCGGGGACGGTTTAAGAGCTATGCTGGAAACAGCATAGCAAGTTTAAATAAGGCTAGTCCGTTATCAACTTGAAAAAGTGGCACCGAGTCGGTGCTTTTTT
1|Neg_Control_Human_GA_0339|NegCtrl	CGACAACGTGCAGGTGTATC	0	0	0	0	0	0	0	0	0	n/a	NegCtrl	NegCtrl|34	1|Neg_Control_Human_GA_0339|NegCtrl	NegCtrl	ACCGCGACAACGTGCAGGTGTATCGTTTAAGAGCTATGCTGGAAACAGCATAGCAAGTTTAAATAAGGCTAGTCCGTTATCAACTTGAAAAAGTGGCACCGAGTCGGTGCTTTTTT
1|Neg_Control_Human_GA_0340|NegCtrl	ACTCGAAATCACCTATGGTA	0	0	0	0	0	0	0	0	0	n/a	NegCtrl	NegCtrl|34	1|Neg_Control_Human_GA_0340|NegCtrl	NegCtrl	ACCGACTCGAAATCACCTATGGTAGTTTAAGAGCTATGCTGGAAACAGCATAGCAAGTTTAAATAAGGCTAGTCCGTTATCAACTTGAAAAAGTGGCACCGAGTCGGTGCTTTTTT
1|Neg_Control_Human_GA_0341|NegCtrl	TCTCGTAGCCTAATGCGCCA	0	0	0	0	0	0	0	0	0	n/a	NegCtrl	NegCtrl|35	1|Neg_Control_Human_GA_0341|NegCtrl	NegCtrl	ACCGTCTCGTAGCCTAATGCGCCAGTTTAAGAGCTATGCTGGAAACAGCATAGCAAGTTTAAATAAGGCTAGTCCGTTATCAACTTGAAAAAGTGGCACCGAGTCGGTGCTTTTTT
1|Neg_Control_Human_GA_0342|NegCtrl	TTATGTGAGCACGCCATTAC	0	0	0	0	0	0	0	0	0	n/a	NegCtrl	NegCtrl|35	1|Neg_Control_Human_GA_0342|NegCtrl	NegCtrl	ACCGTTATGTGAGCACGCCATTACGTTTAAGAGCTATGCTGGAAACAGCATAGCAAGTTTAAATAAGGCTAGTCCGTTATCAACTTGAAAAAGTGGCACCGAGTCGGTGCTTTTTT
1|Neg_Control_Human_GA_0343|NegCtrl	CGACGGTAATGCACCTACTA	0	0	0	0	0	0	0	0	0	n/a	NegCtrl	NegCtrl|35	1|Neg_Control_Human_GA_0343|NegCtrl	NegCtrl	ACCGCGACGGTAATGCACCTACTAGTTTAAGAGCTATGCTGGAAACAGCATAGCAAGTTTAAATAAGGCTAGTCCGTTATCAACTTGAAAAAGTGGCACCGAGTCGGTGCTTTTTT
1|Neg_Control_Human_GA_0344|NegCtrl	ATCTGTGTGACTGCGGTCGG	0	0	0	0	0	0	0	0	2	n/a	NegCtrl	NegCtrl|35	1|Neg_Control_Human_GA_0344|NegCtrl	NegCtrl	ACCGATCTGTGTGACTGCGGTCGGGTTTAAGAGCTATGCTGGAAACAGCATAGCAAGTTTAAATAAGGCTAGTCCGTTATCAACTTGAAAAAGTGGCACCGAGTCGGTGCTTTTTT
1|Neg_Control_Human_GA_0345|NegCtrl	TGGAAAGCGAGCACACCGTC	0	0	0	0	0	0	0	0	0	n/a	NegCtrl	NegCtrl|35	1|Neg_Control_Human_GA_0345|NegCtrl	NegCtrl	ACCGTGGAAAGCGAGCACACCGTCGTTTAAGAGCTATGCTGGAAACAGCATAGCAAGTTTAAATAAGGCTAGTCCGTTATCAACTTGAAAAAGTGGCACCGAGTCGGTGCTTTTTT
1|Neg_Control_Human_GA_0346|NegCtrl	CAGCGCCGAAACTCTTTCCG	1	0	72306	0	1	0	0	2	4	n/a	NegCtrl	NegCtrl|35	1|Neg_Control_Human_GA_0346|NegCtrl	NegCtrl	ACCGCAGCGCCGAAACTCTTTCCGGTTTAAGAGCTATGCTGGAAACAGCATAGCAAGTTTAAATAAGGCTAGTCCGTTATCAACTTGAAAAAGTGGCACCGAGTCGGTGCTTTTTT
1|Neg_Control_Human_GA_0347|NegCtrl	TGCCGTTAGCATGCGATCCC	0	0	0	0	0	0	0	0	0	n/a	NegCtrl	NegCtrl|35	1|Neg_Control_Human_GA_0347|NegCtrl	NegCtrl	ACCGTGCCGTTAGCATGCGATCCCGTTTAAGAGCTATGCTGGAAACAGCATAGCAAGTTTAAATAAGGCTAGTCCGTTATCAACTTGAAAAAGTGGCACCGAGTCGGTGCTTTTTT
1|Neg_Control_Human_GA_0348|NegCtrl	TCGTAAACACACGACCAAGT	0	0	0	0	0	0	0	0	0	n/a	NegCtrl	NegCtrl|35	1|Neg_Control_Human_GA_0348|NegCtrl	NegCtrl	ACCGTCGTAAACACACGACCAAGTGTTTAAGAGCTATGCTGGAAACAGCATAGCAAGTTTAAATAAGGCTAGTCCGTTATCAACTTGAAAAAGTGGCACCGAGTCGGTGCTTTTTT
1|Neg_Control_Human_GA_0349|NegCtrl	ACTACTCCGGCAAATACTCG	0	0	0	0	0	0	0	0	0	n/a	NegCtrl	NegCtrl|35	1|Neg_Control_Human_GA_0349|NegCtrl	NegCtrl	ACCGACTACTCCGGCAAATACTCGGTTTAAGAGCTATGCTGGAAACAGCATAGCAAGTTTAAATAAGGCTAGTCCGTTATCAACTTGAAAAAGTGGCACCGAGTCGGTGCTTTTTT
1|Neg_Control_Human_GA_0350|NegCtrl	GCCCTTCAATGCGTTCCGTA	0	0	0	0	0	0	0	0	0	n/a	NegCtrl	NegCtrl|35	1|Neg_Control_Human_GA_0350|NegCtrl	NegCtrl	ACCGGCCCTTCAATGCGTTCCGTAGTTTAAGAGCTATGCTGGAAACAGCATAGCAAGTTTAAATAAGGCTAGTCCGTTATCAACTTGAAAAAGTGGCACCGAGTCGGTGCTTTTTT
1|Neg_Control_Human_GA_0351|NegCtrl	CAACACCCCGCGTTATGCTA	0	0	10896	0	0	0	0	0	0	n/a	NegCtrl	NegCtrl|36	1|Neg_Control_Human_GA_0351|NegCtrl	NegCtrl	ACCGCAACACCCCGCGTTATGCTAGTTTAAGAGCTATGCTGGAAACAGCATAGCAAGTTTAAATAAGGCTAGTCCGTTATCAACTTGAAAAAGTGGCACCGAGTCGGTGCTTTTTT
1|Neg_Control_Human_GA_0352|NegCtrl	GCTGATATATACGACAAGCC	0	0	0	0	0	0	0	0	0	n/a	NegCtrl	NegCtrl|36	1|Neg_Control_Human_GA_0352|NegCtrl	NegCtrl	ACCGGCTGATATATACGACAAGCCGTTTAAGAGCTATGCTGGAAACAGCATAGCAAGTTTAAATAAGGCTAGTCCGTTATCAACTTGAAAAAGTGGCACCGAGTCGGTGCTTTTTT
1|Neg_Control_Human_GA_0353|NegCtrl	GGTATTCCGAAGTCCTCCGC	0	0	0	0	0	0	0	0	0	n/a	NegCtrl	NegCtrl|36	1|Neg_Control_Human_GA_0353|NegCtrl	NegCtrl	ACCGGGTATTCCGAAGTCCTCCGCGTTTAAGAGCTATGCTGGAAACAGCATAGCAAGTTTAAATAAGGCTAGTCCGTTATCAACTTGAAAAAGTGGCACCGAGTCGGTGCTTTTTT
1|Neg_Control_Human_GA_0354|NegCtrl	GGTCGCCTGTGCGACATGCT	0	0	0	0	0	16958	0	1	0	n/a	NegCtrl	NegCtrl|36	1|Neg_Control_Human_GA_0354|NegCtrl	NegCtrl	ACCGGGTCGCCTGTGCGACATGCTGTTTAAGAGCTATGCTGGAAACAGCATAGCAAGTTTAAATAAGGCTAGTCCGTTATCAACTTGAAAAAGTGGCACCGAGTCGGTGCTTTTTT
1|Neg_Control_Human_GA_0355|NegCtrl	CTAATCACGACCTCACCCTA	0	0	0	0	0	0	0	0	0	n/a	NegCtrl	NegCtrl|36	1|Neg_Control_Human_GA_0355|NegCtrl	NegCtrl	ACCGCTAATCACGACCTCACCCTAGTTTAAGAGCTATGCTGGAAACAGCATAGCAAGTTTAAATAAGGCTAGTCCGTTATCAACTTGAAAAAGTGGCACCGAGTCGGTGCTTTTTT
1|Neg_Control_Human_GA_0356|NegCtrl	ATCGGTACCTCTTCACATAT	0	0	0	0	0	0	0	0	0	n/a	NegCtrl	NegCtrl|36	1|Neg_Control_Human_GA_0356|NegCtrl	NegCtrl	ACCGATCGGTACCTCTTCACATATGTTTAAGAGCTATGCTGGAAACAGCATAGCAAGTTTAAATAAGGCTAGTCCGTTATCAACTTGAAAAAGTGGCACCGAGTCGGTGCTTTTTT
1|Neg_Control_Human_GA_0357|NegCtrl	TTGCGTCAGCGCTGCACATC	0	0	0	0	0	0	0	0	0	n/a	NegCtrl	NegCtrl|36	1|Neg_Control_Human_GA_0357|NegCtrl	NegCtrl	ACCGTTGCGTCAGCGCTGCACATCGTTTAAGAGCTATGCTGGAAACAGCATAGCAAGTTTAAATAAGGCTAGTCCGTTATCAACTTGAAAAAGTGGCACCGAGTCGGTGCTTTTTT
1|Neg_Control_Human_GA_0358|NegCtrl	CGGTGTGCCCCCAAATATTG	0	0	0	0	23099	0	1	0	0	n/a	NegCtrl	NegCtrl|36	1|Neg_Control_Human_GA_0358|NegCtrl	NegCtrl	ACCGCGGTGTGCCCCCAAATATTGGTTTAAGAGCTATGCTGGAAACAGCATAGCAAGTTTAAATAAGGCTAGTCCGTTATCAACTTGAAAAAGTGGCACCGAGTCGGTGCTTTTTT
1|Neg_Control_Human_GA_0359|NegCtrl	CGTGCGGTAAATACGAAATA	0	0	0	0	0	0	0	0	0	n/a	NegCtrl	NegCtrl|36	1|Neg_Control_Human_GA_0359|NegCtrl	NegCtrl	ACCGCGTGCGGTAAATACGAAATAGTTTAAGAGCTATGCTGGAAACAGCATAGCAAGTTTAAATAAGGCTAGTCCGTTATCAACTTGAAAAAGTGGCACCGAGTCGGTGCTTTTTT
1|Neg_Control_Human_GA_0360|NegCtrl	ATACGAGGCGCTTTTCTTTG	0	0	0	0	0	0	0	0	0	n/a	NegCtrl	NegCtrl|36	1|Neg_Control_Human_GA_0360|NegCtrl	NegCtrl	ACCGATACGAGGCGCTTTTCTTTGGTTTAAGAGCTATGCTGGAAACAGCATAGCAAGTTTAAATAAGGCTAGTCCGTTATCAACTTGAAAAAGTGGCACCGAGTCGGTGCTTTTTT
1|Neg_Control_Human_GA_0361|NegCtrl	TGTGCACAAGTCGCAACGAA	0	0	0	0	0	0	0	0	0	n/a	NegCtrl	NegCtrl|37	1|Neg_Control_Human_GA_0361|NegCtrl	NegCtrl	ACCGTGTGCACAAGTCGCAACGAAGTTTAAGAGCTATGCTGGAAACAGCATAGCAAGTTTAAATAAGGCTAGTCCGTTATCAACTTGAAAAAGTGGCACCGAGTCGGTGCTTTTTT
1|Neg_Control_Human_GA_0362|NegCtrl	CTCGGCCCACTTGCGTTATA	0	0	0	0	0	0	0	0	0	n/a	NegCtrl	NegCtrl|37	1|Neg_Control_Human_GA_0362|NegCtrl	NegCtrl	ACCGCTCGGCCCACTTGCGTTATAGTTTAAGAGCTATGCTGGAAACAGCATAGCAAGTTTAAATAAGGCTAGTCCGTTATCAACTTGAAAAAGTGGCACCGAGTCGGTGCTTTTTT
1|Neg_Control_Human_GA_0363|NegCtrl	TATACTGCGGATCAATCTGA	0	0	0	0	0	0	0	0	0	n/a	NegCtrl	NegCtrl|37	1|Neg_Control_Human_GA_0363|NegCtrl	NegCtrl	ACCGTATACTGCGGATCAATCTGAGTTTAAGAGCTATGCTGGAAACAGCATAGCAAGTTTAAATAAGGCTAGTCCGTTATCAACTTGAAAAAGTGGCACCGAGTCGGTGCTTTTTT
1|Neg_Control_Human_GA_0364|NegCtrl	AAAGCGACGTAGGCATACTT	0	0	0	0	0	0	0	0	0	n/a	NegCtrl	NegCtrl|37	1|Neg_Control_Human_GA_0364|NegCtrl	NegCtrl	ACCGAAAGCGACGTAGGCATACTTGTTTAAGAGCTATGCTGGAAACAGCATAGCAAGTTTAAATAAGGCTAGTCCGTTATCAACTTGAAAAAGTGGCACCGAGTCGGTGCTTTTTT
1|Neg_Control_Human_GA_0365|NegCtrl	ACGATCGGTAATGGTCTGTT	0	0	0	0	0	0	0	0	0	n/a	NegCtrl	NegCtrl|37	1|Neg_Control_Human_GA_0365|NegCtrl	NegCtrl	ACCGACGATCGGTAATGGTCTGTTGTTTAAGAGCTATGCTGGAAACAGCATAGCAAGTTTAAATAAGGCTAGTCCGTTATCAACTTGAAAAAGTGGCACCGAGTCGGTGCTTTTTT
1|Neg_Control_Human_GA_0366|NegCtrl	GGGCCTACGATCAGAGGTGT	0	0	0	0	0	0	0	0	0	n/a	NegCtrl	NegCtrl|37	1|Neg_Control_Human_GA_0366|NegCtrl	NegCtrl	ACCGGGGCCTACGATCAGAGGTGTGTTTAAGAGCTATGCTGGAAACAGCATAGCAAGTTTAAATAAGGCTAGTCCGTTATCAACTTGAAAAAGTGGCACCGAGTCGGTGCTTTTTT
1|Neg_Control_Human_GA_0367|NegCtrl	CGCAGTCATTCGATAGGAAT	0	0	0	0	0	0	0	0	0	n/a	NegCtrl	NegCtrl|37	1|Neg_Control_Human_GA_0367|NegCtrl	NegCtrl	ACCGCGCAGTCATTCGATAGGAATGTTTAAGAGCTATGCTGGAAACAGCATAGCAAGTTTAAATAAGGCTAGTCCGTTATCAACTTGAAAAAGTGGCACCGAGTCGGTGCTTTTTT
1|Neg_Control_Human_GA_0368|NegCtrl	GGCGATTCGGGTGGAGGTCG	0	0	0	0	0	0	0	0	0	n/a	NegCtrl	NegCtrl|37	1|Neg_Control_Human_GA_0368|NegCtrl	NegCtrl	ACCGGGCGATTCGGGTGGAGGTCGGTTTAAGAGCTATGCTGGAAACAGCATAGCAAGTTTAAATAAGGCTAGTCCGTTATCAACTTGAAAAAGTGGCACCGAGTCGGTGCTTTTTT
1|Neg_Control_Human_GA_0369|NegCtrl	AGTTGAATGGACCTCGACTA	1	0	1	0	25640	1	0	0	0	n/a	NegCtrl	NegCtrl|37	1|Neg_Control_Human_GA_0369|NegCtrl	NegCtrl	ACCGAGTTGAATGGACCTCGACTAGTTTAAGAGCTATGCTGGAAACAGCATAGCAAGTTTAAATAAGGCTAGTCCGTTATCAACTTGAAAAAGTGGCACCGAGTCGGTGCTTTTTT
1|Neg_Control_Human_GA_0370|NegCtrl	GAGTAATTTCGAACGTATTG	0	0	0	0	0	0	0	0	0	n/a	NegCtrl	NegCtrl|37	1|Neg_Control_Human_GA_0370|NegCtrl	NegCtrl	ACCGGAGTAATTTCGAACGTATTGGTTTAAGAGCTATGCTGGAAACAGCATAGCAAGTTTAAATAAGGCTAGTCCGTTATCAACTTGAAAAAGTGGCACCGAGTCGGTGCTTTTTT
1|Neg_Control_Human_GA_0371|NegCtrl	TTCCACGGTAAAATCGGTCA	0	0	0	0	0	0	0	0	0	n/a	NegCtrl	NegCtrl|38	1|Neg_Control_Human_GA_0371|NegCtrl	NegCtrl	ACCGTTCCACGGTAAAATCGGTCAGTTTAAGAGCTATGCTGGAAACAGCATAGCAAGTTTAAATAAGGCTAGTCCGTTATCAACTTGAAAAAGTGGCACCGAGTCGGTGCTTTTTT
1|Neg_Control_Human_GA_0372|NegCtrl	ACTGTTGCCGCGCCAACTGC	1	0	0	0	0	0	0	11201	1	n/a	NegCtrl	NegCtrl|38	1|Neg_Control_Human_GA_0372|NegCtrl	NegCtrl	ACCGACTGTTGCCGCGCCAACTGCGTTTAAGAGCTATGCTGGAAACAGCATAGCAAGTTTAAATAAGGCTAGTCCGTTATCAACTTGAAAAAGTGGCACCGAGTCGGTGCTTTTTT
1|Neg_Control_Human_GA_0373|NegCtrl	CCGGCAAGAAACTATACTTG	0	0	0	0	0	0	0	0	0	n/a	NegCtrl	NegCtrl|38	1|Neg_Control_Human_GA_0373|NegCtrl	NegCtrl	ACCGCCGGCAAGAAACTATACTTGGTTTAAGAGCTATGCTGGAAACAGCATAGCAAGTTTAAATAAGGCTAGTCCGTTATCAACTTGAAAAAGTGGCACCGAGTCGGTGCTTTTTT
1|Neg_Control_Human_GA_0374|NegCtrl	TAGTGGGAATGGTCGCGTAG	0	0	0	0	0	0	0	0	0	n/a	NegCtrl	NegCtrl|38	1|Neg_Control_Human_GA_0374|NegCtrl	NegCtrl	ACCGTAGTGGGAATGGTCGCGTAGGTTTAAGAGCTATGCTGGAAACAGCATAGCAAGTTTAAATAAGGCTAGTCCGTTATCAACTTGAAAAAGTGGCACCGAGTCGGTGCTTTTTT
1|Neg_Control_Human_GA_0375|NegCtrl	CCGCTGTCTCACTAATCTCA	0	0	0	0	0	0	0	0	0	n/a	NegCtrl	NegCtrl|38	1|Neg_Control_Human_GA_0375|NegCtrl	NegCtrl	ACCGCCGCTGTCTCACTAATCTCAGTTTAAGAGCTATGCTGGAAACAGCATAGCAAGTTTAAATAAGGCTAGTCCGTTATCAACTTGAAAAAGTGGCACCGAGTCGGTGCTTTTTT
1|Neg_Control_Human_GA_0376|NegCtrl	TGCTACCTTCGGGACCACCA	0	0	0	0	0	0	0	0	0	n/a	NegCtrl	NegCtrl|38	1|Neg_Control_Human_GA_0376|NegCtrl	NegCtrl	ACCGTGCTACCTTCGGGACCACCAGTTTAAGAGCTATGCTGGAAACAGCATAGCAAGTTTAAATAAGGCTAGTCCGTTATCAACTTGAAAAAGTGGCACCGAGTCGGTGCTTTTTT
1|Neg_Control_Human_GA_0377|NegCtrl	CTTAGCTGACCGACAAGGTG	0	0	0	0	0	0	0	0	0	n/a	NegCtrl	NegCtrl|38	1|Neg_Control_Human_GA_0377|NegCtrl	NegCtrl	ACCGCTTAGCTGACCGACAAGGTGGTTTAAGAGCTATGCTGGAAACAGCATAGCAAGTTTAAATAAGGCTAGTCCGTTATCAACTTGAAAAAGTGGCACCGAGTCGGTGCTTTTTT
1|Neg_Control_Human_GA_0378|NegCtrl	CTTAAGCTTATCAACATCCG	0	0	0	0	0	0	0	0	0	n/a	NegCtrl	NegCtrl|38	1|Neg_Control_Human_GA_0378|NegCtrl	NegCtrl	ACCGCTTAAGCTTATCAACATCCGGTTTAAGAGCTATGCTGGAAACAGCATAGCAAGTTTAAATAAGGCTAGTCCGTTATCAACTTGAAAAAGTGGCACCGAGTCGGTGCTTTTTT
1|Neg_Control_Human_GA_0379|NegCtrl	ACGGAAAGACCTCGCTATTC	0	0	0	0	0	0	0	0	0	n/a	NegCtrl	NegCtrl|38	1|Neg_Control_Human_GA_0379|NegCtrl	NegCtrl	ACCGACGGAAAGACCTCGCTATTCGTTTAAGAGCTATGCTGGAAACAGCATAGCAAGTTTAAATAAGGCTAGTCCGTTATCAACTTGAAAAAGTGGCACCGAGTCGGTGCTTTTTT
1|Neg_Control_Human_GA_0380|NegCtrl	CCCTTCTGGCGGGCCAAACA	0	0	0	0	0	0	0	0	0	n/a	NegCtrl	NegCtrl|38	1|Neg_Control_Human_GA_0380|NegCtrl	NegCtrl	ACCGCCCTTCTGGCGGGCCAAACAGTTTAAGAGCTATGCTGGAAACAGCATAGCAAGTTTAAATAAGGCTAGTCCGTTATCAACTTGAAAAAGTGGCACCGAGTCGGTGCTTTTTT
1|Neg_Control_Human_GA_0381|NegCtrl	TCTGACGATTAATGCTTCTA	1	0	34515	0	0	0	1	0	0	n/a	NegCtrl	NegCtrl|39	1|Neg_Control_Human_GA_0381|NegCtrl	NegCtrl	ACCGTCTGACGATTAATGCTTCTAGTTTAAGAGCTATGCTGGAAACAGCATAGCAAGTTTAAATAAGGCTAGTCCGTTATCAACTTGAAAAAGTGGCACCGAGTCGGTGCTTTTTT
1|Neg_Control_Human_GA_0382|NegCtrl	GCGGAATGAACACGAGGTAG	0	0	0	0	0	0	0	0	2	n/a	NegCtrl	NegCtrl|39	1|Neg_Control_Human_GA_0382|NegCtrl	NegCtrl	ACCGGCGGAATGAACACGAGGTAGGTTTAAGAGCTATGCTGGAAACAGCATAGCAAGTTTAAATAAGGCTAGTCCGTTATCAACTTGAAAAAGTGGCACCGAGTCGGTGCTTTTTT
1|Neg_Control_Human_GA_0383|NegCtrl	CAGACGGTTGGTAAGGACGC	0	0	0	0	0	0	0	0	0	n/a	NegCtrl	NegCtrl|39	1|Neg_Control_Human_GA_0383|NegCtrl	NegCtrl	ACCGCAGACGGTTGGTAAGGACGCGTTTAAGAGCTATGCTGGAAACAGCATAGCAAGTTTAAATAAGGCTAGTCCGTTATCAACTTGAAAAAGTGGCACCGAGTCGGTGCTTTTTT
1|Neg_Control_Human_GA_0384|NegCtrl	GGGACTGATATATGGCGAAC	0	0	0	0	0	0	0	0	0	n/a	NegCtrl	NegCtrl|39	1|Neg_Control_Human_GA_0384|NegCtrl	NegCtrl	ACCGGGGACTGATATATGGCGAACGTTTAAGAGCTATGCTGGAAACAGCATAGCAAGTTTAAATAAGGCTAGTCCGTTATCAACTTGAAAAAGTGGCACCGAGTCGGTGCTTTTTT
1|Neg_Control_Human_GA_0385|NegCtrl	CAGGTTTGCACGCATAGCTA	1	1	1	0	0	2	0	16225	1	n/a	NegCtrl	NegCtrl|39	1|Neg_Control_Human_GA_0385|NegCtrl	NegCtrl	ACCGCAGGTTTGCACGCATAGCTAGTTTAAGAGCTATGCTGGAAACAGCATAGCAAGTTTAAATAAGGCTAGTCCGTTATCAACTTGAAAAAGTGGCACCGAGTCGGTGCTTTTTT
1|Neg_Control_Human_GA_0386|NegCtrl	GGCCGTCGTATTCCCCCAAG	0	0	0	1	0	0	0	0	0	n/a	NegCtrl	NegCtrl|39	1|Neg_Control_Human_GA_0386|NegCtrl	NegCtrl	ACCGGGCCGTCGTATTCCCCCAAGGTTTAAGAGCTATGCTGGAAACAGCATAGCAAGTTTAAATAAGGCTAGTCCGTTATCAACTTGAAAAAGTGGCACCGAGTCGGTGCTTTTTT
1|Neg_Control_Human_GA_0387|NegCtrl	CTCCCATTGATCTACGATGG	0	0	0	0	0	0	0	0	0	n/a	NegCtrl	NegCtrl|39	1|Neg_Control_Human_GA_0387|NegCtrl	NegCtrl	ACCGCTCCCATTGATCTACGATGGGTTTAAGAGCTATGCTGGAAACAGCATAGCAAGTTTAAATAAGGCTAGTCCGTTATCAACTTGAAAAAGTGGCACCGAGTCGGTGCTTTTTT
1|Neg_Control_Human_GA_0388|NegCtrl	TTTCGTGCCGATGTAACACA	0	0	0	0	0	0	0	0	0	n/a	NegCtrl	NegCtrl|39	1|Neg_Control_Human_GA_0388|NegCtrl	NegCtrl	ACCGTTTCGTGCCGATGTAACACAGTTTAAGAGCTATGCTGGAAACAGCATAGCAAGTTTAAATAAGGCTAGTCCGTTATCAACTTGAAAAAGTGGCACCGAGTCGGTGCTTTTTT
1|Neg_Control_Human_GA_0389|NegCtrl	ATCACGTGATCGGATGGTTC	0	0	0	0	0	0	0	0	0	n/a	NegCtrl	NegCtrl|39	1|Neg_Control_Human_GA_0389|NegCtrl	NegCtrl	ACCGATCACGTGATCGGATGGTTCGTTTAAGAGCTATGCTGGAAACAGCATAGCAAGTTTAAATAAGGCTAGTCCGTTATCAACTTGAAAAAGTGGCACCGAGTCGGTGCTTTTTT
1|Neg_Control_Human_GA_0390|NegCtrl	GCCTATCGGCATTCCCACTG	0	0	0	0	0	0	0	0	0	n/a	NegCtrl	NegCtrl|39	1|Neg_Control_Human_GA_0390|NegCtrl	NegCtrl	ACCGGCCTATCGGCATTCCCACTGGTTTAAGAGCTATGCTGGAAACAGCATAGCAAGTTTAAATAAGGCTAGTCCGTTATCAACTTGAAAAAGTGGCACCGAGTCGGTGCTTTTTT
1|Neg_Control_Human_GA_0391|NegCtrl	CAACGACGGGCCTAGTCTCA	0	0	0	0	0	0	0	0	0	n/a	NegCtrl	NegCtrl|40	1|Neg_Control_Human_GA_0391|NegCtrl	NegCtrl	ACCGCAACGACGGGCCTAGTCTCAGTTTAAGAGCTATGCTGGAAACAGCATAGCAAGTTTAAATAAGGCTAGTCCGTTATCAACTTGAAAAAGTGGCACCGAGTCGGTGCTTTTTT
1|Neg_Control_Human_GA_0392|NegCtrl	ATATTTCGGCAGTTGCAGCA	0	0	0	0	0	0	0	0	0	n/a	NegCtrl	NegCtrl|40	1|Neg_Control_Human_GA_0392|NegCtrl	NegCtrl	ACCGATATTTCGGCAGTTGCAGCAGTTTAAGAGCTATGCTGGAAACAGCATAGCAAGTTTAAATAAGGCTAGTCCGTTATCAACTTGAAAAAGTGGCACCGAGTCGGTGCTTTTTT
1|Neg_Control_Human_GA_0393|NegCtrl	GATATCCCGCGAAAAAATCT	17693	0	0	0	0	0	0	4	0	n/a	NegCtrl	NegCtrl|40	1|Neg_Control_Human_GA_0393|NegCtrl	NegCtrl	ACCGGATATCCCGCGAAAAAATCTGTTTAAGAGCTATGCTGGAAACAGCATAGCAAGTTTAAATAAGGCTAGTCCGTTATCAACTTGAAAAAGTGGCACCGAGTCGGTGCTTTTTT
1|Neg_Control_Human_GA_0394|NegCtrl	TCACTTGTCTATACGGGGTA	0	0	0	0	0	0	0	0	0	n/a	NegCtrl	NegCtrl|40	1|Neg_Control_Human_GA_0394|NegCtrl	NegCtrl	ACCGTCACTTGTCTATACGGGGTAGTTTAAGAGCTATGCTGGAAACAGCATAGCAAGTTTAAATAAGGCTAGTCCGTTATCAACTTGAAAAAGTGGCACCGAGTCGGTGCTTTTTT
1|Neg_Control_Human_GA_0395|NegCtrl	ATGTTATTACAGACGCGTGT	0	0	0	0	0	0	0	0	0	n/a	NegCtrl	NegCtrl|40	1|Neg_Control_Human_GA_0395|NegCtrl	NegCtrl	ACCGATGTTATTACAGACGCGTGTGTTTAAGAGCTATGCTGGAAACAGCATAGCAAGTTTAAATAAGGCTAGTCCGTTATCAACTTGAAAAAGTGGCACCGAGTCGGTGCTTTTTT
1|Neg_Control_Human_GA_0396|NegCtrl	TGGGAATTCCTCGGCCGATT	0	0	0	0	0	0	0	0	0	n/a	NegCtrl	NegCtrl|40	1|Neg_Control_Human_GA_0396|NegCtrl	NegCtrl	ACCGTGGGAATTCCTCGGCCGATTGTTTAAGAGCTATGCTGGAAACAGCATAGCAAGTTTAAATAAGGCTAGTCCGTTATCAACTTGAAAAAGTGGCACCGAGTCGGTGCTTTTTT
1|Neg_Control_Human_GA_0397|NegCtrl	CGCCTCTCACGTGTAGGCTT	0	0	0	0	0	0	0	0	0	n/a	NegCtrl	NegCtrl|40	1|Neg_Control_Human_GA_0397|NegCtrl	NegCtrl	ACCGCGCCTCTCACGTGTAGGCTTGTTTAAGAGCTATGCTGGAAACAGCATAGCAAGTTTAAATAAGGCTAGTCCGTTATCAACTTGAAAAAGTGGCACCGAGTCGGTGCTTTTTT
1|Neg_Control_Human_GA_0398|NegCtrl	GGGCGCTAAGATATATGCCC	0	0	0	0	0	0	0	0	0	n/a	NegCtrl	NegCtrl|40	1|Neg_Control_Human_GA_0398|NegCtrl	NegCtrl	ACCGGGGCGCTAAGATATATGCCCGTTTAAGAGCTATGCTGGAAACAGCATAGCAAGTTTAAATAAGGCTAGTCCGTTATCAACTTGAAAAAGTGGCACCGAGTCGGTGCTTTTTT
1|Neg_Control_Human_GA_0399|NegCtrl	CGTCATATACACAAACGCCC	0	24700	0	0	0	0	0	1	3	n/a	NegCtrl	NegCtrl|40	1|Neg_Control_Human_GA_0399|NegCtrl	NegCtrl	ACCGCGTCATATACACAAACGCCCGTTTAAGAGCTATGCTGGAAACAGCATAGCAAGTTTAAATAAGGCTAGTCCGTTATCAACTTGAAAAAGTGGCACCGAGTCGGTGCTTTTTT
1|Neg_Control_Human_GA_0400|NegCtrl	CGTTGGGCATAGCGAACACT	1	1	1	1	0	4	0	26200	0	n/a	NegCtrl	NegCtrl|40	1|Neg_Control_Human_GA_0400|NegCtrl	NegCtrl	ACCGCGTTGGGCATAGCGAACACTGTTTAAGAGCTATGCTGGAAACAGCATAGCAAGTTTAAATAAGGCTAGTCCGTTATCAACTTGAAAAAGTGGCACCGAGTCGGTGCTTTTTT
1|Neg_Control_Human_GA_0401|NegCtrl	GCGGGGCGGTGACTTTCAAG	0	0	0	0	0	0	0	0	0	n/a	NegCtrl	NegCtrl|41	1|Neg_Control_Human_GA_0401|NegCtrl	NegCtrl	ACCGGCGGGGCGGTGACTTTCAAGGTTTAAGAGCTATGCTGGAAACAGCATAGCAAGTTTAAATAAGGCTAGTCCGTTATCAACTTGAAAAAGTGGCACCGAGTCGGTGCTTTTTT
1|Neg_Control_Human_GA_0402|NegCtrl	AAGGGCGTGCCCTGCGTTGT	0	0	0	0	0	0	0	0	0	n/a	NegCtrl	NegCtrl|41	1|Neg_Control_Human_GA_0402|NegCtrl	NegCtrl	ACCGAAGGGCGTGCCCTGCGTTGTGTTTAAGAGCTATGCTGGAAACAGCATAGCAAGTTTAAATAAGGCTAGTCCGTTATCAACTTGAAAAAGTGGCACCGAGTCGGTGCTTTTTT
1|Neg_Control_Human_GA_0403|NegCtrl	GCGTTCCCCCACTGACGGGG	0	0	0	0	0	0	0	0	0	n/a	NegCtrl	NegCtrl|41	1|Neg_Control_Human_GA_0403|NegCtrl	NegCtrl	ACCGGCGTTCCCCCACTGACGGGGGTTTAAGAGCTATGCTGGAAACAGCATAGCAAGTTTAAATAAGGCTAGTCCGTTATCAACTTGAAAAAGTGGCACCGAGTCGGTGCTTTTTT
1|Neg_Control_Human_GA_0404|NegCtrl	GATCCAGGAGTGATCGAGTA	1	0	35364	0	2	0	1	0	2	n/a	NegCtrl	NegCtrl|41	1|Neg_Control_Human_GA_0404|NegCtrl	NegCtrl	ACCGGATCCAGGAGTGATCGAGTAGTTTAAGAGCTATGCTGGAAACAGCATAGCAAGTTTAAATAAGGCTAGTCCGTTATCAACTTGAAAAAGTGGCACCGAGTCGGTGCTTTTTT
1|Neg_Control_Human_GA_0405|NegCtrl	AGCATTTGCGCGGCAACTGT	0	0	0	0	0	0	0	0	1	n/a	NegCtrl	NegCtrl|41	1|Neg_Control_Human_GA_0405|NegCtrl	NegCtrl	ACCGAGCATTTGCGCGGCAACTGTGTTTAAGAGCTATGCTGGAAACAGCATAGCAAGTTTAAATAAGGCTAGTCCGTTATCAACTTGAAAAAGTGGCACCGAGTCGGTGCTTTTTT
1|Neg_Control_Human_GA_0406|NegCtrl	TTGTCCCTGAGAAAACGCGG	0	0	0	0	0	0	0	0	0	n/a	NegCtrl	NegCtrl|41	1|Neg_Control_Human_GA_0406|NegCtrl	NegCtrl	ACCGTTGTCCCTGAGAAAACGCGGGTTTAAGAGCTATGCTGGAAACAGCATAGCAAGTTTAAATAAGGCTAGTCCGTTATCAACTTGAAAAAGTGGCACCGAGTCGGTGCTTTTTT
1|Neg_Control_Human_GA_0407|NegCtrl	GTCCTCATCCGGTCAGGCTG	0	0	0	0	0	0	0	0	0	n/a	NegCtrl	NegCtrl|41	1|Neg_Control_Human_GA_0407|NegCtrl	NegCtrl	ACCGGTCCTCATCCGGTCAGGCTGGTTTAAGAGCTATGCTGGAAACAGCATAGCAAGTTTAAATAAGGCTAGTCCGTTATCAACTTGAAAAAGTGGCACCGAGTCGGTGCTTTTTT
1|Neg_Control_Human_GA_0408|NegCtrl	TATAGCTGTTTCGAAGGCGC	0	0	0	0	0	0	0	0	0	n/a	NegCtrl	NegCtrl|41	1|Neg_Control_Human_GA_0408|NegCtrl	NegCtrl	ACCGTATAGCTGTTTCGAAGGCGCGTTTAAGAGCTATGCTGGAAACAGCATAGCAAGTTTAAATAAGGCTAGTCCGTTATCAACTTGAAAAAGTGGCACCGAGTCGGTGCTTTTTT
1|Neg_Control_Human_GA_0409|NegCtrl	CGTGGTAGGGGTTTCCTCAA	2	4	2	58	1	3	197989	3	3	n/a	NegCtrl	NegCtrl|41	1|Neg_Control_Human_GA_0409|NegCtrl	NegCtrl	ACCGCGTGGTAGGGGTTTCCTCAAGTTTAAGAGCTATGCTGGAAACAGCATAGCAAGTTTAAATAAGGCTAGTCCGTTATCAACTTGAAAAAGTGGCACCGAGTCGGTGCTTTTTT
1|Neg_Control_Human_GA_0410|NegCtrl	CCATCACCGATCGTGAGCCT	0	0	0	0	0	0	0	0	0	n/a	NegCtrl	NegCtrl|41	1|Neg_Control_Human_GA_0410|NegCtrl	NegCtrl	ACCGCCATCACCGATCGTGAGCCTGTTTAAGAGCTATGCTGGAAACAGCATAGCAAGTTTAAATAAGGCTAGTCCGTTATCAACTTGAAAAAGTGGCACCGAGTCGGTGCTTTTTT
1|Neg_Control_Human_GA_0411|NegCtrl	TGAATCGTAACCTCGCCATT	0	0	0	0	0	0	0	0	0	n/a	NegCtrl	NegCtrl|42	1|Neg_Control_Human_GA_0411|NegCtrl	NegCtrl	ACCGTGAATCGTAACCTCGCCATTGTTTAAGAGCTATGCTGGAAACAGCATAGCAAGTTTAAATAAGGCTAGTCCGTTATCAACTTGAAAAAGTGGCACCGAGTCGGTGCTTTTTT
1|Neg_Control_Human_GA_0412|NegCtrl	AAGAAGGGCCGTACCCGAAA	0	1	22423	1	2	1	0	0	2	n/a	NegCtrl	NegCtrl|42	1|Neg_Control_Human_GA_0412|NegCtrl	NegCtrl	ACCGAAGAAGGGCCGTACCCGAAAGTTTAAGAGCTATGCTGGAAACAGCATAGCAAGTTTAAATAAGGCTAGTCCGTTATCAACTTGAAAAAGTGGCACCGAGTCGGTGCTTTTTT
1|Neg_Control_Human_GA_0413|NegCtrl	CGTGTTTGGAATTTGCCGCG	0	0	0	0	0	0	0	0	0	n/a	NegCtrl	NegCtrl|42	1|Neg_Control_Human_GA_0413|NegCtrl	NegCtrl	ACCGCGTGTTTGGAATTTGCCGCGGTTTAAGAGCTATGCTGGAAACAGCATAGCAAGTTTAAATAAGGCTAGTCCGTTATCAACTTGAAAAAGTGGCACCGAGTCGGTGCTTTTTT
1|Neg_Control_Human_GA_0414|NegCtrl	CAAGTGAGCATAAGCGATGT	0	0	0	0	0	0	0	0	0	n/a	NegCtrl	NegCtrl|42	1|Neg_Control_Human_GA_0414|NegCtrl	NegCtrl	ACCGCAAGTGAGCATAAGCGATGTGTTTAAGAGCTATGCTGGAAACAGCATAGCAAGTTTAAATAAGGCTAGTCCGTTATCAACTTGAAAAAGTGGCACCGAGTCGGTGCTTTTTT
1|Neg_Control_Human_GA_0415|NegCtrl	AGGACTAGTGTCGCACTCAG	0	0	0	0	0	0	0	0	0	n/a	NegCtrl	NegCtrl|42	1|Neg_Control_Human_GA_0415|NegCtrl	NegCtrl	ACCGAGGACTAGTGTCGCACTCAGGTTTAAGAGCTATGCTGGAAACAGCATAGCAAGTTTAAATAAGGCTAGTCCGTTATCAACTTGAAAAAGTGGCACCGAGTCGGTGCTTTTTT
1|Neg_Control_Human_GA_0416|NegCtrl	GGCACTCCGAAAGACCTTAT	0	0	0	0	0	0	0	0	0	n/a	NegCtrl	NegCtrl|42	1|Neg_Control_Human_GA_0416|NegCtrl	NegCtrl	ACCGGGCACTCCGAAAGACCTTATGTTTAAGAGCTATGCTGGAAACAGCATAGCAAGTTTAAATAAGGCTAGTCCGTTATCAACTTGAAAAAGTGGCACCGAGTCGGTGCTTTTTT
1|Neg_Control_Human_GA_0417|NegCtrl	CCCAGGTGTATAATGAAACG	0	0	0	0	0	0	0	0	0	n/a	NegCtrl	NegCtrl|42	1|Neg_Control_Human_GA_0417|NegCtrl	NegCtrl	ACCGCCCAGGTGTATAATGAAACGGTTTAAGAGCTATGCTGGAAACAGCATAGCAAGTTTAAATAAGGCTAGTCCGTTATCAACTTGAAAAAGTGGCACCGAGTCGGTGCTTTTTT
1|Neg_Control_Human_GA_0418|NegCtrl	GACCGCAAAGTGGTCCGAAG	0	0	0	0	0	0	0	0	0	n/a	NegCtrl	NegCtrl|42	1|Neg_Control_Human_GA_0418|NegCtrl	NegCtrl	ACCGGACCGCAAAGTGGTCCGAAGGTTTAAGAGCTATGCTGGAAACAGCATAGCAAGTTTAAATAAGGCTAGTCCGTTATCAACTTGAAAAAGTGGCACCGAGTCGGTGCTTTTTT
1|Neg_Control_Human_GA_0419|NegCtrl	GTTGCGAGTTACTATTGGTT	0	0	0	0	0	0	0	0	0	n/a	NegCtrl	NegCtrl|42	1|Neg_Control_Human_GA_0419|NegCtrl	NegCtrl	ACCGGTTGCGAGTTACTATTGGTTGTTTAAGAGCTATGCTGGAAACAGCATAGCAAGTTTAAATAAGGCTAGTCCGTTATCAACTTGAAAAAGTGGCACCGAGTCGGTGCTTTTTT
1|Neg_Control_Human_GA_0420|NegCtrl	TCTAAAGCCGTCCTGATGTT	0	0	0	0	0	0	0	0	0	n/a	NegCtrl	NegCtrl|42	1|Neg_Control_Human_GA_0420|NegCtrl	NegCtrl	ACCGTCTAAAGCCGTCCTGATGTTGTTTAAGAGCTATGCTGGAAACAGCATAGCAAGTTTAAATAAGGCTAGTCCGTTATCAACTTGAAAAAGTGGCACCGAGTCGGTGCTTTTTT
1|Neg_Control_Human_GA_0421|NegCtrl	GCCGTGGTATCAAGTCGGTA	1	43019	1	0	0	2	0	0	4	n/a	NegCtrl	NegCtrl|43	1|Neg_Control_Human_GA_0421|NegCtrl	NegCtrl	ACCGGCCGTGGTATCAAGTCGGTAGTTTAAGAGCTATGCTGGAAACAGCATAGCAAGTTTAAATAAGGCTAGTCCGTTATCAACTTGAAAAAGTGGCACCGAGTCGGTGCTTTTTT
1|Neg_Control_Human_GA_0422|NegCtrl	CGCAATCCCTTAGGATAGCC	0	0	0	0	0	0	0	0	1	n/a	NegCtrl	NegCtrl|43	1|Neg_Control_Human_GA_0422|NegCtrl	NegCtrl	ACCGCGCAATCCCTTAGGATAGCCGTTTAAGAGCTATGCTGGAAACAGCATAGCAAGTTTAAATAAGGCTAGTCCGTTATCAACTTGAAAAAGTGGCACCGAGTCGGTGCTTTTTT
1|Neg_Control_Human_GA_0423|NegCtrl	TTTGGGTTTATCCGCCCCCA	3	1	1	4	109382	4	3	1	1	n/a	NegCtrl	NegCtrl|43	1|Neg_Control_Human_GA_0423|NegCtrl	NegCtrl	ACCGTTTGGGTTTATCCGCCCCCAGTTTAAGAGCTATGCTGGAAACAGCATAGCAAGTTTAAATAAGGCTAGTCCGTTATCAACTTGAAAAAGTGGCACCGAGTCGGTGCTTTTTT
1|Neg_Control_Human_GA_0424|NegCtrl	CTAGAGGGGTATAGCAACAA	0	0	0	0	0	0	0	0	0	n/a	NegCtrl	NegCtrl|43	1|Neg_Control_Human_GA_0424|NegCtrl	NegCtrl	ACCGCTAGAGGGGTATAGCAACAAGTTTAAGAGCTATGCTGGAAACAGCATAGCAAGTTTAAATAAGGCTAGTCCGTTATCAACTTGAAAAAGTGGCACCGAGTCGGTGCTTTTTT
1|Neg_Control_Human_GA_0425|NegCtrl	CTCGGGACTAACGTGAGAGC	0	0	0	0	0	0	0	0	0	n/a	NegCtrl	NegCtrl|43	1|Neg_Control_Human_GA_0425|NegCtrl	NegCtrl	ACCGCTCGGGACTAACGTGAGAGCGTTTAAGAGCTATGCTGGAAACAGCATAGCAAGTTTAAATAAGGCTAGTCCGTTATCAACTTGAAAAAGTGGCACCGAGTCGGTGCTTTTTT
1|Neg_Control_Human_GA_0426|NegCtrl	CCCCGTAGCTCATTAGTCTG	0	0	0	0	0	0	0	0	0	n/a	NegCtrl	NegCtrl|43	1|Neg_Control_Human_GA_0426|NegCtrl	NegCtrl	ACCGCCCCGTAGCTCATTAGTCTGGTTTAAGAGCTATGCTGGAAACAGCATAGCAAGTTTAAATAAGGCTAGTCCGTTATCAACTTGAAAAAGTGGCACCGAGTCGGTGCTTTTTT
1|Neg_Control_Human_GA_0427|NegCtrl	GAAAACACGATGACGTCTCT	0	0	0	0	0	0	0	0	0	n/a	NegCtrl	NegCtrl|43	1|Neg_Control_Human_GA_0427|NegCtrl	NegCtrl	ACCGGAAAACACGATGACGTCTCTGTTTAAGAGCTATGCTGGAAACAGCATAGCAAGTTTAAATAAGGCTAGTCCGTTATCAACTTGAAAAAGTGGCACCGAGTCGGTGCTTTTTT
1|Neg_Control_Human_GA_0428|NegCtrl	GACGCCCTAATGCCCATCGT	0	0	0	0	0	0	0	0	0	n/a	NegCtrl	NegCtrl|43	1|Neg_Control_Human_GA_0428|NegCtrl	NegCtrl	ACCGGACGCCCTAATGCCCATCGTGTTTAAGAGCTATGCTGGAAACAGCATAGCAAGTTTAAATAAGGCTAGTCCGTTATCAACTTGAAAAAGTGGCACCGAGTCGGTGCTTTTTT
1|Neg_Control_Human_GA_0429|NegCtrl	GGATATTGAGTAAACCCGAT	0	0	0	0	0	0	0	0	0	n/a	NegCtrl	NegCtrl|43	1|Neg_Control_Human_GA_0429|NegCtrl	NegCtrl	ACCGGGATATTGAGTAAACCCGATGTTTAAGAGCTATGCTGGAAACAGCATAGCAAGTTTAAATAAGGCTAGTCCGTTATCAACTTGAAAAAGTGGCACCGAGTCGGTGCTTTTTT
1|Neg_Control_Human_GA_0430|NegCtrl	TGACTCGGGCAATATCGGTT	0	0	0	0	0	0	0	0	0	n/a	NegCtrl	NegCtrl|43	1|Neg_Control_Human_GA_0430|NegCtrl	NegCtrl	ACCGTGACTCGGGCAATATCGGTTGTTTAAGAGCTATGCTGGAAACAGCATAGCAAGTTTAAATAAGGCTAGTCCGTTATCAACTTGAAAAAGTGGCACCGAGTCGGTGCTTTTTT
1|Neg_Control_Human_GA_0431|NegCtrl	GATCTAGTCCTCTAATCGAT	0	0	0	0	0	0	0	0	0	n/a	NegCtrl	NegCtrl|44	1|Neg_Control_Human_GA_0431|NegCtrl	NegCtrl	ACCGGATCTAGTCCTCTAATCGATGTTTAAGAGCTATGCTGGAAACAGCATAGCAAGTTTAAATAAGGCTAGTCCGTTATCAACTTGAAAAAGTGGCACCGAGTCGGTGCTTTTTT
1|Neg_Control_Human_GA_0432|NegCtrl	CATAAGGTTAACTGCGTGGA	0	0	0	0	0	0	0	0	0	n/a	NegCtrl	NegCtrl|44	1|Neg_Control_Human_GA_0432|NegCtrl	NegCtrl	ACCGCATAAGGTTAACTGCGTGGAGTTTAAGAGCTATGCTGGAAACAGCATAGCAAGTTTAAATAAGGCTAGTCCGTTATCAACTTGAAAAAGTGGCACCGAGTCGGTGCTTTTTT
1|Neg_Control_Human_GA_0433|NegCtrl	GGTACCTGAACAACGGCACC	0	0	0	0	0	0	0	0	0	n/a	NegCtrl	NegCtrl|44	1|Neg_Control_Human_GA_0433|NegCtrl	NegCtrl	ACCGGGTACCTGAACAACGGCACCGTTTAAGAGCTATGCTGGAAACAGCATAGCAAGTTTAAATAAGGCTAGTCCGTTATCAACTTGAAAAAGTGGCACCGAGTCGGTGCTTTTTT
1|Neg_Control_Human_GA_0434|NegCtrl	TGGCGGCCCAAACTTAACAC	0	0	0	0	0	0	0	0	0	n/a	NegCtrl	NegCtrl|44	1|Neg_Control_Human_GA_0434|NegCtrl	NegCtrl	ACCGTGGCGGCCCAAACTTAACACGTTTAAGAGCTATGCTGGAAACAGCATAGCAAGTTTAAATAAGGCTAGTCCGTTATCAACTTGAAAAAGTGGCACCGAGTCGGTGCTTTTTT
1|Neg_Control_Human_GA_0435|NegCtrl	GGGCGGTCAGGTCGCTCCGA	0	0	0	0	0	0	0	0	0	n/a	NegCtrl	NegCtrl|44	1|Neg_Control_Human_GA_0435|NegCtrl	NegCtrl	ACCGGGGCGGTCAGGTCGCTCCGAGTTTAAGAGCTATGCTGGAAACAGCATAGCAAGTTTAAATAAGGCTAGTCCGTTATCAACTTGAAAAAGTGGCACCGAGTCGGTGCTTTTTT
1|Neg_Control_Human_GA_0436|NegCtrl	TCCGGAGGCTCAAACCAAGT	0	0	0	0	0	0	0	0	0	n/a	NegCtrl	NegCtrl|44	1|Neg_Control_Human_GA_0436|NegCtrl	NegCtrl	ACCGTCCGGAGGCTCAAACCAAGTGTTTAAGAGCTATGCTGGAAACAGCATAGCAAGTTTAAATAAGGCTAGTCCGTTATCAACTTGAAAAAGTGGCACCGAGTCGGTGCTTTTTT
1|Neg_Control_Human_GA_0437|NegCtrl	GCTTGCTATATGGGTGCGAG	0	0	0	0	0	0	0	0	0	n/a	NegCtrl	NegCtrl|44	1|Neg_Control_Human_GA_0437|NegCtrl	NegCtrl	ACCGGCTTGCTATATGGGTGCGAGGTTTAAGAGCTATGCTGGAAACAGCATAGCAAGTTTAAATAAGGCTAGTCCGTTATCAACTTGAAAAAGTGGCACCGAGTCGGTGCTTTTTT
1|Neg_Control_Human_GA_0438|NegCtrl	TCGGCTACGGCGTGGAGAAG	0	0	0	0	0	0	0	0	0	n/a	NegCtrl	NegCtrl|44	1|Neg_Control_Human_GA_0438|NegCtrl	NegCtrl	ACCGTCGGCTACGGCGTGGAGAAGGTTTAAGAGCTATGCTGGAAACAGCATAGCAAGTTTAAATAAGGCTAGTCCGTTATCAACTTGAAAAAGTGGCACCGAGTCGGTGCTTTTTT
1|Neg_Control_Human_GA_0439|NegCtrl	CCCGTGGCGTGCGCACCTGT	0	0	0	0	0	0	0	0	0	n/a	NegCtrl	NegCtrl|44	1|Neg_Control_Human_GA_0439|NegCtrl	NegCtrl	ACCGCCCGTGGCGTGCGCACCTGTGTTTAAGAGCTATGCTGGAAACAGCATAGCAAGTTTAAATAAGGCTAGTCCGTTATCAACTTGAAAAAGTGGCACCGAGTCGGTGCTTTTTT
1|Neg_Control_Human_GA_0440|NegCtrl	GGCTGGTTGACGACTCCTGA	0	0	0	0	0	0	0	0	1	n/a	NegCtrl	NegCtrl|44	1|Neg_Control_Human_GA_0440|NegCtrl	NegCtrl	ACCGGGCTGGTTGACGACTCCTGAGTTTAAGAGCTATGCTGGAAACAGCATAGCAAGTTTAAATAAGGCTAGTCCGTTATCAACTTGAAAAAGTGGCACCGAGTCGGTGCTTTTTT
1|Neg_Control_Human_GA_0441|NegCtrl	GGTGCGGTCTGCTTGTAGAT	0	0	0	0	0	0	0	0	0	n/a	NegCtrl	NegCtrl|45	1|Neg_Control_Human_GA_0441|NegCtrl	NegCtrl	ACCGGGTGCGGTCTGCTTGTAGATGTTTAAGAGCTATGCTGGAAACAGCATAGCAAGTTTAAATAAGGCTAGTCCGTTATCAACTTGAAAAAGTGGCACCGAGTCGGTGCTTTTTT
1|Neg_Control_Human_GA_0442|NegCtrl	TGCCTATGACCTAGGTACCA	0	0	0	0	0	0	0	0	0	n/a	NegCtrl	NegCtrl|45	1|Neg_Control_Human_GA_0442|NegCtrl	NegCtrl	ACCGTGCCTATGACCTAGGTACCAGTTTAAGAGCTATGCTGGAAACAGCATAGCAAGTTTAAATAAGGCTAGTCCGTTATCAACTTGAAAAAGTGGCACCGAGTCGGTGCTTTTTT
1|Neg_Control_Human_GA_0443|NegCtrl	GACAGATCACGTATCAGGGC	0	0	0	0	0	0	0	0	0	n/a	NegCtrl	NegCtrl|45	1|Neg_Control_Human_GA_0443|NegCtrl	NegCtrl	ACCGGACAGATCACGTATCAGGGCGTTTAAGAGCTATGCTGGAAACAGCATAGCAAGTTTAAATAAGGCTAGTCCGTTATCAACTTGAAAAAGTGGCACCGAGTCGGTGCTTTTTT
1|Neg_Control_Human_GA_0444|NegCtrl	GAGGTATGTCATCGCCATGA	0	0	0	0	0	0	0	0	1	n/a	NegCtrl	NegCtrl|45	1|Neg_Control_Human_GA_0444|NegCtrl	NegCtrl	ACCGGAGGTATGTCATCGCCATGAGTTTAAGAGCTATGCTGGAAACAGCATAGCAAGTTTAAATAAGGCTAGTCCGTTATCAACTTGAAAAAGTGGCACCGAGTCGGTGCTTTTTT
1|Neg_Control_Human_GA_0445|NegCtrl	GCCATTCTAGTCCCGGCATA	0	0	0	0	0	0	0	0	0	n/a	NegCtrl	NegCtrl|45	1|Neg_Control_Human_GA_0445|NegCtrl	NegCtrl	ACCGGCCATTCTAGTCCCGGCATAGTTTAAGAGCTATGCTGGAAACAGCATAGCAAGTTTAAATAAGGCTAGTCCGTTATCAACTTGAAAAAGTGGCACCGAGTCGGTGCTTTTTT
1|Neg_Control_Human_GA_0446|NegCtrl	TGAATCGAATACAAACGATG	0	0	0	0	0	0	0	0	0	n/a	NegCtrl	NegCtrl|45	1|Neg_Control_Human_GA_0446|NegCtrl	NegCtrl	ACCGTGAATCGAATACAAACGATGGTTTAAGAGCTATGCTGGAAACAGCATAGCAAGTTTAAATAAGGCTAGTCCGTTATCAACTTGAAAAAGTGGCACCGAGTCGGTGCTTTTTT
1|Neg_Control_Human_GA_0447|NegCtrl	GTTACGTACCCTCCAACTTC	0	0	0	0	0	0	0	0	0	n/a	NegCtrl	NegCtrl|45	1|Neg_Control_Human_GA_0447|NegCtrl	NegCtrl	ACCGGTTACGTACCCTCCAACTTCGTTTAAGAGCTATGCTGGAAACAGCATAGCAAGTTTAAATAAGGCTAGTCCGTTATCAACTTGAAAAAGTGGCACCGAGTCGGTGCTTTTTT
1|Neg_Control_Human_GA_0448|NegCtrl	CCAATGATAAGCCCGAACGG	0	0	0	0	0	0	0	0	0	n/a	NegCtrl	NegCtrl|45	1|Neg_Control_Human_GA_0448|NegCtrl	NegCtrl	ACCGCCAATGATAAGCCCGAACGGGTTTAAGAGCTATGCTGGAAACAGCATAGCAAGTTTAAATAAGGCTAGTCCGTTATCAACTTGAAAAAGTGGCACCGAGTCGGTGCTTTTTT
1|Neg_Control_Human_GA_0449|NegCtrl	AGCGATTCACGTATTAGATG	0	0	0	0	0	0	0	0	0	n/a	NegCtrl	NegCtrl|45	1|Neg_Control_Human_GA_0449|NegCtrl	NegCtrl	ACCGAGCGATTCACGTATTAGATGGTTTAAGAGCTATGCTGGAAACAGCATAGCAAGTTTAAATAAGGCTAGTCCGTTATCAACTTGAAAAAGTGGCACCGAGTCGGTGCTTTTTT
1|Neg_Control_Human_GA_0450|NegCtrl	GCCAACAAGAATCGGATCCC	0	1	0	29074	3	0	22	1	0	n/a	NegCtrl	NegCtrl|45	1|Neg_Control_Human_GA_0450|NegCtrl	NegCtrl	ACCGGCCAACAAGAATCGGATCCCGTTTAAGAGCTATGCTGGAAACAGCATAGCAAGTTTAAATAAGGCTAGTCCGTTATCAACTTGAAAAAGTGGCACCGAGTCGGTGCTTTTTT
1|Neg_Control_Human_GA_0451|NegCtrl	ACTTACGGCACTCGCATGCC	0	0	0	0	0	0	0	0	0	n/a	NegCtrl	NegCtrl|46	1|Neg_Control_Human_GA_0451|NegCtrl	NegCtrl	ACCGACTTACGGCACTCGCATGCCGTTTAAGAGCTATGCTGGAAACAGCATAGCAAGTTTAAATAAGGCTAGTCCGTTATCAACTTGAAAAAGTGGCACCGAGTCGGTGCTTTTTT
1|Neg_Control_Human_GA_0452|NegCtrl	GATATGGCTCGAGTAATCTT	0	0	1	0	0	0	0	1818	0	n/a	NegCtrl	NegCtrl|46	1|Neg_Control_Human_GA_0452|NegCtrl	NegCtrl	ACCGGATATGGCTCGAGTAATCTTGTTTAAGAGCTATGCTGGAAACAGCATAGCAAGTTTAAATAAGGCTAGTCCGTTATCAACTTGAAAAAGTGGCACCGAGTCGGTGCTTTTTT
1|Neg_Control_Human_GA_0453|NegCtrl	GTATCCCATATCGGCACAGG	0	0	0	0	0	0	0	0	0	n/a	NegCtrl	NegCtrl|46	1|Neg_Control_Human_GA_0453|NegCtrl	NegCtrl	ACCGGTATCCCATATCGGCACAGGGTTTAAGAGCTATGCTGGAAACAGCATAGCAAGTTTAAATAAGGCTAGTCCGTTATCAACTTGAAAAAGTGGCACCGAGTCGGTGCTTTTTT
1|Neg_Control_Human_GA_0454|NegCtrl	ATGCTGCAGCTTTACGATCA	0	0	0	0	0	0	0	0	0	n/a	NegCtrl	NegCtrl|46	1|Neg_Control_Human_GA_0454|NegCtrl	NegCtrl	ACCGATGCTGCAGCTTTACGATCAGTTTAAGAGCTATGCTGGAAACAGCATAGCAAGTTTAAATAAGGCTAGTCCGTTATCAACTTGAAAAAGTGGCACCGAGTCGGTGCTTTTTT
1|Neg_Control_Human_GA_0455|NegCtrl	GAGTGATGCTTAGACTCCGT	0	0	0	0	0	0	0	0	0	n/a	NegCtrl	NegCtrl|46	1|Neg_Control_Human_GA_0455|NegCtrl	NegCtrl	ACCGGAGTGATGCTTAGACTCCGTGTTTAAGAGCTATGCTGGAAACAGCATAGCAAGTTTAAATAAGGCTAGTCCGTTATCAACTTGAAAAAGTGGCACCGAGTCGGTGCTTTTTT
1|Neg_Control_Human_GA_0456|NegCtrl	ACATACCCCCCTGGTTCAGA	3	0	21288	2	0	1	0	30150	3	n/a	NegCtrl	NegCtrl|46	1|Neg_Control_Human_GA_0456|NegCtrl	NegCtrl	ACCGACATACCCCCCTGGTTCAGAGTTTAAGAGCTATGCTGGAAACAGCATAGCAAGTTTAAATAAGGCTAGTCCGTTATCAACTTGAAAAAGTGGCACCGAGTCGGTGCTTTTTT
1|Neg_Control_Human_GA_0457|NegCtrl	GCCCCTTATGATTGTTATAG	0	0	0	0	0	0	0	0	0	n/a	NegCtrl	NegCtrl|46	1|Neg_Control_Human_GA_0457|NegCtrl	NegCtrl	ACCGGCCCCTTATGATTGTTATAGGTTTAAGAGCTATGCTGGAAACAGCATAGCAAGTTTAAATAAGGCTAGTCCGTTATCAACTTGAAAAAGTGGCACCGAGTCGGTGCTTTTTT
1|Neg_Control_Human_GA_0458|NegCtrl	AGGTCGGCCGAACATACGGT	0	0	0	0	0	0	0	0	0	n/a	NegCtrl	NegCtrl|46	1|Neg_Control_Human_GA_0458|NegCtrl	NegCtrl	ACCGAGGTCGGCCGAACATACGGTGTTTAAGAGCTATGCTGGAAACAGCATAGCAAGTTTAAATAAGGCTAGTCCGTTATCAACTTGAAAAAGTGGCACCGAGTCGGTGCTTTTTT
1|Neg_Control_Human_GA_0459|NegCtrl	ATTGCGCAATCCTTAGGATA	0	0	0	0	0	0	0	0	0	n/a	NegCtrl	NegCtrl|46	1|Neg_Control_Human_GA_0459|NegCtrl	NegCtrl	ACCGATTGCGCAATCCTTAGGATAGTTTAAGAGCTATGCTGGAAACAGCATAGCAAGTTTAAATAAGGCTAGTCCGTTATCAACTTGAAAAAGTGGCACCGAGTCGGTGCTTTTTT
1|Neg_Control_Human_GA_0460|NegCtrl	GAAGCGGGACCGTGTCTCAC	0	0	0	0	0	0	0	0	1	n/a	NegCtrl	NegCtrl|46	1|Neg_Control_Human_GA_0460|NegCtrl	NegCtrl	ACCGGAAGCGGGACCGTGTCTCACGTTTAAGAGCTATGCTGGAAACAGCATAGCAAGTTTAAATAAGGCTAGTCCGTTATCAACTTGAAAAAGTGGCACCGAGTCGGTGCTTTTTT
1|Neg_Control_Human_GA_0461|NegCtrl	GTGTATGATGCTTCGACTTA	0	0	0	0	0	0	0	0	0	n/a	NegCtrl	NegCtrl|47	1|Neg_Control_Human_GA_0461|NegCtrl	NegCtrl	ACCGGTGTATGATGCTTCGACTTAGTTTAAGAGCTATGCTGGAAACAGCATAGCAAGTTTAAATAAGGCTAGTCCGTTATCAACTTGAAAAAGTGGCACCGAGTCGGTGCTTTTTT
1|Neg_Control_Human_GA_0462|NegCtrl	CCTACTCCCGTGTGTTATCC	0	0	0	0	0	0	0	0	0	n/a	NegCtrl	NegCtrl|47	1|Neg_Control_Human_GA_0462|NegCtrl	NegCtrl	ACCGCCTACTCCCGTGTGTTATCCGTTTAAGAGCTATGCTGGAAACAGCATAGCAAGTTTAAATAAGGCTAGTCCGTTATCAACTTGAAAAAGTGGCACCGAGTCGGTGCTTTTTT
1|Neg_Control_Human_GA_0463|NegCtrl	ACAGCCCTCACGAGCCCGAA	0	0	0	0	0	0	0	0	0	n/a	NegCtrl	NegCtrl|47	1|Neg_Control_Human_GA_0463|NegCtrl	NegCtrl	ACCGACAGCCCTCACGAGCCCGAAGTTTAAGAGCTATGCTGGAAACAGCATAGCAAGTTTAAATAAGGCTAGTCCGTTATCAACTTGAAAAAGTGGCACCGAGTCGGTGCTTTTTT
1|Neg_Control_Human_GA_0464|NegCtrl	GCTGTTGTAACGGTAGATAT	0	0	0	0	0	0	0	0	0	n/a	NegCtrl	NegCtrl|47	1|Neg_Control_Human_GA_0464|NegCtrl	NegCtrl	ACCGGCTGTTGTAACGGTAGATATGTTTAAGAGCTATGCTGGAAACAGCATAGCAAGTTTAAATAAGGCTAGTCCGTTATCAACTTGAAAAAGTGGCACCGAGTCGGTGCTTTTTT
1|Neg_Control_Human_GA_0465|NegCtrl	TACGAAACATCATGGGTTCC	0	0	0	0	0	0	0	0	0	n/a	NegCtrl	NegCtrl|47	1|Neg_Control_Human_GA_0465|NegCtrl	NegCtrl	ACCGTACGAAACATCATGGGTTCCGTTTAAGAGCTATGCTGGAAACAGCATAGCAAGTTTAAATAAGGCTAGTCCGTTATCAACTTGAAAAAGTGGCACCGAGTCGGTGCTTTTTT
1|Neg_Control_Human_GA_0466|NegCtrl	CGCACGACCATTGCTGCTGC	0	0	0	0	0	0	0	0	0	n/a	NegCtrl	NegCtrl|47	1|Neg_Control_Human_GA_0466|NegCtrl	NegCtrl	ACCGCGCACGACCATTGCTGCTGCGTTTAAGAGCTATGCTGGAAACAGCATAGCAAGTTTAAATAAGGCTAGTCCGTTATCAACTTGAAAAAGTGGCACCGAGTCGGTGCTTTTTT
1|Neg_Control_Human_GA_0467|NegCtrl	CATTGCACGCCACAGCATTG	0	0	0	0	0	0	0	0	0	n/a	NegCtrl	NegCtrl|47	1|Neg_Control_Human_GA_0467|NegCtrl	NegCtrl	ACCGCATTGCACGCCACAGCATTGGTTTAAGAGCTATGCTGGAAACAGCATAGCAAGTTTAAATAAGGCTAGTCCGTTATCAACTTGAAAAAGTGGCACCGAGTCGGTGCTTTTTT
1|Neg_Control_Human_GA_0468|NegCtrl	CGATGCCCGTCTATGGCCCG	0	1	21325	0	0	0	0	0	0	n/a	NegCtrl	NegCtrl|47	1|Neg_Control_Human_GA_0468|NegCtrl	NegCtrl	ACCGCGATGCCCGTCTATGGCCCGGTTTAAGAGCTATGCTGGAAACAGCATAGCAAGTTTAAATAAGGCTAGTCCGTTATCAACTTGAAAAAGTGGCACCGAGTCGGTGCTTTTTT
1|Neg_Control_Human_GA_0469|NegCtrl	CCAGCAATACCCCGGTATGG	1	0	5878	0	0	0	0	0	0	n/a	NegCtrl	NegCtrl|47	1|Neg_Control_Human_GA_0469|NegCtrl	NegCtrl	ACCGCCAGCAATACCCCGGTATGGGTTTAAGAGCTATGCTGGAAACAGCATAGCAAGTTTAAATAAGGCTAGTCCGTTATCAACTTGAAAAAGTGGCACCGAGTCGGTGCTTTTTT
1|Neg_Control_Human_GA_0470|NegCtrl	TCGAGATGCGCAGCAGATGA	0	0	0	0	0	0	0	0	0	n/a	NegCtrl	NegCtrl|47	1|Neg_Control_Human_GA_0470|NegCtrl	NegCtrl	ACCGTCGAGATGCGCAGCAGATGAGTTTAAGAGCTATGCTGGAAACAGCATAGCAAGTTTAAATAAGGCTAGTCCGTTATCAACTTGAAAAAGTGGCACCGAGTCGGTGCTTTTTT
1|Neg_Control_Human_GA_0471|NegCtrl	ACGGGGTGAAACCATGTCGT	0	0	0	0	0	0	0	0	0	n/a	NegCtrl	NegCtrl|48	1|Neg_Control_Human_GA_0471|NegCtrl	NegCtrl	ACCGACGGGGTGAAACCATGTCGTGTTTAAGAGCTATGCTGGAAACAGCATAGCAAGTTTAAATAAGGCTAGTCCGTTATCAACTTGAAAAAGTGGCACCGAGTCGGTGCTTTTTT
1|Neg_Control_Human_GA_0472|NegCtrl	CCTTGGCGAGACGGAGGTAC	0	0	0	0	0	0	0	0	0	n/a	NegCtrl	NegCtrl|48	1|Neg_Control_Human_GA_0472|NegCtrl	NegCtrl	ACCGCCTTGGCGAGACGGAGGTACGTTTAAGAGCTATGCTGGAAACAGCATAGCAAGTTTAAATAAGGCTAGTCCGTTATCAACTTGAAAAAGTGGCACCGAGTCGGTGCTTTTTT
1|Neg_Control_Human_GA_0473|NegCtrl	CCATAGCTCTAGCGATAAAC	0	0	0	0	0	0	0	0	0	n/a	NegCtrl	NegCtrl|48	1|Neg_Control_Human_GA_0473|NegCtrl	NegCtrl	ACCGCCATAGCTCTAGCGATAAACGTTTAAGAGCTATGCTGGAAACAGCATAGCAAGTTTAAATAAGGCTAGTCCGTTATCAACTTGAAAAAGTGGCACCGAGTCGGTGCTTTTTT
1|Neg_Control_Human_GA_0474|NegCtrl	AGCTAGCGATGGCTCTAAGT	0	0	0	0	0	0	0	0	0	n/a	NegCtrl	NegCtrl|48	1|Neg_Control_Human_GA_0474|NegCtrl	NegCtrl	ACCGAGCTAGCGATGGCTCTAAGTGTTTAAGAGCTATGCTGGAAACAGCATAGCAAGTTTAAATAAGGCTAGTCCGTTATCAACTTGAAAAAGTGGCACCGAGTCGGTGCTTTTTT
1|Neg_Control_Human_GA_0475|NegCtrl	GGTCCGCGCACAAGAGCAGG	55448	1	0	0	1	1	1	9570	3	n/a	NegCtrl	NegCtrl|48	1|Neg_Control_Human_GA_0475|NegCtrl	NegCtrl	ACCGGGTCCGCGCACAAGAGCAGGGTTTAAGAGCTATGCTGGAAACAGCATAGCAAGTTTAAATAAGGCTAGTCCGTTATCAACTTGAAAAAGTGGCACCGAGTCGGTGCTTTTTT
1|Neg_Control_Human_GA_0476|NegCtrl	CAACCGGCGGGCCCCTACAA	2	0	0	0	0	2	0	26192	2	n/a	NegCtrl	NegCtrl|48	1|Neg_Control_Human_GA_0476|NegCtrl	NegCtrl	ACCGCAACCGGCGGGCCCCTACAAGTTTAAGAGCTATGCTGGAAACAGCATAGCAAGTTTAAATAAGGCTAGTCCGTTATCAACTTGAAAAAGTGGCACCGAGTCGGTGCTTTTTT
1|Neg_Control_Human_GA_0477|NegCtrl	TCCTCGATAGCTGGAATCCA	0	0	0	0	0	0	0	0	0	n/a	NegCtrl	NegCtrl|48	1|Neg_Control_Human_GA_0477|NegCtrl	NegCtrl	ACCGTCCTCGATAGCTGGAATCCAGTTTAAGAGCTATGCTGGAAACAGCATAGCAAGTTTAAATAAGGCTAGTCCGTTATCAACTTGAAAAAGTGGCACCGAGTCGGTGCTTTTTT
1|Neg_Control_Human_GA_0478|NegCtrl	TACGGATCACCAAATCTTAG	0	0	0	0	0	0	0	0	0	n/a	NegCtrl	NegCtrl|48	1|Neg_Control_Human_GA_0478|NegCtrl	NegCtrl	ACCGTACGGATCACCAAATCTTAGGTTTAAGAGCTATGCTGGAAACAGCATAGCAAGTTTAAATAAGGCTAGTCCGTTATCAACTTGAAAAAGTGGCACCGAGTCGGTGCTTTTTT
1|Neg_Control_Human_GA_0479|NegCtrl	CTCGCACCATTGAGGGTAGT	0	0	0	0	0	0	0	0	0	n/a	NegCtrl	NegCtrl|48	1|Neg_Control_Human_GA_0479|NegCtrl	NegCtrl	ACCGCTCGCACCATTGAGGGTAGTGTTTAAGAGCTATGCTGGAAACAGCATAGCAAGTTTAAATAAGGCTAGTCCGTTATCAACTTGAAAAAGTGGCACCGAGTCGGTGCTTTTTT
1|Neg_Control_Human_GA_0480|NegCtrl	TCGGGGACCACCCACGATCC	0	0	0	0	0	0	0	0	0	n/a	NegCtrl	NegCtrl|48	1|Neg_Control_Human_GA_0480|NegCtrl	NegCtrl	ACCGTCGGGGACCACCCACGATCCGTTTAAGAGCTATGCTGGAAACAGCATAGCAAGTTTAAATAAGGCTAGTCCGTTATCAACTTGAAAAAGTGGCACCGAGTCGGTGCTTTTTT
1|Neg_Control_Human_GA_0481|NegCtrl	CCTGCGGTGCACGGCTAGCC	0	0	0	0	0	0	0	0	0	n/a	NegCtrl	NegCtrl|49	1|Neg_Control_Human_GA_0481|NegCtrl	NegCtrl	ACCGCCTGCGGTGCACGGCTAGCCGTTTAAGAGCTATGCTGGAAACAGCATAGCAAGTTTAAATAAGGCTAGTCCGTTATCAACTTGAAAAAGTGGCACCGAGTCGGTGCTTTTTT
1|Neg_Control_Human_GA_0482|NegCtrl	ACCGCTCATATAGGTAAAAA	0	0	0	0	0	0	0	0	0	n/a	NegCtrl	NegCtrl|49	1|Neg_Control_Human_GA_0482|NegCtrl	NegCtrl	ACCGACCGCTCATATAGGTAAAAAGTTTAAGAGCTATGCTGGAAACAGCATAGCAAGTTTAAATAAGGCTAGTCCGTTATCAACTTGAAAAAGTGGCACCGAGTCGGTGCTTTTTT
1|Neg_Control_Human_GA_0483|NegCtrl	AGTATTGTGGTGTCGTCAAC	0	0	0	0	0	0	0	0	0	n/a	NegCtrl	NegCtrl|49	1|Neg_Control_Human_GA_0483|NegCtrl	NegCtrl	ACCGAGTATTGTGGTGTCGTCAACGTTTAAGAGCTATGCTGGAAACAGCATAGCAAGTTTAAATAAGGCTAGTCCGTTATCAACTTGAAAAAGTGGCACCGAGTCGGTGCTTTTTT
1|Neg_Control_Human_GA_0484|NegCtrl	TGACGCTCCACGTCCGGACC	0	0	0	0	0	0	0	0	0	n/a	NegCtrl	NegCtrl|49	1|Neg_Control_Human_GA_0484|NegCtrl	NegCtrl	ACCGTGACGCTCCACGTCCGGACCGTTTAAGAGCTATGCTGGAAACAGCATAGCAAGTTTAAATAAGGCTAGTCCGTTATCAACTTGAAAAAGTGGCACCGAGTCGGTGCTTTTTT
1|Neg_Control_Human_GA_0485|NegCtrl	GCTCGCAAGTATTTAAGGAC	0	0	0	0	0	0	0	0	0	n/a	NegCtrl	NegCtrl|49	1|Neg_Control_Human_GA_0485|NegCtrl	NegCtrl	ACCGGCTCGCAAGTATTTAAGGACGTTTAAGAGCTATGCTGGAAACAGCATAGCAAGTTTAAATAAGGCTAGTCCGTTATCAACTTGAAAAAGTGGCACCGAGTCGGTGCTTTTTT
1|Neg_Control_Human_GA_0486|NegCtrl	GCCAGGGTTCTTGGTCCCGA	0	0	10054	0	0	0	0	0	0	n/a	NegCtrl	NegCtrl|49	1|Neg_Control_Human_GA_0486|NegCtrl	NegCtrl	ACCGGCCAGGGTTCTTGGTCCCGAGTTTAAGAGCTATGCTGGAAACAGCATAGCAAGTTTAAATAAGGCTAGTCCGTTATCAACTTGAAAAAGTGGCACCGAGTCGGTGCTTTTTT
1|Neg_Control_Human_GA_0487|NegCtrl	GTCGCTGCGCCAGTGAGAAC	0	0	0	0	0	0	0	0	0	n/a	NegCtrl	NegCtrl|49	1|Neg_Control_Human_GA_0487|NegCtrl	NegCtrl	ACCGGTCGCTGCGCCAGTGAGAACGTTTAAGAGCTATGCTGGAAACAGCATAGCAAGTTTAAATAAGGCTAGTCCGTTATCAACTTGAAAAAGTGGCACCGAGTCGGTGCTTTTTT
1|Neg_Control_Human_GA_0488|NegCtrl	CCCGCTAACAGCCTAGATCA	0	0	0	0	0	0	0	0	0	n/a	NegCtrl	NegCtrl|49	1|Neg_Control_Human_GA_0488|NegCtrl	NegCtrl	ACCGCCCGCTAACAGCCTAGATCAGTTTAAGAGCTATGCTGGAAACAGCATAGCAAGTTTAAATAAGGCTAGTCCGTTATCAACTTGAAAAAGTGGCACCGAGTCGGTGCTTTTTT
1|Neg_Control_Human_GA_0489|NegCtrl	TTGTACGGTACTGGCTTTGT	0	0	0	0	0	0	0	0	0	n/a	NegCtrl	NegCtrl|49	1|Neg_Control_Human_GA_0489|NegCtrl	NegCtrl	ACCGTTGTACGGTACTGGCTTTGTGTTTAAGAGCTATGCTGGAAACAGCATAGCAAGTTTAAATAAGGCTAGTCCGTTATCAACTTGAAAAAGTGGCACCGAGTCGGTGCTTTTTT
1|Neg_Control_Human_GA_0490|NegCtrl	CAGGCTGCGCTTCGCAAGCT	0	0	0	0	0	0	0	0	0	n/a	NegCtrl	NegCtrl|49	1|Neg_Control_Human_GA_0490|NegCtrl	NegCtrl	ACCGCAGGCTGCGCTTCGCAAGCTGTTTAAGAGCTATGCTGGAAACAGCATAGCAAGTTTAAATAAGGCTAGTCCGTTATCAACTTGAAAAAGTGGCACCGAGTCGGTGCTTTTTT
1|Neg_Control_Human_GA_0491|NegCtrl	GCCTAGTCTCGGTAAGAGTG	0	0	0	0	0	0	0	0	0	n/a	NegCtrl	NegCtrl|50	1|Neg_Control_Human_GA_0491|NegCtrl	NegCtrl	ACCGGCCTAGTCTCGGTAAGAGTGGTTTAAGAGCTATGCTGGAAACAGCATAGCAAGTTTAAATAAGGCTAGTCCGTTATCAACTTGAAAAAGTGGCACCGAGTCGGTGCTTTTTT
1|Neg_Control_Human_GA_0492|NegCtrl	GGACGCACCATTCCGGGTGA	0	0	0	0	0	0	0	0	0	n/a	NegCtrl	NegCtrl|50	1|Neg_Control_Human_GA_0492|NegCtrl	NegCtrl	ACCGGGACGCACCATTCCGGGTGAGTTTAAGAGCTATGCTGGAAACAGCATAGCAAGTTTAAATAAGGCTAGTCCGTTATCAACTTGAAAAAGTGGCACCGAGTCGGTGCTTTTTT
1|Neg_Control_Human_GA_0493|NegCtrl	GATTGTGGTCGCTCAAAACC	0	1	28056	0	0	1	0	0	3	n/a	NegCtrl	NegCtrl|50	1|Neg_Control_Human_GA_0493|NegCtrl	NegCtrl	ACCGGATTGTGGTCGCTCAAAACCGTTTAAGAGCTATGCTGGAAACAGCATAGCAAGTTTAAATAAGGCTAGTCCGTTATCAACTTGAAAAAGTGGCACCGAGTCGGTGCTTTTTT
1|Neg_Control_Human_GA_0494|NegCtrl	CTATAACCGAATCAAAGGGT	0	0	0	0	0	0	0	0	0	n/a	NegCtrl	NegCtrl|50	1|Neg_Control_Human_GA_0494|NegCtrl	NegCtrl	ACCGCTATAACCGAATCAAAGGGTGTTTAAGAGCTATGCTGGAAACAGCATAGCAAGTTTAAATAAGGCTAGTCCGTTATCAACTTGAAAAAGTGGCACCGAGTCGGTGCTTTTTT
1|Neg_Control_Human_GA_0495|NegCtrl	AAATTGGCTTTCGTTCGTGC	0	0	0	0	0	0	0	0	0	n/a	NegCtrl	NegCtrl|50	1|Neg_Control_Human_GA_0495|NegCtrl	NegCtrl	ACCGAAATTGGCTTTCGTTCGTGCGTTTAAGAGCTATGCTGGAAACAGCATAGCAAGTTTAAATAAGGCTAGTCCGTTATCAACTTGAAAAAGTGGCACCGAGTCGGTGCTTTTTT
1|Neg_Control_Human_GA_0496|NegCtrl	TCACCTCCGAACGAACACCT	0	0	0	0	0	0	2	0	0	n/a	NegCtrl	NegCtrl|50	1|Neg_Control_Human_GA_0496|NegCtrl	NegCtrl	ACCGTCACCTCCGAACGAACACCTGTTTAAGAGCTATGCTGGAAACAGCATAGCAAGTTTAAATAAGGCTAGTCCGTTATCAACTTGAAAAAGTGGCACCGAGTCGGTGCTTTTTT
1|Neg_Control_Human_GA_0497|NegCtrl	GGAGATGCGGCCTTCTCAAA	0	0	0	0	0	0	0	0	2	n/a	NegCtrl	NegCtrl|50	1|Neg_Control_Human_GA_0497|NegCtrl	NegCtrl	ACCGGGAGATGCGGCCTTCTCAAAGTTTAAGAGCTATGCTGGAAACAGCATAGCAAGTTTAAATAAGGCTAGTCCGTTATCAACTTGAAAAAGTGGCACCGAGTCGGTGCTTTTTT
1|Neg_Control_Human_GA_0498|NegCtrl	CTTAGGATTCCGAGGTATCT	0	0	0	0	0	0	0	0	0	n/a	NegCtrl	NegCtrl|50	1|Neg_Control_Human_GA_0498|NegCtrl	NegCtrl	ACCGCTTAGGATTCCGAGGTATCTGTTTAAGAGCTATGCTGGAAACAGCATAGCAAGTTTAAATAAGGCTAGTCCGTTATCAACTTGAAAAAGTGGCACCGAGTCGGTGCTTTTTT
1|Neg_Control_Human_GA_0499|NegCtrl	GAACTGGCAAACAGGCGTGG	0	0	0	0	0	0	0	0	1	n/a	NegCtrl	NegCtrl|50	1|Neg_Control_Human_GA_0499|NegCtrl	NegCtrl	ACCGGAACTGGCAAACAGGCGTGGGTTTAAGAGCTATGCTGGAAACAGCATAGCAAGTTTAAATAAGGCTAGTCCGTTATCAACTTGAAAAAGTGGCACCGAGTCGGTGCTTTTTT
1|Neg_Control_Human_GA_0500|NegCtrl	CCTGTCGCTATCGTTAGAGA	1	0	13624	0	0	0	0	0	1	n/a	NegCtrl	NegCtrl|50	1|Neg_Control_Human_GA_0500|NegCtrl	NegCtrl	ACCGCCTGTCGCTATCGTTAGAGAGTTTAAGAGCTATGCTGGAAACAGCATAGCAAGTTTAAATAAGGCTAGTCCGTTATCAACTTGAAAAAGTGGCACCGAGTCGGTGCTTTTTT
2|sgINTRON-ALAS1_1|NegCtrlIntron	GGTGGACATCCACCCCTAAG	0	0	0	0	0	0	0	0	1	211	NegCtrlIntron	IntronCtrl|ALAS1	2|sgINTRON-ALAS1_1|IntronCtrl_ALAS1	IntronCtrl_ALAS1	ACCGGGTGGACATCCACCCCTAAGGTTTAAGAGCTATGCTGGAAACAGCATAGCAAGTTTAAATAAGGCTAGTCCGTTATCAACTTGAAAAAGTGGCACCGAGTCGGTGCTTTTTT
2|sgINTRON-ALAS1_2|NegCtrlIntron	AGCTCAGTGGTGCCGCTTAG	2	2	0	1	37800	0	0	0	1	211	NegCtrlIntron	IntronCtrl|ALAS1	2|sgINTRON-ALAS1_2|IntronCtrl_ALAS1	IntronCtrl_ALAS1	ACCGAGCTCAGTGGTGCCGCTTAGGTTTAAGAGCTATGCTGGAAACAGCATAGCAAGTTTAAATAAGGCTAGTCCGTTATCAACTTGAAAAAGTGGCACCGAGTCGGTGCTTTTTT
2|sgINTRON-ALAS1_3|NegCtrlIntron	TGCAACACAGTGGTGCCTGG	0	0	0	0	0	0	0	0	0	211	NegCtrlIntron	IntronCtrl|ALAS1	2|sgINTRON-ALAS1_3|IntronCtrl_ALAS1	IntronCtrl_ALAS1	ACCGTGCAACACAGTGGTGCCTGGGTTTAAGAGCTATGCTGGAAACAGCATAGCAAGTTTAAATAAGGCTAGTCCGTTATCAACTTGAAAAAGTGGCACCGAGTCGGTGCTTTTTT
2|sgINTRON-ALAS1_4|NegCtrlIntron	GTCAGCCACTGACCAAGACG	0	0	0	0	0	0	0	0	0	211	NegCtrlIntron	IntronCtrl|ALAS1	2|sgINTRON-ALAS1_4|IntronCtrl_ALAS1	IntronCtrl_ALAS1	ACCGGTCAGCCACTGACCAAGACGGTTTAAGAGCTATGCTGGAAACAGCATAGCAAGTTTAAATAAGGCTAGTCCGTTATCAACTTGAAAAAGTGGCACCGAGTCGGTGCTTTTTT
2|sgINTRON-ALAS1_5|NegCtrlIntron	TGAAATGATTCTGGAAAACG	0	0	0	0	0	0	0	0	0	211	NegCtrlIntron	IntronCtrl|ALAS1	2|sgINTRON-ALAS1_5|IntronCtrl_ALAS1	IntronCtrl_ALAS1	ACCGTGAAATGATTCTGGAAAACGGTTTAAGAGCTATGCTGGAAACAGCATAGCAAGTTTAAATAAGGCTAGTCCGTTATCAACTTGAAAAAGTGGCACCGAGTCGGTGCTTTTTT
2|sgINTRON-ALAS1_6|NegCtrlIntron	TGACTAAGTAGGACGCCTGG	0	0	0	0	0	46	0	0	0	211	NegCtrlIntron	IntronCtrl|ALAS1	2|sgINTRON-ALAS1_6|IntronCtrl_ALAS1	IntronCtrl_ALAS1	ACCGTGACTAAGTAGGACGCCTGGGTTTAAGAGCTATGCTGGAAACAGCATAGCAAGTTTAAATAAGGCTAGTCCGTTATCAACTTGAAAAAGTGGCACCGAGTCGGTGCTTTTTT
2|sgINTRON-ALAS1_7|NegCtrlIntron	GGCGCAGACTTGCGCGATGG	0	0	0	0	0	0	0	0	0	211	NegCtrlIntron	IntronCtrl|ALAS1	2|sgINTRON-ALAS1_7|IntronCtrl_ALAS1	IntronCtrl_ALAS1	ACCGGGCGCAGACTTGCGCGATGGGTTTAAGAGCTATGCTGGAAACAGCATAGCAAGTTTAAATAAGGCTAGTCCGTTATCAACTTGAAAAAGTGGCACCGAGTCGGTGCTTTTTT
2|sgINTRON-ALAS1_8|NegCtrlIntron	GCGCCTCGGACCTGGACTTG	0	0	0	1	0	0	0	0	0	211	NegCtrlIntron	IntronCtrl|ALAS1	2|sgINTRON-ALAS1_8|IntronCtrl_ALAS1	IntronCtrl_ALAS1	ACCGGCGCCTCGGACCTGGACTTGGTTTAAGAGCTATGCTGGAAACAGCATAGCAAGTTTAAATAAGGCTAGTCCGTTATCAACTTGAAAAAGTGGCACCGAGTCGGTGCTTTTTT
2|sgINTRON-C1orf43_1|NegCtrlIntron	GACCTTGTGATCTTCTCATG	2	1	0	0	0	0	0	0	7391	25912	NegCtrlIntron	IntronCtrl|C1orf43	2|sgINTRON-C1orf43_1|IntronCtrl_C1orf43	IntronCtrl_C1orf43	ACCGGACCTTGTGATCTTCTCATGGTTTAAGAGCTATGCTGGAAACAGCATAGCAAGTTTAAATAAGGCTAGTCCGTTATCAACTTGAAAAAGTGGCACCGAGTCGGTGCTTTTTT
2|sgINTRON-C1orf43_2|NegCtrlIntron	GATTGACGTGGTGGTGAAGG	0	0	0	0	0	0	0	0	0	25912	NegCtrlIntron	IntronCtrl|C1orf43	2|sgINTRON-C1orf43_2|IntronCtrl_C1orf43	IntronCtrl_C1orf43	ACCGGATTGACGTGGTGGTGAAGGGTTTAAGAGCTATGCTGGAAACAGCATAGCAAGTTTAAATAAGGCTAGTCCGTTATCAACTTGAAAAAGTGGCACCGAGTCGGTGCTTTTTT
2|sgINTRON-C1orf43_3|NegCtrlIntron	TGATTGACGTGGTGGTGAAG	2	1	0	1	0	0	1	0	22096	25912	NegCtrlIntron	IntronCtrl|C1orf43	2|sgINTRON-C1orf43_3|IntronCtrl_C1orf43	IntronCtrl_C1orf43	ACCGTGATTGACGTGGTGGTGAAGGTTTAAGAGCTATGCTGGAAACAGCATAGCAAGTTTAAATAAGGCTAGTCCGTTATCAACTTGAAAAAGTGGCACCGAGTCGGTGCTTTTTT
2|sgINTRON-C1orf43_4|NegCtrlIntron	AGTTGGGCAGATAACACTTG	1	1	1	0	0	3	2	26488	8	25912	NegCtrlIntron	IntronCtrl|C1orf43	2|sgINTRON-C1orf43_4|IntronCtrl_C1orf43	IntronCtrl_C1orf43	ACCGAGTTGGGCAGATAACACTTGGTTTAAGAGCTATGCTGGAAACAGCATAGCAAGTTTAAATAAGGCTAGTCCGTTATCAACTTGAAAAAGTGGCACCGAGTCGGTGCTTTTTT
2|sgINTRON-C1orf43_5|NegCtrlIntron	GTACATGAAAAGGCTCTAGG	2	3	21849	0	1	1	0	0	12454	25912	NegCtrlIntron	IntronCtrl|C1orf43	2|sgINTRON-C1orf43_5|IntronCtrl_C1orf43	IntronCtrl_C1orf43	ACCGGTACATGAAAAGGCTCTAGGGTTTAAGAGCTATGCTGGAAACAGCATAGCAAGTTTAAATAAGGCTAGTCCGTTATCAACTTGAAAAAGTGGCACCGAGTCGGTGCTTTTTT
2|sgINTRON-C1orf43_6|NegCtrlIntron	TGTCAGCAAAGAACAAAGAG	0	0	0	0	0	0	0	0	0	25912	NegCtrlIntron	IntronCtrl|C1orf43	2|sgINTRON-C1orf43_6|IntronCtrl_C1orf43	IntronCtrl_C1orf43	ACCGTGTCAGCAAAGAACAAAGAGGTTTAAGAGCTATGCTGGAAACAGCATAGCAAGTTTAAATAAGGCTAGTCCGTTATCAACTTGAAAAAGTGGCACCGAGTCGGTGCTTTTTT
2|sgINTRON-C1orf43_7|NegCtrlIntron	GTACAGTGCTCTAGGAGTTG	0	0	0	0	0	0	0	0	2	25912	NegCtrlIntron	IntronCtrl|C1orf43	2|sgINTRON-C1orf43_7|IntronCtrl_C1orf43	IntronCtrl_C1orf43	ACCGGTACAGTGCTCTAGGAGTTGGTTTAAGAGCTATGCTGGAAACAGCATAGCAAGTTTAAATAAGGCTAGTCCGTTATCAACTTGAAAAAGTGGCACCGAGTCGGTGCTTTTTT
2|sgINTRON-C1orf43_8|NegCtrlIntron	AGGGTGGAAAATTCAGCCAG	0	0	0	0	0	0	0	0	1	25912	NegCtrlIntron	IntronCtrl|C1orf43	2|sgINTRON-C1orf43_8|IntronCtrl_C1orf43	IntronCtrl_C1orf43	ACCGAGGGTGGAAAATTCAGCCAGGTTTAAGAGCTATGCTGGAAACAGCATAGCAAGTTTAAATAAGGCTAGTCCGTTATCAACTTGAAAAAGTGGCACCGAGTCGGTGCTTTTTT
2|sgINTRON-DMD_1|NegCtrlIntron	TGCCAGTGCCTTCTGAGTAG	0	0	0	0	0	0	0	0	0	1756	NegCtrlIntron	IntronCtrl|DMD	2|sgINTRON-DMD_1|IntronCtrl_DMD	IntronCtrl_DMD	ACCGTGCCAGTGCCTTCTGAGTAGGTTTAAGAGCTATGCTGGAAACAGCATAGCAAGTTTAAATAAGGCTAGTCCGTTATCAACTTGAAAAAGTGGCACCGAGTCGGTGCTTTTTT
2|sgINTRON-DMD_2|NegCtrlIntron	GTCAATTATCCAAGACCATG	13	4	1	0	3	1	1	0	52999	1756	NegCtrlIntron	IntronCtrl|DMD	2|sgINTRON-DMD_2|IntronCtrl_DMD	IntronCtrl_DMD	ACCGGTCAATTATCCAAGACCATGGTTTAAGAGCTATGCTGGAAACAGCATAGCAAGTTTAAATAAGGCTAGTCCGTTATCAACTTGAAAAAGTGGCACCGAGTCGGTGCTTTTTT
2|sgINTRON-DMD_3|NegCtrlIntron	GCTCTGAGGGTTTCTCTTAG	61	65319	8	10	4	9	2	13	488166	1756	NegCtrlIntron	IntronCtrl|DMD	2|sgINTRON-DMD_3|IntronCtrl_DMD	IntronCtrl_DMD	ACCGGCTCTGAGGGTTTCTCTTAGGTTTAAGAGCTATGCTGGAAACAGCATAGCAAGTTTAAATAAGGCTAGTCCGTTATCAACTTGAAAAAGTGGCACCGAGTCGGTGCTTTTTT
2|sgINTRON-DMD_4|NegCtrlIntron	GGTACACAATCTTGCATTGG	0	0	0	0	0	0	0	0	1	1756	NegCtrlIntron	IntronCtrl|DMD	2|sgINTRON-DMD_4|IntronCtrl_DMD	IntronCtrl_DMD	ACCGGGTACACAATCTTGCATTGGGTTTAAGAGCTATGCTGGAAACAGCATAGCAAGTTTAAATAAGGCTAGTCCGTTATCAACTTGAAAAAGTGGCACCGAGTCGGTGCTTTTTT
2|sgINTRON-DMD_5|NegCtrlIntron	GGGTAAAAGTAGCAAGTCAG	0	0	0	0	0	0	0	0	0	1756	NegCtrlIntron	IntronCtrl|DMD	2|sgINTRON-DMD_5|IntronCtrl_DMD	IntronCtrl_DMD	ACCGGGGTAAAAGTAGCAAGTCAGGTTTAAGAGCTATGCTGGAAACAGCATAGCAAGTTTAAATAAGGCTAGTCCGTTATCAACTTGAAAAAGTGGCACCGAGTCGGTGCTTTTTT
2|sgINTRON-DMD_6|NegCtrlIntron	GTGCTTACTATGTTTCACTG	0	0	0	0	0	0	0	0	0	1756	NegCtrlIntron	IntronCtrl|DMD	2|sgINTRON-DMD_6|IntronCtrl_DMD	IntronCtrl_DMD	ACCGGTGCTTACTATGTTTCACTGGTTTAAGAGCTATGCTGGAAACAGCATAGCAAGTTTAAATAAGGCTAGTCCGTTATCAACTTGAAAAAGTGGCACCGAGTCGGTGCTTTTTT
2|sgINTRON-DMD_7|NegCtrlIntron	GTTTCACTGGGGTAGGAATG	0	0	0	0	0	0	0	0	0	1756	NegCtrlIntron	IntronCtrl|DMD	2|sgINTRON-DMD_7|IntronCtrl_DMD	IntronCtrl_DMD	ACCGGTTTCACTGGGGTAGGAATGGTTTAAGAGCTATGCTGGAAACAGCATAGCAAGTTTAAATAAGGCTAGTCCGTTATCAACTTGAAAAAGTGGCACCGAGTCGGTGCTTTTTT
2|sgINTRON-DMD_8|NegCtrlIntron	AGTACGGAGCTATCACGTAG	0	0	0	0	0	0	0	0	0	1756	NegCtrlIntron	IntronCtrl|DMD	2|sgINTRON-DMD_8|IntronCtrl_DMD	IntronCtrl_DMD	ACCGAGTACGGAGCTATCACGTAGGTTTAAGAGCTATGCTGGAAACAGCATAGCAAGTTTAAATAAGGCTAGTCCGTTATCAACTTGAAAAAGTGGCACCGAGTCGGTGCTTTTTT
2|sgINTRON-GPI_1|NegCtrlIntron	AGATCTTACCTCCTTAGACA	0	0	0	0	0	0	0	0	0	2821	NegCtrlIntron	IntronCtrl|GPI	2|sgINTRON-GPI_1|IntronCtrl_GPI	IntronCtrl_GPI	ACCGAGATCTTACCTCCTTAGACAGTTTAAGAGCTATGCTGGAAACAGCATAGCAAGTTTAAATAAGGCTAGTCCGTTATCAACTTGAAAAAGTGGCACCGAGTCGGTGCTTTTTT
2|sgINTRON-GPI_2|NegCtrlIntron	TGGAAGCCCACTGAGGCAGG	0	0	0	0	0	0	0	0	0	2821	NegCtrlIntron	IntronCtrl|GPI	2|sgINTRON-GPI_2|IntronCtrl_GPI	IntronCtrl_GPI	ACCGTGGAAGCCCACTGAGGCAGGGTTTAAGAGCTATGCTGGAAACAGCATAGCAAGTTTAAATAAGGCTAGTCCGTTATCAACTTGAAAAAGTGGCACCGAGTCGGTGCTTTTTT
2|sgINTRON-GPI_3|NegCtrlIntron	CGTTGCCTGTGCTAGAAATG	0	0	0	0	0	0	0	0	0	2821	NegCtrlIntron	IntronCtrl|GPI	2|sgINTRON-GPI_3|IntronCtrl_GPI	IntronCtrl_GPI	ACCGCGTTGCCTGTGCTAGAAATGGTTTAAGAGCTATGCTGGAAACAGCATAGCAAGTTTAAATAAGGCTAGTCCGTTATCAACTTGAAAAAGTGGCACCGAGTCGGTGCTTTTTT
2|sgINTRON-GPI_4|NegCtrlIntron	GCCTGTGCTAGAAATGTGGG	0	0	0	0	0	0	0	0	0	2821	NegCtrlIntron	IntronCtrl|GPI	2|sgINTRON-GPI_4|IntronCtrl_GPI	IntronCtrl_GPI	ACCGGCCTGTGCTAGAAATGTGGGGTTTAAGAGCTATGCTGGAAACAGCATAGCAAGTTTAAATAAGGCTAGTCCGTTATCAACTTGAAAAAGTGGCACCGAGTCGGTGCTTTTTT
2|sgINTRON-GPI_5|NegCtrlIntron	GCCTGTCAGTGTCCAGGAGG	0	0	0	0	0	0	0	0	0	2821	NegCtrlIntron	IntronCtrl|GPI	2|sgINTRON-GPI_5|IntronCtrl_GPI	IntronCtrl_GPI	ACCGGCCTGTCAGTGTCCAGGAGGGTTTAAGAGCTATGCTGGAAACAGCATAGCAAGTTTAAATAAGGCTAGTCCGTTATCAACTTGAAAAAGTGGCACCGAGTCGGTGCTTTTTT
2|sgINTRON-GPI_6|NegCtrlIntron	GGATCTGTCAGTACCACCTG	0	2	0	41856	1	0	27	0	0	2821	NegCtrlIntron	IntronCtrl|GPI	2|sgINTRON-GPI_6|IntronCtrl_GPI	IntronCtrl_GPI	ACCGGGATCTGTCAGTACCACCTGGTTTAAGAGCTATGCTGGAAACAGCATAGCAAGTTTAAATAAGGCTAGTCCGTTATCAACTTGAAAAAGTGGCACCGAGTCGGTGCTTTTTT
2|sgINTRON-GPI_7|NegCtrlIntron	TGGGCCACTGTTCAAGCAGG	0	0	0	0	0	0	0	0	0	2821	NegCtrlIntron	IntronCtrl|GPI	2|sgINTRON-GPI_7|IntronCtrl_GPI	IntronCtrl_GPI	ACCGTGGGCCACTGTTCAAGCAGGGTTTAAGAGCTATGCTGGAAACAGCATAGCAAGTTTAAATAAGGCTAGTCCGTTATCAACTTGAAAAAGTGGCACCGAGTCGGTGCTTTTTT
2|sgINTRON-GPI_8|NegCtrlIntron	GGTCTTCCCAATGTTTGAGG	0	0	1	0	43141	2	1	1	0	2821	NegCtrlIntron	IntronCtrl|GPI	2|sgINTRON-GPI_8|IntronCtrl_GPI	IntronCtrl_GPI	ACCGGGTCTTCCCAATGTTTGAGGGTTTAAGAGCTATGCTGGAAACAGCATAGCAAGTTTAAATAAGGCTAGTCCGTTATCAACTTGAAAAAGTGGCACCGAGTCGGTGCTTTTTT
2|sgINTRON-HBG1_1|NegCtrlIntron	GCCAGTGACTAGTGCTTGAA	0	0	0	0	0	0	0	0	0	3047	NegCtrlIntron	IntronCtrl|HBG1	2|sgINTRON-HBG1_1|IntronCtrl_HBG1	IntronCtrl_HBG1	ACCGGCCAGTGACTAGTGCTTGAAGTTTAAGAGCTATGCTGGAAACAGCATAGCAAGTTTAAATAAGGCTAGTCCGTTATCAACTTGAAAAAGTGGCACCGAGTCGGTGCTTTTTT
2|sgINTRON-HBG1_2|NegCtrlIntron	GGCCAGTGACTAGTGCTTGA	1	14539	0	0	0	0	0	0	3	3047	NegCtrlIntron	IntronCtrl|HBG1	2|sgINTRON-HBG1_2|IntronCtrl_HBG1	IntronCtrl_HBG1	ACCGGGCCAGTGACTAGTGCTTGAGTTTAAGAGCTATGCTGGAAACAGCATAGCAAGTTTAAATAAGGCTAGTCCGTTATCAACTTGAAAAAGTGGCACCGAGTCGGTGCTTTTTT
2|sgINTRON-HBG1_3|NegCtrlIntron	GTCTTCAGCCTACAACATAC	0	0	0	0	0	0	0	0	0	3047	NegCtrlIntron	IntronCtrl|HBG1	2|sgINTRON-HBG1_3|IntronCtrl_HBG1	IntronCtrl_HBG1	ACCGGTCTTCAGCCTACAACATACGTTTAAGAGCTATGCTGGAAACAGCATAGCAAGTTTAAATAAGGCTAGTCCGTTATCAACTTGAAAAAGTGGCACCGAGTCGGTGCTTTTTT
2|sgINTRON-HBG1_4|NegCtrlIntron	GATTTTTAGAGGCACTCCTT	0	0	0	0	0	0	0	0	0	3047	NegCtrlIntron	IntronCtrl|HBG1	2|sgINTRON-HBG1_4|IntronCtrl_HBG1	IntronCtrl_HBG1	ACCGGATTTTTAGAGGCACTCCTTGTTTAAGAGCTATGCTGGAAACAGCATAGCAAGTTTAAATAAGGCTAGTCCGTTATCAACTTGAAAAAGTGGCACCGAGTCGGTGCTTTTTT
2|sgINTRON-HBG1_5|NegCtrlIntron	TGGTAATGTTTTAGGGCCTA	0	0	0	0	0	0	0	0	0	3047	NegCtrlIntron	IntronCtrl|HBG1	2|sgINTRON-HBG1_5|IntronCtrl_HBG1	IntronCtrl_HBG1	ACCGTGGTAATGTTTTAGGGCCTAGTTTAAGAGCTATGCTGGAAACAGCATAGCAAGTTTAAATAAGGCTAGTCCGTTATCAACTTGAAAAAGTGGCACCGAGTCGGTGCTTTTTT
2|sgINTRON-HBG1_6|NegCtrlIntron	AGGCCCTAAAACATTACCAC	0	0	0	2	0	0	0	0	0	3047	NegCtrlIntron	IntronCtrl|HBG1	2|sgINTRON-HBG1_6|IntronCtrl_HBG1	IntronCtrl_HBG1	ACCGAGGCCCTAAAACATTACCACGTTTAAGAGCTATGCTGGAAACAGCATAGCAAGTTTAAATAAGGCTAGTCCGTTATCAACTTGAAAAAGTGGCACCGAGTCGGTGCTTTTTT
2|sgINTRON-HBG1_7|NegCtrlIntron	GGCCCTAAAACATTACCACT	0	0	0	0	0	0	0	0	0	3047	NegCtrlIntron	IntronCtrl|HBG1	2|sgINTRON-HBG1_7|IntronCtrl_HBG1	IntronCtrl_HBG1	ACCGGGCCCTAAAACATTACCACTGTTTAAGAGCTATGCTGGAAACAGCATAGCAAGTTTAAATAAGGCTAGTCCGTTATCAACTTGAAAAAGTGGCACCGAGTCGGTGCTTTTTT
2|sgINTRON-HBG1_8|NegCtrlIntron	GACCCAGTGGTAATGTTTTA	0	0	0	0	0	0	0	0	0	3047	NegCtrlIntron	IntronCtrl|HBG1	2|sgINTRON-HBG1_8|IntronCtrl_HBG1	IntronCtrl_HBG1	ACCGGACCCAGTGGTAATGTTTTAGTTTAAGAGCTATGCTGGAAACAGCATAGCAAGTTTAAATAAGGCTAGTCCGTTATCAACTTGAAAAAGTGGCACCGAGTCGGTGCTTTTTT
2|sgINTRON-RAB7A_1|NegCtrlIntron	GGTTGTGGACAGAACTCTTG	0	0	0	0	0	0	0	0	0	7879	NegCtrlIntron	IntronCtrl|RAB7A	2|sgINTRON-RAB7A_1|IntronCtrl_RAB7A	IntronCtrl_RAB7A	ACCGGGTTGTGGACAGAACTCTTGGTTTAAGAGCTATGCTGGAAACAGCATAGCAAGTTTAAATAAGGCTAGTCCGTTATCAACTTGAAAAAGTGGCACCGAGTCGGTGCTTTTTT
2|sgINTRON-RAB7A_2|NegCtrlIntron	GGCAAATGGTTTAACCTAAG	0	0	0	0	0	0	0	0	0	7879	NegCtrlIntron	IntronCtrl|RAB7A	2|sgINTRON-RAB7A_2|IntronCtrl_RAB7A	IntronCtrl_RAB7A	ACCGGGCAAATGGTTTAACCTAAGGTTTAAGAGCTATGCTGGAAACAGCATAGCAAGTTTAAATAAGGCTAGTCCGTTATCAACTTGAAAAAGTGGCACCGAGTCGGTGCTTTTTT
2|sgINTRON-RAB7A_3|NegCtrlIntron	TGGCAGGAATTCAGTGTTAG	0	0	0	0	0	0	0	0	0	7879	NegCtrlIntron	IntronCtrl|RAB7A	2|sgINTRON-RAB7A_3|IntronCtrl_RAB7A	IntronCtrl_RAB7A	ACCGTGGCAGGAATTCAGTGTTAGGTTTAAGAGCTATGCTGGAAACAGCATAGCAAGTTTAAATAAGGCTAGTCCGTTATCAACTTGAAAAAGTGGCACCGAGTCGGTGCTTTTTT
2|sgINTRON-RAB7A_4|NegCtrlIntron	GACTACCTAAAAGTTGTCTG	0	0	0	0	0	0	0	0	0	7879	NegCtrlIntron	IntronCtrl|RAB7A	2|sgINTRON-RAB7A_4|IntronCtrl_RAB7A	IntronCtrl_RAB7A	ACCGGACTACCTAAAAGTTGTCTGGTTTAAGAGCTATGCTGGAAACAGCATAGCAAGTTTAAATAAGGCTAGTCCGTTATCAACTTGAAAAAGTGGCACCGAGTCGGTGCTTTTTT
2|sgINTRON-RAB7A_5|NegCtrlIntron	GTGCACTGGGTGATCTTGTG	0	0	0	0	0	0	0	0	0	7879	NegCtrlIntron	IntronCtrl|RAB7A	2|sgINTRON-RAB7A_5|IntronCtrl_RAB7A	IntronCtrl_RAB7A	ACCGGTGCACTGGGTGATCTTGTGGTTTAAGAGCTATGCTGGAAACAGCATAGCAAGTTTAAATAAGGCTAGTCCGTTATCAACTTGAAAAAGTGGCACCGAGTCGGTGCTTTTTT
2|sgINTRON-RAB7A_6|NegCtrlIntron	GGGTGATCTTGTGAGGCAGG	0	0	0	0	0	0	0	0	0	7879	NegCtrlIntron	IntronCtrl|RAB7A	2|sgINTRON-RAB7A_6|IntronCtrl_RAB7A	IntronCtrl_RAB7A	ACCGGGGTGATCTTGTGAGGCAGGGTTTAAGAGCTATGCTGGAAACAGCATAGCAAGTTTAAATAAGGCTAGTCCGTTATCAACTTGAAAAAGTGGCACCGAGTCGGTGCTTTTTT
2|sgINTRON-RAB7A_7|NegCtrlIntron	TGACTCATAAGTCATCATCG	0	0	0	0	0	0	0	0	1	7879	NegCtrlIntron	IntronCtrl|RAB7A	2|sgINTRON-RAB7A_7|IntronCtrl_RAB7A	IntronCtrl_RAB7A	ACCGTGACTCATAAGTCATCATCGGTTTAAGAGCTATGCTGGAAACAGCATAGCAAGTTTAAATAAGGCTAGTCCGTTATCAACTTGAAAAAGTGGCACCGAGTCGGTGCTTTTTT
2|sgINTRON-RAB7A_8|NegCtrlIntron	GGTGGCTGCCCTCCCCAGCG	0	0	0	0	0	0	0	0	0	7879	NegCtrlIntron	IntronCtrl|RAB7A	2|sgINTRON-RAB7A_8|IntronCtrl_RAB7A	IntronCtrl_RAB7A	ACCGGGTGGCTGCCCTCCCCAGCGGTTTAAGAGCTATGCTGGAAACAGCATAGCAAGTTTAAATAAGGCTAGTCCGTTATCAACTTGAAAAAGTGGCACCGAGTCGGTGCTTTTTT
2|sgINTRON-REEP5_1|NegCtrlIntron	GCTTGAGAAAGTCAAGGCTG	0	0	0	0	0	0	0	0	0	7905	NegCtrlIntron	IntronCtrl|REEP5	2|sgINTRON-REEP5_1|IntronCtrl_REEP5	IntronCtrl_REEP5	ACCGGCTTGAGAAAGTCAAGGCTGGTTTAAGAGCTATGCTGGAAACAGCATAGCAAGTTTAAATAAGGCTAGTCCGTTATCAACTTGAAAAAGTGGCACCGAGTCGGTGCTTTTTT
2|sgINTRON-REEP5_2|NegCtrlIntron	GTAACCTCACAACTTAGAAG	0	0	1	25364	0	1	22	0	0	7905	NegCtrlIntron	IntronCtrl|REEP5	2|sgINTRON-REEP5_2|IntronCtrl_REEP5	IntronCtrl_REEP5	ACCGGTAACCTCACAACTTAGAAGGTTTAAGAGCTATGCTGGAAACAGCATAGCAAGTTTAAATAAGGCTAGTCCGTTATCAACTTGAAAAAGTGGCACCGAGTCGGTGCTTTTTT
2|sgINTRON-REEP5_3|NegCtrlIntron	TGCCTTTTCCTAGGTAAAGG	0	0	0	0	0	0	0	0	0	7905	NegCtrlIntron	IntronCtrl|REEP5	2|sgINTRON-REEP5_3|IntronCtrl_REEP5	IntronCtrl_REEP5	ACCGTGCCTTTTCCTAGGTAAAGGGTTTAAGAGCTATGCTGGAAACAGCATAGCAAGTTTAAATAAGGCTAGTCCGTTATCAACTTGAAAAAGTGGCACCGAGTCGGTGCTTTTTT
2|sgINTRON-REEP5_4|NegCtrlIntron	AGCAGCTGAAATATAAGTGG	0	0	0	0	0	0	0	0	0	7905	NegCtrlIntron	IntronCtrl|REEP5	2|sgINTRON-REEP5_4|IntronCtrl_REEP5	IntronCtrl_REEP5	ACCGAGCAGCTGAAATATAAGTGGGTTTAAGAGCTATGCTGGAAACAGCATAGCAAGTTTAAATAAGGCTAGTCCGTTATCAACTTGAAAAAGTGGCACCGAGTCGGTGCTTTTTT
2|sgINTRON-REEP5_5|NegCtrlIntron	GGGCTCTAAAGCAGTTGTGG	0	0	0	0	0	0	0	0	0	7905	NegCtrlIntron	IntronCtrl|REEP5	2|sgINTRON-REEP5_5|IntronCtrl_REEP5	IntronCtrl_REEP5	ACCGGGGCTCTAAAGCAGTTGTGGGTTTAAGAGCTATGCTGGAAACAGCATAGCAAGTTTAAATAAGGCTAGTCCGTTATCAACTTGAAAAAGTGGCACCGAGTCGGTGCTTTTTT
2|sgINTRON-REEP5_6|NegCtrlIntron	GTATGAAGCACAAGCCAATG	0	0	0	0	0	0	0	0	0	7905	NegCtrlIntron	IntronCtrl|REEP5	2|sgINTRON-REEP5_6|IntronCtrl_REEP5	IntronCtrl_REEP5	ACCGGTATGAAGCACAAGCCAATGGTTTAAGAGCTATGCTGGAAACAGCATAGCAAGTTTAAATAAGGCTAGTCCGTTATCAACTTGAAAAAGTGGCACCGAGTCGGTGCTTTTTT
2|sgINTRON-REEP5_7|NegCtrlIntron	TGCCTGCGCTTTGCCTTCTG	0	0	0	0	0	0	0	0	0	7905	NegCtrlIntron	IntronCtrl|REEP5	2|sgINTRON-REEP5_7|IntronCtrl_REEP5	IntronCtrl_REEP5	ACCGTGCCTGCGCTTTGCCTTCTGGTTTAAGAGCTATGCTGGAAACAGCATAGCAAGTTTAAATAAGGCTAGTCCGTTATCAACTTGAAAAAGTGGCACCGAGTCGGTGCTTTTTT
2|sgINTRON-REEP5_8|NegCtrlIntron	GGGGTGTATTTGTTTTCTTG	0	0	0	0	0	0	0	0	0	7905	NegCtrlIntron	IntronCtrl|REEP5	2|sgINTRON-REEP5_8|IntronCtrl_REEP5	IntronCtrl_REEP5	ACCGGGGGTGTATTTGTTTTCTTGGTTTAAGAGCTATGCTGGAAACAGCATAGCAAGTTTAAATAAGGCTAGTCCGTTATCAACTTGAAAAAGTGGCACCGAGTCGGTGCTTTTTT
2|sgINTRON-SNRPD3_1|NegCtrlIntron	GCATACAAATACAAGCAGGG	0	0	0	0	0	0	0	0	0	6634	NegCtrlIntron	IntronCtrl|SNRPD3	2|sgINTRON-SNRPD3_1|IntronCtrl_SNRPD3	IntronCtrl_SNRPD3	ACCGGCATACAAATACAAGCAGGGGTTTAAGAGCTATGCTGGAAACAGCATAGCAAGTTTAAATAAGGCTAGTCCGTTATCAACTTGAAAAAGTGGCACCGAGTCGGTGCTTTTTT
2|sgINTRON-SNRPD3_2|NegCtrlIntron	AGGTTTTGATAGACCCAGTG	0	0	0	0	0	0	0	0	0	6634	NegCtrlIntron	IntronCtrl|SNRPD3	2|sgINTRON-SNRPD3_2|IntronCtrl_SNRPD3	IntronCtrl_SNRPD3	ACCGAGGTTTTGATAGACCCAGTGGTTTAAGAGCTATGCTGGAAACAGCATAGCAAGTTTAAATAAGGCTAGTCCGTTATCAACTTGAAAAAGTGGCACCGAGTCGGTGCTTTTTT
2|sgINTRON-SNRPD3_3|NegCtrlIntron	GAATAAGAGCCAGCAGACTG	0	0	0	0	0	0	0	0	0	6634	NegCtrlIntron	IntronCtrl|SNRPD3	2|sgINTRON-SNRPD3_3|IntronCtrl_SNRPD3	IntronCtrl_SNRPD3	ACCGGAATAAGAGCCAGCAGACTGGTTTAAGAGCTATGCTGGAAACAGCATAGCAAGTTTAAATAAGGCTAGTCCGTTATCAACTTGAAAAAGTGGCACCGAGTCGGTGCTTTTTT
2|sgINTRON-SNRPD3_4|NegCtrlIntron	TGTGGCGTAGCTAAAGCTGG	0	0	0	0	0	0	0	0	0	6634	NegCtrlIntron	IntronCtrl|SNRPD3	2|sgINTRON-SNRPD3_4|IntronCtrl_SNRPD3	IntronCtrl_SNRPD3	ACCGTGTGGCGTAGCTAAAGCTGGGTTTAAGAGCTATGCTGGAAACAGCATAGCAAGTTTAAATAAGGCTAGTCCGTTATCAACTTGAAAAAGTGGCACCGAGTCGGTGCTTTTTT
2|sgINTRON-SNRPD3_5|NegCtrlIntron	GGCGTAGCTAAAGCTGGTGG	0	0	0	0	0	0	0	0	0	6634	NegCtrlIntron	IntronCtrl|SNRPD3	2|sgINTRON-SNRPD3_5|IntronCtrl_SNRPD3	IntronCtrl_SNRPD3	ACCGGGCGTAGCTAAAGCTGGTGGGTTTAAGAGCTATGCTGGAAACAGCATAGCAAGTTTAAATAAGGCTAGTCCGTTATCAACTTGAAAAAGTGGCACCGAGTCGGTGCTTTTTT
2|sgINTRON-SNRPD3_6|NegCtrlIntron	TGGGGTGGGACAAAATGTGG	0	0	0	0	0	0	0	0	0	6634	NegCtrlIntron	IntronCtrl|SNRPD3	2|sgINTRON-SNRPD3_6|IntronCtrl_SNRPD3	IntronCtrl_SNRPD3	ACCGTGGGGTGGGACAAAATGTGGGTTTAAGAGCTATGCTGGAAACAGCATAGCAAGTTTAAATAAGGCTAGTCCGTTATCAACTTGAAAAAGTGGCACCGAGTCGGTGCTTTTTT
2|sgINTRON-SNRPD3_7|NegCtrlIntron	GCTGTCCCCCACCATTGGTC	1	25832	0	0	0	0	0	0	2	6634	NegCtrlIntron	IntronCtrl|SNRPD3	2|sgINTRON-SNRPD3_7|IntronCtrl_SNRPD3	IntronCtrl_SNRPD3	ACCGGCTGTCCCCCACCATTGGTCGTTTAAGAGCTATGCTGGAAACAGCATAGCAAGTTTAAATAAGGCTAGTCCGTTATCAACTTGAAAAAGTGGCACCGAGTCGGTGCTTTTTT
2|sgINTRON-SNRPD3_8|NegCtrlIntron	AGGCCTCTACATCCTGTTAC	0	0	0	0	0	0	0	0	0	6634	NegCtrlIntron	IntronCtrl|SNRPD3	2|sgINTRON-SNRPD3_8|IntronCtrl_SNRPD3	IntronCtrl_SNRPD3	ACCGAGGCCTCTACATCCTGTTACGTTTAAGAGCTATGCTGGAAACAGCATAGCAAGTTTAAATAAGGCTAGTCCGTTATCAACTTGAAAAAGTGGCACCGAGTCGGTGCTTTTTT
2|sgINTRON-UBC_1|NegCtrlIntron	GGTTTTGAACTATGCGCTCG	0	0	0	0	0	0	0	0	0	7316	NegCtrlIntron	IntronCtrl|UBC	2|sgINTRON-UBC_1|IntronCtrl_UBC	IntronCtrl_UBC	ACCGGGTTTTGAACTATGCGCTCGGTTTAAGAGCTATGCTGGAAACAGCATAGCAAGTTTAAATAAGGCTAGTCCGTTATCAACTTGAAAAAGTGGCACCGAGTCGGTGCTTTTTT
2|sgINTRON-UBC_2|NegCtrlIntron	GGCGCCGGACCTCTGGTGAG	0	0	0	0	0	0	0	0	0	7316	NegCtrlIntron	IntronCtrl|UBC	2|sgINTRON-UBC_2|IntronCtrl_UBC	IntronCtrl_UBC	ACCGGGCGCCGGACCTCTGGTGAGGTTTAAGAGCTATGCTGGAAACAGCATAGCAAGTTTAAATAAGGCTAGTCCGTTATCAACTTGAAAAAGTGGCACCGAGTCGGTGCTTTTTT
2|sgINTRON-UBC_3|NegCtrlIntron	GCCACCTGCCGGTAGGTGTG	0	0	0	0	0	0	0	0	0	7316	NegCtrlIntron	IntronCtrl|UBC	2|sgINTRON-UBC_3|IntronCtrl_UBC	IntronCtrl_UBC	ACCGGCCACCTGCCGGTAGGTGTGGTTTAAGAGCTATGCTGGAAACAGCATAGCAAGTTTAAATAAGGCTAGTCCGTTATCAACTTGAAAAAGTGGCACCGAGTCGGTGCTTTTTT
2|sgINTRON-UBC_4|NegCtrlIntron	TGTTGGCTTATAATGCAGGG	0	0	0	0	0	0	0	0	0	7316	NegCtrlIntron	IntronCtrl|UBC	2|sgINTRON-UBC_4|IntronCtrl_UBC	IntronCtrl_UBC	ACCGTGTTGGCTTATAATGCAGGGGTTTAAGAGCTATGCTGGAAACAGCATAGCAAGTTTAAATAAGGCTAGTCCGTTATCAACTTGAAAAAGTGGCACCGAGTCGGTGCTTTTTT
2|sgINTRON-UBC_5|NegCtrlIntron	GGTGACGTCACGACACGACG	9	6	6414	3	2	37047	1	4	75361	7316	NegCtrlIntron	IntronCtrl|UBC	2|sgINTRON-UBC_5|IntronCtrl_UBC	IntronCtrl_UBC	ACCGGGTGACGTCACGACACGACGGTTTAAGAGCTATGCTGGAAACAGCATAGCAAGTTTAAATAAGGCTAGTCCGTTATCAACTTGAAAAAGTGGCACCGAGTCGGTGCTTTTTT
2|sgINTRON-UBC_6|NegCtrlIntron	TGCGGGGGCGGCAGTTATGG	1	3	2	2	2	127109	2	6	1	7316	NegCtrlIntron	IntronCtrl|UBC	2|sgINTRON-UBC_6|IntronCtrl_UBC	IntronCtrl_UBC	ACCGTGCGGGGGCGGCAGTTATGGGTTTAAGAGCTATGCTGGAAACAGCATAGCAAGTTTAAATAAGGCTAGTCCGTTATCAACTTGAAAAAGTGGCACCGAGTCGGTGCTTTTTT
2|sgINTRON-UBC_7|NegCtrlIntron	CGGTTTGTCGTCTGTTGCGG	0	0	0	0	0	0	0	0	0	7316	NegCtrlIntron	IntronCtrl|UBC	2|sgINTRON-UBC_7|IntronCtrl_UBC	IntronCtrl_UBC	ACCGCGGTTTGTCGTCTGTTGCGGGTTTAAGAGCTATGCTGGAAACAGCATAGCAAGTTTAAATAAGGCTAGTCCGTTATCAACTTGAAAAAGTGGCACCGAGTCGGTGCTTTTTT
2|sgINTRON-UBC_8|NegCtrlIntron	GGCAAGAACCCAAGGTCTTG	0	0	0	0	0	0	0	0	0	7316	NegCtrlIntron	IntronCtrl|UBC	2|sgINTRON-UBC_8|IntronCtrl_UBC	IntronCtrl_UBC	ACCGGGCAAGAACCCAAGGTCTTGGTTTAAGAGCTATGCTGGAAACAGCATAGCAAGTTTAAATAAGGCTAGTCCGTTATCAACTTGAAAAAGTGGCACCGAGTCGGTGCTTTTTT
2|sgINTRON-VCP_1|NegCtrlIntron	CGCTCTCTCTTTTTTAAGAG	1	0	0	23	0	0	54209	1	0	7415	NegCtrlIntron	IntronCtrl|VCP	2|sgINTRON-VCP_1|IntronCtrl_VCP	IntronCtrl_VCP	ACCGCGCTCTCTCTTTTTTAAGAGGTTTAAGAGCTATGCTGGAAACAGCATAGCAAGTTTAAATAAGGCTAGTCCGTTATCAACTTGAAAAAGTGGCACCGAGTCGGTGCTTTTTT
2|sgINTRON-VCP_2|NegCtrlIntron	AGAAACTAGTTTAGAGGCAG	0	0	0	0	1	0	0	0	0	7415	NegCtrlIntron	IntronCtrl|VCP	2|sgINTRON-VCP_2|IntronCtrl_VCP	IntronCtrl_VCP	ACCGAGAAACTAGTTTAGAGGCAGGTTTAAGAGCTATGCTGGAAACAGCATAGCAAGTTTAAATAAGGCTAGTCCGTTATCAACTTGAAAAAGTGGCACCGAGTCGGTGCTTTTTT
2|sgINTRON-VCP_3|NegCtrlIntron	AGTGGCAGACTTTTGGAATG	0	0	0	0	0	0	0	0	0	7415	NegCtrlIntron	IntronCtrl|VCP	2|sgINTRON-VCP_3|IntronCtrl_VCP	IntronCtrl_VCP	ACCGAGTGGCAGACTTTTGGAATGGTTTAAGAGCTATGCTGGAAACAGCATAGCAAGTTTAAATAAGGCTAGTCCGTTATCAACTTGAAAAAGTGGCACCGAGTCGGTGCTTTTTT
2|sgINTRON-VCP_4|NegCtrlIntron	GACAGGAGTGGGAGAGCTCG	0	0	0	0	0	0	0	0	0	7415	NegCtrlIntron	IntronCtrl|VCP	2|sgINTRON-VCP_4|IntronCtrl_VCP	IntronCtrl_VCP	ACCGGACAGGAGTGGGAGAGCTCGGTTTAAGAGCTATGCTGGAAACAGCATAGCAAGTTTAAATAAGGCTAGTCCGTTATCAACTTGAAAAAGTGGCACCGAGTCGGTGCTTTTTT
2|sgINTRON-VCP_5|NegCtrlIntron	GTATTTTGATGGGACAGGAG	0	0	0	0	0	0	0	0	0	7415	NegCtrlIntron	IntronCtrl|VCP	2|sgINTRON-VCP_5|IntronCtrl_VCP	IntronCtrl_VCP	ACCGGTATTTTGATGGGACAGGAGGTTTAAGAGCTATGCTGGAAACAGCATAGCAAGTTTAAATAAGGCTAGTCCGTTATCAACTTGAAAAAGTGGCACCGAGTCGGTGCTTTTTT
2|sgINTRON-VCP_6|NegCtrlIntron	CGGGATGGTAGGCAGAATGG	0	0	7234	0	0	0	0	0	1	7415	NegCtrlIntron	IntronCtrl|VCP	2|sgINTRON-VCP_6|IntronCtrl_VCP	IntronCtrl_VCP	ACCGCGGGATGGTAGGCAGAATGGGTTTAAGAGCTATGCTGGAAACAGCATAGCAAGTTTAAATAAGGCTAGTCCGTTATCAACTTGAAAAAGTGGCACCGAGTCGGTGCTTTTTT
2|sgINTRON-VCP_7|NegCtrlIntron	GTAGGTAGATGGGGAATTAG	0	0	0	0	0	0	0	0	0	7415	NegCtrlIntron	IntronCtrl|VCP	2|sgINTRON-VCP_7|IntronCtrl_VCP	IntronCtrl_VCP	ACCGGTAGGTAGATGGGGAATTAGGTTTAAGAGCTATGCTGGAAACAGCATAGCAAGTTTAAATAAGGCTAGTCCGTTATCAACTTGAAAAAGTGGCACCGAGTCGGTGCTTTTTT
2|sgINTRON-VCP_8|NegCtrlIntron	GCAGTTCTGGACACTCTTTG	0	0	0	0	0	0	0	0	0	7415	NegCtrlIntron	IntronCtrl|VCP	2|sgINTRON-VCP_8|IntronCtrl_VCP	IntronCtrl_VCP	ACCGGCAGTTCTGGACACTCTTTGGTTTAAGAGCTATGCTGGAAACAGCATAGCAAGTTTAAATAAGGCTAGTCCGTTATCAACTTGAAAAAGTGGCACCGAGTCGGTGCTTTTTT
3|sgCDC16_CC_1|CDC16_PosCtrl	TCAACACCAGTGCCTGACGG	0	0	0	0	0	0	0	0	0	8881	CDC16_PosCtrl	GenLethal|CDC16	3|sg_hCDC16_CC_1|CDC16_PosCtrl	CDC16_PosCtrl	ACCGTCAACACCAGTGCCTGACGGGTTTAAGAGCTATGCTGGAAACAGCATAGCAAGTTTAAATAAGGCTAGTCCGTTATCAACTTGAAAAAGTGGCACCGAGTCGGTGCTTTTTT
3|sgCDC16_CC_2|CDC16_PosCtrl	AAAGTAGCTTCACTCTCTCG	0	0	0	0	0	0	0	0	0	8881	CDC16_PosCtrl	GenLethal|CDC16	3|sg_hCDC16_CC_2|CDC16_PosCtrl	CDC16_PosCtrl	ACCGAAAGTAGCTTCACTCTCTCGGTTTAAGAGCTATGCTGGAAACAGCATAGCAAGTTTAAATAAGGCTAGTCCGTTATCAACTTGAAAAAGTGGCACCGAGTCGGTGCTTTTTT
3|sgCDC16_CC_3|CDC16_PosCtrl	GAGCCAACCAATAGATGTCC	0	0	0	0	0	0	0	0	0	8881	CDC16_PosCtrl	GenLethal|CDC16	3|sg_hCDC16_CC_3|CDC16_PosCtrl	CDC16_PosCtrl	ACCGGAGCCAACCAATAGATGTCCGTTTAAGAGCTATGCTGGAAACAGCATAGCAAGTTTAAATAAGGCTAGTCCGTTATCAACTTGAAAAAGTGGCACCGAGTCGGTGCTTTTTT
3|sgCDC16_CC_4|CDC16_PosCtrl	GCGCCGCCATGAACCTAGAG	0	0	0	0	0	0	0	0	0	8881	CDC16_PosCtrl	GenLethal|CDC16	3|sg_hCDC16_CC_4|CDC16_PosCtrl	CDC16_PosCtrl	ACCGGCGCCGCCATGAACCTAGAGGTTTAAGAGCTATGCTGGAAACAGCATAGCAAGTTTAAATAAGGCTAGTCCGTTATCAACTTGAAAAAGTGGCACCGAGTCGGTGCTTTTTT
3|sgGTF2B_CC_1|GTF2B_PosCtrl	ACAAAGGTTGGAACAGAACC	0	0	0	0	0	0	0	0	0	2959	GTF2B_PosCtrl	GenLethal|GTF2B	3|sg_hGTF2B_CC_1|GTF2B_PosCtrl	GTF2B_PosCtrl	ACCGACAAAGGTTGGAACAGAACCGTTTAAGAGCTATGCTGGAAACAGCATAGCAAGTTTAAATAAGGCTAGTCCGTTATCAACTTGAAAAAGTGGCACCGAGTCGGTGCTTTTTT
3|sgGTF2B_CC_2|GTF2B_PosCtrl	GGTGACCGGGTTATTGATGT	0	0	0	0	0	0	0	0	0	2959	GTF2B_PosCtrl	GenLethal|GTF2B	3|sg_hGTF2B_CC_2|GTF2B_PosCtrl	GTF2B_PosCtrl	ACCGGGTGACCGGGTTATTGATGTGTTTAAGAGCTATGCTGGAAACAGCATAGCAAGTTTAAATAAGGCTAGTCCGTTATCAACTTGAAAAAGTGGCACCGAGTCGGTGCTTTTTT
3|sgGTF2B_CC_3|GTF2B_PosCtrl	TTAGTGGAGGACTACAGAGC	0	0	0	0	0	0	0	0	0	2959	GTF2B_PosCtrl	GenLethal|GTF2B	3|sg_hGTF2B_CC_3|GTF2B_PosCtrl	GTF2B_PosCtrl	ACCGTTAGTGGAGGACTACAGAGCGTTTAAGAGCTATGCTGGAAACAGCATAGCAAGTTTAAATAAGGCTAGTCCGTTATCAACTTGAAAAAGTGGCACCGAGTCGGTGCTTTTTT
3|sgGTF2B_CC_4|GTF2B_PosCtrl	ACATATAGCCCGTAAAGCTG	0	0	0	0	0	0	0	0	0	2959	GTF2B_PosCtrl	GenLethal|GTF2B	3|sg_hGTF2B_CC_4|GTF2B_PosCtrl	GTF2B_PosCtrl	ACCGACATATAGCCCGTAAAGCTGGTTTAAGAGCTATGCTGGAAACAGCATAGCAAGTTTAAATAAGGCTAGTCCGTTATCAACTTGAAAAAGTGGCACCGAGTCGGTGCTTTTTT
3|sgHSPA5_CC_1|HSPA5_PosCtrl	CGTTGGCGATGATCTCCACG	0	0	0	0	0	0	0	0	0	3309	HSPA5_PosCtrl	GenLethal|HSPA5	3|sg_hHSPA5_CC_1|HSPA5_PosCtrl	HSPA5_PosCtrl	ACCGCGTTGGCGATGATCTCCACGGTTTAAGAGCTATGCTGGAAACAGCATAGCAAGTTTAAATAAGGCTAGTCCGTTATCAACTTGAAAAAGTGGCACCGAGTCGGTGCTTTTTT
3|sgHSPA5_CC_2|HSPA5_PosCtrl	TGGCCTTTTCTACCTCGCGC	0	0	0	0	0	0	0	0	0	3309	HSPA5_PosCtrl	GenLethal|HSPA5	3|sg_hHSPA5_CC_2|HSPA5_PosCtrl	HSPA5_PosCtrl	ACCGTGGCCTTTTCTACCTCGCGCGTTTAAGAGCTATGCTGGAAACAGCATAGCAAGTTTAAATAAGGCTAGTCCGTTATCAACTTGAAAAAGTGGCACCGAGTCGGTGCTTTTTT
3|sgHSPA5_CC_3|HSPA5_PosCtrl	AATGGAGATACTCATCTGGG	0	0	0	0	0	0	0	0	0	3309	HSPA5_PosCtrl	GenLethal|HSPA5	3|sg_hHSPA5_CC_3|HSPA5_PosCtrl	HSPA5_PosCtrl	ACCGAATGGAGATACTCATCTGGGGTTTAAGAGCTATGCTGGAAACAGCATAGCAAGTTTAAATAAGGCTAGTCCGTTATCAACTTGAAAAAGTGGCACCGAGTCGGTGCTTTTTT
3|sgHSPA5_CC_4|HSPA5_PosCtrl	GAAGCCCGTCCAGAAAGTGT	0	0	0	0	0	0	0	0	0	3309	HSPA5_PosCtrl	GenLethal|HSPA5	3|sg_hHSPA5_CC_4|HSPA5_PosCtrl	HSPA5_PosCtrl	ACCGGAAGCCCGTCCAGAAAGTGTGTTTAAGAGCTATGCTGGAAACAGCATAGCAAGTTTAAATAAGGCTAGTCCGTTATCAACTTGAAAAAGTGGCACCGAGTCGGTGCTTTTTT
3|sgHSPA9_CC_1|HSPA9_PosCtrl	CAATCTGAGGAACTCCACGA	0	0	0	0	0	0	0	0	0	3313	HSPA9_PosCtrl	GenLethal|HSPA9	3|sg_hHSPA9_CC_1|HSPA9_PosCtrl	HSPA9_PosCtrl	ACCGCAATCTGAGGAACTCCACGAGTTTAAGAGCTATGCTGGAAACAGCATAGCAAGTTTAAATAAGGCTAGTCCGTTATCAACTTGAAAAAGTGGCACCGAGTCGGTGCTTTTTT
3|sgHSPA9_CC_2|HSPA9_PosCtrl	AGGCTGCGGCGCCCACGAGA	0	2	38281	0	0	0	1	0	0	3313	HSPA9_PosCtrl	GenLethal|HSPA9	3|sg_hHSPA9_CC_2|HSPA9_PosCtrl	HSPA9_PosCtrl	ACCGAGGCTGCGGCGCCCACGAGAGTTTAAGAGCTATGCTGGAAACAGCATAGCAAGTTTAAATAAGGCTAGTCCGTTATCAACTTGAAAAAGTGGCACCGAGTCGGTGCTTTTTT
3|sgHSPA9_CC_3|HSPA9_PosCtrl	ACTTTGACCAGGCCTTGCTA	0	0	0	0	0	0	0	0	0	3313	HSPA9_PosCtrl	GenLethal|HSPA9	3|sg_hHSPA9_CC_3|HSPA9_PosCtrl	HSPA9_PosCtrl	ACCGACTTTGACCAGGCCTTGCTAGTTTAAGAGCTATGCTGGAAACAGCATAGCAAGTTTAAATAAGGCTAGTCCGTTATCAACTTGAAAAAGTGGCACCGAGTCGGTGCTTTTTT
3|sgHSPA9_CC_4|HSPA9_PosCtrl	ACCTTCCATAACTGCCACGC	0	0	7842	1	0	0	0	0	0	3313	HSPA9_PosCtrl	GenLethal|HSPA9	3|sg_hHSPA9_CC_4|HSPA9_PosCtrl	HSPA9_PosCtrl	ACCGACCTTCCATAACTGCCACGCGTTTAAGAGCTATGCTGGAAACAGCATAGCAAGTTTAAATAAGGCTAGTCCGTTATCAACTTGAAAAAGTGGCACCGAGTCGGTGCTTTTTT
3|sgPAFAH1B1_CC_1|PAFAH1B1_PosCtrl	CGAGGCGTACATACCCAAGG	0	0	0	0	0	0	0	0	0	5048	PAFAH1B1_PosCtrl	GenLethal|PAFAH1B1	3|sg_hPAFAH1B1_CC_1|PAFAH1B1_PosCtrl	PAFAH1B1_PosCtrl	ACCGCGAGGCGTACATACCCAAGGGTTTAAGAGCTATGCTGGAAACAGCATAGCAAGTTTAAATAAGGCTAGTCCGTTATCAACTTGAAAAAGTGGCACCGAGTCGGTGCTTTTTT
3|sgPAFAH1B1_CC_2|PAFAH1B1_PosCtrl	ATGGTACGGCCAAATCAAGA	0	0	0	0	0	0	0	0	0	5048	PAFAH1B1_PosCtrl	GenLethal|PAFAH1B1	3|sg_hPAFAH1B1_CC_2|PAFAH1B1_PosCtrl	PAFAH1B1_PosCtrl	ACCGATGGTACGGCCAAATCAAGAGTTTAAGAGCTATGCTGGAAACAGCATAGCAAGTTTAAATAAGGCTAGTCCGTTATCAACTTGAAAAAGTGGCACCGAGTCGGTGCTTTTTT
3|sgPAFAH1B1_CC_3|PAFAH1B1_PosCtrl	TCTTGTAATCCCATACGCGT	0	0	0	0	0	0	0	0	0	5048	PAFAH1B1_PosCtrl	GenLethal|PAFAH1B1	3|sg_hPAFAH1B1_CC_3|PAFAH1B1_PosCtrl	PAFAH1B1_PosCtrl	ACCGTCTTGTAATCCCATACGCGTGTTTAAGAGCTATGCTGGAAACAGCATAGCAAGTTTAAATAAGGCTAGTCCGTTATCAACTTGAAAAAGTGGCACCGAGTCGGTGCTTTTTT
3|sgPAFAH1B1_CC_4|PAFAH1B1_PosCtrl	ATTCACAGGACACAGAGAAT	0	0	0	0	0	0	0	0	0	5048	PAFAH1B1_PosCtrl	GenLethal|PAFAH1B1	3|sg_hPAFAH1B1_CC_4|PAFAH1B1_PosCtrl	PAFAH1B1_PosCtrl	ACCGATTCACAGGACACAGAGAATGTTTAAGAGCTATGCTGGAAACAGCATAGCAAGTTTAAATAAGGCTAGTCCGTTATCAACTTGAAAAAGTGGCACCGAGTCGGTGCTTTTTT
3|sgPCNA_CC_1|PCNA_PosCtrl	CCAGGGCTCCATCCTCAAGA	17	4	0	1	3	1	0	0	54999	5111	PCNA_PosCtrl	GenLethal|PCNA	3|sg_hPCNA_CC_1|PCNA_PosCtrl	PCNA_PosCtrl	ACCGCCAGGGCTCCATCCTCAAGAGTTTAAGAGCTATGCTGGAAACAGCATAGCAAGTTTAAATAAGGCTAGTCCGTTATCAACTTGAAAAAGTGGCACCGAGTCGGTGCTTTTTT
3|sgPCNA_CC_2|PCNA_PosCtrl	TGAGCTGCACCAAAGAGACG	0	0	0	0	0	0	0	0	0	5111	PCNA_PosCtrl	GenLethal|PCNA	3|sg_hPCNA_CC_2|PCNA_PosCtrl	PCNA_PosCtrl	ACCGTGAGCTGCACCAAAGAGACGGTTTAAGAGCTATGCTGGAAACAGCATAGCAAGTTTAAATAAGGCTAGTCCGTTATCAACTTGAAAAAGTGGCACCGAGTCGGTGCTTTTTT
3|sgPCNA_CC_3|PCNA_PosCtrl	ATGTCTGCAGATGTACCCCT	0	0	0	0	0	0	0	0	0	5111	PCNA_PosCtrl	GenLethal|PCNA	3|sg_hPCNA_CC_3|PCNA_PosCtrl	PCNA_PosCtrl	ACCGATGTCTGCAGATGTACCCCTGTTTAAGAGCTATGCTGGAAACAGCATAGCAAGTTTAAATAAGGCTAGTCCGTTATCAACTTGAAAAAGTGGCACCGAGTCGGTGCTTTTTT
3|sgPCNA_CC_4|PCNA_PosCtrl	CGAAGATAACGCGGATACCT	0	0	0	0	0	0	0	0	0	5111	PCNA_PosCtrl	GenLethal|PCNA	3|sg_hPCNA_CC_4|PCNA_PosCtrl	PCNA_PosCtrl	ACCGCGAAGATAACGCGGATACCTGTTTAAGAGCTATGCTGGAAACAGCATAGCAAGTTTAAATAAGGCTAGTCCGTTATCAACTTGAAAAAGTGGCACCGAGTCGGTGCTTTTTT
3|sgPOLR2L_CC_1|POLR2L_PosCtrl	GCTGCAGGCCGAGTACACCG	0	0	0	0	0	0	0	0	0	5441	POLR2L_PosCtrl	GenLethal|POLR2L	3|sg_hPOLR2L_CC_1|POLR2L_PosCtrl	POLR2L_PosCtrl	ACCGGCTGCAGGCCGAGTACACCGGTTTAAGAGCTATGCTGGAAACAGCATAGCAAGTTTAAATAAGGCTAGTCCGTTATCAACTTGAAAAAGTGGCACCGAGTCGGTGCTTTTTT
3|sgPOLR2L_CC_2|POLR2L_PosCtrl	ACAAGTGGGAGGCTTACCTG	0	0	0	0	0	0	0	0	0	5441	POLR2L_PosCtrl	GenLethal|POLR2L	3|sg_hPOLR2L_CC_2|POLR2L_PosCtrl	POLR2L_PosCtrl	ACCGACAAGTGGGAGGCTTACCTGGTTTAAGAGCTATGCTGGAAACAGCATAGCAAGTTTAAATAAGGCTAGTCCGTTATCAACTTGAAAAAGTGGCACCGAGTCGGTGCTTTTTT
3|sgPOLR2L_CC_3|POLR2L_PosCtrl	GCAGCGTACAGGGATGATCA	0	0	0	0	0	0	0	0	0	5441	POLR2L_PosCtrl	GenLethal|POLR2L	3|sg_hPOLR2L_CC_3|POLR2L_PosCtrl	POLR2L_PosCtrl	ACCGGCAGCGTACAGGGATGATCAGTTTAAGAGCTATGCTGGAAACAGCATAGCAAGTTTAAATAAGGCTAGTCCGTTATCAACTTGAAAAAGTGGCACCGAGTCGGTGCTTTTTT
3|sgPOLR2L_CC_4|POLR2L_PosCtrl	GCAGTAGCGCTTCAGGCCCA	0	0	0	0	0	0	0	0	0	5441	POLR2L_PosCtrl	GenLethal|POLR2L	3|sg_hPOLR2L_CC_4|POLR2L_PosCtrl	POLR2L_PosCtrl	ACCGGCAGTAGCGCTTCAGGCCCAGTTTAAGAGCTATGCTGGAAACAGCATAGCAAGTTTAAATAAGGCTAGTCCGTTATCAACTTGAAAAAGTGGCACCGAGTCGGTGCTTTTTT
3|sgRPL9_CC_1|RPL9_PosCtrl	CAAATGGTGGGGTAACAGAA	0	0	0	0	0	0	0	0	0	6133	RPL9_PosCtrl	GenLethal|RPL9	3|sg_hRPL9_CC_1|RPL9_PosCtrl	RPL9_PosCtrl	ACCGCAAATGGTGGGGTAACAGAAGTTTAAGAGCTATGCTGGAAACAGCATAGCAAGTTTAAATAAGGCTAGTCCGTTATCAACTTGAAAAAGTGGCACCGAGTCGGTGCTTTTTT
3|sgRPL9_CC_2|RPL9_PosCtrl	GAAAGGAACTGGCTACCGTT	0	0	0	0	0	0	0	0	0	6133	RPL9_PosCtrl	GenLethal|RPL9	3|sg_hRPL9_CC_2|RPL9_PosCtrl	RPL9_PosCtrl	ACCGGAAAGGAACTGGCTACCGTTGTTTAAGAGCTATGCTGGAAACAGCATAGCAAGTTTAAATAAGGCTAGTCCGTTATCAACTTGAAAAAGTGGCACCGAGTCGGTGCTTTTTT
3|sgRPL9_CC_3|RPL9_PosCtrl	AGGGCTTCCGTTACAAGATG	0	0	0	0	0	0	0	0	0	6133	RPL9_PosCtrl	GenLethal|RPL9	3|sg_hRPL9_CC_3|RPL9_PosCtrl	RPL9_PosCtrl	ACCGAGGGCTTCCGTTACAAGATGGTTTAAGAGCTATGCTGGAAACAGCATAGCAAGTTTAAATAAGGCTAGTCCGTTATCAACTTGAAAAAGTGGCACCGAGTCGGTGCTTTTTT
3|sgRPL9_CC_4|RPL9_PosCtrl	GAACAAGCAACACCTAAAAG	0	0	0	0	0	0	0	0	0	6133	RPL9_PosCtrl	GenLethal|RPL9	3|sg_hRPL9_CC_4|RPL9_PosCtrl	RPL9_PosCtrl	ACCGGAACAAGCAACACCTAAAAGGTTTAAGAGCTATGCTGGAAACAGCATAGCAAGTTTAAATAAGGCTAGTCCGTTATCAACTTGAAAAAGTGGCACCGAGTCGGTGCTTTTTT
3|sgSF3A3_CC_1|SF3A3_PosCtrl	TGAGGAGAAGGAACGGCTCA	0	0	0	0	0	0	0	0	0	10946	SF3A3_PosCtrl	GenLethal|SF3A3	3|sg_hSF3A3_CC_1|SF3A3_PosCtrl	SF3A3_PosCtrl	ACCGTGAGGAGAAGGAACGGCTCAGTTTAAGAGCTATGCTGGAAACAGCATAGCAAGTTTAAATAAGGCTAGTCCGTTATCAACTTGAAAAAGTGGCACCGAGTCGGTGCTTTTTT
3|sgSF3A3_CC_2|SF3A3_PosCtrl	GGAAGAATGCAGAGTATAAG	0	0	0	0	0	0	0	0	0	10946	SF3A3_PosCtrl	GenLethal|SF3A3	3|sg_hSF3A3_CC_2|SF3A3_PosCtrl	SF3A3_PosCtrl	ACCGGGAAGAATGCAGAGTATAAGGTTTAAGAGCTATGCTGGAAACAGCATAGCAAGTTTAAATAAGGCTAGTCCGTTATCAACTTGAAAAAGTGGCACCGAGTCGGTGCTTTTTT
3|sgSF3A3_CC_3|SF3A3_PosCtrl	GGAATTTGAGGAACTCCTGA	0	0	0	0	0	0	0	0	0	10946	SF3A3_PosCtrl	GenLethal|SF3A3	3|sg_hSF3A3_CC_3|SF3A3_PosCtrl	SF3A3_PosCtrl	ACCGGGAATTTGAGGAACTCCTGAGTTTAAGAGCTATGCTGGAAACAGCATAGCAAGTTTAAATAAGGCTAGTCCGTTATCAACTTGAAAAAGTGGCACCGAGTCGGTGCTTTTTT
3|sgSF3A3_CC_4|SF3A3_PosCtrl	GCTCACCGGCCATCCAGGAA	0	0	0	0	0	0	0	0	0	10946	SF3A3_PosCtrl	GenLethal|SF3A3	3|sg_hSF3A3_CC_4|SF3A3_PosCtrl	SF3A3_PosCtrl	ACCGGCTCACCGGCCATCCAGGAAGTTTAAGAGCTATGCTGGAAACAGCATAGCAAGTTTAAATAAGGCTAGTCCGTTATCAACTTGAAAAAGTGGCACCGAGTCGGTGCTTTTTT
3|sgSF3B3_CC_1|SF3B3_PosCtrl	ACTGGCCAGGAACGATGCGA	0	0	0	0	0	0	0	0	1	23450	SF3B3_PosCtrl	GenLethal|SF3B3	3|sg_hSF3B3_CC_1|SF3B3_PosCtrl	SF3B3_PosCtrl	ACCGACTGGCCAGGAACGATGCGAGTTTAAGAGCTATGCTGGAAACAGCATAGCAAGTTTAAATAAGGCTAGTCCGTTATCAACTTGAAAAAGTGGCACCGAGTCGGTGCTTTTTT
3|sgSF3B3_CC_2|SF3B3_PosCtrl	GCAGCTCCAAGATCTTCCCA	0	0	0	0	0	0	0	0	0	23450	SF3B3_PosCtrl	GenLethal|SF3B3	3|sg_hSF3B3_CC_2|SF3B3_PosCtrl	SF3B3_PosCtrl	ACCGGCAGCTCCAAGATCTTCCCAGTTTAAGAGCTATGCTGGAAACAGCATAGCAAGTTTAAATAAGGCTAGTCCGTTATCAACTTGAAAAAGTGGCACCGAGTCGGTGCTTTTTT
3|sgSF3B3_CC_3|SF3B3_PosCtrl	GAATGAGTACACAGAACGGA	0	0	0	0	0	0	0	0	0	23450	SF3B3_PosCtrl	GenLethal|SF3B3	3|sg_hSF3B3_CC_3|SF3B3_PosCtrl	SF3B3_PosCtrl	ACCGGAATGAGTACACAGAACGGAGTTTAAGAGCTATGCTGGAAACAGCATAGCAAGTTTAAATAAGGCTAGTCCGTTATCAACTTGAAAAAGTGGCACCGAGTCGGTGCTTTTTT
3|sgSF3B3_CC_4|SF3B3_PosCtrl	GGAGCAGGACAAGGTCGGGG	0	0	0	0	0	0	0	0	0	23450	SF3B3_PosCtrl	GenLethal|SF3B3	3|sg_hSF3B3_CC_4|SF3B3_PosCtrl	SF3B3_PosCtrl	ACCGGGAGCAGGACAAGGTCGGGGGTTTAAGAGCTATGCTGGAAACAGCATAGCAAGTTTAAATAAGGCTAGTCCGTTATCAACTTGAAAAAGTGGCACCGAGTCGGTGCTTTTTT
4|sgA1BG_1|A1BG	CATCTTCTTTCACCTGAACG	0	0	0	0	0	0	0	0	0	1	A1BG	A1BG	4|sg_hA1BG_01|A1BG	A1BG	ACCGCATCTTCTTTCACCTGAACGGTTTAAGAGCTATGCTGGAAACAGCATAGCAAGTTTAAATAAGGCTAGTCCGTTATCAACTTGAAAAAGTGGCACCGAGTCGGTGCTTTTTT
4|sgA1BG_2|A1BG	CTCCGGGGAGAACTCCGGCG	0	0	0	0	0	0	0	0	0	1	A1BG	A1BG	4|sg_hA1BG_02|A1BG	A1BG	ACCGCTCCGGGGAGAACTCCGGCGGTTTAAGAGCTATGCTGGAAACAGCATAGCAAGTTTAAATAAGGCTAGTCCGTTATCAACTTGAAAAAGTGGCACCGAGTCGGTGCTTTTTT
4|sgA1BG_3|A1BG	TCTCCATGGTGCATCAGCAC	2	0	0	0	0	0	0	0	0	1	A1BG	A1BG	4|sg_hA1BG_03|A1BG	A1BG	ACCGTCTCCATGGTGCATCAGCACGTTTAAGAGCTATGCTGGAAACAGCATAGCAAGTTTAAATAAGGCTAGTCCGTTATCAACTTGAAAAAGTGGCACCGAGTCGGTGCTTTTTT
4|sgA1BG_4|A1BG	TGGAAGTCCACTCCACTCAG	0	0	0	0	0	0	0	0	0	1	A1BG	A1BG	4|sg_hA1BG_04|A1BG	A1BG	ACCGTGGAAGTCCACTCCACTCAGGTTTAAGAGCTATGCTGGAAACAGCATAGCAAGTTTAAATAAGGCTAGTCCGTTATCAACTTGAAAAAGTGGCACCGAGTCGGTGCTTTTTT
4|sgA1CF_1|A1CF	ACAGGAAGAATTCAGTTATG	0	0	0	0	0	0	0	0	0	29974	A1CF	A1CF	4|sg_hA1CF_01|A1CF	A1CF	ACCGACAGGAAGAATTCAGTTATGGTTTAAGAGCTATGCTGGAAACAGCATAGCAAGTTTAAATAAGGCTAGTCCGTTATCAACTTGAAAAAGTGGCACCGAGTCGGTGCTTTTTT
4|sgA1CF_2|A1CF	AGTTATGTTAGGTATACCCG	0	0	0	0	0	0	0	0	0	29974	A1CF	A1CF	4|sg_hA1CF_02|A1CF	A1CF	ACCGAGTTATGTTAGGTATACCCGGTTTAAGAGCTATGCTGGAAACAGCATAGCAAGTTTAAATAAGGCTAGTCCGTTATCAACTTGAAAAAGTGGCACCGAGTCGGTGCTTTTTT
4|sgA1CF_3|A1CF	CTTCATTTCCCAGCCACCAA	0	0	0	0	0	0	0	0	0	29974	A1CF	A1CF	4|sg_hA1CF_03|A1CF	A1CF	ACCGCTTCATTTCCCAGCCACCAAGTTTAAGAGCTATGCTGGAAACAGCATAGCAAGTTTAAATAAGGCTAGTCCGTTATCAACTTGAAAAAGTGGCACCGAGTCGGTGCTTTTTT
4|sgA1CF_4|A1CF	GAATTCAACAATATCAAACC	0	0	0	0	0	0	0	0	0	29974	A1CF	A1CF	4|sg_hA1CF_04|A1CF	A1CF	ACCGGAATTCAACAATATCAAACCGTTTAAGAGCTATGCTGGAAACAGCATAGCAAGTTTAAATAAGGCTAGTCCGTTATCAACTTGAAAAAGTGGCACCGAGTCGGTGCTTTTTT
4|sgA2M_1|A2M	ACTGCATCTGTGCAAACGGG	2	57409	1	1	1	1	0	1	9	2	A2M	A2M	4|sg_hA2M_01|A2M	A2M	ACCGACTGCATCTGTGCAAACGGGGTTTAAGAGCTATGCTGGAAACAGCATAGCAAGTTTAAATAAGGCTAGTCCGTTATCAACTTGAAAAAGTGGCACCGAGTCGGTGCTTTTTT
4|sgA2M_2|A2M	ATGTCTCATGAACTACCCTG	0	0	0	0	0	0	0	0	0	2	A2M	A2M	4|sg_hA2M_02|A2M	A2M	ACCGATGTCTCATGAACTACCCTGGTTTAAGAGCTATGCTGGAAACAGCATAGCAAGTTTAAATAAGGCTAGTCCGTTATCAACTTGAAAAAGTGGCACCGAGTCGGTGCTTTTTT
4|sgA2M_3|A2M	TGAAATGAAACTTCACACTG	0	0	0	0	0	0	0	0	0	2	A2M	A2M	4|sg_hA2M_03|A2M	A2M	ACCGTGAAATGAAACTTCACACTGGTTTAAGAGCTATGCTGGAAACAGCATAGCAAGTTTAAATAAGGCTAGTCCGTTATCAACTTGAAAAAGTGGCACCGAGTCGGTGCTTTTTT
4|sgA2M_4|A2M	TTACTCATATAGGATCCCAA	0	0	0	0	0	0	0	0	0	2	A2M	A2M	4|sg_hA2M_04|A2M	A2M	ACCGTTACTCATATAGGATCCCAAGTTTAAGAGCTATGCTGGAAACAGCATAGCAAGTTTAAATAAGGCTAGTCCGTTATCAACTTGAAAAAGTGGCACCGAGTCGGTGCTTTTTT
4|sgA2ML1_1|A2ML1	AAATACTTACTGGTATCGAG	0	0	0	0	0	1	0	3738	0	144568	A2ML1	A2ML1	4|sg_hA2ML1_01|A2ML1	A2ML1	ACCGAAATACTTACTGGTATCGAGGTTTAAGAGCTATGCTGGAAACAGCATAGCAAGTTTAAATAAGGCTAGTCCGTTATCAACTTGAAAAAGTGGCACCGAGTCGGTGCTTTTTT
4|sgA2ML1_2|A2ML1	ACCCTGGTTACTGATAACAA	0	0	0	0	0	0	0	0	0	144568	A2ML1	A2ML1	4|sg_hA2ML1_02|A2ML1	A2ML1	ACCGACCCTGGTTACTGATAACAAGTTTAAGAGCTATGCTGGAAACAGCATAGCAAGTTTAAATAAGGCTAGTCCGTTATCAACTTGAAAAAGTGGCACCGAGTCGGTGCTTTTTT
4|sgA2ML1_3|A2ML1	GGTGGATTATTACATCGACC	0	0	0	0	0	0	0	0	0	144568	A2ML1	A2ML1	4|sg_hA2ML1_03|A2ML1	A2ML1	ACCGGGTGGATTATTACATCGACCGTTTAAGAGCTATGCTGGAAACAGCATAGCAAGTTTAAATAAGGCTAGTCCGTTATCAACTTGAAAAAGTGGCACCGAGTCGGTGCTTTTTT
4|sgA2ML1_4|A2ML1	TGGTCACTACCCCTATCAAG	1	2	76202	0	0	1	2	0	3	144568	A2ML1	A2ML1	4|sg_hA2ML1_04|A2ML1	A2ML1	ACCGTGGTCACTACCCCTATCAAGGTTTAAGAGCTATGCTGGAAACAGCATAGCAAGTTTAAATAAGGCTAGTCCGTTATCAACTTGAAAAAGTGGCACCGAGTCGGTGCTTTTTT
4|sgA3GALT2_1|A3GALT2	AAATAATGGGAGCCCCCCAG	0	0	0	0	0	0	0	0	0	127550	A3GALT2	A3GALT2	4|sg_hA3GALT2_01|A3GALT2	A3GALT2	ACCGAAATAATGGGAGCCCCCCAGGTTTAAGAGCTATGCTGGAAACAGCATAGCAAGTTTAAATAAGGCTAGTCCGTTATCAACTTGAAAAAGTGGCACCGAGTCGGTGCTTTTTT
4|sgA3GALT2_2|A3GALT2	ACACGTAGTACATCACGCTC	3	1	0	0	86080	3	1	1	0	127550	A3GALT2	A3GALT2	4|sg_hA3GALT2_02|A3GALT2	A3GALT2	ACCGACACGTAGTACATCACGCTCGTTTAAGAGCTATGCTGGAAACAGCATAGCAAGTTTAAATAAGGCTAGTCCGTTATCAACTTGAAAAAGTGGCACCGAGTCGGTGCTTTTTT
4|sgA3GALT2_3|A3GALT2	AGAACATGAAGTGCGCCTCG	0	0	0	0	0	0	0	0	0	127550	A3GALT2	A3GALT2	4|sg_hA3GALT2_03|A3GALT2	A3GALT2	ACCGAGAACATGAAGTGCGCCTCGGTTTAAGAGCTATGCTGGAAACAGCATAGCAAGTTTAAATAAGGCTAGTCCGTTATCAACTTGAAAAAGTGGCACCGAGTCGGTGCTTTTTT
4|sgA3GALT2_4|A3GALT2	GCGCTGGCAAGACGTGTCGA	0	0	0	0	0	0	0	0	0	127550	A3GALT2	A3GALT2	4|sg_hA3GALT2_04|A3GALT2	A3GALT2	ACCGGCGCTGGCAAGACGTGTCGAGTTTAAGAGCTATGCTGGAAACAGCATAGCAAGTTTAAATAAGGCTAGTCCGTTATCAACTTGAAAAAGTGGCACCGAGTCGGTGCTTTTTT
4|sgA4GALT_1|A4GALT	AACGTGCCAGTAGATCATGA	0	0	0	0	0	0	0	0	0	53947	A4GALT	A4GALT	4|sg_hA4GALT_01|A4GALT	A4GALT	ACCGAACGTGCCAGTAGATCATGAGTTTAAGAGCTATGCTGGAAACAGCATAGCAAGTTTAAATAAGGCTAGTCCGTTATCAACTTGAAAAAGTGGCACCGAGTCGGTGCTTTTTT
4|sgA4GALT_2|A4GALT	AGGCCAGGAACGCGCCGTTG	0	0	0	0	0	0	0	0	0	53947	A4GALT	A4GALT	4|sg_hA4GALT_02|A4GALT	A4GALT	ACCGAGGCCAGGAACGCGCCGTTGGTTTAAGAGCTATGCTGGAAACAGCATAGCAAGTTTAAATAAGGCTAGTCCGTTATCAACTTGAAAAAGTGGCACCGAGTCGGTGCTTTTTT
4|sgA4GALT_3|A4GALT	CCACATGAGTGCGATCCTGG	0	0	0	0	0	0	1	21012	0	53947	A4GALT	A4GALT	4|sg_hA4GALT_03|A4GALT	A4GALT	ACCGCCACATGAGTGCGATCCTGGGTTTAAGAGCTATGCTGGAAACAGCATAGCAAGTTTAAATAAGGCTAGTCCGTTATCAACTTGAAAAAGTGGCACCGAGTCGGTGCTTTTTT
4|sgA4GALT_4|A4GALT	GCCGCGTACCAGTCGGCCAG	0	0	0	0	0	0	0	0	1	53947	A4GALT	A4GALT	4|sg_hA4GALT_04|A4GALT	A4GALT	ACCGGCCGCGTACCAGTCGGCCAGGTTTAAGAGCTATGCTGGAAACAGCATAGCAAGTTTAAATAAGGCTAGTCCGTTATCAACTTGAAAAAGTGGCACCGAGTCGGTGCTTTTTT
4|sgA4GNT_1|A4GNT	CAGCCAAAAAGTTCTCCTCA	0	0	0	0	0	0	0	0	0	51146	A4GNT	A4GNT	4|sg_hA4GNT_01|A4GNT	A4GNT	ACCGCAGCCAAAAAGTTCTCCTCAGTTTAAGAGCTATGCTGGAAACAGCATAGCAAGTTTAAATAAGGCTAGTCCGTTATCAACTTGAAAAAGTGGCACCGAGTCGGTGCTTTTTT
4|sgA4GNT_2|A4GNT	CAGCTCGGATGCATCCCGCC	0	0	0	0	0	0	0	0	0	51146	A4GNT	A4GNT	4|sg_hA4GNT_02|A4GNT	A4GNT	ACCGCAGCTCGGATGCATCCCGCCGTTTAAGAGCTATGCTGGAAACAGCATAGCAAGTTTAAATAAGGCTAGTCCGTTATCAACTTGAAAAAGTGGCACCGAGTCGGTGCTTTTTT
4|sgA4GNT_3|A4GNT	TGCATTCCCACAAAAAGGGG	0	0	7411	0	0	0	0	0	0	51146	A4GNT	A4GNT	4|sg_hA4GNT_03|A4GNT	A4GNT	ACCGTGCATTCCCACAAAAAGGGGGTTTAAGAGCTATGCTGGAAACAGCATAGCAAGTTTAAATAAGGCTAGTCCGTTATCAACTTGAAAAAGTGGCACCGAGTCGGTGCTTTTTT
4|sgA4GNT_4|A4GNT	GTAGCGCCTCCACTCTCGAT	0	0	0	0	0	0	0	0	1	51146	A4GNT	A4GNT	4|sg_hA4GNT_04|A4GNT	A4GNT	ACCGGTAGCGCCTCCACTCTCGATGTTTAAGAGCTATGCTGGAAACAGCATAGCAAGTTTAAATAAGGCTAGTCCGTTATCAACTTGAAAAAGTGGCACCGAGTCGGTGCTTTTTT
4|sgAAAS_1|AAAS	CCCAGGGTGAGACAGCACTT	0	0	0	0	0	0	0	26	0	8086	AAAS	AAAS	4|sg_hAAAS_01|AAAS	AAAS	ACCGCCCAGGGTGAGACAGCACTTGTTTAAGAGCTATGCTGGAAACAGCATAGCAAGTTTAAATAAGGCTAGTCCGTTATCAACTTGAAAAAGTGGCACCGAGTCGGTGCTTTTTT
4|sgAAAS_2|AAAS	GCCAAGACAGAGGCACTAAG	0	0	0	0	0	0	0	0	0	8086	AAAS	AAAS	4|sg_hAAAS_02|AAAS	AAAS	ACCGGCCAAGACAGAGGCACTAAGGTTTAAGAGCTATGCTGGAAACAGCATAGCAAGTTTAAATAAGGCTAGTCCGTTATCAACTTGAAAAAGTGGCACCGAGTCGGTGCTTTTTT
4|sgAAAS_3|AAAS	GGCCCATCGACAGAGTGCCA	0	0	0	0	0	0	0	0	0	8086	AAAS	AAAS	4|sg_hAAAS_03|AAAS	AAAS	ACCGGGCCCATCGACAGAGTGCCAGTTTAAGAGCTATGCTGGAAACAGCATAGCAAGTTTAAATAAGGCTAGTCCGTTATCAACTTGAAAAAGTGGCACCGAGTCGGTGCTTTTTT
4|sgAAAS_4|AAAS	TGACAGCGCCCTGATAGAGT	0	0	0	0	0	0	0	0	0	8086	AAAS	AAAS	4|sg_hAAAS_04|AAAS	AAAS	ACCGTGACAGCGCCCTGATAGAGTGTTTAAGAGCTATGCTGGAAACAGCATAGCAAGTTTAAATAAGGCTAGTCCGTTATCAACTTGAAAAAGTGGCACCGAGTCGGTGCTTTTTT
4|sgAACS_1|AACS	AGAGCTACGAGTATGTCTAC	0	0	0	0	0	0	0	0	0	65985	AACS	AACS	4|sg_hAACS_01|AACS	AACS	ACCGAGAGCTACGAGTATGTCTACGTTTAAGAGCTATGCTGGAAACAGCATAGCAAGTTTAAATAAGGCTAGTCCGTTATCAACTTGAAAAAGTGGCACCGAGTCGGTGCTTTTTT
4|sgAACS_2|AACS	CACATTCACACCGAAGTCCG	0	0	0	0	0	0	0	0	0	65985	AACS	AACS	4|sg_hAACS_02|AACS	AACS	ACCGCACATTCACACCGAAGTCCGGTTTAAGAGCTATGCTGGAAACAGCATAGCAAGTTTAAATAAGGCTAGTCCGTTATCAACTTGAAAAAGTGGCACCGAGTCGGTGCTTTTTT
4|sgAACS_3|AACS	CATCCTCCTGTGCTACACCA	0	0	0	0	0	0	0	0	0	65985	AACS	AACS	4|sg_hAACS_03|AACS	AACS	ACCGCATCCTCCTGTGCTACACCAGTTTAAGAGCTATGCTGGAAACAGCATAGCAAGTTTAAATAAGGCTAGTCCGTTATCAACTTGAAAAAGTGGCACCGAGTCGGTGCTTTTTT
4|sgAACS_4|AACS	CTTCTCACGTGTGTATGATG	0	0	0	0	0	0	0	0	0	65985	AACS	AACS	4|sg_hAACS_04|AACS	AACS	ACCGCTTCTCACGTGTGTATGATGGTTTAAGAGCTATGCTGGAAACAGCATAGCAAGTTTAAATAAGGCTAGTCCGTTATCAACTTGAAAAAGTGGCACCGAGTCGGTGCTTTTTT
4|sgAADAC_1|AADAC	AAGTCTGAAGCACTAAGAAG	0	0	0	0	0	0	0	0	0	13	AADAC	AADAC	4|sg_hAADAC_01|AADAC	AADAC	ACCGAAGTCTGAAGCACTAAGAAGGTTTAAGAGCTATGCTGGAAACAGCATAGCAAGTTTAAATAAGGCTAGTCCGTTATCAACTTGAAAAAGTGGCACCGAGTCGGTGCTTTTTT
4|sgAADAC_2|AADAC	ATGTATATAATGCCTTAAGG	0	0	0	0	0	0	0	0	0	13	AADAC	AADAC	4|sg_hAADAC_02|AADAC	AADAC	ACCGATGTATATAATGCCTTAAGGGTTTAAGAGCTATGCTGGAAACAGCATAGCAAGTTTAAATAAGGCTAGTCCGTTATCAACTTGAAAAAGTGGCACCGAGTCGGTGCTTTTTT
4|sgAADAC_3|AADAC	ATTTCTATCCAAATCACTCA	0	0	0	0	0	0	0	0	0	13	AADAC	AADAC	4|sg_hAADAC_03|AADAC	AADAC	ACCGATTTCTATCCAAATCACTCAGTTTAAGAGCTATGCTGGAAACAGCATAGCAAGTTTAAATAAGGCTAGTCCGTTATCAACTTGAAAAAGTGGCACCGAGTCGGTGCTTTTTT
4|sgAADAC_4|AADAC	GGTATTTCTGGAGATAGTGC	0	0	0	0	0	0	0	0	0	13	AADAC	AADAC	4|sg_hAADAC_04|AADAC	AADAC	ACCGGGTATTTCTGGAGATAGTGCGTTTAAGAGCTATGCTGGAAACAGCATAGCAAGTTTAAATAAGGCTAGTCCGTTATCAACTTGAAAAAGTGGCACCGAGTCGGTGCTTTTTT
4|sgAADACL2_1|AADACL2	AAAGAAAGTCAGAAACCCGA	0	0	0	0	0	0	0	0	0	344752	AADACL2	AADACL2	4|sg_hAADACL2_01|AADACL2	AADACL2	ACCGAAAGAAAGTCAGAAACCCGAGTTTAAGAGCTATGCTGGAAACAGCATAGCAAGTTTAAATAAGGCTAGTCCGTTATCAACTTGAAAAAGTGGCACCGAGTCGGTGCTTTTTT
4|sgAADACL2_2|AADACL2	GAAAAAATTTGACTGCAGCA	0	0	0	0	0	0	0	0	0	344752	AADACL2	AADACL2	4|sg_hAADACL2_02|AADACL2	AADACL2	ACCGGAAAAAATTTGACTGCAGCAGTTTAAGAGCTATGCTGGAAACAGCATAGCAAGTTTAAATAAGGCTAGTCCGTTATCAACTTGAAAAAGTGGCACCGAGTCGGTGCTTTTTT
4|sgAADACL2_3|AADACL2	GTGATGTATTCATCTGAAAG	0	0	0	0	0	0	0	0	0	344752	AADACL2	AADACL2	4|sg_hAADACL2_03|AADACL2	AADACL2	ACCGGTGATGTATTCATCTGAAAGGTTTAAGAGCTATGCTGGAAACAGCATAGCAAGTTTAAATAAGGCTAGTCCGTTATCAACTTGAAAAAGTGGCACCGAGTCGGTGCTTTTTT
4|sgAADACL2_4|AADACL2	TGGGGGCAATTTAGCAACAG	0	0	0	0	0	0	0	0	0	344752	AADACL2	AADACL2	4|sg_hAADACL2_04|AADACL2	AADACL2	ACCGTGGGGGCAATTTAGCAACAGGTTTAAGAGCTATGCTGGAAACAGCATAGCAAGTTTAAATAAGGCTAGTCCGTTATCAACTTGAAAAAGTGGCACCGAGTCGGTGCTTTTTT
4|sgAADACL3_1|AADACL3	ACTTATGCTTAGGTAACTTG	0	0	0	0	0	0	0	0	0	126767	AADACL3	AADACL3	4|sg_hAADACL3_01|AADACL3	AADACL3	ACCGACTTATGCTTAGGTAACTTGGTTTAAGAGCTATGCTGGAAACAGCATAGCAAGTTTAAATAAGGCTAGTCCGTTATCAACTTGAAAAAGTGGCACCGAGTCGGTGCTTTTTT
4|sgAADACL3_2|AADACL3	CTGCGGTGACAGTTTCGGAG	0	0	0	0	0	0	0	0	0	126767	AADACL3	AADACL3	4|sg_hAADACL3_02|AADACL3	AADACL3	ACCGCTGCGGTGACAGTTTCGGAGGTTTAAGAGCTATGCTGGAAACAGCATAGCAAGTTTAAATAAGGCTAGTCCGTTATCAACTTGAAAAAGTGGCACCGAGTCGGTGCTTTTTT
4|sgAADACL3_3|AADACL3	GGCATCGTGTACTACCACGG	0	0	0	0	0	0	0	0	0	126767	AADACL3	AADACL3	4|sg_hAADACL3_03|AADACL3	AADACL3	ACCGGGCATCGTGTACTACCACGGGTTTAAGAGCTATGCTGGAAACAGCATAGCAAGTTTAAATAAGGCTAGTCCGTTATCAACTTGAAAAAGTGGCACCGAGTCGGTGCTTTTTT
4|sgAADACL3_4|AADACL3	TCGGGGTCATACTTTAGCGG	1	0	2	0	0	1	0	26195	0	126767	AADACL3	AADACL3	4|sg_hAADACL3_04|AADACL3	AADACL3	ACCGTCGGGGTCATACTTTAGCGGGTTTAAGAGCTATGCTGGAAACAGCATAGCAAGTTTAAATAAGGCTAGTCCGTTATCAACTTGAAAAAGTGGCACCGAGTCGGTGCTTTTTT
4|sgAADACL4_1|AADACL4	CAAGGTAGCAGGGATATCCG	0	1	0	0	0	0	0	0	0	343066	AADACL4	AADACL4	4|sg_hAADACL4_01|AADACL4	AADACL4	ACCGCAAGGTAGCAGGGATATCCGGTTTAAGAGCTATGCTGGAAACAGCATAGCAAGTTTAAATAAGGCTAGTCCGTTATCAACTTGAAAAAGTGGCACCGAGTCGGTGCTTTTTT
4|sgAADACL4_2|AADACL4	GTAAACTCACCAAAGTGACC	0	0	0	0	0	0	0	0	0	343066	AADACL4	AADACL4	4|sg_hAADACL4_02|AADACL4	AADACL4	ACCGGTAAACTCACCAAAGTGACCGTTTAAGAGCTATGCTGGAAACAGCATAGCAAGTTTAAATAAGGCTAGTCCGTTATCAACTTGAAAAAGTGGCACCGAGTCGGTGCTTTTTT
4|sgAADACL4_3|AADACL4	TAGAAGATGATGCCTCGCCG	0	0	8349	1	0	0	0	0	1	343066	AADACL4	AADACL4	4|sg_hAADACL4_03|AADACL4	AADACL4	ACCGTAGAAGATGATGCCTCGCCGGTTTAAGAGCTATGCTGGAAACAGCATAGCAAGTTTAAATAAGGCTAGTCCGTTATCAACTTGAAAAAGTGGCACCGAGTCGGTGCTTTTTT
4|sgAADACL4_4|AADACL4	TATCGTCCCAAAACGCAGGT	0	0	0	0	0	0	0	0	0	343066	AADACL4	AADACL4	4|sg_hAADACL4_04|AADACL4	AADACL4	ACCGTATCGTCCCAAAACGCAGGTGTTTAAGAGCTATGCTGGAAACAGCATAGCAAGTTTAAATAAGGCTAGTCCGTTATCAACTTGAAAAAGTGGCACCGAGTCGGTGCTTTTTT
4|sgAADAT_1|AADAT	AGATCCATTTGTCCTTGACT	0	0	0	0	0	0	0	0	0	51166	AADAT	AADAT	4|sg_hAADAT_01|AADAT	AADAT	ACCGAGATCCATTTGTCCTTGACTGTTTAAGAGCTATGCTGGAAACAGCATAGCAAGTTTAAATAAGGCTAGTCCGTTATCAACTTGAAAAAGTGGCACCGAGTCGGTGCTTTTTT
4|sgAADAT_2|AADAT	ATTGATACTTACCCAGCACT	0	0	0	0	0	0	0	0	0	51166	AADAT	AADAT	4|sg_hAADAT_02|AADAT	AADAT	ACCGATTGATACTTACCCAGCACTGTTTAAGAGCTATGCTGGAAACAGCATAGCAAGTTTAAATAAGGCTAGTCCGTTATCAACTTGAAAAAGTGGCACCGAGTCGGTGCTTTTTT
4|sgAADAT_3|AADAT	GTAGCTGACATATTGAGCAG	0	0	0	0	0	0	0	0	0	51166	AADAT	AADAT	4|sg_hAADAT_03|AADAT	AADAT	ACCGGTAGCTGACATATTGAGCAGGTTTAAGAGCTATGCTGGAAACAGCATAGCAAGTTTAAATAAGGCTAGTCCGTTATCAACTTGAAAAAGTGGCACCGAGTCGGTGCTTTTTT
4|sgAADAT_4|AADAT	TAATAATGTTGCAGCCCAGT	0	1	0	0	0	0	0	0	0	51166	AADAT	AADAT	4|sg_hAADAT_04|AADAT	AADAT	ACCGTAATAATGTTGCAGCCCAGTGTTTAAGAGCTATGCTGGAAACAGCATAGCAAGTTTAAATAAGGCTAGTCCGTTATCAACTTGAAAAAGTGGCACCGAGTCGGTGCTTTTTT
4|sgAAED1_1|AAED1	CATCTGCAAGGAATACGTAG	0	0	0	0	0	0	0	0	0	195827	AAED1	AAED1	4|sg_hPRXL2C_01|PRXL2C	PRXL2C	ACCGCATCTGCAAGGAATACGTAGGTTTAAGAGCTATGCTGGAAACAGCATAGCAAGTTTAAATAAGGCTAGTCCGTTATCAACTTGAAAAAGTGGCACCGAGTCGGTGCTTTTTT
4|sgAAED1_2|AAED1	GACATGTTATGTCTTACCTG	0	0	0	0	0	0	0	0	0	195827	AAED1	AAED1	4|sg_hPRXL2C_02|PRXL2C	PRXL2C	ACCGGACATGTTATGTCTTACCTGGTTTAAGAGCTATGCTGGAAACAGCATAGCAAGTTTAAATAAGGCTAGTCCGTTATCAACTTGAAAAAGTGGCACCGAGTCGGTGCTTTTTT
4|sgAAED1_3|AAED1	GTCATCCTACCATCATATTG	0	0	0	0	0	0	0	0	0	195827	AAED1	AAED1	4|sg_hPRXL2C_03|PRXL2C	PRXL2C	ACCGGTCATCCTACCATCATATTGGTTTAAGAGCTATGCTGGAAACAGCATAGCAAGTTTAAATAAGGCTAGTCCGTTATCAACTTGAAAAAGTGGCACCGAGTCGGTGCTTTTTT
4|sgAAED1_4|AAED1	TCCCGGAACAGCGCGCCGAA	0	0	0	0	0	0	0	0	0	195827	AAED1	AAED1	4|sg_hPRXL2C_04|PRXL2C	PRXL2C	ACCGTCCCGGAACAGCGCGCCGAAGTTTAAGAGCTATGCTGGAAACAGCATAGCAAGTTTAAATAAGGCTAGTCCGTTATCAACTTGAAAAAGTGGCACCGAGTCGGTGCTTTTTT
4|sgAAGAB_1|AAGAB	AGCAGACATCAATCTATGTG	0	0	0	0	0	0	0	0	0	79719	AAGAB	AAGAB	4|sg_hAAGAB_01|AAGAB	AAGAB	ACCGAGCAGACATCAATCTATGTGGTTTAAGAGCTATGCTGGAAACAGCATAGCAAGTTTAAATAAGGCTAGTCCGTTATCAACTTGAAAAAGTGGCACCGAGTCGGTGCTTTTTT
4|sgAAGAB_2|AAGAB	CAAGAATGGTGCATCAAACA	0	0	0	0	0	0	0	0	0	79719	AAGAB	AAGAB	4|sg_hAAGAB_02|AAGAB	AAGAB	ACCGCAAGAATGGTGCATCAAACAGTTTAAGAGCTATGCTGGAAACAGCATAGCAAGTTTAAATAAGGCTAGTCCGTTATCAACTTGAAAAAGTGGCACCGAGTCGGTGCTTTTTT
4|sgAAGAB_3|AAGAB	CACTACATTGGACCACACAT	0	0	0	0	0	0	0	0	0	79719	AAGAB	AAGAB	4|sg_hAAGAB_03|AAGAB	AAGAB	ACCGCACTACATTGGACCACACATGTTTAAGAGCTATGCTGGAAACAGCATAGCAAGTTTAAATAAGGCTAGTCCGTTATCAACTTGAAAAAGTGGCACCGAGTCGGTGCTTTTTT
4|sgAAGAB_4|AAGAB	GCCATGAGGAGACACTATCA	0	0	0	0	0	0	0	0	0	79719	AAGAB	AAGAB	4|sg_hAAGAB_04|AAGAB	AAGAB	ACCGGCCATGAGGAGACACTATCAGTTTAAGAGCTATGCTGGAAACAGCATAGCAAGTTTAAATAAGGCTAGTCCGTTATCAACTTGAAAAAGTGGCACCGAGTCGGTGCTTTTTT
4|sgAAK1_1|AAK1	CAAAACTCCTATTATCCACC	0	0	1	0	0	0	0	0	1	22848	AAK1	AAK1	4|sg_hAAK1_01|AAK1	AAK1	ACCGCAAAACTCCTATTATCCACCGTTTAAGAGCTATGCTGGAAACAGCATAGCAAGTTTAAATAAGGCTAGTCCGTTATCAACTTGAAAAAGTGGCACCGAGTCGGTGCTTTTTT
4|sgAAK1_2|AAK1	CAAAAGGCCGGATATTTACC	0	0	0	0	0	0	0	0	0	22848	AAK1	AAK1	4|sg_hAAK1_02|AAK1	AAK1	ACCGCAAAAGGCCGGATATTTACCGTTTAAGAGCTATGCTGGAAACAGCATAGCAAGTTTAAATAAGGCTAGTCCGTTATCAACTTGAAAAAGTGGCACCGAGTCGGTGCTTTTTT
4|sgAAK1_3|AAK1	GGGTGCAATTGAAGTCTCTG	0	0	0	0	0	0	0	0	0	22848	AAK1	AAK1	4|sg_hAAK1_03|AAK1	AAK1	ACCGGGGTGCAATTGAAGTCTCTGGTTTAAGAGCTATGCTGGAAACAGCATAGCAAGTTTAAATAAGGCTAGTCCGTTATCAACTTGAAAAAGTGGCACCGAGTCGGTGCTTTTTT
4|sgAAK1_4|AAK1	TGGCAAAATCATCACTACGA	0	0	0	0	0	0	0	0	0	22848	AAK1	AAK1	4|sg_hAAK1_04|AAK1	AAK1	ACCGTGGCAAAATCATCACTACGAGTTTAAGAGCTATGCTGGAAACAGCATAGCAAGTTTAAATAAGGCTAGTCCGTTATCAACTTGAAAAAGTGGCACCGAGTCGGTGCTTTTTT
4|sgAAMDC_1|AAMDC	AAATTGCTTCCTTATCATGG	0	0	0	0	0	0	0	0	0	28971	AAMDC	AAMDC	4|sg_hAAMDC_01|AAMDC	AAMDC	ACCGAAATTGCTTCCTTATCATGGGTTTAAGAGCTATGCTGGAAACAGCATAGCAAGTTTAAATAAGGCTAGTCCGTTATCAACTTGAAAAAGTGGCACCGAGTCGGTGCTTTTTT
4|sgAAMDC_2|AAMDC	AAGTATGGCCAGGGGGTAGT	0	0	0	0	0	0	0	0	1	28971	AAMDC	AAMDC	4|sg_hAAMDC_02|AAMDC	AAMDC	ACCGAAGTATGGCCAGGGGGTAGTGTTTAAGAGCTATGCTGGAAACAGCATAGCAAGTTTAAATAAGGCTAGTCCGTTATCAACTTGAAAAAGTGGCACCGAGTCGGTGCTTTTTT
4|sgAAMDC_3|AAMDC	AGGTACTCCACAGTTGATGA	0	0	0	0	0	0	0	0	0	28971	AAMDC	AAMDC	4|sg_hAAMDC_03|AAMDC	AAMDC	ACCGAGGTACTCCACAGTTGATGAGTTTAAGAGCTATGCTGGAAACAGCATAGCAAGTTTAAATAAGGCTAGTCCGTTATCAACTTGAAAAAGTGGCACCGAGTCGGTGCTTTTTT
4|sgAAMDC_4|AAMDC	GATTGGCCGAGGGATGAGTG	0	0	0	0	0	0	0	0	1	28971	AAMDC	AAMDC	4|sg_hAAMDC_04|AAMDC	AAMDC	ACCGGATTGGCCGAGGGATGAGTGGTTTAAGAGCTATGCTGGAAACAGCATAGCAAGTTTAAATAAGGCTAGTCCGTTATCAACTTGAAAAAGTGGCACCGAGTCGGTGCTTTTTT
4|sgAAMP_1|AAMP	AAGATGACAAAGCCTTCGTA	0	0	0	0	0	0	0	0	0	14	AAMP	AAMP	4|sg_hAAMP_01|AAMP	AAMP	ACCGAAGATGACAAAGCCTTCGTAGTTTAAGAGCTATGCTGGAAACAGCATAGCAAGTTTAAATAAGGCTAGTCCGTTATCAACTTGAAAAAGTGGCACCGAGTCGGTGCTTTTTT
4|sgAAMP_2|AAMP	AGGTGACCTCGCTATCGTCG	0	0	0	0	0	0	0	0	0	14	AAMP	AAMP	4|sg_hAAMP_02|AAMP	AAMP	ACCGAGGTGACCTCGCTATCGTCGGTTTAAGAGCTATGCTGGAAACAGCATAGCAAGTTTAAATAAGGCTAGTCCGTTATCAACTTGAAAAAGTGGCACCGAGTCGGTGCTTTTTT
4|sgAAMP_3|AAMP	TGAGTGGCCTCTTGAAAGTG	2	1	0	0	0	1	0	17029	0	14	AAMP	AAMP	4|sg_hAAMP_03|AAMP	AAMP	ACCGTGAGTGGCCTCTTGAAAGTGGTTTAAGAGCTATGCTGGAAACAGCATAGCAAGTTTAAATAAGGCTAGTCCGTTATCAACTTGAAAAAGTGGCACCGAGTCGGTGCTTTTTT
4|sgAAMP_4|AAMP	TGGATGTGGAAAGTCCCGAA	0	0	0	0	0	0	0	0	0	14	AAMP	AAMP	4|sg_hAAMP_04|AAMP	AAMP	ACCGTGGATGTGGAAAGTCCCGAAGTTTAAGAGCTATGCTGGAAACAGCATAGCAAGTTTAAATAAGGCTAGTCCGTTATCAACTTGAAAAAGTGGCACCGAGTCGGTGCTTTTTT
4|sgAANAT_1|AANAT	ACCTTCACGCTCGATCTCAA	0	27240	0	0	1	2	0	0	6	15	AANAT	AANAT	4|sg_hAANAT_01|AANAT	AANAT	ACCGACCTTCACGCTCGATCTCAAGTTTAAGAGCTATGCTGGAAACAGCATAGCAAGTTTAAATAAGGCTAGTCCGTTATCAACTTGAAAAAGTGGCACCGAGTCGGTGCTTTTTT
4|sgAANAT_2|AANAT	GCCCTCCTCGAACCAGCCCA	0	0	0	0	0	0	0	0	0	15	AANAT	AANAT	4|sg_hAANAT_02|AANAT	AANAT	ACCGGCCCTCCTCGAACCAGCCCAGTTTAAGAGCTATGCTGGAAACAGCATAGCAAGTTTAAATAAGGCTAGTCCGTTATCAACTTGAAAAAGTGGCACCGAGTCGGTGCTTTTTT
4|sgAANAT_3|AANAT	GGTGAGGCAGCGAAACTCAC	0	0	0	0	0	0	0	0	0	15	AANAT	AANAT	4|sg_hAANAT_03|AANAT	AANAT	ACCGGGTGAGGCAGCGAAACTCACGTTTAAGAGCTATGCTGGAAACAGCATAGCAAGTTTAAATAAGGCTAGTCCGTTATCAACTTGAAAAAGTGGCACCGAGTCGGTGCTTTTTT
4|sgAANAT_4|AANAT	GTGGCGCCGCTGACAGCTCG	0	0	0	0	0	0	0	0	0	15	AANAT	AANAT	4|sg_hAANAT_04|AANAT	AANAT	ACCGGTGGCGCCGCTGACAGCTCGGTTTAAGAGCTATGCTGGAAACAGCATAGCAAGTTTAAATAAGGCTAGTCCGTTATCAACTTGAAAAAGTGGCACCGAGTCGGTGCTTTTTT
4|sgAAR2_1|AAR2	CATGTTCAGGATGACCACAG	2	0	2	0	0	0	0	22469	0	25980	AAR2	AAR2	4|sg_hAAR2_01|AAR2	AAR2	ACCGCATGTTCAGGATGACCACAGGTTTAAGAGCTATGCTGGAAACAGCATAGCAAGTTTAAATAAGGCTAGTCCGTTATCAACTTGAAAAAGTGGCACCGAGTCGGTGCTTTTTT
4|sgAAR2_2|AAR2	CTTGGTTATCTCAGCTGGCG	0	1	0	0	0	0	0	0	0	25980	AAR2	AAR2	4|sg_hAAR2_02|AAR2	AAR2	ACCGCTTGGTTATCTCAGCTGGCGGTTTAAGAGCTATGCTGGAAACAGCATAGCAAGTTTAAATAAGGCTAGTCCGTTATCAACTTGAAAAAGTGGCACCGAGTCGGTGCTTTTTT
4|sgAAR2_3|AAR2	GGGGTAGATTCTGCCCCACG	0	0	0	0	0	0	0	0	0	25980	AAR2	AAR2	4|sg_hAAR2_03|AAR2	AAR2	ACCGGGGGTAGATTCTGCCCCACGGTTTAAGAGCTATGCTGGAAACAGCATAGCAAGTTTAAATAAGGCTAGTCCGTTATCAACTTGAAAAAGTGGCACCGAGTCGGTGCTTTTTT
4|sgAAR2_4|AAR2	TAAGGAAGAAACCCATACGA	0	0	1	0	0	0	0	0	0	25980	AAR2	AAR2	4|sg_hAAR2_04|AAR2	AAR2	ACCGTAAGGAAGAAACCCATACGAGTTTAAGAGCTATGCTGGAAACAGCATAGCAAGTTTAAATAAGGCTAGTCCGTTATCAACTTGAAAAAGTGGCACCGAGTCGGTGCTTTTTT
4|sgAARD_1|AARD	GCAGAGCTGGACGGGCGTTG	0	16171	0	0	0	3	0	0	2	441376	AARD	AARD	4|sg_hAARD_01|AARD	AARD	ACCGGCAGAGCTGGACGGGCGTTGGTTTAAGAGCTATGCTGGAAACAGCATAGCAAGTTTAAATAAGGCTAGTCCGTTATCAACTTGAAAAAGTGGCACCGAGTCGGTGCTTTTTT
4|sgAARD_2|AARD	GGGAAATTCTCTCTCTGCAG	0	0	0	0	0	0	0	0	0	441376	AARD	AARD	4|sg_hAARD_02|AARD	AARD	ACCGGGGAAATTCTCTCTCTGCAGGTTTAAGAGCTATGCTGGAAACAGCATAGCAAGTTTAAATAAGGCTAGTCCGTTATCAACTTGAAAAAGTGGCACCGAGTCGGTGCTTTTTT
4|sgAARD_3|AARD	GTCCCCGAAGAAGTCGCACG	0	0	0	0	0	0	0	0	0	441376	AARD	AARD	4|sg_hAARD_03|AARD	AARD	ACCGGTCCCCGAAGAAGTCGCACGGTTTAAGAGCTATGCTGGAAACAGCATAGCAAGTTTAAATAAGGCTAGTCCGTTATCAACTTGAAAAAGTGGCACCGAGTCGGTGCTTTTTT
4|sgAARD_4|AARD	TGCTGGAGGACCTCAGACGA	0	0	0	0	0	0	0	0	0	441376	AARD	AARD	4|sg_hAARD_04|AARD	AARD	ACCGTGCTGGAGGACCTCAGACGAGTTTAAGAGCTATGCTGGAAACAGCATAGCAAGTTTAAATAAGGCTAGTCCGTTATCAACTTGAAAAAGTGGCACCGAGTCGGTGCTTTTTT
4|sgAARS_1|AARS	CCAAGAAAAGCATTGACACA	0	0	0	0	0	0	0	0	0	16	AARS	AARS	4|sg_hAARS1_01|AARS1	AARS1	ACCGCCAAGAAAAGCATTGACACAGTTTAAGAGCTATGCTGGAAACAGCATAGCAAGTTTAAATAAGGCTAGTCCGTTATCAACTTGAAAAAGTGGCACCGAGTCGGTGCTTTTTT
4|sgAARS_2|AARS	GGAGGCCAGATCTATGACGA	0	0	0	0	0	0	0	0	0	16	AARS	AARS	4|sg_hAARS1_02|AARS1	AARS1	ACCGGGAGGCCAGATCTATGACGAGTTTAAGAGCTATGCTGGAAACAGCATAGCAAGTTTAAATAAGGCTAGTCCGTTATCAACTTGAAAAAGTGGCACCGAGTCGGTGCTTTTTT
4|sgAARS_3|AARS	TCAGAATGTGCGTAGCTGTG	0	0	0	0	0	0	0	0	0	16	AARS	AARS	4|sg_hAARS1_03|AARS1	AARS1	ACCGTCAGAATGTGCGTAGCTGTGGTTTAAGAGCTATGCTGGAAACAGCATAGCAAGTTTAAATAAGGCTAGTCCGTTATCAACTTGAAAAAGTGGCACCGAGTCGGTGCTTTTTT
4|sgAARS_4|AARS	TTGGTGCTGAGGATGCCGAT	0	0	0	0	0	0	0	0	0	16	AARS	AARS	4|sg_hAARS1_04|AARS1	AARS1	ACCGTTGGTGCTGAGGATGCCGATGTTTAAGAGCTATGCTGGAAACAGCATAGCAAGTTTAAATAAGGCTAGTCCGTTATCAACTTGAAAAAGTGGCACCGAGTCGGTGCTTTTTT
4|sgAARS2_1|AARS2	AGCAAACTGGGGTCGCCGCG	0	0	0	0	23346	0	0	0	0	57505	AARS2	AARS2	4|sg_hAARS2_01|AARS2	AARS2	ACCGAGCAAACTGGGGTCGCCGCGGTTTAAGAGCTATGCTGGAAACAGCATAGCAAGTTTAAATAAGGCTAGTCCGTTATCAACTTGAAAAAGTGGCACCGAGTCGGTGCTTTTTT
4|sgAARS2_2|AARS2	CCAACTTCTACGCAGAACAG	0	0	0	0	0	0	0	0	0	57505	AARS2	AARS2	4|sg_hAARS2_02|AARS2	AARS2	ACCGCCAACTTCTACGCAGAACAGGTTTAAGAGCTATGCTGGAAACAGCATAGCAAGTTTAAATAAGGCTAGTCCGTTATCAACTTGAAAAAGTGGCACCGAGTCGGTGCTTTTTT
4|sgAARS2_3|AARS2	GCTGAGCCAGTTCAGAAGCA	0	0	0	0	0	0	0	0	0	57505	AARS2	AARS2	4|sg_hAARS2_03|AARS2	AARS2	ACCGGCTGAGCCAGTTCAGAAGCAGTTTAAGAGCTATGCTGGAAACAGCATAGCAAGTTTAAATAAGGCTAGTCCGTTATCAACTTGAAAAAGTGGCACCGAGTCGGTGCTTTTTT
4|sgAARS2_4|AARS2	TCGTAGTGGATCTCAGTACA	0	0	0	0	0	0	0	0	0	57505	AARS2	AARS2	4|sg_hAARS2_04|AARS2	AARS2	ACCGTCGTAGTGGATCTCAGTACAGTTTAAGAGCTATGCTGGAAACAGCATAGCAAGTTTAAATAAGGCTAGTCCGTTATCAACTTGAAAAAGTGGCACCGAGTCGGTGCTTTTTT
4|sgAARSD1_1|AARSD1	ACCTCCGCTCCCAATCTACC	0	0	0	0	0	0	0	0	0	80755	AARSD1	AARSD1	4|sg_hAARSD1_01|AARSD1	AARSD1	ACCGACCTCCGCTCCCAATCTACCGTTTAAGAGCTATGCTGGAAACAGCATAGCAAGTTTAAATAAGGCTAGTCCGTTATCAACTTGAAAAAGTGGCACCGAGTCGGTGCTTTTTT
4|sgAARSD1_2|AARSD1	CATTCGGGTTGTTAACATCG	0	0	0	0	0	0	0	0	0	80755	AARSD1	AARSD1	4|sg_hAARSD1_02|AARSD1	AARSD1	ACCGCATTCGGGTTGTTAACATCGGTTTAAGAGCTATGCTGGAAACAGCATAGCAAGTTTAAATAAGGCTAGTCCGTTATCAACTTGAAAAAGTGGCACCGAGTCGGTGCTTTTTT
4|sgAARSD1_3|AARSD1	CCCAGACAGAAATATCAGGT	14	6	3	1	0	0	2	1	89277	80755	AARSD1	AARSD1	4|sg_hAARSD1_03|AARSD1	AARSD1	ACCGCCCAGACAGAAATATCAGGTGTTTAAGAGCTATGCTGGAAACAGCATAGCAAGTTTAAATAAGGCTAGTCCGTTATCAACTTGAAAAAGTGGCACCGAGTCGGTGCTTTTTT
4|sgAARSD1_4|AARSD1	GTGCTGAGAGTGACTCGCCG	0	0	0	0	0	0	0	0	0	80755	AARSD1	AARSD1	4|sg_hAARSD1_04|AARSD1	AARSD1	ACCGGTGCTGAGAGTGACTCGCCGGTTTAAGAGCTATGCTGGAAACAGCATAGCAAGTTTAAATAAGGCTAGTCCGTTATCAACTTGAAAAAGTGGCACCGAGTCGGTGCTTTTTT
4|sgAASDH_1|AASDH	AAATGAGTTGATAATGACGG	0	0	0	0	0	0	0	0	0	132949	AASDH	AASDH	4|sg_hAASDH_01|AASDH	AASDH	ACCGAAATGAGTTGATAATGACGGGTTTAAGAGCTATGCTGGAAACAGCATAGCAAGTTTAAATAAGGCTAGTCCGTTATCAACTTGAAAAAGTGGCACCGAGTCGGTGCTTTTTT
4|sgAASDH_2|AASDH	GACAGTCAGATCAAACGTCA	0	0	0	0	0	0	0	0	0	132949	AASDH	AASDH	4|sg_hAASDH_02|AASDH	AASDH	ACCGGACAGTCAGATCAAACGTCAGTTTAAGAGCTATGCTGGAAACAGCATAGCAAGTTTAAATAAGGCTAGTCCGTTATCAACTTGAAAAAGTGGCACCGAGTCGGTGCTTTTTT
4|sgAASDH_3|AASDH	TGTGAATTGCCTGTACAACT	0	0	0	0	0	0	0	0	0	132949	AASDH	AASDH	4|sg_hAASDH_03|AASDH	AASDH	ACCGTGTGAATTGCCTGTACAACTGTTTAAGAGCTATGCTGGAAACAGCATAGCAAGTTTAAATAAGGCTAGTCCGTTATCAACTTGAAAAAGTGGCACCGAGTCGGTGCTTTTTT
4|sgAASDH_4|AASDH	TTGTTGGTACATCAGTACCT	0	0	0	0	0	0	0	0	0	132949	AASDH	AASDH	4|sg_hAASDH_04|AASDH	AASDH	ACCGTTGTTGGTACATCAGTACCTGTTTAAGAGCTATGCTGGAAACAGCATAGCAAGTTTAAATAAGGCTAGTCCGTTATCAACTTGAAAAAGTGGCACCGAGTCGGTGCTTTTTT
4|sgAASDHPPT_1|AASDHPPT	AGGAAAACCAGTTCTTGCAA	0	0	0	0	0	0	0	0	0	60496	AASDHPPT	AASDHPPT	4|sg_hAASDHPPT_01|AASDHPPT	AASDHPPT	ACCGAGGAAAACCAGTTCTTGCAAGTTTAAGAGCTATGCTGGAAACAGCATAGCAAGTTTAAATAAGGCTAGTCCGTTATCAACTTGAAAAAGTGGCACCGAGTCGGTGCTTTTTT
4|sgAASDHPPT_2|AASDHPPT	CCCGAGGAGAAGGAGCGCAT	0	0	0	0	0	0	0	0	0	60496	AASDHPPT	AASDHPPT	4|sg_hAASDHPPT_02|AASDHPPT	AASDHPPT	ACCGCCCGAGGAGAAGGAGCGCATGTTTAAGAGCTATGCTGGAAACAGCATAGCAAGTTTAAATAAGGCTAGTCCGTTATCAACTTGAAAAAGTGGCACCGAGTCGGTGCTTTTTT
4|sgAASDHPPT_3|AASDHPPT	CTGCCAGCAGCCATTCGGCT	0	0	0	0	0	0	0	0	0	60496	AASDHPPT	AASDHPPT	4|sg_hAASDHPPT_03|AASDHPPT	AASDHPPT	ACCGCTGCCAGCAGCCATTCGGCTGTTTAAGAGCTATGCTGGAAACAGCATAGCAAGTTTAAATAAGGCTAGTCCGTTATCAACTTGAAAAAGTGGCACCGAGTCGGTGCTTTTTT
4|sgAASDHPPT_4|AASDHPPT	GCTGAACCTGAGCTGCAAGT	0	0	0	0	0	0	0	0	0	60496	AASDHPPT	AASDHPPT	4|sg_hAASDHPPT_04|AASDHPPT	AASDHPPT	ACCGGCTGAACCTGAGCTGCAAGTGTTTAAGAGCTATGCTGGAAACAGCATAGCAAGTTTAAATAAGGCTAGTCCGTTATCAACTTGAAAAAGTGGCACCGAGTCGGTGCTTTTTT
4|sgAASS_1|AASS	AAGACCTCAGAAAAGTGTAT	0	0	0	0	0	0	0	0	0	10157	AASS	AASS	4|sg_hAASS_01|AASS	AASS	ACCGAAGACCTCAGAAAAGTGTATGTTTAAGAGCTATGCTGGAAACAGCATAGCAAGTTTAAATAAGGCTAGTCCGTTATCAACTTGAAAAAGTGGCACCGAGTCGGTGCTTTTTT
4|sgAASS_2|AASS	CATCACAAACAAAGTTAACA	0	0	0	0	0	0	0	0	0	10157	AASS	AASS	4|sg_hAASS_02|AASS	AASS	ACCGCATCACAAACAAAGTTAACAGTTTAAGAGCTATGCTGGAAACAGCATAGCAAGTTTAAATAAGGCTAGTCCGTTATCAACTTGAAAAAGTGGCACCGAGTCGGTGCTTTTTT
4|sgAASS_3|AASS	CGTGCTCAGTCACTTTCAAT	0	0	0	0	0	0	0	0	0	10157	AASS	AASS	4|sg_hAASS_03|AASS	AASS	ACCGCGTGCTCAGTCACTTTCAATGTTTAAGAGCTATGCTGGAAACAGCATAGCAAGTTTAAATAAGGCTAGTCCGTTATCAACTTGAAAAAGTGGCACCGAGTCGGTGCTTTTTT
4|sgAASS_4|AASS	GGGTAGTGGCATTTGGACAG	0	0	28949	1	0	0	0	0	0	10157	AASS	AASS	4|sg_hAASS_04|AASS	AASS	ACCGGGGTAGTGGCATTTGGACAGGTTTAAGAGCTATGCTGGAAACAGCATAGCAAGTTTAAATAAGGCTAGTCCGTTATCAACTTGAAAAAGTGGCACCGAGTCGGTGCTTTTTT
4|sgAATF_1|AATF	AAACCACCTCTAGAAAAGCA	0	0	1	0	0	0	0	0	0	26574	AATF	AATF	4|sg_hAATF_01|AATF	AATF	ACCGAAACCACCTCTAGAAAAGCAGTTTAAGAGCTATGCTGGAAACAGCATAGCAAGTTTAAATAAGGCTAGTCCGTTATCAACTTGAAAAAGTGGCACCGAGTCGGTGCTTTTTT
4|sgAATF_2|AATF	AGAAACTTTGACACTAGAGA	0	0	0	0	0	0	0	0	0	26574	AATF	AATF	4|sg_hAATF_02|AATF	AATF	ACCGAGAAACTTTGACACTAGAGAGTTTAAGAGCTATGCTGGAAACAGCATAGCAAGTTTAAATAAGGCTAGTCCGTTATCAACTTGAAAAAGTGGCACCGAGTCGGTGCTTTTTT
4|sgAATF_3|AATF	AGGCACTTAAAGCATTGTTG	0	0	0	0	0	0	0	0	0	26574	AATF	AATF	4|sg_hAATF_03|AATF	AATF	ACCGAGGCACTTAAAGCATTGTTGGTTTAAGAGCTATGCTGGAAACAGCATAGCAAGTTTAAATAAGGCTAGTCCGTTATCAACTTGAAAAAGTGGCACCGAGTCGGTGCTTTTTT
4|sgAATF_4|AATF	GAATATGATGAGGACGACCT	0	0	0	0	0	0	0	0	0	26574	AATF	AATF	4|sg_hAATF_04|AATF	AATF	ACCGGAATATGATGAGGACGACCTGTTTAAGAGCTATGCTGGAAACAGCATAGCAAGTTTAAATAAGGCTAGTCCGTTATCAACTTGAAAAAGTGGCACCGAGTCGGTGCTTTTTT
4|sgAATK_1|AATK	AGCACCGGAACCACGCCCGG	0	0	1	0	0	1	0	6385	1	9625	AATK	AATK	4|sg_hAATK_01|AATK	AATK	ACCGAGCACCGGAACCACGCCCGGGTTTAAGAGCTATGCTGGAAACAGCATAGCAAGTTTAAATAAGGCTAGTCCGTTATCAACTTGAAAAAGTGGCACCGAGTCGGTGCTTTTTT
4|sgAATK_2|AATK	CTCCTCAAGTCCACAGACGT	0	0	0	0	0	0	0	0	0	9625	AATK	AATK	4|sg_hAATK_02|AATK	AATK	ACCGCTCCTCAAGTCCACAGACGTGTTTAAGAGCTATGCTGGAAACAGCATAGCAAGTTTAAATAAGGCTAGTCCGTTATCAACTTGAAAAAGTGGCACCGAGTCGGTGCTTTTTT
4|sgAATK_3|AATK	GCATAGCAACCTGCTCGTCG	0	0	0	0	0	0	0	0	0	9625	AATK	AATK	4|sg_hAATK_03|AATK	AATK	ACCGGCATAGCAACCTGCTCGTCGGTTTAAGAGCTATGCTGGAAACAGCATAGCAAGTTTAAATAAGGCTAGTCCGTTATCAACTTGAAAAAGTGGCACCGAGTCGGTGCTTTTTT
4|sgAATK_4|AATK	GTGTCAGCCAACAACAACAG	0	0	0	0	0	0	0	0	0	9625	AATK	AATK	4|sg_hAATK_04|AATK	AATK	ACCGGTGTCAGCCAACAACAACAGGTTTAAGAGCTATGCTGGAAACAGCATAGCAAGTTTAAATAAGGCTAGTCCGTTATCAACTTGAAAAAGTGGCACCGAGTCGGTGCTTTTTT
4|sgABAT_1|ABAT	CCTTAAAGACCATCTTCATG	0	0	0	0	0	0	0	0	0	18	ABAT	ABAT	4|sg_hABAT_01|ABAT	ABAT	ACCGCCTTAAAGACCATCTTCATGGTTTAAGAGCTATGCTGGAAACAGCATAGCAAGTTTAAATAAGGCTAGTCCGTTATCAACTTGAAAAAGTGGCACCGAGTCGGTGCTTTTTT
4|sgABAT_2|ABAT	GAAAGAAGTCATCGGATGCG	0	0	0	0	0	0	0	0	0	18	ABAT	ABAT	4|sg_hABAT_02|ABAT	ABAT	ACCGGAAAGAAGTCATCGGATGCGGTTTAAGAGCTATGCTGGAAACAGCATAGCAAGTTTAAATAAGGCTAGTCCGTTATCAACTTGAAAAAGTGGCACCGAGTCGGTGCTTTTTT
4|sgABAT_3|ABAT	GTGAATGGCTTTAGAGTGCG	0	0	0	0	0	0	0	0	0	18	ABAT	ABAT	4|sg_hABAT_03|ABAT	ABAT	ACCGGTGAATGGCTTTAGAGTGCGGTTTAAGAGCTATGCTGGAAACAGCATAGCAAGTTTAAATAAGGCTAGTCCGTTATCAACTTGAAAAAGTGGCACCGAGTCGGTGCTTTTTT
4|sgABAT_4|ABAT	TGCAATTACGAAGAGAGCCG	0	0	0	0	0	0	0	0	0	18	ABAT	ABAT	4|sg_hABAT_04|ABAT	ABAT	ACCGTGCAATTACGAAGAGAGCCGGTTTAAGAGCTATGCTGGAAACAGCATAGCAAGTTTAAATAAGGCTAGTCCGTTATCAACTTGAAAAAGTGGCACCGAGTCGGTGCTTTTTT
4|sgABCA1_1|ABCA1	AATGCAGAGAAAGCTATCTG	0	0	0	0	0	0	0	0	0	19	ABCA1	ABCA1	4|sg_hABCA1_01|ABCA1	ABCA1	ACCGAATGCAGAGAAAGCTATCTGGTTTAAGAGCTATGCTGGAAACAGCATAGCAAGTTTAAATAAGGCTAGTCCGTTATCAACTTGAAAAAGTGGCACCGAGTCGGTGCTTTTTT
4|sgABCA1_2|ABCA1	GGACACGCCCAGCTTCAAGT	0	0	5385	0	0	0	0	0	0	19	ABCA1	ABCA1	4|sg_hABCA1_02|ABCA1	ABCA1	ACCGGGACACGCCCAGCTTCAAGTGTTTAAGAGCTATGCTGGAAACAGCATAGCAAGTTTAAATAAGGCTAGTCCGTTATCAACTTGAAAAAGTGGCACCGAGTCGGTGCTTTTTT
4|sgABCA1_3|ABCA1	GTGGCATGGCAGGACTACGT	0	0	0	0	0	0	0	0	0	19	ABCA1	ABCA1	4|sg_hABCA1_03|ABCA1	ABCA1	ACCGGTGGCATGGCAGGACTACGTGTTTAAGAGCTATGCTGGAAACAGCATAGCAAGTTTAAATAAGGCTAGTCCGTTATCAACTTGAAAAAGTGGCACCGAGTCGGTGCTTTTTT
4|sgABCA1_4|ABCA1	TTGGACAGCCCAAGACATCG	0	0	0	0	0	0	0	0	0	19	ABCA1	ABCA1	4|sg_hABCA1_04|ABCA1	ABCA1	ACCGTTGGACAGCCCAAGACATCGGTTTAAGAGCTATGCTGGAAACAGCATAGCAAGTTTAAATAAGGCTAGTCCGTTATCAACTTGAAAAAGTGGCACCGAGTCGGTGCTTTTTT
4|sgABCA10_1|ABCA10	ACTCTCTGAAATAACTGACA	0	0	0	0	0	0	0	0	0	10349	ABCA10	ABCA10	4|sg_hABCA10_01|ABCA10	ABCA10	ACCGACTCTCTGAAATAACTGACAGTTTAAGAGCTATGCTGGAAACAGCATAGCAAGTTTAAATAAGGCTAGTCCGTTATCAACTTGAAAAAGTGGCACCGAGTCGGTGCTTTTTT
4|sgABCA10_2|ABCA10	GACACTTCAGTGAATGCACG	0	0	0	0	0	0	0	0	0	10349	ABCA10	ABCA10	4|sg_hABCA10_02|ABCA10	ABCA10	ACCGGACACTTCAGTGAATGCACGGTTTAAGAGCTATGCTGGAAACAGCATAGCAAGTTTAAATAAGGCTAGTCCGTTATCAACTTGAAAAAGTGGCACCGAGTCGGTGCTTTTTT
4|sgABCA10_3|ABCA10	GGGTACTGAAGAGGATAAGT	0	0	0	0	0	0	0	0	0	10349	ABCA10	ABCA10	4|sg_hABCA10_03|ABCA10	ABCA10	ACCGGGGTACTGAAGAGGATAAGTGTTTAAGAGCTATGCTGGAAACAGCATAGCAAGTTTAAATAAGGCTAGTCCGTTATCAACTTGAAAAAGTGGCACCGAGTCGGTGCTTTTTT
4|sgABCA10_4|ABCA10	TCCTTATTAAAACACTCATG	4	0	5	0	1	2	1	41973	1	10349	ABCA10	ABCA10	4|sg_hABCA10_04|ABCA10	ABCA10	ACCGTCCTTATTAAAACACTCATGGTTTAAGAGCTATGCTGGAAACAGCATAGCAAGTTTAAATAAGGCTAGTCCGTTATCAACTTGAAAAAGTGGCACCGAGTCGGTGCTTTTTT
4|sgABCA12_1|ABCA12	ACGGTCATATAATACACAAG	0	0	0	0	0	0	0	0	0	26154	ABCA12	ABCA12	4|sg_hABCA12_01|ABCA12	ABCA12	ACCGACGGTCATATAATACACAAGGTTTAAGAGCTATGCTGGAAACAGCATAGCAAGTTTAAATAAGGCTAGTCCGTTATCAACTTGAAAAAGTGGCACCGAGTCGGTGCTTTTTT
4|sgABCA12_2|ABCA12	ATGGTGCTAAATGATCCTTG	0	0	0	0	0	0	0	0	0	26154	ABCA12	ABCA12	4|sg_hABCA12_02|ABCA12	ABCA12	ACCGATGGTGCTAAATGATCCTTGGTTTAAGAGCTATGCTGGAAACAGCATAGCAAGTTTAAATAAGGCTAGTCCGTTATCAACTTGAAAAAGTGGCACCGAGTCGGTGCTTTTTT
4|sgABCA12_3|ABCA12	GAGGTGATACCCATCGCCAA	0	0	0	0	0	0	0	0	0	26154	ABCA12	ABCA12	4|sg_hABCA12_03|ABCA12	ABCA12	ACCGGAGGTGATACCCATCGCCAAGTTTAAGAGCTATGCTGGAAACAGCATAGCAAGTTTAAATAAGGCTAGTCCGTTATCAACTTGAAAAAGTGGCACCGAGTCGGTGCTTTTTT
4|sgABCA12_4|ABCA12	GGCAGCTATAAATACAACCC	0	0	0	0	0	0	0	0	0	26154	ABCA12	ABCA12	4|sg_hABCA12_04|ABCA12	ABCA12	ACCGGGCAGCTATAAATACAACCCGTTTAAGAGCTATGCTGGAAACAGCATAGCAAGTTTAAATAAGGCTAGTCCGTTATCAACTTGAAAAAGTGGCACCGAGTCGGTGCTTTTTT
4|sgABCA13_1|ABCA13	ACAATTTAGCTGATTCGGCG	0	0	0	0	0	0	0	0	0	154664	ABCA13	ABCA13	4|sg_hABCA13_01|ABCA13	ABCA13	ACCGACAATTTAGCTGATTCGGCGGTTTAAGAGCTATGCTGGAAACAGCATAGCAAGTTTAAATAAGGCTAGTCCGTTATCAACTTGAAAAAGTGGCACCGAGTCGGTGCTTTTTT
4|sgABCA13_2|ABCA13	CAATGACTTCCATAATTGGG	0	0	0	0	0	0	0	0	0	154664	ABCA13	ABCA13	4|sg_hABCA13_02|ABCA13	ABCA13	ACCGCAATGACTTCCATAATTGGGGTTTAAGAGCTATGCTGGAAACAGCATAGCAAGTTTAAATAAGGCTAGTCCGTTATCAACTTGAAAAAGTGGCACCGAGTCGGTGCTTTTTT
4|sgABCA13_3|ABCA13	GGCTTCATTTAATAACACTG	0	0	0	0	0	0	0	0	0	154664	ABCA13	ABCA13	4|sg_hABCA13_03|ABCA13	ABCA13	ACCGGGCTTCATTTAATAACACTGGTTTAAGAGCTATGCTGGAAACAGCATAGCAAGTTTAAATAAGGCTAGTCCGTTATCAACTTGAAAAAGTGGCACCGAGTCGGTGCTTTTTT
4|sgABCA13_4|ABCA13	TATCAGGAAGACTTGCGAAG	0	0	0	0	0	0	0	0	0	154664	ABCA13	ABCA13	4|sg_hABCA13_04|ABCA13	ABCA13	ACCGTATCAGGAAGACTTGCGAAGGTTTAAGAGCTATGCTGGAAACAGCATAGCAAGTTTAAATAAGGCTAGTCCGTTATCAACTTGAAAAAGTGGCACCGAGTCGGTGCTTTTTT
4|sgABCA2_1|ABCA2	CATGTACGTGGCGATCCGAG	0	0	0	0	0	0	0	0	0	20	ABCA2	ABCA2	4|sg_hABCA2_01|ABCA2	ABCA2	ACCGCATGTACGTGGCGATCCGAGGTTTAAGAGCTATGCTGGAAACAGCATAGCAAGTTTAAATAAGGCTAGTCCGTTATCAACTTGAAAAAGTGGCACCGAGTCGGTGCTTTTTT
4|sgABCA2_2|ABCA2	CTTGTGTGGCAACAACCGGT	0	0	0	0	0	0	0	0	0	20	ABCA2	ABCA2	4|sg_hABCA2_02|ABCA2	ABCA2	ACCGCTTGTGTGGCAACAACCGGTGTTTAAGAGCTATGCTGGAAACAGCATAGCAAGTTTAAATAAGGCTAGTCCGTTATCAACTTGAAAAAGTGGCACCGAGTCGGTGCTTTTTT
4|sgABCA2_3|ABCA2	GATGTCGTGCCCGTAGATGG	0	0	0	0	0	0	0	0	0	20	ABCA2	ABCA2	4|sg_hABCA2_03|ABCA2	ABCA2	ACCGGATGTCGTGCCCGTAGATGGGTTTAAGAGCTATGCTGGAAACAGCATAGCAAGTTTAAATAAGGCTAGTCCGTTATCAACTTGAAAAAGTGGCACCGAGTCGGTGCTTTTTT
4|sgABCA2_4|ABCA2	TAGGGGATGAAATTGCCACG	1	0	7148	1	0	0	0	0	0	20	ABCA2	ABCA2	4|sg_hABCA2_04|ABCA2	ABCA2	ACCGTAGGGGATGAAATTGCCACGGTTTAAGAGCTATGCTGGAAACAGCATAGCAAGTTTAAATAAGGCTAGTCCGTTATCAACTTGAAAAAGTGGCACCGAGTCGGTGCTTTTTT
4|sgABCA3_1|ABCA3	AATGCGCATTTACTGACCGA	0	0	0	0	0	0	0	0	0	21	ABCA3	ABCA3	4|sg_hABCA3_01|ABCA3	ABCA3	ACCGAATGCGCATTTACTGACCGAGTTTAAGAGCTATGCTGGAAACAGCATAGCAAGTTTAAATAAGGCTAGTCCGTTATCAACTTGAAAAAGTGGCACCGAGTCGGTGCTTTTTT
4|sgABCA3_2|ABCA3	ACCTACGGTTCAGTTACACA	0	0	12719	0	0	0	0	0	0	21	ABCA3	ABCA3	4|sg_hABCA3_02|ABCA3	ABCA3	ACCGACCTACGGTTCAGTTACACAGTTTAAGAGCTATGCTGGAAACAGCATAGCAAGTTTAAATAAGGCTAGTCCGTTATCAACTTGAAAAAGTGGCACCGAGTCGGTGCTTTTTT
4|sgABCA3_3|ABCA3	AGTGGACGGGCATACATCAG	0	0	0	0	0	0	0	0	0	21	ABCA3	ABCA3	4|sg_hABCA3_03|ABCA3	ABCA3	ACCGAGTGGACGGGCATACATCAGGTTTAAGAGCTATGCTGGAAACAGCATAGCAAGTTTAAATAAGGCTAGTCCGTTATCAACTTGAAAAAGTGGCACCGAGTCGGTGCTTTTTT
4|sgABCA3_4|ABCA3	CCTCCTGAGTCCCGTCAACG	0	0	0	0	0	0	0	0	0	21	ABCA3	ABCA3	4|sg_hABCA3_04|ABCA3	ABCA3	ACCGCCTCCTGAGTCCCGTCAACGGTTTAAGAGCTATGCTGGAAACAGCATAGCAAGTTTAAATAAGGCTAGTCCGTTATCAACTTGAAAAAGTGGCACCGAGTCGGTGCTTTTTT
4|sgABCA4_1|ABCA4	AAAGACCGAGCCCCTAACAG	0	0	0	0	0	0	0	0	0	24	ABCA4	ABCA4	4|sg_hABCA4_01|ABCA4	ABCA4	ACCGAAAGACCGAGCCCCTAACAGGTTTAAGAGCTATGCTGGAAACAGCATAGCAAGTTTAAATAAGGCTAGTCCGTTATCAACTTGAAAAAGTGGCACCGAGTCGGTGCTTTTTT
4|sgABCA4_2|ABCA4	AGCACCATACCCGCAAACAG	0	0	0	0	0	0	0	0	0	24	ABCA4	ABCA4	4|sg_hABCA4_02|ABCA4	ABCA4	ACCGAGCACCATACCCGCAAACAGGTTTAAGAGCTATGCTGGAAACAGCATAGCAAGTTTAAATAAGGCTAGTCCGTTATCAACTTGAAAAAGTGGCACCGAGTCGGTGCTTTTTT
4|sgABCA4_3|ABCA4	AGGGTGTTGAGTTGCCACAG	0	0	0	0	0	0	0	0	0	24	ABCA4	ABCA4	4|sg_hABCA4_03|ABCA4	ABCA4	ACCGAGGGTGTTGAGTTGCCACAGGTTTAAGAGCTATGCTGGAAACAGCATAGCAAGTTTAAATAAGGCTAGTCCGTTATCAACTTGAAAAAGTGGCACCGAGTCGGTGCTTTTTT
4|sgABCA4_4|ABCA4	GATCCGAATGGACATAGACG	0	0	0	0	0	0	0	0	0	24	ABCA4	ABCA4	4|sg_hABCA4_04|ABCA4	ABCA4	ACCGGATCCGAATGGACATAGACGGTTTAAGAGCTATGCTGGAAACAGCATAGCAAGTTTAAATAAGGCTAGTCCGTTATCAACTTGAAAAAGTGGCACCGAGTCGGTGCTTTTTT
4|sgABCA5_1|ABCA5	AAAATGAATGATACCTCAGG	0	0	0	0	0	0	0	0	0	23461	ABCA5	ABCA5	4|sg_hABCA5_01|ABCA5	ABCA5	ACCGAAAATGAATGATACCTCAGGGTTTAAGAGCTATGCTGGAAACAGCATAGCAAGTTTAAATAAGGCTAGTCCGTTATCAACTTGAAAAAGTGGCACCGAGTCGGTGCTTTTTT
4|sgABCA5_2|ABCA5	AAATTATGAGGAGTTATCAG	0	0	0	0	0	0	0	0	0	23461	ABCA5	ABCA5	4|sg_hABCA5_02|ABCA5	ABCA5	ACCGAAATTATGAGGAGTTATCAGGTTTAAGAGCTATGCTGGAAACAGCATAGCAAGTTTAAATAAGGCTAGTCCGTTATCAACTTGAAAAAGTGGCACCGAGTCGGTGCTTTTTT
4|sgABCA5_3|ABCA5	GAAATAGATACCTTTCCCCG	0	0	0	0	0	0	0	0	0	23461	ABCA5	ABCA5	4|sg_hABCA5_03|ABCA5	ABCA5	ACCGGAAATAGATACCTTTCCCCGGTTTAAGAGCTATGCTGGAAACAGCATAGCAAGTTTAAATAAGGCTAGTCCGTTATCAACTTGAAAAAGTGGCACCGAGTCGGTGCTTTTTT
4|sgABCA5_4|ABCA5	TGACAGTGACTATGTATCCG	0	0	0	0	0	0	0	0	0	23461	ABCA5	ABCA5	4|sg_hABCA5_04|ABCA5	ABCA5	ACCGTGACAGTGACTATGTATCCGGTTTAAGAGCTATGCTGGAAACAGCATAGCAAGTTTAAATAAGGCTAGTCCGTTATCAACTTGAAAAAGTGGCACCGAGTCGGTGCTTTTTT
4|sgABCA6_1|ABCA6	AACCAATCACCCTGTGATGG	2	0	2	0	3	2	0	23851	1	23460	ABCA6	ABCA6	4|sg_hABCA6_01|ABCA6	ABCA6	ACCGAACCAATCACCCTGTGATGGGTTTAAGAGCTATGCTGGAAACAGCATAGCAAGTTTAAATAAGGCTAGTCCGTTATCAACTTGAAAAAGTGGCACCGAGTCGGTGCTTTTTT
4|sgABCA6_2|ABCA6	CAGACAGCTGTGAGTGACAT	0	0	0	0	0	0	0	0	0	23460	ABCA6	ABCA6	4|sg_hABCA6_02|ABCA6	ABCA6	ACCGCAGACAGCTGTGAGTGACATGTTTAAGAGCTATGCTGGAAACAGCATAGCAAGTTTAAATAAGGCTAGTCCGTTATCAACTTGAAAAAGTGGCACCGAGTCGGTGCTTTTTT
4|sgABCA6_3|ABCA6	GGCACCAAATAAAACACACA	0	0	0	0	0	0	0	0	0	23460	ABCA6	ABCA6	4|sg_hABCA6_03|ABCA6	ABCA6	ACCGGGCACCAAATAAAACACACAGTTTAAGAGCTATGCTGGAAACAGCATAGCAAGTTTAAATAAGGCTAGTCCGTTATCAACTTGAAAAAGTGGCACCGAGTCGGTGCTTTTTT
4|sgABCA6_4|ABCA6	TTGTATATGAGTCTCCTGAA	0	0	0	0	0	0	0	0	0	23460	ABCA6	ABCA6	4|sg_hABCA6_04|ABCA6	ABCA6	ACCGTTGTATATGAGTCTCCTGAAGTTTAAGAGCTATGCTGGAAACAGCATAGCAAGTTTAAATAAGGCTAGTCCGTTATCAACTTGAAAAAGTGGCACCGAGTCGGTGCTTTTTT
4|sgABCA7_1|ABCA7	AGTACGGGATCCCTGAACCA	0	0	0	0	0	0	0	0	0	10347	ABCA7	ABCA7	4|sg_hABCA7_01|ABCA7	ABCA7	ACCGAGTACGGGATCCCTGAACCAGTTTAAGAGCTATGCTGGAAACAGCATAGCAAGTTTAAATAAGGCTAGTCCGTTATCAACTTGAAAAAGTGGCACCGAGTCGGTGCTTTTTT
4|sgABCA7_2|ABCA7	CTGGCCTAGACGTAACCCTA	0	0	0	0	0	0	0	0	0	10347	ABCA7	ABCA7	4|sg_hABCA7_02|ABCA7	ABCA7	ACCGCTGGCCTAGACGTAACCCTAGTTTAAGAGCTATGCTGGAAACAGCATAGCAAGTTTAAATAAGGCTAGTCCGTTATCAACTTGAAAAAGTGGCACCGAGTCGGTGCTTTTTT
4|sgABCA7_3|ABCA7	TCAAACAGCACGTTGTACTG	0	0	0	0	0	0	0	0	0	10347	ABCA7	ABCA7	4|sg_hABCA7_03|ABCA7	ABCA7	ACCGTCAAACAGCACGTTGTACTGGTTTAAGAGCTATGCTGGAAACAGCATAGCAAGTTTAAATAAGGCTAGTCCGTTATCAACTTGAAAAAGTGGCACCGAGTCGGTGCTTTTTT
4|sgABCA7_4|ABCA7	TGGACATTGACGTGGTCACG	0	0	0	0	0	0	0	0	0	10347	ABCA7	ABCA7	4|sg_hABCA7_04|ABCA7	ABCA7	ACCGTGGACATTGACGTGGTCACGGTTTAAGAGCTATGCTGGAAACAGCATAGCAAGTTTAAATAAGGCTAGTCCGTTATCAACTTGAAAAAGTGGCACCGAGTCGGTGCTTTTTT
4|sgABCA8_1|ABCA8	AAATTATCAGCCAAAAGCGA	0	0	0	0	0	0	0	0	0	10351	ABCA8	ABCA8	4|sg_hABCA8_01|ABCA8	ABCA8	ACCGAAATTATCAGCCAAAAGCGAGTTTAAGAGCTATGCTGGAAACAGCATAGCAAGTTTAAATAAGGCTAGTCCGTTATCAACTTGAAAAAGTGGCACCGAGTCGGTGCTTTTTT
4|sgABCA8_2|ABCA8	CTGTTAATGTCACAAGAGAG	0	0	0	0	0	0	0	0	0	10351	ABCA8	ABCA8	4|sg_hABCA8_02|ABCA8	ABCA8	ACCGCTGTTAATGTCACAAGAGAGGTTTAAGAGCTATGCTGGAAACAGCATAGCAAGTTTAAATAAGGCTAGTCCGTTATCAACTTGAAAAAGTGGCACCGAGTCGGTGCTTTTTT
4|sgABCA8_3|ABCA8	GACACCCCCAAAAGACAGTG	0	0	0	0	0	0	0	0	0	10351	ABCA8	ABCA8	4|sg_hABCA8_03|ABCA8	ABCA8	ACCGGACACCCCCAAAAGACAGTGGTTTAAGAGCTATGCTGGAAACAGCATAGCAAGTTTAAATAAGGCTAGTCCGTTATCAACTTGAAAAAGTGGCACCGAGTCGGTGCTTTTTT
4|sgABCA8_4|ABCA8	GCAAATCTGCGCAATTGCAA	1	1	1	60298	4	2	45	0	2	10351	ABCA8	ABCA8	4|sg_hABCA8_04|ABCA8	ABCA8	ACCGGCAAATCTGCGCAATTGCAAGTTTAAGAGCTATGCTGGAAACAGCATAGCAAGTTTAAATAAGGCTAGTCCGTTATCAACTTGAAAAAGTGGCACCGAGTCGGTGCTTTTTT
4|sgABCA9_1|ABCA9	ATATCAGAAAAGTTACCCGT	0	0	0	0	0	0	0	0	0	10350	ABCA9	ABCA9	4|sg_hABCA9_01|ABCA9	ABCA9	ACCGATATCAGAAAAGTTACCCGTGTTTAAGAGCTATGCTGGAAACAGCATAGCAAGTTTAAATAAGGCTAGTCCGTTATCAACTTGAAAAAGTGGCACCGAGTCGGTGCTTTTTT
4|sgABCA9_2|ABCA9	CTTGATAGATGTTCTAACCA	0	0	0	0	0	0	0	0	0	10350	ABCA9	ABCA9	4|sg_hABCA9_02|ABCA9	ABCA9	ACCGCTTGATAGATGTTCTAACCAGTTTAAGAGCTATGCTGGAAACAGCATAGCAAGTTTAAATAAGGCTAGTCCGTTATCAACTTGAAAAAGTGGCACCGAGTCGGTGCTTTTTT
4|sgABCA9_3|ABCA9	TGGCAGGAAGAACAATCATG	0	0	0	0	0	0	0	0	0	10350	ABCA9	ABCA9	4|sg_hABCA9_03|ABCA9	ABCA9	ACCGTGGCAGGAAGAACAATCATGGTTTAAGAGCTATGCTGGAAACAGCATAGCAAGTTTAAATAAGGCTAGTCCGTTATCAACTTGAAAAAGTGGCACCGAGTCGGTGCTTTTTT
4|sgABCA9_4|ABCA9	TTATTTCTAACTAGACAGGA	0	0	0	0	0	0	0	0	0	10350	ABCA9	ABCA9	4|sg_hABCA9_04|ABCA9	ABCA9	ACCGTTATTTCTAACTAGACAGGAGTTTAAGAGCTATGCTGGAAACAGCATAGCAAGTTTAAATAAGGCTAGTCCGTTATCAACTTGAAAAAGTGGCACCGAGTCGGTGCTTTTTT
4|sgABCB1_1|ABCB1	ATTGACAGCTATTCGAAGAG	0	0	0	0	0	0	0	0	0	5243	ABCB1	ABCB1	4|sg_hABCB1_01|ABCB1	ABCB1	ACCGATTGACAGCTATTCGAAGAGGTTTAAGAGCTATGCTGGAAACAGCATAGCAAGTTTAAATAAGGCTAGTCCGTTATCAACTTGAAAAAGTGGCACCGAGTCGGTGCTTTTTT
4|sgABCB1_2|ABCB1	CTGGAGAGATCCTCACCAAG	0	0	0	0	0	0	0	0	0	5243	ABCB1	ABCB1	4|sg_hABCB1_02|ABCB1	ABCB1	ACCGCTGGAGAGATCCTCACCAAGGTTTAAGAGCTATGCTGGAAACAGCATAGCAAGTTTAAATAAGGCTAGTCCGTTATCAACTTGAAAAAGTGGCACCGAGTCGGTGCTTTTTT
4|sgABCB1_3|ABCB1	TAGGTGATATCAATGATACA	0	0	0	0	0	0	0	0	0	5243	ABCB1	ABCB1	4|sg_hABCB1_03|ABCB1	ABCB1	ACCGTAGGTGATATCAATGATACAGTTTAAGAGCTATGCTGGAAACAGCATAGCAAGTTTAAATAAGGCTAGTCCGTTATCAACTTGAAAAAGTGGCACCGAGTCGGTGCTTTTTT
4|sgABCB1_4|ABCB1	TTTATAGTAGGATTTACACG	0	0	0	0	0	0	0	0	0	5243	ABCB1	ABCB1	4|sg_hABCB1_04|ABCB1	ABCB1	ACCGTTTATAGTAGGATTTACACGGTTTAAGAGCTATGCTGGAAACAGCATAGCAAGTTTAAATAAGGCTAGTCCGTTATCAACTTGAAAAAGTGGCACCGAGTCGGTGCTTTTTT
4|sgABCB10_1|ABCB10	ACAGCAATGATTGACACTGG	0	0	0	0	0	0	0	0	0	23456	ABCB10	ABCB10	4|sg_hABCB10_01|ABCB10	ABCB10	ACCGACAGCAATGATTGACACTGGGTTTAAGAGCTATGCTGGAAACAGCATAGCAAGTTTAAATAAGGCTAGTCCGTTATCAACTTGAAAAAGTGGCACCGAGTCGGTGCTTTTTT
4|sgABCB10_2|ABCB10	CTCAGTGCCGTGTTTCTGTG	82500	2	1	2	2	1	1	11	8	23456	ABCB10	ABCB10	4|sg_hABCB10_02|ABCB10	ABCB10	ACCGCTCAGTGCCGTGTTTCTGTGGTTTAAGAGCTATGCTGGAAACAGCATAGCAAGTTTAAATAAGGCTAGTCCGTTATCAACTTGAAAAAGTGGCACCGAGTCGGTGCTTTTTT
4|sgABCB10_3|ABCB10	GAGTTCACCCACGGTCATGT	0	0	0	0	0	0	0	0	0	23456	ABCB10	ABCB10	4|sg_hABCB10_03|ABCB10	ABCB10	ACCGGAGTTCACCCACGGTCATGTGTTTAAGAGCTATGCTGGAAACAGCATAGCAAGTTTAAATAAGGCTAGTCCGTTATCAACTTGAAAAAGTGGCACCGAGTCGGTGCTTTTTT
4|sgABCB10_4|ABCB10	TATCGCCGTTCACTGGCCTG	0	0	0	0	0	0	0	0	0	23456	ABCB10	ABCB10	4|sg_hABCB10_04|ABCB10	ABCB10	ACCGTATCGCCGTTCACTGGCCTGGTTTAAGAGCTATGCTGGAAACAGCATAGCAAGTTTAAATAAGGCTAGTCCGTTATCAACTTGAAAAAGTGGCACCGAGTCGGTGCTTTTTT
4|sgABCB11_1|ABCB11	GAGCTCCCCAGATTTAGCAA	0	0	0	0	0	0	0	0	0	8647	ABCB11	ABCB11	4|sg_hABCB11_01|ABCB11	ABCB11	ACCGGAGCTCCCCAGATTTAGCAAGTTTAAGAGCTATGCTGGAAACAGCATAGCAAGTTTAAATAAGGCTAGTCCGTTATCAACTTGAAAAAGTGGCACCGAGTCGGTGCTTTTTT
4|sgABCB11_2|ABCB11	GATTCTTTACTGGATTCGTG	0	0	0	0	0	0	0	0	0	8647	ABCB11	ABCB11	4|sg_hABCB11_02|ABCB11	ABCB11	ACCGGATTCTTTACTGGATTCGTGGTTTAAGAGCTATGCTGGAAACAGCATAGCAAGTTTAAATAAGGCTAGTCCGTTATCAACTTGAAAAAGTGGCACCGAGTCGGTGCTTTTTT
4|sgABCB11_3|ABCB11	TCAACATGGTCATTAAACCA	0	0	0	0	0	0	0	0	0	8647	ABCB11	ABCB11	4|sg_hABCB11_03|ABCB11	ABCB11	ACCGTCAACATGGTCATTAAACCAGTTTAAGAGCTATGCTGGAAACAGCATAGCAAGTTTAAATAAGGCTAGTCCGTTATCAACTTGAAAAAGTGGCACCGAGTCGGTGCTTTTTT
4|sgABCB11_4|ABCB11	TTTCAGAATCCTCCTAACTG	0	0	0	0	0	0	0	0	1	8647	ABCB11	ABCB11	4|sg_hABCB11_04|ABCB11	ABCB11	ACCGTTTCAGAATCCTCCTAACTGGTTTAAGAGCTATGCTGGAAACAGCATAGCAAGTTTAAATAAGGCTAGTCCGTTATCAACTTGAAAAAGTGGCACCGAGTCGGTGCTTTTTT
4|sgABCB4_1|ABCB4	ACACCACTGAACTCAATACG	0	0	0	0	0	0	0	0	0	5244	ABCB4	ABCB4	4|sg_hABCB4_01|ABCB4	ABCB4	ACCGACACCACTGAACTCAATACGGTTTAAGAGCTATGCTGGAAACAGCATAGCAAGTTTAAATAAGGCTAGTCCGTTATCAACTTGAAAAAGTGGCACCGAGTCGGTGCTTTTTT
4|sgABCB4_2|ABCB4	CATTTCGGACCGTAGACAGT	0	0	0	0	0	0	0	0	0	5244	ABCB4	ABCB4	4|sg_hABCB4_02|ABCB4	ABCB4	ACCGCATTTCGGACCGTAGACAGTGTTTAAGAGCTATGCTGGAAACAGCATAGCAAGTTTAAATAAGGCTAGTCCGTTATCAACTTGAAAAAGTGGCACCGAGTCGGTGCTTTTTT
4|sgABCB4_3|ABCB4	CCCTTCTCGAGCTAACGTCA	0	0	0	0	0	0	0	0	0	5244	ABCB4	ABCB4	4|sg_hABCB4_03|ABCB4	ABCB4	ACCGCCCTTCTCGAGCTAACGTCAGTTTAAGAGCTATGCTGGAAACAGCATAGCAAGTTTAAATAAGGCTAGTCCGTTATCAACTTGAAAAAGTGGCACCGAGTCGGTGCTTTTTT
4|sgABCB4_4|ABCB4	TGGCCGTGGAAATGTAACCA	0	21381	1	0	1	0	0	0	2	5244	ABCB4	ABCB4	4|sg_hABCB4_04|ABCB4	ABCB4	ACCGTGGCCGTGGAAATGTAACCAGTTTAAGAGCTATGCTGGAAACAGCATAGCAAGTTTAAATAAGGCTAGTCCGTTATCAACTTGAAAAAGTGGCACCGAGTCGGTGCTTTTTT
4|sgABCB5_1|ABCB5	AGACGTGGATAGAGTCACTA	0	0	0	0	0	0	0	0	0	340273	ABCB5	ABCB5	4|sg_hABCB5_01|ABCB5	ABCB5	ACCGAGACGTGGATAGAGTCACTAGTTTAAGAGCTATGCTGGAAACAGCATAGCAAGTTTAAATAAGGCTAGTCCGTTATCAACTTGAAAAAGTGGCACCGAGTCGGTGCTTTTTT
4|sgABCB5_2|ABCB5	CAAAGGTCGGACTACAATCG	0	0	0	0	0	0	0	0	0	340273	ABCB5	ABCB5	4|sg_hABCB5_02|ABCB5	ABCB5	ACCGCAAAGGTCGGACTACAATCGGTTTAAGAGCTATGCTGGAAACAGCATAGCAAGTTTAAATAAGGCTAGTCCGTTATCAACTTGAAAAAGTGGCACCGAGTCGGTGCTTTTTT
4|sgABCB5_3|ABCB5	GAAACCTTCGCAATAGCCCG	0	0	0	0	0	0	0	0	0	340273	ABCB5	ABCB5	4|sg_hABCB5_03|ABCB5	ABCB5	ACCGGAAACCTTCGCAATAGCCCGGTTTAAGAGCTATGCTGGAAACAGCATAGCAAGTTTAAATAAGGCTAGTCCGTTATCAACTTGAAAAAGTGGCACCGAGTCGGTGCTTTTTT
4|sgABCB5_4|ABCB5	TTTGGATTGGCAGATCATGG	0	0	0	0	0	0	0	0	1	340273	ABCB5	ABCB5	4|sg_hABCB5_04|ABCB5	ABCB5	ACCGTTTGGATTGGCAGATCATGGGTTTAAGAGCTATGCTGGAAACAGCATAGCAAGTTTAAATAAGGCTAGTCCGTTATCAACTTGAAAAAGTGGCACCGAGTCGGTGCTTTTTT
4|sgABCB6_1|ABCB6	CGAAGTGGAACGCTATCGAG	0	0	0	0	0	0	0	0	0	10058	ABCB6	ABCB6	4|sg_hABCB6_01|ABCB6	ABCB6	ACCGCGAAGTGGAACGCTATCGAGGTTTAAGAGCTATGCTGGAAACAGCATAGCAAGTTTAAATAAGGCTAGTCCGTTATCAACTTGAAAAAGTGGCACCGAGTCGGTGCTTTTTT
4|sgABCB6_2|ABCB6	GCACGTAGGGAGAGATGCGA	0	0	0	0	0	0	0	0	0	10058	ABCB6	ABCB6	4|sg_hABCB6_02|ABCB6	ABCB6	ACCGGCACGTAGGGAGAGATGCGAGTTTAAGAGCTATGCTGGAAACAGCATAGCAAGTTTAAATAAGGCTAGTCCGTTATCAACTTGAAAAAGTGGCACCGAGTCGGTGCTTTTTT
4|sgABCB6_3|ABCB6	GGAACGGGCACTCAATGTGT	0	0	7	0	0	0	0	0	0	10058	ABCB6	ABCB6	4|sg_hABCB6_03|ABCB6	ABCB6	ACCGGGAACGGGCACTCAATGTGTGTTTAAGAGCTATGCTGGAAACAGCATAGCAAGTTTAAATAAGGCTAGTCCGTTATCAACTTGAAAAAGTGGCACCGAGTCGGTGCTTTTTT
4|sgABCB6_4|ABCB6	TAGGTGCCAAACCAATTGAG	0	0	0	0	0	0	0	0	0	10058	ABCB6	ABCB6	4|sg_hABCB6_04|ABCB6	ABCB6	ACCGTAGGTGCCAAACCAATTGAGGTTTAAGAGCTATGCTGGAAACAGCATAGCAAGTTTAAATAAGGCTAGTCCGTTATCAACTTGAAAAAGTGGCACCGAGTCGGTGCTTTTTT
4|sgABCB7_1|ABCB7	AGTCATTAAAAAGTATCACA	0	0	0	0	0	0	0	0	0	22	ABCB7	ABCB7	4|sg_hABCB7_01|ABCB7	ABCB7	ACCGAGTCATTAAAAAGTATCACAGTTTAAGAGCTATGCTGGAAACAGCATAGCAAGTTTAAATAAGGCTAGTCCGTTATCAACTTGAAAAAGTGGCACCGAGTCGGTGCTTTTTT
4|sgABCB7_2|ABCB7	CACACCACAGACAGCTACCG	0	6	0	0	0	0	0	0	0	22	ABCB7	ABCB7	4|sg_hABCB7_02|ABCB7	ABCB7	ACCGCACACCACAGACAGCTACCGGTTTAAGAGCTATGCTGGAAACAGCATAGCAAGTTTAAATAAGGCTAGTCCGTTATCAACTTGAAAAAGTGGCACCGAGTCGGTGCTTTTTT
4|sgABCB7_3|ABCB7	GATTAAATACCAAAGCACTC	0	0	0	0	0	0	0	0	0	22	ABCB7	ABCB7	4|sg_hABCB7_03|ABCB7	ABCB7	ACCGGATTAAATACCAAAGCACTCGTTTAAGAGCTATGCTGGAAACAGCATAGCAAGTTTAAATAAGGCTAGTCCGTTATCAACTTGAAAAAGTGGCACCGAGTCGGTGCTTTTTT
4|sgABCB7_4|ABCB7	TCACAGTTGCAGTCACACGG	0	0	0	0	0	0	0	0	0	22	ABCB7	ABCB7	4|sg_hABCB7_04|ABCB7	ABCB7	ACCGTCACAGTTGCAGTCACACGGGTTTAAGAGCTATGCTGGAAACAGCATAGCAAGTTTAAATAAGGCTAGTCCGTTATCAACTTGAAAAAGTGGCACCGAGTCGGTGCTTTTTT
4|sgABCB8_1|ABCB8	AAGTACACAAGGGACCACGT	0	0	0	0	0	0	0	0	0	11194	ABCB8	ABCB8	4|sg_hABCB8_01|ABCB8	ABCB8	ACCGAAGTACACAAGGGACCACGTGTTTAAGAGCTATGCTGGAAACAGCATAGCAAGTTTAAATAAGGCTAGTCCGTTATCAACTTGAAAAAGTGGCACCGAGTCGGTGCTTTTTT
4|sgABCB8_2|ABCB8	CCTGCCCAAACAGGACAGAG	0	0	0	0	0	0	0	0	0	11194	ABCB8	ABCB8	4|sg_hABCB8_02|ABCB8	ABCB8	ACCGCCTGCCCAAACAGGACAGAGGTTTAAGAGCTATGCTGGAAACAGCATAGCAAGTTTAAATAAGGCTAGTCCGTTATCAACTTGAAAAAGTGGCACCGAGTCGGTGCTTTTTT
4|sgABCB8_3|ABCB8	CTTGGAACAAGGCGATGCCG	0	0	0	0	0	0	0	0	0	11194	ABCB8	ABCB8	4|sg_hABCB8_03|ABCB8	ABCB8	ACCGCTTGGAACAAGGCGATGCCGGTTTAAGAGCTATGCTGGAAACAGCATAGCAAGTTTAAATAAGGCTAGTCCGTTATCAACTTGAAAAAGTGGCACCGAGTCGGTGCTTTTTT
4|sgABCB8_4|ABCB8	TCTTTGACGCCAATAAGACA	0	0	0	0	0	0	0	0	0	11194	ABCB8	ABCB8	4|sg_hABCB8_04|ABCB8	ABCB8	ACCGTCTTTGACGCCAATAAGACAGTTTAAGAGCTATGCTGGAAACAGCATAGCAAGTTTAAATAAGGCTAGTCCGTTATCAACTTGAAAAAGTGGCACCGAGTCGGTGCTTTTTT
4|sgABCB9_1|ABCB9	GCCCCAGACGTAGTACATGT	0	0	0	0	0	0	0	0	0	23457	ABCB9	ABCB9	4|sg_hABCB9_01|ABCB9	ABCB9	ACCGGCCCCAGACGTAGTACATGTGTTTAAGAGCTATGCTGGAAACAGCATAGCAAGTTTAAATAAGGCTAGTCCGTTATCAACTTGAAAAAGTGGCACCGAGTCGGTGCTTTTTT
4|sgABCB9_2|ABCB9	TGGACACCATCATGATGATG	0	0	35290	0	0	1	0	4	4	23457	ABCB9	ABCB9	4|sg_hABCB9_02|ABCB9	ABCB9	ACCGTGGACACCATCATGATGATGGTTTAAGAGCTATGCTGGAAACAGCATAGCAAGTTTAAATAAGGCTAGTCCGTTATCAACTTGAAAAAGTGGCACCGAGTCGGTGCTTTTTT
4|sgABCB9_3|ABCB9	TGTCCTGGGAGATTGTATGG	0	0	0	0	0	0	0	0	0	23457	ABCB9	ABCB9	4|sg_hABCB9_03|ABCB9	ABCB9	ACCGTGTCCTGGGAGATTGTATGGGTTTAAGAGCTATGCTGGAAACAGCATAGCAAGTTTAAATAAGGCTAGTCCGTTATCAACTTGAAAAAGTGGCACCGAGTCGGTGCTTTTTT
4|sgABCB9_4|ABCB9	TTTGCCGCAGGTATTCGGGG	0	0	0	0	0	0	0	0	0	23457	ABCB9	ABCB9	4|sg_hABCB9_04|ABCB9	ABCB9	ACCGTTTGCCGCAGGTATTCGGGGGTTTAAGAGCTATGCTGGAAACAGCATAGCAAGTTTAAATAAGGCTAGTCCGTTATCAACTTGAAAAAGTGGCACCGAGTCGGTGCTTTTTT
4|sgABCC1_1|ABCC1	AAAATGTGATTGGCCCCAAG	0	0	0	0	0	0	0	0	0	4363	ABCC1	ABCC1	4|sg_hABCC1_01|ABCC1	ABCC1	ACCGAAAATGTGATTGGCCCCAAGGTTTAAGAGCTATGCTGGAAACAGCATAGCAAGTTTAAATAAGGCTAGTCCGTTATCAACTTGAAAAAGTGGCACCGAGTCGGTGCTTTTTT
4|sgABCC1_2|ABCC1	AACCTGACAGCATCGAGCGA	0	0	0	0	0	0	0	0	0	4363	ABCC1	ABCC1	4|sg_hABCC1_02|ABCC1	ABCC1	ACCGAACCTGACAGCATCGAGCGAGTTTAAGAGCTATGCTGGAAACAGCATAGCAAGTTTAAATAAGGCTAGTCCGTTATCAACTTGAAAAAGTGGCACCGAGTCGGTGCTTTTTT
4|sgABCC1_3|ABCC1	AGTACACGGAAAGCTTGACC	0	0	0	0	0	0	0	0	0	4363	ABCC1	ABCC1	4|sg_hABCC1_03|ABCC1	ABCC1	ACCGAGTACACGGAAAGCTTGACCGTTTAAGAGCTATGCTGGAAACAGCATAGCAAGTTTAAATAAGGCTAGTCCGTTATCAACTTGAAAAAGTGGCACCGAGTCGGTGCTTTTTT
4|sgABCC1_4|ABCC1	TCTGCTTCGTCAGTGGCATG	0	0	0	0	0	0	0	0	0	4363	ABCC1	ABCC1	4|sg_hABCC1_04|ABCC1	ABCC1	ACCGTCTGCTTCGTCAGTGGCATGGTTTAAGAGCTATGCTGGAAACAGCATAGCAAGTTTAAATAAGGCTAGTCCGTTATCAACTTGAAAAAGTGGCACCGAGTCGGTGCTTTTTT
4|sgABCC10_1|ABCC10	AAGGGTGTCACCCTTAGCGG	0	0	1	0	50552	1	1	1	1	89845	ABCC10	ABCC10	4|sg_hABCC10_01|ABCC10	ABCC10	ACCGAAGGGTGTCACCCTTAGCGGGTTTAAGAGCTATGCTGGAAACAGCATAGCAAGTTTAAATAAGGCTAGTCCGTTATCAACTTGAAAAAGTGGCACCGAGTCGGTGCTTTTTT
4|sgABCC10_2|ABCC10	CGTGTACCAAGCTTACTGGA	0	0	0	0	0	0	0	0	0	89845	ABCC10	ABCC10	4|sg_hABCC10_02|ABCC10	ABCC10	ACCGCGTGTACCAAGCTTACTGGAGTTTAAGAGCTATGCTGGAAACAGCATAGCAAGTTTAAATAAGGCTAGTCCGTTATCAACTTGAAAAAGTGGCACCGAGTCGGTGCTTTTTT
4|sgABCC10_3|ABCC10	GGGCCCTGAGAATCCCAACA	0	1	12713	0	0	0	0	0	0	89845	ABCC10	ABCC10	4|sg_hABCC10_03|ABCC10	ABCC10	ACCGGGGCCCTGAGAATCCCAACAGTTTAAGAGCTATGCTGGAAACAGCATAGCAAGTTTAAATAAGGCTAGTCCGTTATCAACTTGAAAAAGTGGCACCGAGTCGGTGCTTTTTT
4|sgABCC10_4|ABCC10	TGCACGTGTACCAAGCTTAC	0	0	0	0	0	0	0	0	0	89845	ABCC10	ABCC10	4|sg_hABCC10_04|ABCC10	ABCC10	ACCGTGCACGTGTACCAAGCTTACGTTTAAGAGCTATGCTGGAAACAGCATAGCAAGTTTAAATAAGGCTAGTCCGTTATCAACTTGAAAAAGTGGCACCGAGTCGGTGCTTTTTT
4|sgABCC11_1|ABCC11	AATACACATCACCTCAGGAG	0	0	0	0	0	0	0	0	0	85320	ABCC11	ABCC11	4|sg_hABCC11_01|ABCC11	ABCC11	ACCGAATACACATCACCTCAGGAGGTTTAAGAGCTATGCTGGAAACAGCATAGCAAGTTTAAATAAGGCTAGTCCGTTATCAACTTGAAAAAGTGGCACCGAGTCGGTGCTTTTTT
4|sgABCC11_2|ABCC11	CAAAGACCAGAGCTTTGCTG	5	1	3	0	0	2	0	57247	0	85320	ABCC11	ABCC11	4|sg_hABCC11_02|ABCC11	ABCC11	ACCGCAAAGACCAGAGCTTTGCTGGTTTAAGAGCTATGCTGGAAACAGCATAGCAAGTTTAAATAAGGCTAGTCCGTTATCAACTTGAAAAAGTGGCACCGAGTCGGTGCTTTTTT
4|sgABCC11_3|ABCC11	GACGGTCGGAATAGACGGCG	1	1	0	0	0	17067	0	1	0	85320	ABCC11	ABCC11	4|sg_hABCC11_03|ABCC11	ABCC11	ACCGGACGGTCGGAATAGACGGCGGTTTAAGAGCTATGCTGGAAACAGCATAGCAAGTTTAAATAAGGCTAGTCCGTTATCAACTTGAAAAAGTGGCACCGAGTCGGTGCTTTTTT
4|sgABCC11_4|ABCC11	TAAGCTTTGGATCATGAGCG	0	0	0	0	0	0	0	0	0	85320	ABCC11	ABCC11	4|sg_hABCC11_04|ABCC11	ABCC11	ACCGTAAGCTTTGGATCATGAGCGGTTTAAGAGCTATGCTGGAAACAGCATAGCAAGTTTAAATAAGGCTAGTCCGTTATCAACTTGAAAAAGTGGCACCGAGTCGGTGCTTTTTT
4|sgABCC12_1|ABCC12	AAAGACCATTAGGATCGGGA	0	0	0	0	0	0	0	0	0	94160	ABCC12	ABCC12	4|sg_hABCC12_01|ABCC12	ABCC12	ACCGAAAGACCATTAGGATCGGGAGTTTAAGAGCTATGCTGGAAACAGCATAGCAAGTTTAAATAAGGCTAGTCCGTTATCAACTTGAAAAAGTGGCACCGAGTCGGTGCTTTTTT
4|sgABCC12_2|ABCC12	ACGTACATTAAGGCTTCTGG	22477	27988	1	0	0	3	1	18049	6	94160	ABCC12	ABCC12	4|sg_hABCC12_02|ABCC12	ABCC12	ACCGACGTACATTAAGGCTTCTGGGTTTAAGAGCTATGCTGGAAACAGCATAGCAAGTTTAAATAAGGCTAGTCCGTTATCAACTTGAAAAAGTGGCACCGAGTCGGTGCTTTTTT
4|sgABCC12_3|ABCC12	GAGTCATATGTCGACAATGG	2	1	2	2	0	2	0	12946	0	94160	ABCC12	ABCC12	4|sg_hABCC12_03|ABCC12	ABCC12	ACCGGAGTCATATGTCGACAATGGGTTTAAGAGCTATGCTGGAAACAGCATAGCAAGTTTAAATAAGGCTAGTCCGTTATCAACTTGAAAAAGTGGCACCGAGTCGGTGCTTTTTT
4|sgABCC12_4|ABCC12	GCCAACCCAGACTTTCCCAG	0	0	0	0	0	0	0	0	0	94160	ABCC12	ABCC12	4|sg_hABCC12_04|ABCC12	ABCC12	ACCGGCCAACCCAGACTTTCCCAGGTTTAAGAGCTATGCTGGAAACAGCATAGCAAGTTTAAATAAGGCTAGTCCGTTATCAACTTGAAAAAGTGGCACCGAGTCGGTGCTTTTTT
4|sgABCC2_1|ABCC2	CAGAATTCATCACAAACGCA	0	0	0	0	0	0	0	0	0	1244	ABCC2	ABCC2	4|sg_hABCC2_01|ABCC2	ABCC2	ACCGCAGAATTCATCACAAACGCAGTTTAAGAGCTATGCTGGAAACAGCATAGCAAGTTTAAATAAGGCTAGTCCGTTATCAACTTGAAAAAGTGGCACCGAGTCGGTGCTTTTTT
4|sgABCC2_2|ABCC2	CAGGGTATAAATCTTAGTGG	0	0	0	0	0	0	0	0	0	1244	ABCC2	ABCC2	4|sg_hABCC2_02|ABCC2	ABCC2	ACCGCAGGGTATAAATCTTAGTGGGTTTAAGAGCTATGCTGGAAACAGCATAGCAAGTTTAAATAAGGCTAGTCCGTTATCAACTTGAAAAAGTGGCACCGAGTCGGTGCTTTTTT
4|sgABCC2_3|ABCC2	CATTATGGCAGGCCAACTTG	0	0	0	0	0	0	0	0	0	1244	ABCC2	ABCC2	4|sg_hABCC2_03|ABCC2	ABCC2	ACCGCATTATGGCAGGCCAACTTGGTTTAAGAGCTATGCTGGAAACAGCATAGCAAGTTTAAATAAGGCTAGTCCGTTATCAACTTGAAAAAGTGGCACCGAGTCGGTGCTTTTTT
4|sgABCC2_4|ABCC2	GATTGGTATATCGAACAGCA	0	0	0	0	0	0	0	0	0	1244	ABCC2	ABCC2	4|sg_hABCC2_04|ABCC2	ABCC2	ACCGGATTGGTATATCGAACAGCAGTTTAAGAGCTATGCTGGAAACAGCATAGCAAGTTTAAATAAGGCTAGTCCGTTATCAACTTGAAAAAGTGGCACCGAGTCGGTGCTTTTTT
4|sgABCC3_1|ABCC3	CCACGTACACGTACACCCAG	8059	0	1	1	0	0	0	1	0	8714	ABCC3	ABCC3	4|sg_hABCC3_01|ABCC3	ABCC3	ACCGCCACGTACACGTACACCCAGGTTTAAGAGCTATGCTGGAAACAGCATAGCAAGTTTAAATAAGGCTAGTCCGTTATCAACTTGAAAAAGTGGCACCGAGTCGGTGCTTTTTT
4|sgABCC3_2|ABCC3	GCAGGGCGTACAGTCTTCGG	0	0	0	0	0	0	0	0	0	8714	ABCC3	ABCC3	4|sg_hABCC3_02|ABCC3	ABCC3	ACCGGCAGGGCGTACAGTCTTCGGGTTTAAGAGCTATGCTGGAAACAGCATAGCAAGTTTAAATAAGGCTAGTCCGTTATCAACTTGAAAAAGTGGCACCGAGTCGGTGCTTTTTT
4|sgABCC3_3|ABCC3	GGCCACATGAGAGTCCACCG	0	0	0	0	0	0	0	0	0	8714	ABCC3	ABCC3	4|sg_hABCC3_03|ABCC3	ABCC3	ACCGGGCCACATGAGAGTCCACCGGTTTAAGAGCTATGCTGGAAACAGCATAGCAAGTTTAAATAAGGCTAGTCCGTTATCAACTTGAAAAAGTGGCACCGAGTCGGTGCTTTTTT
4|sgABCC3_4|ABCC3	TGAACCACCAGAAAAACAGG	0	0	0	0	0	0	0	0	0	8714	ABCC3	ABCC3	4|sg_hABCC3_04|ABCC3	ABCC3	ACCGTGAACCACCAGAAAAACAGGGTTTAAGAGCTATGCTGGAAACAGCATAGCAAGTTTAAATAAGGCTAGTCCGTTATCAACTTGAAAAAGTGGCACCGAGTCGGTGCTTTTTT
4|sgABCC4_1|ABCC4	AAGCACGGGTAAACCTTGCA	0	0	0	0	0	0	0	0	0	10257	ABCC4	ABCC4	4|sg_hABCC4_01|ABCC4	ABCC4	ACCGAAGCACGGGTAAACCTTGCAGTTTAAGAGCTATGCTGGAAACAGCATAGCAAGTTTAAATAAGGCTAGTCCGTTATCAACTTGAAAAAGTGGCACCGAGTCGGTGCTTTTTT
4|sgABCC4_2|ABCC4	CAGATTGACTATCTGGCCTG	0	0	0	0	0	0	0	0	0	10257	ABCC4	ABCC4	4|sg_hABCC4_02|ABCC4	ABCC4	ACCGCAGATTGACTATCTGGCCTGGTTTAAGAGCTATGCTGGAAACAGCATAGCAAGTTTAAATAAGGCTAGTCCGTTATCAACTTGAAAAAGTGGCACCGAGTCGGTGCTTTTTT
4|sgABCC4_3|ABCC4	GAAGGTACGATTCCTTAGTG	0	0	0	0	0	0	0	0	0	10257	ABCC4	ABCC4	4|sg_hABCC4_03|ABCC4	ABCC4	ACCGGAAGGTACGATTCCTTAGTGGTTTAAGAGCTATGCTGGAAACAGCATAGCAAGTTTAAATAAGGCTAGTCCGTTATCAACTTGAAAAAGTGGCACCGAGTCGGTGCTTTTTT
4|sgABCC4_4|ABCC4	GCGTCACTGCCACGAACACG	0	0	0	0	0	0	0	0	0	10257	ABCC4	ABCC4	4|sg_hABCC4_04|ABCC4	ABCC4	ACCGGCGTCACTGCCACGAACACGGTTTAAGAGCTATGCTGGAAACAGCATAGCAAGTTTAAATAAGGCTAGTCCGTTATCAACTTGAAAAAGTGGCACCGAGTCGGTGCTTTTTT
4|sgABCC5_1|ABCC5	TACGGAAAGAGGCACCCATG	0	0	0	0	0	0	0	0	0	10057	ABCC5	ABCC5	4|sg_hABCC5_01|ABCC5	ABCC5	ACCGTACGGAAAGAGGCACCCATGGTTTAAGAGCTATGCTGGAAACAGCATAGCAAGTTTAAATAAGGCTAGTCCGTTATCAACTTGAAAAAGTGGCACCGAGTCGGTGCTTTTTT
4|sgABCC5_2|ABCC5	TGAAAAGGGCCATAATAACC	0	0	0	0	0	0	0	0	0	10057	ABCC5	ABCC5	4|sg_hABCC5_02|ABCC5	ABCC5	ACCGTGAAAAGGGCCATAATAACCGTTTAAGAGCTATGCTGGAAACAGCATAGCAAGTTTAAATAAGGCTAGTCCGTTATCAACTTGAAAAAGTGGCACCGAGTCGGTGCTTTTTT
4|sgABCC5_3|ABCC5	TGTTAAGACTAGAGAGACTG	0	0	0	0	0	0	0	0	0	10057	ABCC5	ABCC5	4|sg_hABCC5_03|ABCC5	ABCC5	ACCGTGTTAAGACTAGAGAGACTGGTTTAAGAGCTATGCTGGAAACAGCATAGCAAGTTTAAATAAGGCTAGTCCGTTATCAACTTGAAAAAGTGGCACCGAGTCGGTGCTTTTTT
4|sgABCC5_4|ABCC5	TTTATTCATAGAAATCCGCG	0	0	0	0	0	0	0	0	0	10057	ABCC5	ABCC5	4|sg_hABCC5_04|ABCC5	ABCC5	ACCGTTTATTCATAGAAATCCGCGGTTTAAGAGCTATGCTGGAAACAGCATAGCAAGTTTAAATAAGGCTAGTCCGTTATCAACTTGAAAAAGTGGCACCGAGTCGGTGCTTTTTT
4|sgABCC6_1|ABCC6	ACTATGATCCAATCAGCCTG	0	0	0	0	0	0	0	0	0	368	ABCC6	ABCC6	4|sg_hABCC6_01|ABCC6	ABCC6	ACCGACTATGATCCAATCAGCCTGGTTTAAGAGCTATGCTGGAAACAGCATAGCAAGTTTAAATAAGGCTAGTCCGTTATCAACTTGAAAAAGTGGCACCGAGTCGGTGCTTTTTT
4|sgABCC6_2|ABCC6	CAGACCACGATCCAGACGAG	0	0	0	0	0	0	0	0	0	368	ABCC6	ABCC6	4|sg_hABCC6_02|ABCC6	ABCC6	ACCGCAGACCACGATCCAGACGAGGTTTAAGAGCTATGCTGGAAACAGCATAGCAAGTTTAAATAAGGCTAGTCCGTTATCAACTTGAAAAAGTGGCACCGAGTCGGTGCTTTTTT
4|sgABCC6_3|ABCC6	GAGAACTGTGAGAGTCACAA	0	0	0	0	0	0	0	0	0	368	ABCC6	ABCC6	4|sg_hABCC6_03|ABCC6	ABCC6	ACCGGAGAACTGTGAGAGTCACAAGTTTAAGAGCTATGCTGGAAACAGCATAGCAAGTTTAAATAAGGCTAGTCCGTTATCAACTTGAAAAAGTGGCACCGAGTCGGTGCTTTTTT
4|sgABCC6_4|ABCC6	GGACAGCATCCAATACGGCA	0	0	0	0	0	0	0	0	0	368	ABCC6	ABCC6	4|sg_hABCC6_04|ABCC6	ABCC6	ACCGGGACAGCATCCAATACGGCAGTTTAAGAGCTATGCTGGAAACAGCATAGCAAGTTTAAATAAGGCTAGTCCGTTATCAACTTGAAAAAGTGGCACCGAGTCGGTGCTTTTTT
4|sgABCC8_1|ABCC8	CAGACCAACGAGATGCTCCG	0	0	0	0	0	0	0	0	0	6833	ABCC8	ABCC8	4|sg_hABCC8_01|ABCC8	ABCC8	ACCGCAGACCAACGAGATGCTCCGGTTTAAGAGCTATGCTGGAAACAGCATAGCAAGTTTAAATAAGGCTAGTCCGTTATCAACTTGAAAAAGTGGCACCGAGTCGGTGCTTTTTT
4|sgABCC8_2|ABCC8	CTACCGTCAAAGCTCTAGTG	0	0	0	0	0	0	0	0	0	6833	ABCC8	ABCC8	4|sg_hABCC8_02|ABCC8	ABCC8	ACCGCTACCGTCAAAGCTCTAGTGGTTTAAGAGCTATGCTGGAAACAGCATAGCAAGTTTAAATAAGGCTAGTCCGTTATCAACTTGAAAAAGTGGCACCGAGTCGGTGCTTTTTT
4|sgABCC8_3|ABCC8	GATGTTGTGATAGTAGACCA	0	0	0	0	0	0	0	0	0	6833	ABCC8	ABCC8	4|sg_hABCC8_03|ABCC8	ABCC8	ACCGGATGTTGTGATAGTAGACCAGTTTAAGAGCTATGCTGGAAACAGCATAGCAAGTTTAAATAAGGCTAGTCCGTTATCAACTTGAAAAAGTGGCACCGAGTCGGTGCTTTTTT
4|sgABCC8_4|ABCC8	TCAACGCCAGCGAATCAGTG	0	0	0	0	0	0	0	0	0	6833	ABCC8	ABCC8	4|sg_hABCC8_04|ABCC8	ABCC8	ACCGTCAACGCCAGCGAATCAGTGGTTTAAGAGCTATGCTGGAAACAGCATAGCAAGTTTAAATAAGGCTAGTCCGTTATCAACTTGAAAAAGTGGCACCGAGTCGGTGCTTTTTT
4|sgABCC9_1|ABCC9	AGAGAGGAAAACTCTCCGAC	0	0	0	0	0	0	0	0	0	10060	ABCC9	ABCC9	4|sg_hABCC9_01|ABCC9	ABCC9	ACCGAGAGAGGAAAACTCTCCGACGTTTAAGAGCTATGCTGGAAACAGCATAGCAAGTTTAAATAAGGCTAGTCCGTTATCAACTTGAAAAAGTGGCACCGAGTCGGTGCTTTTTT
4|sgABCC9_2|ABCC9	ATACACTATCGATGTTGTAG	0	0	0	0	0	0	0	0	0	10060	ABCC9	ABCC9	4|sg_hABCC9_02|ABCC9	ABCC9	ACCGATACACTATCGATGTTGTAGGTTTAAGAGCTATGCTGGAAACAGCATAGCAAGTTTAAATAAGGCTAGTCCGTTATCAACTTGAAAAAGTGGCACCGAGTCGGTGCTTTTTT
4|sgABCC9_3|ABCC9	GACTGCAAATCTGACCACCG	0	0	0	0	0	0	0	0	0	10060	ABCC9	ABCC9	4|sg_hABCC9_03|ABCC9	ABCC9	ACCGGACTGCAAATCTGACCACCGGTTTAAGAGCTATGCTGGAAACAGCATAGCAAGTTTAAATAAGGCTAGTCCGTTATCAACTTGAAAAAGTGGCACCGAGTCGGTGCTTTTTT
4|sgABCC9_4|ABCC9	TAAAGTACTGAATTGGCGCA	0	0	0	0	0	0	0	0	0	10060	ABCC9	ABCC9	4|sg_hABCC9_04|ABCC9	ABCC9	ACCGTAAAGTACTGAATTGGCGCAGTTTAAGAGCTATGCTGGAAACAGCATAGCAAGTTTAAATAAGGCTAGTCCGTTATCAACTTGAAAAAGTGGCACCGAGTCGGTGCTTTTTT
4|sgABCD1_1|ABCD1	AGTTCCTCATGAAGTATGTG	0	0	0	0	0	0	0	0	0	215	ABCD1	ABCD1	4|sg_hABCD1_01|ABCD1	ABCD1	ACCGAGTTCCTCATGAAGTATGTGGTTTAAGAGCTATGCTGGAAACAGCATAGCAAGTTTAAATAAGGCTAGTCCGTTATCAACTTGAAAAAGTGGCACCGAGTCGGTGCTTTTTT
4|sgABCD1_2|ABCD1	CTACATGCACTCGCGTGTGG	0	0	0	0	0	0	0	0	0	215	ABCD1	ABCD1	4|sg_hABCD1_02|ABCD1	ABCD1	ACCGCTACATGCACTCGCGTGTGGGTTTAAGAGCTATGCTGGAAACAGCATAGCAAGTTTAAATAAGGCTAGTCCGTTATCAACTTGAAAAAGTGGCACCGAGTCGGTGCTTTTTT
4|sgABCD1_3|ABCD1	GATCATGTCGTCGTACAAGG	0	0	7099	0	0	0	1	0	0	215	ABCD1	ABCD1	4|sg_hABCD1_03|ABCD1	ABCD1	ACCGGATCATGTCGTCGTACAAGGGTTTAAGAGCTATGCTGGAAACAGCATAGCAAGTTTAAATAAGGCTAGTCCGTTATCAACTTGAAAAAGTGGCACCGAGTCGGTGCTTTTTT
4|sgABCD1_4|ABCD1	GGCCACATACACCGACAGGA	0	0	0	0	0	0	0	0	0	215	ABCD1	ABCD1	4|sg_hABCD1_04|ABCD1	ABCD1	ACCGGGCCACATACACCGACAGGAGTTTAAGAGCTATGCTGGAAACAGCATAGCAAGTTTAAATAAGGCTAGTCCGTTATCAACTTGAAAAAGTGGCACCGAGTCGGTGCTTTTTT
4|sgABCD2_1|ABCD2	ATTACCTCTCAGTGACACAT	0	0	0	0	0	0	0	0	0	225	ABCD2	ABCD2	4|sg_hABCD2_01|ABCD2	ABCD2	ACCGATTACCTCTCAGTGACACATGTTTAAGAGCTATGCTGGAAACAGCATAGCAAGTTTAAATAAGGCTAGTCCGTTATCAACTTGAAAAAGTGGCACCGAGTCGGTGCTTTTTT
4|sgABCD2_2|ABCD2	CCCTGACCAATCTCTTACGG	0	0	0	0	0	0	0	0	0	225	ABCD2	ABCD2	4|sg_hABCD2_02|ABCD2	ABCD2	ACCGCCCTGACCAATCTCTTACGGGTTTAAGAGCTATGCTGGAAACAGCATAGCAAGTTTAAATAAGGCTAGTCCGTTATCAACTTGAAAAAGTGGCACCGAGTCGGTGCTTTTTT
4|sgABCD2_3|ABCD2	CCTTATTGCACTGTTGACGA	0	0	1	0	0	0	0	0	0	225	ABCD2	ABCD2	4|sg_hABCD2_03|ABCD2	ABCD2	ACCGCCTTATTGCACTGTTGACGAGTTTAAGAGCTATGCTGGAAACAGCATAGCAAGTTTAAATAAGGCTAGTCCGTTATCAACTTGAAAAAGTGGCACCGAGTCGGTGCTTTTTT
4|sgABCD2_4|ABCD2	CTGGAGCTGATGCTATTGAA	0	0	0	0	0	0	0	0	0	225	ABCD2	ABCD2	4|sg_hABCD2_04|ABCD2	ABCD2	ACCGCTGGAGCTGATGCTATTGAAGTTTAAGAGCTATGCTGGAAACAGCATAGCAAGTTTAAATAAGGCTAGTCCGTTATCAACTTGAAAAAGTGGCACCGAGTCGGTGCTTTTTT
4|sgABCD3_1|ABCD3	AATTAAACTTACAAGAGGCA	0	0	0	0	0	0	0	0	0	5825	ABCD3	ABCD3	4|sg_hABCD3_01|ABCD3	ABCD3	ACCGAATTAAACTTACAAGAGGCAGTTTAAGAGCTATGCTGGAAACAGCATAGCAAGTTTAAATAAGGCTAGTCCGTTATCAACTTGAAAAAGTGGCACCGAGTCGGTGCTTTTTT
4|sgABCD3_2|ABCD3	ACTCGACTTCGAAGACCCAT	1	1	0	20	1	1	79280	0	3	5825	ABCD3	ABCD3	4|sg_hABCD3_02|ABCD3	ABCD3	ACCGACTCGACTTCGAAGACCCATGTTTAAGAGCTATGCTGGAAACAGCATAGCAAGTTTAAATAAGGCTAGTCCGTTATCAACTTGAAAAAGTGGCACCGAGTCGGTGCTTTTTT
4|sgABCD3_3|ABCD3	TGGCAAATATGAGCGCACAA	0	0	0	0	0	0	0	0	0	5825	ABCD3	ABCD3	4|sg_hABCD3_03|ABCD3	ABCD3	ACCGTGGCAAATATGAGCGCACAAGTTTAAGAGCTATGCTGGAAACAGCATAGCAAGTTTAAATAAGGCTAGTCCGTTATCAACTTGAAAAAGTGGCACCGAGTCGGTGCTTTTTT
4|sgABCD3_4|ABCD3	TGTGTACTCTTGAGATGTCG	0	0	0	0	0	0	0	0	0	5825	ABCD3	ABCD3	4|sg_hABCD3_04|ABCD3	ABCD3	ACCGTGTGTACTCTTGAGATGTCGGTTTAAGAGCTATGCTGGAAACAGCATAGCAAGTTTAAATAAGGCTAGTCCGTTATCAACTTGAAAAAGTGGCACCGAGTCGGTGCTTTTTT
4|sgABCD4_1|ABCD4	AGCCACATCTGAGAGCGTCG	0	0	0	0	0	0	0	0	0	5826	ABCD4	ABCD4	4|sg_hABCD4_01|ABCD4	ABCD4	ACCGAGCCACATCTGAGAGCGTCGGTTTAAGAGCTATGCTGGAAACAGCATAGCAAGTTTAAATAAGGCTAGTCCGTTATCAACTTGAAAAAGTGGCACCGAGTCGGTGCTTTTTT
4|sgABCD4_2|ABCD4	GATCCCCAGTCAGTACTATG	0	0	0	0	0	0	0	0	0	5826	ABCD4	ABCD4	4|sg_hABCD4_02|ABCD4	ABCD4	ACCGGATCCCCAGTCAGTACTATGGTTTAAGAGCTATGCTGGAAACAGCATAGCAAGTTTAAATAAGGCTAGTCCGTTATCAACTTGAAAAAGTGGCACCGAGTCGGTGCTTTTTT
4|sgABCD4_3|ABCD4	GTAGTAGACGAGGGTGAACG	1	0	1	2	42946	0	3	1	0	5826	ABCD4	ABCD4	4|sg_hABCD4_03|ABCD4	ABCD4	ACCGGTAGTAGACGAGGGTGAACGGTTTAAGAGCTATGCTGGAAACAGCATAGCAAGTTTAAATAAGGCTAGTCCGTTATCAACTTGAAAAAGTGGCACCGAGTCGGTGCTTTTTT
4|sgABCD4_4|ABCD4	TTGCGATGACAACGTAACTC	0	0	0	5	0	0	0	0	0	5826	ABCD4	ABCD4	4|sg_hABCD4_04|ABCD4	ABCD4	ACCGTTGCGATGACAACGTAACTCGTTTAAGAGCTATGCTGGAAACAGCATAGCAAGTTTAAATAAGGCTAGTCCGTTATCAACTTGAAAAAGTGGCACCGAGTCGGTGCTTTTTT
4|sgABCE1_1|ABCE1	AGTTGTCCTGTAGTTCGAAT	0	0	0	0	0	0	0	0	0	6059	ABCE1	ABCE1	4|sg_hABCE1_01|ABCE1	ABCE1	ACCGAGTTGTCCTGTAGTTCGAATGTTTAAGAGCTATGCTGGAAACAGCATAGCAAGTTTAAATAAGGCTAGTCCGTTATCAACTTGAAAAAGTGGCACCGAGTCGGTGCTTTTTT
4|sgABCE1_2|ABCE1	CAATTGATAAGGCGCCAAAG	0	0	0	0	0	0	0	0	0	6059	ABCE1	ABCE1	4|sg_hABCE1_02|ABCE1	ABCE1	ACCGCAATTGATAAGGCGCCAAAGGTTTAAGAGCTATGCTGGAAACAGCATAGCAAGTTTAAATAAGGCTAGTCCGTTATCAACTTGAAAAAGTGGCACCGAGTCGGTGCTTTTTT
4|sgABCE1_3|ABCE1	CCAAAACTTCACCTGGACGA	0	0	0	0	0	0	0	0	0	6059	ABCE1	ABCE1	4|sg_hABCE1_03|ABCE1	ABCE1	ACCGCCAAAACTTCACCTGGACGAGTTTAAGAGCTATGCTGGAAACAGCATAGCAAGTTTAAATAAGGCTAGTCCGTTATCAACTTGAAAAAGTGGCACCGAGTCGGTGCTTTTTT
4|sgABCE1_4|ABCE1	TTTCAGATATATCATTGTGG	0	0	0	0	0	0	0	0	0	6059	ABCE1	ABCE1	4|sg_hABCE1_04|ABCE1	ABCE1	ACCGTTTCAGATATATCATTGTGGGTTTAAGAGCTATGCTGGAAACAGCATAGCAAGTTTAAATAAGGCTAGTCCGTTATCAACTTGAAAAAGTGGCACCGAGTCGGTGCTTTTTT
4|sgABCF1_1|ABCF1	CTGCAGAGGCCAAAGCACGG	0	0	0	0	0	0	0	0	0	23	ABCF1	ABCF1	4|sg_hABCF1_01|ABCF1	ABCF1	ACCGCTGCAGAGGCCAAAGCACGGGTTTAAGAGCTATGCTGGAAACAGCATAGCAAGTTTAAATAAGGCTAGTCCGTTATCAACTTGAAAAAGTGGCACCGAGTCGGTGCTTTTTT
4|sgABCF1_2|ABCF1	GATGGAGTATGAGCGCCAAG	0	0	0	0	0	0	0	0	0	23	ABCF1	ABCF1	4|sg_hABCF1_02|ABCF1	ABCF1	ACCGGATGGAGTATGAGCGCCAAGGTTTAAGAGCTATGCTGGAAACAGCATAGCAAGTTTAAATAAGGCTAGTCCGTTATCAACTTGAAAAAGTGGCACCGAGTCGGTGCTTTTTT
4|sgABCF1_3|ABCF1	GCAACACATCAATGTTGGGA	0	0	0	0	0	0	0	0	0	23	ABCF1	ABCF1	4|sg_hABCF1_03|ABCF1	ABCF1	ACCGGCAACACATCAATGTTGGGAGTTTAAGAGCTATGCTGGAAACAGCATAGCAAGTTTAAATAAGGCTAGTCCGTTATCAACTTGAAAAAGTGGCACCGAGTCGGTGCTTTTTT
4|sgABCF1_4|ABCF1	TGTAATTGCCCCTATAGTAG	0	0	0	0	0	0	0	0	0	23	ABCF1	ABCF1	4|sg_hABCF1_04|ABCF1	ABCF1	ACCGTGTAATTGCCCCTATAGTAGGTTTAAGAGCTATGCTGGAAACAGCATAGCAAGTTTAAATAAGGCTAGTCCGTTATCAACTTGAAAAAGTGGCACCGAGTCGGTGCTTTTTT
4|sgABCF2_1|ABCF2	AACCAATGAGGCCATAACGA	0	0	0	0	0	0	0	0	0	10061	ABCF2	ABCF2	4|sg_hABCF2_01|ABCF2	ABCF2	ACCGAACCAATGAGGCCATAACGAGTTTAAGAGCTATGCTGGAAACAGCATAGCAAGTTTAAATAAGGCTAGTCCGTTATCAACTTGAAAAAGTGGCACCGAGTCGGTGCTTTTTT
4|sgABCF2_2|ABCF2	ATGATCAGTACGTGAAGACG	0	1	1	0	0	20962	0	2	1	10061	ABCF2	ABCF2	4|sg_hABCF2_02|ABCF2	ABCF2	ACCGATGATCAGTACGTGAAGACGGTTTAAGAGCTATGCTGGAAACAGCATAGCAAGTTTAAATAAGGCTAGTCCGTTATCAACTTGAAAAAGTGGCACCGAGTCGGTGCTTTTTT
4|sgABCF2_3|ABCF2	CAGTCCATGCAAGATCCGCG	0	0	0	0	0	0	0	0	0	10061	ABCF2	ABCF2	4|sg_hABCF2_03|ABCF2	ABCF2	ACCGCAGTCCATGCAAGATCCGCGGTTTAAGAGCTATGCTGGAAACAGCATAGCAAGTTTAAATAAGGCTAGTCCGTTATCAACTTGAAAAAGTGGCACCGAGTCGGTGCTTTTTT
4|sgABCF2_4|ABCF2	GGGTCGTGAGCGATAAGGTG	43130	2	2	0	62440	0	3	9	1	10061	ABCF2	ABCF2	4|sg_hABCF2_04|ABCF2	ABCF2	ACCGGGGTCGTGAGCGATAAGGTGGTTTAAGAGCTATGCTGGAAACAGCATAGCAAGTTTAAATAAGGCTAGTCCGTTATCAACTTGAAAAAGTGGCACCGAGTCGGTGCTTTTTT
4|sgABCF3_1|ABCF3	ACTTCCAGGACTGCTAAAGA	0	0	0	0	0	0	0	0	0	55324	ABCF3	ABCF3	4|sg_hABCF3_01|ABCF3	ABCF3	ACCGACTTCCAGGACTGCTAAAGAGTTTAAGAGCTATGCTGGAAACAGCATAGCAAGTTTAAATAAGGCTAGTCCGTTATCAACTTGAAAAAGTGGCACCGAGTCGGTGCTTTTTT
4|sgABCF3_2|ABCF3	CAGCGGCTAGATGGTTACCG	0	0	0	0	0	0	0	0	0	55324	ABCF3	ABCF3	4|sg_hABCF3_02|ABCF3	ABCF3	ACCGCAGCGGCTAGATGGTTACCGGTTTAAGAGCTATGCTGGAAACAGCATAGCAAGTTTAAATAAGGCTAGTCCGTTATCAACTTGAAAAAGTGGCACCGAGTCGGTGCTTTTTT
4|sgABCF3_3|ABCF3	GCAGAGTGTTGTACATGCGC	0	0	0	0	0	0	0	0	0	55324	ABCF3	ABCF3	4|sg_hABCF3_03|ABCF3	ABCF3	ACCGGCAGAGTGTTGTACATGCGCGTTTAAGAGCTATGCTGGAAACAGCATAGCAAGTTTAAATAAGGCTAGTCCGTTATCAACTTGAAAAAGTGGCACCGAGTCGGTGCTTTTTT
4|sgABCF3_4|ABCF3	TGCGAGAGGATTTGCTACGG	0	0	0	0	0	0	0	0	0	55324	ABCF3	ABCF3	4|sg_hABCF3_04|ABCF3	ABCF3	ACCGTGCGAGAGGATTTGCTACGGGTTTAAGAGCTATGCTGGAAACAGCATAGCAAGTTTAAATAAGGCTAGTCCGTTATCAACTTGAAAAAGTGGCACCGAGTCGGTGCTTTTTT
4|sgABCG1_1|ABCG1	ATGAAAGGGCTCGCTCAAGG	0	0	0	0	0	0	0	0	0	9619	ABCG1	ABCG1	4|sg_hABCG1_01|ABCG1	ABCG1	ACCGATGAAAGGGCTCGCTCAAGGGTTTAAGAGCTATGCTGGAAACAGCATAGCAAGTTTAAATAAGGCTAGTCCGTTATCAACTTGAAAAAGTGGCACCGAGTCGGTGCTTTTTT
4|sgABCG1_2|ABCG1	CTTCAGGAACCGAATAGGAA	0	0	0	0	0	0	0	0	0	9619	ABCG1	ABCG1	4|sg_hABCG1_02|ABCG1	ABCG1	ACCGCTTCAGGAACCGAATAGGAAGTTTAAGAGCTATGCTGGAAACAGCATAGCAAGTTTAAATAAGGCTAGTCCGTTATCAACTTGAAAAAGTGGCACCGAGTCGGTGCTTTTTT
4|sgABCG1_3|ABCG1	GAGGCCGATCCCAATGTGCG	0	0	0	0	0	0	0	0	0	9619	ABCG1	ABCG1	4|sg_hABCG1_03|ABCG1	ABCG1	ACCGGAGGCCGATCCCAATGTGCGGTTTAAGAGCTATGCTGGAAACAGCATAGCAAGTTTAAATAAGGCTAGTCCGTTATCAACTTGAAAAAGTGGCACCGAGTCGGTGCTTTTTT
4|sgABCG1_4|ABCG1	GTCCACGCTGATGAACATCC	0	0	0	0	0	0	0	0	0	9619	ABCG1	ABCG1	4|sg_hABCG1_04|ABCG1	ABCG1	ACCGGTCCACGCTGATGAACATCCGTTTAAGAGCTATGCTGGAAACAGCATAGCAAGTTTAAATAAGGCTAGTCCGTTATCAACTTGAAAAAGTGGCACCGAGTCGGTGCTTTTTT
4|sgABCG2_1|ABCG2	AAAAAACGAACGGATTAACA	0	0	0	0	0	0	0	0	0	9429	ABCG2	ABCG2	4|sg_hABCG2_01|ABCG2	ABCG2	ACCGAAAAAACGAACGGATTAACAGTTTAAGAGCTATGCTGGAAACAGCATAGCAAGTTTAAATAAGGCTAGTCCGTTATCAACTTGAAAAAGTGGCACCGAGTCGGTGCTTTTTT
4|sgABCG2_2|ABCG2	GAATTACATCAACTTTCCGG	0	0	0	0	0	0	0	0	0	9429	ABCG2	ABCG2	4|sg_hABCG2_02|ABCG2	ABCG2	ACCGGAATTACATCAACTTTCCGGGTTTAAGAGCTATGCTGGAAACAGCATAGCAAGTTTAAATAAGGCTAGTCCGTTATCAACTTGAAAAAGTGGCACCGAGTCGGTGCTTTTTT
4|sgABCG2_3|ABCG2	GGAAGGCTCTATGATCTCTG	0	0	0	0	0	0	0	0	0	9429	ABCG2	ABCG2	4|sg_hABCG2_03|ABCG2	ABCG2	ACCGGGAAGGCTCTATGATCTCTGGTTTAAGAGCTATGCTGGAAACAGCATAGCAAGTTTAAATAAGGCTAGTCCGTTATCAACTTGAAAAAGTGGCACCGAGTCGGTGCTTTTTT
4|sgABCG2_4|ABCG2	TAACTTAGGATGTCTAAGCA	0	0	0	0	0	0	0	0	0	9429	ABCG2	ABCG2	4|sg_hABCG2_04|ABCG2	ABCG2	ACCGTAACTTAGGATGTCTAAGCAGTTTAAGAGCTATGCTGGAAACAGCATAGCAAGTTTAAATAAGGCTAGTCCGTTATCAACTTGAAAAAGTGGCACCGAGTCGGTGCTTTTTT
4|sgABCG4_1|ABCG4	CTCTGTGTCCCCAGTCATCG	0	0	0	0	0	0	0	0	0	64137	ABCG4	ABCG4	4|sg_hABCG4_01|ABCG4	ABCG4	ACCGCTCTGTGTCCCCAGTCATCGGTTTAAGAGCTATGCTGGAAACAGCATAGCAAGTTTAAATAAGGCTAGTCCGTTATCAACTTGAAAAAGTGGCACCGAGTCGGTGCTTTTTT
4|sgABCG4_2|ABCG4	GGTGGAGAGAACTACCTGGT	0	0	0	0	0	0	0	0	0	64137	ABCG4	ABCG4	4|sg_hABCG4_02|ABCG4	ABCG4	ACCGGGTGGAGAGAACTACCTGGTGTTTAAGAGCTATGCTGGAAACAGCATAGCAAGTTTAAATAAGGCTAGTCCGTTATCAACTTGAAAAAGTGGCACCGAGTCGGTGCTTTTTT
4|sgABCG4_3|ABCG4	GTGGGACATGAACCGTAGGT	0	0	0	0	0	0	0	0	0	64137	ABCG4	ABCG4	4|sg_hABCG4_03|ABCG4	ABCG4	ACCGGTGGGACATGAACCGTAGGTGTTTAAGAGCTATGCTGGAAACAGCATAGCAAGTTTAAATAAGGCTAGTCCGTTATCAACTTGAAAAAGTGGCACCGAGTCGGTGCTTTTTT
4|sgABCG4_4|ABCG4	TGGAGCTGTCCTATTCCGTG	0	0	0	0	0	0	0	0	0	64137	ABCG4	ABCG4	4|sg_hABCG4_04|ABCG4	ABCG4	ACCGTGGAGCTGTCCTATTCCGTGGTTTAAGAGCTATGCTGGAAACAGCATAGCAAGTTTAAATAAGGCTAGTCCGTTATCAACTTGAAAAAGTGGCACCGAGTCGGTGCTTTTTT
4|sgABCG5_1|ABCG5	ACACCTGAAAACGTTACCAA	0	1	13993	0	0	0	0	0	0	64240	ABCG5	ABCG5	4|sg_hABCG5_01|ABCG5	ABCG5	ACCGACACCTGAAAACGTTACCAAGTTTAAGAGCTATGCTGGAAACAGCATAGCAAGTTTAAATAAGGCTAGTCCGTTATCAACTTGAAAAAGTGGCACCGAGTCGGTGCTTTTTT
4|sgABCG5_2|ABCG5	GGCTCGCAGGAACCGAATTG	0	0	0	0	0	0	0	0	0	64240	ABCG5	ABCG5	4|sg_hABCG5_02|ABCG5	ABCG5	ACCGGGCTCGCAGGAACCGAATTGGTTTAAGAGCTATGCTGGAAACAGCATAGCAAGTTTAAATAAGGCTAGTCCGTTATCAACTTGAAAAAGTGGCACCGAGTCGGTGCTTTTTT
4|sgABCG5_3|ABCG5	GGTGCTATCCAGGACCGCGT	0	0	0	0	0	0	0	0	0	64240	ABCG5	ABCG5	4|sg_hABCG5_03|ABCG5	ABCG5	ACCGGGTGCTATCCAGGACCGCGTGTTTAAGAGCTATGCTGGAAACAGCATAGCAAGTTTAAATAAGGCTAGTCCGTTATCAACTTGAAAAAGTGGCACCGAGTCGGTGCTTTTTT
4|sgABCG5_4|ABCG5	TGATTGGCAACTACAGCTTG	0	3	0	53738	2	1	43	1	2	64240	ABCG5	ABCG5	4|sg_hABCG5_04|ABCG5	ABCG5	ACCGTGATTGGCAACTACAGCTTGGTTTAAGAGCTATGCTGGAAACAGCATAGCAAGTTTAAATAAGGCTAGTCCGTTATCAACTTGAAAAAGTGGCACCGAGTCGGTGCTTTTTT
4|sgABCG8_1|ABCG8	CACCCCCATCTACTTAGGGG	0	0	0	0	0	0	0	0	0	64241	ABCG8	ABCG8	4|sg_hABCG8_01|ABCG8	ABCG8	ACCGCACCCCCATCTACTTAGGGGGTTTAAGAGCTATGCTGGAAACAGCATAGCAAGTTTAAATAAGGCTAGTCCGTTATCAACTTGAAAAAGTGGCACCGAGTCGGTGCTTTTTT
4|sgABCG8_2|ABCG8	CAGTGCGCTGACACCCGCGT	0	0	0	0	0	0	0	0	0	64241	ABCG8	ABCG8	4|sg_hABCG8_02|ABCG8	ABCG8	ACCGCAGTGCGCTGACACCCGCGTGTTTAAGAGCTATGCTGGAAACAGCATAGCAAGTTTAAATAAGGCTAGTCCGTTATCAACTTGAAAAAGTGGCACCGAGTCGGTGCTTTTTT
4|sgABCG8_3|ABCG8	CTCAAACCAAGGGACCTGAG	0	0	0	0	0	0	0	0	0	64241	ABCG8	ABCG8	4|sg_hABCG8_03|ABCG8	ABCG8	ACCGCTCAAACCAAGGGACCTGAGGTTTAAGAGCTATGCTGGAAACAGCATAGCAAGTTTAAATAAGGCTAGTCCGTTATCAACTTGAAAAAGTGGCACCGAGTCGGTGCTTTTTT
4|sgABCG8_4|ABCG8	GAGTCCTACGAAGATGCCTG	2	3	2	67	2	2	220780	1	2	64241	ABCG8	ABCG8	4|sg_hABCG8_04|ABCG8	ABCG8	ACCGGAGTCCTACGAAGATGCCTGGTTTAAGAGCTATGCTGGAAACAGCATAGCAAGTTTAAATAAGGCTAGTCCGTTATCAACTTGAAAAAGTGGCACCGAGTCGGTGCTTTTTT
4|sgABHD1_1|ABHD1	AGCCCCTAGTCCTTTATCAG	0	0	0	0	0	0	0	0	0	84696	ABHD1	ABHD1	4|sg_hABHD1_01|ABHD1	ABHD1	ACCGAGCCCCTAGTCCTTTATCAGGTTTAAGAGCTATGCTGGAAACAGCATAGCAAGTTTAAATAAGGCTAGTCCGTTATCAACTTGAAAAAGTGGCACCGAGTCGGTGCTTTTTT
4|sgABHD1_2|ABHD1	GACCCTACCGTTCCACAAGT	0	0	0	0	0	0	0	0	0	84696	ABHD1	ABHD1	4|sg_hABHD1_02|ABHD1	ABHD1	ACCGGACCCTACCGTTCCACAAGTGTTTAAGAGCTATGCTGGAAACAGCATAGCAAGTTTAAATAAGGCTAGTCCGTTATCAACTTGAAAAAGTGGCACCGAGTCGGTGCTTTTTT
4|sgABHD1_3|ABHD1	GCTGTCGTGTTTAACAACCG	0	0	0	0	0	0	0	0	0	84696	ABHD1	ABHD1	4|sg_hABHD1_03|ABHD1	ABHD1	ACCGGCTGTCGTGTTTAACAACCGGTTTAAGAGCTATGCTGGAAACAGCATAGCAAGTTTAAATAAGGCTAGTCCGTTATCAACTTGAAAAAGTGGCACCGAGTCGGTGCTTTTTT
4|sgABHD1_4|ABHD1	GGTGCAAGACGTATGTCTCC	0	0	0	0	0	0	0	0	0	84696	ABHD1	ABHD1	4|sg_hABHD1_04|ABHD1	ABHD1	ACCGGGTGCAAGACGTATGTCTCCGTTTAAGAGCTATGCTGGAAACAGCATAGCAAGTTTAAATAAGGCTAGTCCGTTATCAACTTGAAAAAGTGGCACCGAGTCGGTGCTTTTTT
4|sgABHD10_1|ABHD10	TAATTGATGACTTAGCTGAT	0	0	0	0	0	0	0	0	0	55347	ABHD10	ABHD10	4|sg_hABHD10_01|ABHD10	ABHD10	ACCGTAATTGATGACTTAGCTGATGTTTAAGAGCTATGCTGGAAACAGCATAGCAAGTTTAAATAAGGCTAGTCCGTTATCAACTTGAAAAAGTGGCACCGAGTCGGTGCTTTTTT
4|sgABHD10_2|ABHD10	TACCTCAGCGGGCGCCACGG	0	0	0	0	0	0	0	0	0	55347	ABHD10	ABHD10	4|sg_hABHD10_02|ABHD10	ABHD10	ACCGTACCTCAGCGGGCGCCACGGGTTTAAGAGCTATGCTGGAAACAGCATAGCAAGTTTAAATAAGGCTAGTCCGTTATCAACTTGAAAAAGTGGCACCGAGTCGGTGCTTTTTT
4|sgABHD10_3|ABHD10	TCATATAAGAAAGATAGCCA	0	0	0	0	0	0	0	0	0	55347	ABHD10	ABHD10	4|sg_hABHD10_03|ABHD10	ABHD10	ACCGTCATATAAGAAAGATAGCCAGTTTAAGAGCTATGCTGGAAACAGCATAGCAAGTTTAAATAAGGCTAGTCCGTTATCAACTTGAAAAAGTGGCACCGAGTCGGTGCTTTTTT
4|sgABHD10_4|ABHD10	TGCACGACCAGAGAAGGTCG	0	0	0	0	0	0	0	0	0	55347	ABHD10	ABHD10	4|sg_hABHD10_04|ABHD10	ABHD10	ACCGTGCACGACCAGAGAAGGTCGGTTTAAGAGCTATGCTGGAAACAGCATAGCAAGTTTAAATAAGGCTAGTCCGTTATCAACTTGAAAAAGTGGCACCGAGTCGGTGCTTTTTT
4|sgABHD11_1|ABHD11	ACGGTGGATGCTCGTAACCA	0	0	0	0	0	0	0	0	0	83451	ABHD11	ABHD11	4|sg_hABHD11_01|ABHD11	ABHD11	ACCGACGGTGGATGCTCGTAACCAGTTTAAGAGCTATGCTGGAAACAGCATAGCAAGTTTAAATAAGGCTAGTCCGTTATCAACTTGAAAAAGTGGCACCGAGTCGGTGCTTTTTT
4|sgABHD11_2|ABHD11	CTGCCACATAGGTTGCAAAG	0	0	0	0	0	0	0	0	0	83451	ABHD11	ABHD11	4|sg_hABHD11_02|ABHD11	ABHD11	ACCGCTGCCACATAGGTTGCAAAGGTTTAAGAGCTATGCTGGAAACAGCATAGCAAGTTTAAATAAGGCTAGTCCGTTATCAACTTGAAAAAGTGGCACCGAGTCGGTGCTTTTTT
4|sgABHD11_3|ABHD11	GAGCCCGTGCAAAAAGACGA	0	0	0	0	0	0	0	0	0	83451	ABHD11	ABHD11	4|sg_hABHD11_03|ABHD11	ABHD11	ACCGGAGCCCGTGCAAAAAGACGAGTTTAAGAGCTATGCTGGAAACAGCATAGCAAGTTTAAATAAGGCTAGTCCGTTATCAACTTGAAAAAGTGGCACCGAGTCGGTGCTTTTTT
4|sgABHD11_4|ABHD11	GCTGTGGCCAACGACGACGC	0	0	0	0	0	0	0	0	0	83451	ABHD11	ABHD11	4|sg_hABHD11_04|ABHD11	ABHD11	ACCGGCTGTGGCCAACGACGACGCGTTTAAGAGCTATGCTGGAAACAGCATAGCAAGTTTAAATAAGGCTAGTCCGTTATCAACTTGAAAAAGTGGCACCGAGTCGGTGCTTTTTT
4|sgABHD12_1|ABHD12	AGGTGACCACATGGTAACCA	0	0	0	0	0	0	0	4987	0	26090	ABHD12	ABHD12	4|sg_hABHD12_01|ABHD12	ABHD12	ACCGAGGTGACCACATGGTAACCAGTTTAAGAGCTATGCTGGAAACAGCATAGCAAGTTTAAATAAGGCTAGTCCGTTATCAACTTGAAAAAGTGGCACCGAGTCGGTGCTTTTTT
4|sgABHD12_2|ABHD12	CCTACGCCTGACGGGCCCGG	0	0	0	0	0	0	0	0	0	26090	ABHD12	ABHD12	4|sg_hABHD12_02|ABHD12	ABHD12	ACCGCCTACGCCTGACGGGCCCGGGTTTAAGAGCTATGCTGGAAACAGCATAGCAAGTTTAAATAAGGCTAGTCCGTTATCAACTTGAAAAAGTGGCACCGAGTCGGTGCTTTTTT
4|sgABHD12_3|ABHD12	GAGTGGCCCCAGATGTACAC	0	0	0	0	0	0	0	0	0	26090	ABHD12	ABHD12	4|sg_hABHD12_03|ABHD12	ABHD12	ACCGGAGTGGCCCCAGATGTACACGTTTAAGAGCTATGCTGGAAACAGCATAGCAAGTTTAAATAAGGCTAGTCCGTTATCAACTTGAAAAAGTGGCACCGAGTCGGTGCTTTTTT
4|sgABHD12_4|ABHD12	GCAGGTACAGAATGATAGGG	0	0	0	0	0	0	0	0	0	26090	ABHD12	ABHD12	4|sg_hABHD12_04|ABHD12	ABHD12	ACCGGCAGGTACAGAATGATAGGGGTTTAAGAGCTATGCTGGAAACAGCATAGCAAGTTTAAATAAGGCTAGTCCGTTATCAACTTGAAAAAGTGGCACCGAGTCGGTGCTTTTTT
4|sgABHD12B_1|ABHD12B	CCAAGACAATAGCATCAACT	0	0	0	0	0	0	0	0	0	145447	ABHD12B	ABHD12B	4|sg_hABHD12B_01|ABHD12B	ABHD12B	ACCGCCAAGACAATAGCATCAACTGTTTAAGAGCTATGCTGGAAACAGCATAGCAAGTTTAAATAAGGCTAGTCCGTTATCAACTTGAAAAAGTGGCACCGAGTCGGTGCTTTTTT
4|sgABHD12B_2|ABHD12B	GTCTTGTCTGTTGACTACAG	0	0	0	0	0	0	0	0	0	145447	ABHD12B	ABHD12B	4|sg_hABHD12B_02|ABHD12B	ABHD12B	ACCGGTCTTGTCTGTTGACTACAGGTTTAAGAGCTATGCTGGAAACAGCATAGCAAGTTTAAATAAGGCTAGTCCGTTATCAACTTGAAAAAGTGGCACCGAGTCGGTGCTTTTTT
4|sgABHD12B_3|ABHD12B	TAATTGGGTTCCCATCACGA	0	0	0	0	0	0	0	0	0	145447	ABHD12B	ABHD12B	4|sg_hABHD12B_03|ABHD12B	ABHD12B	ACCGTAATTGGGTTCCCATCACGAGTTTAAGAGCTATGCTGGAAACAGCATAGCAAGTTTAAATAAGGCTAGTCCGTTATCAACTTGAAAAAGTGGCACCGAGTCGGTGCTTTTTT
4|sgABHD12B_4|ABHD12B	TTGTGTCTATGAGTGGACCA	0	0	0	0	0	0	0	0	0	145447	ABHD12B	ABHD12B	4|sg_hABHD12B_04|ABHD12B	ABHD12B	ACCGTTGTGTCTATGAGTGGACCAGTTTAAGAGCTATGCTGGAAACAGCATAGCAAGTTTAAATAAGGCTAGTCCGTTATCAACTTGAAAAAGTGGCACCGAGTCGGTGCTTTTTT
4|sgABHD13_1|ABHD13	AATAGCCACTGCTCCACCCA	0	0	0	0	0	0	0	0	0	84945	ABHD13	ABHD13	4|sg_hABHD13_01|ABHD13	ABHD13	ACCGAATAGCCACTGCTCCACCCAGTTTAAGAGCTATGCTGGAAACAGCATAGCAAGTTTAAATAAGGCTAGTCCGTTATCAACTTGAAAAAGTGGCACCGAGTCGGTGCTTTTTT
4|sgABHD13_2|ABHD13	CATGGGAATGCAGGCAACAT	0	0	0	0	0	0	0	0	1	84945	ABHD13	ABHD13	4|sg_hABHD13_02|ABHD13	ABHD13	ACCGCATGGGAATGCAGGCAACATGTTTAAGAGCTATGCTGGAAACAGCATAGCAAGTTTAAATAAGGCTAGTCCGTTATCAACTTGAAAAAGTGGCACCGAGTCGGTGCTTTTTT
4|sgABHD13_3|ABHD13	GGGAACATAAAGACGTGAAG	0	0	0	0	0	0	0	0	0	84945	ABHD13	ABHD13	4|sg_hABHD13_03|ABHD13	ABHD13	ACCGGGGAACATAAAGACGTGAAGGTTTAAGAGCTATGCTGGAAACAGCATAGCAAGTTTAAATAAGGCTAGTCCGTTATCAACTTGAAAAAGTGGCACCGAGTCGGTGCTTTTTT
4|sgABHD13_4|ABHD13	TAGGATTTCAGCCATTATGG	0	0	0	0	0	0	0	0	0	84945	ABHD13	ABHD13	4|sg_hABHD13_04|ABHD13	ABHD13	ACCGTAGGATTTCAGCCATTATGGGTTTAAGAGCTATGCTGGAAACAGCATAGCAAGTTTAAATAAGGCTAGTCCGTTATCAACTTGAAAAAGTGGCACCGAGTCGGTGCTTTTTT
4|sgABHD14A_1|ABHD14A	AGGCCTTTAACTCTCACACG	0	0	0	0	0	0	0	0	0	25864	ABHD14A	ABHD14A	4|sg_hABHD14A_01|ABHD14A	ABHD14A	ACCGAGGCCTTTAACTCTCACACGGTTTAAGAGCTATGCTGGAAACAGCATAGCAAGTTTAAATAAGGCTAGTCCGTTATCAACTTGAAAAAGTGGCACCGAGTCGGTGCTTTTTT
4|sgABHD14A_2|ABHD14A	CTGGCAGCCCCACATACAGT	0	0	0	0	0	0	0	0	1	25864	ABHD14A	ABHD14A	4|sg_hABHD14A_02|ABHD14A	ABHD14A	ACCGCTGGCAGCCCCACATACAGTGTTTAAGAGCTATGCTGGAAACAGCATAGCAAGTTTAAATAAGGCTAGTCCGTTATCAACTTGAAAAAGTGGCACCGAGTCGGTGCTTTTTT
4|sgABHD14A_3|ABHD14A	GGAGGTACAGAATGCCGTGT	0	0	0	0	0	1	0	3962	0	25864	ABHD14A	ABHD14A	4|sg_hABHD14A_03|ABHD14A	ABHD14A	ACCGGGAGGTACAGAATGCCGTGTGTTTAAGAGCTATGCTGGAAACAGCATAGCAAGTTTAAATAAGGCTAGTCCGTTATCAACTTGAAAAAGTGGCACCGAGTCGGTGCTTTTTT
4|sgABHD14A_4|ABHD14A	TCCCACTCAACCAGGCACAC	0	0	0	0	0	0	0	4438	0	25864	ABHD14A	ABHD14A	4|sg_hABHD14A_04|ABHD14A	ABHD14A	ACCGTCCCACTCAACCAGGCACACGTTTAAGAGCTATGCTGGAAACAGCATAGCAAGTTTAAATAAGGCTAGTCCGTTATCAACTTGAAAAAGTGGCACCGAGTCGGTGCTTTTTT
4|sgABHD14B_1|ABHD14B	AGAACCTGGGTACACTGCAC	2	5	1	4	1	124804	4	7	2	84836	ABHD14B	ABHD14B	4|sg_hABHD14B_01|ABHD14B	ABHD14B	ACCGAGAACCTGGGTACACTGCACGTTTAAGAGCTATGCTGGAAACAGCATAGCAAGTTTAAATAAGGCTAGTCCGTTATCAACTTGAAAAAGTGGCACCGAGTCGGTGCTTTTTT
4|sgABHD14B_2|ABHD14B	GAGAGGCCCTGCCCGGCAGT	0	0	0	0	0	0	0	0	0	84836	ABHD14B	ABHD14B	4|sg_hABHD14B_02|ABHD14B	ABHD14B	ACCGGAGAGGCCCTGCCCGGCAGTGTTTAAGAGCTATGCTGGAAACAGCATAGCAAGTTTAAATAAGGCTAGTCCGTTATCAACTTGAAAAAGTGGCACCGAGTCGGTGCTTTTTT
4|sgABHD14B_3|ABHD14B	TGATGGACTGATCACAACCG	0	0	1	0	0	0	0	0	0	84836	ABHD14B	ABHD14B	4|sg_hABHD14B_03|ABHD14B	ABHD14B	ACCGTGATGGACTGATCACAACCGGTTTAAGAGCTATGCTGGAAACAGCATAGCAAGTTTAAATAAGGCTAGTCCGTTATCAACTTGAAAAAGTGGCACCGAGTCGGTGCTTTTTT
4|sgABHD14B_4|ABHD14B	TGCAGGTCTGGGGCACTCCA	0	0	0	0	0	2	0	6665	0	84836	ABHD14B	ABHD14B	4|sg_hABHD14B_04|ABHD14B	ABHD14B	ACCGTGCAGGTCTGGGGCACTCCAGTTTAAGAGCTATGCTGGAAACAGCATAGCAAGTTTAAATAAGGCTAGTCCGTTATCAACTTGAAAAAGTGGCACCGAGTCGGTGCTTTTTT
4|sgABHD15_1|ABHD15	CAAACAAGGCTGCACCCTCC	0	0	0	0	0	0	0	0	0	116236	ABHD15	ABHD15	4|sg_hABHD15_01|ABHD15	ABHD15	ACCGCAAACAAGGCTGCACCCTCCGTTTAAGAGCTATGCTGGAAACAGCATAGCAAGTTTAAATAAGGCTAGTCCGTTATCAACTTGAAAAAGTGGCACCGAGTCGGTGCTTTTTT
4|sgABHD15_2|ABHD15	CTGGTGATCCCCAATGCGTG	0	0	0	10236	1	0	10	0	0	116236	ABHD15	ABHD15	4|sg_hABHD15_02|ABHD15	ABHD15	ACCGCTGGTGATCCCCAATGCGTGGTTTAAGAGCTATGCTGGAAACAGCATAGCAAGTTTAAATAAGGCTAGTCCGTTATCAACTTGAAAAAGTGGCACCGAGTCGGTGCTTTTTT
4|sgABHD15_3|ABHD15	GGCCGGCCTCGAACCACTCT	0	0	0	0	0	0	0	0	0	116236	ABHD15	ABHD15	4|sg_hABHD15_03|ABHD15	ABHD15	ACCGGGCCGGCCTCGAACCACTCTGTTTAAGAGCTATGCTGGAAACAGCATAGCAAGTTTAAATAAGGCTAGTCCGTTATCAACTTGAAAAAGTGGCACCGAGTCGGTGCTTTTTT
4|sgABHD15_4|ABHD15	TGTATGTGACCGCCTCCTTG	0	0	0	0	0	0	0	0	0	116236	ABHD15	ABHD15	4|sg_hABHD15_04|ABHD15	ABHD15	ACCGTGTATGTGACCGCCTCCTTGGTTTAAGAGCTATGCTGGAAACAGCATAGCAAGTTTAAATAAGGCTAGTCCGTTATCAACTTGAAAAAGTGGCACCGAGTCGGTGCTTTTTT
4|sgABHD16A_1|ABHD16A	ACCATGTTTGTGGACCGGCG	0	0	0	0	0	0	0	0	0	7920	ABHD16A	ABHD16A	4|sg_hABHD16A_01|ABHD16A	ABHD16A	ACCGACCATGTTTGTGGACCGGCGGTTTAAGAGCTATGCTGGAAACAGCATAGCAAGTTTAAATAAGGCTAGTCCGTTATCAACTTGAAAAAGTGGCACCGAGTCGGTGCTTTTTT
4|sgABHD16A_2|ABHD16A	ATCTACGCCTGGTCCATCGG	0	1	0	0	46216	0	0	0	0	7920	ABHD16A	ABHD16A	4|sg_hABHD16A_02|ABHD16A	ABHD16A	ACCGATCTACGCCTGGTCCATCGGGTTTAAGAGCTATGCTGGAAACAGCATAGCAAGTTTAAATAAGGCTAGTCCGTTATCAACTTGAAAAAGTGGCACCGAGTCGGTGCTTTTTT
4|sgABHD16A_3|ABHD16A	CCATCTTGGAAGCAACACAT	1	0	5428	0	0	0	1	16135	0	7920	ABHD16A	ABHD16A	4|sg_hABHD16A_03|ABHD16A	ABHD16A	ACCGCCATCTTGGAAGCAACACATGTTTAAGAGCTATGCTGGAAACAGCATAGCAAGTTTAAATAAGGCTAGTCCGTTATCAACTTGAAAAAGTGGCACCGAGTCGGTGCTTTTTT
4|sgABHD16A_4|ABHD16A	CTCAGGAAGGAGTCTCGAGG	0	0	0	0	0	0	0	0	0	7920	ABHD16A	ABHD16A	4|sg_hABHD16A_04|ABHD16A	ABHD16A	ACCGCTCAGGAAGGAGTCTCGAGGGTTTAAGAGCTATGCTGGAAACAGCATAGCAAGTTTAAATAAGGCTAGTCCGTTATCAACTTGAAAAAGTGGCACCGAGTCGGTGCTTTTTT
4|sgABHD16B_1|ABHD16B	CAGACCAGCCGTAGACCACC	0	0	0	0	0	0	0	0	0	140701	ABHD16B	ABHD16B	4|sg_hABHD16B_01|ABHD16B	ABHD16B	ACCGCAGACCAGCCGTAGACCACCGTTTAAGAGCTATGCTGGAAACAGCATAGCAAGTTTAAATAAGGCTAGTCCGTTATCAACTTGAAAAAGTGGCACCGAGTCGGTGCTTTTTT
4|sgABHD16B_2|ABHD16B	CATCTGCTGCGAAGGCAACG	0	0	0	0	0	0	0	0	0	140701	ABHD16B	ABHD16B	4|sg_hABHD16B_02|ABHD16B	ABHD16B	ACCGCATCTGCTGCGAAGGCAACGGTTTAAGAGCTATGCTGGAAACAGCATAGCAAGTTTAAATAAGGCTAGTCCGTTATCAACTTGAAAAAGTGGCACCGAGTCGGTGCTTTTTT
4|sgABHD16B_3|ABHD16B	GCGCACGTCATCCCAGCGGA	0	0	0	0	0	0	0	0	0	140701	ABHD16B	ABHD16B	4|sg_hABHD16B_03|ABHD16B	ABHD16B	ACCGGCGCACGTCATCCCAGCGGAGTTTAAGAGCTATGCTGGAAACAGCATAGCAAGTTTAAATAAGGCTAGTCCGTTATCAACTTGAAAAAGTGGCACCGAGTCGGTGCTTTTTT
4|sgABHD16B_4|ABHD16B	GGCCGCTGGCTCGTGTACCC	0	0	0	0	0	0	0	0	0	140701	ABHD16B	ABHD16B	4|sg_hABHD16B_04|ABHD16B	ABHD16B	ACCGGGCCGCTGGCTCGTGTACCCGTTTAAGAGCTATGCTGGAAACAGCATAGCAAGTTTAAATAAGGCTAGTCCGTTATCAACTTGAAAAAGTGGCACCGAGTCGGTGCTTTTTT
4|sgABHD17A_1|ABHD17A	ACCGTAGCCGGAGTAGTCGT	1	0	1	33620	1	1	24	0	1	81926	ABHD17A	ABHD17A	4|sg_hABHD17A_01|ABHD17A	ABHD17A	ACCGACCGTAGCCGGAGTAGTCGTGTTTAAGAGCTATGCTGGAAACAGCATAGCAAGTTTAAATAAGGCTAGTCCGTTATCAACTTGAAAAAGTGGCACCGAGTCGGTGCTTTTTT
4|sgABHD17A_2|ABHD17A	AGGCTCTCAGGGTCCCCAAG	0	0	0	0	0	0	0	0	0	81926	ABHD17A	ABHD17A	4|sg_hABHD17A_02|ABHD17A	ABHD17A	ACCGAGGCTCTCAGGGTCCCCAAGGTTTAAGAGCTATGCTGGAAACAGCATAGCAAGTTTAAATAAGGCTAGTCCGTTATCAACTTGAAAAAGTGGCACCGAGTCGGTGCTTTTTT
4|sgABHD17A_3|ABHD17A	GCGCGAGCTGGACACCATCG	0	0	0	0	0	0	0	0	0	81926	ABHD17A	ABHD17A	4|sg_hABHD17A_03|ABHD17A	ABHD17A	ACCGGCGCGAGCTGGACACCATCGGTTTAAGAGCTATGCTGGAAACAGCATAGCAAGTTTAAATAAGGCTAGTCCGTTATCAACTTGAAAAAGTGGCACCGAGTCGGTGCTTTTTT
4|sgABHD17A_4|ABHD17A	TACACGGTCCTCTTCTCGCA	0	0	0	0	0	0	0	0	0	81926	ABHD17A	ABHD17A	4|sg_hABHD17A_04|ABHD17A	ABHD17A	ACCGTACACGGTCCTCTTCTCGCAGTTTAAGAGCTATGCTGGAAACAGCATAGCAAGTTTAAATAAGGCTAGTCCGTTATCAACTTGAAAAAGTGGCACCGAGTCGGTGCTTTTTT
4|sgABHD17B_1|ABHD17B	CTTGGCTTGCTCTTAGGACA	0	0	0	0	0	0	0	0	0	51104	ABHD17B	ABHD17B	4|sg_hABHD17B_01|ABHD17B	ABHD17B	ACCGCTTGGCTTGCTCTTAGGACAGTTTAAGAGCTATGCTGGAAACAGCATAGCAAGTTTAAATAAGGCTAGTCCGTTATCAACTTGAAAAAGTGGCACCGAGTCGGTGCTTTTTT
4|sgABHD17B_2|ABHD17B	GAGTAAAGTGTATTTCGCAT	0	0	0	0	0	0	0	0	0	51104	ABHD17B	ABHD17B	4|sg_hABHD17B_02|ABHD17B	ABHD17B	ACCGGAGTAAAGTGTATTTCGCATGTTTAAGAGCTATGCTGGAAACAGCATAGCAAGTTTAAATAAGGCTAGTCCGTTATCAACTTGAAAAAGTGGCACCGAGTCGGTGCTTTTTT
4|sgABHD17B_3|ABHD17B	TATAGGGACAGTACCGTCTG	0	0	0	0	0	0	0	0	0	51104	ABHD17B	ABHD17B	4|sg_hABHD17B_03|ABHD17B	ABHD17B	ACCGTATAGGGACAGTACCGTCTGGTTTAAGAGCTATGCTGGAAACAGCATAGCAAGTTTAAATAAGGCTAGTCCGTTATCAACTTGAAAAAGTGGCACCGAGTCGGTGCTTTTTT
4|sgABHD17B_4|ABHD17B	TTCATGACTAGAACCAGTAA	27656	0	1	0	0	0	0	3	0	51104	ABHD17B	ABHD17B	4|sg_hABHD17B_04|ABHD17B	ABHD17B	ACCGTTCATGACTAGAACCAGTAAGTTTAAGAGCTATGCTGGAAACAGCATAGCAAGTTTAAATAAGGCTAGTCCGTTATCAACTTGAAAAAGTGGCACCGAGTCGGTGCTTTTTT
4|sgABHD17C_1|ABHD17C	ACGCCGACATCGACGCCGCG	0	0	0	0	0	0	0	0	0	58489	ABHD17C	ABHD17C	4|sg_hABHD17C_01|ABHD17C	ABHD17C	ACCGACGCCGACATCGACGCCGCGGTTTAAGAGCTATGCTGGAAACAGCATAGCAAGTTTAAATAAGGCTAGTCCGTTATCAACTTGAAAAAGTGGCACCGAGTCGGTGCTTTTTT
4|sgABHD17C_2|ABHD17C	GCCGTATCCCGAGTAGTCGT	0	0	0	0	0	0	0	0	0	58489	ABHD17C	ABHD17C	4|sg_hABHD17C_02|ABHD17C	ABHD17C	ACCGGCCGTATCCCGAGTAGTCGTGTTTAAGAGCTATGCTGGAAACAGCATAGCAAGTTTAAATAAGGCTAGTCCGTTATCAACTTGAAAAAGTGGCACCGAGTCGGTGCTTTTTT
4|sgABHD17C_3|ABHD17C	GCGCGAGAAGAAGACCTCGA	0	0	0	0	0	0	0	0	0	58489	ABHD17C	ABHD17C	4|sg_hABHD17C_03|ABHD17C	ABHD17C	ACCGGCGCGAGAAGAAGACCTCGAGTTTAAGAGCTATGCTGGAAACAGCATAGCAAGTTTAAATAAGGCTAGTCCGTTATCAACTTGAAAAAGTGGCACCGAGTCGGTGCTTTTTT
4|sgABHD17C_4|ABHD17C	TCCCAATGCTCTGACCATAG	0	0	0	0	0	0	0	0	0	58489	ABHD17C	ABHD17C	4|sg_hABHD17C_04|ABHD17C	ABHD17C	ACCGTCCCAATGCTCTGACCATAGGTTTAAGAGCTATGCTGGAAACAGCATAGCAAGTTTAAATAAGGCTAGTCCGTTATCAACTTGAAAAAGTGGCACCGAGTCGGTGCTTTTTT
4|sgABHD2_1|ABHD2	AGGTGACCTACCTGTGCGAG	0	0	2	66966	2	1	46	4756	0	11057	ABHD2	ABHD2	4|sg_hABHD2_01|ABHD2	ABHD2	ACCGAGGTGACCTACCTGTGCGAGGTTTAAGAGCTATGCTGGAAACAGCATAGCAAGTTTAAATAAGGCTAGTCCGTTATCAACTTGAAAAAGTGGCACCGAGTCGGTGCTTTTTT
4|sgABHD2_2|ABHD2	GCTCAGCCAAGGGCTCGAAG	0	0	0	0	0	0	0	0	0	11057	ABHD2	ABHD2	4|sg_hABHD2_02|ABHD2	ABHD2	ACCGGCTCAGCCAAGGGCTCGAAGGTTTAAGAGCTATGCTGGAAACAGCATAGCAAGTTTAAATAAGGCTAGTCCGTTATCAACTTGAAAAAGTGGCACCGAGTCGGTGCTTTTTT
4|sgABHD2_3|ABHD2	GGGCGTAGTCAACGAAAGTG	0	0	0	0	0	0	0	0	0	11057	ABHD2	ABHD2	4|sg_hABHD2_03|ABHD2	ABHD2	ACCGGGGCGTAGTCAACGAAAGTGGTTTAAGAGCTATGCTGGAAACAGCATAGCAAGTTTAAATAAGGCTAGTCCGTTATCAACTTGAAAAAGTGGCACCGAGTCGGTGCTTTTTT
4|sgABHD2_4|ABHD2	TTTGCCCACAGGCTGCACGT	0	0	0	0	0	0	0	0	0	11057	ABHD2	ABHD2	4|sg_hABHD2_04|ABHD2	ABHD2	ACCGTTTGCCCACAGGCTGCACGTGTTTAAGAGCTATGCTGGAAACAGCATAGCAAGTTTAAATAAGGCTAGTCCGTTATCAACTTGAAAAAGTGGCACCGAGTCGGTGCTTTTTT
4|sgABHD3_1|ABHD3	ACTCCTTGCTTGTTCCCGTG	0	0	0	0	0	0	0	0	0	171586	ABHD3	ABHD3	4|sg_hABHD3_01|ABHD3	ABHD3	ACCGACTCCTTGCTTGTTCCCGTGGTTTAAGAGCTATGCTGGAAACAGCATAGCAAGTTTAAATAAGGCTAGTCCGTTATCAACTTGAAAAAGTGGCACCGAGTCGGTGCTTTTTT
4|sgABHD3_2|ABHD3	GGGGGCTTCGAAGTGATGAA	0	0	0	0	0	0	0	0	0	171586	ABHD3	ABHD3	4|sg_hABHD3_02|ABHD3	ABHD3	ACCGGGGGGCTTCGAAGTGATGAAGTTTAAGAGCTATGCTGGAAACAGCATAGCAAGTTTAAATAAGGCTAGTCCGTTATCAACTTGAAAAAGTGGCACCGAGTCGGTGCTTTTTT
4|sgABHD3_3|ABHD3	GTCACTACTTCCAGACGCCA	0	0	0	0	0	0	0	0	0	171586	ABHD3	ABHD3	4|sg_hABHD3_03|ABHD3	ABHD3	ACCGGTCACTACTTCCAGACGCCAGTTTAAGAGCTATGCTGGAAACAGCATAGCAAGTTTAAATAAGGCTAGTCCGTTATCAACTTGAAAAAGTGGCACCGAGTCGGTGCTTTTTT
4|sgABHD3_4|ABHD3	TAGTACGTTTCTGTAACCAC	0	0	0	0	0	0	0	0	0	171586	ABHD3	ABHD3	4|sg_hABHD3_04|ABHD3	ABHD3	ACCGTAGTACGTTTCTGTAACCACGTTTAAGAGCTATGCTGGAAACAGCATAGCAAGTTTAAATAAGGCTAGTCCGTTATCAACTTGAAAAAGTGGCACCGAGTCGGTGCTTTTTT
4|sgABHD4_1|ABHD4	GACATCGATAGAGACATGGC	0	0	0	0	0	0	0	0	0	63874	ABHD4	ABHD4	4|sg_hABHD4_01|ABHD4	ABHD4	ACCGGACATCGATAGAGACATGGCGTTTAAGAGCTATGCTGGAAACAGCATAGCAAGTTTAAATAAGGCTAGTCCGTTATCAACTTGAAAAAGTGGCACCGAGTCGGTGCTTTTTT
4|sgABHD4_2|ABHD4	GCTACTCGAAGAACAGCCAA	0	0	0	0	0	0	0	0	0	63874	ABHD4	ABHD4	4|sg_hABHD4_02|ABHD4	ABHD4	ACCGGCTACTCGAAGAACAGCCAAGTTTAAGAGCTATGCTGGAAACAGCATAGCAAGTTTAAATAAGGCTAGTCCGTTATCAACTTGAAAAAGTGGCACCGAGTCGGTGCTTTTTT
4|sgABHD4_3|ABHD4	GGAGGGATACATATCTGGCC	0	0	0	0	0	0	0	0	0	63874	ABHD4	ABHD4	4|sg_hABHD4_03|ABHD4	ABHD4	ACCGGGAGGGATACATATCTGGCCGTTTAAGAGCTATGCTGGAAACAGCATAGCAAGTTTAAATAAGGCTAGTCCGTTATCAACTTGAAAAAGTGGCACCGAGTCGGTGCTTTTTT
4|sgABHD4_4|ABHD4	GGGGTGCACGGATCTCACTG	0	0	0	0	0	0	0	0	0	63874	ABHD4	ABHD4	4|sg_hABHD4_04|ABHD4	ABHD4	ACCGGGGGTGCACGGATCTCACTGGTTTAAGAGCTATGCTGGAAACAGCATAGCAAGTTTAAATAAGGCTAGTCCGTTATCAACTTGAAAAAGTGGCACCGAGTCGGTGCTTTTTT
4|sgABHD5_1|ABHD5	GGTCGTTCAGGGAAACCCCA	0	0	0	0	0	0	0	0	0	51099	ABHD5	ABHD5	4|sg_hABHD5_01|ABHD5	ABHD5	ACCGGGTCGTTCAGGGAAACCCCAGTTTAAGAGCTATGCTGGAAACAGCATAGCAAGTTTAAATAAGGCTAGTCCGTTATCAACTTGAAAAAGTGGCACCGAGTCGGTGCTTTTTT
4|sgABHD5_2|ABHD5	GTGGAGATGTGCCCTAGGAT	0	0	0	0	0	0	0	0	0	51099	ABHD5	ABHD5	4|sg_hABHD5_02|ABHD5	ABHD5	ACCGGTGGAGATGTGCCCTAGGATGTTTAAGAGCTATGCTGGAAACAGCATAGCAAGTTTAAATAAGGCTAGTCCGTTATCAACTTGAAAAAGTGGCACCGAGTCGGTGCTTTTTT
4|sgABHD5_3|ABHD5	TAAGGTGTGATATAGACGTA	0	0	0	0	0	0	0	0	0	51099	ABHD5	ABHD5	4|sg_hABHD5_03|ABHD5	ABHD5	ACCGTAAGGTGTGATATAGACGTAGTTTAAGAGCTATGCTGGAAACAGCATAGCAAGTTTAAATAAGGCTAGTCCGTTATCAACTTGAAAAAGTGGCACCGAGTCGGTGCTTTTTT
4|sgABHD5_4|ABHD5	TTGGACGAAGTAGTAGACCC	0	0	0	0	0	0	0	0	0	51099	ABHD5	ABHD5	4|sg_hABHD5_04|ABHD5	ABHD5	ACCGTTGGACGAAGTAGTAGACCCGTTTAAGAGCTATGCTGGAAACAGCATAGCAAGTTTAAATAAGGCTAGTCCGTTATCAACTTGAAAAAGTGGCACCGAGTCGGTGCTTTTTT
4|sgABHD6_1|ABHD6	AGTCTTCATGGTGAACATAG	0	0	0	0	0	0	0	0	0	57406	ABHD6	ABHD6	4|sg_hABHD6_01|ABHD6	ABHD6	ACCGAGTCTTCATGGTGAACATAGGTTTAAGAGCTATGCTGGAAACAGCATAGCAAGTTTAAATAAGGCTAGTCCGTTATCAACTTGAAAAAGTGGCACCGAGTCGGTGCTTTTTT
4|sgABHD6_2|ABHD6	CAAGGATATGTGGCTCAGTG	0	0	0	0	0	0	0	0	1	57406	ABHD6	ABHD6	4|sg_hABHD6_02|ABHD6	ABHD6	ACCGCAAGGATATGTGGCTCAGTGGTTTAAGAGCTATGCTGGAAACAGCATAGCAAGTTTAAATAAGGCTAGTCCGTTATCAACTTGAAAAAGTGGCACCGAGTCGGTGCTTTTTT
4|sgABHD6_3|ABHD6	CTGACAATCAATTTGTACAA	0	0	0	0	0	0	0	0	0	57406	ABHD6	ABHD6	4|sg_hABHD6_03|ABHD6	ABHD6	ACCGCTGACAATCAATTTGTACAAGTTTAAGAGCTATGCTGGAAACAGCATAGCAAGTTTAAATAAGGCTAGTCCGTTATCAACTTGAAAAAGTGGCACCGAGTCGGTGCTTTTTT
4|sgABHD6_4|ABHD6	GCAAGTTAAGAGGATACACC	0	0	0	0	0	0	0	0	0	57406	ABHD6	ABHD6	4|sg_hABHD6_04|ABHD6	ABHD6	ACCGGCAAGTTAAGAGGATACACCGTTTAAGAGCTATGCTGGAAACAGCATAGCAAGTTTAAATAAGGCTAGTCCGTTATCAACTTGAAAAAGTGGCACCGAGTCGGTGCTTTTTT
4|sgABHD8_1|ABHD8	GATGAAAAAGAGCACCACGT	0	0	0	0	0	0	0	0	0	79575	ABHD8	ABHD8	4|sg_hABHD8_01|ABHD8	ABHD8	ACCGGATGAAAAAGAGCACCACGTGTTTAAGAGCTATGCTGGAAACAGCATAGCAAGTTTAAATAAGGCTAGTCCGTTATCAACTTGAAAAAGTGGCACCGAGTCGGTGCTTTTTT
4|sgABHD8_2|ABHD8	GCCGGGCTTGACCTCTACAA	0	0	0	0	0	0	0	0	0	79575	ABHD8	ABHD8	4|sg_hABHD8_02|ABHD8	ABHD8	ACCGGCCGGGCTTGACCTCTACAAGTTTAAGAGCTATGCTGGAAACAGCATAGCAAGTTTAAATAAGGCTAGTCCGTTATCAACTTGAAAAAGTGGCACCGAGTCGGTGCTTTTTT
4|sgABHD8_3|ABHD8	GTACCCAGACCTAGTGCACA	0	0	0	0	0	0	0	0	0	79575	ABHD8	ABHD8	4|sg_hABHD8_03|ABHD8	ABHD8	ACCGGTACCCAGACCTAGTGCACAGTTTAAGAGCTATGCTGGAAACAGCATAGCAAGTTTAAATAAGGCTAGTCCGTTATCAACTTGAAAAAGTGGCACCGAGTCGGTGCTTTTTT
4|sgABHD8_4|ABHD8	TCACCGTGTACCGCAATGGG	0	0	0	0	0	0	0	0	0	79575	ABHD8	ABHD8	4|sg_hABHD8_04|ABHD8	ABHD8	ACCGTCACCGTGTACCGCAATGGGGTTTAAGAGCTATGCTGGAAACAGCATAGCAAGTTTAAATAAGGCTAGTCCGTTATCAACTTGAAAAAGTGGCACCGAGTCGGTGCTTTTTT
4|sgABI1_1|ABI1	GAGTTACCAGAACCTGACTC	0	0	0	0	0	0	0	0	0	10006	ABI1	ABI1	4|sg_hABI1_01|ABI1	ABI1	ACCGGAGTTACCAGAACCTGACTCGTTTAAGAGCTATGCTGGAAACAGCATAGCAAGTTTAAATAAGGCTAGTCCGTTATCAACTTGAAAAAGTGGCACCGAGTCGGTGCTTTTTT
4|sgABI1_2|ABI1	GTTGTGTCGAGATATCTGCC	0	0	0	0	0	0	0	0	0	10006	ABI1	ABI1	4|sg_hABI1_02|ABI1	ABI1	ACCGGTTGTGTCGAGATATCTGCCGTTTAAGAGCTATGCTGGAAACAGCATAGCAAGTTTAAATAAGGCTAGTCCGTTATCAACTTGAAAAAGTGGCACCGAGTCGGTGCTTTTTT
4|sgABI1_3|ABI1	GTTTCCGAATATACCTTACA	0	0	0	0	0	0	0	0	0	10006	ABI1	ABI1	4|sg_hABI1_03|ABI1	ABI1	ACCGGTTTCCGAATATACCTTACAGTTTAAGAGCTATGCTGGAAACAGCATAGCAAGTTTAAATAAGGCTAGTCCGTTATCAACTTGAAAAAGTGGCACCGAGTCGGTGCTTTTTT
4|sgABI1_4|ABI1	TCGCCACCCACTATTGGACC	0	0	0	0	0	0	0	0	0	10006	ABI1	ABI1	4|sg_hABI1_04|ABI1	ABI1	ACCGTCGCCACCCACTATTGGACCGTTTAAGAGCTATGCTGGAAACAGCATAGCAAGTTTAAATAAGGCTAGTCCGTTATCAACTTGAAAAAGTGGCACCGAGTCGGTGCTTTTTT
4|sgABI2_1|ABI2	ACGAACTGGTCGTTCAAGGT	0	0	0	0	0	0	0	0	0	10152	ABI2	ABI2	4|sg_hABI2_01|ABI2	ABI2	ACCGACGAACTGGTCGTTCAAGGTGTTTAAGAGCTATGCTGGAAACAGCATAGCAAGTTTAAATAAGGCTAGTCCGTTATCAACTTGAAAAAGTGGCACCGAGTCGGTGCTTTTTT
4|sgABI2_2|ABI2	CATACTCCCCCAACAATAGG	0	0	0	0	0	1	0	0	0	10152	ABI2	ABI2	4|sg_hABI2_02|ABI2	ABI2	ACCGCATACTCCCCCAACAATAGGGTTTAAGAGCTATGCTGGAAACAGCATAGCAAGTTTAAATAAGGCTAGTCCGTTATCAACTTGAAAAAGTGGCACCGAGTCGGTGCTTTTTT
4|sgABI2_3|ABI2	TGCCTATCTGATAAACACCT	0	0	0	0	0	0	0	0	0	10152	ABI2	ABI2	4|sg_hABI2_03|ABI2	ABI2	ACCGTGCCTATCTGATAAACACCTGTTTAAGAGCTATGCTGGAAACAGCATAGCAAGTTTAAATAAGGCTAGTCCGTTATCAACTTGAAAAAGTGGCACCGAGTCGGTGCTTTTTT
4|sgABI2_4|ABI2	TTACCTGGAAAGACACTGGG	0	0	0	0	0	0	0	0	0	10152	ABI2	ABI2	4|sg_hABI2_04|ABI2	ABI2	ACCGTTACCTGGAAAGACACTGGGGTTTAAGAGCTATGCTGGAAACAGCATAGCAAGTTTAAATAAGGCTAGTCCGTTATCAACTTGAAAAAGTGGCACCGAGTCGGTGCTTTTTT
4|sgABI3_1|ABI3	CCTGTCTCGAAAGAGCATCA	0	0	0	0	0	0	0	0	0	51225	ABI3	ABI3	4|sg_hABI3_01|ABI3	ABI3	ACCGCCTGTCTCGAAAGAGCATCAGTTTAAGAGCTATGCTGGAAACAGCATAGCAAGTTTAAATAAGGCTAGTCCGTTATCAACTTGAAAAAGTGGCACCGAGTCGGTGCTTTTTT
4|sgABI3_2|ABI3	CGGGCACACTCTGCGCATGT	0	0	0	0	0	0	0	0	0	51225	ABI3	ABI3	4|sg_hABI3_02|ABI3	ABI3	ACCGCGGGCACACTCTGCGCATGTGTTTAAGAGCTATGCTGGAAACAGCATAGCAAGTTTAAATAAGGCTAGTCCGTTATCAACTTGAAAAAGTGGCACCGAGTCGGTGCTTTTTT
4|sgABI3_3|ABI3	GCGATGACCTTCTGGCCGGG	0	0	0	0	0	0	0	0	0	51225	ABI3	ABI3	4|sg_hABI3_03|ABI3	ABI3	ACCGGCGATGACCTTCTGGCCGGGGTTTAAGAGCTATGCTGGAAACAGCATAGCAAGTTTAAATAAGGCTAGTCCGTTATCAACTTGAAAAAGTGGCACCGAGTCGGTGCTTTTTT
4|sgABI3_4|ABI3	TCAGGCCACAGACAAGCGGA	0	0	0	0	0	0	0	0	0	51225	ABI3	ABI3	4|sg_hABI3_04|ABI3	ABI3	ACCGTCAGGCCACAGACAAGCGGAGTTTAAGAGCTATGCTGGAAACAGCATAGCAAGTTTAAATAAGGCTAGTCCGTTATCAACTTGAAAAAGTGGCACCGAGTCGGTGCTTTTTT
4|sgABI3BP_1|ABI3BP	GAGATATCAGATTCCTACAC	0	0	0	0	0	0	0	0	0	25890	ABI3BP	ABI3BP	4|sg_hABI3BP_01|ABI3BP	ABI3BP	ACCGGAGATATCAGATTCCTACACGTTTAAGAGCTATGCTGGAAACAGCATAGCAAGTTTAAATAAGGCTAGTCCGTTATCAACTTGAAAAAGTGGCACCGAGTCGGTGCTTTTTT
4|sgABI3BP_2|ABI3BP	GGGATAGATGTAGTTTGCTG	0	0	0	0	0	0	0	0	0	25890	ABI3BP	ABI3BP	4|sg_hABI3BP_02|ABI3BP	ABI3BP	ACCGGGGATAGATGTAGTTTGCTGGTTTAAGAGCTATGCTGGAAACAGCATAGCAAGTTTAAATAAGGCTAGTCCGTTATCAACTTGAAAAAGTGGCACCGAGTCGGTGCTTTTTT
4|sgABI3BP_3|ABI3BP	TCCTCATAAACCATACCCTG	0	0	0	0	0	0	0	0	0	25890	ABI3BP	ABI3BP	4|sg_hABI3BP_03|ABI3BP	ABI3BP	ACCGTCCTCATAAACCATACCCTGGTTTAAGAGCTATGCTGGAAACAGCATAGCAAGTTTAAATAAGGCTAGTCCGTTATCAACTTGAAAAAGTGGCACCGAGTCGGTGCTTTTTT
4|sgABI3BP_4|ABI3BP	TCTAATGCACTAGACGTAGT	0	0	0	0	0	0	0	0	0	25890	ABI3BP	ABI3BP	4|sg_hABI3BP_04|ABI3BP	ABI3BP	ACCGTCTAATGCACTAGACGTAGTGTTTAAGAGCTATGCTGGAAACAGCATAGCAAGTTTAAATAAGGCTAGTCCGTTATCAACTTGAAAAAGTGGCACCGAGTCGGTGCTTTTTT
4|sgABL1_1|ABL1	CTTAGGCTATAATCACAATG	0	0	0	0	0	0	0	0	0	25	ABL1	ABL1	4|sg_hABL1_01|ABL1	ABL1	ACCGCTTAGGCTATAATCACAATGGTTTAAGAGCTATGCTGGAAACAGCATAGCAAGTTTAAATAAGGCTAGTCCGTTATCAACTTGAAAAAGTGGCACCGAGTCGGTGCTTTTTT
4|sgABL1_2|ABL1	GGTTCATCATCATTCAACGG	0	0	7662	0	0	0	0	0	0	25	ABL1	ABL1	4|sg_hABL1_02|ABL1	ABL1	ACCGGGTTCATCATCATTCAACGGGTTTAAGAGCTATGCTGGAAACAGCATAGCAAGTTTAAATAAGGCTAGTCCGTTATCAACTTGAAAAAGTGGCACCGAGTCGGTGCTTTTTT
4|sgABL1_3|ABL1	TCAGTGATGATATAGAACGG	0	0	0	0	0	0	0	0	0	25	ABL1	ABL1	4|sg_hABL1_03|ABL1	ABL1	ACCGTCAGTGATGATATAGAACGGGTTTAAGAGCTATGCTGGAAACAGCATAGCAAGTTTAAATAAGGCTAGTCCGTTATCAACTTGAAAAAGTGGCACCGAGTCGGTGCTTTTTT
4|sgABL1_4|ABL1	TTGCTCCCTCGAAAAGAGCG	0	0	0	0	0	0	0	0	0	25	ABL1	ABL1	4|sg_hABL1_04|ABL1	ABL1	ACCGTTGCTCCCTCGAAAAGAGCGGTTTAAGAGCTATGCTGGAAACAGCATAGCAAGTTTAAATAAGGCTAGTCCGTTATCAACTTGAAAAAGTGGCACCGAGTCGGTGCTTTTTT
4|sgABL2_1|ABL2	AACCTCTGTAATGACGACGG	0	0	0	0	0	0	0	0	0	27	ABL2	ABL2	4|sg_hABL2_01|ABL2	ABL2	ACCGAACCTCTGTAATGACGACGGGTTTAAGAGCTATGCTGGAAACAGCATAGCAAGTTTAAATAAGGCTAGTCCGTTATCAACTTGAAAAAGTGGCACCGAGTCGGTGCTTTTTT
4|sgABL2_2|ABL2	GGTTCAACATCACAACCATA	1	2	1	97615	2	1	70	1	0	27	ABL2	ABL2	4|sg_hABL2_02|ABL2	ABL2	ACCGGGTTCAACATCACAACCATAGTTTAAGAGCTATGCTGGAAACAGCATAGCAAGTTTAAATAAGGCTAGTCCGTTATCAACTTGAAAAAGTGGCACCGAGTCGGTGCTTTTTT
4|sgABL2_3|ABL2	TATCGAATGGAACAGCCTGA	0	0	0	0	0	0	0	0	0	27	ABL2	ABL2	4|sg_hABL2_03|ABL2	ABL2	ACCGTATCGAATGGAACAGCCTGAGTTTAAGAGCTATGCTGGAAACAGCATAGCAAGTTTAAATAAGGCTAGTCCGTTATCAACTTGAAAAAGTGGCACCGAGTCGGTGCTTTTTT
4|sgABL2_4|ABL2	TGTACACCATCACTCCACAG	0	0	0	0	0	0	0	0	0	27	ABL2	ABL2	4|sg_hABL2_04|ABL2	ABL2	ACCGTGTACACCATCACTCCACAGGTTTAAGAGCTATGCTGGAAACAGCATAGCAAGTTTAAATAAGGCTAGTCCGTTATCAACTTGAAAAAGTGGCACCGAGTCGGTGCTTTTTT
4|sgABLIM1_1|ABLIM1	TAAGCAATCTACGAAGACCG	0	0	0	0	0	0	0	0	0	3983	ABLIM1	ABLIM1	4|sg_hABLIM1_01|ABLIM1	ABLIM1	ACCGTAAGCAATCTACGAAGACCGGTTTAAGAGCTATGCTGGAAACAGCATAGCAAGTTTAAATAAGGCTAGTCCGTTATCAACTTGAAAAAGTGGCACCGAGTCGGTGCTTTTTT
4|sgABLIM1_2|ABLIM1	TCTAACTCCAACTTACGCTC	0	0	0	0	0	0	0	0	0	3983	ABLIM1	ABLIM1	4|sg_hABLIM1_02|ABLIM1	ABLIM1	ACCGTCTAACTCCAACTTACGCTCGTTTAAGAGCTATGCTGGAAACAGCATAGCAAGTTTAAATAAGGCTAGTCCGTTATCAACTTGAAAAAGTGGCACCGAGTCGGTGCTTTTTT
4|sgABLIM1_3|ABLIM1	TCTTTCGGACTGGACGACAT	0	1	0	0	0	0	0	0	0	3983	ABLIM1	ABLIM1	4|sg_hABLIM1_03|ABLIM1	ABLIM1	ACCGTCTTTCGGACTGGACGACATGTTTAAGAGCTATGCTGGAAACAGCATAGCAAGTTTAAATAAGGCTAGTCCGTTATCAACTTGAAAAAGTGGCACCGAGTCGGTGCTTTTTT
4|sgABLIM1_4|ABLIM1	TGTTACATACACGCCCACGT	0	0	0	0	0	0	0	0	0	3983	ABLIM1	ABLIM1	4|sg_hABLIM1_04|ABLIM1	ABLIM1	ACCGTGTTACATACACGCCCACGTGTTTAAGAGCTATGCTGGAAACAGCATAGCAAGTTTAAATAAGGCTAGTCCGTTATCAACTTGAAAAAGTGGCACCGAGTCGGTGCTTTTTT
4|sgABLIM2_1|ABLIM2	AGGTCGGAGTGTAGCGCCCG	0	0	0	0	0	1	0	0	0	84448	ABLIM2	ABLIM2	4|sg_hABLIM2_01|ABLIM2	ABLIM2	ACCGAGGTCGGAGTGTAGCGCCCGGTTTAAGAGCTATGCTGGAAACAGCATAGCAAGTTTAAATAAGGCTAGTCCGTTATCAACTTGAAAAAGTGGCACCGAGTCGGTGCTTTTTT
4|sgABLIM2_2|ABLIM2	CTTACATAAATCACACGGCT	0	0	0	0	0	0	0	0	0	84448	ABLIM2	ABLIM2	4|sg_hABLIM2_02|ABLIM2	ABLIM2	ACCGCTTACATAAATCACACGGCTGTTTAAGAGCTATGCTGGAAACAGCATAGCAAGTTTAAATAAGGCTAGTCCGTTATCAACTTGAAAAAGTGGCACCGAGTCGGTGCTTTTTT
4|sgABLIM2_3|ABLIM2	GCTGTGAGAAATACATCACG	0	0	0	0	0	0	0	0	0	84448	ABLIM2	ABLIM2	4|sg_hABLIM2_03|ABLIM2	ABLIM2	ACCGGCTGTGAGAAATACATCACGGTTTAAGAGCTATGCTGGAAACAGCATAGCAAGTTTAAATAAGGCTAGTCCGTTATCAACTTGAAAAAGTGGCACCGAGTCGGTGCTTTTTT
4|sgABLIM2_4|ABLIM2	GTGAGTAGGAGATCATGTCG	0	0	0	0	0	0	0	0	0	84448	ABLIM2	ABLIM2	4|sg_hABLIM2_04|ABLIM2	ABLIM2	ACCGGTGAGTAGGAGATCATGTCGGTTTAAGAGCTATGCTGGAAACAGCATAGCAAGTTTAAATAAGGCTAGTCCGTTATCAACTTGAAAAAGTGGCACCGAGTCGGTGCTTTTTT
4|sgABLIM3_1|ABLIM3	AGGTCACCTTGTCTCCAATG	0	0	7163	0	0	1	0	0	0	22885	ABLIM3	ABLIM3	4|sg_hABLIM3_01|ABLIM3	ABLIM3	ACCGAGGTCACCTTGTCTCCAATGGTTTAAGAGCTATGCTGGAAACAGCATAGCAAGTTTAAATAAGGCTAGTCCGTTATCAACTTGAAAAAGTGGCACCGAGTCGGTGCTTTTTT
4|sgABLIM3_2|ABLIM3	CAAGGTTAAGTCTATCTACG	0	0	0	0	0	0	0	0	0	22885	ABLIM3	ABLIM3	4|sg_hABLIM3_02|ABLIM3	ABLIM3	ACCGCAAGGTTAAGTCTATCTACGGTTTAAGAGCTATGCTGGAAACAGCATAGCAAGTTTAAATAAGGCTAGTCCGTTATCAACTTGAAAAAGTGGCACCGAGTCGGTGCTTTTTT
4|sgABLIM3_3|ABLIM3	GGAAGTGGTTGTTGTGCACG	0	0	0	317	0	0	0	0	0	22885	ABLIM3	ABLIM3	4|sg_hABLIM3_03|ABLIM3	ABLIM3	ACCGGGAAGTGGTTGTTGTGCACGGTTTAAGAGCTATGCTGGAAACAGCATAGCAAGTTTAAATAAGGCTAGTCCGTTATCAACTTGAAAAAGTGGCACCGAGTCGGTGCTTTTTT
4|sgABLIM3_4|ABLIM3	TGGGGGAGTCTATGTACCCC	0	0	0	0	0	0	0	0	0	22885	ABLIM3	ABLIM3	4|sg_hABLIM3_04|ABLIM3	ABLIM3	ACCGTGGGGGAGTCTATGTACCCCGTTTAAGAGCTATGCTGGAAACAGCATAGCAAGTTTAAATAAGGCTAGTCCGTTATCAACTTGAAAAAGTGGCACCGAGTCGGTGCTTTTTT
4|sgABO_1|ABO	AGCCAAAGGTGCTGACACCG	0	0	0	0	0	0	0	0	0	28	ABO	ABO	4|sg_hABO_01|ABO	ABO	ACCGAGCCAAAGGTGCTGACACCGGTTTAAGAGCTATGCTGGAAACAGCATAGCAAGTTTAAATAAGGCTAGTCCGTTATCAACTTGAAAAAGTGGCACCGAGTCGGTGCTTTTTT
4|sgABO_2|ABO	ATGGAGTTCCGCGACCACGT	0	0	0	0	0	0	0	0	0	28	ABO	ABO	4|sg_hABO_02|ABO	ABO	ACCGATGGAGTTCCGCGACCACGTGTTTAAGAGCTATGCTGGAAACAGCATAGCAAGTTTAAATAAGGCTAGTCCGTTATCAACTTGAAAAAGTGGCACCGAGTCGGTGCTTTTTT
4|sgABO_3|ABO	CCGGTCCCCAGCGTCACGCG	0	0	0	0	0	0	0	0	0	28	ABO	ABO	4|sg_hABO_03|ABO	ABO	ACCGCCGGTCCCCAGCGTCACGCGGTTTAAGAGCTATGCTGGAAACAGCATAGCAAGTTTAAATAAGGCTAGTCCGTTATCAACTTGAAAAAGTGGCACCGAGTCGGTGCTTTTTT
4|sgABO_4|ABO	TGATCAGTGACTTCTGCGAG	0	0	0	0	0	0	0	0	0	28	ABO	ABO	4|sg_hABO_04|ABO	ABO	ACCGTGATCAGTGACTTCTGCGAGGTTTAAGAGCTATGCTGGAAACAGCATAGCAAGTTTAAATAAGGCTAGTCCGTTATCAACTTGAAAAAGTGGCACCGAGTCGGTGCTTTTTT
4|sgABR_1|ABR	CAAGAGTGAAATCCAGAAGG	0	0	0	0	0	0	0	0	0	29	ABR	ABR	4|sg_hABR_01|ABR	ABR	ACCGCAAGAGTGAAATCCAGAAGGGTTTAAGAGCTATGCTGGAAACAGCATAGCAAGTTTAAATAAGGCTAGTCCGTTATCAACTTGAAAAAGTGGCACCGAGTCGGTGCTTTTTT
4|sgABR_2|ABR	CTGCAGTGACAACGCCCAAG	0	0	0	0	0	0	0	0	0	29	ABR	ABR	4|sg_hABR_02|ABR	ABR	ACCGCTGCAGTGACAACGCCCAAGGTTTAAGAGCTATGCTGGAAACAGCATAGCAAGTTTAAATAAGGCTAGTCCGTTATCAACTTGAAAAAGTGGCACCGAGTCGGTGCTTTTTT
4|sgABR_3|ABR	GAGGCTTGACACTCACGTGT	0	0	0	0	0	0	0	0	0	29	ABR	ABR	4|sg_hABR_03|ABR	ABR	ACCGGAGGCTTGACACTCACGTGTGTTTAAGAGCTATGCTGGAAACAGCATAGCAAGTTTAAATAAGGCTAGTCCGTTATCAACTTGAAAAAGTGGCACCGAGTCGGTGCTTTTTT
4|sgABR_4|ABR	TACTGTCCTCGGACTACGAG	0	0	0	0	0	0	0	0	1	29	ABR	ABR	4|sg_hABR_04|ABR	ABR	ACCGTACTGTCCTCGGACTACGAGGTTTAAGAGCTATGCTGGAAACAGCATAGCAAGTTTAAATAAGGCTAGTCCGTTATCAACTTGAAAAAGTGGCACCGAGTCGGTGCTTTTTT
4|sgABRA_1|ABRA	CCTCAGCCACAGGTACGAGA	0	0	0	0	0	0	0	0	0	137735	ABRA	ABRA	4|sg_hABRA_01|ABRA	ABRA	ACCGCCTCAGCCACAGGTACGAGAGTTTAAGAGCTATGCTGGAAACAGCATAGCAAGTTTAAATAAGGCTAGTCCGTTATCAACTTGAAAAAGTGGCACCGAGTCGGTGCTTTTTT
4|sgABRA_2|ABRA	CCTGGTGTCTGAGCTAACCA	0	0	0	0	0	0	0	0	0	137735	ABRA	ABRA	4|sg_hABRA_02|ABRA	ABRA	ACCGCCTGGTGTCTGAGCTAACCAGTTTAAGAGCTATGCTGGAAACAGCATAGCAAGTTTAAATAAGGCTAGTCCGTTATCAACTTGAAAAAGTGGCACCGAGTCGGTGCTTTTTT
4|sgABRA_3|ABRA	GAAAGAGGTGTCCAAAACGG	0	0	0	0	0	0	0	0	0	137735	ABRA	ABRA	4|sg_hABRA_03|ABRA	ABRA	ACCGGAAAGAGGTGTCCAAAACGGGTTTAAGAGCTATGCTGGAAACAGCATAGCAAGTTTAAATAAGGCTAGTCCGTTATCAACTTGAAAAAGTGGCACCGAGTCGGTGCTTTTTT
4|sgABRA_4|ABRA	GAATGCATTCACTTACTGGG	0	0	0	0	0	0	0	0	0	137735	ABRA	ABRA	4|sg_hABRA_04|ABRA	ABRA	ACCGGAATGCATTCACTTACTGGGGTTTAAGAGCTATGCTGGAAACAGCATAGCAAGTTTAAATAAGGCTAGTCCGTTATCAACTTGAAAAAGTGGCACCGAGTCGGTGCTTTTTT
4|sgABRACL_1|ABRACL	AAAGTTAAGCGTGAAATTTG	0	0	0	0	0	0	0	0	0	58527	ABRACL	ABRACL	4|sg_hABRACL_01|ABRACL	ABRACL	ACCGAAAGTTAAGCGTGAAATTTGGTTTAAGAGCTATGCTGGAAACAGCATAGCAAGTTTAAATAAGGCTAGTCCGTTATCAACTTGAAAAAGTGGCACCGAGTCGGTGCTTTTTT
4|sgABRACL_2|ABRACL	AGCAATGAATGTGGATCACG	0	0	0	0	0	0	0	0	0	58527	ABRACL	ABRACL	4|sg_hABRACL_02|ABRACL	ABRACL	ACCGAGCAATGAATGTGGATCACGGTTTAAGAGCTATGCTGGAAACAGCATAGCAAGTTTAAATAAGGCTAGTCCGTTATCAACTTGAAAAAGTGGCACCGAGTCGGTGCTTTTTT
4|sgABRACL_3|ABRACL	CGAGGTTAACCTCTTAGTGG	0	0	0	0	0	0	0	0	0	58527	ABRACL	ABRACL	4|sg_hABRACL_03|ABRACL	ABRACL	ACCGCGAGGTTAACCTCTTAGTGGGTTTAAGAGCTATGCTGGAAACAGCATAGCAAGTTTAAATAAGGCTAGTCCGTTATCAACTTGAAAAAGTGGCACCGAGTCGGTGCTTTTTT
4|sgABRACL_4|ABRACL	GGTTGGCACATTTATCATCA	0	0	0	0	0	0	0	0	0	58527	ABRACL	ABRACL	4|sg_hABRACL_04|ABRACL	ABRACL	ACCGGGTTGGCACATTTATCATCAGTTTAAGAGCTATGCTGGAAACAGCATAGCAAGTTTAAATAAGGCTAGTCCGTTATCAACTTGAAAAAGTGGCACCGAGTCGGTGCTTTTTT
4|sgABT1_1|ABT1	AAAAAAGCGGTCCTACACCA	0	0	0	0	0	0	0	0	0	29777	ABT1	ABT1	4|sg_hABT1_01|ABT1	ABT1	ACCGAAAAAAGCGGTCCTACACCAGTTTAAGAGCTATGCTGGAAACAGCATAGCAAGTTTAAATAAGGCTAGTCCGTTATCAACTTGAAAAAGTGGCACCGAGTCGGTGCTTTTTT
4|sgABT1_2|ABT1	AGAACAGACACTAGATGCGG	1	0	0	0	0	0	0	0	0	29777	ABT1	ABT1	4|sg_hABT1_02|ABT1	ABT1	ACCGAGAACAGACACTAGATGCGGGTTTAAGAGCTATGCTGGAAACAGCATAGCAAGTTTAAATAAGGCTAGTCCGTTATCAACTTGAAAAAGTGGCACCGAGTCGGTGCTTTTTT
4|sgABT1_3|ABT1	GACGCGTCCGACCTCGCCAT	0	0	0	0	0	0	0	0	0	29777	ABT1	ABT1	4|sg_hABT1_03|ABT1	ABT1	ACCGGACGCGTCCGACCTCGCCATGTTTAAGAGCTATGCTGGAAACAGCATAGCAAGTTTAAATAAGGCTAGTCCGTTATCAACTTGAAAAAGTGGCACCGAGTCGGTGCTTTTTT
4|sgABT1_4|ABT1	GTTCCAAAGATCATAACGGA	0	0	0	0	0	0	0	0	0	29777	ABT1	ABT1	4|sg_hABT1_04|ABT1	ABT1	ACCGGTTCCAAAGATCATAACGGAGTTTAAGAGCTATGCTGGAAACAGCATAGCAAGTTTAAATAAGGCTAGTCCGTTATCAACTTGAAAAAGTGGCACCGAGTCGGTGCTTTTTT
4|sgABTB1_1|ABTB1	CGCACTTACTCGGAGCTCGG	0	0	0	0	0	0	0	0	0	80325	ABTB1	ABTB1	4|sg_hABTB1_01|ABTB1	ABTB1	ACCGCGCACTTACTCGGAGCTCGGGTTTAAGAGCTATGCTGGAAACAGCATAGCAAGTTTAAATAAGGCTAGTCCGTTATCAACTTGAAAAAGTGGCACCGAGTCGGTGCTTTTTT
4|sgABTB1_2|ABTB1	CTACAAAGACCACGTCACTG	0	0	0	0	0	1	0	0	0	80325	ABTB1	ABTB1	4|sg_hABTB1_02|ABTB1	ABTB1	ACCGCTACAAAGACCACGTCACTGGTTTAAGAGCTATGCTGGAAACAGCATAGCAAGTTTAAATAAGGCTAGTCCGTTATCAACTTGAAAAAGTGGCACCGAGTCGGTGCTTTTTT
4|sgABTB1_3|ABTB1	GGGCTCGGAAGTAGTCACTG	0	0	0	0	0	0	0	0	0	80325	ABTB1	ABTB1	4|sg_hABTB1_03|ABTB1	ABTB1	ACCGGGGCTCGGAAGTAGTCACTGGTTTAAGAGCTATGCTGGAAACAGCATAGCAAGTTTAAATAAGGCTAGTCCGTTATCAACTTGAAAAAGTGGCACCGAGTCGGTGCTTTTTT
4|sgABTB1_4|ABTB1	TGTAATCGCGTAGAGCCCGG	0	0	0	0	0	0	0	0	0	80325	ABTB1	ABTB1	4|sg_hABTB1_04|ABTB1	ABTB1	ACCGTGTAATCGCGTAGAGCCCGGGTTTAAGAGCTATGCTGGAAACAGCATAGCAAGTTTAAATAAGGCTAGTCCGTTATCAACTTGAAAAAGTGGCACCGAGTCGGTGCTTTTTT
4|sgABTB2_1|ABTB2	AGGGGCTGAAGTATGCGGGG	0	0	0	0	0	0	0	0	0	25841	ABTB2	ABTB2	4|sg_hABTB2_01|ABTB2	ABTB2	ACCGAGGGGCTGAAGTATGCGGGGGTTTAAGAGCTATGCTGGAAACAGCATAGCAAGTTTAAATAAGGCTAGTCCGTTATCAACTTGAAAAAGTGGCACCGAGTCGGTGCTTTTTT
4|sgABTB2_2|ABTB2	CCTCATCAACCAAGCCATCG	0	0	0	0	0	0	0	0	0	25841	ABTB2	ABTB2	4|sg_hABTB2_02|ABTB2	ABTB2	ACCGCCTCATCAACCAAGCCATCGGTTTAAGAGCTATGCTGGAAACAGCATAGCAAGTTTAAATAAGGCTAGTCCGTTATCAACTTGAAAAAGTGGCACCGAGTCGGTGCTTTTTT
4|sgABTB2_3|ABTB2	GAGGGCTCGGCAGTGAACGG	0	0	0	0	0	0	0	0	0	25841	ABTB2	ABTB2	4|sg_hABTB2_03|ABTB2	ABTB2	ACCGGAGGGCTCGGCAGTGAACGGGTTTAAGAGCTATGCTGGAAACAGCATAGCAAGTTTAAATAAGGCTAGTCCGTTATCAACTTGAAAAAGTGGCACCGAGTCGGTGCTTTTTT
4|sgABTB2_4|ABTB2	TGTTCAAGGTCATTCTCGGG	0	0	0	0	0	0	0	0	0	25841	ABTB2	ABTB2	4|sg_hABTB2_04|ABTB2	ABTB2	ACCGTGTTCAAGGTCATTCTCGGGGTTTAAGAGCTATGCTGGAAACAGCATAGCAAGTTTAAATAAGGCTAGTCCGTTATCAACTTGAAAAAGTGGCACCGAGTCGGTGCTTTTTT
4|sgACAA1_1|ACAA1	AGCGCGAAGTAATATTTCCA	0	0	0	0	0	0	0	0	0	30	ACAA1	ACAA1	4|sg_hACAA1_01|ACAA1	ACAA1	ACCGAGCGCGAAGTAATATTTCCAGTTTAAGAGCTATGCTGGAAACAGCATAGCAAGTTTAAATAAGGCTAGTCCGTTATCAACTTGAAAAAGTGGCACCGAGTCGGTGCTTTTTT
4|sgACAA1_2|ACAA1	CTGCCGAGAGAAGCTCGTCG	0	0	0	0	0	0	0	0	0	30	ACAA1	ACAA1	4|sg_hACAA1_02|ACAA1	ACAA1	ACCGCTGCCGAGAGAAGCTCGTCGGTTTAAGAGCTATGCTGGAAACAGCATAGCAAGTTTAAATAAGGCTAGTCCGTTATCAACTTGAAAAAGTGGCACCGAGTCGGTGCTTTTTT
4|sgACAA1_3|ACAA1	GCCCTTGTCATCATGGACCG	0	0	0	0	0	0	0	0	0	30	ACAA1	ACAA1	4|sg_hACAA1_03|ACAA1	ACAA1	ACCGGCCCTTGTCATCATGGACCGGTTTAAGAGCTATGCTGGAAACAGCATAGCAAGTTTAAATAAGGCTAGTCCGTTATCAACTTGAAAAAGTGGCACCGAGTCGGTGCTTTTTT
4|sgACAA1_4|ACAA1	TCAATAGACAGTGTTCGTCG	0	0	0	0	0	0	0	0	0	30	ACAA1	ACAA1	4|sg_hACAA1_04|ACAA1	ACAA1	ACCGTCAATAGACAGTGTTCGTCGGTTTAAGAGCTATGCTGGAAACAGCATAGCAAGTTTAAATAAGGCTAGTCCGTTATCAACTTGAAAAAGTGGCACCGAGTCGGTGCTTTTTT
4|sgACAA2_1|ACAA2	TACCTGACATCCATTCACAA	0	0	0	0	0	0	0	0	0	10449	ACAA2	ACAA2	4|sg_hACAA2_01|ACAA2	ACAA2	ACCGTACCTGACATCCATTCACAAGTTTAAGAGCTATGCTGGAAACAGCATAGCAAGTTTAAATAAGGCTAGTCCGTTATCAACTTGAAAAAGTGGCACCGAGTCGGTGCTTTTTT
4|sgACAA2_2|ACAA2	TAGCAGTGAAGTCTTTCAGA	0	0	0	0	0	24580	0	0	1	10449	ACAA2	ACAA2	4|sg_hACAA2_02|ACAA2	ACAA2	ACCGTAGCAGTGAAGTCTTTCAGAGTTTAAGAGCTATGCTGGAAACAGCATAGCAAGTTTAAATAAGGCTAGTCCGTTATCAACTTGAAAAAGTGGCACCGAGTCGGTGCTTTTTT
4|sgACAA2_3|ACAA2	TGTTACTGCAGGGAATGCAT	0	0	0	0	0	0	0	0	1	10449	ACAA2	ACAA2	4|sg_hACAA2_03|ACAA2	ACAA2	ACCGTGTTACTGCAGGGAATGCATGTTTAAGAGCTATGCTGGAAACAGCATAGCAAGTTTAAATAAGGCTAGTCCGTTATCAACTTGAAAAAGTGGCACCGAGTCGGTGCTTTTTT
4|sgACAA2_4|ACAA2	TTTCTGTAACTGTTCCAGGG	0	0	0	0	0	0	0	0	0	10449	ACAA2	ACAA2	4|sg_hACAA2_04|ACAA2	ACAA2	ACCGTTTCTGTAACTGTTCCAGGGGTTTAAGAGCTATGCTGGAAACAGCATAGCAAGTTTAAATAAGGCTAGTCCGTTATCAACTTGAAAAAGTGGCACCGAGTCGGTGCTTTTTT
4|sgACACA_1|ACACA	AATGCATGCGGTCTATCCGT	0	0	0	0	0	0	0	0	0	31	ACACA	ACACA	4|sg_hACACA_01|ACACA	ACACA	ACCGAATGCATGCGGTCTATCCGTGTTTAAGAGCTATGCTGGAAACAGCATAGCAAGTTTAAATAAGGCTAGTCCGTTATCAACTTGAAAAAGTGGCACCGAGTCGGTGCTTTTTT
4|sgACACA_2|ACACA	CCAGAGTCCCACATTCCCTG	0	0	0	0	0	0	0	0	0	31	ACACA	ACACA	4|sg_hACACA_02|ACACA	ACACA	ACCGCCAGAGTCCCACATTCCCTGGTTTAAGAGCTATGCTGGAAACAGCATAGCAAGTTTAAATAAGGCTAGTCCGTTATCAACTTGAAAAAGTGGCACCGAGTCGGTGCTTTTTT
4|sgACACA_3|ACACA	TATTTGCCTAGGTACCGAAG	0	0	0	0	0	0	0	0	0	31	ACACA	ACACA	4|sg_hACACA_03|ACACA	ACACA	ACCGTATTTGCCTAGGTACCGAAGGTTTAAGAGCTATGCTGGAAACAGCATAGCAAGTTTAAATAAGGCTAGTCCGTTATCAACTTGAAAAAGTGGCACCGAGTCGGTGCTTTTTT
4|sgACACA_4|ACACA	TGATGGGTCCATGATAACCG	0	0	0	0	0	0	0	0	0	31	ACACA	ACACA	4|sg_hACACA_04|ACACA	ACACA	ACCGTGATGGGTCCATGATAACCGGTTTAAGAGCTATGCTGGAAACAGCATAGCAAGTTTAAATAAGGCTAGTCCGTTATCAACTTGAAAAAGTGGCACCGAGTCGGTGCTTTTTT
4|sgACACB_1|ACACB	AAAGCGTGTGACAAACTCAG	252672	2	6706	2	5	2	5	33	9	32	ACACB	ACACB	4|sg_hACACB_01|ACACB	ACACB	ACCGAAAGCGTGTGACAAACTCAGGTTTAAGAGCTATGCTGGAAACAGCATAGCAAGTTTAAATAAGGCTAGTCCGTTATCAACTTGAAAAAGTGGCACCGAGTCGGTGCTTTTTT
4|sgACACB_2|ACACB	ACAACGACATCGACACCGGG	0	0	0	0	0	0	0	0	0	32	ACACB	ACACB	4|sg_hACACB_02|ACACB	ACACB	ACCGACAACGACATCGACACCGGGGTTTAAGAGCTATGCTGGAAACAGCATAGCAAGTTTAAATAAGGCTAGTCCGTTATCAACTTGAAAAAGTGGCACCGAGTCGGTGCTTTTTT
4|sgACACB_3|ACACB	GAACTCGAATATGGCCAGCG	1	0	27300	0	0	1	0	1	1	32	ACACB	ACACB	4|sg_hACACB_03|ACACB	ACACB	ACCGGAACTCGAATATGGCCAGCGGTTTAAGAGCTATGCTGGAAACAGCATAGCAAGTTTAAATAAGGCTAGTCCGTTATCAACTTGAAAAAGTGGCACCGAGTCGGTGCTTTTTT
4|sgACACB_4|ACACB	GTCGGAGTCCATAATCCACA	0	0	0	0	0	0	0	0	0	32	ACACB	ACACB	4|sg_hACACB_04|ACACB	ACACB	ACCGGTCGGAGTCCATAATCCACAGTTTAAGAGCTATGCTGGAAACAGCATAGCAAGTTTAAATAAGGCTAGTCCGTTATCAACTTGAAAAAGTGGCACCGAGTCGGTGCTTTTTT
4|sgACAD10_1|ACAD10	AGCTCGATACTGCTTAACCC	0	0	0	0	0	0	0	0	0	80724	ACAD10	ACAD10	4|sg_hACAD10_01|ACAD10	ACAD10	ACCGAGCTCGATACTGCTTAACCCGTTTAAGAGCTATGCTGGAAACAGCATAGCAAGTTTAAATAAGGCTAGTCCGTTATCAACTTGAAAAAGTGGCACCGAGTCGGTGCTTTTTT
4|sgACAD10_2|ACAD10	ATCGCTTGTAGACTCCCTGT	0	0	0	0	0	0	0	0	0	80724	ACAD10	ACAD10	4|sg_hACAD10_02|ACAD10	ACAD10	ACCGATCGCTTGTAGACTCCCTGTGTTTAAGAGCTATGCTGGAAACAGCATAGCAAGTTTAAATAAGGCTAGTCCGTTATCAACTTGAAAAAGTGGCACCGAGTCGGTGCTTTTTT
4|sgACAD10_3|ACAD10	CCAGCTCATACCTCAAGGGG	0	0	1	0	0	0	0	5776	0	80724	ACAD10	ACAD10	4|sg_hACAD10_03|ACAD10	ACAD10	ACCGCCAGCTCATACCTCAAGGGGGTTTAAGAGCTATGCTGGAAACAGCATAGCAAGTTTAAATAAGGCTAGTCCGTTATCAACTTGAAAAAGTGGCACCGAGTCGGTGCTTTTTT
4|sgACAD10_4|ACAD10	TCCAACTTACTACATCAGGC	0	0	0	0	0	0	0	0	0	80724	ACAD10	ACAD10	4|sg_hACAD10_04|ACAD10	ACAD10	ACCGTCCAACTTACTACATCAGGCGTTTAAGAGCTATGCTGGAAACAGCATAGCAAGTTTAAATAAGGCTAGTCCGTTATCAACTTGAAAAAGTGGCACCGAGTCGGTGCTTTTTT
4|sgACAD11_1|ACAD11	CCACTCCGATAGCTGTTGCA	0	0	0	0	0	0	0	0	0	84129	ACAD11	ACAD11	4|sg_hACAD11_01|ACAD11	ACAD11	ACCGCCACTCCGATAGCTGTTGCAGTTTAAGAGCTATGCTGGAAACAGCATAGCAAGTTTAAATAAGGCTAGTCCGTTATCAACTTGAAAAAGTGGCACCGAGTCGGTGCTTTTTT
4|sgACAD11_2|ACAD11	CCTTGGCCAAAAGTAGAACA	0	0	0	0	0	0	0	0	0	84129	ACAD11	ACAD11	4|sg_hACAD11_02|ACAD11	ACAD11	ACCGCCTTGGCCAAAAGTAGAACAGTTTAAGAGCTATGCTGGAAACAGCATAGCAAGTTTAAATAAGGCTAGTCCGTTATCAACTTGAAAAAGTGGCACCGAGTCGGTGCTTTTTT
4|sgACAD11_3|ACAD11	CTGAGCCAATGTTTCTACCG	0	0	0	0	0	0	0	0	0	84129	ACAD11	ACAD11	4|sg_hACAD11_03|ACAD11	ACAD11	ACCGCTGAGCCAATGTTTCTACCGGTTTAAGAGCTATGCTGGAAACAGCATAGCAAGTTTAAATAAGGCTAGTCCGTTATCAACTTGAAAAAGTGGCACCGAGTCGGTGCTTTTTT
4|sgACAD11_4|ACAD11	TTGTTTGTACAGACTCGGAA	0	0	0	0	0	0	0	0	0	84129	ACAD11	ACAD11	4|sg_hACAD11_04|ACAD11	ACAD11	ACCGTTGTTTGTACAGACTCGGAAGTTTAAGAGCTATGCTGGAAACAGCATAGCAAGTTTAAATAAGGCTAGTCCGTTATCAACTTGAAAAAGTGGCACCGAGTCGGTGCTTTTTT
4|sgACAD8_1|ACAD8	CAAGGCTTCAAAAATGACAG	0	0	0	0	0	0	0	0	2	27034	ACAD8	ACAD8	4|sg_hACAD8_01|ACAD8	ACAD8	ACCGCAAGGCTTCAAAAATGACAGGTTTAAGAGCTATGCTGGAAACAGCATAGCAAGTTTAAATAAGGCTAGTCCGTTATCAACTTGAAAAAGTGGCACCGAGTCGGTGCTTTTTT
4|sgACAD8_2|ACAD8	GCTTCGGAAATGAGGAACAG	0	0	0	0	0	0	0	0	0	27034	ACAD8	ACAD8	4|sg_hACAD8_02|ACAD8	ACAD8	ACCGGCTTCGGAAATGAGGAACAGGTTTAAGAGCTATGCTGGAAACAGCATAGCAAGTTTAAATAAGGCTAGTCCGTTATCAACTTGAAAAAGTGGCACCGAGTCGGTGCTTTTTT
4|sgACAD8_3|ACAD8	TCAGTCCTCTCACGGCAATG	0	0	0	0	0	0	0	0	0	27034	ACAD8	ACAD8	4|sg_hACAD8_03|ACAD8	ACAD8	ACCGTCAGTCCTCTCACGGCAATGGTTTAAGAGCTATGCTGGAAACAGCATAGCAAGTTTAAATAAGGCTAGTCCGTTATCAACTTGAAAAAGTGGCACCGAGTCGGTGCTTTTTT
4|sgACAD8_4|ACAD8	TCGAAGATCACAGCTCGTGT	0	0	0	0	0	0	0	0	0	27034	ACAD8	ACAD8	4|sg_hACAD8_04|ACAD8	ACAD8	ACCGTCGAAGATCACAGCTCGTGTGTTTAAGAGCTATGCTGGAAACAGCATAGCAAGTTTAAATAAGGCTAGTCCGTTATCAACTTGAAAAAGTGGCACCGAGTCGGTGCTTTTTT
4|sgACAD9_1|ACAD9	CACCATGTACTCAAGACTAG	0	0	0	0	0	0	0	0	0	28976	ACAD9	ACAD9	4|sg_hACAD9_01|ACAD9	ACAD9	ACCGCACCATGTACTCAAGACTAGGTTTAAGAGCTATGCTGGAAACAGCATAGCAAGTTTAAATAAGGCTAGTCCGTTATCAACTTGAAAAAGTGGCACCGAGTCGGTGCTTTTTT
4|sgACAD9_2|ACAD9	CTTGCCTAAACTGGCGTCCG	0	0	0	0	0	0	0	0	0	28976	ACAD9	ACAD9	4|sg_hACAD9_02|ACAD9	ACAD9	ACCGCTTGCCTAAACTGGCGTCCGGTTTAAGAGCTATGCTGGAAACAGCATAGCAAGTTTAAATAAGGCTAGTCCGTTATCAACTTGAAAAAGTGGCACCGAGTCGGTGCTTTTTT
4|sgACAD9_3|ACAD9	GAAGATAAATTAGGCATTCG	0	0	0	0	0	0	0	0	0	28976	ACAD9	ACAD9	4|sg_hACAD9_03|ACAD9	ACAD9	ACCGGAAGATAAATTAGGCATTCGGTTTAAGAGCTATGCTGGAAACAGCATAGCAAGTTTAAATAAGGCTAGTCCGTTATCAACTTGAAAAAGTGGCACCGAGTCGGTGCTTTTTT
4|sgACAD9_4|ACAD9	GGACTCCCGAAAAATTGACC	0	0	0	0	0	0	0	0	0	28976	ACAD9	ACAD9	4|sg_hACAD9_04|ACAD9	ACAD9	ACCGGGACTCCCGAAAAATTGACCGTTTAAGAGCTATGCTGGAAACAGCATAGCAAGTTTAAATAAGGCTAGTCCGTTATCAACTTGAAAAAGTGGCACCGAGTCGGTGCTTTTTT
4|sgACADL_1|ACADL	CAGAAAAAGGCTAATACCAT	0	0	0	0	0	0	0	0	0	33	ACADL	ACADL	4|sg_hACADL_01|ACADL	ACADL	ACCGCAGAAAAAGGCTAATACCATGTTTAAGAGCTATGCTGGAAACAGCATAGCAAGTTTAAATAAGGCTAGTCCGTTATCAACTTGAAAAAGTGGCACCGAGTCGGTGCTTTTTT
4|sgACADL_2|ACADL	CTCCTCCCAGACAATAGCTG	0	0	0	0	0	0	0	0	0	33	ACADL	ACADL	4|sg_hACADL_02|ACADL	ACADL	ACCGCTCCTCCCAGACAATAGCTGGTTTAAGAGCTATGCTGGAAACAGCATAGCAAGTTTAAATAAGGCTAGTCCGTTATCAACTTGAAAAAGTGGCACCGAGTCGGTGCTTTTTT
4|sgACADL_3|ACADL	GCCACTTACTCTGAGTGATG	0	1	0	39290	2	0	29	1	0	33	ACADL	ACADL	4|sg_hACADL_03|ACADL	ACADL	ACCGGCCACTTACTCTGAGTGATGGTTTAAGAGCTATGCTGGAAACAGCATAGCAAGTTTAAATAAGGCTAGTCCGTTATCAACTTGAAAAAGTGGCACCGAGTCGGTGCTTTTTT
4|sgACADL_4|ACADL	TAAAATGGGATTAAAAGCCC	0	0	0	0	0	0	0	0	0	33	ACADL	ACADL	4|sg_hACADL_04|ACADL	ACADL	ACCGTAAAATGGGATTAAAAGCCCGTTTAAGAGCTATGCTGGAAACAGCATAGCAAGTTTAAATAAGGCTAGTCCGTTATCAACTTGAAAAAGTGGCACCGAGTCGGTGCTTTTTT
4|sgACADM_1|ACADM	AAGATGTGGATAACCAACGG	2	0	48423	1	0	1	1	1	2	34	ACADM	ACADM	4|sg_hACADM_01|ACADM	ACADM	ACCGAAGATGTGGATAACCAACGGGTTTAAGAGCTATGCTGGAAACAGCATAGCAAGTTTAAATAAGGCTAGTCCGTTATCAACTTGAAAAAGTGGCACCGAGTCGGTGCTTTTTT
4|sgACADM_2|ACADM	AATTGGCTTATGGATGTACA	0	0	0	0	0	0	0	0	0	34	ACADM	ACADM	4|sg_hACADM_02|ACADM	ACADM	ACCGAATTGGCTTATGGATGTACAGTTTAAGAGCTATGCTGGAAACAGCATAGCAAGTTTAAATAAGGCTAGTCCGTTATCAACTTGAAAAAGTGGCACCGAGTCGGTGCTTTTTT
4|sgACADM_3|ACADM	ATTGTGGAAGCAGATACCCC	0	0	0	0	0	0	0	0	0	34	ACADM	ACADM	4|sg_hACADM_03|ACADM	ACADM	ACCGATTGTGGAAGCAGATACCCCGTTTAAGAGCTATGCTGGAAACAGCATAGCAAGTTTAAATAAGGCTAGTCCGTTATCAACTTGAAAAAGTGGCACCGAGTCGGTGCTTTTTT
4|sgACADM_4|ACADM	GTATTTGGGGAGAATGACTG	0	0	0	0	0	0	0	0	0	34	ACADM	ACADM	4|sg_hACADM_04|ACADM	ACADM	ACCGGTATTTGGGGAGAATGACTGGTTTAAGAGCTATGCTGGAAACAGCATAGCAAGTTTAAATAAGGCTAGTCCGTTATCAACTTGAAAAAGTGGCACCGAGTCGGTGCTTTTTT
4|sgACADS_1|ACADS	ACACACCATCTACCAGTCTG	1	0	0	0	0	2	0	21602	0	35	ACADS	ACADS	4|sg_hACADS_01|ACADS	ACADS	ACCGACACACCATCTACCAGTCTGGTTTAAGAGCTATGCTGGAAACAGCATAGCAAGTTTAAATAAGGCTAGTCCGTTATCAACTTGAAAAAGTGGCACCGAGTCGGTGCTTTTTT
4|sgACADS_2|ACADS	GACACTCATGATGACTCCGG	0	0	1	0	0	0	0	0	0	35	ACADS	ACADS	4|sg_hACADS_02|ACADS	ACADS	ACCGGACACTCATGATGACTCCGGGTTTAAGAGCTATGCTGGAAACAGCATAGCAAGTTTAAATAAGGCTAGTCCGTTATCAACTTGAAAAAGTGGCACCGAGTCGGTGCTTTTTT
4|sgACADS_3|ACADS	GGCAGGTACCTGGTTCGCTG	0	0	0	0	0	0	0	0	0	35	ACADS	ACADS	4|sg_hACADS_03|ACADS	ACADS	ACCGGGCAGGTACCTGGTTCGCTGGTTTAAGAGCTATGCTGGAAACAGCATAGCAAGTTTAAATAAGGCTAGTCCGTTATCAACTTGAAAAAGTGGCACCGAGTCGGTGCTTTTTT
4|sgACADS_4|ACADS	TAAGGAACATCTCTTCCCAG	0	0	0	0	0	0	0	0	0	35	ACADS	ACADS	4|sg_hACADS_04|ACADS	ACADS	ACCGTAAGGAACATCTCTTCCCAGGTTTAAGAGCTATGCTGGAAACAGCATAGCAAGTTTAAATAAGGCTAGTCCGTTATCAACTTGAAAAAGTGGCACCGAGTCGGTGCTTTTTT
4|sgACADSB_1|ACADSB	AGCCAAAGTTGATGCATCTG	0	0	0	0	0	0	0	0	0	36	ACADSB	ACADSB	4|sg_hACADSB_01|ACADSB	ACADSB	ACCGAGCCAAAGTTGATGCATCTGGTTTAAGAGCTATGCTGGAAACAGCATAGCAAGTTTAAATAAGGCTAGTCCGTTATCAACTTGAAAAAGTGGCACCGAGTCGGTGCTTTTTT
4|sgACADSB_2|ACADSB	ATGGAGAAATCAGTAATACA	0	47788	0	0	0	0	0	4	7	36	ACADSB	ACADSB	4|sg_hACADSB_02|ACADSB	ACADSB	ACCGATGGAGAAATCAGTAATACAGTTTAAGAGCTATGCTGGAAACAGCATAGCAAGTTTAAATAAGGCTAGTCCGTTATCAACTTGAAAAAGTGGCACCGAGTCGGTGCTTTTTT
4|sgACADSB_3|ACADSB	ATTGAGTAGAGCTTCTGACT	0	0	0	0	0	0	0	0	0	36	ACADSB	ACADSB	4|sg_hACADSB_03|ACADSB	ACADSB	ACCGATTGAGTAGAGCTTCTGACTGTTTAAGAGCTATGCTGGAAACAGCATAGCAAGTTTAAATAAGGCTAGTCCGTTATCAACTTGAAAAAGTGGCACCGAGTCGGTGCTTTTTT
4|sgACADSB_4|ACADSB	TTCGAATGTTAACGGGCAGG	0	0	0	0	0	0	0	0	0	36	ACADSB	ACADSB	4|sg_hACADSB_04|ACADSB	ACADSB	ACCGTTCGAATGTTAACGGGCAGGGTTTAAGAGCTATGCTGGAAACAGCATAGCAAGTTTAAATAAGGCTAGTCCGTTATCAACTTGAAAAAGTGGCACCGAGTCGGTGCTTTTTT
4|sgACADVL_1|ACADVL	CACTAATCGTACCCAGTTTG	0	0	0	0	0	0	0	0	0	37	ACADVL	ACADVL	4|sg_hACADVL_01|ACADVL	ACADVL	ACCGCACTAATCGTACCCAGTTTGGTTTAAGAGCTATGCTGGAAACAGCATAGCAAGTTTAAATAAGGCTAGTCCGTTATCAACTTGAAAAAGTGGCACCGAGTCGGTGCTTTTTT
4|sgACADVL_2|ACADVL	GTCTAACCGAGCCCTCAAGC	0	0	0	0	0	0	0	0	0	37	ACADVL	ACADVL	4|sg_hACADVL_02|ACADVL	ACADVL	ACCGGTCTAACCGAGCCCTCAAGCGTTTAAGAGCTATGCTGGAAACAGCATAGCAAGTTTAAATAAGGCTAGTCCGTTATCAACTTGAAAAAGTGGCACCGAGTCGGTGCTTTTTT
4|sgACADVL_3|ACADVL	TCCTGGTCAGAGCGTCAGAG	0	0	0	0	0	0	0	0	0	37	ACADVL	ACADVL	4|sg_hACADVL_03|ACADVL	ACADVL	ACCGTCCTGGTCAGAGCGTCAGAGGTTTAAGAGCTATGCTGGAAACAGCATAGCAAGTTTAAATAAGGCTAGTCCGTTATCAACTTGAAAAAGTGGCACCGAGTCGGTGCTTTTTT
4|sgACADVL_4|ACADVL	TGTCTAACCGAGCCCTCAAG	0	0	0	0	0	0	0	0	0	37	ACADVL	ACADVL	4|sg_hACADVL_04|ACADVL	ACADVL	ACCGTGTCTAACCGAGCCCTCAAGGTTTAAGAGCTATGCTGGAAACAGCATAGCAAGTTTAAATAAGGCTAGTCCGTTATCAACTTGAAAAAGTGGCACCGAGTCGGTGCTTTTTT
4|sgACAN_1|ACAN	CAGCGGTCACCTGCACGACG	0	0	0	0	0	0	0	0	0	176	ACAN	ACAN	4|sg_hACAN_01|ACAN	ACAN	ACCGCAGCGGTCACCTGCACGACGGTTTAAGAGCTATGCTGGAAACAGCATAGCAAGTTTAAATAAGGCTAGTCCGTTATCAACTTGAAAAAGTGGCACCGAGTCGGTGCTTTTTT
4|sgACAN_2|ACAN	CCTGCGCTCCAATGACTCTG	0	0	0	0	0	0	0	0	0	176	ACAN	ACAN	4|sg_hACAN_02|ACAN	ACAN	ACCGCCTGCGCTCCAATGACTCTGGTTTAAGAGCTATGCTGGAAACAGCATAGCAAGTTTAAATAAGGCTAGTCCGTTATCAACTTGAAAAAGTGGCACCGAGTCGGTGCTTTTTT
4|sgACAN_3|ACAN	GAACCAGCCTATACCCCAGT	0	0	0	0	0	0	0	0	0	176	ACAN	ACAN	4|sg_hACAN_03|ACAN	ACAN	ACCGGAACCAGCCTATACCCCAGTGTTTAAGAGCTATGCTGGAAACAGCATAGCAAGTTTAAATAAGGCTAGTCCGTTATCAACTTGAAAAAGTGGCACCGAGTCGGTGCTTTTTT
4|sgACAN_4|ACAN	GAGGGCAGTTCACCAACCGT	0	0	0	0	0	0	0	0	0	176	ACAN	ACAN	4|sg_hACAN_04|ACAN	ACAN	ACCGGAGGGCAGTTCACCAACCGTGTTTAAGAGCTATGCTGGAAACAGCATAGCAAGTTTAAATAAGGCTAGTCCGTTATCAACTTGAAAAAGTGGCACCGAGTCGGTGCTTTTTT
4|sgACAP1_1|ACAP1	AGGTCTGCGGGGTTTCCGAG	0	0	0	0	0	0	0	0	0	9744	ACAP1	ACAP1	4|sg_hACAP1_01|ACAP1	ACAP1	ACCGAGGTCTGCGGGGTTTCCGAGGTTTAAGAGCTATGCTGGAAACAGCATAGCAAGTTTAAATAAGGCTAGTCCGTTATCAACTTGAAAAAGTGGCACCGAGTCGGTGCTTTTTT
4|sgACAP1_2|ACAP1	CAGAACCAAGCTTAAGAGAG	13295	0	0	0	0	0	1	2	0	9744	ACAP1	ACAP1	4|sg_hACAP1_02|ACAP1	ACAP1	ACCGCAGAACCAAGCTTAAGAGAGGTTTAAGAGCTATGCTGGAAACAGCATAGCAAGTTTAAATAAGGCTAGTCCGTTATCAACTTGAAAAAGTGGCACCGAGTCGGTGCTTTTTT
4|sgACAP1_3|ACAP1	GTCACAAATGCCGACAACGA	0	0	0	0	0	0	0	0	0	9744	ACAP1	ACAP1	4|sg_hACAP1_03|ACAP1	ACAP1	ACCGGTCACAAATGCCGACAACGAGTTTAAGAGCTATGCTGGAAACAGCATAGCAAGTTTAAATAAGGCTAGTCCGTTATCAACTTGAAAAAGTGGCACCGAGTCGGTGCTTTTTT
4|sgACAP1_4|ACAP1	TGCCGGAACACTGAATGCAG	13	9	1	17	4	2	72091	3	96481	9744	ACAP1	ACAP1	4|sg_hACAP1_04|ACAP1	ACAP1	ACCGTGCCGGAACACTGAATGCAGGTTTAAGAGCTATGCTGGAAACAGCATAGCAAGTTTAAATAAGGCTAGTCCGTTATCAACTTGAAAAAGTGGCACCGAGTCGGTGCTTTTTT
4|sgACAP2_1|ACAP2	ACTATAGGATAATCCGACTG	0	0	0	0	0	0	0	0	0	23527	ACAP2	ACAP2	4|sg_hACAP2_01|ACAP2	ACAP2	ACCGACTATAGGATAATCCGACTGGTTTAAGAGCTATGCTGGAAACAGCATAGCAAGTTTAAATAAGGCTAGTCCGTTATCAACTTGAAAAAGTGGCACCGAGTCGGTGCTTTTTT
4|sgACAP2_2|ACAP2	ATATATCAGAGCAAAATATG	0	0	0	0	0	0	0	0	1	23527	ACAP2	ACAP2	4|sg_hACAP2_02|ACAP2	ACAP2	ACCGATATATCAGAGCAAAATATGGTTTAAGAGCTATGCTGGAAACAGCATAGCAAGTTTAAATAAGGCTAGTCCGTTATCAACTTGAAAAAGTGGCACCGAGTCGGTGCTTTTTT
4|sgACAP2_3|ACAP2	TCCGGAGCACTCGATACACA	0	0	0	0	0	0	0	0	0	23527	ACAP2	ACAP2	4|sg_hACAP2_03|ACAP2	ACAP2	ACCGTCCGGAGCACTCGATACACAGTTTAAGAGCTATGCTGGAAACAGCATAGCAAGTTTAAATAAGGCTAGTCCGTTATCAACTTGAAAAAGTGGCACCGAGTCGGTGCTTTTTT
4|sgACAP2_4|ACAP2	TGAACTTGGACCCTACATGA	0	0	0	0	0	0	0	0	0	23527	ACAP2	ACAP2	4|sg_hACAP2_04|ACAP2	ACAP2	ACCGTGAACTTGGACCCTACATGAGTTTAAGAGCTATGCTGGAAACAGCATAGCAAGTTTAAATAAGGCTAGTCCGTTATCAACTTGAAAAAGTGGCACCGAGTCGGTGCTTTTTT
4|sgACAP3_1|ACAP3	CCTCGCTATAGCAACTGTCA	0	0	0	0	0	0	0	0	0	116983	ACAP3	ACAP3	4|sg_hACAP3_01|ACAP3	ACAP3	ACCGCCTCGCTATAGCAACTGTCAGTTTAAGAGCTATGCTGGAAACAGCATAGCAAGTTTAAATAAGGCTAGTCCGTTATCAACTTGAAAAAGTGGCACCGAGTCGGTGCTTTTTT
4|sgACAP3_2|ACAP3	CTCCACTTTGGACTCATCGT	0	0	0	0	0	0	0	0	0	116983	ACAP3	ACAP3	4|sg_hACAP3_02|ACAP3	ACAP3	ACCGCTCCACTTTGGACTCATCGTGTTTAAGAGCTATGCTGGAAACAGCATAGCAAGTTTAAATAAGGCTAGTCCGTTATCAACTTGAAAAAGTGGCACCGAGTCGGTGCTTTTTT
4|sgACAP3_3|ACAP3	CTGGATCAAGGACAAATACG	0	0	0	0	0	0	0	0	0	116983	ACAP3	ACAP3	4|sg_hACAP3_03|ACAP3	ACAP3	ACCGCTGGATCAAGGACAAATACGGTTTAAGAGCTATGCTGGAAACAGCATAGCAAGTTTAAATAAGGCTAGTCCGTTATCAACTTGAAAAAGTGGCACCGAGTCGGTGCTTTTTT
4|sgACAP3_4|ACAP3	GTTCGCTGACAGCCTACAGG	0	0	0	0	0	0	1	11358	0	116983	ACAP3	ACAP3	4|sg_hACAP3_04|ACAP3	ACAP3	ACCGGTTCGCTGACAGCCTACAGGGTTTAAGAGCTATGCTGGAAACAGCATAGCAAGTTTAAATAAGGCTAGTCCGTTATCAACTTGAAAAAGTGGCACCGAGTCGGTGCTTTTTT
4|sgACAT1_1|ACAT1	CTGCCTAAAAAAGATCCAAT	0	0	0	0	0	0	0	0	0	38	ACAT1	ACAT1	4|sg_hACAT1_01|ACAT1	ACAT1	ACCGCTGCCTAAAAAAGATCCAATGTTTAAGAGCTATGCTGGAAACAGCATAGCAAGTTTAAATAAGGCTAGTCCGTTATCAACTTGAAAAAGTGGCACCGAGTCGGTGCTTTTTT
4|sgACAT1_2|ACAT1	GAAGTGAAAGAAGCATACAT	0	0	0	0	0	0	0	0	0	38	ACAT1	ACAT1	4|sg_hACAT1_02|ACAT1	ACAT1	ACCGGAAGTGAAAGAAGCATACATGTTTAAGAGCTATGCTGGAAACAGCATAGCAAGTTTAAATAAGGCTAGTCCGTTATCAACTTGAAAAAGTGGCACCGAGTCGGTGCTTTTTT
4|sgACAT1_3|ACAT1	GAGGATCAACACCATATGGT	0	0	0	0	0	0	0	0	0	38	ACAT1	ACAT1	4|sg_hACAT1_03|ACAT1	ACAT1	ACCGGAGGATCAACACCATATGGTGTTTAAGAGCTATGCTGGAAACAGCATAGCAAGTTTAAATAAGGCTAGTCCGTTATCAACTTGAAAAAGTGGCACCGAGTCGGTGCTTTTTT
4|sgACAT1_4|ACAT1	TTCTGCGCAGGATGTGATGG	0	0	0	0	0	0	0	0	0	38	ACAT1	ACAT1	4|sg_hACAT1_04|ACAT1	ACAT1	ACCGTTCTGCGCAGGATGTGATGGGTTTAAGAGCTATGCTGGAAACAGCATAGCAAGTTTAAATAAGGCTAGTCCGTTATCAACTTGAAAAAGTGGCACCGAGTCGGTGCTTTTTT
4|sgACAT2_1|ACAT2	CCTGTTAGACAAGCCAGTGT	0	0	0	0	0	0	0	0	0	39	ACAT2	ACAT2	4|sg_hACAT2_01|ACAT2	ACAT2	ACCGCCTGTTAGACAAGCCAGTGTGTTTAAGAGCTATGCTGGAAACAGCATAGCAAGTTTAAATAAGGCTAGTCCGTTATCAACTTGAAAAAGTGGCACCGAGTCGGTGCTTTTTT
4|sgACAT2_2|ACAT2	GCAGTCCAGTCAATAGGGAT	0	0	0	0	0	0	0	0	0	39	ACAT2	ACAT2	4|sg_hACAT2_02|ACAT2	ACAT2	ACCGGCAGTCCAGTCAATAGGGATGTTTAAGAGCTATGCTGGAAACAGCATAGCAAGTTTAAATAAGGCTAGTCCGTTATCAACTTGAAAAAGTGGCACCGAGTCGGTGCTTTTTT
4|sgACAT2_3|ACAT2	GTTCTCAAGTAAGCCAAGTG	0	0	6674	1	0	0	0	0	0	39	ACAT2	ACAT2	4|sg_hACAT2_03|ACAT2	ACAT2	ACCGGTTCTCAAGTAAGCCAAGTGGTTTAAGAGCTATGCTGGAAACAGCATAGCAAGTTTAAATAAGGCTAGTCCGTTATCAACTTGAAAAAGTGGCACCGAGTCGGTGCTTTTTT
4|sgACAT2_4|ACAT2	TCTATGTTGCTCCCATGGCG	0	0	0	0	0	0	0	0	0	39	ACAT2	ACAT2	4|sg_hACAT2_04|ACAT2	ACAT2	ACCGTCTATGTTGCTCCCATGGCGGTTTAAGAGCTATGCTGGAAACAGCATAGCAAGTTTAAATAAGGCTAGTCCGTTATCAACTTGAAAAAGTGGCACCGAGTCGGTGCTTTTTT
4|sgACBD3_1|ACBD3	AAGAGAACGTCTGCAAAAGG	0	0	0	0	0	0	0	0	0	64746	ACBD3	ACBD3	4|sg_hACBD3_01|ACBD3	ACBD3	ACCGAAGAGAACGTCTGCAAAAGGGTTTAAGAGCTATGCTGGAAACAGCATAGCAAGTTTAAATAAGGCTAGTCCGTTATCAACTTGAAAAAGTGGCACCGAGTCGGTGCTTTTTT
4|sgACBD3_2|ACBD3	ACATCAAAGAATCCAACCTC	0	0	0	0	0	0	0	0	0	64746	ACBD3	ACBD3	4|sg_hACBD3_02|ACBD3	ACBD3	ACCGACATCAAAGAATCCAACCTCGTTTAAGAGCTATGCTGGAAACAGCATAGCAAGTTTAAATAAGGCTAGTCCGTTATCAACTTGAAAAAGTGGCACCGAGTCGGTGCTTTTTT
4|sgACBD3_3|ACBD3	GGGCCGCGACCGGATCCAGG	0	0	0	0	0	0	0	0	0	64746	ACBD3	ACBD3	4|sg_hACBD3_03|ACBD3	ACBD3	ACCGGGGCCGCGACCGGATCCAGGGTTTAAGAGCTATGCTGGAAACAGCATAGCAAGTTTAAATAAGGCTAGTCCGTTATCAACTTGAAAAAGTGGCACCGAGTCGGTGCTTTTTT
4|sgACBD3_4|ACBD3	TGCGTCCCACAAAATAGAGA	0	0	0	0	0	0	0	0	0	64746	ACBD3	ACBD3	4|sg_hACBD3_04|ACBD3	ACBD3	ACCGTGCGTCCCACAAAATAGAGAGTTTAAGAGCTATGCTGGAAACAGCATAGCAAGTTTAAATAAGGCTAGTCCGTTATCAACTTGAAAAAGTGGCACCGAGTCGGTGCTTTTTT
4|sgACBD4_1|ACBD4	ACCACTTATATCGTCCAATG	0	0	2	0	66892	1	1	3	1	79777	ACBD4	ACBD4	4|sg_hACBD4_01|ACBD4	ACBD4	ACCGACCACTTATATCGTCCAATGGTTTAAGAGCTATGCTGGAAACAGCATAGCAAGTTTAAATAAGGCTAGTCCGTTATCAACTTGAAAAAGTGGCACCGAGTCGGTGCTTTTTT
4|sgACBD4_2|ACBD4	AGGTGATCCCTGACATGCCG	0	0	0	0	0	0	0	0	0	79777	ACBD4	ACBD4	4|sg_hACBD4_02|ACBD4	ACBD4	ACCGAGGTGATCCCTGACATGCCGGTTTAAGAGCTATGCTGGAAACAGCATAGCAAGTTTAAATAAGGCTAGTCCGTTATCAACTTGAAAAAGTGGCACCGAGTCGGTGCTTTTTT
4|sgACBD4_3|ACBD4	CAGGGAATCACAGAAAACCT	0	0	0	0	0	0	0	0	0	79777	ACBD4	ACBD4	4|sg_hACBD4_03|ACBD4	ACBD4	ACCGCAGGGAATCACAGAAAACCTGTTTAAGAGCTATGCTGGAAACAGCATAGCAAGTTTAAATAAGGCTAGTCCGTTATCAACTTGAAAAAGTGGCACCGAGTCGGTGCTTTTTT
4|sgACBD4_4|ACBD4	GTGATCGACACAGTGCCCCT	0	0	0	0	0	0	0	0	1	79777	ACBD4	ACBD4	4|sg_hACBD4_04|ACBD4	ACBD4	ACCGGTGATCGACACAGTGCCCCTGTTTAAGAGCTATGCTGGAAACAGCATAGCAAGTTTAAATAAGGCTAGTCCGTTATCAACTTGAAAAAGTGGCACCGAGTCGGTGCTTTTTT
4|sgACBD5_1|ACBD5	ACTGGGTGATATGACCAAAG	0	0	0	0	0	0	0	0	0	91452	ACBD5	ACBD5	4|sg_hACBD5_01|ACBD5	ACBD5	ACCGACTGGGTGATATGACCAAAGGTTTAAGAGCTATGCTGGAAACAGCATAGCAAGTTTAAATAAGGCTAGTCCGTTATCAACTTGAAAAAGTGGCACCGAGTCGGTGCTTTTTT
4|sgACBD5_2|ACBD5	AGCCCATTGATGAAAACTTG	0	0	0	0	0	0	0	0	0	91452	ACBD5	ACBD5	4|sg_hACBD5_02|ACBD5	ACBD5	ACCGAGCCCATTGATGAAAACTTGGTTTAAGAGCTATGCTGGAAACAGCATAGCAAGTTTAAATAAGGCTAGTCCGTTATCAACTTGAAAAAGTGGCACCGAGTCGGTGCTTTTTT
4|sgACBD5_3|ACBD5	AGGTAAAATAGTCCAACCTG	0	0	7265	0	0	0	0	1	1	91452	ACBD5	ACBD5	4|sg_hACBD5_03|ACBD5	ACBD5	ACCGAGGTAAAATAGTCCAACCTGGTTTAAGAGCTATGCTGGAAACAGCATAGCAAGTTTAAATAAGGCTAGTCCGTTATCAACTTGAAAAAGTGGCACCGAGTCGGTGCTTTTTT
4|sgACBD5_4|ACBD5	TGGTCATTCCAGTCAACCCA	0	0	0	0	0	0	0	0	0	91452	ACBD5	ACBD5	4|sg_hACBD5_04|ACBD5	ACBD5	ACCGTGGTCATTCCAGTCAACCCAGTTTAAGAGCTATGCTGGAAACAGCATAGCAAGTTTAAATAAGGCTAGTCCGTTATCAACTTGAAAAAGTGGCACCGAGTCGGTGCTTTTTT
4|sgACBD6_1|ACBD6	AAATATATTTGATTACTGCA	0	0	0	0	0	0	0	0	0	84320	ACBD6	ACBD6	4|sg_hACBD6_01|ACBD6	ACBD6	ACCGAAATATATTTGATTACTGCAGTTTAAGAGCTATGCTGGAAACAGCATAGCAAGTTTAAATAAGGCTAGTCCGTTATCAACTTGAAAAAGTGGCACCGAGTCGGTGCTTTTTT
4|sgACBD6_2|ACBD6	AGCCATCAAATCGAAAAATG	0	0	0	0	0	0	0	0	0	84320	ACBD6	ACBD6	4|sg_hACBD6_02|ACBD6	ACBD6	ACCGAGCCATCAAATCGAAAAATGGTTTAAGAGCTATGCTGGAAACAGCATAGCAAGTTTAAATAAGGCTAGTCCGTTATCAACTTGAAAAAGTGGCACCGAGTCGGTGCTTTTTT
4|sgACBD6_3|ACBD6	CCTCGATCTCAGGGCTATGG	0	0	0	0	0	0	0	0	0	84320	ACBD6	ACBD6	4|sg_hACBD6_03|ACBD6	ACBD6	ACCGCCTCGATCTCAGGGCTATGGGTTTAAGAGCTATGCTGGAAACAGCATAGCAAGTTTAAATAAGGCTAGTCCGTTATCAACTTGAAAAAGTGGCACCGAGTCGGTGCTTTTTT
4|sgACBD6_4|ACBD6	TTAAAAAACTAGATCCAGGT	0	0	0	0	0	0	0	0	0	84320	ACBD6	ACBD6	4|sg_hACBD6_04|ACBD6	ACBD6	ACCGTTAAAAAACTAGATCCAGGTGTTTAAGAGCTATGCTGGAAACAGCATAGCAAGTTTAAATAAGGCTAGTCCGTTATCAACTTGAAAAAGTGGCACCGAGTCGGTGCTTTTTT
4|sgACBD7_1|ACBD7	ACAGGGCTGCAGAAGATGTG	0	0	0	0	0	0	0	0	0	414149	ACBD7	ACBD7	4|sg_hACBD7_01|ACBD7	ACBD7	ACCGACAGGGCTGCAGAAGATGTGGTTTAAGAGCTATGCTGGAAACAGCATAGCAAGTTTAAATAAGGCTAGTCCGTTATCAACTTGAAAAAGTGGCACCGAGTCGGTGCTTTTTT
4|sgACBD7_2|ACBD7	CTGAAAGCAAGACCAGATGA	0	0	0	0	0	0	0	0	0	414149	ACBD7	ACBD7	4|sg_hACBD7_02|ACBD7	ACBD7	ACCGCTGAAAGCAAGACCAGATGAGTTTAAGAGCTATGCTGGAAACAGCATAGCAAGTTTAAATAAGGCTAGTCCGTTATCAACTTGAAAAAGTGGCACCGAGTCGGTGCTTTTTT
4|sgACBD7_3|ACBD7	GAGAACTGAAAGAACTCTAT	0	0	0	0	0	0	0	0	0	414149	ACBD7	ACBD7	4|sg_hACBD7_03|ACBD7	ACBD7	ACCGGAGAACTGAAAGAACTCTATGTTTAAGAGCTATGCTGGAAACAGCATAGCAAGTTTAAATAAGGCTAGTCCGTTATCAACTTGAAAAAGTGGCACCGAGTCGGTGCTTTTTT
4|sgACBD7_4|ACBD7	GCAAAGCCAAATGGGAAGCA	0	0	0	0	0	0	0	0	0	414149	ACBD7	ACBD7	4|sg_hACBD7_04|ACBD7	ACBD7	ACCGGCAAAGCCAAATGGGAAGCAGTTTAAGAGCTATGCTGGAAACAGCATAGCAAGTTTAAATAAGGCTAGTCCGTTATCAACTTGAAAAAGTGGCACCGAGTCGGTGCTTTTTT
4|sgACCS_1|ACCS	CCCAACAGACTTCTCAAACA	0	0	0	0	0	0	0	0	0	84680	ACCS	ACCS	4|sg_hACCS_01|ACCS	ACCS	ACCGCCCAACAGACTTCTCAAACAGTTTAAGAGCTATGCTGGAAACAGCATAGCAAGTTTAAATAAGGCTAGTCCGTTATCAACTTGAAAAAGTGGCACCGAGTCGGTGCTTTTTT
4|sgACCS_2|ACCS	GGGGAGTATACATCACCCAG	0	0	0	0	0	0	0	0	0	84680	ACCS	ACCS	4|sg_hACCS_02|ACCS	ACCS	ACCGGGGGAGTATACATCACCCAGGTTTAAGAGCTATGCTGGAAACAGCATAGCAAGTTTAAATAAGGCTAGTCCGTTATCAACTTGAAAAAGTGGCACCGAGTCGGTGCTTTTTT
4|sgACCS_3|ACCS	TAGGTGGTTGTCCTGAATGG	0	0	0	0	0	0	0	0	0	84680	ACCS	ACCS	4|sg_hACCS_03|ACCS	ACCS	ACCGTAGGTGGTTGTCCTGAATGGGTTTAAGAGCTATGCTGGAAACAGCATAGCAAGTTTAAATAAGGCTAGTCCGTTATCAACTTGAAAAAGTGGCACCGAGTCGGTGCTTTTTT
4|sgACCS_4|ACCS	TGTGATAGCGCCATAGTAAG	1	0	2	0	0	1	1	11870	0	84680	ACCS	ACCS	4|sg_hACCS_04|ACCS	ACCS	ACCGTGTGATAGCGCCATAGTAAGGTTTAAGAGCTATGCTGGAAACAGCATAGCAAGTTTAAATAAGGCTAGTCCGTTATCAACTTGAAAAAGTGGCACCGAGTCGGTGCTTTTTT
4|sgACCSL_1|ACCSL	AAGTGACATGAACTGCATTG	0	0	0	0	0	0	0	0	0	390110	ACCSL	ACCSL	4|sg_hACCSL_01|ACCSL	ACCSL	ACCGAAGTGACATGAACTGCATTGGTTTAAGAGCTATGCTGGAAACAGCATAGCAAGTTTAAATAAGGCTAGTCCGTTATCAACTTGAAAAAGTGGCACCGAGTCGGTGCTTTTTT
4|sgACCSL_2|ACCSL	GATCAACCTCCTACAGTCTG	0	0	0	0	0	0	0	0	0	390110	ACCSL	ACCSL	4|sg_hACCSL_02|ACCSL	ACCSL	ACCGGATCAACCTCCTACAGTCTGGTTTAAGAGCTATGCTGGAAACAGCATAGCAAGTTTAAATAAGGCTAGTCCGTTATCAACTTGAAAAAGTGGCACCGAGTCGGTGCTTTTTT
4|sgACCSL_3|ACCSL	TCCCACGGATGGATAGGTCG	0	0	0	0	0	0	0	0	0	390110	ACCSL	ACCSL	4|sg_hACCSL_03|ACCSL	ACCSL	ACCGTCCCACGGATGGATAGGTCGGTTTAAGAGCTATGCTGGAAACAGCATAGCAAGTTTAAATAAGGCTAGTCCGTTATCAACTTGAAAAAGTGGCACCGAGTCGGTGCTTTTTT
4|sgACCSL_4|ACCSL	TCTTAGGGGAAAAAGGTCCG	0	0	0	0	0	0	0	0	0	390110	ACCSL	ACCSL	4|sg_hACCSL_04|ACCSL	ACCSL	ACCGTCTTAGGGGAAAAAGGTCCGGTTTAAGAGCTATGCTGGAAACAGCATAGCAAGTTTAAATAAGGCTAGTCCGTTATCAACTTGAAAAAGTGGCACCGAGTCGGTGCTTTTTT
4|sgACD_1|ACD	AAGCAGCGTGGCCCCGACGT	0	0	7724	0	0	0	0	0	0	65057	ACD	ACD	4|sg_hACD_01|ACD	ACD	ACCGAAGCAGCGTGGCCCCGACGTGTTTAAGAGCTATGCTGGAAACAGCATAGCAAGTTTAAATAAGGCTAGTCCGTTATCAACTTGAAAAAGTGGCACCGAGTCGGTGCTTTTTT
4|sgACD_2|ACD	AGATGCACAGCATTGAGCTG	18709	0	0	0	1	0	0	0	0	65057	ACD	ACD	4|sg_hACD_02|ACD	ACD	ACCGAGATGCACAGCATTGAGCTGGTTTAAGAGCTATGCTGGAAACAGCATAGCAAGTTTAAATAAGGCTAGTCCGTTATCAACTTGAAAAAGTGGCACCGAGTCGGTGCTTTTTT
4|sgACD_3|ACD	ATCCGCTGGGTGTAGCCGTG	0	0	0	0	0	0	0	0	0	65057	ACD	ACD	4|sg_hACD_03|ACD	ACD	ACCGATCCGCTGGGTGTAGCCGTGGTTTAAGAGCTATGCTGGAAACAGCATAGCAAGTTTAAATAAGGCTAGTCCGTTATCAACTTGAAAAAGTGGCACCGAGTCGGTGCTTTTTT
4|sgACD_4|ACD	GCTTCTGGATGAAATGCGGG	0	0	0	0	0	0	0	0	0	65057	ACD	ACD	4|sg_hACD_04|ACD	ACD	ACCGGCTTCTGGATGAAATGCGGGGTTTAAGAGCTATGCTGGAAACAGCATAGCAAGTTTAAATAAGGCTAGTCCGTTATCAACTTGAAAAAGTGGCACCGAGTCGGTGCTTTTTT
4|sgACE_1|ACE	GGAAAACATCTACGACATGG	0	0	0	0	0	0	0	0	0	1636	ACE	ACE	4|sg_hACE_01|ACE	ACE	ACCGGGAAAACATCTACGACATGGGTTTAAGAGCTATGCTGGAAACAGCATAGCAAGTTTAAATAAGGCTAGTCCGTTATCAACTTGAAAAAGTGGCACCGAGTCGGTGCTTTTTT
4|sgACE_2|ACE	GGTGTGGAACGAGTATGCCG	0	0	0	0	0	0	0	0	0	1636	ACE	ACE	4|sg_hACE_02|ACE	ACE	ACCGGGTGTGGAACGAGTATGCCGGTTTAAGAGCTATGCTGGAAACAGCATAGCAAGTTTAAATAAGGCTAGTCCGTTATCAACTTGAAAAAGTGGCACCGAGTCGGTGCTTTTTT
4|sgACE_3|ACE	GTTGTAGAAGTCCCAAGCCG	0	0	0	0	0	0	0	0	0	1636	ACE	ACE	4|sg_hACE_03|ACE	ACE	ACCGGTTGTAGAAGTCCCAAGCCGGTTTAAGAGCTATGCTGGAAACAGCATAGCAAGTTTAAATAAGGCTAGTCCGTTATCAACTTGAAAAAGTGGCACCGAGTCGGTGCTTTTTT
4|sgACE_4|ACE	GTTTCGTTTCGGGTAACAGG	0	0	0	0	0	0	0	0	0	1636	ACE	ACE	4|sg_hACE_04|ACE	ACE	ACCGGTTTCGTTTCGGGTAACAGGGTTTAAGAGCTATGCTGGAAACAGCATAGCAAGTTTAAATAAGGCTAGTCCGTTATCAACTTGAAAAAGTGGCACCGAGTCGGTGCTTTTTT
4|sgACE2_1|ACE2	AACATCTTCATGCCTATGTG	0	0	0	0	0	0	0	0	0	59272	ACE2	ACE2	4|sg_hACE2_01|ACE2	ACE2	ACCGAACATCTTCATGCCTATGTGGTTTAAGAGCTATGCTGGAAACAGCATAGCAAGTTTAAATAAGGCTAGTCCGTTATCAACTTGAAAAAGTGGCACCGAGTCGGTGCTTTTTT
4|sgACE2_2|ACE2	CAGGATCCTTATGTGCACAA	0	0	0	0	0	0	0	0	0	59272	ACE2	ACE2	4|sg_hACE2_02|ACE2	ACE2	ACCGCAGGATCCTTATGTGCACAAGTTTAAGAGCTATGCTGGAAACAGCATAGCAAGTTTAAATAAGGCTAGTCCGTTATCAACTTGAAAAAGTGGCACCGAGTCGGTGCTTTTTT
4|sgACE2_3|ACE2	CCAAAGGCGAGAGATAGTTG	0	0	0	0	0	0	0	0	0	59272	ACE2	ACE2	4|sg_hACE2_03|ACE2	ACE2	ACCGCCAAAGGCGAGAGATAGTTGGTTTAAGAGCTATGCTGGAAACAGCATAGCAAGTTTAAATAAGGCTAGTCCGTTATCAACTTGAAAAAGTGGCACCGAGTCGGTGCTTTTTT
4|sgACE2_4|ACE2	TGCACAGAGAATATTCAAGG	0	0	0	0	0	0	0	0	0	59272	ACE2	ACE2	4|sg_hACE2_04|ACE2	ACE2	ACCGTGCACAGAGAATATTCAAGGGTTTAAGAGCTATGCTGGAAACAGCATAGCAAGTTTAAATAAGGCTAGTCCGTTATCAACTTGAAAAAGTGGCACCGAGTCGGTGCTTTTTT
4|sgACER1_1|ACER1	CCCAGACAACGTAAATGTAG	0	0	0	0	0	0	0	0	0	125981	ACER1	ACER1	4|sg_hACER1_01|ACER1	ACER1	ACCGCCCAGACAACGTAAATGTAGGTTTAAGAGCTATGCTGGAAACAGCATAGCAAGTTTAAATAAGGCTAGTCCGTTATCAACTTGAAAAAGTGGCACCGAGTCGGTGCTTTTTT
4|sgACER1_2|ACER1	GAAGACCAGGCGGATGAACT	0	0	0	0	0	0	0	0	0	125981	ACER1	ACER1	4|sg_hACER1_02|ACER1	ACER1	ACCGGAAGACCAGGCGGATGAACTGTTTAAGAGCTATGCTGGAAACAGCATAGCAAGTTTAAATAAGGCTAGTCCGTTATCAACTTGAAAAAGTGGCACCGAGTCGGTGCTTTTTT
4|sgACER1_3|ACER1	GGTGGCCGAGTTCTACAACA	0	0	0	0	0	0	0	0	0	125981	ACER1	ACER1	4|sg_hACER1_03|ACER1	ACER1	ACCGGGTGGCCGAGTTCTACAACAGTTTAAGAGCTATGCTGGAAACAGCATAGCAAGTTTAAATAAGGCTAGTCCGTTATCAACTTGAAAAAGTGGCACCGAGTCGGTGCTTTTTT
4|sgACER1_4|ACER1	TGGACGAGATCGCCATCCTG	0	0	0	0	0	0	0	0	0	125981	ACER1	ACER1	4|sg_hACER1_04|ACER1	ACER1	ACCGTGGACGAGATCGCCATCCTGGTTTAAGAGCTATGCTGGAAACAGCATAGCAAGTTTAAATAAGGCTAGTCCGTTATCAACTTGAAAAAGTGGCACCGAGTCGGTGCTTTTTT
4|sgACER2_1|ACER2	ATACCTTCTGGGGAACCACA	0	0	0	0	0	0	0	0	0	340485	ACER2	ACER2	4|sg_hACER2_01|ACER2	ACER2	ACCGATACCTTCTGGGGAACCACAGTTTAAGAGCTATGCTGGAAACAGCATAGCAAGTTTAAATAAGGCTAGTCCGTTATCAACTTGAAAAAGTGGCACCGAGTCGGTGCTTTTTT
4|sgACER2_2|ACER2	ATTCAGGGGTAGGTTCAAGG	0	0	0	0	0	0	0	0	0	340485	ACER2	ACER2	4|sg_hACER2_02|ACER2	ACER2	ACCGATTCAGGGGTAGGTTCAAGGGTTTAAGAGCTATGCTGGAAACAGCATAGCAAGTTTAAATAAGGCTAGTCCGTTATCAACTTGAAAAAGTGGCACCGAGTCGGTGCTTTTTT
4|sgACER2_3|ACER2	CATCTGACCCAAGAAACTAA	0	0	0	0	0	0	0	0	0	340485	ACER2	ACER2	4|sg_hACER2_03|ACER2	ACER2	ACCGCATCTGACCCAAGAAACTAAGTTTAAGAGCTATGCTGGAAACAGCATAGCAAGTTTAAATAAGGCTAGTCCGTTATCAACTTGAAAAAGTGGCACCGAGTCGGTGCTTTTTT
4|sgACER2_4|ACER2	TATCGCCGAGTTCTACAACA	0	0	0	0	0	0	0	0	0	340485	ACER2	ACER2	4|sg_hACER2_04|ACER2	ACER2	ACCGTATCGCCGAGTTCTACAACAGTTTAAGAGCTATGCTGGAAACAGCATAGCAAGTTTAAATAAGGCTAGTCCGTTATCAACTTGAAAAAGTGGCACCGAGTCGGTGCTTTTTT
4|sgACER3_1|ACER3	AAAAGAGCCGATATTCCATC	0	0	0	0	0	0	0	0	0	55331	ACER3	ACER3	4|sg_hACER3_01|ACER3	ACER3	ACCGAAAAGAGCCGATATTCCATCGTTTAAGAGCTATGCTGGAAACAGCATAGCAAGTTTAAATAAGGCTAGTCCGTTATCAACTTGAAAAAGTGGCACCGAGTCGGTGCTTTTTT
4|sgACER3_2|ACER3	CTCGGCGATGTACCAGGTCA	0	0	0	0	0	0	0	0	0	55331	ACER3	ACER3	4|sg_hACER3_02|ACER3	ACER3	ACCGCTCGGCGATGTACCAGGTCAGTTTAAGAGCTATGCTGGAAACAGCATAGCAAGTTTAAATAAGGCTAGTCCGTTATCAACTTGAAAAAGTGGCACCGAGTCGGTGCTTTTTT
4|sgACER3_3|ACER3	TAAGCCATGGATAAACCCTG	1	0	0	0	0	0	0	0	0	55331	ACER3	ACER3	4|sg_hACER3_03|ACER3	ACER3	ACCGTAAGCCATGGATAAACCCTGGTTTAAGAGCTATGCTGGAAACAGCATAGCAAGTTTAAATAAGGCTAGTCCGTTATCAACTTGAAAAAGTGGCACCGAGTCGGTGCTTTTTT
4|sgACER3_4|ACER3	TATTAAACTGAATAGAACTA	0	0	0	0	0	0	0	0	0	55331	ACER3	ACER3	4|sg_hACER3_04|ACER3	ACER3	ACCGTATTAAACTGAATAGAACTAGTTTAAGAGCTATGCTGGAAACAGCATAGCAAGTTTAAATAAGGCTAGTCCGTTATCAACTTGAAAAAGTGGCACCGAGTCGGTGCTTTTTT
4|sgACHE_1|ACHE	GGTGTCCATGAACTACCGGG	0	0	0	0	0	0	0	0	0	43	ACHE	ACHE	4|sg_hACHE_01|ACHE	ACHE	ACCGGGTGTCCATGAACTACCGGGGTTTAAGAGCTATGCTGGAAACAGCATAGCAAGTTTAAATAAGGCTAGTCCGTTATCAACTTGAAAAAGTGGCACCGAGTCGGTGCTTTTTT
4|sgACHE_2|ACHE	TATGTGGACACCCTATACCC	0	0	0	0	0	0	0	0	0	43	ACHE	ACHE	4|sg_hACHE_02|ACHE	ACHE	ACCGTATGTGGACACCCTATACCCGTTTAAGAGCTATGCTGGAAACAGCATAGCAAGTTTAAATAAGGCTAGTCCGTTATCAACTTGAAAAAGTGGCACCGAGTCGGTGCTTTTTT
4|sgACHE_3|ACHE	TGGTGGGAATGACACAGAGC	0	0	0	0	0	0	0	0	0	43	ACHE	ACHE	4|sg_hACHE_03|ACHE	ACHE	ACCGTGGTGGGAATGACACAGAGCGTTTAAGAGCTATGCTGGAAACAGCATAGCAAGTTTAAATAAGGCTAGTCCGTTATCAACTTGAAAAAGTGGCACCGAGTCGGTGCTTTTTT
4|sgACHE_4|ACHE	TGTCCTCGTCTGGATCTATG	0	0	0	0	0	0	0	0	0	43	ACHE	ACHE	4|sg_hACHE_04|ACHE	ACHE	ACCGTGTCCTCGTCTGGATCTATGGTTTAAGAGCTATGCTGGAAACAGCATAGCAAGTTTAAATAAGGCTAGTCCGTTATCAACTTGAAAAAGTGGCACCGAGTCGGTGCTTTTTT
4|sgACIN1_1|ACIN1	CCTGGTCAAGCGGCTCAAAG	0	0	0	0	0	0	0	0	0	22985	ACIN1	ACIN1	4|sg_hACIN1_01|ACIN1	ACIN1	ACCGCCTGGTCAAGCGGCTCAAAGGTTTAAGAGCTATGCTGGAAACAGCATAGCAAGTTTAAATAAGGCTAGTCCGTTATCAACTTGAAAAAGTGGCACCGAGTCGGTGCTTTTTT
4|sgACIN1_2|ACIN1	CGTACTCATGCCAACCCTCG	0	0	0	0	0	0	0	0	0	22985	ACIN1	ACIN1	4|sg_hACIN1_02|ACIN1	ACIN1	ACCGCGTACTCATGCCAACCCTCGGTTTAAGAGCTATGCTGGAAACAGCATAGCAAGTTTAAATAAGGCTAGTCCGTTATCAACTTGAAAAAGTGGCACCGAGTCGGTGCTTTTTT
4|sgACIN1_3|ACIN1	GAGGAATTAGCACTGGCCAA	0	0	0	0	21	0	0	0	0	22985	ACIN1	ACIN1	4|sg_hACIN1_03|ACIN1	ACIN1	ACCGGAGGAATTAGCACTGGCCAAGTTTAAGAGCTATGCTGGAAACAGCATAGCAAGTTTAAATAAGGCTAGTCCGTTATCAACTTGAAAAAGTGGCACCGAGTCGGTGCTTTTTT
4|sgACIN1_4|ACIN1	TGAGGGACAAAAATCTAGGG	0	0	0	0	0	0	0	0	0	22985	ACIN1	ACIN1	4|sg_hACIN1_04|ACIN1	ACIN1	ACCGTGAGGGACAAAAATCTAGGGGTTTAAGAGCTATGCTGGAAACAGCATAGCAAGTTTAAATAAGGCTAGTCCGTTATCAACTTGAAAAAGTGGCACCGAGTCGGTGCTTTTTT
4|sgACKR1_1|ACKR1	AGCTAGGATACCCAGGACAC	4	1	0	1	0	1	0	29648	0	2532	ACKR1	ACKR1	4|sg_hACKR1_01|ACKR1	ACKR1	ACCGAGCTAGGATACCCAGGACACGTTTAAGAGCTATGCTGGAAACAGCATAGCAAGTTTAAATAAGGCTAGTCCGTTATCAACTTGAAAAAGTGGCACCGAGTCGGTGCTTTTTT
4|sgACKR1_2|ACKR1	CAATGGCAACAAGACAAAGA	0	0	0	0	0	0	0	0	0	2532	ACKR1	ACKR1	4|sg_hACKR1_02|ACKR1	ACKR1	ACCGCAATGGCAACAAGACAAAGAGTTTAAGAGCTATGCTGGAAACAGCATAGCAAGTTTAAATAAGGCTAGTCCGTTATCAACTTGAAAAAGTGGCACCGAGTCGGTGCTTTTTT
4|sgACKR1_3|ACKR1	CTGCACCCTGATATACAGCA	0	0	0	0	0	0	0	0	0	2532	ACKR1	ACKR1	4|sg_hACKR1_03|ACKR1	ACKR1	ACCGCTGCACCCTGATATACAGCAGTTTAAGAGCTATGCTGGAAACAGCATAGCAAGTTTAAATAAGGCTAGTCCGTTATCAACTTGAAAAAGTGGCACCGAGTCGGTGCTTTTTT
4|sgACKR1_4|ACKR1	GAAGGAATCATTCACACCAT	0	0	0	0	0	0	0	0	0	2532	ACKR1	ACKR1	4|sg_hACKR1_04|ACKR1	ACKR1	ACCGGAAGGAATCATTCACACCATGTTTAAGAGCTATGCTGGAAACAGCATAGCAAGTTTAAATAAGGCTAGTCCGTTATCAACTTGAAAAAGTGGCACCGAGTCGGTGCTTTTTT
4|sgACKR2_1|ACKR2	ATCTCAACCATCCGCCTGCG	0	0	0	0	0	0	0	0	0	1238	ACKR2	ACKR2	4|sg_hACKR2_01|ACKR2	ACKR2	ACCGATCTCAACCATCCGCCTGCGGTTTAAGAGCTATGCTGGAAACAGCATAGCAAGTTTAAATAAGGCTAGTCCGTTATCAACTTGAAAAAGTGGCACCGAGTCGGTGCTTTTTT
4|sgACKR2_2|ACKR2	CAGCCCATACTATGGTAGCA	0	0	0	0	0	0	0	0	0	1238	ACKR2	ACKR2	4|sg_hACKR2_02|ACKR2	ACKR2	ACCGCAGCCCATACTATGGTAGCAGTTTAAGAGCTATGCTGGAAACAGCATAGCAAGTTTAAATAAGGCTAGTCCGTTATCAACTTGAAAAAGTGGCACCGAGTCGGTGCTTTTTT
4|sgACKR2_3|ACKR2	CATGCCCGCCGAAATCTGCG	0	0	0	0	0	0	0	0	0	1238	ACKR2	ACKR2	4|sg_hACKR2_03|ACKR2	ACKR2	ACCGCATGCCCGCCGAAATCTGCGGTTTAAGAGCTATGCTGGAAACAGCATAGCAAGTTTAAATAAGGCTAGTCCGTTATCAACTTGAAAAAGTGGCACCGAGTCGGTGCTTTTTT
4|sgACKR2_4|ACKR2	GGAGTGGAAGGAGAAACCCT	0	0	0	0	0	0	0	0	0	1238	ACKR2	ACKR2	4|sg_hACKR2_04|ACKR2	ACKR2	ACCGGGAGTGGAAGGAGAAACCCTGTTTAAGAGCTATGCTGGAAACAGCATAGCAAGTTTAAATAAGGCTAGTCCGTTATCAACTTGAAAAAGTGGCACCGAGTCGGTGCTTTTTT
4|sgACKR3_1|ACKR3	AAGACAGCGATAATGGAGAA	0	0	0	0	0	0	0	0	0	57007	ACKR3	ACKR3	4|sg_hACKR3_01|ACKR3	ACKR3	ACCGAAGACAGCGATAATGGAGAAGTTTAAGAGCTATGCTGGAAACAGCATAGCAAGTTTAAATAAGGCTAGTCCGTTATCAACTTGAAAAAGTGGCACCGAGTCGGTGCTTTTTT
4|sgACKR3_2|ACKR3	GCACTGCTACATCTTGAACC	0	0	0	0	0	0	0	0	0	57007	ACKR3	ACKR3	4|sg_hACKR3_02|ACKR3	ACKR3	ACCGGCACTGCTACATCTTGAACCGTTTAAGAGCTATGCTGGAAACAGCATAGCAAGTTTAAATAAGGCTAGTCCGTTATCAACTTGAAAAAGTGGCACCGAGTCGGTGCTTTTTT
4|sgACKR3_3|ACKR3	GGTCCACGCTCATGCACGTG	0	0	0	0	0	0	0	0	0	57007	ACKR3	ACKR3	4|sg_hACKR3_03|ACKR3	ACKR3	ACCGGGTCCACGCTCATGCACGTGGTTTAAGAGCTATGCTGGAAACAGCATAGCAAGTTTAAATAAGGCTAGTCCGTTATCAACTTGAAAAAGTGGCACCGAGTCGGTGCTTTTTT
4|sgACKR3_4|ACKR3	TTTGCACGTGAGCTCGCCCA	0	0	0	0	0	0	0	0	0	57007	ACKR3	ACKR3	4|sg_hACKR3_04|ACKR3	ACKR3	ACCGTTTGCACGTGAGCTCGCCCAGTTTAAGAGCTATGCTGGAAACAGCATAGCAAGTTTAAATAAGGCTAGTCCGTTATCAACTTGAAAAAGTGGCACCGAGTCGGTGCTTTTTT
4|sgACKR4_1|ACKR4	AGTCCCCAGCCAATCAGGAG	0	0	0	0	0	0	0	0	0	51554	ACKR4	ACKR4	4|sg_hACKR4_01|ACKR4	ACKR4	ACCGAGTCCCCAGCCAATCAGGAGGTTTAAGAGCTATGCTGGAAACAGCATAGCAAGTTTAAATAAGGCTAGTCCGTTATCAACTTGAAAAAGTGGCACCGAGTCGGTGCTTTTTT
4|sgACKR4_2|ACKR4	ATTGATGTTCCTAGGTAGCG	0	0	0	0	0	0	0	0	0	51554	ACKR4	ACKR4	4|sg_hACKR4_02|ACKR4	ACKR4	ACCGATTGATGTTCCTAGGTAGCGGTTTAAGAGCTATGCTGGAAACAGCATAGCAAGTTTAAATAAGGCTAGTCCGTTATCAACTTGAAAAAGTGGCACCGAGTCGGTGCTTTTTT
4|sgACKR4_3|ACKR4	CAATGACGAAAACTATTGTG	3	1	1	0	0	2	1	26068	0	51554	ACKR4	ACKR4	4|sg_hACKR4_03|ACKR4	ACKR4	ACCGCAATGACGAAAACTATTGTGGTTTAAGAGCTATGCTGGAAACAGCATAGCAAGTTTAAATAAGGCTAGTCCGTTATCAACTTGAAAAAGTGGCACCGAGTCGGTGCTTTTTT
4|sgACKR4_4|ACKR4	TGTGCTACTTTATCACAGCA	0	0	0	0	0	1	0	6196	0	51554	ACKR4	ACKR4	4|sg_hACKR4_04|ACKR4	ACKR4	ACCGTGTGCTACTTTATCACAGCAGTTTAAGAGCTATGCTGGAAACAGCATAGCAAGTTTAAATAAGGCTAGTCCGTTATCAACTTGAAAAAGTGGCACCGAGTCGGTGCTTTTTT
4|sgACLY_1|ACLY	AGAGCAATTCGAGATTACCA	0	0	0	0	0	0	0	0	0	47	ACLY	ACLY	4|sg_hACLY_01|ACLY	ACLY	ACCGAGAGCAATTCGAGATTACCAGTTTAAGAGCTATGCTGGAAACAGCATAGCAAGTTTAAATAAGGCTAGTCCGTTATCAACTTGAAAAAGTGGCACCGAGTCGGTGCTTTTTT
4|sgACLY_2|ACLY	CGGTCACCTGTACACGACAG	0	0	0	0	0	0	0	0	0	47	ACLY	ACLY	4|sg_hACLY_02|ACLY	ACLY	ACCGCGGTCACCTGTACACGACAGGTTTAAGAGCTATGCTGGAAACAGCATAGCAAGTTTAAATAAGGCTAGTCCGTTATCAACTTGAAAAAGTGGCACCGAGTCGGTGCTTTTTT
4|sgACLY_3|ACLY	GACCAGCTGATCAAACGTCG	0	0	0	0	0	0	0	0	0	47	ACLY	ACLY	4|sg_hACLY_03|ACLY	ACLY	ACCGGACCAGCTGATCAAACGTCGGTTTAAGAGCTATGCTGGAAACAGCATAGCAAGTTTAAATAAGGCTAGTCCGTTATCAACTTGAAAAAGTGGCACCGAGTCGGTGCTTTTTT
4|sgACLY_4|ACLY	GCCAGCGGGAGCACATCGGT	0	0	0	0	0	0	0	0	0	47	ACLY	ACLY	4|sg_hACLY_04|ACLY	ACLY	ACCGGCCAGCGGGAGCACATCGGTGTTTAAGAGCTATGCTGGAAACAGCATAGCAAGTTTAAATAAGGCTAGTCCGTTATCAACTTGAAAAAGTGGCACCGAGTCGGTGCTTTTTT
4|sgACMSD_1|ACMSD	AGTGGTGCGAGAGAATTGCT	0	0	0	0	0	0	0	0	0	130013	ACMSD	ACMSD	4|sg_hACMSD_01|ACMSD	ACMSD	ACCGAGTGGTGCGAGAGAATTGCTGTTTAAGAGCTATGCTGGAAACAGCATAGCAAGTTTAAATAAGGCTAGTCCGTTATCAACTTGAAAAAGTGGCACCGAGTCGGTGCTTTTTT
4|sgACMSD_2|ACMSD	CCTCCTGGGGTAGCTCACAA	0	0	0	0	0	0	0	0	0	130013	ACMSD	ACMSD	4|sg_hACMSD_02|ACMSD	ACMSD	ACCGCCTCCTGGGGTAGCTCACAAGTTTAAGAGCTATGCTGGAAACAGCATAGCAAGTTTAAATAAGGCTAGTCCGTTATCAACTTGAAAAAGTGGCACCGAGTCGGTGCTTTTTT
4|sgACMSD_3|ACMSD	CGAGTGGGACCTGAACGCGC	0	0	0	0	0	0	0	0	0	130013	ACMSD	ACMSD	4|sg_hACMSD_03|ACMSD	ACMSD	ACCGCGAGTGGGACCTGAACGCGCGTTTAAGAGCTATGCTGGAAACAGCATAGCAAGTTTAAATAAGGCTAGTCCGTTATCAACTTGAAAAAGTGGCACCGAGTCGGTGCTTTTTT
4|sgACMSD_4|ACMSD	CTGCAGAGGTTTGGCTACGG	0	0	0	0	0	0	3726	0	0	130013	ACMSD	ACMSD	4|sg_hACMSD_04|ACMSD	ACMSD	ACCGCTGCAGAGGTTTGGCTACGGGTTTAAGAGCTATGCTGGAAACAGCATAGCAAGTTTAAATAAGGCTAGTCCGTTATCAACTTGAAAAAGTGGCACCGAGTCGGTGCTTTTTT
4|sgACO1_1|ACO1	CCTGCCCCTAACATCACAGA	0	0	0	0	0	0	0	0	0	48	ACO1	ACO1	4|sg_hACO1_01|ACO1	ACO1	ACCGCCTGCCCCTAACATCACAGAGTTTAAGAGCTATGCTGGAAACAGCATAGCAAGTTTAAATAAGGCTAGTCCGTTATCAACTTGAAAAAGTGGCACCGAGTCGGTGCTTTTTT
4|sgACO1_2|ACO1	CTTGGTGTCTAGGTTTGACG	0	0	0	0	0	0	0	0	0	48	ACO1	ACO1	4|sg_hACO1_02|ACO1	ACO1	ACCGCTTGGTGTCTAGGTTTGACGGTTTAAGAGCTATGCTGGAAACAGCATAGCAAGTTTAAATAAGGCTAGTCCGTTATCAACTTGAAAAAGTGGCACCGAGTCGGTGCTTTTTT
4|sgACO1_3|ACO1	TTATTACCCAGACAGCCTCG	0	0	0	0	0	0	0	0	0	48	ACO1	ACO1	4|sg_hACO1_03|ACO1	ACO1	ACCGTTATTACCCAGACAGCCTCGGTTTAAGAGCTATGCTGGAAACAGCATAGCAAGTTTAAATAAGGCTAGTCCGTTATCAACTTGAAAAAGTGGCACCGAGTCGGTGCTTTTTT
4|sgACO1_4|ACO1	TTGCATATGCTATTACTAAG	0	0	0	0	0	0	0	0	0	48	ACO1	ACO1	4|sg_hACO1_04|ACO1	ACO1	ACCGTTGCATATGCTATTACTAAGGTTTAAGAGCTATGCTGGAAACAGCATAGCAAGTTTAAATAAGGCTAGTCCGTTATCAACTTGAAAAAGTGGCACCGAGTCGGTGCTTTTTT
4|sgACO2_1|ACO2	ATCTTCTCCGAGAGTGTCAG	0	0	0	0	0	0	0	0	0	50	ACO2	ACO2	4|sg_hACO2_01|ACO2	ACO2	ACCGATCTTCTCCGAGAGTGTCAGGTTTAAGAGCTATGCTGGAAACAGCATAGCAAGTTTAAATAAGGCTAGTCCGTTATCAACTTGAAAAAGTGGCACCGAGTCGGTGCTTTTTT
4|sgACO2_2|ACO2	GTGCAGCTACCAATTAGACC	0	0	0	0	0	0	0	0	0	50	ACO2	ACO2	4|sg_hACO2_02|ACO2	ACO2	ACCGGTGCAGCTACCAATTAGACCGTTTAAGAGCTATGCTGGAAACAGCATAGCAAGTTTAAATAAGGCTAGTCCGTTATCAACTTGAAAAAGTGGCACCGAGTCGGTGCTTTTTT
4|sgACO2_3|ACO2	TCTCGGGGTTTGCGTCGTTG	0	0	0	0	0	0	0	0	0	50	ACO2	ACO2	4|sg_hACO2_03|ACO2	ACO2	ACCGTCTCGGGGTTTGCGTCGTTGGTTTAAGAGCTATGCTGGAAACAGCATAGCAAGTTTAAATAAGGCTAGTCCGTTATCAACTTGAAAAAGTGGCACCGAGTCGGTGCTTTTTT
4|sgACO2_4|ACO2	CACATAGCCGTCCCGCTCAA	0	0	0	0	0	0	0	0	0	50	ACO2	ACO2	4|sg_hACO2_04|ACO2	ACO2	ACCGCACATAGCCGTCCCGCTCAAGTTTAAGAGCTATGCTGGAAACAGCATAGCAAGTTTAAATAAGGCTAGTCCGTTATCAACTTGAAAAAGTGGCACCGAGTCGGTGCTTTTTT
4|sgACOT1_1|ACOT1	ACAATGCCAGGAAAGGGCCC	0	0	0	0	0	0	0	0	0	641371	ACOT1	ACOT1	4|sg_hACOT1_01|ACOT1	ACOT1	ACCGACAATGCCAGGAAAGGGCCCGTTTAAGAGCTATGCTGGAAACAGCATAGCAAGTTTAAATAAGGCTAGTCCGTTATCAACTTGAAAAAGTGGCACCGAGTCGGTGCTTTTTT
4|sgACOT1_2|ACOT1	AGCCCGAGAAACCCTTGGTG	0	0	0	0	0	0	0	0	0	641371	ACOT1	ACOT1	4|sg_hACOT1_02|ACOT1	ACOT1	ACCGAGCCCGAGAAACCCTTGGTGGTTTAAGAGCTATGCTGGAAACAGCATAGCAAGTTTAAATAAGGCTAGTCCGTTATCAACTTGAAAAAGTGGCACCGAGTCGGTGCTTTTTT
4|sgACOT1_3|ACOT1	CTACTTGCTCAGTCATCCTG	0	0	4531	0	0	0	0	0	0	641371	ACOT1	ACOT1	4|sg_hACOT1_03|ACOT1	ACOT1	ACCGCTACTTGCTCAGTCATCCTGGTTTAAGAGCTATGCTGGAAACAGCATAGCAAGTTTAAATAAGGCTAGTCCGTTATCAACTTGAAAAAGTGGCACCGAGTCGGTGCTTTTTT
4|sgACOT1_4|ACOT1	GGGGGAACCTTACGCTACAA	0	0	0	0	0	0	0	0	0	641371	ACOT1	ACOT1	4|sg_hACOT1_04|ACOT1	ACOT1	ACCGGGGGGAACCTTACGCTACAAGTTTAAGAGCTATGCTGGAAACAGCATAGCAAGTTTAAATAAGGCTAGTCCGTTATCAACTTGAAAAAGTGGCACCGAGTCGGTGCTTTTTT
4|sgACOT11_1|ACOT11	AGCTGAAGCAGATCACGCCG	0	0	0	0	0	0	0	0	0	26027	ACOT11	ACOT11	4|sg_hACOT11_01|ACOT11	ACOT11	ACCGAGCTGAAGCAGATCACGCCGGTTTAAGAGCTATGCTGGAAACAGCATAGCAAGTTTAAATAAGGCTAGTCCGTTATCAACTTGAAAAAGTGGCACCGAGTCGGTGCTTTTTT
4|sgACOT11_2|ACOT11	ATCTGCGTCCAGGACCACAA	0	0	0	0	0	0	0	0	0	26027	ACOT11	ACOT11	4|sg_hACOT11_02|ACOT11	ACOT11	ACCGATCTGCGTCCAGGACCACAAGTTTAAGAGCTATGCTGGAAACAGCATAGCAAGTTTAAATAAGGCTAGTCCGTTATCAACTTGAAAAAGTGGCACCGAGTCGGTGCTTTTTT
4|sgACOT11_3|ACOT11	GCCAACTGCGCCATTCAGGG	0	0	0	0	0	0	0	0	1	26027	ACOT11	ACOT11	4|sg_hACOT11_03|ACOT11	ACOT11	ACCGGCCAACTGCGCCATTCAGGGGTTTAAGAGCTATGCTGGAAACAGCATAGCAAGTTTAAATAAGGCTAGTCCGTTATCAACTTGAAAAAGTGGCACCGAGTCGGTGCTTTTTT
4|sgACOT11_4|ACOT11	GGGATACCGGAACCCCACGG	0	0	0	0	0	0	0	0	0	26027	ACOT11	ACOT11	4|sg_hACOT11_04|ACOT11	ACOT11	ACCGGGGATACCGGAACCCCACGGGTTTAAGAGCTATGCTGGAAACAGCATAGCAAGTTTAAATAAGGCTAGTCCGTTATCAACTTGAAAAAGTGGCACCGAGTCGGTGCTTTTTT
4|sgACOT12_1|ACOT12	AGCATTCAGCACAAGCATGG	0	0	0	0	0	0	0	0	0	134526	ACOT12	ACOT12	4|sg_hACOT12_01|ACOT12	ACOT12	ACCGAGCATTCAGCACAAGCATGGGTTTAAGAGCTATGCTGGAAACAGCATAGCAAGTTTAAATAAGGCTAGTCCGTTATCAACTTGAAAAAGTGGCACCGAGTCGGTGCTTTTTT
4|sgACOT12_2|ACOT12	CCACCCCATGCAAACCATCA	0	0	0	0	0	0	0	0	0	134526	ACOT12	ACOT12	4|sg_hACOT12_02|ACOT12	ACOT12	ACCGCCACCCCATGCAAACCATCAGTTTAAGAGCTATGCTGGAAACAGCATAGCAAGTTTAAATAAGGCTAGTCCGTTATCAACTTGAAAAAGTGGCACCGAGTCGGTGCTTTTTT
4|sgACOT12_3|ACOT12	GATGATTTCAGACGCTATCG	0	0	0	0	0	0	0	0	1	134526	ACOT12	ACOT12	4|sg_hACOT12_03|ACOT12	ACOT12	ACCGGATGATTTCAGACGCTATCGGTTTAAGAGCTATGCTGGAAACAGCATAGCAAGTTTAAATAAGGCTAGTCCGTTATCAACTTGAAAAAGTGGCACCGAGTCGGTGCTTTTTT
4|sgACOT12_4|ACOT12	GTAGATATGTTTAAGTTCCG	0	0	0	0	0	0	0	0	0	134526	ACOT12	ACOT12	4|sg_hACOT12_04|ACOT12	ACOT12	ACCGGTAGATATGTTTAAGTTCCGGTTTAAGAGCTATGCTGGAAACAGCATAGCAAGTTTAAATAAGGCTAGTCCGTTATCAACTTGAAAAAGTGGCACCGAGTCGGTGCTTTTTT
4|sgACOT13_1|ACOT13	ACGTGGCTGTCAAACCGCCG	0	0	0	0	0	0	0	0	0	55856	ACOT13	ACOT13	4|sg_hACOT13_01|ACOT13	ACOT13	ACCGACGTGGCTGTCAAACCGCCGGTTTAAGAGCTATGCTGGAAACAGCATAGCAAGTTTAAATAAGGCTAGTCCGTTATCAACTTGAAAAAGTGGCACCGAGTCGGTGCTTTTTT
4|sgACOT13_2|ACOT13	AGTAGATAACATATCAACAA	0	0	0	0	0	0	0	0	0	55856	ACOT13	ACOT13	4|sg_hACOT13_02|ACOT13	ACOT13	ACCGAGTAGATAACATATCAACAAGTTTAAGAGCTATGCTGGAAACAGCATAGCAAGTTTAAATAAGGCTAGTCCGTTATCAACTTGAAAAAGTGGCACCGAGTCGGTGCTTTTTT
4|sgACOT13_3|ACOT13	GGTGATAAAGGCCATGACCA	3	2	1	2	99330	3	1	1	3	55856	ACOT13	ACOT13	4|sg_hACOT13_03|ACOT13	ACOT13	ACCGGGTGATAAAGGCCATGACCAGTTTAAGAGCTATGCTGGAAACAGCATAGCAAGTTTAAATAAGGCTAGTCCGTTATCAACTTGAAAAAGTGGCACCGAGTCGGTGCTTTTTT
4|sgACOT13_4|ACOT13	GTTCATATCGACACTGACTC	0	0	0	0	0	0	0	0	0	55856	ACOT13	ACOT13	4|sg_hACOT13_04|ACOT13	ACOT13	ACCGGTTCATATCGACACTGACTCGTTTAAGAGCTATGCTGGAAACAGCATAGCAAGTTTAAATAAGGCTAGTCCGTTATCAACTTGAAAAAGTGGCACCGAGTCGGTGCTTTTTT
4|sgACOT2_1|ACOT2	AGATCATTAGGGTTCCTGCT	0	0	0	0	0	0	0	0	0	10965	ACOT2	ACOT2	4|sg_hACOT2_01|ACOT2	ACOT2	ACCGAGATCATTAGGGTTCCTGCTGTTTAAGAGCTATGCTGGAAACAGCATAGCAAGTTTAAATAAGGCTAGTCCGTTATCAACTTGAAAAAGTGGCACCGAGTCGGTGCTTTTTT
4|sgACOT2_2|ACOT2	CTACTTGCTCAGTCATCCCG	0	0	8	0	0	0	0	0	0	10965	ACOT2	ACOT2	4|sg_hACOT2_02|ACOT2	ACOT2	ACCGCTACTTGCTCAGTCATCCCGGTTTAAGAGCTATGCTGGAAACAGCATAGCAAGTTTAAATAAGGCTAGTCCGTTATCAACTTGAAAAAGTGGCACCGAGTCGGTGCTTTTTT
4|sgACOT2_3|ACOT2	GCTCGCCAAGAGTGTCGGCG	0	0	0	0	0	0	0	0	0	10965	ACOT2	ACOT2	4|sg_hACOT2_03|ACOT2	ACOT2	ACCGGCTCGCCAAGAGTGTCGGCGGTTTAAGAGCTATGCTGGAAACAGCATAGCAAGTTTAAATAAGGCTAGTCCGTTATCAACTTGAAAAAGTGGCACCGAGTCGGTGCTTTTTT
4|sgACOT2_4|ACOT2	GGTACAGCCGGGACGCTCGA	0	0	0	0	0	0	0	0	0	10965	ACOT2	ACOT2	4|sg_hACOT2_04|ACOT2	ACOT2	ACCGGGTACAGCCGGGACGCTCGAGTTTAAGAGCTATGCTGGAAACAGCATAGCAAGTTTAAATAAGGCTAGTCCGTTATCAACTTGAAAAAGTGGCACCGAGTCGGTGCTTTTTT
4|sgACOT4_1|ACOT4	ATAATAAGCTAGAGCCAACG	0	0	0	0	0	0	0	0	0	122970	ACOT4	ACOT4	4|sg_hACOT4_01|ACOT4	ACOT4	ACCGATAATAAGCTAGAGCCAACGGTTTAAGAGCTATGCTGGAAACAGCATAGCAAGTTTAAATAAGGCTAGTCCGTTATCAACTTGAAAAAGTGGCACCGAGTCGGTGCTTTTTT
4|sgACOT4_2|ACOT4	ATGTCAATGATCCCTGGGAA	0	0	0	0	0	0	0	0	0	122970	ACOT4	ACOT4	4|sg_hACOT4_02|ACOT4	ACOT4	ACCGATGTCAATGATCCCTGGGAAGTTTAAGAGCTATGCTGGAAACAGCATAGCAAGTTTAAATAAGGCTAGTCCGTTATCAACTTGAAAAAGTGGCACCGAGTCGGTGCTTTTTT
4|sgACOT4_3|ACOT4	CAGTTTCCATCAATGGATCT	0	0	0	0	0	0	0	0	0	122970	ACOT4	ACOT4	4|sg_hACOT4_03|ACOT4	ACOT4	ACCGCAGTTTCCATCAATGGATCTGTTTAAGAGCTATGCTGGAAACAGCATAGCAAGTTTAAATAAGGCTAGTCCGTTATCAACTTGAAAAAGTGGCACCGAGTCGGTGCTTTTTT
4|sgACOT4_4|ACOT4	TCGCGGGACTCGAGCCCATG	0	0	0	0	0	0	0	0	0	122970	ACOT4	ACOT4	4|sg_hACOT4_04|ACOT4	ACOT4	ACCGTCGCGGGACTCGAGCCCATGGTTTAAGAGCTATGCTGGAAACAGCATAGCAAGTTTAAATAAGGCTAGTCCGTTATCAACTTGAAAAAGTGGCACCGAGTCGGTGCTTTTTT
4|sgACOT6_1|ACOT6	ACAGGCATTGATAAGTACAG	0	0	3137	0	0	0	0	0	0	641372	ACOT6	ACOT6	4|sg_hACOT6_01|ACOT6	ACOT6	ACCGACAGGCATTGATAAGTACAGGTTTAAGAGCTATGCTGGAAACAGCATAGCAAGTTTAAATAAGGCTAGTCCGTTATCAACTTGAAAAAGTGGCACCGAGTCGGTGCTTTTTT
4|sgACOT6_2|ACOT6	ATCATATCCTTGTAATGTAG	0	0	0	1	0	0	0	0	0	641372	ACOT6	ACOT6	4|sg_hACOT6_02|ACOT6	ACOT6	ACCGATCATATCCTTGTAATGTAGGTTTAAGAGCTATGCTGGAAACAGCATAGCAAGTTTAAATAAGGCTAGTCCGTTATCAACTTGAAAAAGTGGCACCGAGTCGGTGCTTTTTT
4|sgACOT6_3|ACOT6	CTGAAAGGCTACAAGCTCAT	0	0	66344	2	2	1	1	2	4	641372	ACOT6	ACOT6	4|sg_hACOT6_03|ACOT6	ACOT6	ACCGCTGAAAGGCTACAAGCTCATGTTTAAGAGCTATGCTGGAAACAGCATAGCAAGTTTAAATAAGGCTAGTCCGTTATCAACTTGAAAAAGTGGCACCGAGTCGGTGCTTTTTT
4|sgACOT6_4|ACOT6	TTGGCATGGATGATCAAAGC	0	0	0	0	0	0	0	0	0	641372	ACOT6	ACOT6	4|sg_hACOT6_04|ACOT6	ACOT6	ACCGTTGGCATGGATGATCAAAGCGTTTAAGAGCTATGCTGGAAACAGCATAGCAAGTTTAAATAAGGCTAGTCCGTTATCAACTTGAAAAAGTGGCACCGAGTCGGTGCTTTTTT
4|sgACOT7_1|ACOT7	CAGGGGCACATACCACAGGG	2	2	52655	1	1	3	2	0	2	11332	ACOT7	ACOT7	4|sg_hACOT7_01|ACOT7	ACOT7	ACCGCAGGGGCACATACCACAGGGGTTTAAGAGCTATGCTGGAAACAGCATAGCAAGTTTAAATAAGGCTAGTCCGTTATCAACTTGAAAAAGTGGCACCGAGTCGGTGCTTTTTT
4|sgACOT7_2|ACOT7	GCGGCCAGATGATGCCAACG	2	36452	2	0	0	1	0	0	3	11332	ACOT7	ACOT7	4|sg_hACOT7_02|ACOT7	ACOT7	ACCGGCGGCCAGATGATGCCAACGGTTTAAGAGCTATGCTGGAAACAGCATAGCAAGTTTAAATAAGGCTAGTCCGTTATCAACTTGAAAAAGTGGCACCGAGTCGGTGCTTTTTT
4|sgACOT7_3|ACOT7	CGGTGCGCTCGACACGAGCC	0	0	0	0	0	0	0	0	0	11332	ACOT7	ACOT7	4|sg_hACOT7_03|ACOT7	ACOT7	ACCGCGGTGCGCTCGACACGAGCCGTTTAAGAGCTATGCTGGAAACAGCATAGCAAGTTTAAATAAGGCTAGTCCGTTATCAACTTGAAAAAGTGGCACCGAGTCGGTGCTTTTTT
4|sgACOT7_4|ACOT7	TTTCTCGCAGTATTCCCGGC	0	0	0	0	0	0	0	0	0	11332	ACOT7	ACOT7	4|sg_hACOT7_04|ACOT7	ACOT7	ACCGTTTCTCGCAGTATTCCCGGCGTTTAAGAGCTATGCTGGAAACAGCATAGCAAGTTTAAATAAGGCTAGTCCGTTATCAACTTGAAAAAGTGGCACCGAGTCGGTGCTTTTTT
4|sgACOT8_1|ACOT8	ATTACTGGGTACCGGCCAAG	0	0	0	0	0	0	0	0	0	10005	ACOT8	ACOT8	4|sg_hACOT8_01|ACOT8	ACOT8	ACCGATTACTGGGTACCGGCCAAGGTTTAAGAGCTATGCTGGAAACAGCATAGCAAGTTTAAATAAGGCTAGTCCGTTATCAACTTGAAAAAGTGGCACCGAGTCGGTGCTTTTTT
4|sgACOT8_2|ACOT8	CCTTAAATACTGGTCAATGA	0	0	0	0	0	0	0	0	0	10005	ACOT8	ACOT8	4|sg_hACOT8_02|ACOT8	ACOT8	ACCGCCTTAAATACTGGTCAATGAGTTTAAGAGCTATGCTGGAAACAGCATAGCAAGTTTAAATAAGGCTAGTCCGTTATCAACTTGAAAAAGTGGCACCGAGTCGGTGCTTTTTT
4|sgACOT8_3|ACOT8	TCGTGACCAAGACGCTACGG	0	0	0	0	0	0	0	0	2	10005	ACOT8	ACOT8	4|sg_hACOT8_03|ACOT8	ACOT8	ACCGTCGTGACCAAGACGCTACGGGTTTAAGAGCTATGCTGGAAACAGCATAGCAAGTTTAAATAAGGCTAGTCCGTTATCAACTTGAAAAAGTGGCACCGAGTCGGTGCTTTTTT
4|sgACOT8_4|ACOT8	TTACTGGCTTGATCTCAATG	0	61737	0	0	2	0	0	1	8	10005	ACOT8	ACOT8	4|sg_hACOT8_04|ACOT8	ACOT8	ACCGTTACTGGCTTGATCTCAATGGTTTAAGAGCTATGCTGGAAACAGCATAGCAAGTTTAAATAAGGCTAGTCCGTTATCAACTTGAAAAAGTGGCACCGAGTCGGTGCTTTTTT
4|sgACOT9_1|ACOT9	AAGAGGAGCTCTTTAGACAA	0	0	0	0	0	0	0	0	0	23597	ACOT9	ACOT9	4|sg_hACOT9_01|ACOT9	ACOT9	ACCGAAGAGGAGCTCTTTAGACAAGTTTAAGAGCTATGCTGGAAACAGCATAGCAAGTTTAAATAAGGCTAGTCCGTTATCAACTTGAAAAAGTGGCACCGAGTCGGTGCTTTTTT
4|sgACOT9_2|ACOT9	CTTACCAATCTTATCCACCA	0	0	0	0	0	0	0	0	0	23597	ACOT9	ACOT9	4|sg_hACOT9_02|ACOT9	ACOT9	ACCGCTTACCAATCTTATCCACCAGTTTAAGAGCTATGCTGGAAACAGCATAGCAAGTTTAAATAAGGCTAGTCCGTTATCAACTTGAAAAAGTGGCACCGAGTCGGTGCTTTTTT
4|sgACOT9_3|ACOT9	GAGAAACATCTCATGTATGG	0	0	26133	0	0	0	0	5886	1	23597	ACOT9	ACOT9	4|sg_hACOT9_03|ACOT9	ACOT9	ACCGGAGAAACATCTCATGTATGGGTTTAAGAGCTATGCTGGAAACAGCATAGCAAGTTTAAATAAGGCTAGTCCGTTATCAACTTGAAAAAGTGGCACCGAGTCGGTGCTTTTTT
4|sgACOT9_4|ACOT9	TCTTCCCGACCCAGCTAACA	0	0	0	0	0	0	0	0	0	23597	ACOT9	ACOT9	4|sg_hACOT9_04|ACOT9	ACOT9	ACCGTCTTCCCGACCCAGCTAACAGTTTAAGAGCTATGCTGGAAACAGCATAGCAAGTTTAAATAAGGCTAGTCCGTTATCAACTTGAAAAAGTGGCACCGAGTCGGTGCTTTTTT
4|sgACOX1_1|ACOX1	ACCTATCACCGGATTAACGA	0	0	0	0	0	0	0	0	0	51	ACOX1	ACOX1	4|sg_hACOX1_01|ACOX1	ACOX1	ACCGACCTATCACCGGATTAACGAGTTTAAGAGCTATGCTGGAAACAGCATAGCAAGTTTAAATAAGGCTAGTCCGTTATCAACTTGAAAAAGTGGCACCGAGTCGGTGCTTTTTT
4|sgACOX1_2|ACOX1	CTGTGGTTTCCAAGCCTCGA	0	0	0	0	0	0	0	0	0	51	ACOX1	ACOX1	4|sg_hACOX1_02|ACOX1	ACOX1	ACCGCTGTGGTTTCCAAGCCTCGAGTTTAAGAGCTATGCTGGAAACAGCATAGCAAGTTTAAATAAGGCTAGTCCGTTATCAACTTGAAAAAGTGGCACCGAGTCGGTGCTTTTTT
4|sgACOX1_3|ACOX1	GCGCCGCCGAGAGATCGGTG	3	2	1	0	0	0	1	26027	0	51	ACOX1	ACOX1	4|sg_hACOX1_03|ACOX1	ACOX1	ACCGGCGCCGCCGAGAGATCGGTGGTTTAAGAGCTATGCTGGAAACAGCATAGCAAGTTTAAATAAGGCTAGTCCGTTATCAACTTGAAAAAGTGGCACCGAGTCGGTGCTTTTTT
4|sgACOX1_4|ACOX1	TGGCATTGAAGCATGTCGGA	0	0	0	0	0	0	0	0	0	51	ACOX1	ACOX1	4|sg_hACOX1_04|ACOX1	ACOX1	ACCGTGGCATTGAAGCATGTCGGAGTTTAAGAGCTATGCTGGAAACAGCATAGCAAGTTTAAATAAGGCTAGTCCGTTATCAACTTGAAAAAGTGGCACCGAGTCGGTGCTTTTTT
4|sgACOX2_1|ACOX2	GACCATCTTCTAACCAACCC	0	0	0	0	0	0	0	0	0	8309	ACOX2	ACOX2	4|sg_hACOX2_01|ACOX2	ACOX2	ACCGGACCATCTTCTAACCAACCCGTTTAAGAGCTATGCTGGAAACAGCATAGCAAGTTTAAATAAGGCTAGTCCGTTATCAACTTGAAAAAGTGGCACCGAGTCGGTGCTTTTTT
4|sgACOX2_2|ACOX2	GCATAACTGATGGCCAGCTG	0	0	0	0	0	0	0	0	0	8309	ACOX2	ACOX2	4|sg_hACOX2_02|ACOX2	ACOX2	ACCGGCATAACTGATGGCCAGCTGGTTTAAGAGCTATGCTGGAAACAGCATAGCAAGTTTAAATAAGGCTAGTCCGTTATCAACTTGAAAAAGTGGCACCGAGTCGGTGCTTTTTT
4|sgACOX2_3|ACOX2	GTGTATCACAAACTCCTGGG	0	0	0	0	0	0	0	0	0	8309	ACOX2	ACOX2	4|sg_hACOX2_03|ACOX2	ACOX2	ACCGGTGTATCACAAACTCCTGGGGTTTAAGAGCTATGCTGGAAACAGCATAGCAAGTTTAAATAAGGCTAGTCCGTTATCAACTTGAAAAAGTGGCACCGAGTCGGTGCTTTTTT
4|sgACOX2_4|ACOX2	TGCTGTACCGAGTTTGACGT	0	0	0	0	0	0	0	0	0	8309	ACOX2	ACOX2	4|sg_hACOX2_04|ACOX2	ACOX2	ACCGTGCTGTACCGAGTTTGACGTGTTTAAGAGCTATGCTGGAAACAGCATAGCAAGTTTAAATAAGGCTAGTCCGTTATCAACTTGAAAAAGTGGCACCGAGTCGGTGCTTTTTT
4|sgACOX3_1|ACOX3	AAGCCACGGCAGTAATACCA	0	0	0	0	0	0	0	0	1	8310	ACOX3	ACOX3	4|sg_hACOX3_01|ACOX3	ACOX3	ACCGAAGCCACGGCAGTAATACCAGTTTAAGAGCTATGCTGGAAACAGCATAGCAAGTTTAAATAAGGCTAGTCCGTTATCAACTTGAAAAAGTGGCACCGAGTCGGTGCTTTTTT
4|sgACOX3_2|ACOX3	CCGCACGCCTCACCTTAAAG	0	0	0	0	0	0	0	0	0	8310	ACOX3	ACOX3	4|sg_hACOX3_02|ACOX3	ACOX3	ACCGCCGCACGCCTCACCTTAAAGGTTTAAGAGCTATGCTGGAAACAGCATAGCAAGTTTAAATAAGGCTAGTCCGTTATCAACTTGAAAAAGTGGCACCGAGTCGGTGCTTTTTT
4|sgACOX3_3|ACOX3	GATCCCAACTGCACATACGA	0	0	0	0	0	0	0	0	0	8310	ACOX3	ACOX3	4|sg_hACOX3_03|ACOX3	ACOX3	ACCGGATCCCAACTGCACATACGAGTTTAAGAGCTATGCTGGAAACAGCATAGCAAGTTTAAATAAGGCTAGTCCGTTATCAACTTGAAAAAGTGGCACCGAGTCGGTGCTTTTTT
4|sgACOX3_4|ACOX3	GCGTCAGTTTGGACCCACAG	0	0	0	0	0	0	0	0	0	8310	ACOX3	ACOX3	4|sg_hACOX3_04|ACOX3	ACOX3	ACCGGCGTCAGTTTGGACCCACAGGTTTAAGAGCTATGCTGGAAACAGCATAGCAAGTTTAAATAAGGCTAGTCCGTTATCAACTTGAAAAAGTGGCACCGAGTCGGTGCTTTTTT
4|sgACOXL_1|ACOXL	AAGCCACAGCTAATCTCGAA	0	0	0	0	0	0	0	0	0	55289	ACOXL	ACOXL	4|sg_hACOXL_01|ACOXL	ACOXL	ACCGAAGCCACAGCTAATCTCGAAGTTTAAGAGCTATGCTGGAAACAGCATAGCAAGTTTAAATAAGGCTAGTCCGTTATCAACTTGAAAAAGTGGCACCGAGTCGGTGCTTTTTT
4|sgACOXL_2|ACOXL	ACAGGAACGATGAAACAGTG	0	0	0	0	0	0	0	0	0	55289	ACOXL	ACOXL	4|sg_hACOXL_02|ACOXL	ACOXL	ACCGACAGGAACGATGAAACAGTGGTTTAAGAGCTATGCTGGAAACAGCATAGCAAGTTTAAATAAGGCTAGTCCGTTATCAACTTGAAAAAGTGGCACCGAGTCGGTGCTTTTTT
4|sgACOXL_3|ACOXL	ATGTTTGCAATGACCGAGAG	0	0	0	0	0	0	0	0	0	55289	ACOXL	ACOXL	4|sg_hACOXL_03|ACOXL	ACOXL	ACCGATGTTTGCAATGACCGAGAGGTTTAAGAGCTATGCTGGAAACAGCATAGCAAGTTTAAATAAGGCTAGTCCGTTATCAACTTGAAAAAGTGGCACCGAGTCGGTGCTTTTTT
4|sgACOXL_4|ACOXL	TGACAAGGTTCGGATACCCA	0	0	0	0	0	0	0	0	0	55289	ACOXL	ACOXL	4|sg_hACOXL_04|ACOXL	ACOXL	ACCGTGACAAGGTTCGGATACCCAGTTTAAGAGCTATGCTGGAAACAGCATAGCAAGTTTAAATAAGGCTAGTCCGTTATCAACTTGAAAAAGTGGCACCGAGTCGGTGCTTTTTT
4|sgACP1_1|ACP1	ACATAGTATATAATCAAATG	0	0	0	0	0	0	0	0	0	52	ACP1	ACP1	4|sg_hACP1_01|ACP1	ACP1	ACCGACATAGTATATAATCAAATGGTTTAAGAGCTATGCTGGAAACAGCATAGCAAGTTTAAATAAGGCTAGTCCGTTATCAACTTGAAAAAGTGGCACCGAGTCGGTGCTTTTTT
4|sgACP1_2|ACP1	ACCCAGACACACAAACAGCA	237437	3	2	2	5	1	6	25	7	52	ACP1	ACP1	4|sg_hACP1_02|ACP1	ACP1	ACCGACCCAGACACACAAACAGCAGTTTAAGAGCTATGCTGGAAACAGCATAGCAAGTTTAAATAAGGCTAGTCCGTTATCAACTTGAAAAAGTGGCACCGAGTCGGTGCTTTTTT
4|sgACP1_3|ACP1	GGAACCCCCCTGACTACCGA	10	4	0	0	1	0	1	1	33676	52	ACP1	ACP1	4|sg_hACP1_03|ACP1	ACP1	ACCGGGAACCCCCCTGACTACCGAGTTTAAGAGCTATGCTGGAAACAGCATAGCAAGTTTAAATAAGGCTAGTCCGTTATCAACTTGAAAAAGTGGCACCGAGTCGGTGCTTTTTT
4|sgACP1_4|ACP1	GGGGTTCCCTATCTCATACC	0	0	0	0	0	0	0	0	0	52	ACP1	ACP1	4|sg_hACP1_04|ACP1	ACP1	ACCGGGGGTTCCCTATCTCATACCGTTTAAGAGCTATGCTGGAAACAGCATAGCAAGTTTAAATAAGGCTAGTCCGTTATCAACTTGAAAAAGTGGCACCGAGTCGGTGCTTTTTT
4|sgACP2_1|ACP2	ACATGGTGGCCAACGAGACA	0	0	6807	0	0	0	0	0	0	53	ACP2	ACP2	4|sg_hACP2_01|ACP2	ACP2	ACCGACATGGTGGCCAACGAGACAGTTTAAGAGCTATGCTGGAAACAGCATAGCAAGTTTAAATAAGGCTAGTCCGTTATCAACTTGAAAAAGTGGCACCGAGTCGGTGCTTTTTT
4|sgACP2_2|ACP2	ACCAGTGAAGACATATCCCA	0	0	0	0	0	0	0	0	0	53	ACP2	ACP2	4|sg_hACP2_02|ACP2	ACP2	ACCGACCAGTGAAGACATATCCCAGTTTAAGAGCTATGCTGGAAACAGCATAGCAAGTTTAAATAAGGCTAGTCCGTTATCAACTTGAAAAAGTGGCACCGAGTCGGTGCTTTTTT
4|sgACP2_3|ACP2	CACCTCTTATCACCGGCAAG	0	0	0	0	0	0	0	0	0	53	ACP2	ACP2	4|sg_hACP2_03|ACP2	ACP2	ACCGCACCTCTTATCACCGGCAAGGTTTAAGAGCTATGCTGGAAACAGCATAGCAAGTTTAAATAAGGCTAGTCCGTTATCAACTTGAAAAAGTGGCACCGAGTCGGTGCTTTTTT
4|sgACP2_4|ACP2	TTCTGCAGCTGCTCATAACG	0	0	0	0	0	0	0	0	0	53	ACP2	ACP2	4|sg_hACP2_04|ACP2	ACP2	ACCGTTCTGCAGCTGCTCATAACGGTTTAAGAGCTATGCTGGAAACAGCATAGCAAGTTTAAATAAGGCTAGTCCGTTATCAACTTGAAAAAGTGGCACCGAGTCGGTGCTTTTTT
4|sgACP5_1|ACP5	ACCCACGGCTACAAAGCGCA	0	0	0	0	0	0	0	0	0	54	ACP5	ACP5	4|sg_hACP5_01|ACP5	ACP5	ACCGACCCACGGCTACAAAGCGCAGTTTAAGAGCTATGCTGGAAACAGCATAGCAAGTTTAAATAAGGCTAGTCCGTTATCAACTTGAAAAAGTGGCACCGAGTCGGTGCTTTTTT
4|sgACP5_2|ACP5	CTGGACACAGTGACACTATG	0	0	0	0	0	0	0	0	0	54	ACP5	ACP5	4|sg_hACP5_02|ACP5	ACP5	ACCGCTGGACACAGTGACACTATGGTTTAAGAGCTATGCTGGAAACAGCATAGCAAGTTTAAATAAGGCTAGTCCGTTATCAACTTGAAAAAGTGGCACCGAGTCGGTGCTTTTTT
4|sgACP5_3|ACP5	GCTCGGCTATGGACCACACG	0	0	0	0	0	0	0	0	0	54	ACP5	ACP5	4|sg_hACP5_03|ACP5	ACP5	ACCGGCTCGGCTATGGACCACACGGTTTAAGAGCTATGCTGGAAACAGCATAGCAAGTTTAAATAAGGCTAGTCCGTTATCAACTTGAAAAAGTGGCACCGAGTCGGTGCTTTTTT
4|sgACP5_4|ACP5	GTACCAGGGCACTTTGCGAA	0	0	0	0	0	0	0	0	0	54	ACP5	ACP5	4|sg_hACP5_04|ACP5	ACP5	ACCGGTACCAGGGCACTTTGCGAAGTTTAAGAGCTATGCTGGAAACAGCATAGCAAGTTTAAATAAGGCTAGTCCGTTATCAACTTGAAAAAGTGGCACCGAGTCGGTGCTTTTTT
4|sgACP6_1|ACP6	AAAAAGGTGAAGGACAGGAT	0	0	0	0	0	0	0	0	0	51205	ACP6	ACP6	4|sg_hACP6_01|ACP6	ACP6	ACCGAAAAAGGTGAAGGACAGGATGTTTAAGAGCTATGCTGGAAACAGCATAGCAAGTTTAAATAAGGCTAGTCCGTTATCAACTTGAAAAAGTGGCACCGAGTCGGTGCTTTTTT
4|sgACP6_2|ACP6	ACAGTCACCAATCTAGCTGG	0	0	0	0	0	0	0	0	0	51205	ACP6	ACP6	4|sg_hACP6_02|ACP6	ACP6	ACCGACAGTCACCAATCTAGCTGGGTTTAAGAGCTATGCTGGAAACAGCATAGCAAGTTTAAATAAGGCTAGTCCGTTATCAACTTGAAAAAGTGGCACCGAGTCGGTGCTTTTTT
4|sgACP6_3|ACP6	ACCAACCTTCAACCCACAGG	0	0	0	0	0	0	0	0	0	51205	ACP6	ACP6	4|sg_hACP6_03|ACP6	ACP6	ACCGACCAACCTTCAACCCACAGGGTTTAAGAGCTATGCTGGAAACAGCATAGCAAGTTTAAATAAGGCTAGTCCGTTATCAACTTGAAAAAGTGGCACCGAGTCGGTGCTTTTTT
4|sgACP6_4|ACP6	GCAGGTCGTGTTTCGACACG	0	0	0	0	0	0	0	0	0	51205	ACP6	ACP6	4|sg_hACP6_04|ACP6	ACP6	ACCGGCAGGTCGTGTTTCGACACGGTTTAAGAGCTATGCTGGAAACAGCATAGCAAGTTTAAATAAGGCTAGTCCGTTATCAACTTGAAAAAGTGGCACCGAGTCGGTGCTTTTTT
4|sgACPP_1|ACPP	AAAGGCAGGTATAGCAACTG	0	0	0	0	0	0	0	0	0	55	ACPP	ACPP	4|sg_hACP3_01|ACP3	ACP3	ACCGAAAGGCAGGTATAGCAACTGGTTTAAGAGCTATGCTGGAAACAGCATAGCAAGTTTAAATAAGGCTAGTCCGTTATCAACTTGAAAAAGTGGCACCGAGTCGGTGCTTTTTT
4|sgACPP_2|ACPP	ACTCCTTGGCTAGTACACTT	5	0	2	2	0	4	1	56251	1	55	ACPP	ACPP	4|sg_hACP3_02|ACP3	ACP3	ACCGACTCCTTGGCTAGTACACTTGTTTAAGAGCTATGCTGGAAACAGCATAGCAAGTTTAAATAAGGCTAGTCCGTTATCAACTTGAAAAAGTGGCACCGAGTCGGTGCTTTTTT
4|sgACPP_3|ACPP	CTACGACCCTTTATATTGTG	0	0	0	0	0	0	0	0	0	55	ACPP	ACPP	4|sg_hACP3_03|ACP3	ACP3	ACCGCTACGACCCTTTATATTGTGGTTTAAGAGCTATGCTGGAAACAGCATAGCAAGTTTAAATAAGGCTAGTCCGTTATCAACTTGAAAAAGTGGCACCGAGTCGGTGCTTTTTT
4|sgACPP_4|ACPP	GCCATGAGGATTCCTTTATG	0	0	0	0	0	0	0	0	1	55	ACPP	ACPP	4|sg_hACP3_04|ACP3	ACP3	ACCGGCCATGAGGATTCCTTTATGGTTTAAGAGCTATGCTGGAAACAGCATAGCAAGTTTAAATAAGGCTAGTCCGTTATCAACTTGAAAAAGTGGCACCGAGTCGGTGCTTTTTT
4|sgACPT_1|ACPT	AGGCTGGTAGTGGAAGACCG	0	0	0	0	0	0	0	0	0	93650	ACPT	ACPT	4|sg_hACP4_01|ACP4	ACP4	ACCGAGGCTGGTAGTGGAAGACCGGTTTAAGAGCTATGCTGGAAACAGCATAGCAAGTTTAAATAAGGCTAGTCCGTTATCAACTTGAAAAAGTGGCACCGAGTCGGTGCTTTTTT
4|sgACPT_2|ACPT	TATCCTTGCAAACTTCTCCC	0	0	0	0	0	0	0	0	0	93650	ACPT	ACPT	4|sg_hACP4_02|ACP4	ACP4	ACCGTATCCTTGCAAACTTCTCCCGTTTAAGAGCTATGCTGGAAACAGCATAGCAAGTTTAAATAAGGCTAGTCCGTTATCAACTTGAAAAAGTGGCACCGAGTCGGTGCTTTTTT
4|sgACPT_3|ACPT	TCGCCATGGCGGAATACCTG	0	0	14742	1	0	0	0	0	0	93650	ACPT	ACPT	4|sg_hACP4_03|ACP4	ACP4	ACCGTCGCCATGGCGGAATACCTGGTTTAAGAGCTATGCTGGAAACAGCATAGCAAGTTTAAATAAGGCTAGTCCGTTATCAACTTGAAAAAGTGGCACCGAGTCGGTGCTTTTTT
4|sgACPT_4|ACPT	TTGGATATTGGAGCCCACGT	0	0	0	0	0	0	0	0	0	93650	ACPT	ACPT	4|sg_hACP4_04|ACP4	ACP4	ACCGTTGGATATTGGAGCCCACGTGTTTAAGAGCTATGCTGGAAACAGCATAGCAAGTTTAAATAAGGCTAGTCCGTTATCAACTTGAAAAAGTGGCACCGAGTCGGTGCTTTTTT
4|sgACR_1|ACR	AAGCGCCCACACGAAATGGG	0	0	0	0	0	0	0	0	0	49	ACR	ACR	4|sg_hACR_01|ACR	ACR	ACCGAAGCGCCCACACGAAATGGGGTTTAAGAGCTATGCTGGAAACAGCATAGCAAGTTTAAATAAGGCTAGTCCGTTATCAACTTGAAAAAGTGGCACCGAGTCGGTGCTTTTTT
4|sgACR_2|ACR	CCCCGACACTTACTCACACG	0	0	0	0	0	0	0	0	0	49	ACR	ACR	4|sg_hACR_02|ACR	ACR	ACCGCCCCGACACTTACTCACACGGTTTAAGAGCTATGCTGGAAACAGCATAGCAAGTTTAAATAAGGCTAGTCCGTTATCAACTTGAAAAAGTGGCACCGAGTCGGTGCTTTTTT
4|sgACR_3|ACR	GAAAGCGCCTATGTGGTCGT	0	0	0	0	0	0	0	0	0	49	ACR	ACR	4|sg_hACR_03|ACR	ACR	ACCGGAAAGCGCCTATGTGGTCGTGTTTAAGAGCTATGCTGGAAACAGCATAGCAAGTTTAAATAAGGCTAGTCCGTTATCAACTTGAAAAAGTGGCACCGAGTCGGTGCTTTTTT
4|sgACR_4|ACR	TAATGTGCATGACTGGAGAC	0	0	0	0	0	0	0	0	0	49	ACR	ACR	4|sg_hACR_04|ACR	ACR	ACCGTAATGTGCATGACTGGAGACGTTTAAGAGCTATGCTGGAAACAGCATAGCAAGTTTAAATAAGGCTAGTCCGTTATCAACTTGAAAAAGTGGCACCGAGTCGGTGCTTTTTT
4|sgACRBP_1|ACRBP	AAGAAGCGTTCGTATTCGGT	0	1	0	3658	0	0	3	0	0	84519	ACRBP	ACRBP	4|sg_hACRBP_01|ACRBP	ACRBP	ACCGAAGAAGCGTTCGTATTCGGTGTTTAAGAGCTATGCTGGAAACAGCATAGCAAGTTTAAATAAGGCTAGTCCGTTATCAACTTGAAAAAGTGGCACCGAGTCGGTGCTTTTTT
4|sgACRBP_2|ACRBP	CAAACCAGGAGGCATAAGGG	0	0	0	0	0	0	0	0	0	84519	ACRBP	ACRBP	4|sg_hACRBP_02|ACRBP	ACRBP	ACCGCAAACCAGGAGGCATAAGGGGTTTAAGAGCTATGCTGGAAACAGCATAGCAAGTTTAAATAAGGCTAGTCCGTTATCAACTTGAAAAAGTGGCACCGAGTCGGTGCTTTTTT
4|sgACRBP_3|ACRBP	GACTCTACTTCTCGTACCCG	0	0	0	0	0	0	0	0	0	84519	ACRBP	ACRBP	4|sg_hACRBP_03|ACRBP	ACRBP	ACCGGACTCTACTTCTCGTACCCGGTTTAAGAGCTATGCTGGAAACAGCATAGCAAGTTTAAATAAGGCTAGTCCGTTATCAACTTGAAAAAGTGGCACCGAGTCGGTGCTTTTTT
4|sgACRBP_4|ACRBP	GGTGCTGTGCTATTCGATCG	0	0	0	0	0	0	0	0	0	84519	ACRBP	ACRBP	4|sg_hACRBP_04|ACRBP	ACRBP	ACCGGGTGCTGTGCTATTCGATCGGTTTAAGAGCTATGCTGGAAACAGCATAGCAAGTTTAAATAAGGCTAGTCCGTTATCAACTTGAAAAAGTGGCACCGAGTCGGTGCTTTTTT
4|sgACRC_1|ACRC	AAACTATTGTGGAGCCACCG	0	0	0	0	0	0	0	0	0	93953	ACRC	ACRC	4|sg_hGCNA_01|GCNA	GCNA	ACCGAAACTATTGTGGAGCCACCGGTTTAAGAGCTATGCTGGAAACAGCATAGCAAGTTTAAATAAGGCTAGTCCGTTATCAACTTGAAAAAGTGGCACCGAGTCGGTGCTTTTTT
4|sgACRC_2|ACRC	CAAACCACCAAGTGATCCTG	0	0	0	0	0	0	0	0	0	93953	ACRC	ACRC	4|sg_hGCNA_02|GCNA	GCNA	ACCGCAAACCACCAAGTGATCCTGGTTTAAGAGCTATGCTGGAAACAGCATAGCAAGTTTAAATAAGGCTAGTCCGTTATCAACTTGAAAAAGTGGCACCGAGTCGGTGCTTTTTT
4|sgACRC_3|ACRC	GCATCCTTAATGTCCAGTCA	0	0	0	0	0	0	0	0	0	93953	ACRC	ACRC	4|sg_hGCNA_03|GCNA	GCNA	ACCGGCATCCTTAATGTCCAGTCAGTTTAAGAGCTATGCTGGAAACAGCATAGCAAGTTTAAATAAGGCTAGTCCGTTATCAACTTGAAAAAGTGGCACCGAGTCGGTGCTTTTTT
4|sgACRC_4|ACRC	TTATTGGAAATAAACAGCGA	0	0	0	0	0	0	0	0	0	93953	ACRC	ACRC	4|sg_hGCNA_04|GCNA	GCNA	ACCGTTATTGGAAATAAACAGCGAGTTTAAGAGCTATGCTGGAAACAGCATAGCAAGTTTAAATAAGGCTAGTCCGTTATCAACTTGAAAAAGTGGCACCGAGTCGGTGCTTTTTT
4|sgACRV1_1|ACRV1	CCTGACTCAAGCTCACTCAA	0	0	0	0	0	0	0	0	0	56	ACRV1	ACRV1	4|sg_hACRV1_01|ACRV1	ACRV1	ACCGCCTGACTCAAGCTCACTCAAGTTTAAGAGCTATGCTGGAAACAGCATAGCAAGTTTAAATAAGGCTAGTCCGTTATCAACTTGAAAAAGTGGCACCGAGTCGGTGCTTTTTT
4|sgACRV1_2|ACRV1	GCTGAAGGTGAGCATACTGT	0	0	0	0	0	0	0	0	0	56	ACRV1	ACRV1	4|sg_hACRV1_02|ACRV1	ACRV1	ACCGGCTGAAGGTGAGCATACTGTGTTTAAGAGCTATGCTGGAAACAGCATAGCAAGTTTAAATAAGGCTAGTCCGTTATCAACTTGAAAAAGTGGCACCGAGTCGGTGCTTTTTT
4|sgACRV1_3|ACRV1	TGGTTCAAGCAAGCACACTG	0	0	0	0	0	0	0	0	0	56	ACRV1	ACRV1	4|sg_hACRV1_03|ACRV1	ACRV1	ACCGTGGTTCAAGCAAGCACACTGGTTTAAGAGCTATGCTGGAAACAGCATAGCAAGTTTAAATAAGGCTAGTCCGTTATCAACTTGAAAAAGTGGCACCGAGTCGGTGCTTTTTT
4|sgACRV1_4|ACRV1	TTCAGGTGAGCACGCTTCAG	0	0	0	0	0	0	0	0	0	56	ACRV1	ACRV1	4|sg_hACRV1_04|ACRV1	ACRV1	ACCGTTCAGGTGAGCACGCTTCAGGTTTAAGAGCTATGCTGGAAACAGCATAGCAAGTTTAAATAAGGCTAGTCCGTTATCAACTTGAAAAAGTGGCACCGAGTCGGTGCTTTTTT
4|sgACSBG1_1|ACSBG1	GAAGGTGAATAATGCCCAGT	0	0	0	0	0	0	0	0	0	23205	ACSBG1	ACSBG1	4|sg_hACSBG1_01|ACSBG1	ACSBG1	ACCGGAAGGTGAATAATGCCCAGTGTTTAAGAGCTATGCTGGAAACAGCATAGCAAGTTTAAATAAGGCTAGTCCGTTATCAACTTGAAAAAGTGGCACCGAGTCGGTGCTTTTTT
4|sgACSBG1_2|ACSBG1	GGAGCCCACATCACACATGG	0	0	0	0	0	0	0	0	0	23205	ACSBG1	ACSBG1	4|sg_hACSBG1_02|ACSBG1	ACSBG1	ACCGGGAGCCCACATCACACATGGGTTTAAGAGCTATGCTGGAAACAGCATAGCAAGTTTAAATAAGGCTAGTCCGTTATCAACTTGAAAAAGTGGCACCGAGTCGGTGCTTTTTT
4|sgACSBG1_3|ACSBG1	TCAAAAGAACTTCTATGGAG	0	0	0	0	0	0	0	0	0	23205	ACSBG1	ACSBG1	4|sg_hACSBG1_03|ACSBG1	ACSBG1	ACCGTCAAAAGAACTTCTATGGAGGTTTAAGAGCTATGCTGGAAACAGCATAGCAAGTTTAAATAAGGCTAGTCCGTTATCAACTTGAAAAAGTGGCACCGAGTCGGTGCTTTTTT
4|sgACSBG1_4|ACSBG1	TGTGCATCGGATGTTCTACG	0	0	0	0	0	0	0	0	0	23205	ACSBG1	ACSBG1	4|sg_hACSBG1_04|ACSBG1	ACSBG1	ACCGTGTGCATCGGATGTTCTACGGTTTAAGAGCTATGCTGGAAACAGCATAGCAAGTTTAAATAAGGCTAGTCCGTTATCAACTTGAAAAAGTGGCACCGAGTCGGTGCTTTTTT
4|sgACSBG2_1|ACSBG2	AAATTCAGGGATGGTCATCG	0	0	0	0	0	0	0	0	0	81616	ACSBG2	ACSBG2	4|sg_hACSBG2_01|ACSBG2	ACSBG2	ACCGAAATTCAGGGATGGTCATCGGTTTAAGAGCTATGCTGGAAACAGCATAGCAAGTTTAAATAAGGCTAGTCCGTTATCAACTTGAAAAAGTGGCACCGAGTCGGTGCTTTTTT
4|sgACSBG2_2|ACSBG2	ACACGAGAGTCTTAGCCATG	0	0	0	0	0	0	0	0	0	81616	ACSBG2	ACSBG2	4|sg_hACSBG2_02|ACSBG2	ACSBG2	ACCGACACGAGAGTCTTAGCCATGGTTTAAGAGCTATGCTGGAAACAGCATAGCAAGTTTAAATAAGGCTAGTCCGTTATCAACTTGAAAAAGTGGCACCGAGTCGGTGCTTTTTT
4|sgACSBG2_3|ACSBG2	GGGACCACAGGCATACCCAA	0	0	0	0	0	0	0	0	0	81616	ACSBG2	ACSBG2	4|sg_hACSBG2_03|ACSBG2	ACSBG2	ACCGGGGACCACAGGCATACCCAAGTTTAAGAGCTATGCTGGAAACAGCATAGCAAGTTTAAATAAGGCTAGTCCGTTATCAACTTGAAAAAGTGGCACCGAGTCGGTGCTTTTTT
4|sgACSBG2_4|ACSBG2	TCCATGAAATCATCCCACTG	0	0	0	0	0	0	0	0	0	81616	ACSBG2	ACSBG2	4|sg_hACSBG2_04|ACSBG2	ACSBG2	ACCGTCCATGAAATCATCCCACTGGTTTAAGAGCTATGCTGGAAACAGCATAGCAAGTTTAAATAAGGCTAGTCCGTTATCAACTTGAAAAAGTGGCACCGAGTCGGTGCTTTTTT
4|sgACSF2_1|ACSF2	ACGTAGCTGAGGCCTCCGAT	0	0	0	0	0	0	0	0	0	80221	ACSF2	ACSF2	4|sg_hACSF2_01|ACSF2	ACSF2	ACCGACGTAGCTGAGGCCTCCGATGTTTAAGAGCTATGCTGGAAACAGCATAGCAAGTTTAAATAAGGCTAGTCCGTTATCAACTTGAAAAAGTGGCACCGAGTCGGTGCTTTTTT
4|sgACSF2_2|ACSF2	ATGGCTCGGATCAACTCTGG	0	0	0	0	0	0	0	0	0	80221	ACSF2	ACSF2	4|sg_hACSF2_02|ACSF2	ACSF2	ACCGATGGCTCGGATCAACTCTGGGTTTAAGAGCTATGCTGGAAACAGCATAGCAAGTTTAAATAAGGCTAGTCCGTTATCAACTTGAAAAAGTGGCACCGAGTCGGTGCTTTTTT
4|sgACSF2_3|ACSF2	CGTGGGGGTACCATACAGGA	0	0	0	0	0	0	0	0	0	80221	ACSF2	ACSF2	4|sg_hACSF2_03|ACSF2	ACSF2	ACCGCGTGGGGGTACCATACAGGAGTTTAAGAGCTATGCTGGAAACAGCATAGCAAGTTTAAATAAGGCTAGTCCGTTATCAACTTGAAAAAGTGGCACCGAGTCGGTGCTTTTTT
4|sgACSF2_4|ACSF2	GTCTTCATGGAGGACGACCA	0	0	0	0	0	0	0	0	0	80221	ACSF2	ACSF2	4|sg_hACSF2_04|ACSF2	ACSF2	ACCGGTCTTCATGGAGGACGACCAGTTTAAGAGCTATGCTGGAAACAGCATAGCAAGTTTAAATAAGGCTAGTCCGTTATCAACTTGAAAAAGTGGCACCGAGTCGGTGCTTTTTT
4|sgACSF3_1|ACSF3	CCATGATCATCTACACCAGT	0	0	0	0	0	0	0	0	0	197322	ACSF3	ACSF3	4|sg_hACSF3_01|ACSF3	ACSF3	ACCGCCATGATCATCTACACCAGTGTTTAAGAGCTATGCTGGAAACAGCATAGCAAGTTTAAATAAGGCTAGTCCGTTATCAACTTGAAAAAGTGGCACCGAGTCGGTGCTTTTTT
4|sgACSF3_2|ACSF3	GCAGCGCGTTGACCACACCA	0	0	0	0	0	0	0	0	0	197322	ACSF3	ACSF3	4|sg_hACSF3_02|ACSF3	ACSF3	ACCGGCAGCGCGTTGACCACACCAGTTTAAGAGCTATGCTGGAAACAGCATAGCAAGTTTAAATAAGGCTAGTCCGTTATCAACTTGAAAAAGTGGCACCGAGTCGGTGCTTTTTT
4|sgACSF3_3|ACSF3	TAACGATGCCTCCTACGTCG	0	0	0	0	0	0	0	0	0	197322	ACSF3	ACSF3	4|sg_hACSF3_03|ACSF3	ACSF3	ACCGTAACGATGCCTCCTACGTCGGTTTAAGAGCTATGCTGGAAACAGCATAGCAAGTTTAAATAAGGCTAGTCCGTTATCAACTTGAAAAAGTGGCACCGAGTCGGTGCTTTTTT
4|sgACSF3_4|ACSF3	TCTTAAGTTCTGAAACGCCG	0	0	0	0	1	0	0	0	1	197322	ACSF3	ACSF3	4|sg_hACSF3_04|ACSF3	ACSF3	ACCGTCTTAAGTTCTGAAACGCCGGTTTAAGAGCTATGCTGGAAACAGCATAGCAAGTTTAAATAAGGCTAGTCCGTTATCAACTTGAAAAAGTGGCACCGAGTCGGTGCTTTTTT
4|sgACSL1_1|ACSL1	ATCACGTACATAGTCAACAA	0	0	0	0	0	0	0	0	0	2180	ACSL1	ACSL1	4|sg_hACSL1_01|ACSL1	ACSL1	ACCGATCACGTACATAGTCAACAAGTTTAAGAGCTATGCTGGAAACAGCATAGCAAGTTTAAATAAGGCTAGTCCGTTATCAACTTGAAAAAGTGGCACCGAGTCGGTGCTTTTTT
4|sgACSL1_2|ACSL1	CAAGAGCCATCGCTTCAGCG	0	0	0	0	0	0	0	0	0	2180	ACSL1	ACSL1	4|sg_hACSL1_02|ACSL1	ACSL1	ACCGCAAGAGCCATCGCTTCAGCGGTTTAAGAGCTATGCTGGAAACAGCATAGCAAGTTTAAATAAGGCTAGTCCGTTATCAACTTGAAAAAGTGGCACCGAGTCGGTGCTTTTTT
4|sgACSL1_3|ACSL1	GATGCCAATGAACTGATCTG	0	0	0	0	0	0	0	0	0	2180	ACSL1	ACSL1	4|sg_hACSL1_03|ACSL1	ACSL1	ACCGGATGCCAATGAACTGATCTGGTTTAAGAGCTATGCTGGAAACAGCATAGCAAGTTTAAATAAGGCTAGTCCGTTATCAACTTGAAAAAGTGGCACCGAGTCGGTGCTTTTTT
4|sgACSL1_4|ACSL1	GTTTCCGAGAGCCTAAACAA	0	0	0	0	0	0	0	0	0	2180	ACSL1	ACSL1	4|sg_hACSL1_04|ACSL1	ACSL1	ACCGGTTTCCGAGAGCCTAAACAAGTTTAAGAGCTATGCTGGAAACAGCATAGCAAGTTTAAATAAGGCTAGTCCGTTATCAACTTGAAAAAGTGGCACCGAGTCGGTGCTTTTTT
4|sgACSL3_1|ACSL3	ATGATTACTGCAATATCTGA	0	0	0	0	0	0	0	0	0	2181	ACSL3	ACSL3	4|sg_hACSL3_01|ACSL3	ACSL3	ACCGATGATTACTGCAATATCTGAGTTTAAGAGCTATGCTGGAAACAGCATAGCAAGTTTAAATAAGGCTAGTCCGTTATCAACTTGAAAAAGTGGCACCGAGTCGGTGCTTTTTT
4|sgACSL3_2|ACSL3	GAAAGTTCGAAGCTTGCTAG	0	0	0	0	0	0	0	0	0	2181	ACSL3	ACSL3	4|sg_hACSL3_02|ACSL3	ACSL3	ACCGGAAAGTTCGAAGCTTGCTAGGTTTAAGAGCTATGCTGGAAACAGCATAGCAAGTTTAAATAAGGCTAGTCCGTTATCAACTTGAAAAAGTGGCACCGAGTCGGTGCTTTTTT
4|sgACSL3_3|ACSL3	GTGGTGAAGAGTAACCAATG	0	0	0	0	0	0	0	0	0	2181	ACSL3	ACSL3	4|sg_hACSL3_03|ACSL3	ACSL3	ACCGGTGGTGAAGAGTAACCAATGGTTTAAGAGCTATGCTGGAAACAGCATAGCAAGTTTAAATAAGGCTAGTCCGTTATCAACTTGAAAAAGTGGCACCGAGTCGGTGCTTTTTT
4|sgACSL3_4|ACSL3	TATCTAAAGTATCACATCCA	0	0	0	0	0	0	0	0	0	2181	ACSL3	ACSL3	4|sg_hACSL3_04|ACSL3	ACSL3	ACCGTATCTAAAGTATCACATCCAGTTTAAGAGCTATGCTGGAAACAGCATAGCAAGTTTAAATAAGGCTAGTCCGTTATCAACTTGAAAAAGTGGCACCGAGTCGGTGCTTTTTT
4|sgACSL4_1|ACSL4	AAGCCCACTTCAGACAAACC	0	0	0	0	0	0	0	0	0	2182	ACSL4	ACSL4	4|sg_hACSL4_01|ACSL4	ACSL4	ACCGAAGCCCACTTCAGACAAACCGTTTAAGAGCTATGCTGGAAACAGCATAGCAAGTTTAAATAAGGCTAGTCCGTTATCAACTTGAAAAAGTGGCACCGAGTCGGTGCTTTTTT
4|sgACSL4_2|ACSL4	ACCTGGTCAGAGAGTGTAAG	0	0	0	0	0	0	0	0	0	2182	ACSL4	ACSL4	4|sg_hACSL4_02|ACSL4	ACSL4	ACCGACCTGGTCAGAGAGTGTAAGGTTTAAGAGCTATGCTGGAAACAGCATAGCAAGTTTAAATAAGGCTAGTCCGTTATCAACTTGAAAAAGTGGCACCGAGTCGGTGCTTTTTT
4|sgACSL4_3|ACSL4	GCATCATCACTCCCTTAGGT	0	0	0	0	0	0	0	0	0	2182	ACSL4	ACSL4	4|sg_hACSL4_03|ACSL4	ACSL4	ACCGGCATCATCACTCCCTTAGGTGTTTAAGAGCTATGCTGGAAACAGCATAGCAAGTTTAAATAAGGCTAGTCCGTTATCAACTTGAAAAAGTGGCACCGAGTCGGTGCTTTTTT
4|sgACSL4_4|ACSL4	GTGTGTCTGAGGAGATAGCG	0	0	0	0	0	0	0	0	0	2182	ACSL4	ACSL4	4|sg_hACSL4_04|ACSL4	ACSL4	ACCGGTGTGTCTGAGGAGATAGCGGTTTAAGAGCTATGCTGGAAACAGCATAGCAAGTTTAAATAAGGCTAGTCCGTTATCAACTTGAAAAAGTGGCACCGAGTCGGTGCTTTTTT
4|sgACSL5_1|ACSL5	CAGAGTTGGATTCTTCCAAG	0	0	0	0	0	1	0	0	0	51703	ACSL5	ACSL5	4|sg_hACSL5_01|ACSL5	ACSL5	ACCGCAGAGTTGGATTCTTCCAAGGTTTAAGAGCTATGCTGGAAACAGCATAGCAAGTTTAAATAAGGCTAGTCCGTTATCAACTTGAAAAAGTGGCACCGAGTCGGTGCTTTTTT
4|sgACSL5_2|ACSL5	CTTATCCCTATATGATGCTG	0	0	0	0	0	0	0	0	0	51703	ACSL5	ACSL5	4|sg_hACSL5_02|ACSL5	ACSL5	ACCGCTTATCCCTATATGATGCTGGTTTAAGAGCTATGCTGGAAACAGCATAGCAAGTTTAAATAAGGCTAGTCCGTTATCAACTTGAAAAAGTGGCACCGAGTCGGTGCTTTTTT
4|sgACSL5_3|ACSL5	CTTGTTGACAATATGTACGA	0	0	0	0	0	0	0	0	0	51703	ACSL5	ACSL5	4|sg_hACSL5_03|ACSL5	ACSL5	ACCGCTTGTTGACAATATGTACGAGTTTAAGAGCTATGCTGGAAACAGCATAGCAAGTTTAAATAAGGCTAGTCCGTTATCAACTTGAAAAAGTGGCACCGAGTCGGTGCTTTTTT
4|sgACSL5_4|ACSL5	TCTGATAGAGCAGAGTACCT	0	0	0	0	0	1	0	0	0	51703	ACSL5	ACSL5	4|sg_hACSL5_04|ACSL5	ACSL5	ACCGTCTGATAGAGCAGAGTACCTGTTTAAGAGCTATGCTGGAAACAGCATAGCAAGTTTAAATAAGGCTAGTCCGTTATCAACTTGAAAAAGTGGCACCGAGTCGGTGCTTTTTT
4|sgACSL6_1|ACSL6	CTGAGATGCTAAGCCCACGG	0	0	0	0	0	0	0	0	0	23305	ACSL6	ACSL6	4|sg_hACSL6_01|ACSL6	ACSL6	ACCGCTGAGATGCTAAGCCCACGGGTTTAAGAGCTATGCTGGAAACAGCATAGCAAGTTTAAATAAGGCTAGTCCGTTATCAACTTGAAAAAGTGGCACCGAGTCGGTGCTTTTTT
4|sgACSL6_2|ACSL6	GATGCTCACCCATGGGAACG	0	0	0	0	0	0	0	0	0	23305	ACSL6	ACSL6	4|sg_hACSL6_02|ACSL6	ACSL6	ACCGGATGCTCACCCATGGGAACGGTTTAAGAGCTATGCTGGAAACAGCATAGCAAGTTTAAATAAGGCTAGTCCGTTATCAACTTGAAAAAGTGGCACCGAGTCGGTGCTTTTTT
4|sgACSL6_3|ACSL6	TCTGTCGTCTATTGCCACGG	0	0	0	0	0	0	0	0	0	23305	ACSL6	ACSL6	4|sg_hACSL6_03|ACSL6	ACSL6	ACCGTCTGTCGTCTATTGCCACGGGTTTAAGAGCTATGCTGGAAACAGCATAGCAAGTTTAAATAAGGCTAGTCCGTTATCAACTTGAAAAAGTGGCACCGAGTCGGTGCTTTTTT
4|sgACSL6_4|ACSL6	GGGTGGTGGCCGAGAGGCTG	1	0	0	0	0	0	0	0	0	23305	ACSL6	ACSL6	4|sg_hACSL6_04|ACSL6	ACSL6	ACCGGGGTGGTGGCCGAGAGGCTGGTTTAAGAGCTATGCTGGAAACAGCATAGCAAGTTTAAATAAGGCTAGTCCGTTATCAACTTGAAAAAGTGGCACCGAGTCGGTGCTTTTTT
4|sgACSM1_1|ACSM1	CAAGGTCTTTGACTTAACAC	0	0	0	0	0	0	0	0	0	116285	ACSM1	ACSM1	4|sg_hACSM1_01|ACSM1	ACSM1	ACCGCAAGGTCTTTGACTTAACACGTTTAAGAGCTATGCTGGAAACAGCATAGCAAGTTTAAATAAGGCTAGTCCGTTATCAACTTGAAAAAGTGGCACCGAGTCGGTGCTTTTTT
4|sgACSM1_2|ACSM1	CCCCCCAAAAGTGGTTAATG	0	0	0	0	0	0	0	0	0	116285	ACSM1	ACSM1	4|sg_hACSM1_02|ACSM1	ACSM1	ACCGCCCCCCAAAAGTGGTTAATGGTTTAAGAGCTATGCTGGAAACAGCATAGCAAGTTTAAATAAGGCTAGTCCGTTATCAACTTGAAAAAGTGGCACCGAGTCGGTGCTTTTTT
4|sgACSM1_3|ACSM1	CGCTGTCCATGGTTCTACCA	0	0	0	0	0	0	0	0	0	116285	ACSM1	ACSM1	4|sg_hACSM1_03|ACSM1	ACSM1	ACCGCGCTGTCCATGGTTCTACCAGTTTAAGAGCTATGCTGGAAACAGCATAGCAAGTTTAAATAAGGCTAGTCCGTTATCAACTTGAAAAAGTGGCACCGAGTCGGTGCTTTTTT
4|sgACSM1_4|ACSM1	GCACTGCTATACTGGCGGGG	0	0	0	0	0	0	0	0	0	116285	ACSM1	ACSM1	4|sg_hACSM1_04|ACSM1	ACSM1	ACCGGCACTGCTATACTGGCGGGGGTTTAAGAGCTATGCTGGAAACAGCATAGCAAGTTTAAATAAGGCTAGTCCGTTATCAACTTGAAAAAGTGGCACCGAGTCGGTGCTTTTTT
4|sgACSM2A_1|ACSM2A	ACAGGCTCCCGAGAGGACGT	0	0	0	0	0	0	0	0	0	123876	ACSM2A	ACSM2A	4|sg_hACSM2A_01|ACSM2A	ACSM2A	ACCGACAGGCTCCCGAGAGGACGTGTTTAAGAGCTATGCTGGAAACAGCATAGCAAGTTTAAATAAGGCTAGTCCGTTATCAACTTGAAAAAGTGGCACCGAGTCGGTGCTTTTTT
4|sgACSM2A_2|ACSM2A	GTGCATGCTCCTAATGCCCA	0	0	0	0	0	0	0	0	0	123876	ACSM2A	ACSM2A	4|sg_hACSM2A_02|ACSM2A	ACSM2A	ACCGGTGCATGCTCCTAATGCCCAGTTTAAGAGCTATGCTGGAAACAGCATAGCAAGTTTAAATAAGGCTAGTCCGTTATCAACTTGAAAAAGTGGCACCGAGTCGGTGCTTTTTT
4|sgACSM2A_3|ACSM2A	TGACGCAGTTCTGTAGATGG	0	0	0	0	0	0	0	0	0	123876	ACSM2A	ACSM2A	4|sg_hACSM2A_03|ACSM2A	ACSM2A	ACCGTGACGCAGTTCTGTAGATGGGTTTAAGAGCTATGCTGGAAACAGCATAGCAAGTTTAAATAAGGCTAGTCCGTTATCAACTTGAAAAAGTGGCACCGAGTCGGTGCTTTTTT
4|sgACSM2A_4|ACSM2A	TGTCTGAGAAAAGCTGTGAT	0	0	0	0	0	0	0	0	0	123876	ACSM2A	ACSM2A	4|sg_hACSM2A_04|ACSM2A	ACSM2A	ACCGTGTCTGAGAAAAGCTGTGATGTTTAAGAGCTATGCTGGAAACAGCATAGCAAGTTTAAATAAGGCTAGTCCGTTATCAACTTGAAAAAGTGGCACCGAGTCGGTGCTTTTTT
4|sgACSM2B_1|ACSM2B	ATGTGGACCATATCAGACAC	0	0	44435	0	1	0	0	0	0	348158	ACSM2B	ACSM2B	4|sg_hACSM2B_01|ACSM2B	ACSM2B	ACCGATGTGGACCATATCAGACACGTTTAAGAGCTATGCTGGAAACAGCATAGCAAGTTTAAATAAGGCTAGTCCGTTATCAACTTGAAAAAGTGGCACCGAGTCGGTGCTTTTTT
4|sgACSM2B_2|ACSM2B	GAAGGGACTCCCCTCCAGCG	0	0	0	0	0	0	0	0	0	348158	ACSM2B	ACSM2B	4|sg_hACSM2B_02|ACSM2B	ACSM2B	ACCGGAAGGGACTCCCCTCCAGCGGTTTAAGAGCTATGCTGGAAACAGCATAGCAAGTTTAAATAAGGCTAGTCCGTTATCAACTTGAAAAAGTGGCACCGAGTCGGTGCTTTTTT
4|sgACSM2B_3|ACSM2B	TGTCTGAGAAAAGCTGCGAT	0	0	0	0	0	0	0	0	0	348158	ACSM2B	ACSM2B	4|sg_hACSM2B_03|ACSM2B	ACSM2B	ACCGTGTCTGAGAAAAGCTGCGATGTTTAAGAGCTATGCTGGAAACAGCATAGCAAGTTTAAATAAGGCTAGTCCGTTATCAACTTGAAAAAGTGGCACCGAGTCGGTGCTTTTTT
4|sgACSM2B_4|ACSM2B	TTACCTTTAGAATAACCAGT	0	0	0	0	0	0	0	0	0	348158	ACSM2B	ACSM2B	4|sg_hACSM2B_04|ACSM2B	ACSM2B	ACCGTTACCTTTAGAATAACCAGTGTTTAAGAGCTATGCTGGAAACAGCATAGCAAGTTTAAATAAGGCTAGTCCGTTATCAACTTGAAAAAGTGGCACCGAGTCGGTGCTTTTTT
4|sgACSM3_1|ACSM3	ATTTCTGTTGATCCACCAGA	0	0	0	0	0	0	0	0	0	6296	ACSM3	ACSM3	4|sg_hACSM3_01|ACSM3	ACSM3	ACCGATTTCTGTTGATCCACCAGAGTTTAAGAGCTATGCTGGAAACAGCATAGCAAGTTTAAATAAGGCTAGTCCGTTATCAACTTGAAAAAGTGGCACCGAGTCGGTGCTTTTTT
4|sgACSM3_2|ACSM3	GAAGCCTGTTCCCTACAAAG	0	0	0	0	0	0	0	0	0	6296	ACSM3	ACSM3	4|sg_hACSM3_02|ACSM3	ACSM3	ACCGGAAGCCTGTTCCCTACAAAGGTTTAAGAGCTATGCTGGAAACAGCATAGCAAGTTTAAATAAGGCTAGTCCGTTATCAACTTGAAAAAGTGGCACCGAGTCGGTGCTTTTTT
4|sgACSM3_3|ACSM3	TGAAACAGGACTTCAAACTG	0	0	0	0	0	0	0	0	0	6296	ACSM3	ACSM3	4|sg_hACSM3_03|ACSM3	ACSM3	ACCGTGAAACAGGACTTCAAACTGGTTTAAGAGCTATGCTGGAAACAGCATAGCAAGTTTAAATAAGGCTAGTCCGTTATCAACTTGAAAAAGTGGCACCGAGTCGGTGCTTTTTT
4|sgACSM3_4|ACSM3	TGCAACAGCGTCTACTGCTG	0	0	0	0	0	0	0	0	0	6296	ACSM3	ACSM3	4|sg_hACSM3_04|ACSM3	ACSM3	ACCGTGCAACAGCGTCTACTGCTGGTTTAAGAGCTATGCTGGAAACAGCATAGCAAGTTTAAATAAGGCTAGTCCGTTATCAACTTGAAAAAGTGGCACCGAGTCGGTGCTTTTTT
4|sgACSM4_1|ACSM4	AGAGGGTGAACCCAATGCCG	0	0	0	0	0	0	0	0	0	341392	ACSM4	ACSM4	4|sg_hACSM4_01|ACSM4	ACSM4	ACCGAGAGGGTGAACCCAATGCCGGTTTAAGAGCTATGCTGGAAACAGCATAGCAAGTTTAAATAAGGCTAGTCCGTTATCAACTTGAAAAAGTGGCACCGAGTCGGTGCTTTTTT
4|sgACSM4_2|ACSM4	CACGAGCATCCGGTACACAG	0	0	0	0	0	0	0	0	0	341392	ACSM4	ACSM4	4|sg_hACSM4_02|ACSM4	ACSM4	ACCGCACGAGCATCCGGTACACAGGTTTAAGAGCTATGCTGGAAACAGCATAGCAAGTTTAAATAAGGCTAGTCCGTTATCAACTTGAAAAAGTGGCACCGAGTCGGTGCTTTTTT
4|sgACSM4_3|ACSM4	CATTCGATGCACAAAAACAC	0	0	0	0	0	0	0	0	0	341392	ACSM4	ACSM4	4|sg_hACSM4_03|ACSM4	ACSM4	ACCGCATTCGATGCACAAAAACACGTTTAAGAGCTATGCTGGAAACAGCATAGCAAGTTTAAATAAGGCTAGTCCGTTATCAACTTGAAAAAGTGGCACCGAGTCGGTGCTTTTTT
4|sgACSM4_4|ACSM4	TACAATGGACTCCACCGCTG	0	0	16093	1	1	0	0	1	1	341392	ACSM4	ACSM4	4|sg_hACSM4_04|ACSM4	ACSM4	ACCGTACAATGGACTCCACCGCTGGTTTAAGAGCTATGCTGGAAACAGCATAGCAAGTTTAAATAAGGCTAGTCCGTTATCAACTTGAAAAAGTGGCACCGAGTCGGTGCTTTTTT
4|sgACSM5_1|ACSM5	ATAACTTTGGCATCAACTCG	0	0	0	0	0	0	0	0	0	54988	ACSM5	ACSM5	4|sg_hACSM5_01|ACSM5	ACSM5	ACCGATAACTTTGGCATCAACTCGGTTTAAGAGCTATGCTGGAAACAGCATAGCAAGTTTAAATAAGGCTAGTCCGTTATCAACTTGAAAAAGTGGCACCGAGTCGGTGCTTTTTT
4|sgACSM5_2|ACSM5	CTTTACCAGCGGAACCACCG	0	0	0	0	0	0	0	0	0	54988	ACSM5	ACSM5	4|sg_hACSM5_02|ACSM5	ACSM5	ACCGCTTTACCAGCGGAACCACCGGTTTAAGAGCTATGCTGGAAACAGCATAGCAAGTTTAAATAAGGCTAGTCCGTTATCAACTTGAAAAAGTGGCACCGAGTCGGTGCTTTTTT
4|sgACSM5_3|ACSM5	GTGGAAACACCAGACTGGTG	0	0	0	0	0	0	0	0	0	54988	ACSM5	ACSM5	4|sg_hACSM5_03|ACSM5	ACSM5	ACCGGTGGAAACACCAGACTGGTGGTTTAAGAGCTATGCTGGAAACAGCATAGCAAGTTTAAATAAGGCTAGTCCGTTATCAACTTGAAAAAGTGGCACCGAGTCGGTGCTTTTTT
4|sgACSM5_4|ACSM5	TGGTCAGTGTGGCTTGCATG	0	0	0	0	0	0	0	0	0	54988	ACSM5	ACSM5	4|sg_hACSM5_04|ACSM5	ACSM5	ACCGTGGTCAGTGTGGCTTGCATGGTTTAAGAGCTATGCTGGAAACAGCATAGCAAGTTTAAATAAGGCTAGTCCGTTATCAACTTGAAAAAGTGGCACCGAGTCGGTGCTTTTTT
4|sgACSM6_1|ACSM6	CAGGGATAAAGATCCACCAA	0	0	0	0	0	0	0	0	0	142827	ACSM6	ACSM6	4|sg_hACSM6_01|ACSM6	ACSM6	ACCGCAGGGATAAAGATCCACCAAGTTTAAGAGCTATGCTGGAAACAGCATAGCAAGTTTAAATAAGGCTAGTCCGTTATCAACTTGAAAAAGTGGCACCGAGTCGGTGCTTTTTT
4|sgACSM6_2|ACSM6	CCTGCCTAGGACGGACTCAG	0	0	0	0	0	0	0	0	0	142827	ACSM6	ACSM6	4|sg_hACSM6_02|ACSM6	ACSM6	ACCGCCTGCCTAGGACGGACTCAGGTTTAAGAGCTATGCTGGAAACAGCATAGCAAGTTTAAATAAGGCTAGTCCGTTATCAACTTGAAAAAGTGGCACCGAGTCGGTGCTTTTTT
4|sgACSM6_3|ACSM6	TGTCAGATAAGAGCTATGAT	0	0	0	0	0	0	0	0	0	142827	ACSM6	ACSM6	4|sg_hACSM6_03|ACSM6	ACSM6	ACCGTGTCAGATAAGAGCTATGATGTTTAAGAGCTATGCTGGAAACAGCATAGCAAGTTTAAATAAGGCTAGTCCGTTATCAACTTGAAAAAGTGGCACCGAGTCGGTGCTTTTTT
4|sgACSM6_4|ACSM6	TTTGCAGATAGAGTGGTGAT	0	0	0	0	0	0	0	0	0	142827	ACSM6	ACSM6	4|sg_hACSM6_04|ACSM6	ACSM6	ACCGTTTGCAGATAGAGTGGTGATGTTTAAGAGCTATGCTGGAAACAGCATAGCAAGTTTAAATAAGGCTAGTCCGTTATCAACTTGAAAAAGTGGCACCGAGTCGGTGCTTTTTT
4|sgACSS1_1|ACSS1	ACCAGCATTGGGATAAACTG	0	0	0	0	0	0	0	0	0	84532	ACSS1	ACSS1	4|sg_hACSS1_01|ACSS1	ACSS1	ACCGACCAGCATTGGGATAAACTGGTTTAAGAGCTATGCTGGAAACAGCATAGCAAGTTTAAATAAGGCTAGTCCGTTATCAACTTGAAAAAGTGGCACCGAGTCGGTGCTTTTTT
4|sgACSS1_2|ACSS1	CAGACAACAAGGTCCACATG	0	0	0	0	0	0	0	0	0	84532	ACSS1	ACSS1	4|sg_hACSS1_02|ACSS1	ACSS1	ACCGCAGACAACAAGGTCCACATGGTTTAAGAGCTATGCTGGAAACAGCATAGCAAGTTTAAATAAGGCTAGTCCGTTATCAACTTGAAAAAGTGGCACCGAGTCGGTGCTTTTTT
4|sgACSS1_3|ACSS1	GATCAAAGCAACGCTCTCGG	0	0	0	0	0	0	0	0	0	84532	ACSS1	ACSS1	4|sg_hACSS1_03|ACSS1	ACSS1	ACCGGATCAAAGCAACGCTCTCGGGTTTAAGAGCTATGCTGGAAACAGCATAGCAAGTTTAAATAAGGCTAGTCCGTTATCAACTTGAAAAAGTGGCACCGAGTCGGTGCTTTTTT
4|sgACSS1_4|ACSS1	GCTGAAATACGGTGATGCCT	0	0	0	0	0	0	0	0	0	84532	ACSS1	ACSS1	4|sg_hACSS1_04|ACSS1	ACSS1	ACCGGCTGAAATACGGTGATGCCTGTTTAAGAGCTATGCTGGAAACAGCATAGCAAGTTTAAATAAGGCTAGTCCGTTATCAACTTGAAAAAGTGGCACCGAGTCGGTGCTTTTTT
4|sgACSS2_1|ACSS2	CAGGAAGGGGAGTCAACATG	0	0	0	0	0	0	0	0	1	55902	ACSS2	ACSS2	4|sg_hACSS2_01|ACSS2	ACSS2	ACCGCAGGAAGGGGAGTCAACATGGTTTAAGAGCTATGCTGGAAACAGCATAGCAAGTTTAAATAAGGCTAGTCCGTTATCAACTTGAAAAAGTGGCACCGAGTCGGTGCTTTTTT
4|sgACSS2_2|ACSS2	CAGTGGCCCATAGGTGACGT	0	0	0	0	0	0	0	0	0	55902	ACSS2	ACSS2	4|sg_hACSS2_02|ACSS2	ACSS2	ACCGCAGTGGCCCATAGGTGACGTGTTTAAGAGCTATGCTGGAAACAGCATAGCAAGTTTAAATAAGGCTAGTCCGTTATCAACTTGAAAAAGTGGCACCGAGTCGGTGCTTTTTT
4|sgACSS2_3|ACSS2	GCATTGTGGTCAAGCACCTG	0	0	0	0	0	0	0	0	0	55902	ACSS2	ACSS2	4|sg_hACSS2_03|ACSS2	ACSS2	ACCGGCATTGTGGTCAAGCACCTGGTTTAAGAGCTATGCTGGAAACAGCATAGCAAGTTTAAATAAGGCTAGTCCGTTATCAACTTGAAAAAGTGGCACCGAGTCGGTGCTTTTTT
4|sgACSS2_4|ACSS2	GGAACCAAGGGATTGACTTG	0	0	0	0	0	0	0	0	0	55902	ACSS2	ACSS2	4|sg_hACSS2_04|ACSS2	ACSS2	ACCGGGAACCAAGGGATTGACTTGGTTTAAGAGCTATGCTGGAAACAGCATAGCAAGTTTAAATAAGGCTAGTCCGTTATCAACTTGAAAAAGTGGCACCGAGTCGGTGCTTTTTT
4|sgACSS3_1|ACSS3	ACATGGTATACATCGCCTGT	0	0	0	1	0	0	0	0	0	79611	ACSS3	ACSS3	4|sg_hACSS3_01|ACSS3	ACSS3	ACCGACATGGTATACATCGCCTGTGTTTAAGAGCTATGCTGGAAACAGCATAGCAAGTTTAAATAAGGCTAGTCCGTTATCAACTTGAAAAAGTGGCACCGAGTCGGTGCTTTTTT
4|sgACSS3_2|ACSS3	CCGGGACCACTAAAGCCCTG	0	0	0	0	0	0	0	0	0	79611	ACSS3	ACSS3	4|sg_hACSS3_02|ACSS3	ACSS3	ACCGCCGGGACCACTAAAGCCCTGGTTTAAGAGCTATGCTGGAAACAGCATAGCAAGTTTAAATAAGGCTAGTCCGTTATCAACTTGAAAAAGTGGCACCGAGTCGGTGCTTTTTT
4|sgACSS3_3|ACSS3	CTTGTACCAGCTGATCTGCT	0	0	0	0	0	0	0	0	0	79611	ACSS3	ACSS3	4|sg_hACSS3_03|ACSS3	ACSS3	ACCGCTTGTACCAGCTGATCTGCTGTTTAAGAGCTATGCTGGAAACAGCATAGCAAGTTTAAATAAGGCTAGTCCGTTATCAACTTGAAAAAGTGGCACCGAGTCGGTGCTTTTTT
4|sgACSS3_4|ACSS3	GGTGTGATTAGGCCCACTGG	0	0	0	0	0	0	0	0	0	79611	ACSS3	ACSS3	4|sg_hACSS3_04|ACSS3	ACSS3	ACCGGGTGTGATTAGGCCCACTGGGTTTAAGAGCTATGCTGGAAACAGCATAGCAAGTTTAAATAAGGCTAGTCCGTTATCAACTTGAAAAAGTGGCACCGAGTCGGTGCTTTTTT
4|sgACTA1_1|ACTA1	CTTCTACAACGAGCTTCGCG	0	0	0	0	0	0	0	0	0	58	ACTA1	ACTA1	4|sg_hACTA1_01|ACTA1	ACTA1	ACCGCTTCTACAACGAGCTTCGCGGTTTAAGAGCTATGCTGGAAACAGCATAGCAAGTTTAAATAAGGCTAGTCCGTTATCAACTTGAAAAAGTGGCACCGAGTCGGTGCTTTTTT
4|sgACTA1_2|ACTA1	GGGTCAGAAAGATTCCTACG	1	0	0	4	0	0	10705	0	0	58	ACTA1	ACTA1	4|sg_hACTA1_02|ACTA1	ACTA1	ACCGGGGTCAGAAAGATTCCTACGGTTTAAGAGCTATGCTGGAAACAGCATAGCAAGTTTAAATAAGGCTAGTCCGTTATCAACTTGAAAAAGTGGCACCGAGTCGGTGCTTTTTT
4|sgACTA1_3|ACTA1	GGTGAAAGCCGGCTTCGCCG	0	0	0	0	0	0	0	0	0	58	ACTA1	ACTA1	4|sg_hACTA1_03|ACTA1	ACTA1	ACCGGGTGAAAGCCGGCTTCGCCGGTTTAAGAGCTATGCTGGAAACAGCATAGCAAGTTTAAATAAGGCTAGTCCGTTATCAACTTGAAAAAGTGGCACCGAGTCGGTGCTTTTTT
4|sgACTA1_4|ACTA1	TCAGGTAGTCGGTGAGATCG	0	0	0	0	0	0	0	0	0	58	ACTA1	ACTA1	4|sg_hACTA1_04|ACTA1	ACTA1	ACCGTCAGGTAGTCGGTGAGATCGGTTTAAGAGCTATGCTGGAAACAGCATAGCAAGTTTAAATAAGGCTAGTCCGTTATCAACTTGAAAAAGTGGCACCGAGTCGGTGCTTTTTT
4|sgACTA2_1|ACTA2	CATGTATGTGGCTATCCAGG	0	0	0	0	0	0	0	0	0	59	ACTA2	ACTA2	4|sg_hACTA2_01|ACTA2	ACTA2	ACCGCATGTATGTGGCTATCCAGGGTTTAAGAGCTATGCTGGAAACAGCATAGCAAGTTTAAATAAGGCTAGTCCGTTATCAACTTGAAAAAGTGGCACCGAGTCGGTGCTTTTTT
4|sgACTA2_2|ACTA2	GAAGCTCATTGTAGAAAGAG	0	0	0	0	0	0	0	0	0	59	ACTA2	ACTA2	4|sg_hACTA2_02|ACTA2	ACTA2	ACCGGAAGCTCATTGTAGAAAGAGGTTTAAGAGCTATGCTGGAAACAGCATAGCAAGTTTAAATAAGGCTAGTCCGTTATCAACTTGAAAAAGTGGCACCGAGTCGGTGCTTTTTT
4|sgACTA2_3|ACTA2	GACGTCCCAGACATCAGGTG	4	0	51271	1	0	1	0	1	0	59	ACTA2	ACTA2	4|sg_hACTA2_03|ACTA2	ACTA2	ACCGGACGTCCCAGACATCAGGTGGTTTAAGAGCTATGCTGGAAACAGCATAGCAAGTTTAAATAAGGCTAGTCCGTTATCAACTTGAAAAAGTGGCACCGAGTCGGTGCTTTTTT
4|sgACTA2_4|ACTA2	GGCCTCACCAGTAGTAACGA	0	0	0	0	0	0	0	0	0	59	ACTA2	ACTA2	4|sg_hACTA2_04|ACTA2	ACTA2	ACCGGGCCTCACCAGTAGTAACGAGTTTAAGAGCTATGCTGGAAACAGCATAGCAAGTTTAAATAAGGCTAGTCCGTTATCAACTTGAAAAAGTGGCACCGAGTCGGTGCTTTTTT
4|sgACTB_1|ACTB	AAGAGCTACGAGCTGCCTGA	0	0	0	0	0	0	0	0	0	60	ACTB	ACTB	4|sg_hACTB_01|ACTB	ACTB	ACCGAAGAGCTACGAGCTGCCTGAGTTTAAGAGCTATGCTGGAAACAGCATAGCAAGTTTAAATAAGGCTAGTCCGTTATCAACTTGAAAAAGTGGCACCGAGTCGGTGCTTTTTT
4|sgACTB_2|ACTB	CGTACAGGGATAGCACAGCC	0	0	0	0	0	0	0	0	0	60	ACTB	ACTB	4|sg_hACTB_02|ACTB	ACTB	ACCGCGTACAGGGATAGCACAGCCGTTTAAGAGCTATGCTGGAAACAGCATAGCAAGTTTAAATAAGGCTAGTCCGTTATCAACTTGAAAAAGTGGCACCGAGTCGGTGCTTTTTT
4|sgACTB_3|ACTB	GGATTCCTATGTGGGCGACG	0	0	0	0	0	0	0	0	0	60	ACTB	ACTB	4|sg_hACTB_03|ACTB	ACTB	ACCGGGATTCCTATGTGGGCGACGGTTTAAGAGCTATGCTGGAAACAGCATAGCAAGTTTAAATAAGGCTAGTCCGTTATCAACTTGAAAAAGTGGCACCGAGTCGGTGCTTTTTT
4|sgACTB_4|ACTB	TCACCTGGGTCATCTTCTCG	0	0	0	0	0	0	0	0	0	60	ACTB	ACTB	4|sg_hACTB_04|ACTB	ACTB	ACCGTCACCTGGGTCATCTTCTCGGTTTAAGAGCTATGCTGGAAACAGCATAGCAAGTTTAAATAAGGCTAGTCCGTTATCAACTTGAAAAAGTGGCACCGAGTCGGTGCTTTTTT
4|sgACTBL2_1|ACTBL2	GAGGACGCCCTATCATGGAG	0	0	0	0	0	0	0	0	0	345651	ACTBL2	ACTBL2	4|sg_hACTBL2_01|ACTBL2	ACTBL2	ACCGGAGGACGCCCTATCATGGAGGTTTAAGAGCTATGCTGGAAACAGCATAGCAAGTTTAAATAAGGCTAGTCCGTTATCAACTTGAAAAAGTGGCACCGAGTCGGTGCTTTTTT
4|sgACTBL2_2|ACTBL2	GGAGCTATGAACTTCCTGAT	0	0	0	0	0	0	0	0	0	345651	ACTBL2	ACTBL2	4|sg_hACTBL2_02|ACTBL2	ACTBL2	ACCGGGAGCTATGAACTTCCTGATGTTTAAGAGCTATGCTGGAAACAGCATAGCAAGTTTAAATAAGGCTAGTCCGTTATCAACTTGAAAAAGTGGCACCGAGTCGGTGCTTTTTT
4|sgACTBL2_3|ACTBL2	GGAGCTCATTGTAGAATGTG	0	0	0	0	0	0	0	0	0	345651	ACTBL2	ACTBL2	4|sg_hACTBL2_03|ACTBL2	ACTBL2	ACCGGGAGCTCATTGTAGAATGTGGTTTAAGAGCTATGCTGGAAACAGCATAGCAAGTTTAAATAAGGCTAGTCCGTTATCAACTTGAAAAAGTGGCACCGAGTCGGTGCTTTTTT
4|sgACTBL2_4|ACTBL2	TGTCCCTCTATGCCTCAGGA	0	0	0	0	0	0	0	0	0	345651	ACTBL2	ACTBL2	4|sg_hACTBL2_04|ACTBL2	ACTBL2	ACCGTGTCCCTCTATGCCTCAGGAGTTTAAGAGCTATGCTGGAAACAGCATAGCAAGTTTAAATAAGGCTAGTCCGTTATCAACTTGAAAAAGTGGCACCGAGTCGGTGCTTTTTT
4|sgACTC1_1|ACTC1	CGATGGACGGGAAGACAGCG	0	0	0	0	0	0	0	0	0	70	ACTC1	ACTC1	4|sg_hACTC1_01|ACTC1	ACTC1	ACCGCGATGGACGGGAAGACAGCGGTTTAAGAGCTATGCTGGAAACAGCATAGCAAGTTTAAATAAGGCTAGTCCGTTATCAACTTGAAAAAGTGGCACCGAGTCGGTGCTTTTTT
4|sgACTC1_2|ACTC1	CTGGGCTTCATCACCTACGT	0	0	1	0	0	0	0	0	0	70	ACTC1	ACTC1	4|sg_hACTC1_02|ACTC1	ACTC1	ACCGCTGGGCTTCATCACCTACGTGTTTAAGAGCTATGCTGGAAACAGCATAGCAAGTTTAAATAAGGCTAGTCCGTTATCAACTTGAAAAAGTGGCACCGAGTCGGTGCTTTTTT
4|sgACTC1_3|ACTC1	GGTACGGCCAGAAGCATACA	0	0	0	0	0	0	0	0	0	70	ACTC1	ACTC1	4|sg_hACTC1_03|ACTC1	ACTC1	ACCGGGTACGGCCAGAAGCATACAGTTTAAGAGCTATGCTGGAAACAGCATAGCAAGTTTAAATAAGGCTAGTCCGTTATCAACTTGAAAAAGTGGCACCGAGTCGGTGCTTTTTT
4|sgACTC1_4|ACTC1	TCTTCATGAGGTAGTCAGTG	0	0	0	0	0	0	0	0	0	70	ACTC1	ACTC1	4|sg_hACTC1_04|ACTC1	ACTC1	ACCGTCTTCATGAGGTAGTCAGTGGTTTAAGAGCTATGCTGGAAACAGCATAGCAAGTTTAAATAAGGCTAGTCCGTTATCAACTTGAAAAAGTGGCACCGAGTCGGTGCTTTTTT
4|sgACTG1_1|ACTG1	AGCTGTAGCCTCGCTCAGTG	0	0	0	0	0	0	0	0	0	71	ACTG1	ACTG1	4|sg_hACTG1_01|ACTG1	ACTG1	ACCGAGCTGTAGCCTCGCTCAGTGGTTTAAGAGCTATGCTGGAAACAGCATAGCAAGTTTAAATAAGGCTAGTCCGTTATCAACTTGAAAAAGTGGCACCGAGTCGGTGCTTTTTT
4|sgACTG1_2|ACTG1	ATGGAAGGAAACACGGCTCG	3	0	0	0	0	3	0	31493	0	71	ACTG1	ACTG1	4|sg_hACTG1_02|ACTG1	ACTG1	ACCGATGGAAGGAAACACGGCTCGGTTTAAGAGCTATGCTGGAAACAGCATAGCAAGTTTAAATAAGGCTAGTCCGTTATCAACTTGAAAAAGTGGCACCGAGTCGGTGCTTTTTT
4|sgACTG1_3|ACTG1	CAACAGAGAGAAGATGACTC	0	0	0	0	0	0	0	0	0	71	ACTG1	ACTG1	4|sg_hACTG1_03|ACTG1	ACTG1	ACCGCAACAGAGAGAAGATGACTCGTTTAAGAGCTATGCTGGAAACAGCATAGCAAGTTTAAATAAGGCTAGTCCGTTATCAACTTGAAAAAGTGGCACCGAGTCGGTGCTTTTTT
4|sgACTG1_4|ACTG1	CTTCTACAACGAGCTGCGCG	0	0	0	0	0	0	0	0	0	71	ACTG1	ACTG1	4|sg_hACTG1_04|ACTG1	ACTG1	ACCGCTTCTACAACGAGCTGCGCGGTTTAAGAGCTATGCTGGAAACAGCATAGCAAGTTTAAATAAGGCTAGTCCGTTATCAACTTGAAAAAGTGGCACCGAGTCGGTGCTTTTTT
4|sgACTG2_1|ACTG2	AGAGCTATGAGCTGCCAGAT	0	0	0	0	0	0	0	0	0	72	ACTG2	ACTG2	4|sg_hACTG2_01|ACTG2	ACTG2	ACCGAGAGCTATGAGCTGCCAGATGTTTAAGAGCTATGCTGGAAACAGCATAGCAAGTTTAAATAAGGCTAGTCCGTTATCAACTTGAAAAAGTGGCACCGAGTCGGTGCTTTTTT
4|sgACTG2_2|ACTG2	CTGGATACCTGTGGTCACAA	0	0	0	0	0	0	0	0	0	72	ACTG2	ACTG2	4|sg_hACTG2_02|ACTG2	ACTG2	ACCGCTGGATACCTGTGGTCACAAGTTTAAGAGCTATGCTGGAAACAGCATAGCAAGTTTAAATAAGGCTAGTCCGTTATCAACTTGAAAAAGTGGCACCGAGTCGGTGCTTTTTT
4|sgACTG2_3|ACTG2	TGAATCCAGGACGATGCCTG	0	0	0	0	0	0	0	0	0	72	ACTG2	ACTG2	4|sg_hACTG2_03|ACTG2	ACTG2	ACCGTGAATCCAGGACGATGCCTGGTTTAAGAGCTATGCTGGAAACAGCATAGCAAGTTTAAATAAGGCTAGTCCGTTATCAACTTGAAAAAGTGGCACCGAGTCGGTGCTTTTTT
4|sgACTG2_4|ACTG2	TGATGATGCCGTGTTCAATG	0	0	14879	0	0	0	0	0	1	72	ACTG2	ACTG2	4|sg_hACTG2_04|ACTG2	ACTG2	ACCGTGATGATGCCGTGTTCAATGGTTTAAGAGCTATGCTGGAAACAGCATAGCAAGTTTAAATAAGGCTAGTCCGTTATCAACTTGAAAAAGTGGCACCGAGTCGGTGCTTTTTT
4|sgACTL10_1|ACTL10	AGAAGATGCCCAAAACGCTG	0	0	0	0	0	0	0	0	0	170487	ACTL10	ACTL10	4|sg_hACTL10_01|ACTL10	ACTL10	ACCGAGAAGATGCCCAAAACGCTGGTTTAAGAGCTATGCTGGAAACAGCATAGCAAGTTTAAATAAGGCTAGTCCGTTATCAACTTGAAAAAGTGGCACCGAGTCGGTGCTTTTTT
4|sgACTL10_2|ACTL10	AGATGTGTGATGGCCTTGCG	0	0	0	0	0	0	0	0	0	170487	ACTL10	ACTL10	4|sg_hACTL10_02|ACTL10	ACTL10	ACCGAGATGTGTGATGGCCTTGCGGTTTAAGAGCTATGCTGGAAACAGCATAGCAAGTTTAAATAAGGCTAGTCCGTTATCAACTTGAAAAAGTGGCACCGAGTCGGTGCTTTTTT
4|sgACTL10_3|ACTL10	CACGCCACGCCCATCTACGC	0	0	0	0	0	0	0	0	0	170487	ACTL10	ACTL10	4|sg_hACTL10_03|ACTL10	ACTL10	ACCGCACGCCACGCCCATCTACGCGTTTAAGAGCTATGCTGGAAACAGCATAGCAAGTTTAAATAAGGCTAGTCCGTTATCAACTTGAAAAAGTGGCACCGAGTCGGTGCTTTTTT
4|sgACTL10_4|ACTL10	GGCCACCTTCCGACTGAACG	0	0	1	1	24167	1	2	0	0	170487	ACTL10	ACTL10	4|sg_hACTL10_04|ACTL10	ACTL10	ACCGGGCCACCTTCCGACTGAACGGTTTAAGAGCTATGCTGGAAACAGCATAGCAAGTTTAAATAAGGCTAGTCCGTTATCAACTTGAAAAAGTGGCACCGAGTCGGTGCTTTTTT
4|sgACTL6A_1|ACTL6A	ACCACCATACCAATAGCTGT	0	0	0	0	0	0	0	0	0	86	ACTL6A	ACTL6A	4|sg_hACTL6A_01|ACTL6A	ACTL6A	ACCGACCACCATACCAATAGCTGTGTTTAAGAGCTATGCTGGAAACAGCATAGCAAGTTTAAATAAGGCTAGTCCGTTATCAACTTGAAAAAGTGGCACCGAGTCGGTGCTTTTTT
4|sgACTL6A_2|ACTL6A	ACTGCAATTCCAGTCCACGA	0	0	0	0	0	0	0	0	0	86	ACTL6A	ACTL6A	4|sg_hACTL6A_02|ACTL6A	ACTL6A	ACCGACTGCAATTCCAGTCCACGAGTTTAAGAGCTATGCTGGAAACAGCATAGCAAGTTTAAATAAGGCTAGTCCGTTATCAACTTGAAAAAGTGGCACCGAGTCGGTGCTTTTTT
4|sgACTL6A_3|ACTL6A	AGAAGTTGCCTCAGGTTACG	0	0	0	0	0	0	0	0	0	86	ACTL6A	ACTL6A	4|sg_hACTL6A_03|ACTL6A	ACTL6A	ACCGAGAAGTTGCCTCAGGTTACGGTTTAAGAGCTATGCTGGAAACAGCATAGCAAGTTTAAATAAGGCTAGTCCGTTATCAACTTGAAAAAGTGGCACCGAGTCGGTGCTTTTTT
4|sgACTL6A_4|ACTL6A	TGTTCCGAGGGAGAATATGG	0	0	0	0	0	0	0	0	0	86	ACTL6A	ACTL6A	4|sg_hACTL6A_04|ACTL6A	ACTL6A	ACCGTGTTCCGAGGGAGAATATGGGTTTAAGAGCTATGCTGGAAACAGCATAGCAAGTTTAAATAAGGCTAGTCCGTTATCAACTTGAAAAAGTGGCACCGAGTCGGTGCTTTTTT
4|sgACTL6B_1|ACTL6B	AGTGGAACACACGGGCCAAG	0	0	0	0	0	0	0	0	0	51412	ACTL6B	ACTL6B	4|sg_hACTL6B_01|ACTL6B	ACTL6B	ACCGAGTGGAACACACGGGCCAAGGTTTAAGAGCTATGCTGGAAACAGCATAGCAAGTTTAAATAAGGCTAGTCCGTTATCAACTTGAAAAAGTGGCACCGAGTCGGTGCTTTTTT
4|sgACTL6B_2|ACTL6B	ATGCCAGCTTTGCAAACGGG	0	0	0	0	0	0	0	0	0	51412	ACTL6B	ACTL6B	4|sg_hACTL6B_02|ACTL6B	ACTL6B	ACCGATGCCAGCTTTGCAAACGGGGTTTAAGAGCTATGCTGGAAACAGCATAGCAAGTTTAAATAAGGCTAGTCCGTTATCAACTTGAAAAAGTGGCACCGAGTCGGTGCTTTTTT
4|sgACTL6B_3|ACTL6B	CACTCACTGTTCATCGTAGG	0	0	0	0	0	0	0	0	0	51412	ACTL6B	ACTL6B	4|sg_hACTL6B_03|ACTL6B	ACTL6B	ACCGCACTCACTGTTCATCGTAGGGTTTAAGAGCTATGCTGGAAACAGCATAGCAAGTTTAAATAAGGCTAGTCCGTTATCAACTTGAAAAAGTGGCACCGAGTCGGTGCTTTTTT
4|sgACTL6B_4|ACTL6B	TTGGCTGCGATCATGTAAGG	0	0	0	0	0	0	0	0	0	51412	ACTL6B	ACTL6B	4|sg_hACTL6B_04|ACTL6B	ACTL6B	ACCGTTGGCTGCGATCATGTAAGGGTTTAAGAGCTATGCTGGAAACAGCATAGCAAGTTTAAATAAGGCTAGTCCGTTATCAACTTGAAAAAGTGGCACCGAGTCGGTGCTTTTTT
4|sgACTL7A_1|ACTL7A	ATCGCAAGGAGACATTCGTG	0	0	0	0	0	0	0	0	0	10881	ACTL7A	ACTL7A	4|sg_hACTL7A_01|ACTL7A	ACTL7A	ACCGATCGCAAGGAGACATTCGTGGTTTAAGAGCTATGCTGGAAACAGCATAGCAAGTTTAAATAAGGCTAGTCCGTTATCAACTTGAAAAAGTGGCACCGAGTCGGTGCTTTTTT
4|sgACTL7A_2|ACTL7A	GGGCCATGGCGTGTCCTACG	0	0	0	0	0	0	0	0	0	10881	ACTL7A	ACTL7A	4|sg_hACTL7A_02|ACTL7A	ACTL7A	ACCGGGGCCATGGCGTGTCCTACGGTTTAAGAGCTATGCTGGAAACAGCATAGCAAGTTTAAATAAGGCTAGTCCGTTATCAACTTGAAAAAGTGGCACCGAGTCGGTGCTTTTTT
4|sgACTL7A_3|ACTL7A	GTGGCTCTGAACTCGTATGG	0	0	0	1	0	0	0	0	0	10881	ACTL7A	ACTL7A	4|sg_hACTL7A_03|ACTL7A	ACTL7A	ACCGGTGGCTCTGAACTCGTATGGGTTTAAGAGCTATGCTGGAAACAGCATAGCAAGTTTAAATAAGGCTAGTCCGTTATCAACTTGAAAAAGTGGCACCGAGTCGGTGCTTTTTT
4|sgACTL7A_4|ACTL7A	GTTGTTGAGATCTTGTGGGT	0	0	0	0	0	0	0	0	0	10881	ACTL7A	ACTL7A	4|sg_hACTL7A_04|ACTL7A	ACTL7A	ACCGGTTGTTGAGATCTTGTGGGTGTTTAAGAGCTATGCTGGAAACAGCATAGCAAGTTTAAATAAGGCTAGTCCGTTATCAACTTGAAAAAGTGGCACCGAGTCGGTGCTTTTTT
4|sgACTL7B_1|ACTL7B	ACTCCTACGGCAAGACCTCG	0	0	0	0	0	0	0	0	0	10880	ACTL7B	ACTL7B	4|sg_hACTL7B_01|ACTL7B	ACTL7B	ACCGACTCCTACGGCAAGACCTCGGTTTAAGAGCTATGCTGGAAACAGCATAGCAAGTTTAAATAAGGCTAGTCCGTTATCAACTTGAAAAAGTGGCACCGAGTCGGTGCTTTTTT
4|sgACTL7B_2|ACTL7B	AGCCGCGCCGACTACGCTGG	0	0	0	0	0	0	0	0	0	10880	ACTL7B	ACTL7B	4|sg_hACTL7B_02|ACTL7B	ACTL7B	ACCGAGCCGCGCCGACTACGCTGGGTTTAAGAGCTATGCTGGAAACAGCATAGCAAGTTTAAATAAGGCTAGTCCGTTATCAACTTGAAAAAGTGGCACCGAGTCGGTGCTTTTTT
4|sgACTL7B_3|ACTL7B	CAAGAAGAAGTGCTGCTATG	0	0	0	0	0	0	0	0	0	10880	ACTL7B	ACTL7B	4|sg_hACTL7B_03|ACTL7B	ACTL7B	ACCGCAAGAAGAAGTGCTGCTATGGTTTAAGAGCTATGCTGGAAACAGCATAGCAAGTTTAAATAAGGCTAGTCCGTTATCAACTTGAAAAAGTGGCACCGAGTCGGTGCTTTTTT
4|sgACTL7B_4|ACTL7B	CGTGGGCAAACGCTGCCCCG	1	0	0	0	0	0	0	7976	0	10880	ACTL7B	ACTL7B	4|sg_hACTL7B_04|ACTL7B	ACTL7B	ACCGCGTGGGCAAACGCTGCCCCGGTTTAAGAGCTATGCTGGAAACAGCATAGCAAGTTTAAATAAGGCTAGTCCGTTATCAACTTGAAAAAGTGGCACCGAGTCGGTGCTTTTTT
4|sgACTL8_1|ACTL8	CTGGTGGAAAGGCTGCACGC	0	0	0	0	0	0	0	0	0	81569	ACTL8	ACTL8	4|sg_hACTL8_01|ACTL8	ACTL8	ACCGCTGGTGGAAAGGCTGCACGCGTTTAAGAGCTATGCTGGAAACAGCATAGCAAGTTTAAATAAGGCTAGTCCGTTATCAACTTGAAAAAGTGGCACCGAGTCGGTGCTTTTTT
4|sgACTL8_2|ACTL8	GAGACTCTTGAGGAGATAGG	0	0	0	0	0	0	0	0	0	81569	ACTL8	ACTL8	4|sg_hACTL8_02|ACTL8	ACTL8	ACCGGAGACTCTTGAGGAGATAGGGTTTAAGAGCTATGCTGGAAACAGCATAGCAAGTTTAAATAAGGCTAGTCCGTTATCAACTTGAAAAAGTGGCACCGAGTCGGTGCTTTTTT
4|sgACTL8_3|ACTL8	TGTCTCCGTGATGATCACAG	0	0	0	0	0	0	0	0	0	81569	ACTL8	ACTL8	4|sg_hACTL8_03|ACTL8	ACTL8	ACCGTGTCTCCGTGATGATCACAGGTTTAAGAGCTATGCTGGAAACAGCATAGCAAGTTTAAATAAGGCTAGTCCGTTATCAACTTGAAAAAGTGGCACCGAGTCGGTGCTTTTTT
4|sgACTL8_4|ACTL8	TTTAGCTACCCCATCGAGCG	0	0	0	0	0	0	0	0	0	81569	ACTL8	ACTL8	4|sg_hACTL8_04|ACTL8	ACTL8	ACCGTTTAGCTACCCCATCGAGCGGTTTAAGAGCTATGCTGGAAACAGCATAGCAAGTTTAAATAAGGCTAGTCCGTTATCAACTTGAAAAAGTGGCACCGAGTCGGTGCTTTTTT
4|sgACTL9_1|ACTL9	CAGCCCGCTGACACGACCGT	4	1	1	0	77181	2	2	0	0	284382	ACTL9	ACTL9	4|sg_hACTL9_01|ACTL9	ACTL9	ACCGCAGCCCGCTGACACGACCGTGTTTAAGAGCTATGCTGGAAACAGCATAGCAAGTTTAAATAAGGCTAGTCCGTTATCAACTTGAAAAAGTGGCACCGAGTCGGTGCTTTTTT
4|sgACTL9_2|ACTL9	CCCAAACCCCAGTCCCAACG	0	0	0	0	0	0	0	0	0	284382	ACTL9	ACTL9	4|sg_hACTL9_02|ACTL9	ACTL9	ACCGCCCAAACCCCAGTCCCAACGGTTTAAGAGCTATGCTGGAAACAGCATAGCAAGTTTAAATAAGGCTAGTCCGTTATCAACTTGAAAAAGTGGCACCGAGTCGGTGCTTTTTT
4|sgACTL9_3|ACTL9	GCTGCCACCAAAGACCGGCG	0	0	0	0	0	0	0	0	0	284382	ACTL9	ACTL9	4|sg_hACTL9_03|ACTL9	ACTL9	ACCGGCTGCCACCAAAGACCGGCGGTTTAAGAGCTATGCTGGAAACAGCATAGCAAGTTTAAATAAGGCTAGTCCGTTATCAACTTGAAAAAGTGGCACCGAGTCGGTGCTTTTTT
4|sgACTL9_4|ACTL9	TAAGCACCACTATTGCTACG	0	0	0	0	0	0	0	0	0	284382	ACTL9	ACTL9	4|sg_hACTL9_04|ACTL9	ACTL9	ACCGTAAGCACCACTATTGCTACGGTTTAAGAGCTATGCTGGAAACAGCATAGCAAGTTTAAATAAGGCTAGTCCGTTATCAACTTGAAAAAGTGGCACCGAGTCGGTGCTTTTTT
4|sgACTN1_1|ACTN1	CAGGACATCAACAATGCCTG	0	0	0	0	0	0	0	0	0	87	ACTN1	ACTN1	4|sg_hACTN1_01|ACTN1	ACTN1	ACCGCAGGACATCAACAATGCCTGGTTTAAGAGCTATGCTGGAAACAGCATAGCAAGTTTAAATAAGGCTAGTCCGTTATCAACTTGAAAAAGTGGCACCGAGTCGGTGCTTTTTT
4|sgACTN1_2|ACTN1	GCAGGGCCTTGATCTCCGAG	0	0	0	0	0	0	0	0	0	87	ACTN1	ACTN1	4|sg_hACTN1_02|ACTN1	ACTN1	ACCGGCAGGGCCTTGATCTCCGAGGTTTAAGAGCTATGCTGGAAACAGCATAGCAAGTTTAAATAAGGCTAGTCCGTTATCAACTTGAAAAAGTGGCACCGAGTCGGTGCTTTTTT
4|sgACTN1_3|ACTN1	GGATCCGCCGCACAATCCCG	0	0	0	0	0	0	0	0	0	87	ACTN1	ACTN1	4|sg_hACTN1_03|ACTN1	ACTN1	ACCGGGATCCGCCGCACAATCCCGGTTTAAGAGCTATGCTGGAAACAGCATAGCAAGTTTAAATAAGGCTAGTCCGTTATCAACTTGAAAAAGTGGCACCGAGTCGGTGCTTTTTT
4|sgACTN1_4|ACTN1	GGCCCTAACTCAGAAGCGAA	0	0	0	0	0	0	0	0	0	87	ACTN1	ACTN1	4|sg_hACTN1_04|ACTN1	ACTN1	ACCGGGCCCTAACTCAGAAGCGAAGTTTAAGAGCTATGCTGGAAACAGCATAGCAAGTTTAAATAAGGCTAGTCCGTTATCAACTTGAAAAAGTGGCACCGAGTCGGTGCTTTTTT
4|sgACTN2_1|ACTN2	AGGACTTCCGGGATTACCGC	0	0	0	0	0	0	0	0	0	88	ACTN2	ACTN2	4|sg_hACTN2_01|ACTN2	ACTN2	ACCGAGGACTTCCGGGATTACCGCGTTTAAGAGCTATGCTGGAAACAGCATAGCAAGTTTAAATAAGGCTAGTCCGTTATCAACTTGAAAAAGTGGCACCGAGTCGGTGCTTTTTT
4|sgACTN2_2|ACTN2	CCAGGTTAATATTTCCTATG	39501	0	0	1	1	1	0	3	0	88	ACTN2	ACTN2	4|sg_hACTN2_02|ACTN2	ACTN2	ACCGCCAGGTTAATATTTCCTATGGTTTAAGAGCTATGCTGGAAACAGCATAGCAAGTTTAAATAAGGCTAGTCCGTTATCAACTTGAAAAAGTGGCACCGAGTCGGTGCTTTTTT
4|sgACTN2_3|ACTN2	CGAGTCGGCGTCGCTGACAG	0	2	3955	1	0	3	1	22137	0	88	ACTN2	ACTN2	4|sg_hACTN2_03|ACTN2	ACTN2	ACCGCGAGTCGGCGTCGCTGACAGGTTTAAGAGCTATGCTGGAAACAGCATAGCAAGTTTAAATAAGGCTAGTCCGTTATCAACTTGAAAAAGTGGCACCGAGTCGGTGCTTTTTT
4|sgACTN2_4|ACTN2	TGATGGTCCAGATCATACCC	0	0	0	0	0	0	0	0	0	88	ACTN2	ACTN2	4|sg_hACTN2_04|ACTN2	ACTN2	ACCGTGATGGTCCAGATCATACCCGTTTAAGAGCTATGCTGGAAACAGCATAGCAAGTTTAAATAAGGCTAGTCCGTTATCAACTTGAAAAAGTGGCACCGAGTCGGTGCTTTTTT
4|sgACTN3_1|ACTN3	CAGTGAGCTGGACTACCACG	0	0	0	0	0	0	0	0	0	89	ACTN3	ACTN3	4|sg_hACTN3_01|ACTN3	ACTN3	ACCGCAGTGAGCTGGACTACCACGGTTTAAGAGCTATGCTGGAAACAGCATAGCAAGTTTAAATAAGGCTAGTCCGTTATCAACTTGAAAAAGTGGCACCGAGTCGGTGCTTTTTT
4|sgACTN3_2|ACTN3	CCATGGCTGGAGAACCGTGT	0	0	31969	0	0	1	0	2	2	89	ACTN3	ACTN3	4|sg_hACTN3_02|ACTN3	ACTN3	ACCGCCATGGCTGGAGAACCGTGTGTTTAAGAGCTATGCTGGAAACAGCATAGCAAGTTTAAATAAGGCTAGTCCGTTATCAACTTGAAAAAGTGGCACCGAGTCGGTGCTTTTTT
4|sgACTN3_3|ACTN3	GTCCAGGGCCTTGTTAACGT	0	0	0	0	0	0	0	0	0	89	ACTN3	ACTN3	4|sg_hACTN3_03|ACTN3	ACTN3	ACCGGTCCAGGGCCTTGTTAACGTGTTTAAGAGCTATGCTGGAAACAGCATAGCAAGTTTAAATAAGGCTAGTCCGTTATCAACTTGAAAAAGTGGCACCGAGTCGGTGCTTTTTT
4|sgACTN3_4|ACTN3	TGCAACTGGAGTTTGCCCGG	0	0	0	0	0	0	0	0	0	89	ACTN3	ACTN3	4|sg_hACTN3_04|ACTN3	ACTN3	ACCGTGCAACTGGAGTTTGCCCGGGTTTAAGAGCTATGCTGGAAACAGCATAGCAAGTTTAAATAAGGCTAGTCCGTTATCAACTTGAAAAAGTGGCACCGAGTCGGTGCTTTTTT
4|sgACTN4_1|ACTN4	ACAGATCGAGAACATTGATG	0	0	0	0	0	0	0	0	0	81	ACTN4	ACTN4	4|sg_hACTN4_01|ACTN4	ACTN4	ACCGACAGATCGAGAACATTGATGGTTTAAGAGCTATGCTGGAAACAGCATAGCAAGTTTAAATAAGGCTAGTCCGTTATCAACTTGAAAAAGTGGCACCGAGTCGGTGCTTTTTT
4|sgACTN4_2|ACTN4	ACTCCCACAATGTCAACACC	0	0	0	0	0	0	0	0	0	81	ACTN4	ACTN4	4|sg_hACTN4_02|ACTN4	ACTN4	ACCGACTCCCACAATGTCAACACCGTTTAAGAGCTATGCTGGAAACAGCATAGCAAGTTTAAATAAGGCTAGTCCGTTATCAACTTGAAAAAGTGGCACCGAGTCGGTGCTTTTTT
4|sgACTN4_3|ACTN4	GTTCATCGTCCATACCATCG	3	7	4	4	2	241614	3	5224	3	81	ACTN4	ACTN4	4|sg_hACTN4_03|ACTN4	ACTN4	ACCGGTTCATCGTCCATACCATCGGTTTAAGAGCTATGCTGGAAACAGCATAGCAAGTTTAAATAAGGCTAGTCCGTTATCAACTTGAAAAAGTGGCACCGAGTCGGTGCTTTTTT
4|sgACTN4_4|ACTN4	TGGGCGGCTTGTGCACACGC	0	0	0	0	0	0	0	0	0	81	ACTN4	ACTN4	4|sg_hACTN4_04|ACTN4	ACTN4	ACCGTGGGCGGCTTGTGCACACGCGTTTAAGAGCTATGCTGGAAACAGCATAGCAAGTTTAAATAAGGCTAGTCCGTTATCAACTTGAAAAAGTGGCACCGAGTCGGTGCTTTTTT
4|sgACTR10_1|ACTR10	AAAAAGATATGGGTAACACC	0	0	0	0	0	0	0	0	0	55860	ACTR10	ACTR10	4|sg_hACTR10_01|ACTR10	ACTR10	ACCGAAAAAGATATGGGTAACACCGTTTAAGAGCTATGCTGGAAACAGCATAGCAAGTTTAAATAAGGCTAGTCCGTTATCAACTTGAAAAAGTGGCACCGAGTCGGTGCTTTTTT
4|sgACTR10_2|ACTR10	AATGAATTTACCCATCACTG	0	0	0	0	0	0	0	0	0	55860	ACTR10	ACTR10	4|sg_hACTR10_02|ACTR10	ACTR10	ACCGAATGAATTTACCCATCACTGGTTTAAGAGCTATGCTGGAAACAGCATAGCAAGTTTAAATAAGGCTAGTCCGTTATCAACTTGAAAAAGTGGCACCGAGTCGGTGCTTTTTT
4|sgACTR10_3|ACTR10	AATGGATAGTCAACATTTGG	0	0	0	0	0	0	0	0	0	55860	ACTR10	ACTR10	4|sg_hACTR10_03|ACTR10	ACTR10	ACCGAATGGATAGTCAACATTTGGGTTTAAGAGCTATGCTGGAAACAGCATAGCAAGTTTAAATAAGGCTAGTCCGTTATCAACTTGAAAAAGTGGCACCGAGTCGGTGCTTTTTT
4|sgACTR10_4|ACTR10	ATTCGATAATCACAACTCGG	0	0	0	0	0	0	0	0	0	55860	ACTR10	ACTR10	4|sg_hACTR10_04|ACTR10	ACTR10	ACCGATTCGATAATCACAACTCGGGTTTAAGAGCTATGCTGGAAACAGCATAGCAAGTTTAAATAAGGCTAGTCCGTTATCAACTTGAAAAAGTGGCACCGAGTCGGTGCTTTTTT
4|sgACTR1A_1|ACTR1A	AGTCGTAGCCCTCCTTACGC	0	0	7449	0	0	0	0	1	1	10121	ACTR1A	ACTR1A	4|sg_hACTR1A_01|ACTR1A	ACTR1A	ACCGAGTCGTAGCCCTCCTTACGCGTTTAAGAGCTATGCTGGAAACAGCATAGCAAGTTTAAATAAGGCTAGTCCGTTATCAACTTGAAAAAGTGGCACCGAGTCGGTGCTTTTTT
4|sgACTR1A_2|ACTR1A	CGCTACAGGCAGGACCACAG	0	0	0	0	0	0	0	0	0	10121	ACTR1A	ACTR1A	4|sg_hACTR1A_02|ACTR1A	ACTR1A	ACCGCGCTACAGGCAGGACCACAGGTTTAAGAGCTATGCTGGAAACAGCATAGCAAGTTTAAATAAGGCTAGTCCGTTATCAACTTGAAAAAGTGGCACCGAGTCGGTGCTTTTTT
4|sgACTR1A_3|ACTR1A	TGACACGAACGTGCTTGGGT	0	0	0	0	0	0	0	0	0	10121	ACTR1A	ACTR1A	4|sg_hACTR1A_03|ACTR1A	ACTR1A	ACCGTGACACGAACGTGCTTGGGTGTTTAAGAGCTATGCTGGAAACAGCATAGCAAGTTTAAATAAGGCTAGTCCGTTATCAACTTGAAAAAGTGGCACCGAGTCGGTGCTTTTTT
4|sgACTR1A_4|ACTR1A	GGATCCGGTGTGATTAAAGC	0	0	0	0	0	0	0	0	0	10121	ACTR1A	ACTR1A	4|sg_hACTR1A_04|ACTR1A	ACTR1A	ACCGGGATCCGGTGTGATTAAAGCGTTTAAGAGCTATGCTGGAAACAGCATAGCAAGTTTAAATAAGGCTAGTCCGTTATCAACTTGAAAAAGTGGCACCGAGTCGGTGCTTTTTT
4|sgACTR1B_1|ACTR1B	CTTCATCGGACCAAAAGCAG	0	0	0	0	0	0	0	0	0	10120	ACTR1B	ACTR1B	4|sg_hACTR1B_01|ACTR1B	ACTR1B	ACCGCTTCATCGGACCAAAAGCAGGTTTAAGAGCTATGCTGGAAACAGCATAGCAAGTTTAAATAAGGCTAGTCCGTTATCAACTTGAAAAAGTGGCACCGAGTCGGTGCTTTTTT
4|sgACTR1B_2|ACTR1B	GCATCCTGTGCTCCTCACGG	0	0	0	0	0	0	0	0	0	10120	ACTR1B	ACTR1B	4|sg_hACTR1B_02|ACTR1B	ACTR1B	ACCGGCATCCTGTGCTCCTCACGGGTTTAAGAGCTATGCTGGAAACAGCATAGCAAGTTTAAATAAGGCTAGTCCGTTATCAACTTGAAAAAGTGGCACCGAGTCGGTGCTTTTTT
4|sgACTR1B_3|ACTR1B	GGTTGTCCGGACAATCAAAG	0	0	0	0	0	0	0	0	0	10120	ACTR1B	ACTR1B	4|sg_hACTR1B_03|ACTR1B	ACTR1B	ACCGGGTTGTCCGGACAATCAAAGGTTTAAGAGCTATGCTGGAAACAGCATAGCAAGTTTAAATAAGGCTAGTCCGTTATCAACTTGAAAAAGTGGCACCGAGTCGGTGCTTTTTT
4|sgACTR1B_4|ACTR1B	TCCGTCCTAACAGTGTCGGG	0	0	0	0	0	0	0	0	4	10120	ACTR1B	ACTR1B	4|sg_hACTR1B_04|ACTR1B	ACTR1B	ACCGTCCGTCCTAACAGTGTCGGGGTTTAAGAGCTATGCTGGAAACAGCATAGCAAGTTTAAATAAGGCTAGTCCGTTATCAACTTGAAAAAGTGGCACCGAGTCGGTGCTTTTTT
4|sgACTR2_1|ACTR2	ACTGGTGTAGTGGTAGACTC	0	0	0	0	0	0	0	0	0	10097	ACTR2	ACTR2	4|sg_hACTR2_01|ACTR2	ACTR2	ACCGACTGGTGTAGTGGTAGACTCGTTTAAGAGCTATGCTGGAAACAGCATAGCAAGTTTAAATAAGGCTAGTCCGTTATCAACTTGAAAAAGTGGCACCGAGTCGGTGCTTTTTT
4|sgACTR2_2|ACTR2	ATCCTCGCAACAGAAGTAGC	0	0	0	0	0	0	0	0	0	10097	ACTR2	ACTR2	4|sg_hACTR2_02|ACTR2	ACTR2	ACCGATCCTCGCAACAGAAGTAGCGTTTAAGAGCTATGCTGGAAACAGCATAGCAAGTTTAAATAAGGCTAGTCCGTTATCAACTTGAAAAAGTGGCACCGAGTCGGTGCTTTTTT
4|sgACTR2_3|ACTR2	GGACGTATCATCAAAGTTGG	1	27877	0	0	0	0	1	0	4	10097	ACTR2	ACTR2	4|sg_hACTR2_03|ACTR2	ACTR2	ACCGGGACGTATCATCAAAGTTGGGTTTAAGAGCTATGCTGGAAACAGCATAGCAAGTTTAAATAAGGCTAGTCCGTTATCAACTTGAAAAAGTGGCACCGAGTCGGTGCTTTTTT
4|sgACTR2_4|ACTR2	GGATGACATGAAACACCTGT	0	0	0	0	0	0	0	0	0	10097	ACTR2	ACTR2	4|sg_hACTR2_04|ACTR2	ACTR2	ACCGGGATGACATGAAACACCTGTGTTTAAGAGCTATGCTGGAAACAGCATAGCAAGTTTAAATAAGGCTAGTCCGTTATCAACTTGAAAAAGTGGCACCGAGTCGGTGCTTTTTT
4|sgACTR3_1|ACTR3	ACCGGTACGGTAATAGACAG	0	0	0	0	0	0	0	0	0	10096	ACTR3	ACTR3	4|sg_hACTR3_01|ACTR3	ACTR3	ACCGACCGGTACGGTAATAGACAGGTTTAAGAGCTATGCTGGAAACAGCATAGCAAGTTTAAATAAGGCTAGTCCGTTATCAACTTGAAAAAGTGGCACCGAGTCGGTGCTTTTTT
4|sgACTR3_2|ACTR3	ATTAAGGAGTCAGCAAAAGT	0	0	0	0	0	0	0	0	1	10096	ACTR3	ACTR3	4|sg_hACTR3_02|ACTR3	ACTR3	ACCGATTAAGGAGTCAGCAAAAGTGTTTAAGAGCTATGCTGGAAACAGCATAGCAAGTTTAAATAAGGCTAGTCCGTTATCAACTTGAAAAAGTGGCACCGAGTCGGTGCTTTTTT
4|sgACTR3_3|ACTR3	CCCAATCTTCAACTATACCA	0	0	0	0	0	0	0	0	0	10096	ACTR3	ACTR3	4|sg_hACTR3_03|ACTR3	ACTR3	ACCGCCCAATCTTCAACTATACCAGTTTAAGAGCTATGCTGGAAACAGCATAGCAAGTTTAAATAAGGCTAGTCCGTTATCAACTTGAAAAAGTGGCACCGAGTCGGTGCTTTTTT
4|sgACTR3_4|ACTR3	TTAACAAGTATGATACAGAT	109231	1	1	2	3	0	2	12	3	10096	ACTR3	ACTR3	4|sg_hACTR3_04|ACTR3	ACTR3	ACCGTTAACAAGTATGATACAGATGTTTAAGAGCTATGCTGGAAACAGCATAGCAAGTTTAAATAAGGCTAGTCCGTTATCAACTTGAAAAAGTGGCACCGAGTCGGTGCTTTTTT
4|sgACTR3B_1|ACTR3B	AGGTAGTTGACCAAGCTCAA	0	0	0	0	0	0	0	0	0	57180	ACTR3B	ACTR3B	4|sg_hACTR3B_01|ACTR3B	ACTR3B	ACCGAGGTAGTTGACCAAGCTCAAGTTTAAGAGCTATGCTGGAAACAGCATAGCAAGTTTAAATAAGGCTAGTCCGTTATCAACTTGAAAAAGTGGCACCGAGTCGGTGCTTTTTT
4|sgACTR3B_2|ACTR3B	TACTGTTTGATCCACTTCCG	1	42940	0	0	1	0	0	27	4	57180	ACTR3B	ACTR3B	4|sg_hACTR3B_02|ACTR3B	ACTR3B	ACCGTACTGTTTGATCCACTTCCGGTTTAAGAGCTATGCTGGAAACAGCATAGCAAGTTTAAATAAGGCTAGTCCGTTATCAACTTGAAAAAGTGGCACCGAGTCGGTGCTTTTTT
4|sgACTR3B_3|ACTR3B	TGGGTGAACGTACGTTAACG	138765	3	0	3	1	3	2	13	5	57180	ACTR3B	ACTR3B	4|sg_hACTR3B_03|ACTR3B	ACTR3B	ACCGTGGGTGAACGTACGTTAACGGTTTAAGAGCTATGCTGGAAACAGCATAGCAAGTTTAAATAAGGCTAGTCCGTTATCAACTTGAAAAAGTGGCACCGAGTCGGTGCTTTTTT
4|sgACTR3B_4|ACTR3B	TTTGAATCATTTAACGTACC	0	0	0	0	0	0	0	0	0	57180	ACTR3B	ACTR3B	4|sg_hACTR3B_04|ACTR3B	ACTR3B	ACCGTTTGAATCATTTAACGTACCGTTTAAGAGCTATGCTGGAAACAGCATAGCAAGTTTAAATAAGGCTAGTCCGTTATCAACTTGAAAAAGTGGCACCGAGTCGGTGCTTTTTT
4|sgACTR3C_1|ACTR3C	CATTTGCCCCGATATAGTCA	0	1	22597	0	0	1	0	0	0	653857	ACTR3C	ACTR3C	4|sg_hACTR3C_01|ACTR3C	ACTR3C	ACCGCATTTGCCCCGATATAGTCAGTTTAAGAGCTATGCTGGAAACAGCATAGCAAGTTTAAATAAGGCTAGTCCGTTATCAACTTGAAAAAGTGGCACCGAGTCGGTGCTTTTTT
4|sgACTR3C_2|ACTR3C	GCTTACCACTGGGATAACAT	0	0	0	0	0	0	0	0	0	653857	ACTR3C	ACTR3C	4|sg_hACTR3C_02|ACTR3C	ACTR3C	ACCGGCTTACCACTGGGATAACATGTTTAAGAGCTATGCTGGAAACAGCATAGCAAGTTTAAATAAGGCTAGTCCGTTATCAACTTGAAAAAGTGGCACCGAGTCGGTGCTTTTTT
4|sgACTR3C_3|ACTR3C	TACTGTTTGATCCACTTCTG	0	57	0	0	0	1	1	6117	0	653857	ACTR3C	ACTR3C	4|sg_hACTR3C_03|ACTR3C	ACTR3C	ACCGTACTGTTTGATCCACTTCTGGTTTAAGAGCTATGCTGGAAACAGCATAGCAAGTTTAAATAAGGCTAGTCCGTTATCAACTTGAAAAAGTGGCACCGAGTCGGTGCTTTTTT
4|sgACTR3C_4|ACTR3C	TGGGTGAACGTACATTAACG	112	0	0	0	0	0	0	0	0	653857	ACTR3C	ACTR3C	4|sg_hACTR3C_04|ACTR3C	ACTR3C	ACCGTGGGTGAACGTACATTAACGGTTTAAGAGCTATGCTGGAAACAGCATAGCAAGTTTAAATAAGGCTAGTCCGTTATCAACTTGAAAAAGTGGCACCGAGTCGGTGCTTTTTT
4|sgACTR5_1|ACTR5	CGGGACACGCCCAGCCAGCG	0	0	0	1	0	0	0	0	0	79913	ACTR5	ACTR5	4|sg_hACTR5_01|ACTR5	ACTR5	ACCGCGGGACACGCCCAGCCAGCGGTTTAAGAGCTATGCTGGAAACAGCATAGCAAGTTTAAATAAGGCTAGTCCGTTATCAACTTGAAAAAGTGGCACCGAGTCGGTGCTTTTTT
4|sgACTR5_2|ACTR5	TCATTTGCCGTGAATACAGT	0	0	0	0	0	0	0	0	0	79913	ACTR5	ACTR5	4|sg_hACTR5_02|ACTR5	ACTR5	ACCGTCATTTGCCGTGAATACAGTGTTTAAGAGCTATGCTGGAAACAGCATAGCAAGTTTAAATAAGGCTAGTCCGTTATCAACTTGAAAAAGTGGCACCGAGTCGGTGCTTTTTT
4|sgACTR5_3|ACTR5	TGAGCACAGCTACATCGCTG	0	0	0	0	0	0	0	0	0	79913	ACTR5	ACTR5	4|sg_hACTR5_03|ACTR5	ACTR5	ACCGTGAGCACAGCTACATCGCTGGTTTAAGAGCTATGCTGGAAACAGCATAGCAAGTTTAAATAAGGCTAGTCCGTTATCAACTTGAAAAAGTGGCACCGAGTCGGTGCTTTTTT
4|sgACTR5_4|ACTR5	TGGGTAAAACATGCGTACAC	0	0	0	0	0	0	0	0	0	79913	ACTR5	ACTR5	4|sg_hACTR5_04|ACTR5	ACTR5	ACCGTGGGTAAAACATGCGTACACGTTTAAGAGCTATGCTGGAAACAGCATAGCAAGTTTAAATAAGGCTAGTCCGTTATCAACTTGAAAAAGTGGCACCGAGTCGGTGCTTTTTT
4|sgACTR6_1|ACTR6	AGATGTATGCTATGTGTCTC	0	0	0	0	0	0	0	0	0	64431	ACTR6	ACTR6	4|sg_hACTR6_01|ACTR6	ACTR6	ACCGAGATGTATGCTATGTGTCTCGTTTAAGAGCTATGCTGGAAACAGCATAGCAAGTTTAAATAAGGCTAGTCCGTTATCAACTTGAAAAAGTGGCACCGAGTCGGTGCTTTTTT
4|sgACTR6_2|ACTR6	ATAATTCGGAAGGATTATCT	0	0	0	0	0	0	0	0	0	64431	ACTR6	ACTR6	4|sg_hACTR6_02|ACTR6	ACTR6	ACCGATAATTCGGAAGGATTATCTGTTTAAGAGCTATGCTGGAAACAGCATAGCAAGTTTAAATAAGGCTAGTCCGTTATCAACTTGAAAAAGTGGCACCGAGTCGGTGCTTTTTT
4|sgACTR6_3|ACTR6	CTCCCCTTGCAGGATAAATG	0	0	0	0	0	0	0	0	0	64431	ACTR6	ACTR6	4|sg_hACTR6_03|ACTR6	ACTR6	ACCGCTCCCCTTGCAGGATAAATGGTTTAAGAGCTATGCTGGAAACAGCATAGCAAGTTTAAATAAGGCTAGTCCGTTATCAACTTGAAAAAGTGGCACCGAGTCGGTGCTTTTTT
4|sgACTR6_4|ACTR6	GGATGTAAAAGAGTCCAGAA	0	0	0	0	0	0	0	0	0	64431	ACTR6	ACTR6	4|sg_hACTR6_04|ACTR6	ACTR6	ACCGGGATGTAAAAGAGTCCAGAAGTTTAAGAGCTATGCTGGAAACAGCATAGCAAGTTTAAATAAGGCTAGTCCGTTATCAACTTGAAAAAGTGGCACCGAGTCGGTGCTTTTTT
4|sgACTR8_1|ACTR8	AGCCAACTGTCCTTGTATAG	0	0	0	0	0	0	0	0	0	93973	ACTR8	ACTR8	4|sg_hACTR8_01|ACTR8	ACTR8	ACCGAGCCAACTGTCCTTGTATAGGTTTAAGAGCTATGCTGGAAACAGCATAGCAAGTTTAAATAAGGCTAGTCCGTTATCAACTTGAAAAAGTGGCACCGAGTCGGTGCTTTTTT
4|sgACTR8_2|ACTR8	CAACGATTCCAAAAGTTGCG	0	0	0	0	0	0	0	0	1	93973	ACTR8	ACTR8	4|sg_hACTR8_02|ACTR8	ACTR8	ACCGCAACGATTCCAAAAGTTGCGGTTTAAGAGCTATGCTGGAAACAGCATAGCAAGTTTAAATAAGGCTAGTCCGTTATCAACTTGAAAAAGTGGCACCGAGTCGGTGCTTTTTT
4|sgACTR8_3|ACTR8	CACGTGTATTGTAGACGTTG	0	0	0	0	0	0	0	0	0	93973	ACTR8	ACTR8	4|sg_hACTR8_03|ACTR8	ACTR8	ACCGCACGTGTATTGTAGACGTTGGTTTAAGAGCTATGCTGGAAACAGCATAGCAAGTTTAAATAAGGCTAGTCCGTTATCAACTTGAAAAAGTGGCACCGAGTCGGTGCTTTTTT
4|sgACTR8_4|ACTR8	CTTCTCCTACTAAATACTCA	0	0	0	0	0	0	0	0	0	93973	ACTR8	ACTR8	4|sg_hACTR8_04|ACTR8	ACTR8	ACCGCTTCTCCTACTAAATACTCAGTTTAAGAGCTATGCTGGAAACAGCATAGCAAGTTTAAATAAGGCTAGTCCGTTATCAACTTGAAAAAGTGGCACCGAGTCGGTGCTTTTTT
4|sgACTRT1_1|ACTRT1	ACGGAGCTGATGACATGGCG	0	0	0	0	0	0	0	0	0	139741	ACTRT1	ACTRT1	4|sg_hACTRT1_01|ACTRT1	ACTRT1	ACCGACGGAGCTGATGACATGGCGGTTTAAGAGCTATGCTGGAAACAGCATAGCAAGTTTAAATAAGGCTAGTCCGTTATCAACTTGAAAAAGTGGCACCGAGTCGGTGCTTTTTT
4|sgACTRT1_2|ACTRT1	GGTAACAGGATGGGATGACA	2	2	1	25	0	1	83860	1	1	139741	ACTRT1	ACTRT1	4|sg_hACTRT1_02|ACTRT1	ACTRT1	ACCGGGTAACAGGATGGGATGACAGTTTAAGAGCTATGCTGGAAACAGCATAGCAAGTTTAAATAAGGCTAGTCCGTTATCAACTTGAAAAAGTGGCACCGAGTCGGTGCTTTTTT
4|sgACTRT1_3|ACTRT1	TGATTAGACAGGTAGAAACC	0	0	0	0	0	0	0	0	0	139741	ACTRT1	ACTRT1	4|sg_hACTRT1_03|ACTRT1	ACTRT1	ACCGTGATTAGACAGGTAGAAACCGTTTAAGAGCTATGCTGGAAACAGCATAGCAAGTTTAAATAAGGCTAGTCCGTTATCAACTTGAAAAAGTGGCACCGAGTCGGTGCTTTTTT
4|sgACTRT1_4|ACTRT1	TTAATCAGAAGTACTTCGTG	0	0	0	0	0	0	0	0	0	139741	ACTRT1	ACTRT1	4|sg_hACTRT1_04|ACTRT1	ACTRT1	ACCGTTAATCAGAAGTACTTCGTGGTTTAAGAGCTATGCTGGAAACAGCATAGCAAGTTTAAATAAGGCTAGTCCGTTATCAACTTGAAAAAGTGGCACCGAGTCGGTGCTTTTTT
4|sgACTRT2_1|ACTRT2	CGCAGTCACCAAGCTCCACG	0	0	0	0	0	0	0	0	0	140625	ACTRT2	ACTRT2	4|sg_hACTRT2_01|ACTRT2	ACTRT2	ACCGCGCAGTCACCAAGCTCCACGGTTTAAGAGCTATGCTGGAAACAGCATAGCAAGTTTAAATAAGGCTAGTCCGTTATCAACTTGAAAAAGTGGCACCGAGTCGGTGCTTTTTT
4|sgACTRT2_2|ACTRT2	CGTGCCCGCTTTCTACCTGT	0	0	0	0	0	0	0	0	0	140625	ACTRT2	ACTRT2	4|sg_hACTRT2_02|ACTRT2	ACTRT2	ACCGCGTGCCCGCTTTCTACCTGTGTTTAAGAGCTATGCTGGAAACAGCATAGCAAGTTTAAATAAGGCTAGTCCGTTATCAACTTGAAAAAGTGGCACCGAGTCGGTGCTTTTTT
4|sgACTRT2_3|ACTRT2	GAATTTCAGGTGCCCCACGA	0	0	0	0	0	0	0	0	0	140625	ACTRT2	ACTRT2	4|sg_hACTRT2_03|ACTRT2	ACTRT2	ACCGGAATTTCAGGTGCCCCACGAGTTTAAGAGCTATGCTGGAAACAGCATAGCAAGTTTAAATAAGGCTAGTCCGTTATCAACTTGAAAAAGTGGCACCGAGTCGGTGCTTTTTT
4|sgACTRT2_4|ACTRT2	GATCAGGCCACGCTCGAAAG	0	0	0	0	0	0	0	0	0	140625	ACTRT2	ACTRT2	4|sg_hACTRT2_04|ACTRT2	ACTRT2	ACCGGATCAGGCCACGCTCGAAAGGTTTAAGAGCTATGCTGGAAACAGCATAGCAAGTTTAAATAAGGCTAGTCCGTTATCAACTTGAAAAAGTGGCACCGAGTCGGTGCTTTTTT
4|sgACTRT3_1|ACTRT3	AATGTTCGGGTAGATAAACT	0	34294	0	0	0	1	0	0	8	84517	ACTRT3	ACTRT3	4|sg_hACTRT3_01|ACTRT3	ACTRT3	ACCGAATGTTCGGGTAGATAAACTGTTTAAGAGCTATGCTGGAAACAGCATAGCAAGTTTAAATAAGGCTAGTCCGTTATCAACTTGAAAAAGTGGCACCGAGTCGGTGCTTTTTT
4|sgACTRT3_2|ACTRT3	CACTGAGCAACATGATACCA	0	0	0	0	0	0	0	0	0	84517	ACTRT3	ACTRT3	4|sg_hACTRT3_02|ACTRT3	ACTRT3	ACCGCACTGAGCAACATGATACCAGTTTAAGAGCTATGCTGGAAACAGCATAGCAAGTTTAAATAAGGCTAGTCCGTTATCAACTTGAAAAAGTGGCACCGAGTCGGTGCTTTTTT
4|sgACTRT3_3|ACTRT3	GGCGGGCTAGAACTCTGCGT	0	0	0	0	0	0	0	0	0	84517	ACTRT3	ACTRT3	4|sg_hACTRT3_03|ACTRT3	ACTRT3	ACCGGGCGGGCTAGAACTCTGCGTGTTTAAGAGCTATGCTGGAAACAGCATAGCAAGTTTAAATAAGGCTAGTCCGTTATCAACTTGAAAAAGTGGCACCGAGTCGGTGCTTTTTT
4|sgACTRT3_4|ACTRT3	TGTGGCAATGAACTACGAAG	0	0	0	0	0	0	0	0	0	84517	ACTRT3	ACTRT3	4|sg_hACTRT3_04|ACTRT3	ACTRT3	ACCGTGTGGCAATGAACTACGAAGGTTTAAGAGCTATGCTGGAAACAGCATAGCAAGTTTAAATAAGGCTAGTCCGTTATCAACTTGAAAAAGTGGCACCGAGTCGGTGCTTTTTT
4|sgACVR1_1|ACVR1	ATTACACTGTTGGAGTGTGT	0	0	0	0	0	0	0	0	0	90	ACVR1	ACVR1	4|sg_hACVR1_01|ACVR1	ACVR1	ACCGATTACACTGTTGGAGTGTGTGTTTAAGAGCTATGCTGGAAACAGCATAGCAAGTTTAAATAAGGCTAGTCCGTTATCAACTTGAAAAAGTGGCACCGAGTCGGTGCTTTTTT
4|sgACVR1_2|ACVR1	CCATGACTTCTCATCACGGG	0	0	0	0	1	0	0	0	0	90	ACVR1	ACVR1	4|sg_hACVR1_02|ACVR1	ACVR1	ACCGCCATGACTTCTCATCACGGGGTTTAAGAGCTATGCTGGAAACAGCATAGCAAGTTTAAATAAGGCTAGTCCGTTATCAACTTGAAAAAGTGGCACCGAGTCGGTGCTTTTTT
4|sgACVR1_3|ACVR1	CTGGTGTAACAGGAACATCA	0	0	0	0	0	0	0	0	0	90	ACVR1	ACVR1	4|sg_hACVR1_03|ACVR1	ACVR1	ACCGCTGGTGTAACAGGAACATCAGTTTAAGAGCTATGCTGGAAACAGCATAGCAAGTTTAAATAAGGCTAGTCCGTTATCAACTTGAAAAAGTGGCACCGAGTCGGTGCTTTTTT
4|sgACVR1_4|ACVR1	GCCATCGTTGATGCTCAGTG	0	0	0	0	0	0	0	0	0	90	ACVR1	ACVR1	4|sg_hACVR1_04|ACVR1	ACVR1	ACCGGCCATCGTTGATGCTCAGTGGTTTAAGAGCTATGCTGGAAACAGCATAGCAAGTTTAAATAAGGCTAGTCCGTTATCAACTTGAAAAAGTGGCACCGAGTCGGTGCTTTTTT
4|sgACVR1B_1|ACVR1B	AAGAGATTATTGGCAAGGGT	0	0	0	0	0	0	0	0	0	91	ACVR1B	ACVR1B	4|sg_hACVR1B_01|ACVR1B	ACVR1B	ACCGAAGAGATTATTGGCAAGGGTGTTTAAGAGCTATGCTGGAAACAGCATAGCAAGTTTAAATAAGGCTAGTCCGTTATCAACTTGAAAAAGTGGCACCGAGTCGGTGCTTTTTT
4|sgACVR1B_2|ACVR1B	ACTTGACTCAGGTCACCTCA	0	0	0	0	0	0	0	0	0	91	ACVR1B	ACVR1B	4|sg_hACVR1B_02|ACVR1B	ACVR1B	ACCGACTTGACTCAGGTCACCTCAGTTTAAGAGCTATGCTGGAAACAGCATAGCAAGTTTAAATAAGGCTAGTCCGTTATCAACTTGAAAAAGTGGCACCGAGTCGGTGCTTTTTT
4|sgACVR1B_3|ACVR1B	CCGGTTCAGATAATCAAACA	0	0	0	0	0	0	0	0	0	91	ACVR1B	ACVR1B	4|sg_hACVR1B_03|ACVR1B	ACVR1B	ACCGCCGGTTCAGATAATCAAACAGTTTAAGAGCTATGCTGGAAACAGCATAGCAAGTTTAAATAAGGCTAGTCCGTTATCAACTTGAAAAAGTGGCACCGAGTCGGTGCTTTTTT
4|sgACVR1B_4|ACVR1B	CTACACGTGTGAGACAGATG	17	6	0	2	3	1	1	3	69500	91	ACVR1B	ACVR1B	4|sg_hACVR1B_04|ACVR1B	ACVR1B	ACCGCTACACGTGTGAGACAGATGGTTTAAGAGCTATGCTGGAAACAGCATAGCAAGTTTAAATAAGGCTAGTCCGTTATCAACTTGAAAAAGTGGCACCGAGTCGGTGCTTTTTT
4|sgACVR1C_1|ACVR1C	ATTGTCCTTTGAACCAACAG	0	0	0	0	0	0	0	0	0	130399	ACVR1C	ACVR1C	4|sg_hACVR1C_01|ACVR1C	ACVR1C	ACCGATTGTCCTTTGAACCAACAGGTTTAAGAGCTATGCTGGAAACAGCATAGCAAGTTTAAATAAGGCTAGTCCGTTATCAACTTGAAAAAGTGGCACCGAGTCGGTGCTTTTTT
4|sgACVR1C_2|ACVR1C	CCAAGATCTTTCATCTCTGG	0	0	0	0	0	0	0	0	0	130399	ACVR1C	ACVR1C	4|sg_hACVR1C_02|ACVR1C	ACVR1C	ACCGCCAAGATCTTTCATCTCTGGGTTTAAGAGCTATGCTGGAAACAGCATAGCAAGTTTAAATAAGGCTAGTCCGTTATCAACTTGAAAAAGTGGCACCGAGTCGGTGCTTTTTT
4|sgACVR1C_3|ACVR1C	CTGGCGCTCTCAATTGCTAG	0	0	0	0	0	0	0	23076	0	130399	ACVR1C	ACVR1C	4|sg_hACVR1C_03|ACVR1C	ACVR1C	ACCGCTGGCGCTCTCAATTGCTAGGTTTAAGAGCTATGCTGGAAACAGCATAGCAAGTTTAAATAAGGCTAGTCCGTTATCAACTTGAAAAAGTGGCACCGAGTCGGTGCTTTTTT
4|sgACVR1C_4|ACVR1C	TGTAGGAGCACTGTCGACCC	0	0	0	0	0	0	0	0	0	130399	ACVR1C	ACVR1C	4|sg_hACVR1C_04|ACVR1C	ACVR1C	ACCGTGTAGGAGCACTGTCGACCCGTTTAAGAGCTATGCTGGAAACAGCATAGCAAGTTTAAATAAGGCTAGTCCGTTATCAACTTGAAAAAGTGGCACCGAGTCGGTGCTTTTTT
4|sgACVR2A_1|ACVR2A	AGTGGTTTCAAACCTAGTAA	0	0	0	0	0	0	0	0	0	92	ACVR2A	ACVR2A	4|sg_hACVR2A_01|ACVR2A	ACVR2A	ACCGAGTGGTTTCAAACCTAGTAAGTTTAAGAGCTATGCTGGAAACAGCATAGCAAGTTTAAATAAGGCTAGTCCGTTATCAACTTGAAAAAGTGGCACCGAGTCGGTGCTTTTTT
4|sgACVR2A_2|ACVR2A	ATTGCAGAAACCATGGCTAG	0	0	0	0	0	0	0	0	0	92	ACVR2A	ACVR2A	4|sg_hACVR2A_02|ACVR2A	ACVR2A	ACCGATTGCAGAAACCATGGCTAGGTTTAAGAGCTATGCTGGAAACAGCATAGCAAGTTTAAATAAGGCTAGTCCGTTATCAACTTGAAAAAGTGGCACCGAGTCGGTGCTTTTTT
4|sgACVR2A_3|ACVR2A	CCAAAGATCCACATCAACAC	0	0	0	0	0	0	0	0	0	92	ACVR2A	ACVR2A	4|sg_hACVR2A_03|ACVR2A	ACVR2A	ACCGCCAAAGATCCACATCAACACGTTTAAGAGCTATGCTGGAAACAGCATAGCAAGTTTAAATAAGGCTAGTCCGTTATCAACTTGAAAAAGTGGCACCGAGTCGGTGCTTTTTT
4|sgACVR2A_4|ACVR2A	CCAGTTGCTTAACGAATATG	0	0	0	0	0	0	0	0	0	92	ACVR2A	ACVR2A	4|sg_hACVR2A_04|ACVR2A	ACVR2A	ACCGCCAGTTGCTTAACGAATATGGTTTAAGAGCTATGCTGGAAACAGCATAGCAAGTTTAAATAAGGCTAGTCCGTTATCAACTTGAAAAAGTGGCACCGAGTCGGTGCTTTTTT
4|sgACVR2B_1|ACVR2B	ACAAGCCGTCTATTGCCCAC	0	0	0	0	0	0	0	0	1	93	ACVR2B	ACVR2B	4|sg_hACVR2B_01|ACVR2B	ACVR2B	ACCGACAAGCCGTCTATTGCCCACGTTTAAGAGCTATGCTGGAAACAGCATAGCAAGTTTAAATAAGGCTAGTCCGTTATCAACTTGAAAAAGTGGCACCGAGTCGGTGCTTTTTT
4|sgACVR2B_2|ACVR2B	ATGACTTCAACTGCTACGAT	0	0	0	0	0	0	0	0	0	93	ACVR2B	ACVR2B	4|sg_hACVR2B_02|ACVR2B	ACVR2B	ACCGATGACTTCAACTGCTACGATGTTTAAGAGCTATGCTGGAAACAGCATAGCAAGTTTAAATAAGGCTAGTCCGTTATCAACTTGAAAAAGTGGCACCGAGTCGGTGCTTTTTT
4|sgACVR2B_3|ACVR2B	ATGTCCACATGACCGTAGGG	0	0	0	0	0	0	0	0	0	93	ACVR2B	ACVR2B	4|sg_hACVR2B_03|ACVR2B	ACVR2B	ACCGATGTCCACATGACCGTAGGGGTTTAAGAGCTATGCTGGAAACAGCATAGCAAGTTTAAATAAGGCTAGTCCGTTATCAACTTGAAAAAGTGGCACCGAGTCGGTGCTTTTTT
4|sgACVR2B_4|ACVR2B	CTGGAGCGCACCAACCAGAG	0	0	0	0	0	0	0	0	0	93	ACVR2B	ACVR2B	4|sg_hACVR2B_04|ACVR2B	ACVR2B	ACCGCTGGAGCGCACCAACCAGAGGTTTAAGAGCTATGCTGGAAACAGCATAGCAAGTTTAAATAAGGCTAGTCCGTTATCAACTTGAAAAAGTGGCACCGAGTCGGTGCTTTTTT
4|sgACVRL1_1|ACVRL1	AGGCACCCCCAGGAACATCG	0	0	31164	0	1	0	1	0	0	94	ACVRL1	ACVRL1	4|sg_hACVRL1_01|ACVRL1	ACVRL1	ACCGAGGCACCCCCAGGAACATCGGTTTAAGAGCTATGCTGGAAACAGCATAGCAAGTTTAAATAAGGCTAGTCCGTTATCAACTTGAAAAAGTGGCACCGAGTCGGTGCTTTTTT
4|sgACVRL1_2|ACVRL1	CCAGGACTGTTCATCCCTCG	0	0	26055	0	0	0	0	0	2	94	ACVRL1	ACVRL1	4|sg_hACVRL1_02|ACVRL1	ACVRL1	ACCGCCAGGACTGTTCATCCCTCGGTTTAAGAGCTATGCTGGAAACAGCATAGCAAGTTTAAATAAGGCTAGTCCGTTATCAACTTGAAAAAGTGGCACCGAGTCGGTGCTTTTTT
4|sgACVRL1_3|ACVRL1	CTGCGTGCTCGAGTTGCGGG	0	0	0	0	0	0	0	0	0	94	ACVRL1	ACVRL1	4|sg_hACVRL1_03|ACVRL1	ACVRL1	ACCGCTGCGTGCTCGAGTTGCGGGGTTTAAGAGCTATGCTGGAAACAGCATAGCAAGTTTAAATAAGGCTAGTCCGTTATCAACTTGAAAAAGTGGCACCGAGTCGGTGCTTTTTT
4|sgACVRL1_4|ACVRL1	TGGACAGTGACTGCACCACA	0	0	0	0	0	0	0	0	0	94	ACVRL1	ACVRL1	4|sg_hACVRL1_04|ACVRL1	ACVRL1	ACCGTGGACAGTGACTGCACCACAGTTTAAGAGCTATGCTGGAAACAGCATAGCAAGTTTAAATAAGGCTAGTCCGTTATCAACTTGAAAAAGTGGCACCGAGTCGGTGCTTTTTT
4|sgACY1_1|ACY1	AGGCACAAAGGTCATGTGGA	0	0	0	0	0	0	0	0	0	95	ACY1	ACY1	4|sg_hACY1_01|ACY1	ACY1	ACCGAGGCACAAAGGTCATGTGGAGTTTAAGAGCTATGCTGGAAACAGCATAGCAAGTTTAAATAAGGCTAGTCCGTTATCAACTTGAAAAAGTGGCACCGAGTCGGTGCTTTTTT
4|sgACY1_2|ACY1	CCATGCCTCACGCTTCATGG	0	0	0	0	0	0	0	0	0	95	ACY1	ACY1	4|sg_hACY1_02|ACY1	ACY1	ACCGCCATGCCTCACGCTTCATGGGTTTAAGAGCTATGCTGGAAACAGCATAGCAAGTTTAAATAAGGCTAGTCCGTTATCAACTTGAAAAAGTGGCACCGAGTCGGTGCTTTTTT
4|sgACY1_3|ACY1	GCTGGACAGTGCGGATACGC	0	0	1	0	0	0	0	0	0	95	ACY1	ACY1	4|sg_hACY1_03|ACY1	ACY1	ACCGGCTGGACAGTGCGGATACGCGTTTAAGAGCTATGCTGGAAACAGCATAGCAAGTTTAAATAAGGCTAGTCCGTTATCAACTTGAAAAAGTGGCACCGAGTCGGTGCTTTTTT
4|sgACY1_4|ACY1	TAGCTTAGTCAGGTTCACGG	0	0	0	0	0	1	0	0	0	95	ACY1	ACY1	4|sg_hACY1_04|ACY1	ACY1	ACCGTAGCTTAGTCAGGTTCACGGGTTTAAGAGCTATGCTGGAAACAGCATAGCAAGTTTAAATAAGGCTAGTCCGTTATCAACTTGAAAAAGTGGCACCGAGTCGGTGCTTTTTT
4|sgACY3_1|ACY3	CACCTCATATGGGTCGTCCG	0	0	0	0	0	0	0	0	0	91703	ACY3	ACY3	4|sg_hACY3_01|ACY3	ACY3	ACCGCACCTCATATGGGTCGTCCGGTTTAAGAGCTATGCTGGAAACAGCATAGCAAGTTTAAATAAGGCTAGTCCGTTATCAACTTGAAAAAGTGGCACCGAGTCGGTGCTTTTTT
4|sgACY3_2|ACY3	CTTCCTGTACCAGCGGTCTG	0	0	11894	0	0	0	0	0	1	91703	ACY3	ACY3	4|sg_hACY3_02|ACY3	ACY3	ACCGCTTCCTGTACCAGCGGTCTGGTTTAAGAGCTATGCTGGAAACAGCATAGCAAGTTTAAATAAGGCTAGTCCGTTATCAACTTGAAAAAGTGGCACCGAGTCGGTGCTTTTTT
4|sgACY3_3|ACY3	GTGCATGGCAAAGACTTCGT	5	5	0	0	0	1	0	3	53724	91703	ACY3	ACY3	4|sg_hACY3_03|ACY3	ACY3	ACCGGTGCATGGCAAAGACTTCGTGTTTAAGAGCTATGCTGGAAACAGCATAGCAAGTTTAAATAAGGCTAGTCCGTTATCAACTTGAAAAAGTGGCACCGAGTCGGTGCTTTTTT
4|sgACY3_4|ACY3	TGAGGTCATGGTCCACGTAG	0	0	0	0	0	0	0	0	0	91703	ACY3	ACY3	4|sg_hACY3_04|ACY3	ACY3	ACCGTGAGGTCATGGTCCACGTAGGTTTAAGAGCTATGCTGGAAACAGCATAGCAAGTTTAAATAAGGCTAGTCCGTTATCAACTTGAAAAAGTGGCACCGAGTCGGTGCTTTTTT
4|sgACYP1_1|ACYP1	ACAGTGCAAGGACAATTGCA	0	0	0	0	0	0	0	0	0	97	ACYP1	ACYP1	4|sg_hACYP1_01|ACYP1	ACYP1	ACCGACAGTGCAAGGACAATTGCAGTTTAAGAGCTATGCTGGAAACAGCATAGCAAGTTTAAATAAGGCTAGTCCGTTATCAACTTGAAAAAGTGGCACCGAGTCGGTGCTTTTTT
4|sgACYP1_2|ACYP1	TAGGCTGAGGGTAAAAAGCT	0	0	0	0	0	0	0	0	0	97	ACYP1	ACYP1	4|sg_hACYP1_02|ACYP1	ACYP1	ACCGTAGGCTGAGGGTAAAAAGCTGTTTAAGAGCTATGCTGGAAACAGCATAGCAAGTTTAAATAAGGCTAGTCCGTTATCAACTTGAAAAAGTGGCACCGAGTCGGTGCTTTTTT
4|sgACYP1_3|ACYP1	TGGGTCCAGAACACTGACCG	0	0	0	0	0	0	0	0	0	97	ACYP1	ACYP1	4|sg_hACYP1_03|ACYP1	ACYP1	ACCGTGGGTCCAGAACACTGACCGGTTTAAGAGCTATGCTGGAAACAGCATAGCAAGTTTAAATAAGGCTAGTCCGTTATCAACTTGAAAAAGTGGCACCGAGTCGGTGCTTTTTT
4|sgACYP1_4|ACYP1	TTCCTGCATATGACGCACCT	0	0	0	0	0	0	0	0	0	97	ACYP1	ACYP1	4|sg_hACYP1_04|ACYP1	ACYP1	ACCGTTCCTGCATATGACGCACCTGTTTAAGAGCTATGCTGGAAACAGCATAGCAAGTTTAAATAAGGCTAGTCCGTTATCAACTTGAAAAAGTGGCACCGAGTCGGTGCTTTTTT
4|sgACYP2_1|ACYP2	ACCAGCAAAGGCACCGTGAC	0	0	6965	0	0	0	1	0	0	98	ACYP2	ACYP2	4|sg_hACYP2_01|ACYP2	ACYP2	ACCGACCAGCAAAGGCACCGTGACGTTTAAGAGCTATGCTGGAAACAGCATAGCAAGTTTAAATAAGGCTAGTCCGTTATCAACTTGAAAAAGTGGCACCGAGTCGGTGCTTTTTT
4|sgACYP2_2|ACYP2	CGCCCAGTCACTCAAATCCG	0	0	2956	0	0	0	0	0	1	98	ACYP2	ACYP2	4|sg_hACYP2_02|ACYP2	ACYP2	ACCGCGCCCAGTCACTCAAATCCGGTTTAAGAGCTATGCTGGAAACAGCATAGCAAGTTTAAATAAGGCTAGTCCGTTATCAACTTGAAAAAGTGGCACCGAGTCGGTGCTTTTTT
4|sgACYP2_3|ACYP2	GAGGTGTTCGGAAGAGTGCA	0	0	0	0	0	0	0	0	0	98	ACYP2	ACYP2	4|sg_hACYP2_03|ACYP2	ACYP2	ACCGGAGGTGTTCGGAAGAGTGCAGTTTAAGAGCTATGCTGGAAACAGCATAGCAAGTTTAAATAAGGCTAGTCCGTTATCAACTTGAAAAAGTGGCACCGAGTCGGTGCTTTTTT
4|sgACYP2_4|ACYP2	TGAAGCTAGGAAAATAGGAG	0	1	12519	0	0	0	0	0	0	98	ACYP2	ACYP2	4|sg_hACYP2_04|ACYP2	ACYP2	ACCGTGAAGCTAGGAAAATAGGAGGTTTAAGAGCTATGCTGGAAACAGCATAGCAAGTTTAAATAAGGCTAGTCCGTTATCAACTTGAAAAAGTGGCACCGAGTCGGTGCTTTTTT
4|sgADA_1|ADA	CACAGACTGGTCCCCCAAGG	0	0	0	0	0	0	0	0	0	100	ADA	ADA	4|sg_hADA_01|ADA	ADA	ACCGCACAGACTGGTCCCCCAAGGGTTTAAGAGCTATGCTGGAAACAGCATAGCAAGTTTAAATAAGGCTAGTCCGTTATCAACTTGAAAAAGTGGCACCGAGTCGGTGCTTTTTT
4|sgADA_2|ADA	TCACCGTACTGTCCACGCCG	0	0	0	0	0	0	0	0	0	100	ADA	ADA	4|sg_hADA_02|ADA	ADA	ACCGTCACCGTACTGTCCACGCCGGTTTAAGAGCTATGCTGGAAACAGCATAGCAAGTTTAAATAAGGCTAGTCCGTTATCAACTTGAAAAAGTGGCACCGAGTCGGTGCTTTTTT
4|sgADA_3|ADA	TCCCAGCTAACACAGCAGAG	0	0	0	0	0	0	1	0	1	100	ADA	ADA	4|sg_hADA_03|ADA	ADA	ACCGTCCCAGCTAACACAGCAGAGGTTTAAGAGCTATGCTGGAAACAGCATAGCAAGTTTAAATAAGGCTAGTCCGTTATCAACTTGAAAAAGTGGCACCGAGTCGGTGCTTTTTT
4|sgADA_4|ADA	TGGACATACTCAAGACAGAG	0	0	0	0	0	0	0	0	0	100	ADA	ADA	4|sg_hADA_04|ADA	ADA	ACCGTGGACATACTCAAGACAGAGGTTTAAGAGCTATGCTGGAAACAGCATAGCAAGTTTAAATAAGGCTAGTCCGTTATCAACTTGAAAAAGTGGCACCGAGTCGGTGCTTTTTT
4|sgADAD1_1|ADAD1	AACTGGTGCAAGGCTGACAC	0	0	0	0	0	0	0	0	0	132612	ADAD1	ADAD1	4|sg_hADAD1_01|ADAD1	ADAD1	ACCGAACTGGTGCAAGGCTGACACGTTTAAGAGCTATGCTGGAAACAGCATAGCAAGTTTAAATAAGGCTAGTCCGTTATCAACTTGAAAAAGTGGCACCGAGTCGGTGCTTTTTT
4|sgADAD1_2|ADAD1	AGGTGAATACAATTACAGCC	0	0	0	0	0	0	0	0	0	132612	ADAD1	ADAD1	4|sg_hADAD1_02|ADAD1	ADAD1	ACCGAGGTGAATACAATTACAGCCGTTTAAGAGCTATGCTGGAAACAGCATAGCAAGTTTAAATAAGGCTAGTCCGTTATCAACTTGAAAAAGTGGCACCGAGTCGGTGCTTTTTT
4|sgADAD1_3|ADAD1	CGATAACTACACCCACAGGA	0	0	0	0	0	0	0	0	0	132612	ADAD1	ADAD1	4|sg_hADAD1_03|ADAD1	ADAD1	ACCGCGATAACTACACCCACAGGAGTTTAAGAGCTATGCTGGAAACAGCATAGCAAGTTTAAATAAGGCTAGTCCGTTATCAACTTGAAAAAGTGGCACCGAGTCGGTGCTTTTTT
4|sgADAD1_4|ADAD1	TCAAATGCAGATATAGAATG	0	0	0	0	0	0	0	0	0	132612	ADAD1	ADAD1	4|sg_hADAD1_04|ADAD1	ADAD1	ACCGTCAAATGCAGATATAGAATGGTTTAAGAGCTATGCTGGAAACAGCATAGCAAGTTTAAATAAGGCTAGTCCGTTATCAACTTGAAAAAGTGGCACCGAGTCGGTGCTTTTTT
4|sgADAD2_1|ADAD2	ACAGAGATCCCGCGTGCCAG	0	1	1	0	0	30358	0	1	0	161931	ADAD2	ADAD2	4|sg_hADAD2_01|ADAD2	ADAD2	ACCGACAGAGATCCCGCGTGCCAGGTTTAAGAGCTATGCTGGAAACAGCATAGCAAGTTTAAATAAGGCTAGTCCGTTATCAACTTGAAAAAGTGGCACCGAGTCGGTGCTTTTTT
4|sgADAD2_2|ADAD2	CACTGCGAATAGCAAGACGG	0	0	0	0	0	0	0	0	0	161931	ADAD2	ADAD2	4|sg_hADAD2_02|ADAD2	ADAD2	ACCGCACTGCGAATAGCAAGACGGGTTTAAGAGCTATGCTGGAAACAGCATAGCAAGTTTAAATAAGGCTAGTCCGTTATCAACTTGAAAAAGTGGCACCGAGTCGGTGCTTTTTT
4|sgADAD2_3|ADAD2	TCACCTACCTACGCTCAGGG	0	0	0	0	0	0	0	0	0	161931	ADAD2	ADAD2	4|sg_hADAD2_03|ADAD2	ADAD2	ACCGTCACCTACCTACGCTCAGGGGTTTAAGAGCTATGCTGGAAACAGCATAGCAAGTTTAAATAAGGCTAGTCCGTTATCAACTTGAAAAAGTGGCACCGAGTCGGTGCTTTTTT
4|sgADAD2_4|ADAD2	TTCAAATATAGAGCCCCTGG	0	0	0	0	0	0	0	0	0	161931	ADAD2	ADAD2	4|sg_hADAD2_04|ADAD2	ADAD2	ACCGTTCAAATATAGAGCCCCTGGGTTTAAGAGCTATGCTGGAAACAGCATAGCAAGTTTAAATAAGGCTAGTCCGTTATCAACTTGAAAAAGTGGCACCGAGTCGGTGCTTTTTT
4|sgADAL_1|ADAL	ACTAATGGATCCATTCAAGT	0	0	0	0	0	0	0	0	0	161823	ADAL	ADAL	4|sg_hADAL_01|ADAL	ADAL	ACCGACTAATGGATCCATTCAAGTGTTTAAGAGCTATGCTGGAAACAGCATAGCAAGTTTAAATAAGGCTAGTCCGTTATCAACTTGAAAAAGTGGCACCGAGTCGGTGCTTTTTT
4|sgADAL_2|ADAL	CAATCACAGTCATCTGATCG	5	1	2	0	0	3	0	46353	0	161823	ADAL	ADAL	4|sg_hADAL_02|ADAL	ADAL	ACCGCAATCACAGTCATCTGATCGGTTTAAGAGCTATGCTGGAAACAGCATAGCAAGTTTAAATAAGGCTAGTCCGTTATCAACTTGAAAAAGTGGCACCGAGTCGGTGCTTTTTT
4|sgADAL_3|ADAL	GGAGACTGTAAAACTTGCCG	0	0	0	0	0	0	0	0	0	161823	ADAL	ADAL	4|sg_hADAL_03|ADAL	ADAL	ACCGGGAGACTGTAAAACTTGCCGGTTTAAGAGCTATGCTGGAAACAGCATAGCAAGTTTAAATAAGGCTAGTCCGTTATCAACTTGAAAAAGTGGCACCGAGTCGGTGCTTTTTT
4|sgADAL_4|ADAL	TATGTGGAATCTATACTTGA	0	0	0	0	0	0	0	0	0	161823	ADAL	ADAL	4|sg_hADAL_04|ADAL	ADAL	ACCGTATGTGGAATCTATACTTGAGTTTAAGAGCTATGCTGGAAACAGCATAGCAAGTTTAAATAAGGCTAGTCCGTTATCAACTTGAAAAAGTGGCACCGAGTCGGTGCTTTTTT
4|sgADAM10_1|ADAM10	CCCATAAATACGGTCCTCAG	0	0	0	0	0	0	0	0	0	102	ADAM10	ADAM10	4|sg_hADAM10_01|ADAM10	ADAM10	ACCGCCCATAAATACGGTCCTCAGGTTTAAGAGCTATGCTGGAAACAGCATAGCAAGTTTAAATAAGGCTAGTCCGTTATCAACTTGAAAAAGTGGCACCGAGTCGGTGCTTTTTT
4|sgADAM10_2|ADAM10	GGAAATGGAATGGTAGAACA	0	0	0	0	0	0	0	0	0	102	ADAM10	ADAM10	4|sg_hADAM10_02|ADAM10	ADAM10	ACCGGGAAATGGAATGGTAGAACAGTTTAAGAGCTATGCTGGAAACAGCATAGCAAGTTTAAATAAGGCTAGTCCGTTATCAACTTGAAAAAGTGGCACCGAGTCGGTGCTTTTTT
4|sgADAM10_3|ADAM10	TTCCATCAATAACAGACCCA	0	0	0	0	0	0	0	0	0	102	ADAM10	ADAM10	4|sg_hADAM10_03|ADAM10	ADAM10	ACCGTTCCATCAATAACAGACCCAGTTTAAGAGCTATGCTGGAAACAGCATAGCAAGTTTAAATAAGGCTAGTCCGTTATCAACTTGAAAAAGTGGCACCGAGTCGGTGCTTTTTT
4|sgADAM10_4|ADAM10	TTTCAACCTACGAATGAAGA	0	0	0	0	0	0	0	0	0	102	ADAM10	ADAM10	4|sg_hADAM10_04|ADAM10	ADAM10	ACCGTTTCAACCTACGAATGAAGAGTTTAAGAGCTATGCTGGAAACAGCATAGCAAGTTTAAATAAGGCTAGTCCGTTATCAACTTGAAAAAGTGGCACCGAGTCGGTGCTTTTTT
4|sgADAM11_1|ADAM11	GCTCATGGTCTACCGACGGG	0	0	0	0	0	0	0	0	0	4185	ADAM11	ADAM11	4|sg_hADAM11_01|ADAM11	ADAM11	ACCGGCTCATGGTCTACCGACGGGGTTTAAGAGCTATGCTGGAAACAGCATAGCAAGTTTAAATAAGGCTAGTCCGTTATCAACTTGAAAAAGTGGCACCGAGTCGGTGCTTTTTT
4|sgADAM11_2|ADAM11	GCTCCACGTATTGCGAGGAG	0	0	0	0	0	1	0	0	0	4185	ADAM11	ADAM11	4|sg_hADAM11_02|ADAM11	ADAM11	ACCGGCTCCACGTATTGCGAGGAGGTTTAAGAGCTATGCTGGAAACAGCATAGCAAGTTTAAATAAGGCTAGTCCGTTATCAACTTGAAAAAGTGGCACCGAGTCGGTGCTTTTTT
4|sgADAM11_3|ADAM11	GTTCGAGCAGATGCGACAGT	0	0	0	0	0	0	0	0	0	4185	ADAM11	ADAM11	4|sg_hADAM11_03|ADAM11	ADAM11	ACCGGTTCGAGCAGATGCGACAGTGTTTAAGAGCTATGCTGGAAACAGCATAGCAAGTTTAAATAAGGCTAGTCCGTTATCAACTTGAAAAAGTGGCACCGAGTCGGTGCTTTTTT
4|sgADAM11_4|ADAM11	TGGGAACTTGACTTACATCG	0	0	0	0	0	0	0	0	0	4185	ADAM11	ADAM11	4|sg_hADAM11_04|ADAM11	ADAM11	ACCGTGGGAACTTGACTTACATCGGTTTAAGAGCTATGCTGGAAACAGCATAGCAAGTTTAAATAAGGCTAGTCCGTTATCAACTTGAAAAAGTGGCACCGAGTCGGTGCTTTTTT
4|sgADAM12_1|ADAM12	AAGCAATGGTACTTGCCCGG	0	0	0	0	0	0	0	0	0	8038	ADAM12	ADAM12	4|sg_hADAM12_01|ADAM12	ADAM12	ACCGAAGCAATGGTACTTGCCCGGGTTTAAGAGCTATGCTGGAAACAGCATAGCAAGTTTAAATAAGGCTAGTCCGTTATCAACTTGAAAAAGTGGCACCGAGTCGGTGCTTTTTT
4|sgADAM12_2|ADAM12	ACTGAACATTCGGATCGTGT	0	0	0	0	0	0	0	0	0	8038	ADAM12	ADAM12	4|sg_hADAM12_02|ADAM12	ADAM12	ACCGACTGAACATTCGGATCGTGTGTTTAAGAGCTATGCTGGAAACAGCATAGCAAGTTTAAATAAGGCTAGTCCGTTATCAACTTGAAAAAGTGGCACCGAGTCGGTGCTTTTTT
4|sgADAM12_3|ADAM12	GGTGATCCTTATGGCAACTG	0	0	0	0	0	0	0	0	0	8038	ADAM12	ADAM12	4|sg_hADAM12_03|ADAM12	ADAM12	ACCGGGTGATCCTTATGGCAACTGGTTTAAGAGCTATGCTGGAAACAGCATAGCAAGTTTAAATAAGGCTAGTCCGTTATCAACTTGAAAAAGTGGCACCGAGTCGGTGCTTTTTT
4|sgADAM12_4|ADAM12	TGCTGAATATTCGACTACAA	0	0	0	0	0	0	0	0	0	8038	ADAM12	ADAM12	4|sg_hADAM12_04|ADAM12	ADAM12	ACCGTGCTGAATATTCGACTACAAGTTTAAGAGCTATGCTGGAAACAGCATAGCAAGTTTAAATAAGGCTAGTCCGTTATCAACTTGAAAAAGTGGCACCGAGTCGGTGCTTTTTT
4|sgADAM15_1|ADAM15	AGTGCCACTCGTACATTCAG	0	0	0	0	0	0	0	0	0	8751	ADAM15	ADAM15	4|sg_hADAM15_01|ADAM15	ADAM15	ACCGAGTGCCACTCGTACATTCAGGTTTAAGAGCTATGCTGGAAACAGCATAGCAAGTTTAAATAAGGCTAGTCCGTTATCAACTTGAAAAAGTGGCACCGAGTCGGTGCTTTTTT
4|sgADAM15_2|ADAM15	CTCCAGACAGCTAATACTCG	0	0	0	0	0	0	0	0	0	8751	ADAM15	ADAM15	4|sg_hADAM15_02|ADAM15	ADAM15	ACCGCTCCAGACAGCTAATACTCGGTTTAAGAGCTATGCTGGAAACAGCATAGCAAGTTTAAATAAGGCTAGTCCGTTATCAACTTGAAAAAGTGGCACCGAGTCGGTGCTTTTTT
4|sgADAM15_3|ADAM15	CTGTTGTCAAAATTGCCAGG	1	0	0	0	0	0	0	4839	0	8751	ADAM15	ADAM15	4|sg_hADAM15_03|ADAM15	ADAM15	ACCGCTGTTGTCAAAATTGCCAGGGTTTAAGAGCTATGCTGGAAACAGCATAGCAAGTTTAAATAAGGCTAGTCCGTTATCAACTTGAAAAAGTGGCACCGAGTCGGTGCTTTTTT
4|sgADAM15_4|ADAM15	TGGATTCGCGAAATAATGGG	0	0	0	0	0	0	0	0	0	8751	ADAM15	ADAM15	4|sg_hADAM15_04|ADAM15	ADAM15	ACCGTGGATTCGCGAAATAATGGGGTTTAAGAGCTATGCTGGAAACAGCATAGCAAGTTTAAATAAGGCTAGTCCGTTATCAACTTGAAAAAGTGGCACCGAGTCGGTGCTTTTTT
4|sgADAM17_1|ADAM17	AATCAGAATCAACACAGATG	0	0	0	0	0	0	0	0	0	6868	ADAM17	ADAM17	4|sg_hADAM17_01|ADAM17	ADAM17	ACCGAATCAGAATCAACACAGATGGTTTAAGAGCTATGCTGGAAACAGCATAGCAAGTTTAAATAAGGCTAGTCCGTTATCAACTTGAAAAAGTGGCACCGAGTCGGTGCTTTTTT
4|sgADAM17_2|ADAM17	ACAAAATTTCAAGGTCGTGG	0	0	0	0	0	0	0	0	0	6868	ADAM17	ADAM17	4|sg_hADAM17_02|ADAM17	ADAM17	ACCGACAAAATTTCAAGGTCGTGGGTTTAAGAGCTATGCTGGAAACAGCATAGCAAGTTTAAATAAGGCTAGTCCGTTATCAACTTGAAAAAGTGGCACCGAGTCGGTGCTTTTTT
4|sgADAM17_3|ADAM17	CATCGCTTCTACAGATACAT	0	0	0	0	0	0	0	0	0	6868	ADAM17	ADAM17	4|sg_hADAM17_03|ADAM17	ADAM17	ACCGCATCGCTTCTACAGATACATGTTTAAGAGCTATGCTGGAAACAGCATAGCAAGTTTAAATAAGGCTAGTCCGTTATCAACTTGAAAAAGTGGCACCGAGTCGGTGCTTTTTT
4|sgADAM17_4|ADAM17	TGGTGAAAAGCACTACAACA	0	0	0	0	0	0	0	0	0	6868	ADAM17	ADAM17	4|sg_hADAM17_04|ADAM17	ADAM17	ACCGTGGTGAAAAGCACTACAACAGTTTAAGAGCTATGCTGGAAACAGCATAGCAAGTTTAAATAAGGCTAGTCCGTTATCAACTTGAAAAAGTGGCACCGAGTCGGTGCTTTTTT
4|sgADAM18_1|ADAM18	AAAATCCCATTACCACACAC	0	0	0	0	0	0	0	0	0	8749	ADAM18	ADAM18	4|sg_hADAM18_01|ADAM18	ADAM18	ACCGAAAATCCCATTACCACACACGTTTAAGAGCTATGCTGGAAACAGCATAGCAAGTTTAAATAAGGCTAGTCCGTTATCAACTTGAAAAAGTGGCACCGAGTCGGTGCTTTTTT
4|sgADAM18_2|ADAM18	AGTAAGTATGCTATGTCATG	0	0	0	0	0	0	0	0	0	8749	ADAM18	ADAM18	4|sg_hADAM18_02|ADAM18	ADAM18	ACCGAGTAAGTATGCTATGTCATGGTTTAAGAGCTATGCTGGAAACAGCATAGCAAGTTTAAATAAGGCTAGTCCGTTATCAACTTGAAAAAGTGGCACCGAGTCGGTGCTTTTTT
4|sgADAM18_3|ADAM18	AGTGCCTGCTATTGACAACT	0	1	0	0	0	0	0	0	0	8749	ADAM18	ADAM18	4|sg_hADAM18_03|ADAM18	ADAM18	ACCGAGTGCCTGCTATTGACAACTGTTTAAGAGCTATGCTGGAAACAGCATAGCAAGTTTAAATAAGGCTAGTCCGTTATCAACTTGAAAAAGTGGCACCGAGTCGGTGCTTTTTT
4|sgADAM18_4|ADAM18	TATAACAGTCAATTTGAACT	0	0	0	1	0	0	0	0	0	8749	ADAM18	ADAM18	4|sg_hADAM18_04|ADAM18	ADAM18	ACCGTATAACAGTCAATTTGAACTGTTTAAGAGCTATGCTGGAAACAGCATAGCAAGTTTAAATAAGGCTAGTCCGTTATCAACTTGAAAAAGTGGCACCGAGTCGGTGCTTTTTT
4|sgADAM19_1|ADAM19	ATGCCTCTAATTGTACCCTG	0	0	7897	0	0	0	0	0	0	8728	ADAM19	ADAM19	4|sg_hADAM19_01|ADAM19	ADAM19	ACCGATGCCTCTAATTGTACCCTGGTTTAAGAGCTATGCTGGAAACAGCATAGCAAGTTTAAATAAGGCTAGTCCGTTATCAACTTGAAAAAGTGGCACCGAGTCGGTGCTTTTTT
4|sgADAM19_2|ADAM19	CCTCTAAATAATCAGCCACG	0	0	0	0	0	0	0	0	0	8728	ADAM19	ADAM19	4|sg_hADAM19_02|ADAM19	ADAM19	ACCGCCTCTAAATAATCAGCCACGGTTTAAGAGCTATGCTGGAAACAGCATAGCAAGTTTAAATAAGGCTAGTCCGTTATCAACTTGAAAAAGTGGCACCGAGTCGGTGCTTTTTT
4|sgADAM19_3|ADAM19	GTCACGCTCAGCACTTGCCG	0	0	0	0	0	0	0	0	0	8728	ADAM19	ADAM19	4|sg_hADAM19_03|ADAM19	ADAM19	ACCGGTCACGCTCAGCACTTGCCGGTTTAAGAGCTATGCTGGAAACAGCATAGCAAGTTTAAATAAGGCTAGTCCGTTATCAACTTGAAAAAGTGGCACCGAGTCGGTGCTTTTTT
4|sgADAM19_4|ADAM19	TGCCCAGAGATGCGAAGTGT	0	0	0	0	0	0	0	0	1	8728	ADAM19	ADAM19	4|sg_hADAM19_04|ADAM19	ADAM19	ACCGTGCCCAGAGATGCGAAGTGTGTTTAAGAGCTATGCTGGAAACAGCATAGCAAGTTTAAATAAGGCTAGTCCGTTATCAACTTGAAAAAGTGGCACCGAGTCGGTGCTTTTTT
4|sgADAM2_1|ADAM2	ATGTGTGATGCAAACTATGC	0	0	0	0	0	0	0	1005	1	2515	ADAM2	ADAM2	4|sg_hADAM2_01|ADAM2	ADAM2	ACCGATGTGTGATGCAAACTATGCGTTTAAGAGCTATGCTGGAAACAGCATAGCAAGTTTAAATAAGGCTAGTCCGTTATCAACTTGAAAAAGTGGCACCGAGTCGGTGCTTTTTT
4|sgADAM2_2|ADAM2	CTTTAAATTACAAAGCGTAG	0	0	0	0	0	0	0	0	0	2515	ADAM2	ADAM2	4|sg_hADAM2_02|ADAM2	ADAM2	ACCGCTTTAAATTACAAAGCGTAGGTTTAAGAGCTATGCTGGAAACAGCATAGCAAGTTTAAATAAGGCTAGTCCGTTATCAACTTGAAAAAGTGGCACCGAGTCGGTGCTTTTTT
4|sgADAM2_3|ADAM2	GACCTCCCTGAATATTGCAA	0	0	0	0	0	0	0	0	0	2515	ADAM2	ADAM2	4|sg_hADAM2_03|ADAM2	ADAM2	ACCGGACCTCCCTGAATATTGCAAGTTTAAGAGCTATGCTGGAAACAGCATAGCAAGTTTAAATAAGGCTAGTCCGTTATCAACTTGAAAAAGTGGCACCGAGTCGGTGCTTTTTT
4|sgADAM2_4|ADAM2	TTGAAAAAAGGATCTAAGCG	0	0	0	0	0	0	0	0	0	2515	ADAM2	ADAM2	4|sg_hADAM2_04|ADAM2	ADAM2	ACCGTTGAAAAAAGGATCTAAGCGGTTTAAGAGCTATGCTGGAAACAGCATAGCAAGTTTAAATAAGGCTAGTCCGTTATCAACTTGAAAAAGTGGCACCGAGTCGGTGCTTTTTT
4|sgADAM20_1|ADAM20	AATGTGACTGTGGAACCATA	0	0	0	0	0	0	0	0	0	8748	ADAM20	ADAM20	4|sg_hADAM20_01|ADAM20	ADAM20	ACCGAATGTGACTGTGGAACCATAGTTTAAGAGCTATGCTGGAAACAGCATAGCAAGTTTAAATAAGGCTAGTCCGTTATCAACTTGAAAAAGTGGCACCGAGTCGGTGCTTTTTT
4|sgADAM20_2|ADAM20	AGAGATACATTGTCCACATG	1	0	0	0	0	0	0	7040	0	8748	ADAM20	ADAM20	4|sg_hADAM20_02|ADAM20	ADAM20	ACCGAGAGATACATTGTCCACATGGTTTAAGAGCTATGCTGGAAACAGCATAGCAAGTTTAAATAAGGCTAGTCCGTTATCAACTTGAAAAAGTGGCACCGAGTCGGTGCTTTTTT
4|sgADAM20_3|ADAM20	GGTGTGTGTGCGAGCTACAG	0	0	0	0	0	0	0	0	0	8748	ADAM20	ADAM20	4|sg_hADAM20_03|ADAM20	ADAM20	ACCGGGTGTGTGTGCGAGCTACAGGTTTAAGAGCTATGCTGGAAACAGCATAGCAAGTTTAAATAAGGCTAGTCCGTTATCAACTTGAAAAAGTGGCACCGAGTCGGTGCTTTTTT
4|sgADAM20_4|ADAM20	TAAGGGCAACCAAGGACTCA	0	0	0	0	0	0	0	0	0	8748	ADAM20	ADAM20	4|sg_hADAM20_04|ADAM20	ADAM20	ACCGTAAGGGCAACCAAGGACTCAGTTTAAGAGCTATGCTGGAAACAGCATAGCAAGTTTAAATAAGGCTAGTCCGTTATCAACTTGAAAAAGTGGCACCGAGTCGGTGCTTTTTT
4|sgADAM21_1|ADAM21	ATATTCCTGCAACATAGGCT	0	0	0	0	0	0	0	0	0	8747	ADAM21	ADAM21	4|sg_hADAM21_01|ADAM21	ADAM21	ACCGATATTCCTGCAACATAGGCTGTTTAAGAGCTATGCTGGAAACAGCATAGCAAGTTTAAATAAGGCTAGTCCGTTATCAACTTGAAAAAGTGGCACCGAGTCGGTGCTTTTTT
4|sgADAM21_2|ADAM21	GAAACACGTTGTTCATATGA	0	0	0	0	0	0	0	0	0	8747	ADAM21	ADAM21	4|sg_hADAM21_02|ADAM21	ADAM21	ACCGGAAACACGTTGTTCATATGAGTTTAAGAGCTATGCTGGAAACAGCATAGCAAGTTTAAATAAGGCTAGTCCGTTATCAACTTGAAAAAGTGGCACCGAGTCGGTGCTTTTTT
4|sgADAM21_3|ADAM21	GCATAATCCTCCAAGATTGG	0	0	0	0	0	0	0	0	0	8747	ADAM21	ADAM21	4|sg_hADAM21_03|ADAM21	ADAM21	ACCGGCATAATCCTCCAAGATTGGGTTTAAGAGCTATGCTGGAAACAGCATAGCAAGTTTAAATAAGGCTAGTCCGTTATCAACTTGAAAAAGTGGCACCGAGTCGGTGCTTTTTT
4|sgADAM21_4|ADAM21	TGGGTTCAATTTCATAAGTG	0	0	0	0	0	0	0	0	0	8747	ADAM21	ADAM21	4|sg_hADAM21_04|ADAM21	ADAM21	ACCGTGGGTTCAATTTCATAAGTGGTTTAAGAGCTATGCTGGAAACAGCATAGCAAGTTTAAATAAGGCTAGTCCGTTATCAACTTGAAAAAGTGGCACCGAGTCGGTGCTTTTTT
4|sgADAM22_1|ADAM22	ATAGGTATTGGTATGTACAA	0	0	0	0	0	0	0	0	0	53616	ADAM22	ADAM22	4|sg_hADAM22_01|ADAM22	ADAM22	ACCGATAGGTATTGGTATGTACAAGTTTAAGAGCTATGCTGGAAACAGCATAGCAAGTTTAAATAAGGCTAGTCCGTTATCAACTTGAAAAAGTGGCACCGAGTCGGTGCTTTTTT
4|sgADAM22_2|ADAM22	CTTAGGTGAATGTAAATGCG	0	0	0	0	0	0	0	0	0	53616	ADAM22	ADAM22	4|sg_hADAM22_02|ADAM22	ADAM22	ACCGCTTAGGTGAATGTAAATGCGGTTTAAGAGCTATGCTGGAAACAGCATAGCAAGTTTAAATAAGGCTAGTCCGTTATCAACTTGAAAAAGTGGCACCGAGTCGGTGCTTTTTT
4|sgADAM22_3|ADAM22	TACTACCAGGGCCATATCCG	0	0	0	0	0	0	0	0	0	53616	ADAM22	ADAM22	4|sg_hADAM22_03|ADAM22	ADAM22	ACCGTACTACCAGGGCCATATCCGGTTTAAGAGCTATGCTGGAAACAGCATAGCAAGTTTAAATAAGGCTAGTCCGTTATCAACTTGAAAAAGTGGCACCGAGTCGGTGCTTTTTT
4|sgADAM22_4|ADAM22	TGTATTTCATAAACTCACGT	0	0	0	0	0	0	0	0	0	53616	ADAM22	ADAM22	4|sg_hADAM22_04|ADAM22	ADAM22	ACCGTGTATTTCATAAACTCACGTGTTTAAGAGCTATGCTGGAAACAGCATAGCAAGTTTAAATAAGGCTAGTCCGTTATCAACTTGAAAAAGTGGCACCGAGTCGGTGCTTTTTT
4|sgADAM23_1|ADAM23	ACATATAATCCAGAAAACCT	0	0	0	0	0	0	0	0	0	8745	ADAM23	ADAM23	4|sg_hADAM23_01|ADAM23	ADAM23	ACCGACATATAATCCAGAAAACCTGTTTAAGAGCTATGCTGGAAACAGCATAGCAAGTTTAAATAAGGCTAGTCCGTTATCAACTTGAAAAAGTGGCACCGAGTCGGTGCTTTTTT
4|sgADAM23_2|ADAM23	AGGCGTCAAAGACTCCAAGG	3	0	1	1	38675	1	1	0	1	8745	ADAM23	ADAM23	4|sg_hADAM23_02|ADAM23	ADAM23	ACCGAGGCGTCAAAGACTCCAAGGGTTTAAGAGCTATGCTGGAAACAGCATAGCAAGTTTAAATAAGGCTAGTCCGTTATCAACTTGAAAAAGTGGCACCGAGTCGGTGCTTTTTT
4|sgADAM23_3|ADAM23	ATATTACATCAACCAAGACT	0	0	0	0	0	0	0	0	0	8745	ADAM23	ADAM23	4|sg_hADAM23_03|ADAM23	ADAM23	ACCGATATTACATCAACCAAGACTGTTTAAGAGCTATGCTGGAAACAGCATAGCAAGTTTAAATAAGGCTAGTCCGTTATCAACTTGAAAAAGTGGCACCGAGTCGGTGCTTTTTT
4|sgADAM23_4|ADAM23	GGATACTTACAGAATCCACA	0	0	0	0	0	0	0	0	0	8745	ADAM23	ADAM23	4|sg_hADAM23_04|ADAM23	ADAM23	ACCGGGATACTTACAGAATCCACAGTTTAAGAGCTATGCTGGAAACAGCATAGCAAGTTTAAATAAGGCTAGTCCGTTATCAACTTGAAAAAGTGGCACCGAGTCGGTGCTTTTTT
4|sgADAM28_1|ADAM28	CATACTACTAGTTTGGTGGC	0	0	0	0	0	0	0	0	0	10863	ADAM28	ADAM28	4|sg_hADAM28_01|ADAM28	ADAM28	ACCGCATACTACTAGTTTGGTGGCGTTTAAGAGCTATGCTGGAAACAGCATAGCAAGTTTAAATAAGGCTAGTCCGTTATCAACTTGAAAAAGTGGCACCGAGTCGGTGCTTTTTT
4|sgADAM28_2|ADAM28	TAAAAAGCTCAATACTCATG	0	0	0	0	0	0	0	0	0	10863	ADAM28	ADAM28	4|sg_hADAM28_02|ADAM28	ADAM28	ACCGTAAAAAGCTCAATACTCATGGTTTAAGAGCTATGCTGGAAACAGCATAGCAAGTTTAAATAAGGCTAGTCCGTTATCAACTTGAAAAAGTGGCACCGAGTCGGTGCTTTTTT
4|sgADAM28_3|ADAM28	TAGGCAATGGAGCATTAAAG	0	0	0	0	0	0	0	0	0	10863	ADAM28	ADAM28	4|sg_hADAM28_03|ADAM28	ADAM28	ACCGTAGGCAATGGAGCATTAAAGGTTTAAGAGCTATGCTGGAAACAGCATAGCAAGTTTAAATAAGGCTAGTCCGTTATCAACTTGAAAAAGTGGCACCGAGTCGGTGCTTTTTT
4|sgADAM28_4|ADAM28	TTAAGCCCCATACATCGGGA	3	1	3	2	1	3	0	56330	0	10863	ADAM28	ADAM28	4|sg_hADAM28_04|ADAM28	ADAM28	ACCGTTAAGCCCCATACATCGGGAGTTTAAGAGCTATGCTGGAAACAGCATAGCAAGTTTAAATAAGGCTAGTCCGTTATCAACTTGAAAAAGTGGCACCGAGTCGGTGCTTTTTT
4|sgADAM29_1|ADAM29	ACTGCAAGTTCCTACCATCA	0	0	0	0	0	0	0	0	0	11086	ADAM29	ADAM29	4|sg_hADAM29_01|ADAM29	ADAM29	ACCGACTGCAAGTTCCTACCATCAGTTTAAGAGCTATGCTGGAAACAGCATAGCAAGTTTAAATAAGGCTAGTCCGTTATCAACTTGAAAAAGTGGCACCGAGTCGGTGCTTTTTT
4|sgADAM29_2|ADAM29	AGTCGGAGAACATTACGCCC	0	0	0	0	0	0	0	0	0	11086	ADAM29	ADAM29	4|sg_hADAM29_02|ADAM29	ADAM29	ACCGAGTCGGAGAACATTACGCCCGTTTAAGAGCTATGCTGGAAACAGCATAGCAAGTTTAAATAAGGCTAGTCCGTTATCAACTTGAAAAAGTGGCACCGAGTCGGTGCTTTTTT
4|sgADAM29_3|ADAM29	GTATACCAGATGTTCAAACG	0	0	0	0	0	0	0	0	0	11086	ADAM29	ADAM29	4|sg_hADAM29_03|ADAM29	ADAM29	ACCGGTATACCAGATGTTCAAACGGTTTAAGAGCTATGCTGGAAACAGCATAGCAAGTTTAAATAAGGCTAGTCCGTTATCAACTTGAAAAAGTGGCACCGAGTCGGTGCTTTTTT
4|sgADAM29_4|ADAM29	TTTGGGCATGAACCATGATG	0	0	0	0	0	0	0	0	0	11086	ADAM29	ADAM29	4|sg_hADAM29_04|ADAM29	ADAM29	ACCGTTTGGGCATGAACCATGATGGTTTAAGAGCTATGCTGGAAACAGCATAGCAAGTTTAAATAAGGCTAGTCCGTTATCAACTTGAAAAAGTGGCACCGAGTCGGTGCTTTTTT
4|sgADAM30_1|ADAM30	AATACTGCCAATGTAGGGGT	0	0	0	0	0	0	0	0	0	11085	ADAM30	ADAM30	4|sg_hADAM30_01|ADAM30	ADAM30	ACCGAATACTGCCAATGTAGGGGTGTTTAAGAGCTATGCTGGAAACAGCATAGCAAGTTTAAATAAGGCTAGTCCGTTATCAACTTGAAAAAGTGGCACCGAGTCGGTGCTTTTTT
4|sgADAM30_2|ADAM30	ATGTGGAAACAAAATTGTGG	0	0	0	0	0	0	0	0	0	11085	ADAM30	ADAM30	4|sg_hADAM30_02|ADAM30	ADAM30	ACCGATGTGGAAACAAAATTGTGGGTTTAAGAGCTATGCTGGAAACAGCATAGCAAGTTTAAATAAGGCTAGTCCGTTATCAACTTGAAAAAGTGGCACCGAGTCGGTGCTTTTTT
4|sgADAM30_3|ADAM30	CCAAAGGACTGCAACTACAT	0	0	0	0	0	0	0	0	0	11085	ADAM30	ADAM30	4|sg_hADAM30_03|ADAM30	ADAM30	ACCGCCAAAGGACTGCAACTACATGTTTAAGAGCTATGCTGGAAACAGCATAGCAAGTTTAAATAAGGCTAGTCCGTTATCAACTTGAAAAAGTGGCACCGAGTCGGTGCTTTTTT
4|sgADAM30_4|ADAM30	CCCCTTATGAGAATAAGGCG	0	0	0	0	0	0	0	0	0	11085	ADAM30	ADAM30	4|sg_hADAM30_04|ADAM30	ADAM30	ACCGCCCCTTATGAGAATAAGGCGGTTTAAGAGCTATGCTGGAAACAGCATAGCAAGTTTAAATAAGGCTAGTCCGTTATCAACTTGAAAAAGTGGCACCGAGTCGGTGCTTTTTT
4|sgADAM32_1|ADAM32	AAATCTCCGAAACCAGTCTG	0	0	0	0	0	0	0	0	0	203102	ADAM32	ADAM32	4|sg_hADAM32_01|ADAM32	ADAM32	ACCGAAATCTCCGAAACCAGTCTGGTTTAAGAGCTATGCTGGAAACAGCATAGCAAGTTTAAATAAGGCTAGTCCGTTATCAACTTGAAAAAGTGGCACCGAGTCGGTGCTTTTTT
4|sgADAM32_2|ADAM32	AACACTGCTCCCAAATAACG	0	0	0	0	0	0	0	0	0	203102	ADAM32	ADAM32	4|sg_hADAM32_02|ADAM32	ADAM32	ACCGAACACTGCTCCCAAATAACGGTTTAAGAGCTATGCTGGAAACAGCATAGCAAGTTTAAATAAGGCTAGTCCGTTATCAACTTGAAAAAGTGGCACCGAGTCGGTGCTTTTTT
4|sgADAM32_3|ADAM32	AAGCCTGAAAGAACAACCAA	0	0	0	0	0	0	0	0	0	203102	ADAM32	ADAM32	4|sg_hADAM32_03|ADAM32	ADAM32	ACCGAAGCCTGAAAGAACAACCAAGTTTAAGAGCTATGCTGGAAACAGCATAGCAAGTTTAAATAAGGCTAGTCCGTTATCAACTTGAAAAAGTGGCACCGAGTCGGTGCTTTTTT
4|sgADAM32_4|ADAM32	TACAATCAGGCGTTGAATGT	0	0	0	0	0	0	0	0	0	203102	ADAM32	ADAM32	4|sg_hADAM32_04|ADAM32	ADAM32	ACCGTACAATCAGGCGTTGAATGTGTTTAAGAGCTATGCTGGAAACAGCATAGCAAGTTTAAATAAGGCTAGTCCGTTATCAACTTGAAAAAGTGGCACCGAGTCGGTGCTTTTTT
4|sgADAM33_1|ADAM33	CACAGGGTGAGCCGTCCAGT	0	0	0	0	0	0	0	0	0	80332	ADAM33	ADAM33	4|sg_hADAM33_01|ADAM33	ADAM33	ACCGCACAGGGTGAGCCGTCCAGTGTTTAAGAGCTATGCTGGAAACAGCATAGCAAGTTTAAATAAGGCTAGTCCGTTATCAACTTGAAAAAGTGGCACCGAGTCGGTGCTTTTTT
4|sgADAM33_2|ADAM33	CCCCCCACCCGCGTACCCGG	0	0	0	0	0	0	0	0	0	80332	ADAM33	ADAM33	4|sg_hADAM33_02|ADAM33	ADAM33	ACCGCCCCCCACCCGCGTACCCGGGTTTAAGAGCTATGCTGGAAACAGCATAGCAAGTTTAAATAAGGCTAGTCCGTTATCAACTTGAAAAAGTGGCACCGAGTCGGTGCTTTTTT
4|sgADAM33_3|ADAM33	CTCCATCCGAAAGATCTCGT	0	0	0	0	0	0	0	0	0	80332	ADAM33	ADAM33	4|sg_hADAM33_03|ADAM33	ADAM33	ACCGCTCCATCCGAAAGATCTCGTGTTTAAGAGCTATGCTGGAAACAGCATAGCAAGTTTAAATAAGGCTAGTCCGTTATCAACTTGAAAAAGTGGCACCGAGTCGGTGCTTTTTT
4|sgADAM33_4|ADAM33	GTGGGTTTCTATGTATCCTG	0	0	0	0	0	0	0	0	0	80332	ADAM33	ADAM33	4|sg_hADAM33_04|ADAM33	ADAM33	ACCGGTGGGTTTCTATGTATCCTGGTTTAAGAGCTATGCTGGAAACAGCATAGCAAGTTTAAATAAGGCTAGTCCGTTATCAACTTGAAAAAGTGGCACCGAGTCGGTGCTTTTTT
4|sgADAM7_1|ADAM7	AAAGATCCTTAAAACACGGA	0	0	0	0	0	0	0	0	0	8756	ADAM7	ADAM7	4|sg_hADAM7_01|ADAM7	ADAM7	ACCGAAAGATCCTTAAAACACGGAGTTTAAGAGCTATGCTGGAAACAGCATAGCAAGTTTAAATAAGGCTAGTCCGTTATCAACTTGAAAAAGTGGCACCGAGTCGGTGCTTTTTT
4|sgADAM7_2|ADAM7	ACAGAATGGCACATCAACTG	0	0	0	0	0	0	0	0	0	8756	ADAM7	ADAM7	4|sg_hADAM7_02|ADAM7	ADAM7	ACCGACAGAATGGCACATCAACTGGTTTAAGAGCTATGCTGGAAACAGCATAGCAAGTTTAAATAAGGCTAGTCCGTTATCAACTTGAAAAAGTGGCACCGAGTCGGTGCTTTTTT
4|sgADAM7_3|ADAM7	CATTTGCAAATACCTGAGCA	0	0	0	0	0	0	0	0	0	8756	ADAM7	ADAM7	4|sg_hADAM7_03|ADAM7	ADAM7	ACCGCATTTGCAAATACCTGAGCAGTTTAAGAGCTATGCTGGAAACAGCATAGCAAGTTTAAATAAGGCTAGTCCGTTATCAACTTGAAAAAGTGGCACCGAGTCGGTGCTTTTTT
4|sgADAM7_4|ADAM7	CCATAAGATACCATGATCTG	0	0	0	0	0	0	0	0	0	8756	ADAM7	ADAM7	4|sg_hADAM7_04|ADAM7	ADAM7	ACCGCCATAAGATACCATGATCTGGTTTAAGAGCTATGCTGGAAACAGCATAGCAAGTTTAAATAAGGCTAGTCCGTTATCAACTTGAAAAAGTGGCACCGAGTCGGTGCTTTTTT
4|sgADAM8_1|ADAM8	AGTCCGGGTACCCCTCTACG	1	0	0	0	0	0	0	6607	0	101	ADAM8	ADAM8	4|sg_hADAM8_01|ADAM8	ADAM8	ACCGAGTCCGGGTACCCCTCTACGGTTTAAGAGCTATGCTGGAAACAGCATAGCAAGTTTAAATAAGGCTAGTCCGTTATCAACTTGAAAAAGTGGCACCGAGTCGGTGCTTTTTT
4|sgADAM8_2|ADAM8	CAAACAGGTTCCCACACACG	0	0	0	0	0	0	0	0	0	101	ADAM8	ADAM8	4|sg_hADAM8_02|ADAM8	ADAM8	ACCGCAAACAGGTTCCCACACACGGTTTAAGAGCTATGCTGGAAACAGCATAGCAAGTTTAAATAAGGCTAGTCCGTTATCAACTTGAAAAAGTGGCACCGAGTCGGTGCTTTTTT
4|sgADAM8_3|ADAM8	CCACATACAGCTCCACGTAG	0	0	0	0	0	0	0	0	0	101	ADAM8	ADAM8	4|sg_hADAM8_03|ADAM8	ADAM8	ACCGCCACATACAGCTCCACGTAGGTTTAAGAGCTATGCTGGAAACAGCATAGCAAGTTTAAATAAGGCTAGTCCGTTATCAACTTGAAAAAGTGGCACCGAGTCGGTGCTTTTTT
4|sgADAM8_4|ADAM8	CCAGCTTAGACTCACCAAGT	0	0	0	0	0	0	0	0	0	101	ADAM8	ADAM8	4|sg_hADAM8_04|ADAM8	ADAM8	ACCGCCAGCTTAGACTCACCAAGTGTTTAAGAGCTATGCTGGAAACAGCATAGCAAGTTTAAATAAGGCTAGTCCGTTATCAACTTGAAAAAGTGGCACCGAGTCGGTGCTTTTTT
4|sgADAM9_1|ADAM9	AAAAGTTTCTTATCACACGT	0	0	0	0	0	0	0	0	0	8754	ADAM9	ADAM9	4|sg_hADAM9_01|ADAM9	ADAM9	ACCGAAAAGTTTCTTATCACACGTGTTTAAGAGCTATGCTGGAAACAGCATAGCAAGTTTAAATAAGGCTAGTCCGTTATCAACTTGAAAAAGTGGCACCGAGTCGGTGCTTTTTT
4|sgADAM9_2|ADAM9	GAATTGGACCCTTGCTGCGA	0	0	0	0	0	0	0	0	0	8754	ADAM9	ADAM9	4|sg_hADAM9_02|ADAM9	ADAM9	ACCGGAATTGGACCCTTGCTGCGAGTTTAAGAGCTATGCTGGAAACAGCATAGCAAGTTTAAATAAGGCTAGTCCGTTATCAACTTGAAAAAGTGGCACCGAGTCGGTGCTTTTTT
4|sgADAM9_3|ADAM9	GCTGTTCATTGTCGTAGACA	0	0	0	0	0	0	0	0	0	8754	ADAM9	ADAM9	4|sg_hADAM9_03|ADAM9	ADAM9	ACCGGCTGTTCATTGTCGTAGACAGTTTAAGAGCTATGCTGGAAACAGCATAGCAAGTTTAAATAAGGCTAGTCCGTTATCAACTTGAAAAAGTGGCACCGAGTCGGTGCTTTTTT
4|sgADAM9_4|ADAM9	TGTGGTTTATACTTACAACA	3	2	3	178442	6	2	120	4	2	8754	ADAM9	ADAM9	4|sg_hADAM9_04|ADAM9	ADAM9	ACCGTGTGGTTTATACTTACAACAGTTTAAGAGCTATGCTGGAAACAGCATAGCAAGTTTAAATAAGGCTAGTCCGTTATCAACTTGAAAAAGTGGCACCGAGTCGGTGCTTTTTT
4|sgADAMDEC1_1|ADAMDEC1	AATGTCTTACCACATTGAGT	0	0	0	0	0	0	0	0	0	27299	ADAMDEC1	ADAMDEC1	4|sg_hADAMDEC1_01|ADAMDEC1	ADAMDEC1	ACCGAATGTCTTACCACATTGAGTGTTTAAGAGCTATGCTGGAAACAGCATAGCAAGTTTAAATAAGGCTAGTCCGTTATCAACTTGAAAAAGTGGCACCGAGTCGGTGCTTTTTT
4|sgADAMDEC1_2|ADAMDEC1	CGTCTTTACATCTAACCAGG	0	1	13707	0	0	0	0	0	1	27299	ADAMDEC1	ADAMDEC1	4|sg_hADAMDEC1_02|ADAMDEC1	ADAMDEC1	ACCGCGTCTTTACATCTAACCAGGGTTTAAGAGCTATGCTGGAAACAGCATAGCAAGTTTAAATAAGGCTAGTCCGTTATCAACTTGAAAAAGTGGCACCGAGTCGGTGCTTTTTT
4|sgADAMDEC1_3|ADAMDEC1	GATGGCACAGTTCTAACCTG	0	0	0	0	0	0	0	0	0	27299	ADAMDEC1	ADAMDEC1	4|sg_hADAMDEC1_03|ADAMDEC1	ADAMDEC1	ACCGGATGGCACAGTTCTAACCTGGTTTAAGAGCTATGCTGGAAACAGCATAGCAAGTTTAAATAAGGCTAGTCCGTTATCAACTTGAAAAAGTGGCACCGAGTCGGTGCTTTTTT
4|sgADAMDEC1_4|ADAMDEC1	TGATGTGTGAAGTATCCTCT	0	0	0	0	0	0	0	0	0	27299	ADAMDEC1	ADAMDEC1	4|sg_hADAMDEC1_04|ADAMDEC1	ADAMDEC1	ACCGTGATGTGTGAAGTATCCTCTGTTTAAGAGCTATGCTGGAAACAGCATAGCAAGTTTAAATAAGGCTAGTCCGTTATCAACTTGAAAAAGTGGCACCGAGTCGGTGCTTTTTT
4|sgADAMTS1_1|ADAMTS1	CTATGTGGAAACCATGCTTG	0	0	0	0	0	0	0	0	0	9510	ADAMTS1	ADAMTS1	4|sg_hADAMTS1_01|ADAMTS1	ADAMTS1	ACCGCTATGTGGAAACCATGCTTGGTTTAAGAGCTATGCTGGAAACAGCATAGCAAGTTTAAATAAGGCTAGTCCGTTATCAACTTGAAAAAGTGGCACCGAGTCGGTGCTTTTTT
4|sgADAMTS1_2|ADAMTS1	GAGGAGTCCAGTACACGATG	0	0	0	0	0	0	0	0	0	9510	ADAMTS1	ADAMTS1	4|sg_hADAMTS1_02|ADAMTS1	ADAMTS1	ACCGGAGGAGTCCAGTACACGATGGTTTAAGAGCTATGCTGGAAACAGCATAGCAAGTTTAAATAAGGCTAGTCCGTTATCAACTTGAAAAAGTGGCACCGAGTCGGTGCTTTTTT
4|sgADAMTS1_3|ADAMTS1	GTAATCATGTAGGCACTGCA	3	1	2	0	0	6	0	43206	0	9510	ADAMTS1	ADAMTS1	4|sg_hADAMTS1_03|ADAMTS1	ADAMTS1	ACCGGTAATCATGTAGGCACTGCAGTTTAAGAGCTATGCTGGAAACAGCATAGCAAGTTTAAATAAGGCTAGTCCGTTATCAACTTGAAAAAGTGGCACCGAGTCGGTGCTTTTTT
4|sgADAMTS1_4|ADAMTS1	CTGCCGGTTGGCATCGTACG	0	0	0	0	0	0	0	0	0	9510	ADAMTS1	ADAMTS1	4|sg_hADAMTS1_04|ADAMTS1	ADAMTS1	ACCGCTGCCGGTTGGCATCGTACGGTTTAAGAGCTATGCTGGAAACAGCATAGCAAGTTTAAATAAGGCTAGTCCGTTATCAACTTGAAAAAGTGGCACCGAGTCGGTGCTTTTTT
4|sgADAMTS10_1|ADAMTS10	ATCGCGTCAGTGTAAATACG	0	0	0	0	0	0	0	0	0	81794	ADAMTS10	ADAMTS10	4|sg_hADAMTS10_01|ADAMTS10	ADAMTS10	ACCGATCGCGTCAGTGTAAATACGGTTTAAGAGCTATGCTGGAAACAGCATAGCAAGTTTAAATAAGGCTAGTCCGTTATCAACTTGAAAAAGTGGCACCGAGTCGGTGCTTTTTT
4|sgADAMTS10_2|ADAMTS10	GGCATGAACCATGACGGCGT	0	0	0	0	0	0	0	0	0	81794	ADAMTS10	ADAMTS10	4|sg_hADAMTS10_02|ADAMTS10	ADAMTS10	ACCGGGCATGAACCATGACGGCGTGTTTAAGAGCTATGCTGGAAACAGCATAGCAAGTTTAAATAAGGCTAGTCCGTTATCAACTTGAAAAAGTGGCACCGAGTCGGTGCTTTTTT
[truncated: 76,058 more rows]
