# Supplementary material for: Identification of Novel Regulators of LINE-1 Expression via CRISPR/Cas9 Screening
Source: Research Square preprint supplement (doi:10.21203/rs.3.rs-6726282/v1), 2025-06-04
Supplement: Supplementary file 4 [file e1389a5e459005a6278b3cbd.xlsx]

## Sheet: Sample key
ID	Samples	Sample collection day post library infection	Replicate
WC1	WT sorted ORF1p up	Day 14	Replicate 1
WC2	WT sorted ORF1p down	Day 14	Replicate 1
WC3	WT sorted ORF2p up	Day 14	Replicate 1
WC6	WT unsorted	Day 18	Replicate 1
WD1	WT sorted ORF1p up	Day 14	Replicate 2
WD2	WT sorted ORF1p down	Day 14	Replicate 2
WD3	WT sorted ORF2p up	Day 14	Replicate 2
WD6	WT unsorted	Day 18	Replicate 2
MC1	MT sorted ORF1p up	Day 14	Replicate 1
MC2	MT sorted ORF1p down	Day 14	Replicate 1
MC3	MT sorted ORF2p up	Day 14	Replicate 1
MC6	MT unsorted	Day 18	Replicate 1
MD1	MT sorted ORF1p up	Day 14	Replicate 2
MD2	MT sorted ORF1p down	Day 14	Replicate 2
MD3	MT sorted ORF2p up	Day 14	Replicate 2
MD6	MT unsorted	Day 18	Replicate 2
WT: L1 dual reporter expressing WT ORF2p
MT: L1 dual reporter expressing EN/RT mutant version of ORF2p

## Sheet: raw data
sgRNA	sequence/s	Gene_Symbol	WC6	WD6	MC6	MD6	WC1	WC2	WC3	MC1	MC2	MC3	WD1	WD2	WD3	MD1	MD2	MD3	Library_count
1|CRko|sg_Non_Targeting_Human_CRko_01|Non_Targeting_Human_CRko	GTAGCGAACGTGTCCGGCGT	NegCtrl	1822	884	8678	3432	2785	2	11820	5	2	1	1310	9075	0	4031	3	0	1548
1|CRko|sg_Non_Targeting_Human_CRko_02|Non_Targeting_Human_CRko	GGCAGTCGTTCGGTTGATAT	NegCtrl	853	2995	3895	1749	9235	7519	12	28	14	21	11	17877	11	3274	12	4162	1309
1|CRko|sg_Non_Targeting_Human_CRko_03|Non_Targeting_Human_CRko	GCTAATATCGACACGGCCGC	NegCtrl	3192	2661	949	552	5183	0	0	3155	0	1	2	0	0	1	2	0	1491
1|CRko|sg_Non_Targeting_Human_CRko_04|Non_Targeting_Human_CRko	GCGTTAGTCACTTAGCTCGA	NegCtrl	3317	3615	2181	637	0	0	1	1	1	1	0	0	0	0	3600	2812	1377
1|CRko|sg_Non_Targeting_Human_CRko_05|Non_Targeting_Human_CRko	GCAACTATTGGAATACGTGA	NegCtrl	498	2504	4609	3477	1	6244	1	1	0	0	836	1	0	1	2	9948	1316
1|CRko|sg_Non_Targeting_Human_CRko_06|Non_Targeting_Human_CRko	GTTACCTTCGCTCGTCTATA	NegCtrl	1106	1208	3005	1706	1	2	0	266	2043	4	927	0	0	0	5031	2	1189
1|CRko|sg_Non_Targeting_Human_CRko_07|Non_Targeting_Human_CRko	GTACCGAGCACCACAGGCCG	NegCtrl	3698	3046	2029	2906	2	5690	0	3112	1743	2778	1616	12149	12444	1	3	2	1612
1|CRko|sg_Non_Targeting_Human_CRko_08|Non_Targeting_Human_CRko	GTAAGATGCTGCTCACCGTG	NegCtrl	604	2219	1421	1508	3	5561	3173	3	887	390	0	1	2	2	5251	1	1147
1|CRko|sg_Non_Targeting_Human_CRko_09|Non_Targeting_Human_CRko	GTCGGTGATCCAACGTATCG	NegCtrl	703	954	3220	718	0	0	0	3	2	0	2	5588	0	0	1	0	1468
1|CRko|sg_Non_Targeting_Human_CRko_10|Non_Targeting_Human_CRko	GTCACTCGCAGACGCCTAAC	NegCtrl	2940	2956	8	7353	1	10802	2	0	8967	6	2	0	0	2	1	1374	1488
1|CRko|sg_Non_Targeting_Human_CRko_11|Non_Targeting_Human_CRko	GCGCTACGGAATCATACGTT	NegCtrl	798	772	4432	803	0	2	1	2439	1816	2	0	0	0	0	1	0	1356
1|CRko|sg_Non_Targeting_Human_CRko_12|Non_Targeting_Human_CRko	GAACTGCATCTTGTTGTAGT	NegCtrl	1280	2120	3613	790	53	1	5946	7	1	3	3	10812	3	2719	4558	5487	1290
1|CRko|sg_Non_Targeting_Human_CRko_13|Non_Targeting_Human_CRko	GGAACATAGGAGCACGTAGT	NegCtrl	2233	1602	3436	1524	2	1	1	2166	0	2	803	1	1873	2362	3655	14146	1384
1|CRko|sg_Non_Targeting_Human_CRko_14|Non_Targeting_Human_CRko	GTCATCATTATGGCGTAAGG	NegCtrl	1657	2334	3566	612	0	0	0	1	2	0	0	1	0	0	4778	3065	1204
1|CRko|sg_Non_Targeting_Human_CRko_15|Non_Targeting_Human_CRko	GGCGAAGTTCGACATGACAC	NegCtrl	1428	3620	910	1196	1	2	0	0	1666	3159	1	0	1	2	1	1541	1500
1|CRko|sg_Non_Targeting_Human_CRko_16|Non_Targeting_Human_CRko	GACTAATGGACCAAGTCAGT	NegCtrl	5085	3903	2876	3008	0	0	1	2248	0	0	0	0	0	1	2	1	1317
1|CRko|sg_Non_Targeting_Human_CRko_17|Non_Targeting_Human_CRko	GTCACTGTGGTCGAACATGT	NegCtrl	1903	1054	2950	3790	1	3	2	4019	1905	5138	1135	0	0	2525	7802	1	1397
1|CRko|sg_Non_Targeting_Human_CRko_18|Non_Targeting_Human_CRko	TACTAACGCCGCTCCTACAG	NegCtrl	77	508	1504	1584	2	2	2	1	1620	11257	2	0	0	4	0	5925	1423
1|CRko|sg_Non_Targeting_Human_CRko_19|Non_Targeting_Human_CRko	CGCGGAAATTTTACCGACGA	NegCtrl	1381	2703	3254	1656	3	1	6658	0	1	3	2	1	2536	1	0	6738	1411
1|CRko|sg_Non_Targeting_Human_CRko_20|Non_Targeting_Human_CRko	CGACTAACCGGAAACTTTTT	NegCtrl	2045	2208	1592	2279	3676	0	0	1	2	0	2132	1	1	1	1	0	1200
1|CRko|sg_Non_Targeting_Human_CRko_21|Non_Targeting_Human_CRko	CAGGAGTCGCCGATACGCGT	NegCtrl	823	4680	3	7	2	1	0	0	0	3	810	1	0	4419	0	1	1610
1|CRko|sg_Non_Targeting_Human_CRko_22|Non_Targeting_Human_CRko	GTGTCGGATTCCGCCGCTTA	NegCtrl	1972	1133	3396	1527	6157	1	1	3	2	0	1287	1	2	4640	0	0	1351
1|CRko|sg_Non_Targeting_Human_CRko_23|Non_Targeting_Human_CRko	CACGAACTCACACCGCGCGA	NegCtrl	1354	2717	1206	3	11	1	1	2	0	0	2105	10129	0	2726	1	0	1518
1|CRko|sg_Non_Targeting_Human_CRko_24|Non_Targeting_Human_CRko	CGCTAGTACGCTCCTCTATA	NegCtrl	243	3934	941	238	0	0	0	3249	1	1	0	0	0	0	0	0	1251
1|CRko|sg_Non_Targeting_Human_CRko_25|Non_Targeting_Human_CRko	GATGGCGCTTCAGTCGTCGG	NegCtrl	2025	1580	1291	2506	0	1	4	2	2403	0	2	0	6355	2966	9276	0	1603
1|CRko|sg_Non_Targeting_Human_CRko_26|Non_Targeting_Human_CRko	CGTCGCCATATGCCGGTGGC	NegCtrl	1875	2476	1803	335	3011	0	1	0	0	1	0	0	0	1	0	2937	1418
1|CRko|sg_Non_Targeting_Human_CRko_27|Non_Targeting_Human_CRko	CGGGCCTATAACACCATCGA	NegCtrl	2492	3826	4826	3376	2	2	1	2	1	3	1	0	2585	2	1	22957	1369
1|CRko|sg_Non_Targeting_Human_CRko_28|Non_Targeting_Human_CRko	CATTGTTGAGCGGGCGCGCT	NegCtrl	3935	3035	4477	1815	0	1	0	1	1	1	2143	1	1	0	15722	4240	1307
1|CRko|sg_Non_Targeting_Human_CRko_29|Non_Targeting_Human_CRko	CGCAAGGTGTCGGTAACCCT	NegCtrl	3246	5159	799	253	3549	2	0	973	1	1785	439	0	10249	8791	4871	7725	1382
1|CRko|sg_Non_Targeting_Human_CRko_30|Non_Targeting_Human_CRko	TCCTGGATACCGCGTGGTTA	NegCtrl	1648	1919	1578	806	2	1	1	4656	1	2	1	1	0	0	0	9636	1232
1|CRko|sg_Non_Targeting_Human_CRko_31|Non_Targeting_Human_CRko	GTACCATACCGCGTACCCTT	NegCtrl	3943	3095	2686	6262	0	0	2	0	1612	0	1	1	1	2435	1	19536	1095
1|CRko|sg_Non_Targeting_Human_CRko_32|Non_Targeting_Human_CRko	TGGTTCCGTAGGTCGGTATA	NegCtrl	1459	1455	3053	302	1	1	2	2	0	2	206	1	0	1	4710	7804	1318
1|CRko|sg_Non_Targeting_Human_CRko_33|Non_Targeting_Human_CRko	ATCTGTCCTAATTCGGATCG	NegCtrl	2137	3262	448	957	0	3	0	1	3	2258	1117	0	0	15278	3	0	1182
1|CRko|sg_Non_Targeting_Human_CRko_34|Non_Targeting_Human_CRko	TACCCTCCGGATACGGACTG	NegCtrl	1173	3453	2572	0	3477	1	4248	3	3243	2	1	0	2	2	1	0	1306
1|CRko|sg_Non_Targeting_Human_CRko_35|Non_Targeting_Human_CRko	AAGAGCGAATCGATTTCGTG	NegCtrl	2838	390	918	2902	0	8098	0	0	0	1	0	2	1	0	0	3731	1294
1|CRko|sg_Non_Targeting_Human_CRko_36|Non_Targeting_Human_CRko	ACGTCGTTTAGCACCCGGCT	NegCtrl	1945	2029	1086	1026	0	0	0	1	0	0	0	0	0	0	0	6245	1486
1|CRko|sg_Non_Targeting_Human_CRko_37|Non_Targeting_Human_CRko	GTACCCCTATGGCCGTTCTA	NegCtrl	2103	4619	6728	2237	1	0	0	2773	1	2	1623	2	1	2526	0	0	1293
1|CRko|sg_Non_Targeting_Human_CRko_38|Non_Targeting_Human_CRko	TACCCACGCGTATTCCATCT	NegCtrl	673	1457	1475	2712	0	0	0	2	3	1	0	0	0	1	1	1	1274
1|CRko|sg_Non_Targeting_Human_CRko_39|Non_Targeting_Human_CRko	GAACGCCGCTCAAGTTGATA	NegCtrl	2995	2031	5765	2705	3989	3	0	2596	2261	2	74	0	1	5303	1	0	1329
1|CRko|sg_Non_Targeting_Human_CRko_40|Non_Targeting_Human_CRko	AGGGCACCCGGTTCATACGC	NegCtrl	1392	2298	4994	1815	5757	2	0	2124	1824	0	721	0	2	3933	2	0	1418
1|CRko|sg_Non_Targeting_Human_CRko_41|Non_Targeting_Human_CRko	TGGCCACGAATTCCGCCGCC	NegCtrl	422	3837	3682	1939	3540	1	1	1	0	1	1667	1	0	2	1	12873	1637
1|CRko|sg_Non_Targeting_Human_CRko_42|Non_Targeting_Human_CRko	TTAGCCCTCGATTGGTTGCG	NegCtrl	2096	2431	2864	3075	0	0	0	2523	1	2	1565	0	1	2	1	1	1436
1|CRko|sg_Non_Targeting_Human_CRko_43|Non_Targeting_Human_CRko	TGCCGTGAAAAGACGCTGCG	NegCtrl	3950	2999	396	118	2	1	1	1249	1	1	0	1	1	7441	6711	0	1638
1|CRko|sg_Non_Targeting_Human_CRko_44|Non_Targeting_Human_CRko	ACGGTACATGCGCATGAGTC	NegCtrl	1850	2899	2922	2	0	0	2	3148	3	0	0	0	2	1	0	0	1331
1|CRko|sg_Non_Targeting_Human_CRko_45|Non_Targeting_Human_CRko	TAGAGATATCCGATCGTGGT	NegCtrl	1294	718	433	963	1	9791	0	1761	0	0	3	0	0	0	5092	1	1065
1|CRko|sg_Non_Targeting_Human_CRko_46|Non_Targeting_Human_CRko	GGGTGCCCACTAATAGCCGC	NegCtrl	1172	2747	7200	5240	0	0	1	2787	3	7	0	5240	0	2	18480	1869	1572
1|CRko|sg_Non_Targeting_Human_CRko_47|Non_Targeting_Human_CRko	GCGGTTCCGGGAGCACATTT	NegCtrl	2836	2869	3681	2497	1	0	1	2201	1	0	804	0	3838	1	2	0	1327
1|CRko|sg_Non_Targeting_Human_CRko_48|Non_Targeting_Human_CRko	CAGTGTCCGAGCGATATTTT	NegCtrl	1118	1297	4736	1776	0	1	3	2	3455	3832	0	0	2	2925	0	1	1305
1|CRko|sg_Non_Targeting_Human_CRko_49|Non_Targeting_Human_CRko	GCGGCGTCATCCACGCGTGC	NegCtrl	2246	2584	1959	5656	8428	1	0	3	4480	1130	3708	5975	3	1	13902	4	1621
1|CRko|sg_Non_Targeting_Human_CRko_50|Non_Targeting_Human_CRko	ACGCCTCCTCAAATTAGCTC	NegCtrl	2015	2885	4066	3259	1	0	463	1	2	2	1831	0	0	9718	1	3280	1245
1|CRko|sg_Non_Targeting_Human_CRko_51|Non_Targeting_Human_CRko	CCTACGCGGTAGGGAACTTT	NegCtrl	890	1669	1730	549	3	8616	1	0	2	1	1	2	1	1	2	0	1005
1|CRko|sg_Non_Targeting_Human_CRko_52|Non_Targeting_Human_CRko	TAATCATGCACATTCGGGAC	NegCtrl	401	2986	3084	664	0	0	1	1	0	0	0	0	1	0	0	0	1310
1|CRko|sg_Non_Targeting_Human_CRko_53|Non_Targeting_Human_CRko	CTTCCGTTATTCGGAAGTGA	NegCtrl	498	2379	1145	1269	1113	0	1	2294	6177	0	1	1	1	2	7228	1	1169
1|CRko|sg_Non_Targeting_Human_CRko_54|Non_Targeting_Human_CRko	GCAAAAACCCAACGCTATTC	NegCtrl	1000	2413	861	2304	2	0	1	3696	0	1	4	9413	0	2524	1389	841	1385
1|CRko|sg_Non_Targeting_Human_CRko_55|Non_Targeting_Human_CRko	ACAAAATGCCGTGCGTCAAT	NegCtrl	1864	2469	3328	2934	3344	3	2	868	2031	1	3226	0	2	1	1	0	1359
1|CRko|sg_Non_Targeting_Human_CRko_56|Non_Targeting_Human_CRko	CGGCACACCAATGCGTTCGT	NegCtrl	601	5412	4137	345	0	0	1	1	0	1	0	0	1	4845	0	0	1572
1|CRko|sg_Non_Targeting_Human_CRko_57|Non_Targeting_Human_CRko	ATCAGGCCTTGTCCGTGATT	NegCtrl	648	3754	2890	570	0	1	0	0	0	1	0	0	0	0	1	1	1249
1|CRko|sg_Non_Targeting_Human_CRko_58|Non_Targeting_Human_CRko	AACGTGCTGACGATGCGGGC	NegCtrl	180	5578	1695	343	2185	0	0	3	2	0	0	18728	1	2	7144	3	1523
1|CRko|sg_Non_Targeting_Human_CRko_59|Non_Targeting_Human_CRko	CGGCACCTGTTAGGCTATTC	NegCtrl	1477	924	1608	2	0	0	0	6	2	2811	0	0	0	0	0	9046	1414
1|CRko|sg_Non_Targeting_Human_CRko_60|Non_Targeting_Human_CRko	TCTCGTAGCCTAATGCGCCA	NegCtrl	3631	2205	2985	701	3	2	6865	3	3	4078	1	0	3313	3750	4	6713	1310
1|CRko|sg_Non_Targeting_Human_CRko_61|Non_Targeting_Human_CRko	GCCCTTCAATGCGTTCCGTA	NegCtrl	854	3894	6211	294	1	1	0	2	3	4	1090	1	2	6291	1	0	1427
1|CRko|sg_Non_Targeting_Human_CRko_62|Non_Targeting_Human_CRko	CTAATCACGACCTCACCCTA	NegCtrl	2482	3511	2028	347	5	1	1384	1	3413	3299	22	1	1	1884	1	1	1460
1|CRko|sg_Non_Targeting_Human_CRko_63|Non_Targeting_Human_CRko	TGTGCACAAGTCGCAACGAA	NegCtrl	1299	2400	3422	1007	2	1	0	1	3892	6336	733	0	0	2	1	2	1324
1|CRko|sg_Non_Targeting_Human_CRko_64|Non_Targeting_Human_CRko	CTTAGCTGACCGACAAGGTG	NegCtrl	5	2566	9443	2592	0	1	1	4	0	2	3	1	0	3891	2	2712	1474
1|CRko|sg_Non_Targeting_Human_CRko_65|Non_Targeting_Human_CRko	CCCTTCTGGCGGGCCAAACA	NegCtrl	293	698	622	2617	1	0	0	1	0	0	207	0	0	0	0	1731	1070
1|CRko|sg_Non_Targeting_Human_CRko_66|Non_Targeting_Human_CRko	CAGACGGTTGGTAAGGACGC	NegCtrl	1273	3503	3978	2609	5	2	3003	7	3079	11	1425	0	96050	3	7432	7014	1451
1|CRko|sg_Non_Targeting_Human_CRko_67|Non_Targeting_Human_CRko	CTCCCATTGATCTACGATGG	NegCtrl	1507	1573	2325	5399	4	2	2	5	1	6845	3966	0	1175	1	6106	1196	1362
1|CRko|sg_Non_Targeting_Human_CRko_68|Non_Targeting_Human_CRko	ATCACGTGATCGGATGGTTC	NegCtrl	3	2816	3381	844	1	0	1	1	0	0	0	0	0	0	0	1436	1077
1|CRko|sg_Non_Targeting_Human_CRko_69|Non_Targeting_Human_CRko	CAACGACGGGCCTAGTCTCA	NegCtrl	660	4176	4803	2278	1	1	2	2	1	3	2509	1	1	7168	0	2913	1455
1|CRko|sg_Non_Targeting_Human_CRko_70|Non_Targeting_Human_CRko	CGCCTCTCACGTGTAGGCTT	NegCtrl	1845	2872	1550	4937	4184	0	2	1	0	1	1705	1	0	2291	8292	0	1513
1|CRko|sg_Non_Targeting_Human_CRko_71|Non_Targeting_Human_CRko	CGTTGGGCATAGCGAACACT	NegCtrl	1282	4836	1088	1865	3	10540	1	0	2	1168	0	1	1	0	2	1	1189
1|CRko|sg_Non_Targeting_Human_CRko_72|Non_Targeting_Human_CRko	AGCATTTGCGCGGCAACTGT	NegCtrl	775	2897	776	4337	1	0	1	2	10	0	1227	5784	2	13491	1	0	1421
1|CRko|sg_Non_Targeting_Human_CRko_73|Non_Targeting_Human_CRko	GTCCTCATCCGGTCAGGCTG	NegCtrl	1841	4663	3134	4935	2	5679	1	2733	3	4	307	1	0	13893	0	5946	1407
1|CRko|sg_Non_Targeting_Human_CRko_74|Non_Targeting_Human_CRko	CCCAGGTGTATAATGAAACG	NegCtrl	748	740	1839	746	1	0	2671	1	0	0	0	1	1	0	13202	1061	1285
1|CRko|sg_Non_Targeting_Human_CRko_75|Non_Targeting_Human_CRko	TTTGGGTTTATCCGCCCCCA	NegCtrl	429	707	3744	1447	0	6824	1	0	0	0	1186	0	0	0	0	0	1213
1|CRko|sg_Non_Targeting_Human_CRko_76|Non_Targeting_Human_CRko	CTCGGGACTAACGTGAGAGC	NegCtrl	11	3313	2656	2814	2	0	2	2	2019	3	1184	17818	5171	1	2	3057	1360
1|CRko|sg_Non_Targeting_Human_CRko_77|Non_Targeting_Human_CRko	CCCCGTAGCTCATTAGTCTG	NegCtrl	2862	2142	3	3147	3	0	3	3213	0	4	1	9552	4312	2	12927	0	1286
1|CRko|sg_Non_Targeting_Human_CRko_78|Non_Targeting_Human_CRko	GGCTGGTTGACGACTCCTGA	NegCtrl	49	3726	667	907	3	2	10855	4242	0	2374	796	1	3	1	0	4654	1333
1|CRko|sg_Non_Targeting_Human_CRko_79|Non_Targeting_Human_CRko	ATGCTGCAGCTTTACGATCA	NegCtrl	998	1257	1734	1320	2	2	0	3483	0	2	1213	0	1	0	3910	1	1153
1|CRko|sg_Non_Targeting_Human_CRko_80|Non_Targeting_Human_CRko	CCTACTCCCGTGTGTTATCC	NegCtrl	678	2985	3767	1557	0	2	0	2	1	0	1	0	0	4221	5055	0	1342
1|CRko|sg_Non_Targeting_Human_CRko_81|Non_Targeting_Human_CRko	CGCACGACCATTGCTGCTGC	NegCtrl	1707	5605	5333	996	2	4946	2	2661	2466	2089	592	0	2	2	1	3118	1631
1|CRko|sg_Non_Targeting_Human_CRko_82|Non_Targeting_Human_CRko	CGATGCCCGTCTATGGCCCG	NegCtrl	3720	2748	3924	1550	0	0	1	0	1	1104	635	1	1	0	9840	1598	1585
1|CRko|sg_Non_Targeting_Human_CRko_83|Non_Targeting_Human_CRko	GGTCCGCGCACAAGAGCAGG	NegCtrl	3431	3036	3917	1464	0	1	1	5014	4013	2	3	0	5817	5373	4064	2	1599
1|CRko|sg_Non_Targeting_Human_CRko_84|Non_Targeting_Human_CRko	TACGGATCACCAAATCTTAG	NegCtrl	589	729	3	2292	2231	0	1	2	1990	1	2	1	0	4939	1	2681	1255
1|CRko|sg_Non_Targeting_Human_CRko_85|Non_Targeting_Human_CRko	CCCGCTAACAGCCTAGATCA	NegCtrl	3532	3650	2873	3665	2	0	0	1	2070	4	1	0	0	2722	1	2859	1352
1|CRko|sg_Non_Targeting_Human_CRko_86|Non_Targeting_Human_CRko	CTATAACCGAATCAAAGGGT	NegCtrl	482	3186	4859	1114	0	0	0	2	0	0	55	0	1	1	0	0	1171
1|CRko|sg_Non_Targeting_Human_CRko_87|Non_Targeting_Human_CRko	GGAGATGCGGCCTTCTCAAA	NegCtrl	1102	3260	7358	912	1	0	4578	1	1	1343	1	2	0	0	0	0	1396
2|CRko|sg_hALAS1-INTRON_01|ALAS1-INTRON	GGTGGACATCCACCCCTAAG	NegCtrl	600	1619	4	3	5	22491	3	2348	1559	2947	0	12361	2	4882	4914	4	1186
2|CRko|sg_hALAS1-INTRON_02|ALAS1-INTRON	GCGCCTCGGACCTGGACTTG	NegCtrl	1540	2305	2808	635	231	2	0	1	3825	3886	1585	1	0	8578	7452	3634	1486
2|CRko|sg_hC1orf43-INTRON_01|C1orf43-INTRON	AGTTGGGCAGATAACACTTG	NegCtrl	688	1401	1496	3	3309	0	2	4855	3	3	2848	1	0	1	1	2073	1219
2|CRko|sg_hDMD-INTRON_01|DMD-INTRON	AGTACGGAGCTATCACGTAG	NegCtrl	1523	1827	1152	7762	3594	1	1	1	4	1	806	0	3	0	0	1	1340
2|CRko|sg_hGPI-INTRON_01|GPI-INTRON	GCCTGTGCTAGAAATGTGGG	NegCtrl	2009	2807	1191	5303	2	3	4382	960	3529	0	854	5897	1	1	8586	3	1380
2|CRko|sg_hGPI-INTRON_02|GPI-INTRON	GGATCTGTCAGTACCACCTG	NegCtrl	1608	1806	2939	908	2	1	1	3	1	4	1516	10908	0	9546	0	0	1417
2|CRko|sg_hGPI-INTRON_03|GPI-INTRON	TGGGCCACTGTTCAAGCAGG	NegCtrl	3604	5005	2814	16	1	0	0	1839	2	2	623	0	1	1	14593	1	1478
2|CRko|sg_hRAB7A-INTRON_01|RAB7A-INTRON	GGTTGTGGACAGAACTCTTG	NegCtrl	2189	4357	5028	1940	3	2	1	3482	0	3	883	0	2	0	6989	1	1369
2|CRko|sg_hREEP5-INTRON_01|REEP5-INTRON	GTATGAAGCACAAGCCAATG	NegCtrl	1152	1632	4370	205	4	12373	1	4	0	4	873	1	0	2	14546	1	1440
2|CRko|sg_hUBC-INTRON_01|UBC-INTRON	GGTTTTGAACTATGCGCTCG	NegCtrl	2255	2767	4451	3	2	6156	0	0	0	0	0	1	19658	2	1	6867	1259
2|CRko|sg_hUBC-INTRON_02|UBC-INTRON	GGCAAGAACCCAAGGTCTTG	NegCtrl	3657	1624	1218	4202	3325	1	0	1	0	4	2	0	0	2	9365	7453	1510
2|CRko|sg_hVCP-INTRON_01|VCP-INTRON	CGGGATGGTAGGCAGAATGG	NegCtrl	2256	2017	5700	3628	1871	0	0	2	2164	2	0	0	0	0	4646	1	1424
2|CRko|sg_hVCP-INTRON_02|VCP-INTRON	GCAGTTCTGGACACTCTTTG	NegCtrl	1666	2388	4859	1611	5674	1	0	0	0	1	0	0	0	3012	0	1	1262
3|CRko|sg_hDAD1_01|DAD1	CGGGCTTCATCTCTTGTGTG	DAD1	733	126	513	466	2	2	8197	2920	1	2	2	3	0	1	2	2	1371
3|CRko|sg_hDAD1_02|DAD1	GCTGTATATACTGCTGACCG	DAD1	1	2	1118	0	0	0	1	1	1	0	1460	8937	0	0	0	0	1374
3|CRko|sg_hDAD1_03|DAD1	TGAAGGGGAAGGTCCCCACG	DAD1	616	1884	1015	446	0	0	0	0	1787	1	0	0	0	0	0	0	1388
3|CRko|sg_hDAD1_04|DAD1	TTATAGAACCATTACCCGCT	DAD1	2	1752	1449	4599	0	0	0	0	0	0	0	0	0	0	0	0	1123
3|CRko|sg_hDAD1_05|DAD1	GTGGGTTGATCTGTATTCTC	DAD1	1	1114	1205	0	0	0	0	0	0	0	0	0	0	0	0	0	1243
3|CRko|sg_hDAD1_06|DAD1	GTGGGGAGTTTCATCCTAGC	DAD1	0	1	2994	391	0	0	1	1	0	0	888	0	0	0	0	0	1386
3|CRko|sg_hDAD1_07|DAD1	GTAACCGAACTGCAGCGCCC	DAD1	3	693	1	2	3226	2	0	0	0	0	0	0	0	2	7206	1	1493
3|CRko|sg_hDAD1_08|DAD1	CTGCTGTATATACTGCTGAC	DAD1	1339	1	486	0	0	1	0	0	0	8244	0	0	1	3	0	2	1324
3|CRko|sg_hDAD1_09|DAD1	CAGAACAAAGCGGATTTCCA	DAD1	261	1329	1478	572	0	0	0	1	0	0	0	0	0	0	0	0	1323
3|CRko|sg_hDAD1_10|DAD1	GATCAACCCACAGAACAAAG	DAD1	1012	921	5	0	0	0	0	4	1	2	1857	0	0	1	1	2	1408
3|CRko|sg_hMAK16_01|MAK16	CATTTGTGTCGAATGAAACG	MAK16	773	147	1	1583	1	0	0	0	0	0	1	0	0	0	0	0	1243
3|CRko|sg_hMAK16_02|MAK16	CTTTGTCGAAGGCATGAATG	MAK16	0	504	354	597	6694	1	1	1	2	1	1	0	4873	0	1326	0	1377
3|CRko|sg_hMAK16_03|MAK16	TAATCGGTCATCCTGTCCCC	MAK16	782	824	0	1122	0	0	0	0	0	0	948	0	0	1	0	0	1306
3|CRko|sg_hMAK16_04|MAK16	TATGAAGGTTATAGAACGAG	MAK16	476	1254	1452	2019	1	0	0	2	1	0	1636	0	0	0	6208	0	1064
3|CRko|sg_hMAK16_05|MAK16	ACCGATTACACAGTCCAGTC	MAK16	334	527	3120	1149	1	0	0	0	0	0	0	0	0	0	0	0	1390
3|CRko|sg_hMAK16_06|MAK16	TCTAATTCGAATTAGGTATT	MAK16	694	658	2159	226	1	0	1	2077	1	1783	0	10876	0	0	0	0	1021
3|CRko|sg_hMAK16_07|MAK16	GAGTAAGAAGGTGGAGCGTA	MAK16	1144	1314	2178	1	3491	0	0	1	2	0	674	0	0	0	1	0	1287
3|CRko|sg_hMAK16_08|MAK16	GCTGGACAATGCCATTGAGA	MAK16	1	1120	774	351	1	0	1	2245	0	1	1282	0	0	3039	1	0	1435
3|CRko|sg_hMAK16_09|MAK16	ACAGTGCTACTTGTATATGA	MAK16	1	126	1	0	2123	0	0	0	1	0	0	0	0	0	0	0	1147
3|CRko|sg_hMAK16_10|MAK16	TGAGTAAGAAGGTGGAGCGT	MAK16	0	155	4785	712	1	0	0	0	1	0	0	1	1	0	0	0	1318
3|CRko|sg_hPOLR3H_01|POLR3H	ATGCAGGTCGTGTACAACGT	POLR3H	983	34	0	1	0	0	0	0	0	0	603	0	0	0	1	0	1327
3|CRko|sg_hPOLR3H_02|POLR3H	GCCATCCCCAGGGAATACAT	POLR3H	0	0	3	992	0	0	0	0	0	0	1736	0	0	0	0	0	1369
3|CRko|sg_hPOLR3H_03|POLR3H	GCTCAACGACTCCATTGCCG	POLR3H	684	590	19	0	0	1	0	0	0	0	0	0	0	0	0	0	1475
3|CRko|sg_hPOLR3H_04|POLR3H	TCCTCTCAAACTGCCAAGGG	POLR3H	845	303	902	1398	1	3	12370	3	2371	5	2	2	1	4	4	2	1101
3|CRko|sg_hPOLR3H_05|POLR3H	AACCCTTGGAGGATACAACT	POLR3H	1252	749	445	813	3824	0	1	0	0	1	1191	0	0	0	0	0	1216
3|CRko|sg_hPOLR3H_06|POLR3H	AGGATGCCTATGTATTCCCT	POLR3H	1436	434	561	0	778	6739	0	1948	2	0	1521	0	0	0	0	0	1362
3|CRko|sg_hPOLR3H_07|POLR3H	ACACCGTCCGGATCCCCCCT	POLR3H	164	532	55	64	0	0	0	0	0	0	0	0	0	0	0	0	1607
3|CRko|sg_hPOLR3H_08|POLR3H	TCCTAGATGAGATTCTCATT	POLR3H	5	503	885	1	0	0	0	0	0	0	481	0	1	0	0	4531	1020
3|CRko|sg_hPOLR3H_09|POLR3H	GTGGGTGTGGGAGTACGAGA	POLR3H	522	921	1878	3	0	0	0	0	0	0	0	0	0	0	0	0	1234
3|CRko|sg_hPOLR3H_10|POLR3H	TGCAGCCCAGAAGGAGTGCA	POLR3H	1146	459	1598	0	8630	4	2	3	2	3	2186	0	12856	5854	4	2	1512
3|CRko|sg_hRPL10_01|RPL10	ACTACTTACCAGGGACACCT	RPL10	0	8	1	580	3191	0	479	0	1	1	0	1	0	0	0	0	1330
3|CRko|sg_hRPL10_02|RPL10	GACACCATGTGGCCACAAAG	RPL10	581	339	328	1297	0	0	0	0	0	0	0	0	1	2756	0	0	1444
3|CRko|sg_hRPL10_03|RPL10	TATGAGCAGCTGTCCTCTGA	RPL10	1	23	989	0	0	0	0	0	2	0	0	1	1460	2812	2	0	1308
3|CRko|sg_hRPL10_04|RPL10	TCTTGTTGATGCGGATGACG	RPL10	369	1	1731	0	0	0	0	0	0	0	0	0	0	0	0	0	1345
3|CRko|sg_hRPL10_05|RPL10	GGTGGAGCCGCACCCGGATA	RPL10	1	480	651	0	1	6495	0	1	2	2	759	0	0	0	1	0	997
3|CRko|sg_hRPL10_06|RPL10	GGGGCGGAAAAAGGCAAAAG	RPL10	0	0	1407	52	1	1	11736	4	0	3	1	1	2	1	1	3755	1395
3|CRko|sg_hRPL10_07|RPL10	GCAGCTGTCCTCTGAAGGTA	RPL10	2	1905	1873	910	0	0	1	0	0	0	1383	0	0	0	1	0	1343
3|CRko|sg_hRPL10_08|RPL10	CAGCACTACATACCTTCTGG	RPL10	1963	218	2	0	0	0	0	5440	0	1	0	0	0	0	0	0	1481
3|CRko|sg_hRPL10_09|RPL10	ACGGATTCAAGACTCACCAA	RPL10	423	457	641	2	72	2	4547	0	2	1	520	0	0	0	0	1	1361
3|CRko|sg_hRPL10_10|RPL10	CGGATTCAAGACTCACCAAC	RPL10	587	283	742	328	0	0	0	1	1779	1	0	0	2326	0	5769	1	1297
3|CRko|sg_hRPL13_01|RPL13	CACCTGCGGATCTTACGGGC	RPL13	768	785	2	790	0	0	0	0	0	1624	0	0	0	1	0	0	1380
3|CRko|sg_hRPL13_02|RPL13	GCCGGATGGGACCCGACGCG	RPL13	1454	1	1133	0	0	0	0	0	0	0	0	0	0	0	0	0	1683
3|CRko|sg_hRPL13_03|RPL13	GTTGGCCTGCAGGGACTCCG	RPL13	1215	806	4917	3	3	2	6919	4	0	2	0	0	0	1	0	0	1403
3|CRko|sg_hRPL13_04|RPL13	TACCACACGAAGGTGCGCGC	RPL13	813	1	1599	2	0	0	0	1	0	0	1279	0	0	0	0	0	1434
3|CRko|sg_hRPL13_05|RPL13	AGCCGGCCCGTAAGATCCGC	RPL13	0	712	1218	3	3495	0	0	1	0	0	702	0	2	0	0	0	1500
3|CRko|sg_hRPL13_06|RPL13	TACTCACCCTGAGCTCCTCC	RPL13	0	224	0	376	0	0	0	0	0	0	0	0	0	0	1	0	1483
3|CRko|sg_hRPL13_07|RPL13	ACCGTGGGGCAGCGCACGAT	RPL13	837	1684	1526	1188	0	0	1953	0	1	2913	1	0	1	1826	0	1	1591
3|CRko|sg_hRPL13_08|RPL13	AAGAAGGTGGCCCGGACCAT	RPL13	1584	352	600	1354	1	0	1	1	1	0	840	0	0	0	0	0	1516
3|CRko|sg_hRPL13_09|RPL13	CAAGTCCACGGAGTCCCTGC	RPL13	410	1976	1841	745	1	0	0	1	0	1	1815	0	0	0	0	0	1555
3|CRko|sg_hRPL13_10|RPL13	GCTTCTCTCCACCAGACGTA	RPL13	1386	430	2304	0	3161	1	0	1	1	1	2175	0	0	0	1	2858	1289
3|CRko|sg_hRPL19_01|RPL19	GAATGCCAGAGAAGGTCACA	RPL19	1	0	1	70	0	0	0	0	1	1	1348	0	0	0	0	4150	1438
3|CRko|sg_hRPL19_02|RPL19	GCTTCCGGATCTGCTGACCT	RPL19	0	416	112	1	0	9791	1	1	2	2	1	2	0	0	2	1	1430
3|CRko|sg_hRPL19_03|RPL19	TGTACCCTTCCGCTTACCTG	RPL19	2	0	696	0	0	0	0	0	0	0	0	0	0	0	0	0	1387
3|CRko|sg_hRPL19_04|RPL19	GTACTCACGGGAGTTGGCAT	RPL19	238	2	1935	0	5645	0	1	1	2577	2	1	0	0	0	1	2	1406
3|CRko|sg_hRPL19_05|RPL19	CAAGAGGGTGTGCTTACATG	RPL19	1	2	2471	1	0	1	0	0	0	0	0	0	1	0	0	0	1360
3|CRko|sg_hRPL19_06|RPL19	TCCCAGGTACTCACGGGAGT	RPL19	1	392	0	0	0	0	0	0	0	0	0	0	0	0	0	0	1285
3|CRko|sg_hRPL19_07|RPL19	TCTGTGTGTCTAGTATGCTC	RPL19	1	1	1	439	0	0	0	0	6	0	0	0	0	0	0	0	1128
3|CRko|sg_hRPL19_08|RPL19	GCGGCCGCAGCCATGAGGTG	RPL19	1	1	1	0	0	0	0	2416	0	0	0	0	0	2	0	0	1644
3|CRko|sg_hRPL19_09|RPL19	ACCAGCTCGCCCTCACCTCA	RPL19	85	521	1775	0	0	0	0	0	1	0	2732	0	6453	0	0	0	1538
3|CRko|sg_hRPL19_10|RPL19	TCCGGAAGCTCATCAAAGAT	RPL19	616	0	1384	41	0	0	0	0	0	0	669	0	0	0	0	0	1171
3|CRko|sg_hRPL37_01|RPL37	AGGCCTTAGAGCCACAGCGG	RPL37	11	127	1	0	6022	1	0	1	0	1	0	0	0	0	0	0	1589
3|CRko|sg_hRPL37_02|RPL37	CCTCATTCGACCAGTTCCGG	RPL37	793	553	2664	6	1	0	0	0	0	1	0	0	0	0	0	0	1497
3|CRko|sg_hRPL37_03|RPL37	GGTCGACTTCTGAAGGTGGT	RPL37	736	1220	1655	839	0	0	0	1	0	1	1623	0	0	0	0	0	1391
3|CRko|sg_hRPL37_04|RPL37	TTTAGATAACTGGAGTGCCA	RPL37	556	518	935	0	0	0	0	0	1	0	0	0	0	0	0	0	1162
3|CRko|sg_hRPL37_05|RPL37	ACAAACTGTACCTGAATCTG	RPL37	605	1059	580	4386	0	0	0	4097	0	0	1543	0	0	0	0	1	1330
3|CRko|sg_hRPL37_06|RPL37	AAATTGTATACCGCAGATTC	RPL37	1	575	1471	0	5860	0	5047	1	1	0	690	0	3	0	3	0	1275
3|CRko|sg_hRPL37_07|RPL37	TGCAGGCATGGATTCCGTGA	RPL37	675	362	1335	2521	2113	0	0	1811	1	3	2405	0	0	3144	0	0	1328
3|CRko|sg_hRPL37_08|RPL37	CCACCGGAACTGGTCGAATG	RPL37	627	0	1	0	0	0	0	0	0	0	0	0	0	0	0	0	1510
3|CRko|sg_hRPL37_09|RPL37	GTGCCTCATTCGACCAGTTC	RPL37	87	1165	1092	1315	243	0	0	0	0	0	0	0	0	0	0	0	1459
3|CRko|sg_hRPL37_10|RPL37	ACGAAGGGAACGTCATCGTT	RPL37	1744	1719	913	1	12269	1	1490	2	0	1	1075	0	8735	1	1	1	1347
3|CRko|sg_hRPL8_01|RPL8	CAGCACACGATTGTACCCTC	RPL8	793	167	1	0	0	0	0	0	0	0	0	0	0	0	0	1321	1526
3|CRko|sg_hRPL8_02|RPL8	CAGGACATCATCCACGACCC	RPL8	282	625	1479	1	0	0	365	0	2	0	0	0	0	3871	0	3844	1458
3|CRko|sg_hRPL8_03|RPL8	GCCCGTGTGAATGCCCTCGG	RPL8	1051	1	2783	1383	4739	0	2	1	1	0	0	0	0	0	0	0	1572
3|CRko|sg_hRPL8_04|RPL8	GCGCCGTGGATTTCGCTGAG	RPL8	0	951	2743	0	0	0	0	0	0	0	683	0	0	0	0	1207	1449
3|CRko|sg_hRPL8_05|RPL8	GTATCGGTTTAAGAAGCGGA	RPL8	56	1069	235	419	0	0	0	0	0	0	0	0	0	0	0	0	1150
3|CRko|sg_hRPL8_06|RPL8	GCGCACGTGAAGCACCGTAA	RPL8	437	563	615	3	0	0	0	0	0	0	0	0	0	0	0	0	1498
3|CRko|sg_hRPL8_07|RPL8	AGCCGGAGGGCAGCTTCACA	RPL8	2740	2524	2953	5	1	2	0	2	1	1	786	0	1	10199	7738	0	1460
3|CRko|sg_hRPL8_08|RPL8	CTGATCCCCTACAGGTGTGG	RPL8	655	1	1	842	4732	0	0	2	0	2	3	0	0	1	0	0	1458
3|CRko|sg_hRPL8_09|RPL8	CTTGCAGCCCAGCTCAACAT	RPL8	792	2167	2791	1807	1	0	0	3	0	1	0	0	0	3738	1	0	1377
3|CRko|sg_hRPL8_10|RPL8	GAGCGGCACGGCTACATCAA	RPL8	1	46	995	4336	0	1	0	0	0	1	808	0	0	0	0	0	1501
3|CRko|sg_hRPS18_01|RPS18	AAAGGATGGAAAATACAGCC	RPS18	1	1296	1084	3666	0	1	0	2738	0	1	1	9109	0	0	0	0	1332
3|CRko|sg_hRPS18_02|RPS18	AGACATTGACCTCACCAAGA	RPS18	1070	1113	1017	0	0	0	0	3452	1	0	0	0	0	0	0	1	1310
3|CRko|sg_hRPS18_03|RPS18	CCTCACTTCATTCAGGGTGT	RPS18	1	165	2	4	0	0	0	0	0	1	0	0	0	0	0	5390	1173
3|CRko|sg_hRPS18_04|RPS18	TCAACACCAACATCGATGGG	RPS18	0	0	1	687	2	4675	0	2	2	0	1096	0	1	0	0	0	1373
3|CRko|sg_hRPS18_05|RPS18	TGGTGATCACACGTTCCACC	RPS18	4	1057	1	90	0	0	0	0	2148	0	0	1	2	3206	0	0	1392
3|CRko|sg_hRPS18_06|RPS18	CAGACATTGACCTCACCAAG	RPS18	289	671	4	979	0	0	0	0	0	0	2	1	0	0	0	0	1342
3|CRko|sg_hRPS18_07|RPS18	TTTCCGCCGCCCATCGATGT	RPS18	281	990	1261	26	0	0	0	0	0	0	0	0	0	0	0	0	1440
3|CRko|sg_hRPS18_08|RPS18	TGAATCCAGGTCCTAGCCAA	RPS18	818	0	3681	3	0	0	0	0	0	0	0	0	0	4283	0	0	1259
3|CRko|sg_hRPS18_09|RPS18	GAAGTGACGCAGCCCTCTAT	RPS18	812	1041	3617	4	6347	0	0	0	2	784	915	1	1	1	1	0	1450
3|CRko|sg_hRPS18_10|RPS18	GAGGGCTGCGTCACTTCTGG	RPS18	460	555	1949	869	0	1	1433	1	0	0	0	0	0	0	1	0	1560
3|CRko|sg_hRPS24_01|RPS24	TACAAAGATGACATCCGGTG	RPS24	943	180	2389	2	1	6976	0	3	2	1	186	1	1	8570	2	0	1374
3|CRko|sg_hRPS24_02|RPS24	TAGGCACTGTCGCCTTCCCG	RPS24	273	1	3	977	0	0	0	0	1933	0	0	0	0	0	0	0	1598
3|CRko|sg_hRPS24_03|RPS24	TGACCAACCGACTACTTCAG	RPS24	618	0	2753	1	2641	1	0	0	1	0	679	1	0	0	0	0	1426
3|CRko|sg_hRPS24_04|RPS24	TGGTCATGAACTTTCTAGTG	RPS24	436	572	2	2612	86	0	0	1	3245	0	332	0	0	0	0	1197	1222
3|CRko|sg_hRPS24_05|RPS24	TTAGGCACTGTCGCCTTCCC	RPS24	69	683	442	951	0	0	0	0	0	422	0	0	0	0	0	2968	1397
3|CRko|sg_hRPS24_06|RPS24	AAACATAGACTTGCAAGAGT	RPS24	1080	999	3093	1	1	0	0	0	0	1	986	0	1	0	0	0	1224
3|CRko|sg_hRPS24_07|RPS24	ACAGAATGAAGAAAGTCAGG	RPS24	1337	592	2007	3068	2799	1	0	0	0	0	1	0	0	3808	1	0	1259
3|CRko|sg_hRPS24_08|RPS24	AGTGCCTAAGACAGAAATTC	RPS24	2	68	611	1	1	0	0	0	1	1	0	0	0	0	3197	0	1207
3|CRko|sg_hRPS24_09|RPS24	GTCATTGATGTCCTTCACCC	RPS24	2	0	0	3	1	1	0	2	0	0	0	1	3233	0	8718	0	1326
3|CRko|sg_hRPS24_10|RPS24	CCCAGGGAGACTCACCATGA	RPS24	1	3	1435	4287	2	0	1	0	3815	1	0	0	0	0	1	1	1468
4|CRko|sg_hAAMP_01|AAMP	AAGATGACAAAGCCTTCGTA	AAMP	570	1497	858	3	3324	0	0	2	1	1	1	1	0	0	0	0	1377
4|CRko|sg_hAAMP_02|AAMP	AGGTGACCTCGCTATCGTCG	AAMP	1749	1759	2	1779	1	1	0	4	1	11176	950	0	9	0	1	3792	1467
4|CRko|sg_hAAMP_03|AAMP	TGAGTGGCCTCTTGAAAGTG	AAMP	463	663	220	0	0	0	2	3166	0	1	1217	0	0	0	0	1	1212
4|CRko|sg_hAAMP_04|AAMP	TGGATGTGGAAAGTCCCGAA	AAMP	1493	2684	3187	639	2	0	1	3	1	0	0	0	0	0	5812	1	1299
4|CRko|sg_hAAMP_05|AAMP	ATCGCTGAGCCGCCATACGA	AAMP	548	1186	3	303	1	0	2	4269	0	0	1675	0	1	1	2	1	1659
4|CRko|sg_hAAMP_06|AAMP	AAGGTGACCTCGCTATCGTC	AAMP	688	937	3824	0	1	0	0	1	0	2	3	0	34756	0	0	0	1349
4|CRko|sg_hAAMP_07|AAMP	GCTCTGATGATCTTACCTCC	AAMP	494	260	3	1474	7542	0	0	1201	0	2	0	1	0	0	0	0	1271
4|CRko|sg_hAAMP_08|AAMP	GGGAGGTGCTCTCACCATCA	AAMP	439	260	955	4304	0	1	1	3886	1	2	1	0	0	4482	0	0	1416
4|CRko|sg_hAAMP_09|AAMP	TGGCCACTAGAGTGGAGTCA	AAMP	983	20	1621	2627	0	0	0	0	1	0	2544	0	0	0	0	1	1270
4|CRko|sg_hAAMP_10|AAMP	GAGGTGGTAGAACTTGATCC	AAMP	689	1844	1	899	0	0	0	0	1	0	788	1	2	3138	1	1	1326
4|CRko|sg_hABCB9_01|ABCB9	GCCCCAGACGTAGTACATGT	ABCB9	2135	1242	2423	73	1	0	0	0	0	1	702	0	3519	1	1	3878	1319
4|CRko|sg_hABCB9_02|ABCB9	TGGACACCATCATGATGATG	ABCB9	325	2452	4985	803	3	0	2424	7376	1	484	2	0	1	1	9481	2	1333
4|CRko|sg_hABCB9_03|ABCB9	TGTCCTGGGAGATTGTATGG	ABCB9	2759	2059	3275	53	7039	0	0	2	2	2	880	0	0	8026	4	0	1241
4|CRko|sg_hABCB9_04|ABCB9	TTTGCCGCAGGTATTCGGGG	ABCB9	1890	3290	5424	6773	12	0	0	0	1	0	0	0	0	0	0	0	1362
4|CRko|sg_hABCB9_05|ABCB9	AATGTACGTCCACACGAACA	ABCB9	2	2430	2765	4742	7	0	0	0	0	0	0	0	0	0	0	0	1271
4|CRko|sg_hABCB9_06|ABCB9	CATCTACGGCAAGTACTACA	ABCB9	1642	2137	2052	666	1	1	1	3	0	2598	5499	2	0	4146	0	0	1345
4|CRko|sg_hABCB9_07|ABCB9	CAGCCGACCATGGTGCACGA	ABCB9	1307	1901	2475	1046	3	3	1	2	5120	1	1	0	1	0	7678	1753	1670
4|CRko|sg_hABCB9_08|ABCB9	TCGAAGGCGAATGTTCAGTC	ABCB9	1	2715	1263	5370	0	0	0	0	0	0	0	0	0	2098	0	0	1340
4|CRko|sg_hABCB9_09|ABCB9	ATGGCGCGGCCCGTGTAGTA	ABCB9	1273	4130	4589	1814	0	1	1	2	1	3	1240	1	0	3894	6603	0	1390
4|CRko|sg_hABCB9_10|ABCB9	TGGCCAAGAACAGTGCGCTG	ABCB9	1686	1526	1577	5786	0	2560	0	1	1	3	2	0	2	3518	310	1	1561
4|CRko|sg_hABCC2_01|ABCC2	CAGAATTCATCACAAACGCA	ABCC2	1124	1620	5087	1053	0	1	4	1	3	3	724	10288	0	0	2	0	1274
4|CRko|sg_hABCC2_02|ABCC2	CAGGGTATAAATCTTAGTGG	ABCC2	635	823	1839	1318	0	2	0	0	0	1	0	0	0	2346	0	1485	1166
4|CRko|sg_hABCC2_03|ABCC2	CATTATGGCAGGCCAACTTG	ABCC2	392	1943	536	0	0	11083	5286	1870	3	3	2	1	2	3304	1	0	1397
4|CRko|sg_hABCC2_04|ABCC2	GATTGGTATATCGAACAGCA	ABCC2	1206	1397	5329	535	5256	3	1	2	2207	1	0	0	0	9136	1	5521	1255
4|CRko|sg_hABCC2_05|ABCC2	AAAAGTACGGACAGCTATCA	ABCC2	2745	3350	2738	128	0	0	0	1	0	0	893	0	0	0	4768	4500	1283
4|CRko|sg_hABCC2_06|ABCC2	AGGGAAAGTTACCAGGACAA	ABCC2	882	1421	1117	2182	1	2	1	1571	2374	3581	517	0	2	1	3533	2	1340
4|CRko|sg_hABCC2_07|ABCC2	AAAGAGGTACCAGCAAGTAC	ABCC2	1488	1721	2336	500	0	1	0	1	1	0	0	0	0	0	0	0	1316
4|CRko|sg_hABCC2_08|ABCC2	TGTGTCTCCCTAGTCCATGA	ABCC2	835	524	498	142	3	0	0	4571	0	1	0	0	11890	0	0	0	1189
4|CRko|sg_hABCC2_09|ABCC2	TTACCTACAGCTGGTATGAC	ABCC2	2297	1513	2	1144	0	0	0	0	1	0	1	0	1	0	0	0	1206
4|CRko|sg_hABCC2_10|ABCC2	GAGCGGCTAGAGAAGTACTT	ABCC2	789	1868	1256	662	0	0	0	2259	4439	2	783	10306	2	0	1	1	1314
4|CRko|sg_hABCE1_01|ABCE1	AGTTGTCCTGTAGTTCGAAT	ABCE1	498	2	1464	1	0	0	0	2	1	813	0	1	0	0	0	0	1144
4|CRko|sg_hABCE1_02|ABCE1	CAATTGATAAGGCGCCAAAG	ABCE1	665	481	0	1	1720	0	0	0	0	0	671	0	0	0	0	1	835
4|CRko|sg_hABCE1_03|ABCE1	CCAAAACTTCACCTGGACGA	ABCE1	0	830	1	104	1	0	0	3558	1	0	731	0	2	422	0	0	1311
4|CRko|sg_hABCE1_04|ABCE1	TTTCAGATATATCATTGTGG	ABCE1	719	710	1248	1118	1	0	2830	844	0	0	0	0	2	0	5480	0	1025
4|CRko|sg_hABCE1_05|ABCE1	TTGACATCTAGGTAACTAGA	ABCE1	0	1	2098	3	0	0	0	2446	0	0	0	0	0	0	0	0	1138
4|CRko|sg_hABCE1_06|ABCE1	TGGTAGATTGACAATTGATA	ABCE1	0	713	691	0	0	0	0	0	0	0	2	0	0	0	0	0	612
4|CRko|sg_hABCE1_07|ABCE1	ATATGTAGACCAGATTCCTA	ABCE1	480	0	590	1	1	0	1	0	0	1	0	0	0	0	0	0	1117
4|CRko|sg_hABCE1_08|ABCE1	ACCAGGAAAATTATGCATAG	ABCE1	247	1447	4265	934	1	0	0	2657	0	1	2946	1	0	5174	5855	0	1191
4|CRko|sg_hABCE1_09|ABCE1	AGGCATAGTGACAACTCCAT	ABCE1	662	680	2118	897	0	0	0	0	0	0	0	0	0	0	1	0	1216
4|CRko|sg_hABCE1_10|ABCE1	AGGTTGCCTATCCCTCGTCC	ABCE1	1	0	2083	3	1	0	0	4925	1	1	2282	0	0	0	0	0	1385
4|CRko|sg_hABHD4_01|ABHD4	GACATCGATAGAGACATGGC	ABHD4	2373	3095	2557	73	1	0	1	1	0	2	2880	0	0	0	1052	2	1458
4|CRko|sg_hABHD4_02|ABHD4	GCTACTCGAAGAACAGCCAA	ABHD4	1200	1655	4355	777	0	0	0	1	0	0	1	0	0	4152	0	0	1417
4|CRko|sg_hABHD4_03|ABHD4	GGAGGGATACATATCTGGCC	ABHD4	1768	3206	5660	7763	1	0	1	2	2	4	1	0	1	0	0	3363	1487
4|CRko|sg_hABHD4_04|ABHD4	GGGGTGCACGGATCTCACTG	ABHD4	1414	1475	1671	1631	1	1	0	2	0	2685	2	0	0	0	1	14387	1507
4|CRko|sg_hABHD4_05|ABHD4	TACTACAGGCTACTCACCCC	ABHD4	817	2298	953	21	1	1	2	4	2	4451	2	0	1	1	5621	0	1413
4|CRko|sg_hABHD4_06|ABHD4	GTTTGGGAGGGATACATATC	ABHD4	1864	2630	903	1463	0	0	0	0	1	0	1	0	1	3500	6961	1305	1130
4|CRko|sg_hABHD4_07|ABHD4	ACTCAATCAAGTACCCTGAT	ABHD4	793	2087	6668	2606	1	0	3	5132	1	1	0	0	2800	2	1	0	1309
4|CRko|sg_hABHD4_08|ABHD4	TCAGCTGAGACATGGAAGTG	ABHD4	1664	3942	2831	2	1436	0	0	0	0	3	1	1	0	0	640	0	1374
4|CRko|sg_hABHD4_09|ABHD4	GCAAAACGACCGCACCCCCT	ABHD4	2438	1839	2586	3712	0	0	0	0	0	2	0	0	0	0	4432	0	1714
4|CRko|sg_hABHD4_10|ABHD4	CCCGAAGCCAAGCAGATCGA	ABHD4	1853	4787	1421	187	2	2	1	6682	3	0	1014	1	0	9628	1	0	1546
4|CRko|sg_hACAA2_01|ACAA2	TACCTGACATCCATTCACAA	ACAA2	2895	2677	2224	13	2	9168	1	1	2299	0	0	2	1	2	1	0	1167
4|CRko|sg_hACAA2_02|ACAA2	TAGCAGTGAAGTCTTTCAGA	ACAA2	1230	4173	6500	1058	3027	1	4206	5	6692	192	1	1	0	2	1	2	1163
4|CRko|sg_hACAA2_03|ACAA2	TGTTACTGCAGGGAATGCAT	ACAA2	5	1637	3437	8379	3	1	2	1	1133	1775	2544	2	0	1	7594	2228	1327
4|CRko|sg_hACAA2_04|ACAA2	TTTCTGTAACTGTTCCAGGG	ACAA2	2495	2241	3782	3423	10111	2	3112	5944	3	1	574	0	0	3937	9185	2693	1289
4|CRko|sg_hACAA2_05|ACAA2	ACAGTTGACAGTGTGATTAT	ACAA2	3193	1108	2521	1498	1	1	4178	5	4	1	559	5398	2	2577	2	0	1134
4|CRko|sg_hACAA2_06|ACAA2	TGCTCGGCCCCAAACCACCC	ACAA2	1224	4008	821	3764	0	0	0	0	0	1	1033	0	0	2759	1	0	1571
4|CRko|sg_hACAA2_07|ACAA2	ACTGCAGGGAATGCATCGGT	ACAA2	1171	813	1	1834	1	4181	0	0	2232	0	2	0	1	0	5990	2	1142
4|CRko|sg_hACAA2_08|ACAA2	CAAGCTTGGATCAGATATCA	ACAA2	3448	580	3897	1060	2953	1	1	3533	894	3	2	0	0	3	0	0	1233
4|CRko|sg_hACAA2_09|ACAA2	TCACAGCAGAGATGGAAAGC	ACAA2	2603	1248	640	925	0	0	0	1	0	0	0	0	0	0	0	0	1386
4|CRko|sg_hACAA2_10|ACAA2	TTTGCGTGTGGGAATCCCAA	ACAA2	650	2587	4751	3726	2	2	0	1308	0	2	698	0	1545	3428	1	0	1120
4|CRko|sg_hACADM_01|ACADM	AAGATGTGGATAACCAACGG	ACADM	1866	2664	2693	2361	1219	1	0	0	0	0	0	0	1	2	0	5757	1326
4|CRko|sg_hACADM_02|ACADM	AATTGGCTTATGGATGTACA	ACADM	1489	1989	1730	0	0	0	803	3	0	3	2	1	0	0	1	3326	1045
4|CRko|sg_hACADM_03|ACADM	ATTGTGGAAGCAGATACCCC	ACADM	1935	4582	3282	603	1	2	3	1	6345	0	1	0	1	0	7625	0	1350
4|CRko|sg_hACADM_04|ACADM	GTATTTGGGGAGAATGACTG	ACADM	1440	2245	1064	617	4020	1	0	3	0	0	2090	0	0	1	0	1841	1197
4|CRko|sg_hACADM_05|ACADM	ACACACATTCCAGAGAACTG	ACADM	2723	3658	4356	621	1	0	0	2410	0	0	0	0	1	0	7296	1	1376
4|CRko|sg_hACADM_06|ACADM	GCTGCAGAATATGATAAAAC	ACADM	1271	2062	1294	805	0	1	1	0	1686	2362	2	0	1	0	0	828	1130
4|CRko|sg_hACADM_07|ACADM	GAATTGGCTTATGGATGTAC	ACADM	2070	3105	1169	118	1	2	2621	2196	3926	1	1	0	0	4904	0	2	1295
4|CRko|sg_hACADM_08|ACADM	CAGAAGATGTGGATAACCAA	ACADM	1465	1215	1956	2805	1	1	3922	1511	2	0	2961	0	3	0	0	1	1316
4|CRko|sg_hACADM_09|ACADM	GTTCATTAAACCAAGTTCCC	ACADM	1875	1523	2597	1671	0	0	0	0	2	1	574	0	0	0	4129	0	1239
4|CRko|sg_hACADM_10|ACADM	GAAAGCTTACCACAGTTCTC	ACADM	667	1479	4836	2615	2061	2	3	8374	2060	1	968	1	2	1	0	4400	1221
4|CRko|sg_hACADSB_01|ACADSB	AGCCAAAGTTGATGCATCTG	ACADSB	2622	2954	4602	1079	0	1	0	2336	0	1	0	1	0	1	0	0	1431
4|CRko|sg_hACADSB_02|ACADSB	ATGGAGAAATCAGTAATACA	ACADSB	621	2410	1926	903	0	1	0	1	0	0	0	0	0	0	0	15884	1188
4|CRko|sg_hACADSB_03|ACADSB	ATTGAGTAGAGCTTCTGACT	ACADSB	696	2053	412	4473	0	1	0	1	0	1	582	0	0	2914	0	3	1238
4|CRko|sg_hACADSB_04|ACADSB	TTCGAATGTTAACGGGCAGG	ACADSB	1351	68	3187	1283	1274	1	3	0	1	6744	859	0	1	4421	4491	2	1276
4|CRko|sg_hACADSB_05|ACADSB	AGTATCACGATCTACTAAGA	ACADSB	572	656	936	2	0	1	0	2836	174	0	0	1	0	0	0	0	1148
4|CRko|sg_hACADSB_06|ACADSB	GAAATGATGATAAAGAGTTC	ACADSB	952	1517	1948	2944	0	1	0	0	0	1	0	0	0	4444	0	0	1116
4|CRko|sg_hACADSB_07|ACADSB	AGCCACAGATGCATCAACTT	ACADSB	1981	641	1464	1	1	0	1	6391	1	1	0	0	0	4549	2	1611	1388
4|CRko|sg_hACADSB_08|ACADSB	GGAGATTATTATGTCCTCAA	ACADSB	266	1463	1181	1116	0	2	1	1	3931	3	1360	0	5810	2	1	8664	1189
4|CRko|sg_hACADSB_09|ACADSB	GGTTCCAGAAGCCAATATCT	ACADSB	1292	2951	4559	6	4204	0	0	1	0	0	887	0	0	1	0	729	1254
4|CRko|sg_hACADSB_10|ACADSB	AGTGAGCTGAGGCAAATAGG	ACADSB	2	2543	4004	1637	1	0	0	1764	1	0	3909	0	1	1	6068	1534	1287
4|CRko|sg_hACAP3_01|ACAP3	CCTCGCTATAGCAACTGTCA	ACAP3	1179	4050	2978	6540	0	6769	0	0	1	1	1785	0	0	2965	1	0	1312
4|CRko|sg_hACAP3_02|ACAP3	CTCCACTTTGGACTCATCGT	ACAP3	961	2410	1169	1879	0	2	6201	2	3	2	1	0	0	2724	110	0	1326
4|CRko|sg_hACAP3_03|ACAP3	CTGGATCAAGGACAAATACG	ACAP3	1819	2808	1199	2459	3494	3	0	1	0	7043	2	2	2	0	1	1229	1317
4|CRko|sg_hACAP3_04|ACAP3	GTTCGCTGACAGCCTACAGG	ACAP3	1214	2094	3685	1398	4940	0	1	4	0	1	3096	0	1	77	3	1	1486
4|CRko|sg_hACAP3_05|ACAP3	GCTCCCACGAGTCCAGCGTC	ACAP3	940	988	4732	5076	0	0	1	2051	2	0	1	0	1	0	2743	0	1556
4|CRko|sg_hACAP3_06|ACAP3	GGAGGGCTACCTCTTCAAGA	ACAP3	110	2138	1659	1560	6133	1	0	0	0	2	0	0	0	2407	0	0	1357
4|CRko|sg_hACAP3_07|ACAP3	CCCACGCACTCACAGAGTCC	ACAP3	2061	3083	4476	1253	2	1	3	3	3	1	1519	10987	3	1	0	7136	1509
4|CRko|sg_hACAP3_08|ACAP3	ACTGTCAGGGCTCTCGCGGT	ACAP3	2177	2	2283	4068	0	1	0	0	0	0	0	1	0	0	0	0	1422
4|CRko|sg_hACAP3_09|ACAP3	GTTTCTGCGGAAGGCGCCCA	ACAP3	451	3796	2263	391	3	1	1	2	0	2	0	1	28477	1	4	2941	1439
4|CRko|sg_hACAP3_10|ACAP3	GTGCTCTGTGAAGCCGTGTG	ACAP3	883	1407	913	1746	2100	0	0	1	0	547	899	0	1	0	0	0	1446
4|CRko|sg_hACBD3_01|ACBD3	AAGAGAACGTCTGCAAAAGG	ACBD3	1695	1493	5605	843	3742	1	0	0	2639	0	760	0	1	0	12389	1	1269
4|CRko|sg_hACBD3_02|ACBD3	ACATCAAAGAATCCAACCTC	ACBD3	2616	4279	1578	3462	2	1	0	1	1	2278	1	0	1	10568	1	6150	1298
4|CRko|sg_hACBD3_03|ACBD3	GGGCCGCGACCGGATCCAGG	ACBD3	1752	2449	1516	470	1	0	0	0	1808	0	958	0	0	0	0	0	1629
4|CRko|sg_hACBD3_04|ACBD3	TGCGTCCCACAAAATAGAGA	ACBD3	759	1961	1756	66	1	0	0	0	0	2	0	1	0	0	0	11463	1134
4|CRko|sg_hACBD3_05|ACBD3	GTAGTTCCCTGGATACTGTT	ACBD3	2058	1162	2178	1728	1	0	1	0	2	0	957	0	4702	3759	0	9194	1271
4|CRko|sg_hACBD3_06|ACBD3	AAAAGGAGGAAGAGAAACGT	ACBD3	1735	1696	2402	1520	1	0	0	2671	0	0	1445	0	0	0	0	0	1293
4|CRko|sg_hACBD3_07|ACBD3	CCAGGCCGTACAACTCCTCC	ACBD3	1200	2462	2263	3012	5	5866	0	0	0	5	2936	21377	3	1	4	0	1507
4|CRko|sg_hACBD3_08|ACBD3	TATGATGTCAGTTAATGGAC	ACBD3	83	927	1	6927	0	0	0	0	0	620	1	0	0	5110	0	4680	1149
4|CRko|sg_hACBD3_09|ACBD3	ATGCAGCCCAACAGTATCCA	ACBD3	2124	4955	2140	1534	4828	4415	1	5	4404	2	3061	1	0	1	11355	824	1257
4|CRko|sg_hACBD3_10|ACBD3	GACAAGTGTCTGGATTATAT	ACBD3	1330	2445	1348	1	1	0	1	0	0	0	0	0	0	0	0	1	1057
4|CRko|sg_hACO2_01|ACO2	ATCTTCTCCGAGAGTGTCAG	ACO2	0	1150	1402	742	8502	4413	1	0	0	1	2	0	1	1	7033	1	1232
4|CRko|sg_hACO2_02|ACO2	GTGCAGCTACCAATTAGACC	ACO2	172	562	1	306	0	262	0	0	0	0	0	0	0	2760	0	0	1288
4|CRko|sg_hACO2_03|ACO2	TCTCGGGGTTTGCGTCGTTG	ACO2	641	396	1296	1501	2817	0	1	1	1	310	1	5010	0	1	0	1	1278
4|CRko|sg_hACO2_04|ACO2	CACATAGCCGTCCCGCTCAA	ACO2	612	853	1223	4084	0	0	0	0	0	0	0	0	0	0	4082	0	1398
4|CRko|sg_hACO2_05|ACO2	AGCCATGACATCCACAGCAT	ACO2	0	3	3349	2	1	0	0	0	1694	0	0	0	0	0	4094	0	1375
4|CRko|sg_hACO2_06|ACO2	ATAGCCGTCCCGCTCAATGG	ACO2	0	474	2132	1	4	5678	1	2	0	2	1	0	31885	0	1	1	1404
4|CRko|sg_hACO2_07|ACO2	GCAGGTGCCAAATATGGCGT	ACO2	1707	523	1854	0	0	0	0	0	0	0	0	0	0	0	0	0	1303
4|CRko|sg_hACO2_08|ACO2	TCATAATGGATGTACTCGTT	ACO2	2	1953	2	551	3765	5741	0	1	1	2	1747	1	0	0	1	2	984
4|CRko|sg_hACO2_09|ACO2	GGCATCCTCACGGTGAAAGG	ACO2	1	0	12	3	0	1	1	2656	2	1	1	0	1941	0	11575	0	1413
4|CRko|sg_hACO2_10|ACO2	CTGGGCCGTCGCATCCTGCA	ACO2	644	409	696	960	1	1	0	0	1	1	959	1	1	1	0	1	1507
4|CRko|sg_hACOX2_01|ACOX2	GACCATCTTCTAACCAACCC	ACOX2	753	1647	3577	2465	1	0	1	5692	1	1	1246	0	0	0	0	0	1403
4|CRko|sg_hACOX2_02|ACOX2	GCATAACTGATGGCCAGCTG	ACOX2	1151	3030	2350	1934	0	5606	3	2	1	0	2319	0	6997	0	5571	3477	1527
4|CRko|sg_hACOX2_03|ACOX2	GTGTATCACAAACTCCTGGG	ACOX2	1794	3235	3687	3569	4735	1	0	1504	0	1	1	0	1	1543	2	1682	1236
4|CRko|sg_hACOX2_04|ACOX2	TGCTGTACCGAGTTTGACGT	ACOX2	188	2848	1671	2403	1	0	0	3558	0	2	1	1	2	5542	0	0	1397
4|CRko|sg_hACOX2_05|ACOX2	ACAGTCTCCAGGCCACCATT	ACOX2	380	2681	1856	320	0	0	0	1	0	0	0	0	0	9129	0	0	1444
4|CRko|sg_hACOX2_06|ACOX2	TGGTCCTGAAGACTCCGGAT	ACOX2	757	1686	3086	7	4095	1	0	1	2	1	1627	0	1	1	0	2	1348
4|CRko|sg_hACOX2_07|ACOX2	CATGCTGAGTCGCTTTGCAC	ACOX2	1423	1260	1589	1047	1	0	0	0	0	0	1512	1	0	1874	0	0	1443
4|CRko|sg_hACOX2_08|ACOX2	GTTCTCACCCTCGTAGGTAC	ACOX2	2944	4316	2562	1170	0	0	0	3	1	0	378	0	0	2842	4956	1574	1298
4|CRko|sg_hACOX2_09|ACOX2	CCGCAGACAGCAGGTACCTC	ACOX2	1109	2548	4123	3165	0	2	0	1	1	3	0	0	1	4486	4314	2568	1515
4|CRko|sg_hACOX2_10|ACOX2	GTAGCGCATGGCGATGACAC	ACOX2	1413	1134	3	1082	1	2	5175	2579	2	1960	2	1	19634	0	0	11188	1390
4|CRko|sg_hACP1_01|ACP1	ACATAGTATATAATCAAATG	ACP1	1786	1589	735	3272	0	1	0	2218	1	1	1670	7976	6321	9555	1	8422	978
4|CRko|sg_hACP1_02|ACP1	ACCCAGACACACAAACAGCA	ACP1	1615	2133	8859	859	2909	7496	1	2599	1	2	1580	2	1	43	8965	1	1432
4|CRko|sg_hACP1_03|ACP1	GGAACCCCCCTGACTACCGA	ACP1	2977	1098	5999	4021	1	1	1	6984	1	4033	1574	0	2	5783	0	7249	1552
4|CRko|sg_hACP1_04|ACP1	GGGGTTCCCTATCTCATACC	ACP1	754	2981	1262	1661	0	0	1	2385	2	1116	0	0	1	0	0	3501	1207
4|CRko|sg_hACP1_05|ACP1	CAACTTCCGGGTATGAGATA	ACP1	5	3455	2	5398	2792	0	2	1717	0	2	1	0	0	1	1	0	1204
4|CRko|sg_hACP1_06|ACP1	AGTCCAAGGACGGTACCTGC	ACP1	1230	2529	1766	4815	8329	2	1	3	2	0	808	0	1	4956	2	5445	1512
4|CRko|sg_hACP1_07|ACP1	GAGGGCAGAGCTGCATGAAG	ACP1	2263	719	6387	3579	0	4245	4425	11	2	0	1835	0	0	2620	1	2790	1447
4|CRko|sg_hACP1_08|ACP1	GTATGGATGAAAGCAATCTG	ACP1	1856	2394	1513	1751	1	2	1794	2114	0	5812	195	1	0	2	2545	0	1298
4|CRko|sg_hACP1_09|ACP1	GTAGACAGCGCGGCAACTTC	ACP1	1712	3787	2085	448	1	1	3	4727	5	1	2991	0	0	4363	2	0	1455
4|CRko|sg_hACP1_10|ACP1	TAGACAGCGCGGCAACTTCC	ACP1	1585	1811	634	95	0	0	0	2666	0	1	1459	1	0	6561	0	2893	1436
4|CRko|sg_hACP6_01|ACP6	AAAAAGGTGAAGGACAGGAT	ACP6	1411	1251	2609	904	1	1	0	1	0	0	2	0	5215	0	1	0	1271
4|CRko|sg_hACP6_02|ACP6	ACAGTCACCAATCTAGCTGG	ACP6	1247	2472	5047	1182	2	3	1567	7	2187	1	2909	0	0	10449	2	4113	1471
4|CRko|sg_hACP6_03|ACP6	ACCAACCTTCAACCCACAGG	ACP6	1479	460	2420	7066	8797	1	0	1	1	0	2	1	0	3158	1	0	1465
4|CRko|sg_hACP6_04|ACP6	GCAGGTCGTGTTTCGACACG	ACP6	803	2137	5013	5265	1	1	0	1	0	1144	1	1	0	0	0	3620	1372
4|CRko|sg_hACP6_05|ACP6	AAAGCCCAGCCAGCAAACAA	ACP6	1809	1043	2467	5872	1729	6	3	6	3	2	3382	9585	34244	7206	4	2	1388
4|CRko|sg_hACP6_06|ACP6	GAGACTGAGGAAGAACTATG	ACP6	3460	1338	693	1606	4977	1	1	0	0	1	592	0	0	0	1	1	1287
4|CRko|sg_hACP6_07|ACP6	GGTGGGACCTCTAATAGCTG	ACP6	2053	3994	6263	1025	6128	2	2	2	1	2	3	0	0	2765	2	26618	1388
4|CRko|sg_hACP6_08|ACP6	GGAGCCTGAGGCAGAGAACC	ACP6	2111	3515	2316	72	2866	0	0	1964	0	2	1	0	1	1	0	1567	1325
4|CRko|sg_hACP6_09|ACP6	TGAGAGTCGTAAGGAGAATA	ACP6	1809	1316	4659	3469	0	1	1	0	1	2	2514	0	0	0	1	0	1051
4|CRko|sg_hACP6_10|ACP6	CCATGCTGAAGAGATTTGCA	ACP6	1309	4340	1792	778	3	11994	1453	3987	2	2	0	0	3003	2094	0	0	1199
4|CRko|sg_hACTR5_01|ACTR5	CGGGACACGCCCAGCCAGCG	ACTR5	3613	1895	408	2	0	0	0	2	0	0	104	0	0	2863	1	776	1790
4|CRko|sg_hACTR5_02|ACTR5	TCATTTGCCGTGAATACAGT	ACTR5	929	0	876	829	0	0	0	1	0	0	714	0	0	1	0	0	1154
4|CRko|sg_hACTR5_03|ACTR5	TGAGCACAGCTACATCGCTG	ACTR5	1350	2673	4169	8984	5838	2	0	3	2	0	595	10774	1	0	1	0	1567
4|CRko|sg_hACTR5_04|ACTR5	TGGGTAAAACATGCGTACAC	ACTR5	591	1	1538	366	701	0	1	3911	0	3	1	0	0	2430	0	0	1384
4|CRko|sg_hACTR5_05|ACTR5	GGACCGACTGCTATATGTGC	ACTR5	773	3477	3202	1	0	0	0	0	1	0	0	0	8841	0	1	0	1443
4|CRko|sg_hACTR5_06|ACTR5	GGGTCGTTCCAAGTCCGCGC	ACTR5	1449	1655	3024	521	1	0	0	2468	1	0	0	0	1	1	4730	0	1378
4|CRko|sg_hACTR5_07|ACTR5	TCTATTCCATAGGCAACCTT	ACTR5	566	1179	448	1	5	0	0	1	0	1138	1	0	1	2	0	1418	1242
4|CRko|sg_hACTR5_08|ACTR5	AGCGGAAGTCAACCTCGAGG	ACTR5	1325	2392	2225	2900	0	0	0	3518	0	1	869	0	0	0	0	0	1487
4|CRko|sg_hACTR5_09|ACTR5	TCCTCCAGCTGAAGTACCCT	ACTR5	0	2417	527	2	0	0	11933	6	2348	0	4	0	1	1	3	1	1239
4|CRko|sg_hACTR5_10|ACTR5	ACCGGCACGTTGCGGTCGAA	ACTR5	1203	254	2612	6306	0	0	1373	1	0	1	2	0	0	0	5540	3073	1099
4|CRko|sg_hADAR_01|ADAR	AGGCAATCAACACCTCTCTG	ADAR	1662	3599	3831	4558	0	1	0	0	1	2	1	1	1	4033	1	0	1496
4|CRko|sg_hADAR_02|ADAR	CGTTCTCCCCAATCAAGACA	ADAR	2021	4070	2513	482	1	0	1	3	1	1002	0	0	5008	8489	2	1	1353
4|CRko|sg_hADAR_03|ADAR	GTGCATACACTCAAGCAGTG	ADAR	1804	1930	712	1353	1	0	1	4279	1	3	0	0	2	3131	0	0	1453
4|CRko|sg_hADAR_04|ADAR	TTCTTGTAGGGTGAACACCG	ADAR	43	3013	866	709	110	0	0	1	0	0	1251	0	10269	0	0	0	1195
4|CRko|sg_hADAR_05|ADAR	AAGGGACAACCCCTCCCATA	ADAR	2565	1665	6186	3447	2942	1	1	2	721	1	0	0	1	0	0	727	1263
4|CRko|sg_hADAR_06|ADAR	TACCTGAACACCAACCCTGT	ADAR	818	3269	934	2560	2	1	2	2	7071	3006	0	6090	2	2	2	3553	1531
4|CRko|sg_hADAR_07|ADAR	GAGGGGCCATTGTAATGAAC	ADAR	980	3220	933	3040	8214	4	4	2157	3	2534	3	0	1	5150	2	3	1327
4|CRko|sg_hADAR_08|ADAR	TAGGACATACTTGGGTTCAT	ADAR	1571	1160	887	1134	0	0	429	2601	2	0	0	0	0	1	0	4465	1255
4|CRko|sg_hADAR_09|ADAR	GGATCCCCAAACTCAGACCC	ADAR	1767	3210	140	2412	0	2	1	2	2	3	1	1	0	2	9195	1225	1483
4|CRko|sg_hADAR_10|ADAR	CTTGATTGGGGAGAACGAGA	ADAR	2197	1560	3576	2	4	1	1	2	2	2	3	14822	0	2327	1	2	1250
4|CRko|sg_hADCK5_01|ADCK5	CACCCCTCGAAGGACAACAT	ADCK5	1109	3548	2072	4	8854	1	1	6578	2	7	1279	0	8560	3516	7228	1	1482
4|CRko|sg_hADCK5_02|ADCK5	CGCGGGGCACCACGACGTAG	ADCK5	1308	2086	4557	2078	1	0	879	2917	3648	2	0	0	1	0	0	3	1606
4|CRko|sg_hADCK5_03|ADCK5	GTGCCTCTGCCATGACATAG	ADCK5	927	3270	3427	884	0	0	0	0	1	0	568	0	1	10903	1	1	1393
4|CRko|sg_hADCK5_04|ADCK5	TGCCAGGATGTGGGTCCGAG	ADCK5	1581	1042	1515	2863	3	2	2	1	3934	5	1299	0	1	1	0	0	1357
4|CRko|sg_hADCK5_05|ADCK5	AGGGTCCGGGTATACTCGGG	ADCK5	2398	1615	3000	6761	5331	0	0	2356	2	1	546	0	1	2324	0	3289	1370
4|CRko|sg_hADCK5_06|ADCK5	AGAGGCTGTATCCCTAGTTC	ADCK5	2322	1358	769	1405	0	0	1	2	1	0	664	15979	1	0	0	4573	1335
4|CRko|sg_hADCK5_07|ADCK5	GAGCTGGACTTCGAGAATGA	ADCK5	1651	4083	5154	631	1	0	0	0	4415	2	1	0	0	3	2635	13306	1321
4|CRko|sg_hADCK5_08|ADCK5	CCTGCGGGACCGCTTTGATG	ADCK5	1457	2708	212	7	372	1	1204	2	2	1398	418	0	11069	1	2	0	1606
4|CRko|sg_hADCK5_09|ADCK5	CCTCGGAGCCCGCTATGTCA	ADCK5	3127	1573	1025	1483	2	0	1	1618	2	1	842	8016	0	2178	1	922	1564
4|CRko|sg_hADCK5_10|ADCK5	GCCTGTGGTCAGAACAGCCC	ADCK5	2333	1171	4910	367	1	1	0	279	0	1	1879	0	13437	1	0	1	1505
4|CRko|sg_hADCY3_01|ADCY3	AGCTGTCTCCAGTACTACAC	ADCY3	790	1783	2029	589	1	0	0	1	0	1	0	0	0	1	0	0	1379
4|CRko|sg_hADCY3_02|ADCY3	CCACGGAGATGATCACGATG	ADCY3	1312	991	378	803	2	4939	2	1091	3	10265	1	0	2	4	14305	0	1491
4|CRko|sg_hADCY3_03|ADCY3	GTCGATGAGTATCTCGACCA	ADCY3	1520	3768	1460	572	0	4818	0	2229	0	3	2	0	0	0	1	1	1228
4|CRko|sg_hADCY3_04|ADCY3	TCTCTTCTAGGTAATCACAG	ADCY3	694	1086	3818	888	1	2	0	1	1	1	1348	0	4983	0	0	2	1131
4|CRko|sg_hADCY3_05|ADCY3	TGTACCGTCACGAGAACGTC	ADCY3	2978	934	3	3254	1	0	0	0	0	0	0	0	0	4062	0	0	1324
4|CRko|sg_hADCY3_06|ADCY3	TGCCCACGCGGCTAGTGACA	ADCY3	571	1131	1151	2220	0	0	0	0	0	0	0	0	0	2554	0	0	1437
4|CRko|sg_hADCY3_07|ADCY3	GGCGGACTCTCGCTCAAGCA	ADCY3	947	3870	4050	5874	2149	2	1	1	2	1	12	0	0	5694	0	1832	1517
4|CRko|sg_hADCY3_08|ADCY3	TCGAGATACTCATCGACCCC	ADCY3	893	3003	2	1433	2	3	1	7348	1	0	1080	0	15794	3762	1	5239	1355
4|CRko|sg_hADCY3_09|ADCY3	CTTGCGGTCAGCCATGTAGT	ADCY3	636	1858	1685	2779	2	2	1426	1	4151	846	2	0	1	2	7355	1	1288
4|CRko|sg_hADCY3_10|ADCY3	GAGGCATCCCACTTACGAGA	ADCY3	3643	2079	4261	4350	2	0	4138	1220	1	0	1746	2	2	0	6078	1	1421
4|CRko|sg_hADK_01|ADK	AAAGTCGAATATCATGCTGG	ADK	1456	1015	693	7268	2	6346	1	2	1	3	1	4582	9116	1484	0	1	1282
4|CRko|sg_hADK_02|ADK	ACAGCAGAGATGTCAAGCAG	ADK	1798	3095	3267	339	1	2	3	409	4	1	801	19747	21163	2	0	1647	1387
4|CRko|sg_hADK_03|ADK	GTAGTAATGAGCATCCACAT	ADK	1137	611	3011	1266	0	0	0	2	1	12302	1	0	0	2762	0	0	1243
4|CRko|sg_hADK_04|ADK	TCTGGAGAAAAACTGGATGT	ADK	865	753	960	475	0	0	0	0	0	1	1208	0	0	0	0	1	1218
4|CRko|sg_hADK_05|ADK	AAAGGAAAAACATCTTGATC	ADK	656	3264	610	69	3	0	2805	1	1	2	2	2	1	3868	0	0	1183
4|CRko|sg_hADK_06|ADK	AAACTGTAAGAAAAAAGCCC	ADK	1011	233	504	1	0	0	0	1	1857	0	0	0	0	5204	1	0	1254
4|CRko|sg_hADK_07|ADK	TTGTAGAACTGGCTAATAAA	ADK	1225	1307	3011	1299	0	0	1	0	0	1550	0	0	0	0	3487	0	1059
4|CRko|sg_hADK_08|ADK	GAGCAGAATGAGCAGCCAAC	ADK	1118	3201	3799	1407	9310	0	0	0	0	1	0	0	1	9722	3378	0	1563
4|CRko|sg_hADK_09|ADK	CAGCAGCAAGATTAGCTATG	ADK	1084	951	5981	1171	1	3	0	1	1690	1	0	0	2279	1	3337	0	1386
4|CRko|sg_hADK_10|ADK	CATGCAGCACAAGTTCCTGT	ADK	1481	1453	4	1238	2	1	1323	2	1	411	2501	0	1	0	1	8118	1595
4|CRko|sg_hADM_01|ADM	CGACGCGACATCCAACCGAG	ADM	1972	1791	5421	5602	3134	0	3521	4	1	1	1	0	0	2	1	0	1571
4|CRko|sg_hADM_02|ADM	CTAGGAAGGCGAGCGAACCC	ADM	1667	2511	3939	2345	2	1	0	4130	1	9546	4	0	5565	1	2811	0	1483
4|CRko|sg_hADM_03|ADM	GCACCGTGCACGTCCCGAAG	ADM	1966	588	1236	925	0	0	1	2	0	1	986	0	8245	0	0	1355	1426
4|CRko|sg_hADM_04|ADM	TCTGGCGGTAGCGCTTGACT	ADM	1097	1784	4812	595	2	1	0	2	6717	2	1	1	4939	0	6864	0	1337
4|CRko|sg_hADM_05|ADM	AGGCGCTGACACCGCTCGGT	ADM	144	2487	778	957	1	0	1	0	2184	1	0	1	0	5517	5035	1	1011
4|CRko|sg_hADM_06|ADM	ATTCGGCCCCAGGACATGAA	ADM	592	2807	1189	8555	3	1	0	2	3	4	1644	0	1	0	4392	0	1216
4|CRko|sg_hADM_07|ADM	TCACGTCAGCGAGCCCGGTG	ADM	1583	3748	4419	6135	1	1	1	0	3499	1	2160	0	0	0	1	0	1585
4|CRko|sg_hADM_08|ADM	CAGAGCATGAACAACTTCCA	ADM	1145	2247	1809	623	2	1	1	2	1	6517	605	9987	2	6940	1	3	1417
4|CRko|sg_hADM_09|ADM	GGTAGCGCTTGACTCGGATG	ADM	1447	1595	1595	709	2	1	0	2	0	1	586	0	10529	0	0	0	1405
4|CRko|sg_hADM_10|ADM	TCCGTCGCCCTGATGTACCT	ADM	750	3351	1950	1769	2	43	1	1	0	1717	2	13057	1	1	1	3151	1335
4|CRko|sg_hADNP_01|ADNP	GTTGGTCAGTCAATGAGACT	ADNP	1252	536	1486	2727	0	0	0	0	1401	2	804	0	0	0	1	0	1286
4|CRko|sg_hADNP_02|ADNP	TCAGATTGTATGTAGTTACC	ADNP	734	1081	1556	82	2	7770	0	2752	4	2	347	0	1398	6870	0	0	1183
4|CRko|sg_hADNP_03|ADNP	TGGAGACTGATTAAGCCGAG	ADNP	2617	1530	7118	1057	3452	0	0	1	1769	4	741	0	0	0	11943	2	1368
4|CRko|sg_hADNP_04|ADNP	TTGCACATCACTTACGAGAG	ADNP	505	1490	1446	1387	1	0	2	3755	0	1	727	9403	0	1	0	0	1266
4|CRko|sg_hADNP_05|ADNP	GATGAACCGTCTGAATAACT	ADNP	1940	355	2201	591	5000	0	0	1	0	0	1	0	0	1	0	0	1292
4|CRko|sg_hADNP_06|ADNP	ACAGACCATGAATTAACATA	ADNP	1370	425	2969	31	0	0	0	1	1	1892	0	1	0	0	5906	5899	1157
4|CRko|sg_hADNP_07|ADNP	GGAGACTGATTAAGCCGAGA	ADNP	2900	2072	2618	1554	0	0	0	0	0	1	0	0	0	2704	0	0	1332
4|CRko|sg_hADNP_08|ADNP	ACTGACCAACACTGTAACCC	ADNP	1213	1465	1576	258	2726	1	1	0	0	2	1	0	7556	1	1	1	1523
4|CRko|sg_hADNP_09|ADNP	ATCGAAGACCATGAACGTAT	ADNP	1	685	3187	766	0	1	0	0	1	1556	3135	3	2	1	2	0	1272
4|CRko|sg_hADNP_10|ADNP	GAGTTGAGGAAGTGTTACCT	ADNP	596	1533	1510	1327	2373	2	1	0	0	1	1	0	1	1	0	0	1307
4|CRko|sg_hADO_01|ADO	ATGGACAAGCTAGACGCGGG	ADO	2238	2155	1850	1375	2	0	0	3	7240	0	0	0	0	0	5	1397	1388
4|CRko|sg_hADO_02|ADO	CCCGGGAGCGAGAAGCCGTG	ADO	529	1735	2861	5782	0	0	325	2	3591	1	652	0	0	13630	1	1	1601
4|CRko|sg_hADO_03|ADO	CGATGTTCAAGTCCTCGGCG	ADO	0	1388	1179	1107	1859	0	0	2479	1	1441	1	0	0	0	0	1303	1387
4|CRko|sg_hADO_04|ADO	CGTCGCGATCGGAAGCGCCG	ADO	1768	932	2	2566	0	1	1	1	1	0	734	0	0	0	0	0	1505
4|CRko|sg_hADO_05|ADO	TGCATGGACAAGCTAGACGC	ADO	923	139	2181	544	2	0	1	0	0	0	2	0	0	0	0	1877	1306
4|CRko|sg_hADO_06|ADO	TAGATGTGCATGTAGGTGAC	ADO	1076	2899	2	246	0	1	0	1785	0	0	646	0	0	0	0	0	1215
4|CRko|sg_hADO_07|ADO	ATCCCGCTGCACGACCACCC	ADO	863	1617	5419	1808	0	1	1	3384	1	3	0	0	1	3008	10340	0	1869
4|CRko|sg_hADO_08|ADO	TCTTGAGCAGGAACACGCCC	ADO	2447	1216	2168	1142	1	0	0	4184	1931	1	1487	0	1	1	2	0	1569
4|CRko|sg_hADO_09|ADO	GGAAGGTGAGGCAAGCCTGG	ADO	550	4714	1568	3198	3	0	0	2	2	2906	1	0	1	5352	5086	0	1440
4|CRko|sg_hADO_10|ADO	GCTGCAGTGTGGCCTTGCGC	ADO	348	1687	3811	4991	0	4948	2	2	0	0	0	0	0	4631	2	0	1675
4|CRko|sg_hADPRHL1_01|ADPRHL1	CATGCACATCGCAACCGCCG	ADPRHL1	1125	1169	4640	1496	3142	0	0	1	1	1134	0	0	4049	1	6846	0	1607
4|CRko|sg_hADPRHL1_02|ADPRHL1	CTCCTGGCGAGAGTACGAGG	ADPRHL1	3601	1645	3328	1447	3577	1	1	0	2	1	2	0	0	0	0	4618	1409
4|CRko|sg_hADPRHL1_03|ADPRHL1	GGAGATGGTGAGATGCTATG	ADPRHL1	1524	1854	3790	431	3547	2	2	4572	4	3	1519	10993	1	8748	5418	1753	1341
4|CRko|sg_hADPRHL1_04|ADPRHL1	TGCGGCGAACGACACAAACA	ADPRHL1	2254	2232	1360	1184	1	9283	23	1	2133	463	5	1	290	6447	0	1	1413
4|CRko|sg_hADPRHL1_05|ADPRHL1	GCTCCTGGGGCCACAGACGA	ADPRHL1	2654	857	2331	10	3	0	1	3	0	2	2345	0	0	5392	6834	0	1378
4|CRko|sg_hADPRHL1_06|ADPRHL1	ATGACCCACAACCATCCCAC	ADPRHL1	2645	675	4354	8619	5602	2735	1	2	1	1025	862	1	3	2	0	0	1525
4|CRko|sg_hADPRHL1_07|ADPRHL1	AGGGCGTCATAGGCTATCAT	ADPRHL1	2812	3281	2583	5099	1	0	0	1	0	0	2	0	3430	0	1	0	1415
4|CRko|sg_hADPRHL1_08|ADPRHL1	TGGACCGATGGAGCGTTCAG	ADPRHL1	11	522	1634	2827	4	2	0	2587	1	10685	814	0	1	4371	1	1	1434
4|CRko|sg_hADPRHL1_09|ADPRHL1	TGCAGGAGCTGGAAGCGCGT	ADPRHL1	3431	1620	5169	2868	0	0	0	0	10	0	2921	0	3635	0	9309	0	1507
4|CRko|sg_hADPRHL1_10|ADPRHL1	AGCAAGTGCCGTCCCCGACT	ADPRHL1	1648	2881	3052	1512	1	2	0	0	1	0	0	1	1	0	12530	7060	1473
4|CRko|sg_hAEBP2_01|AEBP2	CTCCATCTACCAGTCAAAGT	AEBP2	1744	2136	3451	3209	1	0	2	2	1	0	0	0	2036	0	3053	0	1210
4|CRko|sg_hAEBP2_02|AEBP2	GAGGAGCCCAAGGGACCGCG	AEBP2	813	3788	3017	651	1	1	0	1	1872	3	1422	1	0	2066	4933	0	1574
4|CRko|sg_hAEBP2_03|AEBP2	GCGGCGCTGCTGCTGAACGG	AEBP2	2	517	2093	856	2	2	2	1938	1	2987	0	0	0	2	2	1	1635
4|CRko|sg_hAEBP2_04|AEBP2	GTAGACAGCACAATTTCCAG	AEBP2	1296	2601	2267	1240	6	0	8604	1	1	4	1	0	1	0	1	0	1250
4|CRko|sg_hAEBP2_05|AEBP2	TCGCTGACCATCTACATGTA	AEBP2	750	1713	1288	4729	0	1	0	1662	1	0	1	0	0	0	0	0	1263
4|CRko|sg_hAEBP2_06|AEBP2	TAGCATAAGCAGTACTATAA	AEBP2	1657	1433	4	728	2	0	5954	2178	3	2	2	2	0	2133	9500	3	1067
4|CRko|sg_hAEBP2_07|AEBP2	CAGTGGAGACAAACCTTTCA	AEBP2	2	889	2815	555	0	1	9	6361	1945	745	1406	0	1	0	1	3603	1313
4|CRko|sg_hAEBP2_08|AEBP2	AGCAGCAGCGTAGTCTCCAG	AEBP2	2586	1695	2565	793	1	1	0	3	0	1	2	11694	0	4616	1	0	1445
4|CRko|sg_hAEBP2_09|AEBP2	AGTTGAAGCAAGCCTGGCAC	AEBP2	1252	3604	994	2232	1	9711	1	2232	1669	0	3	1	1	0	3	1	1402
4|CRko|sg_hAEBP2_10|AEBP2	GGATGTGATCTGCCAGATCT	AEBP2	1794	2548	3230	1796	2	2	1316	1973	2	1	1	1	7711	3603	0	1241	1314
4|CRko|sg_hAFF1_01|AFF1	AATCTGTCACCGAAGCACAG	AFF1	1054	3058	3175	1575	2	0	1	0	0	0	0	0	1	2489	0	0	1430
4|CRko|sg_hAFF1_02|AFF1	ATGGGCCGGACATAAGCCGT	AFF1	1786	3934	5282	3761	2	0	1	2	0	0	1581	1	0	0	5016	1567	1551
4|CRko|sg_hAFF1_03|AFF1	GCCTGAGAGAGCCTTAGAGG	AFF1	1470	1924	3524	7	0	1	2597	3112	1	1	1	1	1	3599	1	1	1421
4|CRko|sg_hAFF1_04|AFF1	GGAGCACAGAGCCCCCACGG	AFF1	766	3830	3830	875	1	0	3016	1	4	4141	1	0	2	1546	1	0	1770
4|CRko|sg_hAFF1_05|AFF1	GAGTGTGAGACTTAGTACTA	AFF1	1530	680	1727	1	0	1	180	1	1625	2075	536	9847	0	4069	1	805	1167
4|CRko|sg_hAFF1_06|AFF1	GGAATGTATAGGTGACAAAG	AFF1	573	2399	3601	4139	4790	0	0	2	1	0	403	0	0	113	4503	8309	1223
4|CRko|sg_hAFF1_07|AFF1	TATCCGAGAGAGCAGGTCTA	AFF1	1269	2098	2422	183	0	0	1	0	0	0	0	1	0	0	0	1	1226
4|CRko|sg_hAFF1_08|AFF1	GAGGAGCTGTCAGAAGTCTC	AFF1	406	2748	3685	1822	0	4908	0	1	0	1	0	0	0	4100	0	0	1360
4|CRko|sg_hAFF1_09|AFF1	GAGGGGGAACACGGTACCTC	AFF1	2292	4558	2056	1170	6299	0	1	1	1	2	1258	0	1	1543	0	0	1446
4|CRko|sg_hAFF1_10|AFF1	AAGGTCGTCTTCGAGCATGC	AFF1	501	1364	395	283	0	0	0	2256	0	1	0	0	0	0	0	1	1245
4|CRko|sg_hAGFG1_01|AGFG1	ACCACAGGTAAAGCTCCTGT	AGFG1	1246	2033	1151	3030	1	4	0	2111	5	5	801	0	2	0	7390	3232	1435
4|CRko|sg_hAGFG1_02|AGFG1	CAGTTGTAGGTCGTTCTCAA	AGFG1	1507	1558	4011	2783	5475	0	673	4190	2080	2	1352	0	0	8633	1	0	1236
4|CRko|sg_hAGFG1_03|AGFG1	GCCGACCGTCATGTTAACGT	AGFG1	1432	2657	2835	866	0	0	0	0	0	1	0	0	0	3895	0	0	1377
4|CRko|sg_hAGFG1_04|AGFG1	GGTTCCAAAATCAGCACTGG	AGFG1	2198	3236	5012	2415	2	2	5	3271	4	0	4394	1	5749	2231	1967	5043	1434
4|CRko|sg_hAGFG1_05|AGFG1	GATGCATTTGGACAGTCTAG	AGFG1	1077	1622	6798	1968	0	0	2	0	1	2	1530	1	1	2	1	0	1362
4|CRko|sg_hAGFG1_06|AGFG1	ATGAACTGATGCCACGACTT	AGFG1	3029	4111	2608	671	0	1	2	3	1	7953	0	1	0	0	2	1	1399
4|CRko|sg_hAGFG1_07|AGFG1	GAAGGTTCCAAAATCAGCAC	AGFG1	2972	1628	2778	2481	1	0	0	2	1	0	3246	0	0	0	0	1	1230
4|CRko|sg_hAGFG1_08|AGFG1	GAGATAGATTTCACCCTGTG	AGFG1	1769	1132	3626	3182	0	1	0	0	0	1	2014	0	0	0	8714	4	1323
4|CRko|sg_hAGFG1_09|AGFG1	GGTTTGTAGTCCCCAGTTGT	AGFG1	1288	1696	630	3848	3	2	62	6	1	2	2508	0	1	0	1	1	1312
4|CRko|sg_hAGFG1_10|AGFG1	AGGATTAAATCCACCACACA	AGFG1	763	3371	3533	4955	0	2	0	2242	3905	1	1	0	0	3212	0	2	1248
4|CRko|sg_hAGO3_01|AGO3	ATGTCGTAGCACCACATCAA	AGO3	1194	1113	1621	997	2	1	6625	2215	6	1	4	0	2016	2	3	0	1360
4|CRko|sg_hAGO3_02|AGO3	GGATGACGATAATAAGCTGT	AGO3	1246	1401	225	2	5633	0	0	2	2330	3	1453	1	5377	3178	12382	0	1354
4|CRko|sg_hAGO3_03|AGO3	GTGTTTGTAATGTAACAAGG	AGO3	1029	1217	4764	621	1	0	1217	1	0	5980	347	0	1	3	16444	1379	1180
4|CRko|sg_hAGO3_04|AGO3	TGTGAAGGCATTACTTCTAG	AGO3	663	888	1616	829	2	0	0	0	1	0	0	0	0	0	0	0	1213
4|CRko|sg_hAGO3_05|AGO3	GATTGATGTCTACCTCTATG	AGO3	1842	2542	6046	1687	2	0	0	1	2279	1	1561	0	4456	2854	2	6190	1271
4|CRko|sg_hAGO3_06|AGO3	AAGGCATTACTTCTAGTGGC	AGO3	471	1701	842	996	1	0	0	2	1	0	0	0	0	2312	0	2875	1330
4|CRko|sg_hAGO3_07|AGO3	AGTTGCCACAGGAAGTGGAT	AGO3	3064	1921	1945	1000	3138	0	0	7729	1109	0	0	0	1	0	4938	1	1291
4|CRko|sg_hAGO3_08|AGO3	TCACACATGAACTGAATTAC	AGO3	2	1064	641	1	1	6913	1	2	2	3	2	0	0	2302	9538	3116	1208
4|CRko|sg_hAGO3_09|AGO3	ATGGAGTATGGGACATGCGA	AGO3	5	3254	4332	1549	2	0	0	2	0	0	0	0	6837	3166	0	0	1307
4|CRko|sg_hAGO3_10|AGO3	TTTGTAGATACACACCTGTG	AGO3	1483	2645	1793	2305	2	6560	1	0	2	3	3	0	8621	0	2	2	1281
4|CRko|sg_hAHCYL1_01|AHCYL1	ACTCAGGAAACGTGCTCAGG	AHCYL1	1357	2459	1594	1664	5236	0	0	0	1	2	726	0	0	3986	0	0	1394
4|CRko|sg_hAHCYL1_02|AHCYL1	AGATGTTACAAGCAGACCAG	AHCYL1	284	1379	2057	1694	3668	0	1	1780	0	0	0	0	0	0	0	0	1410
4|CRko|sg_hAHCYL1_03|AHCYL1	GATGTTTGGTGGGAAACAAG	AHCYL1	2	1169	1936	783	1	2	1155	1	1	1224	1	0	0	0	0	0	1154
4|CRko|sg_hAHCYL1_04|AHCYL1	TGGGGGAGACTTAACCCACT	AHCYL1	472	817	1073	607	1	0	0	1	1	1	1355	12000	0	0	0	2986	1247
4|CRko|sg_hAHCYL1_05|AHCYL1	TCTGGCTGTTCTATAGATCC	AHCYL1	1304	1153	2328	2027	1	9931	0	3	1158	5467	3	0	1	2905	2	2027	1187
4|CRko|sg_hAHCYL1_06|AHCYL1	GAATCATTGACGTTCATGGC	AHCYL1	194	1958	890	2091	2730	0	1101	2	2	1	0	0	2	1	0	1	1199
4|CRko|sg_hAHCYL1_07|AHCYL1	CTGACAGCTACAGTTCAGGT	AHCYL1	2054	971	322	3119	0	1	0	0	2	1	1617	0	0	1	0	7117	1363
4|CRko|sg_hAHCYL1_08|AHCYL1	AGCACAGATGGGGTCGATTT	AHCYL1	455	1629	1853	1658	1	0	641	1	1	2	187	0	0	9881	1	1	1283
4|CRko|sg_hAHCYL1_09|AHCYL1	AGCAGGCAGAATTTGGACGC	AHCYL1	2097	835	2049	700	0	1	1	4908	2144	4	897	0	0	0	0	0	1432
4|CRko|sg_hAHCYL1_10|AHCYL1	AGGACCACAGATGTGATGTT	AHCYL1	1	1400	943	426	7404	0	0	2	2071	0	1	0	1	2179	2	0	1293
4|CRko|sg_hAIFM1_01|AIFM1	AGACACTGCGATTCAAACAG	AIFM1	714	579	6	1113	2	2	0	0	0	0	0	0	1	1	0	0	1294
4|CRko|sg_hAIFM1_02|AIFM1	ATTGTGGGCTTATCAACAGT	AIFM1	1877	1761	1326	1360	0	0	0	0	0	2	3	0	0	0	0	0	1246
4|CRko|sg_hAIFM1_03|AIFM1	GGAATACTCACCAGATAACG	AIFM1	225	2	1272	149	0	0	0	6751	0	0	1	1	0	0	0	1	1424
4|CRko|sg_hAIFM1_04|AIFM1	TCAATTACGATTATCGGTGG	AIFM1	1	622	14	2362	0	0	1	0	0	0	0	0	0	2	1	2475	1247
4|CRko|sg_hAIFM1_05|AIFM1	GAAAGAGGAGGTCGCATGTA	AIFM1	1861	873	929	0	1	0	0	0	0	0	2167	0	0	0	1	0	1367
4|CRko|sg_hAIFM1_06|AIFM1	AATCAATTACGATTATCGGT	AIFM1	805	517	1	7020	6540	1	0	2117	1	0	0	0	3	1	0	0	1146
4|CRko|sg_hAIFM1_07|AIFM1	ACGGATTGCACAATAGCATT	AIFM1	0	1157	1290	0	0	2	0	0	0	1	1147	0	0	0	1	0	1330
4|CRko|sg_hAIFM1_08|AIFM1	CTGCCTCATATTGAGAATGG	AIFM1	197	2206	41	0	6075	1	1	3296	2	3	0	0	0	0	0	0	1227
4|CRko|sg_hAIFM1_09|AIFM1	GTTCCTTTCCTGCTAATTGG	AIFM1	359	1381	4	1085	0	0	1	0	1	1	1	0	1	4542	0	0	1217
4|CRko|sg_hAIFM1_10|AIFM1	AAGTCTGTCTGCCATTGATA	AIFM1	939	1	2590	1437	0	0	1	1	1	5183	842	1	0	0	0	0	1165
4|CRko|sg_hAIFM2_01|AIFM2	CACTCTCATTCACTCCCAAG	AIFM2	1520	2856	1276	2558	4	0	1	5	2	9523	1	1	0	2780	8541	3	1318
4|CRko|sg_hAIFM2_02|AIFM2	CCAGCGCTCACGGTTCATCG	AIFM2	4138	640	3048	2306	3	10655	5581	6	4	4334	731	0	8170	3	3	4798	1410
4|CRko|sg_hAIFM2_03|AIFM2	TCCGGCAGGGGCTAGTAGTG	AIFM2	2228	1758	2720	208	1	1	2	5	3533	1695	1	0	15665	1	4994	11725	1479
4|CRko|sg_hAIFM2_04|AIFM2	TGAGCGGGTGAGCAATCTGG	AIFM2	2219	3858	477	569	0	0	0	2460	1	1247	674	0	0	0	0	1362	1426
4|CRko|sg_hAIFM2_05|AIFM2	AGGTGAGCGGGTGAGCAATC	AIFM2	581	2903	1300	3957	2	9496	2	3	0	2	1126	0	2	4997	1	7090	1301
4|CRko|sg_hAIFM2_06|AIFM2	GAGTGAATGAGAGTGACCTG	AIFM2	2420	2259	922	1069	2	0	0	2	1730	0	1	0	1	2	4318	2031	1392
4|CRko|sg_hAIFM2_07|AIFM2	AAACCTCATTAAACTTGCCC	AIFM2	2545	1646	1679	2379	0	2	2664	0	0	0	0	0	0	0	0	0	1293
4|CRko|sg_hAIFM2_08|AIFM2	TTCCGGCAGGGGCTAGTAGT	AIFM2	1307	2291	809	3395	0	0	0	0	0	1	0	0	0	3310	0	0	1287
4|CRko|sg_hAIFM2_09|AIFM2	GGAGAGCAGCCACATTGTGG	AIFM2	1092	1269	2581	2139	5100	2	0	2916	1	2	1175	0	1	3322	0	1384	1507
4|CRko|sg_hAIFM2_10|AIFM2	TGCCGGTGCAGAGAATCACC	AIFM2	595	3394	167	1304	0	1	1	1821	0	2	0	1	0	7	0	5900	1290
4|CRko|sg_hAIMP2_01|AIMP2	CCCCGCCAAGACTATCAGCT	AIMP2	821	1198	6217	3084	7998	1	1	1	2117	3	2	0	0	4729	3398	2835	1390
4|CRko|sg_hAIMP2_02|AIMP2	GTTGGGGAGCCGGTACATGC	AIMP2	1	1467	1302	493	4614	0	352	1	3835	1	1	0	1	2	0	2781	1354
4|CRko|sg_hAIMP2_03|AIMP2	TGTAACCAACATAATCCAAG	AIMP2	3920	4065	1375	476	2	1	0	0	2	3	1	1	1	3	9299	0	1215
4|CRko|sg_hAIMP2_04|AIMP2	TTCAGCGCCCCGTAATCCTG	AIMP2	2202	2256	2683	629	3248	2	3	6	4	3309	0	1	2	26	0	30340	1364
4|CRko|sg_hAIMP2_05|AIMP2	TGAATCCCAGCTGATAGTCT	AIMP2	2418	2202	2966	2123	2	0	0	1	1	0	897	8714	1	0	1	0	1293
4|CRko|sg_hAIMP2_06|AIMP2	GTGCAGCACAAGCAGGGAGA	AIMP2	2143	3232	4107	649	0	1	0	6231	2042	2	1417	1	0	1	2	3117	1444
4|CRko|sg_hAIMP2_07|AIMP2	CACGGTGCACACGCACTCCT	AIMP2	23	2022	2405	925	1	1	0	1	2168	1	1945	0	0	0	11875	3473	1573
4|CRko|sg_hAIMP2_08|AIMP2	GGCGCTGGCCACGTGCAGGT	AIMP2	909	637	4972	5615	3	2	1	4	4724	342	688	1	21144	2804	9423	2	1582
4|CRko|sg_hAIMP2_09|AIMP2	CAGACGATGTGCCCCATCGA	AIMP2	71	3355	3810	4559	2	0	5717	0	1	1968	2	0	0	1	1	1581	1511
4|CRko|sg_hAIMP2_10|AIMP2	AACGTGCACGGCAGGAGCTA	AIMP2	1746	1029	3198	4968	0	3	1414	0	0	1	726	0	0	1	3	6900	1410
4|CRko|sg_hAK3_01|AK3	AGAAATTGGCGTGTTAGCCA	AK3	2377	2095	278	914	3154	0	3	0	1016	1128	766	1	0	3072	5996	0	1259
4|CRko|sg_hAK3_02|AK3	ATCCAACAGCCAGCTATACT	AK3	632	3952	214	6277	5928	0	1	3	0	2	1046	0	2	6904	5235	4976	1290
4|CRko|sg_hAK3_03|AK3	GATCTGATAAGCTCTATCTA	AK3	318	3529	1831	374	1	1	1	0	1262	0	0	0	0	0	0	0	1111
4|CRko|sg_hAK3_04|AK3	TGTAGTGATGCGCGACGACA	AK3	1116	1126	670	320	141	0	0	0	0	1	703	0	0	0	14844	0	1438
4|CRko|sg_hAK3_05|AK3	AATGTTATAGACTCGGCCAC	AK3	1098	2261	2393	4186	0	0	0	1	0	0	1	0	7018	0	1	0	1219
4|CRko|sg_hAK3_06|AK3	AGATGATGTCATGACTCGGC	AK3	2182	2221	1762	7477	0	1	0	0	0	1	738	0	0	4037	0	0	1318
4|CRko|sg_hAK3_07|AK3	GAGCTGAAGCACCTCTCCAG	AK3	1127	309	4260	2721	2607	0	1	1470	0	3771	276	0	5762	4615	2	0	1513
4|CRko|sg_hAK3_08|AK3	ACATGCTGCGGGGCACAGGT	AK3	2055	2067	1709	853	6795	0	0	2	1	1	0	0	0	0	0	2	1400
4|CRko|sg_hAK3_09|AK3	TGACCTCAAAGGGCACATTC	AK3	514	920	3881	9	0	1	1	1	0	522	0	0	1	0	0	0	1220
4|CRko|sg_hAK3_10|AK3	GATGAATCCAGCGAGCAGTA	AK3	6	2992	3855	1	1	0	0	2	2	0	1535	0	2	3638	6381	0	1334
4|CRko|sg_hAK4_01|AK4	ATTCTTACATGTACATGAGG	AK4	1532	2051	2209	9	1	1	2	3590	0	0	42	1	0	0	2	3	1107
4|CRko|sg_hAK4_02|AK4	GAGAACATCAAGGCCAGCAC	AK4	1753	666	895	1288	1	0	0	2	4528	3	0	0	0	1	4013	0	1395
4|CRko|sg_hAK4_03|AK4	GTGCCCTTGCCCGAGCCGGG	AK4	1538	664	2391	1649	1	0	3	1	0	1	743	0	1	2760	0	0	1496
4|CRko|sg_hAK4_04|AK4	TCCGAGTTGGAGAACAGGCG	AK4	3739	681	1509	967	1926	1	0	5	10	725	1343	0	32966	4023	2	1	1340
4|CRko|sg_hAK4_05|AK4	TGATGTCCGAGTTGGAGAAC	AK4	3504	1145	691	2621	0	2	2	1	1	0	907	0	0	2920	1	24212	1274
4|CRko|sg_hAK4_06|AK4	CTGGGCGATCCTCTGGCACA	AK4	2593	825	403	3496	401	1	2	2	0	0	1724	1	0	0	7212	1	1471
4|CRko|sg_hAK4_07|AK4	ATTAGGACAAGCCGAAGCCC	AK4	498	454	3347	1257	831	0	1	0	2	0	1717	1	1	2807	1	0	1365
4|CRko|sg_hAK4_08|AK4	ACGCCTAATGATGTCCGAGT	AK4	1179	1544	1285	1598	1	2	2	4	3	13472	1	11076	0	3202	6857	1603	1388
4|CRko|sg_hAK4_09|AK4	ACAGTTTCAACTCACCATCA	AK4	762	3783	4417	2083	4	1	5369	1	2419	2159	776	0	1	0	9874	3282	1174
4|CRko|sg_hAK4_10|AK4	CAGAGGATCGCCCAGAACTT	AK4	212	408	1	1058	1	0	0	3	1	2	2876	1	3400	3159	1	0	1344
4|CRko|sg_hAKAP10_01|AKAP10	ACTGGCTACTGTAAGTGTAG	AKAP10	633	795	3736	1409	3520	7419	0	3	1	0	623	0	1	0	1269	0	1374
4|CRko|sg_hAKAP10_02|AKAP10	CAGATTGAAGTGCTGACCAG	AKAP10	1048	1548	1360	764	113	0	1	2	4	4	1	1	28914	2412	80	1	1355
4|CRko|sg_hAKAP10_03|AKAP10	GGGCCAATATGATGGACAGG	AKAP10	485	4001	2122	1273	66	14280	1	3	1	2	0	1	1	4	0	0	1444
4|CRko|sg_hAKAP10_04|AKAP10	TTGTTTATGACTCATTCAGA	AKAP10	1562	1329	2317	42	2933	0	0	0	1	1	1638	0	0	0	0	1	1024
4|CRko|sg_hAKAP10_05|AKAP10	GACCAGTGGAACTGTTTACC	AKAP10	893	1264	393	14	1	0	0	0	1867	0	789	0	0	0	0	0	1404
4|CRko|sg_hAKAP10_06|AKAP10	ACTTCGGCGAATGGAGCATT	AKAP10	1121	1048	578	511	0	0	0	0	2273	0	0	0	0	1	0	0	1379
4|CRko|sg_hAKAP10_07|AKAP10	AGCATCTGGAGATATATATT	AKAP10	1628	1422	2141	1751	0	1	0	0	0	1483	395	0	0	2678	1	1	1109
4|CRko|sg_hAKAP10_08|AKAP10	ACTTGAAAAGGAGTCCATGT	AKAP10	343	2709	1005	580	2	3	0	0	0	3	777	0	0	1	2	0	1301
4|CRko|sg_hAKAP10_09|AKAP10	AGCCAGGTAAACAGTTCCAC	AKAP10	1013	1515	1106	8432	0	0	0	1	0	0	1344	0	3510	3527	1	0	1563
4|CRko|sg_hAKAP10_10|AKAP10	CACTGGTCAGCACTTCAATC	AKAP10	1337	946	1176	144	3107	1	0	0	821	0	0	0	0	0	0	0	1357
4|CRko|sg_hAKT1S1_01|AKT1S1	CCTGGCCAGAGAGGACAACG	AKT1S1	1120	5205	2297	4347	5	0	802	2523	0	2	1352	0	1	2669	5816	0	1544
4|CRko|sg_hAKT1S1_02|AKT1S1	CTGGGCATTAGTGATAATGG	AKT1S1	782	2479	1306	617	1	1	0	1945	0	3565	1	0	0	0	0	0	1221
4|CRko|sg_hAKT1S1_03|AKT1S1	GGGCCAGTGCGATGTCGTGG	AKT1S1	1476	1913	1409	709	2	0	2	2	1	1	3401	0	1	1	0	1535	1603
4|CRko|sg_hAKT1S1_04|AKT1S1	TCAGACCCCGAGAGTACAGA	AKT1S1	2187	3956	1422	1266	3625	12699	5	5	1	5	1307	2	2	0	331	0	1364
4|CRko|sg_hAKT1S1_05|AKT1S1	TTGCCTCCACGACATCGCAC	AKT1S1	2	1645	2636	686	3289	0	0	4	3266	1	1566	1	0	0	1	4968	1432
4|CRko|sg_hAKT1S1_06|AKT1S1	CCGGGCCCGGAAGCGCTCAG	AKT1S1	3415	1932	4667	3470	0	0	0	0	0	2	0	0	1	0	0	6308	1549
4|CRko|sg_hAKT1S1_07|AKT1S1	GGGTCTGACTCACAGAAGGG	AKT1S1	1598	4425	3266	1081	0	2	1	2	0	2	1	1	0	1610	6018	3896	1387
4|CRko|sg_hAKT1S1_08|AKT1S1	CATGGGCAGCATAGGCACAG	AKT1S1	2416	1603	2274	3438	3	12946	1	5119	2	3	3	0	0	2437	2	0	1316
4|CRko|sg_hAKT1S1_09|AKT1S1	ACTAATGCCCAGCTGCTCCC	AKT1S1	1286	0	289	588	0	0	0	2	2073	0	0	0	0	4330	1	0	1301
4|CRko|sg_hAKT1S1_10|AKT1S1	TGTGGGCCAGTGCGATGTCG	AKT1S1	3477	1778	3257	1087	0	1	1	4	2	1	501	2	48354	5486	1	2	1450
4|CRko|sg_hALKBH1_01|ALKBH1	AGTTTCTCCAGTAAACTTCG	ALKBH1	519	2549	2335	858	0	0	0	0	1	1	2	1	0	0	13484	0	1197
4|CRko|sg_hALKBH1_02|ALKBH1	CTAGCTCAGATCTGTCTACG	ALKBH1	640	2574	4060	139	932	1	2	3	2	4124	2	0	7005	1	1	8169	1364
4|CRko|sg_hALKBH1_03|ALKBH1	GAAACCTAATGTATGTAACC	ALKBH1	1138	898	3969	2127	1	0	0	3472	0	1	1	0	0	0	5482	0	1184
4|CRko|sg_hALKBH1_04|ALKBH1	GAAGCGGAAAAGTTTCCGAA	ALKBH1	849	3404	2690	2162	7922	3	1	3	4	2	1005	0	0	0	1	0	1312
4|CRko|sg_hALKBH1_05|ALKBH1	CCAGTTATAATGGTAGCCTA	ALKBH1	2194	1793	3944	2848	2	1	1	2	1	0	0	0	0	0	17000	3955	1219
4|CRko|sg_hALKBH1_06|ALKBH1	GATCCTGAATTACTACCGCC	ALKBH1	1184	1174	1465	777	0	10064	0	3072	0	1	713	0	1	1	1	1	1344
4|CRko|sg_hALKBH1_07|ALKBH1	GAGCAGAATGCATATAGAGC	ALKBH1	1279	3693	4091	1906	3884	3	0	0	1	1	1	0	1	4066	0	0	1334
4|CRko|sg_hALKBH1_08|ALKBH1	CTTGCTCTGAGAGGAAACCC	ALKBH1	1626	1847	1627	2	2	0	1	2994	1	0	0	0	0	0	0	0	1257
4|CRko|sg_hALKBH1_09|ALKBH1	ACTCACCTGAATGACAGCAA	ALKBH1	1002	3702	4368	1824	0	4	2	1	1	1	1	0	0	3184	4128	0	1274
4|CRko|sg_hALKBH1_10|ALKBH1	AGTGCCACTGGTAACCTGGG	ALKBH1	2574	2778	5245	1838	4735	1	0	1615	1	1	764	0	1	0	0	4084	1515
4|CRko|sg_hALKBH7_01|ALKBH7	AGTGATCGTATTCGTAGCGG	ALKBH7	1046	642	1813	1671	10194	6851	1	4611	0	2	0	0	1	1	0	2824	1221
4|CRko|sg_hALKBH7_02|ALKBH7	CAGGTCCAGCACGTGCACGG	ALKBH7	3418	2871	2449	2299	6750	6304	0	2	2	6585	1220	0	1	2667	4	691	1709
4|CRko|sg_hALKBH7_03|ALKBH7	GAGAGACAGAGAAGTCGCGC	ALKBH7	2099	3408	457	4944	1	0	0	0	1	3	0	0	0	4709	0	1	1175
4|CRko|sg_hALKBH7_04|ALKBH7	TCCTGTCTCCCAGCGTTATG	ALKBH7	1931	1141	3	1997	9194	0	0	3673	0	0	0	1	1	1	5465	0	1173
4|CRko|sg_hALKBH7_05|ALKBH7	GCCGCTACGAATACGATCAC	ALKBH7	391	1056	4366	688	1	0	0	1	0	0	2028	0	0	0	0	0	1469
4|CRko|sg_hALKBH7_06|ALKBH7	TGCACCAGCCGCATAACGCT	ALKBH7	1306	4115	573	300	0	2	2	5207	0	4142	1	0	2	0	0	1	1550
4|CRko|sg_hALKBH7_07|ALKBH7	CGGCTACATCAAGCCCCACG	ALKBH7	1533	3102	5543	1378	35	0	0	2	0	0	0	0	1	2077	0	0	1558
4|CRko|sg_hALKBH7_08|ALKBH7	GCAGGCGGCTCAGCACGGAA	ALKBH7	1516	2463	3977	68	1	0	1	2	0	2	3429	0	1	4859	0	4715	1569
4|CRko|sg_hALKBH7_09|ALKBH7	GTGCACCAGCCGCATAACGC	ALKBH7	1531	1713	1359	947	0	0	1	0	3633	1	1362	0	0	0	0	120	1489
4|CRko|sg_hALKBH7_10|ALKBH7	CAGGAGAGACAGGCCGGCGA	ALKBH7	100	1077	1959	2247	2799	1	0	3028	3	2	0	4	0	1	0	5760	1456
4|CRko|sg_hALYREF_01|ALYREF	AGACGTGCACTTTGAGCGGA	ALYREF	2019	3850	3892	1414	0	0	2	3	2537	0	1842	0	1	0	1	3439	1382
4|CRko|sg_hALYREF_02|ALYREF	GCCTCGATTCACTCGCGCGG	ALYREF	2134	2493	1565	1499	1	21249	1	6	4	4	1	0	1	2413	4	2	1437
4|CRko|sg_hALYREF_03|ALYREF	GCTGTGCACTATGATCGCTC	ALYREF	453	2712	2638	1458	0	0	0	1	1954	0	2755	0	0	0	0	0	1419
4|CRko|sg_hALYREF_04|ALYREF	TTTCCCACCTGTCTCCACGC	ALYREF	0	205	689	118	0	0	0	0	1	0	1	0	0	0	0	0	1289
4|CRko|sg_hALYREF_05|ALYREF	AGTCTCAGACGCCGATATTC	ALYREF	2016	367	0	3006	0	0	0	0	0	0	0	0	1	2339	0	0	1445
4|CRko|sg_hALYREF_06|ALYREF	GCGGAAGGCAGATGCCCTGA	ALYREF	591	1290	0	0	2	2	1	2	0	4182	906	1	1	0	1	1	1528
4|CRko|sg_hALYREF_07|ALYREF	GGAGACAGGTGGGAAACTGC	ALYREF	1	2	941	1	2	1	1	2	0	17293	0	0	3	2	2	0	1478
4|CRko|sg_hALYREF_08|ALYREF	AGATCGTGCTGCCACTTGTC	ALYREF	0	1	0	2	1	6165	0	0	306	0	0	0	0	2	0	0	1453
4|CRko|sg_hALYREF_09|ALYREF	CAGCAGACGTGCACTTTGAG	ALYREF	3097	931	3144	487	4	1	3874	2159	3784	1	1	0	1	2	0	0	1592
4|CRko|sg_hALYREF_10|ALYREF	AAATTCAGCAAAGAGTTCCT	ALYREF	1	530	1353	325	0	0	0	0	1	1	0	0	0	0	0	1	1195
4|CRko|sg_hAMBRA1_01|AMBRA1	CCATAATATCTATATTACGG	AMBRA1	1198	1346	1778	1	0	0	0	1416	2	2022	0	0	0	1	5713	0	1032
4|CRko|sg_hAMBRA1_02|AMBRA1	GGAGCTGGGGACCTGCCAAG	AMBRA1	0	1058	3384	1498	3019	3	0	3	2	18179	1	1	12913	2	1	1	1563
4|CRko|sg_hAMBRA1_03|AMBRA1	GGATGATCCAGTATCTCTCA	AMBRA1	1873	1284	1810	1048	0	0	0	0	0	0	0	0	0	0	0	0	1247
4|CRko|sg_hAMBRA1_04|AMBRA1	TTTCTCGGTGATACCTAGAA	AMBRA1	1727	601	510	4489	1	0	2	0	0	0	0	0	0	0	4453	1	1059
4|CRko|sg_hAMBRA1_05|AMBRA1	AGTACGGCGGTGTCCAATCA	AMBRA1	1227	1432	2361	1600	0	5999	2	1	1	3733	0	0	1	1	13674	144	1212
4|CRko|sg_hAMBRA1_06|AMBRA1	CCAGCATAAGGCAAGTACTC	AMBRA1	466	2463	2006	3738	0	1	2	2	1	0	775	0	0	1	4722	0	1350
4|CRko|sg_hAMBRA1_07|AMBRA1	GTTCAGACTGAGTACTGTCC	AMBRA1	2	398	3730	417	8352	2	0	1	0	1	792	0	3	0	0	1259	1438
4|CRko|sg_hAMBRA1_08|AMBRA1	GACAGCTAGTGAGATGGAAC	AMBRA1	369	1887	1662	237	0	0	0	1935	2	2	2	0	1	0	9287	1	1396
4|CRko|sg_hAMBRA1_09|AMBRA1	CAACAACGATACCCTGCGCT	AMBRA1	1289	3201	4109	3589	6875	1	1	8	2348	2221	5	12711	3776	3550	14907	2	1581
4|CRko|sg_hAMBRA1_10|AMBRA1	TACACCCAGTCCAGCAGATC	AMBRA1	1369	1268	2881	559	1	0	0	1	2373	0	0	0	1	2861	0	0	1058
4|CRko|sg_hAMMECR1L_01|AMMECR1L	CACACGAATGAATCCCGCAT	AMMECR1L	1813	1905	1238	1728	0	2	1579	1	0	2	814	0	0	4989	0	0	1456
4|CRko|sg_hAMMECR1L_02|AMMECR1L	CATCCTCAAAGTTAGTAAGG	AMMECR1L	2418	1272	981	2160	0	0	0	0	0	6	1	0	0	0	0	2530	1176
4|CRko|sg_hAMMECR1L_03|AMMECR1L	TCAGGGAATACACGTTAACC	AMMECR1L	14	1146	703	166	0	0	0	0	0	0	0	0	0	0	0	2992	1253
4|CRko|sg_hAMMECR1L_04|AMMECR1L	TTAGTCCGCTCTTTGTGACG	AMMECR1L	1864	2717	7037	3054	0	3	0	0	1787	4	0	0	0	0	0	2529	1295
4|CRko|sg_hAMMECR1L_05|AMMECR1L	GTGGTGTTGGCAGTTCCATT	AMMECR1L	225	3722	1277	4149	0	1	0	1	0	0	14	1	6313	0	0	0	1245
4|CRko|sg_hAMMECR1L_06|AMMECR1L	ATTTACTCACTAGGGGTCAT	AMMECR1L	605	1526	1779	5	2	3237	2	2081	1489	2	1129	1	1	8761	1	0	1166
4|CRko|sg_hAMMECR1L_07|AMMECR1L	AATGTGTCAGACTTAACTCT	AMMECR1L	1123	1989	5133	27	0	1	1	4431	2	1	1	0	6193	1	0	0	1174
4|CRko|sg_hAMMECR1L_08|AMMECR1L	AAGAGGTCCTGAACTAGAGC	AMMECR1L	1729	3847	4165	451	3	0	0	0	0	1421	0	0	0	1	1	0	1299
4|CRko|sg_hAMMECR1L_09|AMMECR1L	GTTGGCAGCAGGCTGTTGTG	AMMECR1L	3182	5738	7709	2001	0	0	1	2	1	1	1724	0	0	3476	9284	0	1388
4|CRko|sg_hAMMECR1L_10|AMMECR1L	ACACGAATGAATCCCGCATC	AMMECR1L	2688	5841	1439	1809	6454	5	1	1680	2180	3986	1648	0	3742	1	3064	1743	1494
4|CRko|sg_hAMZ2_01|AMZ2	AATGCTGCGTTTGTTTGGAG	AMZ2	598	2621	608	2358	2	0	3	2	1277	1996	2215	16027	2	0	8029	0	1280
4|CRko|sg_hAMZ2_02|AMZ2	AGTCTTGGGGAGCCTCAGGG	AMZ2	2597	3058	4747	1891	1	1	1	0	0	3591	2129	0	1	6	1771	1	1397
4|CRko|sg_hAMZ2_03|AMZ2	ATCTTTACCCAAGAGACTCG	AMZ2	0	1483	1044	1170	0	12455	3	4428	2097	3	0	1	2	0	4788	3	1230
4|CRko|sg_hAMZ2_04|AMZ2	CATACTGTGATACAAGCACT	AMZ2	960	1734	3374	1774	0	0	0	2	0	1	734	0	0	4333	2	16014	1225
4|CRko|sg_hAMZ2_05|AMZ2	AGCATTTATATACAGTCCAT	AMZ2	454	1586	1123	2474	0	0	1	0	1	0	0	0	0	0	5248	0	1167
4|CRko|sg_hAMZ2_06|AMZ2	GATGGAGAATGCAAGGTAAT	AMZ2	662	2900	4212	693	0	1	3	1	1	2	1	12127	1	0	1	0	1279
4|CRko|sg_hAMZ2_07|AMZ2	ACAACACAGAAGGCATCTTC	AMZ2	2120	2597	3204	3078	3909	1	0	1	1	2040	2	0	1	0	1	2	1556
4|CRko|sg_hAMZ2_08|AMZ2	TCATACTGTGATACAAGCAC	AMZ2	373	3473	1	1060	302	0	0	2022	1	1	0	1	0	0	0	0	1225
4|CRko|sg_hAMZ2_09|AMZ2	GTCTTGGGGAGCCTCAGGGT	AMZ2	240	1526	4802	976	0	2	0	1	2	1	892	0	0	1	0	1	1442
4|CRko|sg_hAMZ2_10|AMZ2	GTATGAGAAATTAAATGCTG	AMZ2	1847	1961	780	991	3	2	0	2423	4990	0	698	0	1	2	8093	0	1166
4|CRko|sg_hANAPC11_01|ANAPC11	GAGCACTGGCCCCACACCAG	ANAPC11	315	1854	2	316	0	0	0	2	2386	0	1	0	4770	1	1	0	1725
4|CRko|sg_hANAPC11_02|ANAPC11	GATTAAGTGCTGGAACGGCG	ANAPC11	204	1229	80	1173	2	0	0	1	2	0	1	1	0	0	6372	0	1444
4|CRko|sg_hANAPC11_03|ANAPC11	GCAATGCATGTGGAAGCAGT	ANAPC11	522	502	4104	2311	3	0	6	3	3	5	531	2	97405	0	1	1	1436
4|CRko|sg_hANAPC11_04|ANAPC11	GTGGCCAACGATGAGAACTG	ANAPC11	0	1001	1580	628	0	0	0	0	5	0	0	0	0	0	0	0	1452
4|CRko|sg_hANAPC11_05|ANAPC11	TGAAGGTGAAGATTAAGTGC	ANAPC11	362	0	1265	52	0	0	0	2466	0	0	0	0	0	0	0	1	1214
4|CRko|sg_hANAPC11_06|ANAPC11	GGAGGGGACACTCACAGTCA	ANAPC11	0	562	983	0	0	0	0	0	0	834	0	0	0	0	0	0	1499
4|CRko|sg_hANAPC11_07|ANAPC11	GTTGGCCACCCAGAGCCAAG	ANAPC11	0	3287	652	1624	0	0	1	1	0	1	0	0	0	0	0	908	1570
4|CRko|sg_hANAPC11_08|ANAPC11	GCCCGGCGACGACTGCCCGC	ANAPC11	1	1178	1397	664	3052	0	0	1	0	1489	923	0	0	1	0	1	1805
4|CRko|sg_hANAPC11_09|ANAPC11	GATGCCACAGTTCTCATCGT	ANAPC11	1463	710	1270	1750	1	0	0	0	1	1956	2908	0	1	1	18	0	1541
4|CRko|sg_hANAPC11_10|ANAPC11	TGTGGAAGCAGTGGGAGCAC	ANAPC11	3	4	1487	6369	0	1	1	0	0	0	805	0	0	1	0	0	1449
4|CRko|sg_hANAPC15_01|ANAPC15	ACAGAGTCTCAGTCACACGA	ANAPC15	746	0	1058	2	3076	1	0	0	0	0	1	0	1	0	0	0	1423
4|CRko|sg_hANAPC15_02|ANAPC15	CCACCAGCACTATGATGACG	ANAPC15	2324	2275	3402	2352	1	1	2	2	2	1	422	11622	0	4714	1	1300	1553
4|CRko|sg_hANAPC15_03|ANAPC15	CCCACAGCTCCAAAGCATCG	ANAPC15	2390	2408	298	3912	8752	1	1	3	0	1	1947	1	1	0	2	0	1431
4|CRko|sg_hANAPC15_04|ANAPC15	TAATCTGGATCGACCCTGTG	ANAPC15	1	1	1613	2	0	0	0	1	1	1	1516	0	0	1	0	0	1310
4|CRko|sg_hANAPC15_05|ANAPC15	GCAGCAGGAACAGCAGCATC	ANAPC15	1	1432	2320	749	0	0	1	1	1904	1	1540	0	0	0	0	0	1624
4|CRko|sg_hANAPC15_06|ANAPC15	AGTCACACGAGGGAAGAGTG	ANAPC15	499	478	4451	912	0	0	0	2	0	2	721	0	0	1	0	3227	1446
4|CRko|sg_hANAPC15_07|ANAPC15	GTCACACGAGGGAAGAGTGA	ANAPC15	1371	2109	679	11	0	0	0	0	0	0	0	0	0	0	0	0	1388
4|CRko|sg_hANAPC15_08|ANAPC15	AGCTCTGTCTCTTCCACACA	ANAPC15	665	781	2240	1	2	0	2	2294	4484	1	2	0	1	1	0	0	1399
4|CRko|sg_hANAPC15_09|ANAPC15	CAGCTCTGTCTCTTCCACAC	ANAPC15	1	449	2043	2	0	0	0	1	0	0	887	0	0	1	1	2451	1323
4|CRko|sg_hANAPC15_10|ANAPC15	TCACACGAGGGAAGAGTGAG	ANAPC15	467	333	588	3	92	0	1	0	0	0	0	13569	0	0	6093	3851	1439
4|CRko|sg_hANK3_01|ANK3	CATGTGGATGCGCTTTACTG	ANK3	1266	504	3421	306	3386	0	0	0	1	1786	0	0	3565	0	0	1970	1248
4|CRko|sg_hANK3_02|ANK3	GATGAAGTTCGACTGAAGTG	ANK3	2386	1031	968	11217	5	3	3	3625	1	21571	2537	0	14511	2983	4	517	1217
4|CRko|sg_hANK3_03|ANK3	GGATACACACCACTGCATGT	ANK3	782	3154	1457	483	0	0	2	2542	0	1	1	0	1957	0	0	0	1360
4|CRko|sg_hANK3_04|ANK3	GGGGCCGTACACTTGCGTGG	ANK3	1734	2516	1225	1609	1	1	0	3	1	0	1360	10792	0	0	5143	0	1687
4|CRko|sg_hANK3_05|ANK3	GTAGCGCTTACGTAAAGCTA	ANK3	635	1363	1721	3219	1	1	0	0	0	1	0	0	1	1	0	0	1258
4|CRko|sg_hANK3_06|ANK3	ATTGGGGTAAGGCCCGACTA	ANK3	808	2260	1413	5103	0	0	0	0	0	4126	1	0	1	0	6166	1	1154
4|CRko|sg_hANK3_07|ANK3	AGATGGTGTAGACAACTTAA	ANK3	2831	1873	2266	206	1	1	0	1	0	1	2	0	0	2382	0	0	1042
4|CRko|sg_hANK3_08|ANK3	AAGAATTCGAGTGGGCCTCC	ANK3	861	611	2418	1789	0	0	1	0	0	0	0	0	0	2897	0	2	1407
4|CRko|sg_hANK3_09|ANK3	TGGAGAATGATAAACCATTC	ANK3	1050	1270	2627	3392	0	1	0	0	0	3329	1541	0	0	1	6885	0	1146
4|CRko|sg_hANK3_10|ANK3	TGAGCAGCAGGCTAAAGACT	ANK3	617	2371	1396	421	1	0	2	5278	0	3	889	1	0	1	0	1	1303
4|CRko|sg_hANKEF1_01|ANKEF1	CACCTTCATGAGAAAACCCG	ANKEF1	702	3017	1441	1222	0	0	0	0	0	0	0	0	0	0	0	0	1234
4|CRko|sg_hANKEF1_02|ANKEF1	CGATTGGTCCGTAGAACGTG	ANKEF1	2060	1930	4714	808	0	13986	0	2	3	1	944	10340	5667	2	2	1522	1341
4|CRko|sg_hANKEF1_03|ANKEF1	TTTAGATCATAAAACGCCCA	ANKEF1	797	1776	320	1234	0	1	1	862	2	0	0	0	1	0	1	6802	1090
4|CRko|sg_hANKEF1_04|ANKEF1	CAGCGATAATGCCGCTTAGT	ANKEF1	2155	3628	3139	4275	2642	1	1	21388	2244	4	2	1	6	1	4	4	1327
4|CRko|sg_hANKEF1_05|ANKEF1	AAAGCACTAAGTCCATTAAT	ANKEF1	1460	1187	546	2056	0	0	7356	5	1	0	666	0	0	40	4718	1	1173
4|CRko|sg_hANKEF1_06|ANKEF1	AGTTCTGCAGCCCTCATTGT	ANKEF1	1933	1469	4328	7242	1	1	2	2177	2055	1727	0	1	1	0	0	0	1454
4|CRko|sg_hANKEF1_07|ANKEF1	GGACCAATCGTGCAGTCTAA	ANKEF1	1178	1117	1101	4530	0	3	0	0	2259	1	955	1	0	881	6457	0	1380
4|CRko|sg_hANKEF1_08|ANKEF1	GCAGTCTGCAAAACCACCCA	ANKEF1	1501	2249	736	1006	771	0	1	0	1	0	1624	0	1	0	2	6789	1419
4|CRko|sg_hANKEF1_09|ANKEF1	GGGGTAGTGGAAATAGTTCG	ANKEF1	1250	901	1766	1	2	1	0	1198	0	0	423	0	0	0	3851	0	1251
4|CRko|sg_hANKEF1_10|ANKEF1	AGAAGCCAGATCCCCTGCTT	ANKEF1	1849	3218	4992	1704	0	0	1	0	1	2829	683	2	0	0	0	0	1544
4|CRko|sg_hANKRD13B_01|ANKRD13B	CTAGTGACACCTACAAAGTG	ANKRD13B	531	3124	2166	535	0	0	1	0	1	1	0	0	0	1	0	1679	1284
4|CRko|sg_hANKRD13B_02|ANKRD13B	GGTGTATGGGGCATCTAACG	ANKRD13B	765	1709	2640	588	2483	0	0	3789	1	0	1	0	0	0	0	0	1470
4|CRko|sg_hANKRD13B_03|ANKRD13B	GTCAAGCTGAGTGGTGACGA	ANKRD13B	2261	2255	4913	2281	1	10446	2	2	2158	657	1	0	0	2	0	0	1389
4|CRko|sg_hANKRD13B_04|ANKRD13B	TCTGGCAGACACAAGCGCCG	ANKRD13B	1677	2345	1457	1095	0	0	1	0	1	1	702	1	0	1	0	5074	1549
4|CRko|sg_hANKRD13B_05|ANKRD13B	ATGGGTATGAAGCTAAGGTG	ANKRD13B	783	940	3875	3340	5933	5	2	1	3	5177	2	0	8564	2	2	8566	1212
4|CRko|sg_hANKRD13B_06|ANKRD13B	GAGTCTCTGTGTACACCACC	ANKRD13B	389	3883	2938	1536	1	0	0	2438	0	1	0	0	0	0	1	0	1342
4|CRko|sg_hANKRD13B_07|ANKRD13B	CTGGCGCACGGCGCAGACGT	ANKRD13B	2096	698	5137	1145	0	0	0	0	2108	1	2	0	1613	0	7089	3194	1446
4|CRko|sg_hANKRD13B_08|ANKRD13B	TCGGTACCGGGACTACCAGC	ANKRD13B	1881	1439	2755	353	1	3	0	718	0	1383	4372	0	0	2	15363	2	1323
4|CRko|sg_hANKRD13B_09|ANKRD13B	ACGGCCATGAGGTCAATGAT	ANKRD13B	2145	1883	1624	2093	1	2	1	2	2	2	1	0	6169	1	0	0	1433
4|CRko|sg_hANKRD13B_10|ANKRD13B	GAGCTGGGCAACCGTGATAT	ANKRD13B	1440	297	1232	619	1	1	0	959	1473	4	1	0	0	3510	2	0	1494
4|CRko|sg_hANKRD13D_01|ANKRD13D	CATCTCAACGTAGAAATCGG	ANKRD13D	579	701	1177	329	1	0	2	2	0	3	694	0	29144	0	0	4558	1202
4|CRko|sg_hANKRD13D_02|ANKRD13D	CTTCGACACAATGCCAACGT	ANKRD13D	790	1675	4045	357	10149	4	2	3567	2864	6	1110	3	0	0	1	2	1443
4|CRko|sg_hANKRD13D_03|ANKRD13D	GCAGCATTCCTCCCACACCG	ANKRD13D	1806	1616	3069	1199	2657	0	0	0	1	1162	593	0	0	0	0	0	1479
4|CRko|sg_hANKRD13D_04|ANKRD13D	GGAAACTGTTAGCGGCTACG	ANKRD13D	1188	3957	2684	2143	5797	12934	0	3	2	1	1427	0	1	0	5	0	1528
4|CRko|sg_hANKRD13D_05|ANKRD13D	ACACGCGGTACACATCGCTT	ANKRD13D	1188	4691	2492	1291	0	1	1	1	0	1	0	0	0	4534	1	0	1420
4|CRko|sg_hANKRD13D_06|ANKRD13D	CCAGTATCGGGACTACCAGA	ANKRD13D	1799	2408	647	2355	5886	2	3383	1	2	3	1311	0	1395	0	2	1	1403
4|CRko|sg_hANKRD13D_07|ANKRD13D	CACATTACGAGTGTCCAGGT	ANKRD13D	1509	1899	4501	1280	1	5533	0	3	2287	2	0	0	0	2510	1	0	1419
4|CRko|sg_hANKRD13D_08|ANKRD13D	GCTGGTGACACGCACACGCA	ANKRD13D	1673	1948	607	2734	0	0	0	6258	13	0	1	0	1	2563	2	0	1700
4|CRko|sg_hANKRD13D_09|ANKRD13D	ATGGCCATTAGGTCGATGAT	ANKRD13D	1136	2581	1347	1294	1	0	1	0	1	0	0	1	0	7617	9752	1	1232
4|CRko|sg_hANKRD13D_10|ANKRD13D	AGCCTGGAGTCACGGAACAT	ANKRD13D	1550	2611	5175	4011	0	1	0	1	2362	1	3	10713	2	0	4911	1652	1415
4|CRko|sg_hANKRD28_01|ANKRD28	GTGATCGGGAGAATCTACCG	ANKRD28	1346	533	789	1499	0	0	0	0	0	0	766	0	0	0	0	0	1312
4|CRko|sg_hANKRD28_02|ANKRD28	TAAACGTATCTGATCGAGCA	ANKRD28	645	1261	2487	990	0	0	0	1752	0	2	0	0	0	0	7428	0	1110
4|CRko|sg_hANKRD28_03|ANKRD28	TAAGAAACGATGCAAATCCA	ANKRD28	1490	2349	860	0	1	0	0	2270	0	2	1142	0	0	2	0	0	1210
4|CRko|sg_hANKRD28_04|ANKRD28	TACGCTGATCATTCCACTAG	ANKRD28	369	1276	1	951	1634	1	0	0	0	315	1	0	0	2224	0	0	1186
4|CRko|sg_hANKRD28_05|ANKRD28	AGATAGGCGTGCTATCCATT	ANKRD28	747	1	721	131	0	1	0	1	4463	1	2	0	0	0	0	3463	1331
4|CRko|sg_hANKRD28_06|ANKRD28	TTAGCAGCAGCTATATGTAA	ANKRD28	2848	1539	3841	1600	3	0	3456	2	1	0	1	0	0	1	0	5431	1171
4|CRko|sg_hANKRD28_07|ANKRD28	GAATGCTTACGGCTATTAAT	ANKRD28	948	797	652	2237	0	2	1	5736	2512	1	741	1	1	0	6245	0	1211
4|CRko|sg_hANKRD28_08|ANKRD28	TGCATCTCCAAGGTAAGCTG	ANKRD28	602	2243	5028	373	5078	1	3	0	1	2	1	0	0	2313	1	1	1310
4|CRko|sg_hANKRD28_09|ANKRD28	GCAATCTGAAAAGCCGCTTA	ANKRD28	504	1608	4398	4256	1	1	0	2	1	0	785	0	0	0	2	1632	1321
4|CRko|sg_hANKRD28_10|ANKRD28	TTATAGCAGGCTACATGAAG	ANKRD28	2269	970	4038	301	1	0	0	1	0	446	1	0	0	0	6231	0	1139
4|CRko|sg_hANKRD40_01|ANKRD40	CGGGGAAAGGTCCCTAACAG	ANKRD40	696	2366	609	2498	5880	4	2	1	1	2	755	0	6520	2	3326	5850	1393
4|CRko|sg_hANKRD40_02|ANKRD40	GGCCTTAGGGGACATTCGGG	ANKRD40	2870	1493	590	1325	1224	0	0	2	2212	3742	1491	0	0	0	1	1	1527
4|CRko|sg_hANKRD40_03|ANKRD40	TAAACGAAACCATGGTCAGG	ANKRD40	1180	2202	2116	0	1	0	0	2	1	4	1	0	28448	3397	0	0	1286
4|CRko|sg_hANKRD40_04|ANKRD40	TATCTATACACCCACAGCAG	ANKRD40	826	568	574	191	1	0	0	1	2	0	1	0	0	0	0	8000	1230
4|CRko|sg_hANKRD40_05|ANKRD40	ATGTAAACGAAACCATGGTC	ANKRD40	978	920	825	1	0	1	1	1	4124	2	0	0	0	0	0	4840	1175
4|CRko|sg_hANKRD40_06|ANKRD40	TGAGGCTCCAGAGACATTGG	ANKRD40	341	2386	1004	1	0	0	0	0	0	0	0	0	1	0	4671	1607	1344
4|CRko|sg_hANKRD40_07|ANKRD40	ACACCAGAAAGCACAAAACC	ANKRD40	2305	414	4310	8	0	0	0	1	1	1	0	0	0	1	0	1617	1389
4|CRko|sg_hANKRD40_08|ANKRD40	CTGTGGGTGTATAGATAAAA	ANKRD40	0	774	1265	1	0	0	0	0	0	0	0	0	0	6224	0	4872	958
4|CRko|sg_hANKRD40_09|ANKRD40	CACCTCCCGAATGTCCCCTA	ANKRD40	1324	1430	1845	819	0	1	0	0	5651	1	734	0	0	3	5101	1	1441
4|CRko|sg_hANKRD40_10|ANKRD40	TAACATCAAGGAGAGAAATC	ANKRD40	3955	1186	3	1006	2	1	1	1	1905	2	0	0	1	3374	0	1518	1077
4|CRko|sg_hANKRD50_01|ANKRD50	ATTCCGTTATGGTCAAAGGT	ANKRD50	739	306	998	39	0	0	1	4461	2	1	1063	0	0	1	0	1906	1113
4|CRko|sg_hANKRD50_02|ANKRD50	GAAGGGTGTAACATTACTGA	ANKRD50	1698	1476	1812	1154	1	1	1	5133	1	5	0	1	0	2153	0	0	1208
4|CRko|sg_hANKRD50_03|ANKRD50	GGCTAGACAGGGACATACCA	ANKRD50	3994	1650	2064	6250	2	0	2863	2820	5241	6	2	0	9812	1	1	0	1505
4|CRko|sg_hANKRD50_04|ANKRD50	GTGGAACACCTACTGGACCA	ANKRD50	2330	1176	4591	1389	3388	1	4	2	1	4	0	0	0	8226	7162	0	1369
4|CRko|sg_hANKRD50_05|ANKRD50	TGAGGTGGTACGTACTCTAC	ANKRD50	43	987	768	3	435	1	0	3611	1	0	2002	3	0	0	1	0	1300
4|CRko|sg_hANKRD50_06|ANKRD50	TGACGATATATGCCTTCCGA	ANKRD50	1255	562	2984	639	0	0	0	0	0	0	0	0	0	0	0	0	1253
4|CRko|sg_hANKRD50_07|ANKRD50	TAGACAGGGACATACCAAGG	ANKRD50	2815	2261	1015	974	0	2	1	1947	2	0	1887	0	0	0	1	3118	1369
4|CRko|sg_hANKRD50_08|ANKRD50	TGATGGAAGAAATGCACTGC	ANKRD50	2357	872	1846	2542	0	0	0	0	0	0	0	0	0	0	0	0	1375
4|CRko|sg_hANKRD50_09|ANKRD50	AAGGATATGAGGACAAGCTA	ANKRD50	1332	2957	556	1551	8050	0	1	1	0	0	2478	0	0	1	1	0	1256
4|CRko|sg_hANKRD50_10|ANKRD50	GTAGAAAGGGAATCTCTGAC	ANKRD50	1795	2771	8327	2337	1	2	0	6	3	2	0	0	0	0	0	2	1309
4|CRko|sg_hANXA3_01|ANXA3	CTGAGAGGTCAAATGCACAG	ANXA3	1407	3867	4407	578	3330	2	1084	3	1	427	2	1	0	0	12277	0	1383
4|CRko|sg_hANXA3_02|ANXA3	GAATAGATTCTCTATAAAGC	ANXA3	2867	2524	1728	765	0	0	0	0	0	0	0	0	0	0	0	0	1084
4|CRko|sg_hANXA3_03|ANXA3	GAGGAAAGCTCCTTAAACAC	ANXA3	1694	2666	548	49	4380	1	1	1	0	0	1	0	0	1	0	0	1260
4|CRko|sg_hANXA3_04|ANXA3	TTTGCATCAAAGACTGCTGG	ANXA3	3838	1619	1732	942	1	0	0	0	2136	2526	0	0	0	0	1	0	1276
4|CRko|sg_hANXA3_05|ANXA3	TCCACTGATGGGCTAAAGTC	ANXA3	431	1044	1812	625	1	0	1	2	0	0	0	0	0	8096	0	0	1232
4|CRko|sg_hANXA3_06|ANXA3	TCAGTATACAAGAAGAGTCT	ANXA3	622	729	1424	896	1	0	2	2	1	2	1	0	5986	0	10	1	1091
4|CRko|sg_hANXA3_07|ANXA3	TCTGGCCAAACAAGATGCCC	ANXA3	654	1656	2308	1900	0	0	0	0	1	2091	0	0	1	3662	0	14412	1363
4|CRko|sg_hANXA3_08|ANXA3	GCAGCTAAAGAAATCCATGA	ANXA3	2227	3444	6638	6750	0	2	381	2	2	0	0	0	1	7089	1	8812	1407
4|CRko|sg_hANXA3_09|ANXA3	GGAGCTGAAAGATGACTTGA	ANXA3	564	598	4131	979	0	4575	0	0	2	3	2181	0	7	3377	1	1816	1307
4|CRko|sg_hANXA3_10|ANXA3	TCTTAACTACCAGGACAAGC	ANXA3	1898	1022	1069	2236	0	0	1	0	0	0	0	0	0	0	0	2107	1263
4|CRko|sg_hAP1M1_01|AP1M1	AAGTACTCGGAAAACACCTG	AP1M1	4	1939	1743	1	1	0	0	1	1695	1	936	0	0	3481	1	1400	1395
4|CRko|sg_hAP1M1_02|AP1M1	CATGAAACGGACCCCCCCGT	AP1M1	442	2469	3200	2725	1	1	0	3	1	1	2692	0	0	0	2	13952	1693
4|CRko|sg_hAP1M1_03|AP1M1	CCGGAACTACCGTGGCGACG	AP1M1	316	2629	7274	1254	2	1	0	0	2	1	1097	0	1	0	604	3940	1532
4|CRko|sg_hAP1M1_04|AP1M1	GTCCTGCGCAGCGAGATCGT	AP1M1	873	1305	4514	823	1	0	0	0	0	0	0	0	0	0	0	1	1527
4|CRko|sg_hAP1M1_05|AP1M1	CCAGCAAAGGGATACGATAC	AP1M1	496	1	0	2	0	0	0	5	0	4629	1151	1	8422	658	2	0	1407
4|CRko|sg_hAP1M1_06|AP1M1	CTGACATGTCCACGTCGCCA	AP1M1	3103	2560	1063	5634	0	1	1	0	0	0	0	0	0	2383	0	0	1436
4|CRko|sg_hAP1M1_07|AP1M1	ATGAGCTCGAACTCGCCGTC	AP1M1	15	2349	3	4510	2	0	0	1	4025	3871	685	0	0	0	5413	0	1484
4|CRko|sg_hAP1M1_08|AP1M1	GGTCCGAAGGCATCAAGTAT	AP1M1	1865	2582	3597	1438	4481	0	1	2	0	0	1	0	0	1808	5897	0	1397
4|CRko|sg_hAP1M1_09|AP1M1	GCCCCACAGGTACATCACTC	AP1M1	2508	1300	3200	1142	0	0	0	0	0	1	1713	0	0	1791	0	0	1480
4|CRko|sg_hAP1M1_10|AP1M1	AAGGTCCTCTTTGACAACAC	AP1M1	1686	960	454	576	0	3	0	2039	2196	1	685	0	0	0	0	6675	1227
4|CRko|sg_hAP1S2_01|AP1S2	ATCTGAAGATTGTTTACAAA	AP1S2	1291	2565	2376	911	3	3	3	11773	6	6	1012	0	1934	1	8	3	994
4|CRko|sg_hAP1S2_02|AP1S2	GGACAATGAACTAATTACCC	AP1S2	2086	1105	787	2733	0	0	0	0	0	1	211	1	0	2	0	0	1221
4|CRko|sg_hAP1S2_03|AP1S2	TCTTCAGATCTCGCCACTCA	AP1S2	472	2895	1502	3549	2	1	0	1	1838	1979	1764	1	0	15	0	17989	1318
4|CRko|sg_hAP1S2_04|AP1S2	TCTTCTCTTTGTCTGATAGT	AP1S2	2303	2278	1974	1065	1	0	1	1	0	1	715	0	0	0	0	1	1068
4|CRko|sg_hAP1S2_05|AP1S2	ATAACGATGAATTATTTCCA	AP1S2	293	1837	0	340	0	0	0	0	2695	1	0	0	1	0	1	0	1028
4|CRko|sg_hAP1S2_06|AP1S2	TGAGCAGGCTGATCTACTGC	AP1S2	3306	2887	1884	3042	1	1	2	6809	2	0	0	0	0	8902	0	4444	1477
4|CRko|sg_hAP1S2_07|AP1S2	TGTCCTTAAAGCAATTGAGC	AP1S2	66	2256	927	4456	1	0	0	1	0	0	1	0	0	1	107	0	1159
4|CRko|sg_hAP1S2_08|AP1S2	GCAGGCTGATCTACTGCAGG	AP1S2	3217	2203	3340	1289	3005	0	0	2	1865	3	2	1	9947	5027	1	2799	1378
4|CRko|sg_hAP1S2_09|AP1S2	TTTCTTCAAGAACACTACGT	AP1S2	0	2819	1133	2	1	1	1	0	1	4114	3	0	1	1	0	1	1174
4|CRko|sg_hAP1S2_10|AP1S2	ATTTCTTCAAGAACACTACG	AP1S2	1819	1901	769	1797	1	1	0	1	1356	1	0	0	0	1	0	0	1310
4|CRko|sg_hAP2S1_01|AP2S1	ATCCTCATCCAGAACCGGGC	AP2S1	200	449	1274	547	3259	1	1	2	0	0	965	0	0	0	1	1429	1344
4|CRko|sg_hAP2S1_02|AP2S1	CAAACACACCAACTTTGTGG	AP2S1	1	1478	0	795	1	0	0	1	1	1	1	0	0	0	4561	642	1389
4|CRko|sg_hAP2S1_03|AP2S1	GGCCATTCACAACTTCGTGG	AP2S1	159	1865	1447	2134	0	1	0	1	0	0	619	0	0	3214	1	0	1485
4|CRko|sg_hAP2S1_04|AP2S1	TGAGAAACAGAAGCTGATCG	AP2S1	3550	1120	1395	853	0	0	0	0	0	1	1	0	0	0	1997	0	1373
4|CRko|sg_hAP2S1_05|AP2S1	GGGCGTCACCTCCACAAAGT	AP2S1	1070	611	1598	3495	3528	2	4824	2	1	1	857	0	1	1	9068	2592	1400
4|CRko|sg_hAP2S1_06|AP2S1	AGTAGAGGCCAGCATAGCGG	AP2S1	0	0	0	0	0	0	0	0	0	0	0	0	0	0	0	0	139
4|CRko|sg_hAP2S1_07|AP2S1	ATCAAACTGCATGTACCACT	AP2S1	635	1063	2034	1	0	0	0	0	1	0	1	0	0	0	0	0	1296
4|CRko|sg_hAP2S1_08|AP2S1	GGATGTCAATGACAACAACC	AP2S1	669	2231	3552	691	5186	1	0	2	0	3013	0	0	0	0	0	1269	1404
4|CRko|sg_hAP2S1_09|AP2S1	CTTTATCCTCATCCAGAACC	AP2S1	0	217	657	471	0	1010	0	1	1795	0	0	0	1	22	0	2869	1167
4|CRko|sg_hAP2S1_10|AP2S1	GAAACAGAAGCTGATCGAGG	AP2S1	834	404	884	1629	0	0	0	0	0	0	0	0	0	1	6778	0	1431
4|CRko|sg_hAP3B1_01|AP3B1	ACATGCTAACTCGATATGCT	AP3B1	797	558	2423	1102	0	2	0	0	0	1	0	0	1	0	4788	7602	1197
4|CRko|sg_hAP3B1_02|AP3B1	GCAGACAGACCAAGCCATTG	AP3B1	1820	1510	5265	426	0	1	0	2	0	4102	1	0	2	3025	0	9254	1580
4|CRko|sg_hAP3B1_03|AP3B1	GGAATTATCTAATTGGCCAG	AP3B1	354	1799	1362	3	4	0	3	3	2	3	759	0	0	1	3407	3877	1265
4|CRko|sg_hAP3B1_04|AP3B1	TGCTATGAAGCGGATTGTTG	AP3B1	583	580	85	1	1	1	2	0	1	0	1	0	2	0	13785	0	1300
4|CRko|sg_hAP3B1_05|AP3B1	TCTGCCTATAGTCTGAATAG	AP3B1	1975	1824	3006	2913	1	0	0	1	3	1575	1	1	2	2585	1	10650	1156
4|CRko|sg_hAP3B1_06|AP3B1	ATTGTTCCGAATGTAAAGAG	AP3B1	1305	1405	610	796	0	1	1	1	2015	2	1232	0	5830	0	0	0	1016
4|CRko|sg_hAP3B1_07|AP3B1	GTTCTTCAGCATATCGAACC	AP3B1	1517	1328	1344	1824	3924	0	0	1	0	1	1	0	0	183	0	1	1157
4|CRko|sg_hAP3B1_08|AP3B1	AAATGTAGAAGTAATAGAGT	AP3B1	3	1443	1049	0	0	0	0	1	1	1	0	1	0	0	2	2801	990
4|CRko|sg_hAP3B1_09|AP3B1	TTTACTTCGTAGCAATAGGT	AP3B1	1093	540	504	152	0	0	0	7591	1	0	0	0	0	0	0	0	1015
4|CRko|sg_hAP3B1_10|AP3B1	CTGACTTATCACCATATGTT	AP3B1	1714	450	3430	2	2500	1	0	1	1	0	0	0	0	0	1	1127	1309
4|CRko|sg_hAP5Z1_01|AP5Z1	GAAGGGTGACAGAAACGAGG	AP5Z1	2260	5358	1443	4	1788	2	3831	4	2	1	2	1	0	1	6790	2893	1388
4|CRko|sg_hAP5Z1_02|AP5Z1	GCAGGTATTGGAAAAGACCC	AP5Z1	162	510	4372	4	402	0	2	2256	0	2	3589	1	0	3	10018	1	1334
4|CRko|sg_hAP5Z1_03|AP5Z1	GGAGAGACTTCGGTACAGGA	AP5Z1	1011	3949	466	552	7358	4	1	3593	2583	2	659	1	2	2298	2	1568	1442
4|CRko|sg_hAP5Z1_04|AP5Z1	TCCAGCACCGCCGTCAAGCA	AP5Z1	1998	3468	904	1731	4492	1	0	2391	3	6161	2	1	3863	1	1	15425	1351
4|CRko|sg_hAP5Z1_05|AP5Z1	AGAAGAAGCCGCCGGAGTGT	AP5Z1	498	3624	762	6362	878	0	1	1	3485	2289	758	0	0	2	5544	3705	1378
4|CRko|sg_hAP5Z1_06|AP5Z1	GCCGTCGCCACACTCACCTC	AP5Z1	994	1802	2947	4564	1	2	2508	1	1	0	2	0	2581	9072	2716	0	1485
4|CRko|sg_hAP5Z1_07|AP5Z1	TCTACCAGCACCTGTTCACC	AP5Z1	1795	1956	1642	1861	3641	1	0	1	0	2	0	0	0	0	1	4202	1433
4|CRko|sg_hAP5Z1_08|AP5Z1	GGGACCACACGCAGAACAGC	AP5Z1	2783	2752	2430	2856	0	0	1	0	1	1555	0	0	0	2	8413	1	1498
4|CRko|sg_hAP5Z1_09|AP5Z1	AATATACCTTAAAGAGGTTG	AP5Z1	2238	1552	3297	1853	0	1	0	2	1	582	1267	0	3944	3987	0	3	1158
4|CRko|sg_hAP5Z1_10|AP5Z1	GAGGCGCTGGCAGTACTCGA	AP5Z1	2166	4093	4666	295	1	0	0	0	0	0	0	0	1	0	1	3242	1447
4|CRko|sg_hAPEH_01|APEH	ATTATGTGGACCTCATCGGG	APEH	668	1688	4416	1454	5	1	5372	3	5	1	1558	2	1	0	2	0	1235
4|CRko|sg_hAPEH_02|APEH	CACAACATCTACCACCACTG	APEH	25	1385	3652	5780	4507	1	0	10350	3	4	0	0	1	0	2	1	1586
4|CRko|sg_hAPEH_03|APEH	GTACGGCGGCCAATACCGGA	APEH	3186	1674	2715	1570	3502	12853	1531	8	2109	5458	3147	2	0	761	9251	2	1459
4|CRko|sg_hAPEH_04|APEH	TTTGCTGTGGACACCCAAGT	APEH	538	2323	1853	1	0	0	0	0	2035	0	0	0	0	0	1	0	1155
4|CRko|sg_hAPEH_05|APEH	GCAGTATGACTGGTATACCA	APEH	895	3823	2553	2038	1532	1	0	3	0	1490	0	1	0	0	0	0	1251
4|CRko|sg_hAPEH_06|APEH	TATTATGTGGACCTCATCGG	APEH	749	522	2125	2141	4701	1	1	1	0	3	626	21825	0	4452	3	1	1152
4|CRko|sg_hAPEH_07|APEH	CCGAGTCAAAGACCACTCTC	APEH	519	1126	5541	1	1	2	1	3	0	0	1	2	0	3009	2	9542	1377
4|CRko|sg_hAPEH_08|APEH	GTGTGTCTCCGAGTGCGACC	APEH	1118	2238	2666	1709	0	0	2372	1	0	1	1	0	0	0	0	68	1441
4|CRko|sg_hAPEH_09|APEH	ACATCCAGCACGCAGAGCAC	APEH	2209	3306	1719	1208	4	13699	1	4	2218	7456	0	1	1	2	3634	1	1339
4|CRko|sg_hAPEH_10|APEH	GAAGTTGCTCACAATTGACC	APEH	3459	1987	1906	1112	1	1	3	0	0	0	641	0	0	2303	12283	0	1365
4|CRko|sg_hAPI5_01|API5	CTGGGGTAGTCAAGGTACCG	API5	1639	3841	3669	1025	0	0	1	3	0	1	0	0	0	0	27	0	1476
4|CRko|sg_hAPI5_02|API5	GCCTATCAAGTGATATTGGA	API5	1180	2639	3192	1975	2	16609	4	3385	1	1048	778	0	6	0	1	6456	1259
4|CRko|sg_hAPI5_03|API5	TCCACACAGTCAGGATCCGA	API5	653	1224	754	903	89	1	2	1	0	1138	658	0	0	0	4920	3	1294
4|CRko|sg_hAPI5_04|API5	TGCACAGTTAGACCTCTGTG	API5	1964	2937	1438	4	6182	1	0	1	0	464	0	0	12932	2	2	1	1442
4|CRko|sg_hAPI5_05|API5	ATATTGGATGGTGTGAAAGG	API5	598	172	1184	426	1	1	0	3	2	1	50	0	1	0	0	0	1131
4|CRko|sg_hAPI5_06|API5	GTCAGGATCCGAGGGATTGA	API5	1624	1505	178	570	3983	1	1	2102	1591	3	0	0	2	0	1	4891	1282
4|CRko|sg_hAPI5_07|API5	AATTGCTTGACGTCGAATCT	API5	856	1735	1440	1	0	7374	0	2	1	1	2	1	2	0	42	1	1028
4|CRko|sg_hAPI5_08|API5	GTAGTCAAGGTACCGAGGTT	API5	874	1624	3767	1259	0	4700	1	0	1	4111	818	0	1	0	2	2	1364
4|CRko|sg_hAPI5_09|API5	CAGTCACATCTTCTAGGACC	API5	1245	1957	4059	3667	0	4	1871	2	2	421	1474	0	0	0	4308	0	1262
4|CRko|sg_hAPI5_10|API5	CATGCCCCTCCCTCCAGAAG	API5	146	1762	6664	3101	0	0	1	2133	0	4	1605	11341	1	0	5015	2	1421
4|CRko|sg_hAPIP_01|APIP	AAAAGGAACGAATTCAGGTA	APIP	1382	1412	2984	409	1	1	0	2	2	1	1	8277	1	0	8208	1	1264
4|CRko|sg_hAPIP_02|APIP	AAAATACCTATAATACCCTC	APIP	400	2369	2825	2	1	0	1	3	0	0	0	0	0	0	2	0	1155
4|CRko|sg_hAPIP_03|APIP	GGAGGAATTAGCTTGAAGCA	APIP	3422	2011	7409	2630	0	2	0	1	1	1	1526	11204	0	1	0	0	1240
4|CRko|sg_hAPIP_04|APIP	TCATGAAAAGAGGAGTACAC	APIP	653	2024	538	541	0	0	3	3	2	7880	333	0	0	2683	0	1	1232
4|CRko|sg_hAPIP_05|APIP	GAGGAATTAGCTTGAAGCAT	APIP	3108	546	1927	3	44	2	0	2	0	1	2	0	1	3251	6493	7483	1283
4|CRko|sg_hAPIP_06|APIP	TCCCAGTGACCCAGCCTAAA	APIP	1274	1971	4	1191	0	0	0	0	0	1	0	0	0	1781	0	2361	1300
4|CRko|sg_hAPIP_07|APIP	CATCACAGCAGCTTTAGAGT	APIP	67	450	169	934	1	7	22604	3	2	7073	2	2	1	5081	0	2	1339
4|CRko|sg_hAPIP_08|APIP	AGTTCTGGGATCAGGTATCT	APIP	524	2740	1816	4510	4	7077	1	1	0	3	672	0	0	4851	2	6241	1174
4|CRko|sg_hAPIP_09|APIP	ATAAATGAAAAGGACATAAG	APIP	2027	1467	1050	3564	0	0	0	1	0	0	201	0	1	4972	0	0	1127
4|CRko|sg_hAPIP_10|APIP	GTACTTCCGGAGGGTATTAT	APIP	693	395	2496	1279	4565	0	0	1	1	0	760	0	0	0	0	0	1064
4|CRko|sg_hAPLP1_01|APLP1	AATGTGAGAGTTCAACCCGG	APLP1	1060	849	186	1314	1	0	0	4	1	2	0	1	0	1	7654	0	1322
4|CRko|sg_hAPLP1_02|APLP1	CCTGCCTAAAGCCGACAGAC	APLP1	419	937	957	3431	0	1	1	1	1	0	1429	6099	0	0	0	1944	1572
4|CRko|sg_hAPLP1_03|APLP1	CGCACGCAGGTAGCGCCGCA	APLP1	2474	3614	8470	2096	0	0	0	3	1	0	1	1	0	8099	0	1281	1529
4|CRko|sg_hAPLP1_04|APLP1	GGGAAATCAGTGAGCACGAG	APLP1	4238	4898	6224	1325	8665	1	1	1	5	2	3	9301	12857	2	1	4234	1447
4|CRko|sg_hAPLP1_05|APLP1	GTTGATAAGGGCGATGACGC	APLP1	1854	867	2934	498	1	1	0	0	1	1	1	0	0	3710	7754	0	1438
4|CRko|sg_hAPLP1_06|APLP1	TAGGATGCGCCAGATTAATG	APLP1	457	1890	2039	4543	0	1	0	934	0	0	667	0	0	0	0	0	1197
4|CRko|sg_hAPLP1_07|APLP1	TAAATATCCACACCGTCTGT	APLP1	482	761	2322	1697	0	1	0	624	0	197	1835	0	0	384	0	1535	1212
4|CRko|sg_hAPLP1_08|APLP1	GAGTTCAACCCGGAGGCATC	APLP1	948	2157	172	960	0	0	0	0	0	0	0	0	2428	0	0	1	1291
4|CRko|sg_hAPLP1_09|APLP1	ACGTGTGGAGCAGGCTACGC	APLP1	2701	2476	744	32	2401	0	0	0	0	0	1	0	0	0	1	0	1623
4|CRko|sg_hAPLP1_10|APLP1	TCCACGAAGTAATCATCTAC	APLP1	440	1980	2602	1679	2	2	1	2499	0	1	1591	0	0	2	0	1	1262
4|CRko|sg_hARF1_01|ARF1	AGGCTTCAACGTGGAAACCG	ARF1	1035	1197	2581	1532	3069	0	1	0	0	560	578	0	0	0	1	0	1349
4|CRko|sg_hARF1_02|ARF1	CACCCAGCTTAAGCTTGTAG	ARF1	1358	1181	6252	4	4	0	0	1393	1707	6415	1765	1	3	0	7142	7577	1320
4|CRko|sg_hARF1_03|ARF1	TGACAGAGAGCGTGTGAACG	ARF1	1821	3895	381	687	1	6294	340	1	1	1	0	0	0	0	8494	0	1356
4|CRko|sg_hARF1_04|ARF1	TGGAAGTAGTGGCGCCACAG	ARF1	652	1516	970	407	0	2	1941	0	0	1	0	0	0	1	0	1	1486
4|CRko|sg_hARF1_05|ARF1	GAAATGCGCATCCTCATGGT	ARF1	242	796	3883	7229	0	2	0	1	4	0	1	15646	1	1132	0	4736	1428
4|CRko|sg_hARF1_06|ARF1	AGCATCCCGGAGCTCGTCCT	ARF1	1500	2270	3064	1579	1	2	0	0	0	0	1827	1	0	0	0	2158	1472
4|CRko|sg_hARF1_07|ARF1	GGCAGGCCTGATCTTCGTGG	ARF1	1643	19	1131	793	0	1	1	2	2718	3378	0	0	0	2	0	0	1543
4|CRko|sg_hARF1_08|ARF1	GCTGATGTTCTTGTACTCCA	ARF1	1132	1716	1	86	0	0	0	0	0	0	0	0	0	0	4277	0	1373
4|CRko|sg_hARF1_09|ARF1	GATCCTCTACAAGCTTAAGC	ARF1	475	1463	355	6939	0	0	0	1	0	0	0	0	0	0	0	0	1252
4|CRko|sg_hARF1_10|ARF1	TCTGGAAGTAGTGGCGCCAC	ARF1	505	1278	4123	1098	0	0	2	0	0	0	4665	0	0	0	5862	2081	1440
4|CRko|sg_hARF5_01|ARF5	AAGCAGATGCGGATTCTCAT	ARF5	1242	1791	1323	446	6	10602	7	3777	1950	10993	1568	1	30629	1	85	6809	1219
4|CRko|sg_hARF5_02|ARF5	GTCACCACCATCCCAACCAT	ARF5	1602	1782	4111	25	0	1	2120	2	3	1	0	0	0	0	1	10204	1416
4|CRko|sg_hARF5_03|ARF5	TGCTGATGAACTCCAGAAGA	ARF5	661	1577	3986	2764	1	0	2	2	1859	0	726	1	1	0	13538	2783	1298
4|CRko|sg_hARF5_04|ARF5	TGTGGTGGACAGTAATGACC	ARF5	458	1610	411	0	2	0	0	1	3685	3002	856	0	0	2	1	0	1312
4|CRko|sg_hARF5_05|ARF5	TTGTGGTGGACAGTAATGAC	ARF5	1434	703	1332	2839	0	0	4012	0	2	1	0	0	0	402	0	1	1073
4|CRko|sg_hARF5_06|ARF5	TGGAAGTAGTGCCGCCACAG	ARF5	3744	866	6128	241	2415	12283	1	2	3	1	831	0	30377	2	1	2	1415
4|CRko|sg_hARF5_07|ARF5	CAGATTCTTGGACCCGCTCC	ARF5	1553	2441	637	845	0	5736	0	1	1	2	787	1	0	0	2	1	1429
4|CRko|sg_hARF5_08|ARF5	ACAGAGGCCGAATCTTGTCC	ARF5	3587	1170	1214	1611	1	1	1	0	2	0	1	0	1	0	9380	0	1423
4|CRko|sg_hARF5_09|ARF5	AACACTCCACCTGAGTGTTC	ARF5	1225	195	1982	1799	2963	11216	2	5	0	4156	1	0	3	2	1	4323	1114
4|CRko|sg_hARF5_10|ARF5	GGAGTTCATCAGCAGATTCT	ARF5	2931	1515	3887	272	1	1	1	3	1	6269	746	0	2	1729	2	3	1284
4|CRko|sg_hARF6_01|ARF6	CCTGGCGAGCCTCATCGATG	ARF6	1572	1792	5807	2765	0	1	0	1338	0	1	0	0	0	0	0	0	1539
4|CRko|sg_hARF6_02|ARF6	GAAACCCACAGTGGGAATGG	ARF6	1241	2960	4686	2	2	0	0	4	1	1738	1	0	1	8041	1	0	1439
4|CRko|sg_hARF6_03|ARF6	GTGTAGTAATGCCGCCAGAG	ARF6	1696	4096	3116	1587	0	8717	1	1734	2	465	2	1	1	3492	1	10230	1394
4|CRko|sg_hARF6_04|ARF6	GAGCCTCATCGATGCGGTCG	ARF6	1185	2207	3298	52	0	0	0	2509	0	0	1	0	0	2615	0	0	1560
4|CRko|sg_hARF6_05|ARF6	GAAATGCGGATCCTCATGTT	ARF6	1599	987	2040	310	0	0	2197	2	1	0	1	0	0	0	7369	4761	1349
4|CRko|sg_hARF6_06|ARF6	GTGACCACCATTCCCACTGT	ARF6	1031	316	0	0	1	0	1	0	0	1	0	0	1263	0	0	1	1555
4|CRko|sg_hARF6_07|ARF6	AAGTTCAACGTATGGGATGT	ARF6	0	393	396	363	1	0	1103	2	0	0	1	0	1	2255	0	4307	1203
4|CRko|sg_hARF6_08|ARF6	ATCCTGTACAAGTTGAAGCT	ARF6	544	2477	1361	1538	2	1	1	2	2714	0	1	0	0	1	2	3155	1260
4|CRko|sg_hARF6_09|ARF6	GCACCGCATTATCAATGACC	ARF6	2	1379	2	2551	0	0	0	0	0	1	1459	0	0	0	0	0	1448
4|CRko|sg_hARF6_10|ARF6	CATTACTACACTGGGACCCA	ARF6	958	1178	1110	788	1	0	0	0	1	0	881	0	1	0	0	1904	1302
4|CRko|sg_hARHGAP11B_01|ARHGAP11B	AAGAACATATTCATACCGAA	ARHGAP11B	2464	1942	1331	1652	4	1	0	2	1	5505	946	11277	0	1320	2	12181	1262
4|CRko|sg_hARHGAP11B_02|ARHGAP11B	AGCTCAACAGTTAGGCACAG	ARHGAP11B	3	5007	5958	4820	9626	4	2	18	5421	3	0	0	0	5070	1	2	1441
4|CRko|sg_hARHGAP11B_03|ARHGAP11B	AGTCCCGCAATATCACAAGG	ARHGAP11B	1078	1	362	2991	4	0	0	1	2	1	2614	1	0	0	7557	0	1480
4|CRko|sg_hARHGAP11B_04|ARHGAP11B	GTGCTTCATGCAAATCAGCT	ARHGAP11B	699	3526	2573	3031	0	1	0	0	1684	0	727	0	0	0	0	0	1128
4|CRko|sg_hARHGAP11B_05|ARHGAP11B	CAGAATATGGACACATTCCA	ARHGAP11B	584	2244	2415	130	2	2	1	5	3	6	1436	1	1	0	4612	0	1285
4|CRko|sg_hARHGAP11B_06|ARHGAP11B	GAATGGGGCAGTGCATTAAA	ARHGAP11B	1770	1597	2941	2064	6	6802	2	2482	4	2592	1	0	0	2820	0	2	1314
4|CRko|sg_hARHGAP11B_07|ARHGAP11B	TGTGTGGTCAGCCAGAAGAC	ARHGAP11B	1546	1989	2950	747	3515	3	2	1	2	2	3	1	0	0	0	0	1319
4|CRko|sg_hARHGAP11B_08|ARHGAP11B	TTAAGGTGAAGGGTGTCCGT	ARHGAP11B	766	1822	3825	1251	0	1421	0	0	2	1	1	1	0	2	0	1	1185
4|CRko|sg_hARHGAP11B_09|ARHGAP11B	GAAGAACATATTCATACCGA	ARHGAP11B	1500	2119	3978	4334	3	0	0	4774	0	1	800	1	0	0	0	0	1373
4|CRko|sg_hARHGAP11B_10|ARHGAP11B	ATATTCTGGTACAGCAGAAT	ARHGAP11B	0	2663	2465	501	0	1	0	0	0	0	817	0	0	0	0	0	1079
4|CRko|sg_hARHGAP27_01|ARHGAP27	AGACACGGGAGTTACCACCT	ARHGAP27	1375	938	2	1407	1	1	0	7	0	874	0	1	5003	0	11614	651	1427
4|CRko|sg_hARHGAP27_02|ARHGAP27	CCCCCAAAGACAAATCCAGT	ARHGAP27	1461	1412	1349	2062	2	1	0	1638	1	1	0	9508	0	4824	6200	0	1431
4|CRko|sg_hARHGAP27_03|ARHGAP27	GCTGACCAGTTACCCCGAGG	ARHGAP27	1578	689	1634	3407	0	0	0	1	1	1	2	0	1	1	11650	0	1616
4|CRko|sg_hARHGAP27_04|ARHGAP27	GGGCAGCTCCCATCGAACAG	ARHGAP27	74	1984	4617	3157	1	2	1	2425	1	3	0	1	9035	6957	0	5208	1522
4|CRko|sg_hARHGAP27_05|ARHGAP27	AGAAGTATGGCTTCCCGTGG	ARHGAP27	1551	653	5530	1108	1	0	1	3147	0	3	1503	0	16538	1	0	1763	1392
4|CRko|sg_hARHGAP27_06|ARHGAP27	GCTCACAAACCGGTAGTCGT	ARHGAP27	1054	1411	1394	2400	0	1	1	1565	3819	0	2658	0	1	0	0	1	1417
4|CRko|sg_hARHGAP27_07|ARHGAP27	TCGCGTACACGGGCTCCGGT	ARHGAP27	381	752	675	2462	546	2	0	1	0	161	163	0	0	0	0	2679	1260
4|CRko|sg_hARHGAP27_08|ARHGAP27	GGCGCAGGCCAGGTCGTTCA	ARHGAP27	2561	790	4080	940	3	2	1	2880	1	2	1752	0	0	0	1	0	1511
4|CRko|sg_hARHGAP27_09|ARHGAP27	GAGTACACAGTGGAGCTGAG	ARHGAP27	2362	1553	3068	3436	1	0	0	0	1	0	0	0	0	0	1	5699	1480
4|CRko|sg_hARHGAP27_10|ARHGAP27	TTAGACCAAGACCTTGGACA	ARHGAP27	1687	3577	3466	0	2536	0	0	0	0	0	2	0	0	0	0	0	1277
4|CRko|sg_hARHGAP35_01|ARHGAP35	AAATGTATGAGCTTTCCCTG	ARHGAP35	2535	3257	1751	5670	2	0	1	3464	1	1	276	0	0	0	2	0	1290
4|CRko|sg_hARHGAP35_02|ARHGAP35	AGCATGAGCATATCGAGCGT	ARHGAP35	1444	2554	2909	3337	3	5852	0	3880	2161	7091	694	0	1	2	5961	2	1574
4|CRko|sg_hARHGAP35_03|ARHGAP35	CAACTCATTGATAAAAGTCG	ARHGAP35	1248	1155	1498	18	2481	1	0	1	2	830	0	1	0	0	0	3615	1152
4|CRko|sg_hARHGAP35_04|ARHGAP35	TATGTACGATAATGCTGCCG	ARHGAP35	1062	2196	807	6162	1	1	0	0	3779	1	959	0	0	1	0	6842	1253
4|CRko|sg_hARHGAP35_05|ARHGAP35	TCTTAGCGTCCACACAAGCT	ARHGAP35	1522	1627	1379	90	0	0	1953	0	1	0	838	1	0	0	0	0	1292
4|CRko|sg_hARHGAP35_06|ARHGAP35	GGAATCGCTATCCTATGTAG	ARHGAP35	534	1966	1457	2	4	2	2	1	1609	1728	1	0	0	2955	7945	8350	1205
4|CRko|sg_hARHGAP35_07|ARHGAP35	TGAGTGCTACAAGCTGAATA	ARHGAP35	1892	3148	5293	3212	0	0	1	2	1	1571	1474	1	0	3546	0	3	1267
4|CRko|sg_hARHGAP35_08|ARHGAP35	GGAGTTAAACACCTCTTCGG	ARHGAP35	2324	1972	2168	81	0	0	0	0	0	0	748	0	0	0	0	0	1373
4|CRko|sg_hARHGAP35_09|ARHGAP35	GCTGGAGGAATCTGTATACA	ARHGAP35	2	2434	2594	3700	0	0	0	0	0	0	1125	1	1	0	0	4174	1223
4|CRko|sg_hARHGAP35_10|ARHGAP35	GCAGCAGCTCTCTTGATATA	ARHGAP35	1346	1978	3884	1055	2	2	1	2	1	6037	649	1	0	2	2	13754	1198
4|CRko|sg_hARHGAP42_01|ARHGAP42	AAAGGAGTCTCATTTACAAG	ARHGAP42	1476	1299	1005	5790	0	1	1	0	0	1	699	0	10894	1	0	2473	1189
4|CRko|sg_hARHGAP42_02|ARHGAP42	GTTTCTGTTTACTTAAGACA	ARHGAP42	2	2617	3524	1108	4214	0	0	1	3671	1	0	0	0	0	1	5668	965
4|CRko|sg_hARHGAP42_03|ARHGAP42	TGATGATCAAAACTACAGGG	ARHGAP42	1517	1728	1699	2227	0	0	0	1	3956	0	824	0	0	0	0	3	1207
4|CRko|sg_hARHGAP42_04|ARHGAP42	TTAGGACTCTACCGAATAGG	ARHGAP42	451	1132	2680	1	0	0	1	2	0	1	2	0	20726	0	0	3	1193
4|CRko|sg_hARHGAP42_05|ARHGAP42	TGGAGTTCACTCCTCCTATT	ARHGAP42	1522	639	2178	1	3654	0	0	2	0	3077	1024	0	0	1	1	0	1214
4|CRko|sg_hARHGAP42_06|ARHGAP42	AAGGATGAAATCTGCTAACC	ARHGAP42	747	4020	2352	781	0	2	0	3	2	8392	463	1	7758	1	0	0	1243
4|CRko|sg_hARHGAP42_07|ARHGAP42	CCCAACTCTAATGAGAGCAC	ARHGAP42	574	1320	2862	1249	1	1	6528	2325	2	2	1	0	0	2763	3025	1	1316
4|CRko|sg_hARHGAP42_08|ARHGAP42	TACCGGTTCCTTCCCATCCA	ARHGAP42	568	453	2151	4130	3	0	0	0	0	0	1	1	0	0	8692	2805	1247
4|CRko|sg_hARHGAP42_09|ARHGAP42	AGAAGAAGAAAGGCGAAGAC	ARHGAP42	200	1196	1992	308	0	0	0	1	0	0	0	0	0	0	0	0	1355
4|CRko|sg_hARHGAP42_10|ARHGAP42	AAGGACGGCTCTCTGCTCAT	ARHGAP42	3446	4263	2814	793	3	4867	2	6926	5409	2	1741	0	197	4208	3	2	1355
4|CRko|sg_hARHGEF16_01|ARHGEF16	AGACGCTGGGGAGGAAACGT	ARHGEF16	1948	3676	1073	1281	0	0	1	0	0	1	3104	0	0	0	0	0	1359
4|CRko|sg_hARHGEF16_02|ARHGEF16	CATGTTCGAGATCCTCACGT	ARHGEF16	1970	1	2317	779	1	0	0	39	637	1	1	0	0	0	0	1581	1402
4|CRko|sg_hARHGEF16_03|ARHGEF16	GAAGGTGGACGCCACCATTG	ARHGEF16	2051	600	1534	471	6209	2	694	1	3	3	0	1	0	2747	4303	2418	1483
4|CRko|sg_hARHGEF16_04|ARHGEF16	GCGGAACCAATCCTACCGGG	ARHGEF16	1800	1549	7029	931	4	1	0	2	2	1	1519	0	0	2697	7925	0	1603
4|CRko|sg_hARHGEF16_05|ARHGEF16	GCGCTGTTGGTAGACCTCGT	ARHGEF16	1219	1335	492	2	2	1	1	0	3652	2	2	0	13066	1	6202	1	1467
4|CRko|sg_hARHGEF16_06|ARHGEF16	GTACAGCCGCCCCGAAGCTC	ARHGEF16	2072	3017	4143	15	1	0	0	4236	0	1	0	2	3	4892	0	1	1378
4|CRko|sg_hARHGEF16_07|ARHGEF16	GTGGACTTACATCCATCAGG	ARHGEF16	1892	2372	4366	411	1	0	2949	4555	2	0	2	1	3	2	0	0	1388
4|CRko|sg_hARHGEF16_08|ARHGEF16	CCGGTAGCTCTTGACCACAA	ARHGEF16	903	3587	1365	323	1	7470	0	1868	0	0	1	0	1	1	1	1	1375
4|CRko|sg_hARHGEF16_09|ARHGEF16	ATGTCCTGGGTGCCAGTCAG	ARHGEF16	1076	3775	3358	3470	1	1	0	1	0	1	2	1	0	3065	7689	0	1432
4|CRko|sg_hARHGEF16_10|ARHGEF16	TCTAGACCCCCAGCTCTACC	ARHGEF16	668	730	3122	6190	3	2	251	5825	2	1	1378	1	0	7552	3987	5008	1474
4|CRko|sg_hARHGEF19_01|ARHGEF19	CAGGATATCCCCGACGTACG	ARHGEF19	2054	1476	654	696	0	1	0	1917	0	0	759	0	0	2087	1	0	1508
4|CRko|sg_hARHGEF19_02|ARHGEF19	GATACAGAGATCACCAGCGG	ARHGEF19	0	2589	647	1487	0	0	2	0	2	3666	1188	0	1	2893	0	0	1533
4|CRko|sg_hARHGEF19_03|ARHGEF19	GCGGGTGTACCAGCGTGAAG	ARHGEF19	1336	1155	4816	4193	4	3193	2	1940	6696	1	2	0	3905	0	0	0	1531
4|CRko|sg_hARHGEF19_04|ARHGEF19	GGTCCAGGAGCACCAACGAG	ARHGEF19	2222	1196	1222	1854	7145	1	1081	4	1	3	6094	2	1	3	8119	7287	1552
4|CRko|sg_hARHGEF19_05|ARHGEF19	GGAAAAGGTCCAGACACACT	ARHGEF19	2495	3502	1578	1353	3	13025	2429	3	2650	3	0	3	34715	1	4750	782	1394
4|CRko|sg_hARHGEF19_06|ARHGEF19	TAGGCCTGGTTGGTGACATA	ARHGEF19	939	2180	1363	376	0	2	0	1	4769	0	0	0	0	0	0	0	1210
4|CRko|sg_hARHGEF19_07|ARHGEF19	AGGCTCTAGGAAGACAGCGT	ARHGEF19	944	1938	564	2032	2	2	0	4305	0	1	1661	0	3994	0	5394	0	1488
4|CRko|sg_hARHGEF19_08|ARHGEF19	GCTCGGCAGAGCCTAAGAAG	ARHGEF19	919	1133	632	1407	1	2	0	3	1	3389	2212	0	7019	0	6523	8682	1220
4|CRko|sg_hARHGEF19_09|ARHGEF19	AGATACAGAGATCACCAGCG	ARHGEF19	720	1583	3768	549	1	1	1	0	2	3	21	0	2379	0	0	3814	1488
4|CRko|sg_hARHGEF19_10|ARHGEF19	TCCTCTGGAAGGGCAGGATA	ARHGEF19	381	1755	3172	1531	1	0	1	0	0	0	1695	0	1	0	0	5325	1188
4|CRko|sg_hARID1A_01|ARID1A	CACATCCCTGACCCAACCTG	ARID1A	727	2472	2974	298	0	6701	764	1	1	2	0	0	0	1	1	0	1551
4|CRko|sg_hARID1A_02|ARID1A	CAGCAGAACTCTCACGACCA	ARID1A	3633	3361	2097	2100	6443	2	2058	2597	2	2	0	0	2	2	5764	0	1418
4|CRko|sg_hARID1A_03|ARID1A	CCTGTTGACCATACCCGCTG	ARID1A	1626	2509	4329	5976	3	1	0	1	6721	4	1	0	15286	0	0	2	1529
4|CRko|sg_hARID1A_04|ARID1A	TTTGAATGCAAGATTGAACG	ARID1A	1674	1176	2856	1272	0	1	0	1	0	0	282	1	1467	1	3808	0	1247
4|CRko|sg_hARID1A_05|ARID1A	AGCGGGATCAGGATCTATGC	ARID1A	704	622	1128	115	1	0	0	2	1	1	3097	0	1	0	0	5133	1433
4|CRko|sg_hARID1A_06|ARID1A	GGAAGGCTGACGCGGAGATA	ARID1A	600	2118	186	1749	2	1	0	7137	2	2	1	0	9092	0	9738	1566	1462
4|CRko|sg_hARID1A_07|ARID1A	TATGGGTTAGTCCCGCCATA	ARID1A	2722	327	2172	127	1	1	0	0	3	1	0	11196	1	0	0	4820	1209
4|CRko|sg_hARID1A_08|ARID1A	CAATAGATGACCTCCCCATG	ARID1A	104	1485	1582	3844	0	0	0	0	0	501	0	0	0	0	1	0	1379
4|CRko|sg_hARID1A_09|ARID1A	CAGGATAGGCATTGCCATAC	ARID1A	1157	754	583	1	1	0	1	2669	0	1	3184	0	1	0	0	18526	1396
4|CRko|sg_hARID1A_10|ARID1A	GCAGCCAGCCCAGAGATGAT	ARID1A	1463	2782	2875	53	1	2	1	5957	1	0	834	0	1936	0	0	2308	1423
4|CRko|sg_hARID4B_01|ARID4B	ATAAACTAACAGATGCGAGT	ARID4B	7	2107	1567	681	0	1	1	0	0	1	0	0	0	0	0	0	1009
4|CRko|sg_hARID4B_02|ARID4B	CAAAGATGATGACACAACTA	ARID4B	1	3	620	594	1	1	1	1	5015	2	0	0	1	2571	0	2	1362
4|CRko|sg_hARID4B_03|ARID4B	CAGGCATGAAAGTCCAAGTG	ARID4B	694	881	5343	2170	0	0	0	1	1	0	0	0	0	0	0	0	1503
4|CRko|sg_hARID4B_04|ARID4B	CATGGATAATAATGGCAAAG	ARID4B	1512	950	1044	3590	7946	2	1	4	2019	1845	2	3	3	4942	4	3079	1253
4|CRko|sg_hARID4B_05|ARID4B	GATGCGAGTTGGTACACTGT	ARID4B	1525	739	1692	1084	1	2	0	3	1	0	431	1	1	5395	7128	2	1399
4|CRko|sg_hARID4B_06|ARID4B	AGTACAGGTCGTTTGTTAAT	ARID4B	1668	999	3	4518	2	3654	3	1981	3	0	2	0	5	1	2	0	1136
4|CRko|sg_hARID4B_07|ARID4B	GCAATCTCATCACTACAATC	ARID4B	355	2166	2200	2128	1	6006	1	0	2	1887	163	0	0	3	4871	3	1308
4|CRko|sg_hARID4B_08|ARID4B	ACAGAAGAGTGTCTAAAAAC	ARID4B	2	769	2202	443	0	1	0	2	1842	0	0	0	1	3856	0	1	1181
4|CRko|sg_hARID4B_09|ARID4B	AAGGATCGAAGTAATTTCTA	ARID4B	1233	2414	1428	819	5005	0	1	0	0	0	753	0	1	4270	2	2	1027
4|CRko|sg_hARID4B_10|ARID4B	TATACCTACACATTCTGATC	ARID4B	1191	1426	3023	12	0	0	0	1	1	0	0	0	3894	0	0	0	1115
4|CRko|sg_hARL6IP6_01|ARL6IP6	AATACGATGGCCGAGCCACA	ARL6IP6	1190	1312	3823	2	1	0	0	1923	0	0	1	0	0	1	0	1	1561
4|CRko|sg_hARL6IP6_02|ARL6IP6	GCAGCGAGCAGAGAATAGAG	ARL6IP6	1353	2331	2412	4	21	1	3	2442	3	5	704	0	7507	0	2293	1	1393
4|CRko|sg_hARL6IP6_03|ARL6IP6	GGAGGAGGGATGCGACCAAG	ARL6IP6	1822	2983	5354	739	2272	1	0	2268	0	0	1	0	0	5	8863	0	1529
4|CRko|sg_hARL6IP6_04|ARL6IP6	TTTAACGATCAAGTAGGCGA	ARL6IP6	1	1336	647	3917	2	0	0	0	0	0	612	0	0	0	0	0	1130
4|CRko|sg_hARL6IP6_05|ARL6IP6	AATACCTTTAACGATCAAGT	ARL6IP6	1685	314	0	2	1	6240	0	0	1	2	1143	0	0	1	0	1	1129
4|CRko|sg_hARL6IP6_06|ARL6IP6	GTTCTGCCCGATAAGCGCAA	ARL6IP6	329	1371	1531	3454	5088	2	1	1	0	1	3	0	0	0	15003	0	1315
4|CRko|sg_hARL6IP6_07|ARL6IP6	CAGCCGAGAACTCCGCCCGC	ARL6IP6	340	1763	2518	8299	5929	1	0	4	2	1	799	0	1	1	0	1	1621
4|CRko|sg_hARL6IP6_08|ARL6IP6	GTCAGAGCCCAGAAAGCGCT	ARL6IP6	92	1691	4593	965	5249	1	1	5	11	2	0	21286	0	2640	1	2800	1427
4|CRko|sg_hARL6IP6_09|ARL6IP6	AATGAAGATGATGTAGACAC	ARL6IP6	1466	2382	1433	187	4	1	7027	6	3	1	1	0	0	1	1	0	1310
4|CRko|sg_hARL6IP6_10|ARL6IP6	TGAGTAAAGGAGGAATACGA	ARL6IP6	2044	2660	2459	3212	0	0	0	0	0	0	714	0	0	0	0	0	1208
4|CRko|sg_hARMT1_01|ARMT1	AAAGTGATGGAAAATCAAGA	ARMT1	1047	2226	1269	765	0	2	2	3	1964	1	1540	0	0	233	1	0	1035
4|CRko|sg_hARMT1_02|ARMT1	AATACCACAGATCTTAACTA	ARMT1	303	2017	1903	3593	0	1	0	1	0	2	279	0	0	0	0	2	1062
4|CRko|sg_hARMT1_03|ARMT1	ACATCAAAGTAATCGATTGG	ARMT1	821	3096	2668	2107	181	0	5976	1	2	4	2	0	0	0	1	0	1239
4|CRko|sg_hARMT1_04|ARMT1	CAACAAATTTCTCAACCAAG	ARMT1	1072	4376	1407	326	2	5	6122	2405	2	754	441	1	0	8363	1	5758	1261
4|CRko|sg_hARMT1_05|ARMT1	GATGATTACACACGTACCTC	ARMT1	985	636	3297	8	0	0	0	1	3314	2190	1070	0	0	1	0	6693	1353
4|CRko|sg_hARMT1_06|ARMT1	AGATAAACCATTTATCCCCT	ARMT1	1862	2519	2309	1265	1	1	0	3488	3739	1	1	2	1	0	6355	4239	1258
4|CRko|sg_hARMT1_07|ARMT1	GTAGTATCAGAAACAAACCA	ARMT1	930	1754	4286	848	5	6214	0	6	4	3	2	0	1	0	7	1	1102
4|CRko|sg_hARMT1_08|ARMT1	GTGAGTACATAAAGCAATGA	ARMT1	1746	1095	95	661	5229	0	0	1	3233	1	141	0	0	0	2	2	1171
4|CRko|sg_hARMT1_09|ARMT1	TGTGATCTGTCTCTCTCAGG	ARMT1	1559	0	999	2280	1	0	0	1	0	2444	0	0	0	2837	0	1	1342
4|CRko|sg_hARMT1_10|ARMT1	TGAATGATATGGAACATCTT	ARMT1	241	1497	4434	2578	1	1	1	1	3390	1943	1680	1	1	2	0	5664	1167
4|CRko|sg_hARNTL2_01|ARNTL2	ATAGCCAAACTGAAAAGCGG	BMAL2	1946	2939	3215	885	0	1	0	0	1737	0	0	8858	1	1	0	0	1389
4|CRko|sg_hARNTL2_02|ARNTL2	GGACAAGACCAACAGCTATG	BMAL2	3367	2187	5217	2351	2	5548	2	3	2	1	2	0	1	2	8379	0	1448
4|CRko|sg_hARNTL2_03|ARNTL2	GGCTTGACAAATTCTTATGT	BMAL2	636	2266	5469	308	0	0	0	0	1927	3835	1	1	0	3	0	1	1202
4|CRko|sg_hARNTL2_04|ARNTL2	TTGTTGAAAGAAGATAGGTA	BMAL2	980	1529	212	2692	2	5366	0	1	1	3	1	1	1476	0	0	4433	1022
4|CRko|sg_hARNTL2_05|ARNTL2	TATGAATAGGCTAGTTTGAC	BMAL2	2163	2081	2050	1	0	0	0	0	2	0	0	0	0	0	0	949	1160
4|CRko|sg_hARNTL2_06|ARNTL2	GTTGAAAGAAGATAGGTAAG	BMAL2	1494	1215	2105	4211	4745	2	1	2	0	2	0	0	0	4663	3	1	1194
4|CRko|sg_hARNTL2_07|ARNTL2	TTCTATACTATCCATTGCAC	BMAL2	1989	2099	3007	1	1	0	1	0	4150	0	848	0	0	2918	1	4889	1161
4|CRko|sg_hARNTL2_08|ARNTL2	AATTTGTCTATGTAGATCAA	BMAL2	1756	2510	2704	183	1	1	1	2	0	2	1807	0	0	2994	8314	4196	981
4|CRko|sg_hARNTL2_09|ARNTL2	ATATGGCTGTAATCTTCCAA	BMAL2	409	1300	3809	1123	2302	0	0	2	1	1	2	0	0	3711	0	4735	1142
4|CRko|sg_hARNTL2_10|ARNTL2	GTTCACAGTAATCTCCACGC	BMAL2	1658	1236	1425	391	1	0	1	0	1	0	0	0	0	0	1	0	1326
4|CRko|sg_hARPC1A_01|ARPC1A	CAGCAAATTTGTTCTCTAGG	ARPC1A	2961	2633	2417	1033	1	0	1	4	0	1	1498	0	1	2	8737	15558	1207
4|CRko|sg_hARPC1A_02|ARPC1A	CATGTGACTTCAAATGCAGG	ARPC1A	2038	1902	5510	199	8718	1	1	3019	1	3	1	9509	1	1892	5381	5882	1290
4|CRko|sg_hARPC1A_03|ARPC1A	GAGCACAACGGACACATCAC	ARPC1A	4848	2663	1281	1901	2	1	0	1	2438	0	849	0	0	3348	0	0	1578
4|CRko|sg_hARPC1A_04|ARPC1A	TGGTGTTTGGAAGCCAACCC	ARPC1A	375	1215	0	986	1	2	0	3	1	1	82	0	26788	3586	0	0	1331
4|CRko|sg_hARPC1A_05|ARPC1A	GCTGCCAGCAAAACGTTGTT	ARPC1A	405	2203	2719	5159	0	1	0	1797	1668	0	0	0	0	1	4899	1	1441
4|CRko|sg_hARPC1A_06|ARPC1A	TTGGGACTGAGGGCAATCTC	ARPC1A	754	1856	2695	974	2	1	1	0	0	1	913	0	0	0	1	0	1342
4|CRko|sg_hARPC1A_07|ARPC1A	AAAGGCATCTTGCTGCCCCA	ARPC1A	424	2429	4185	311	1	0	0	0	1	0	1165	1	0	0	4905	0	1427
4|CRko|sg_hARPC1A_08|ARPC1A	TGGCAGAGAAGCTTACCCCG	ARPC1A	3258	2966	3674	797	5345	3	1	5079	2	0	3	0	2	1	4474	0	1442
4|CRko|sg_hARPC1A_09|ARPC1A	TGAGGCATCAGCAACAGACA	ARPC1A	1045	522	4438	745	1	1	0	3	1	1	1576	1	7908	1	5766	0	1413
4|CRko|sg_hARPC1A_10|ARPC1A	TAGCTGCGCGATTAATTCTC	ARPC1A	1319	762	3	965	0	0	0	0	1	0	588	0	72	0	0	0	1215
4|CRko|sg_hARPC1B_01|ARPC1B	AGTAACCGTATTGTGACCTG	ARPC1B	2	2237	165	1992	4731	0	0	3717	2	3	2	0	0	0	12122	6847	1353
4|CRko|sg_hARPC1B_02|ARPC1B	GAGCGGTGCCAAATGGACCA	ARPC1B	1342	2574	4212	2706	2	1	1	2555	0	0	932	1	2344	3471	12781	1	1467
4|CRko|sg_hARPC1B_03|ARPC1B	GCTCCTGTGACTTCAAGTGT	ARPC1B	1558	2097	1186	1153	3104	0	0	2	2	2	873	0	2207	1	0	0	1403
4|CRko|sg_hARPC1B_04|ARPC1B	GGTCATCCTGCGGATCAACC	ARPC1B	2139	1291	2740	1846	1	0	1	1	2	1	1	0	9369	3	0	6031	1450
4|CRko|sg_hARPC1B_05|ARPC1B	CAGACCGCAACGCCTACGTG	ARPC1B	1856	1089	3792	498	1	0	0	4902	2	1	0	1	1	1	7107	4354	1651
4|CRko|sg_hARPC1B_06|ARPC1B	TCGAGCAGGAGAATGACTGG	ARPC1B	1899	3263	420	246	1	1	1	1	1	2	0	0	0	2839	3774	0	1395
4|CRko|sg_hARPC1B_07|ARPC1B	GGTGCTGTCGTGGCTTACCC	ARPC1B	1078	583	2	1090	1	1	0	0	0	1464	0	1	3117	0	1	0	1363
4|CRko|sg_hARPC1B_08|ARPC1B	GTCACAATACGGTTACTCTC	ARPC1B	1783	5	3660	563	1	0	0	1495	2076	2	1	0	0	0	1	0	1291
4|CRko|sg_hARPC1B_09|ARPC1B	ATCCGCAGGATGACCAGCGT	ARPC1B	1052	1282	5168	514	1	0	1	1	1	8646	0	0	1	1	1	2	1558
4|CRko|sg_hARPC1B_10|ARPC1B	TCACCGACACTTGAAGTCAC	ARPC1B	719	2514	556	63	8340	0	2	3	2	0	2155	1	0	6654	0	2	1354
4|CRko|sg_hARPC3_01|ARPC3	ATTGCGTTAAGTGGAAAACC	ARPC3	0	500	96	663	0	1	0	2026	1	1	0	7526	0	0	0	1	1134
4|CRko|sg_hARPC3_02|ARPC3	GAGAAAGAAATGTATACGCT	ARPC3	0	325	1033	914	3508	0	0	0	1563	4	0	0	1	1	0	0	1309
4|CRko|sg_hARPC3_03|ARPC3	GATCCTGATACCAAACTCAT	ARPC3	1383	2193	5	1809	0	0	1	2	1	9309	743	1	0	1	0	1	1239
4|CRko|sg_hARPC3_04|ARPC3	GTTTAGACTTACTCTCTCTG	ARPC3	459	1048	921	1	0	1	1	1	2	1	1572	0	5841	4088	4499	8204	1231
4|CRko|sg_hARPC3_05|ARPC3	ATTGGCCTTGAAGTAATAGA	ARPC3	479	765	438	1	0	0	0	0	0	0	0	0	0	0	0	0	931
4|CRko|sg_hARPC3_06|ARPC3	TGAGAAAGAAATGTATACGC	ARPC3	390	114	2	2	2986	0	2	1	0	692	0	0	0	0	1	0	1215
4|CRko|sg_hARPC3_07|ARPC3	GTAGAGAGTTATATATATCA	ARPC3	830	115	1317	0	3	1	0	2	1	5258	843	0	0	2313	10774	0	971
4|CRko|sg_hARPC3_08|ARPC3	TCAGAATGATAAACCCAGCA	ARPC3	1936	850	887	277	0	1	0	0	0	2	0	5074	0	1	0	0	1215
4|CRko|sg_hARPC3_09|ARPC3	GAAGAGGGTCTTACCTTGCT	ARPC3	1272	855	5522	867	0	1	1	1	0	0	1546	0	0	1	5640	1	1393
4|CRko|sg_hARPC3_10|ARPC3	TCGAACCCTCACCGGCATCT	ARPC3	890	1389	1263	595	5874	1	2	2109	2	1	1339	1	0	0	738	1	1333
4|CRko|sg_hARPC4_01|ARPC4	GCCCCTACCTGAGTGCCGTG	ARPC4	1651	1	1702	467	3728	0	439	2	0	0	0	0	2	1	9570	1	1466
4|CRko|sg_hARPC4_02|ARPC4	GTGTCGTTCCACAACCTGGG	ARPC4	450	359	1408	1	1	0	0	1	3330	1	0	0	0	1	0	1	1383
4|CRko|sg_hARPC4_03|ARPC4	TATCCTTCGAAGGAAGCCTG	ARPC4	0	596	1027	778	499	0	1	0	0	0	0	0	0	0	0	0	1203
4|CRko|sg_hARPC4_04|ARPC4	TTCTCGATCTCATCAGCCTG	ARPC4	1204	1	1932	5737	0	1	1	0	1	1571	0	0	0	2810	0	1810	1384
4|CRko|sg_hARPC4_05|ARPC4	ACAAGCCGGAAGTGGAAGTC	ARPC4	3568	726	3486	1	4357	0	0	0	2105	0	0	1	0	0	0	0	1488
4|CRko|sg_hARPC4_06|ARPC4	GTTGTGTCGTTCCACAACCT	ARPC4	293	506	2502	976	1	2	0	1	0	1	2012	0	0	1	0	0	1255
4|CRko|sg_hARPC4_07|ARPC4	GTTTCACAGCAATGCTGACC	ARPC4	1315	633	622	990	0	1	0	0	2178	2658	0	0	0	0	0	0	1286
4|CRko|sg_hARPC4_08|ARPC4	TACAACCTGTGACCATCAGC	ARPC4	1655	1353	1	1	0	0	0	0	3188	0	47	0	0	3331	2	1	1408
4|CRko|sg_hARPC4_09|ARPC4	TGTGGAACGACACAACAAGC	ARPC4	2	245	1242	1481	2465	2	0	0	0	4935	753	2	1	2907	2	0	1424
4|CRko|sg_hARPC4_10|ARPC4	CCGGAAGTGGAAGTCAGGTA	ARPC4	1645	803	5026	2372	2	0	0	0	0	1918	2	0	0	0	2	2	1306
4|CRko|sg_hASF1B_01|ASF1B	ATCCCAGAGACTGATGCCGT	ASF1B	1094	812	2202	6952	8688	0	0	1	2112	1	1	0	1	1	1	3120	1520
4|CRko|sg_hASF1B_02|ASF1B	ATTTGATCAGATCCTAGACT	ASF1B	2	3023	570	4961	1	5301	2	4267	0	5	0	0	0	0	3895	1	1167
4|CRko|sg_hASF1B_03|ASF1B	GAGTGGAAGATCATTTATGT	ASF1B	33	1642	476	453	0	3738	1	1	1	870	829	0	0	936	0	0	1164
4|CRko|sg_hASF1B_04|ASF1B	TGGACAGGAGTTCATCCGAG	ASF1B	809	3913	364	2022	4	5	2	2365	3145	830	763	1	1	673	5715	5238	1414
4|CRko|sg_hASF1B_05|ASF1B	TGTTGACGTAGTAGCCCACT	ASF1B	2	4	2167	8332	0	0	0	1	0	0	0	0	0	0	0	0	1310
4|CRko|sg_hASF1B_06|ASF1B	GCGGGTTCTCACGCAGCTCA	ASF1B	758	1239	4102	12	1	1	3290	5	2	6541	2643	0	5637	1	2	0	1540
4|CRko|sg_hASF1B_07|ASF1B	CTTCGAGTGCAGTGAAGCCC	ASF1B	2264	4502	1384	130	0	1	0	25	1	0	0	0	3708	1	8377	1	1429
4|CRko|sg_hASF1B_08|ASF1B	GGCCCCACCTGGGAGAAATC	ASF1B	1304	2440	3268	4428	2	1	4	3	1128	0	2	12813	38690	1	2	2443	1333
4|CRko|sg_hASF1B_09|ASF1B	AGGGGCTGTGGAAAGGGCTC	ASF1B	46	4033	1184	2752	1	0	0	0	2	0	0	0	1	0	0	1	1336
4|CRko|sg_hASF1B_10|ASF1B	GAGGACCACAGTCACACCCA	ASF1B	947	2577	3860	155	2	0	0	0	1578	0	2464	0	1	1	0	2325	1544
4|CRko|sg_hASPH_01|ASPH	AACCGAGCATAGTTACCACG	ASPH	1523	1410	3653	660	2	0	0	0	0	0	529	0	0	0	0	0	1406
4|CRko|sg_hASPH_02|ASPH	AGAAGTAATGAGGTGCTACG	ASPH	2001	2287	2164	876	2213	1	0	4213	2128	2	2	0	1	0	0	0	1420
4|CRko|sg_hASPH_03|ASPH	TCAAGAGGTATCCCACGCCA	ASPH	2480	1166	127	2927	0	0	1	3	1	0	0	0	0	1	0	0	1373
4|CRko|sg_hASPH_04|ASPH	TCTACAGGATTATCCTCAGG	ASPH	1114	594	2950	3550	1	0	0	0	0	0	0	0	0	0	0	3777	1176
4|CRko|sg_hASPH_05|ASPH	GGCGTGGGATACCTCTTGAT	ASPH	1046	2709	2634	1091	1	2	2	1767	1934	2517	1907	0	1	4673	2	1460	1408
4|CRko|sg_hASPH_06|ASPH	AGAGTCCACGAGCAAGATAT	ASPH	1124	2645	2238	1424	0	0	1	1040	0	1	2	0	0	1	3	1184	1349
4|CRko|sg_hASPH_07|ASPH	GTACTTGCCTAATAAAACTT	ASPH	332	1489	2724	2	1	0	0	2296	4	3	3	0	31479	2	3	0	1093
4|CRko|sg_hASPH_08|ASPH	GAAATGGTACACGCAGAACA	ASPH	2437	1548	1494	5674	3534	3	0	1	1	2	666	0	2	2857	11867	1	1429
4|CRko|sg_hASPH_09|ASPH	GAACAGCAGGAAGTACCACC	ASPH	3397	1444	359	45	2	1	3886	4628	2	4	1848	1	0	1	2	0	1535
4|CRko|sg_hASPH_10|ASPH	ACCTACTCAGGTCATATGAG	ASPH	845	2662	2816	1014	1	0	0	0	0	0	0	0	0	3397	0	2597	1324
4|CRko|sg_hASPSCR1_01|ASPSCR1	ACTTCAGATCATATTCACAG	ASPSCR1	961	2498	2892	1	1	0	0	0	0	0	1	0	0	3738	0	2643	1193
4|CRko|sg_hASPSCR1_02|ASPSCR1	ATGAAGTGCTACGACCCCGT	ASPSCR1	1	1205	1135	453	1	5561	1	5	1	3	780	1	0	1	14431	1	1481
4|CRko|sg_hASPSCR1_03|ASPSCR1	CCCAGTCTGCGTGTACACGA	ASPSCR1	3118	1283	2091	1816	1	2	0	5470	2	1	1	0	0	3708	0	0	1463
4|CRko|sg_hASPSCR1_04|ASPSCR1	CCGGACGGCTCAAGTCGCCG	ASPSCR1	843	3085	6100	908	7827	0	0	2	1794	2	737	1	0	1	2	1519	1587
4|CRko|sg_hASPSCR1_05|ASPSCR1	AAGCCTGGGCTCGTCAGCGT	ASPSCR1	705	2635	3201	0	0	3	0	3603	1984	1	853	0	0	0	0	0	1486
4|CRko|sg_hASPSCR1_06|ASPSCR1	ACTGATGCTCACCTGATCTG	ASPSCR1	968	663	5955	3852	2	0	5702	1	2149	1	1	0	1	3451	1	6369	1404
4|CRko|sg_hASPSCR1_07|ASPSCR1	GGACGACGTGAGAAGACGCT	ASPSCR1	315	2639	3361	1934	4	2	0	4892	2089	1	4	1	1	6178	1	3	1490
4|CRko|sg_hASPSCR1_08|ASPSCR1	AGGTCGGGGTGGCACACCAC	ASPSCR1	1267	1702	2745	244	4098	1	2	3349	999	0	1	1	0	2	13976	2935	1430
4|CRko|sg_hASPSCR1_09|ASPSCR1	GAGGGGCCTGAGAACATGGT	ASPSCR1	272	3425	1644	3408	6	5	2	3	3	18003	2	0	7065	1	20020	4	1456
4|CRko|sg_hASPSCR1_10|ASPSCR1	ACCCGAGAAAGGAACAAAGG	ASPSCR1	750	414	1293	963	5947	3	2	4968	1262	3336	0	0	0	3174	4705	6455	1348
4|CRko|sg_hASXL1_01|ASXL1	ATCTGACGTACACTTTCCAG	ASXL1	666	2562	3516	2165	6239	2	0	4414	2	0	0	1	0	0	1	1	1256
4|CRko|sg_hASXL1_02|ASXL1	GAATCAGTGCGTATACAGCG	ASXL1	372	3368	3	313	1	0	0	2	1	3	1	1	1	4524	0	0	1517
4|CRko|sg_hASXL1_03|ASXL1	GGTCAAATGAAGCGCAACAG	ASXL1	1712	1263	4575	2769	2	0	0	3	0	0	1	0	0	0	5013	0	1408
4|CRko|sg_hASXL1_04|ASXL1	TTTCACGTATCAAACCACCC	ASXL1	361	937	3	2235	2	0	1	0	1	499	840	0	1	4436	0	0	1201
4|CRko|sg_hASXL1_05|ASXL1	TCCTGGCGCCAGTCCAACCC	ASXL1	1920	4389	1787	15	1	0	0	1	0	1692	819	0	0	0	0	0	1360
4|CRko|sg_hASXL1_06|ASXL1	GAAGGTCCGAGAGTTGATCA	ASXL1	532	1402	4065	2878	4291	1	1	1	0	0	113	0	0	0	0	0	1247
4|CRko|sg_hASXL1_07|ASXL1	GAGTCATTGCAGCAGAACGT	ASXL1	468	420	1783	1067	0	1	1	0	0	1	2098	0	8514	0	0	0	1465
4|CRko|sg_hASXL1_08|ASXL1	AGAGGAGTCAGGACAACTCG	ASXL1	1600	1779	6	1265	3	0	5127	0	0	0	507	0	0	0	7555	0	1391
4|CRko|sg_hASXL1_09|ASXL1	TGCAGAGGCCGCCTGCTCAA	ASXL1	2383	1712	6044	1305	224	2	0	2	2	0	1238	14626	1	1	0	0	1497
4|CRko|sg_hASXL1_10|ASXL1	GCACAGTCCAGAGTGAAGTA	ASXL1	2179	3797	4378	2774	4	0	1	3	1	2207	0	0	11568	0	3419	3525	1433
4|CRko|sg_hATAD1_01|ATAD1	ACACTGACCGATAAGTGGTA	ATAD1	876	3070	1559	5	0	1	0	0	0	0	0	0	0	1	0	13889	1308
4|CRko|sg_hATAD1_02|ATAD1	ATACTTTACTATCAAATGGA	ATAD1	1736	196	809	28	4158	1	2	0	1	0	0	0	0	1328	5910	7085	948
4|CRko|sg_hATAD1_03|ATAD1	CATAAACTGAGCTTTCATCA	ATAD1	1524	1678	882	180	0	0	0	1	0	0	0	1	0	2839	8481	0	1208
4|CRko|sg_hATAD1_04|ATAD1	TACATACATGCATATTAAGA	ATAD1	1451	967	2643	344	0	0	0	0	0	0	0	0	0	0	0	1231	962
4|CRko|sg_hATAD1_05|ATAD1	GTTACTTGGAGTGATATAGC	ATAD1	555	154	1652	925	69	10990	3	4	1180	1	1	1	1	2	1	4074	1152
4|CRko|sg_hATAD1_06|ATAD1	TCATCTATAAAGATGATGGA	ATAD1	483	590	1865	1870	0	3	1	3139	0	1	1688	14320	1	4810	0	8497	980
4|CRko|sg_hATAD1_07|ATAD1	GGCCCATAGAGAAGAACACC	ATAD1	385	2255	2348	4300	2	10757	1	2	0	1	3	1	1	2	1	1	1412
4|CRko|sg_hATAD1_08|ATAD1	GTATGGAGAATCTCAGAAAT	ATAD1	1699	2	4038	261	1	1	2720	1	0	1	1	0	0	2	6013	3064	1116
4|CRko|sg_hATAD1_09|ATAD1	CTATATCACTCCAAGTAACC	ATAD1	1041	1774	1476	460	402	1	1	2140	1	3	2187	0	2	1	0	0	1272
4|CRko|sg_hATAD1_10|ATAD1	AGATTCTCCATACCACTTAT	ATAD1	1044	685	1889	1933	0	1	6568	1	4	3	2	0	0	1913	7660	1134	1223
4|CRko|sg_hATAD3A_01|ATAD3A	GCGACATCGCCATAGCAACA	ATAD3A	3704	2056	3738	1048	3	10055	1	3	3943	2	463	0	1	2503	3	0	1518
4|CRko|sg_hATAD3A_02|ATAD3A	TGTCGCCGGCCGCTTCATCG	ATAD3A	2317	2051	2399	924	3	5674	0	3	0	4	819	0	1	1	0	1	1539
4|CRko|sg_hATAD3A_03|ATAD3A	TTTGTCCCAGTCTGTCACAA	ATAD3A	2061	1	1040	1	0	0	0	0	0	0	0	0	0	0	0	0	1219
4|CRko|sg_hATAD3A_04|ATAD3A	GACGGTGCTCGGCCGCCTTC	ATAD3A	1805	1317	3706	288	0	1	1	1	0	1	0	0	0	0	12702	2	1343
4|CRko|sg_hATAD3A_05|ATAD3A	AAGAATGCCACGCTTGTCGC	ATAD3A	1238	1633	2530	2654	1	1	0	1829	0	1	1719	0	2	0	10861	0	1496
4|CRko|sg_hATAD3A_06|ATAD3A	CGAGCAGATCCGCCTGAAGG	ATAD3A	1282	1997	4204	4824	0	0	0	0	0	0	0	0	1	1	0	4567	1565
4|CRko|sg_hATAD3A_07|ATAD3A	TGCGTCTGCAGGTTATGCCA	ATAD3A	535	2174	2094	1842	0	0	0	1	0	0	0	0	0	3463	0	0	1399
4|CRko|sg_hATAD3A_08|ATAD3A	AGACAGCCTACCTCGCCGCA	ATAD3A	1	1164	2	3816	3925	1	1	0	2350	0	1	0	0	1	4701	1	1618
4|CRko|sg_hATAD3A_09|ATAD3A	GCTCAAGAGCGAGCAGATCC	ATAD3A	1018	1219	0	679	3407	0	0	0	0	2	0	0	0	0	0	0	1515
4|CRko|sg_hATAD3A_10|ATAD3A	ATGGACTACGCCATCATGAC	ATAD3A	0	2	2427	1221	1	0	2	0	1	1	0	0	17375	1	2	0	1337
4|CRko|sg_hATAT1_01|ATAT1	AGGGTCGGTCAATTGCCAGT	ATAT1	1836	2281	6460	913	0	0	0	2274	0	1	1525	0	0	5027	479	1	1370
4|CRko|sg_hATAT1_02|ATAT1	CAGGCTTTACCAGCGGGCGT	ATAT1	1689	2614	1	328	0	0	0	0	1	3075	0	0	0	1	1	0	1447
4|CRko|sg_hATAT1_03|ATAT1	TGATCGTGAGGCTCATAATG	ATAT1	397	2732	2	1689	1	0	0	0	1	2	2317	0	0	0	1	8089	1196
4|CRko|sg_hATAT1_04|ATAT1	TGATGCACTAGTGATAGGAG	ATAT1	57	1815	3508	872	1	0	1	4190	0	0	1490	0	0	1	12983	1	1125
4|CRko|sg_hATAT1_05|ATAT1	GTGATACCTGCAACATATAC	ATAT1	48	1875	4629	128	2	0	1	0	1754	2	1	0	1	5254	0	3962	1273
4|CRko|sg_hATAT1_06|ATAT1	TGAGAATATAAACAACATGG	ATAT1	1148	3047	2275	504	8238	0	0	1	0	1	1	0	1	0	1	0	1199
4|CRko|sg_hATAT1_07|ATAT1	CCTGAATAAGCACTACAATC	ATAT1	482	2059	2178	1857	0	0	0	0	0	0	0	0	0	0	0	0	1248
4|CRko|sg_hATAT1_08|ATAT1	ATGACCATTATAGATGAACT	ATAT1	1814	2027	6	95	1	1	0	0	1	0	0	0	0	3861	0	0	1084
4|CRko|sg_hATAT1_09|ATAT1	TGTCGAGTTGCCCTCAGAGA	ATAT1	1556	1493	2448	1071	3	4	5	2532	4	21620	4	1	11495	3	1	2	1209
4|CRko|sg_hATAT1_10|ATAT1	CACAGCTACCTTCAGAACTG	ATAT1	1087	6477	3953	167	0	0	0	1	0	3274	715	0	0	0	0	1835	1473
4|CRko|sg_hATF2_01|ATF2	ACATACCGGAGTTTCTGTAG	ATF2	880	1376	6621	416	2	0	1	2325	2	1	2679	0	3684	0	16099	0	1277
4|CRko|sg_hATF2_02|ATF2	GCAAGAGGGGATAAATCTAG	ATF2	2613	2874	5976	128	0	1	1	641	2	0	786	0	1	789	0	0	1155
4|CRko|sg_hATF2_03|ATF2	GCTCGTTCGACCAGTCACCA	ATF2	1549	4157	8293	1791	1	0	0	3	3846	1	844	1	0	1	3	5801	1493
4|CRko|sg_hATF2_04|ATF2	GGACGAACAATAGCTGATGT	ATF2	1162	2857	486	4201	8951	2	0	2290	2139	2849	1182	1	2	8648	0	2	1401
4|CRko|sg_hATF2_05|ATF2	CTCAAGTACTGTAATCACCC	ATF2	1491	2683	2407	605	1	1	0	0	0	2	1614	1	0	0	5753	0	1260
4|CRko|sg_hATF2_06|ATF2	GGTGAGGTAAAGGACTATCC	ATF2	1534	1679	2041	855	0	1	0	1	2571	1	1866	1	0	1773	6861	2	1388
4|CRko|sg_hATF2_07|ATF2	CACATCCACTACAGAAACTC	ATF2	1473	2732	1874	2189	1	0	3	6509	1	416	2	0	0	0	0	0	1359
4|CRko|sg_hATF2_08|ATF2	GACAGCCAAATGATCCTCGT	ATF2	801	1063	1895	1686	0	2	2849	1	0	1	0	1	2	7646	4616	0	1464
4|CRko|sg_hATF2_09|ATF2	GGTAACTGGAGGATGTTGCT	ATF2	1	2544	4405	763	2	1	2552	2633	1	1	661	1	0	0	1	1	1421
4|CRko|sg_hATF2_10|ATF2	TCATCACTGGTAGTAGACTC	ATF2	1	890	2206	903	0	0	0	0	0	0	0	0	0	0	0	0	1295
4|CRko|sg_hATF3_01|ATF3	CCAGCGCAGAGGACATCCGG	ATF3	3168	2892	542	1659	2483	0	1	2	0	0	201	0	6956	0	0	0	1578
4|CRko|sg_hATF3_02|ATF3	GGCAGAAGCACTCACTTCCG	ATF3	3567	1785	5778	1395	1	0	0	0	0	3	0	1	15689	3168	0	0	1476
4|CRko|sg_hATF3_03|ATF3	TCAAACACCAGTGACCCAGG	ATF3	1825	3649	3585	2271	0	0	929	0	2	1	1249	0	0	0	4	1472	1391
4|CRko|sg_hATF3_04|ATF3	TGTCAGCGACAGACCCCTCG	ATF3	1101	1464	6916	3373	0	1	0	1	2456	1	0	1	13543	0	3	0	1588
4|CRko|sg_hATF3_05|ATF3	TAACCTGACGCCCTTTGTCA	ATF3	3359	2071	790	6316	4036	0	0	1	1	0	1503	0	0	0	1	7770	1321
4|CRko|sg_hATF3_06|ATF3	CTGTCAGCGACAGACCCCTC	ATF3	503	3830	86	2724	2	0	1123	2288	1	1	671	0	0	2	0	486	1507
4|CRko|sg_hATF3_07|ATF3	ATTCCAGCGCAGAGGACATC	ATF3	2252	2620	2150	2108	0	5723	1	3	1	4	1616	0	0	0	0	0	1349
4|CRko|sg_hATF3_08|ATF3	GTTGCTTGTCCCCCAGGAGT	ATF3	2530	1195	2658	1662	0	0	0	1056	2	1	523	10647	0	0	3	0	1384
4|CRko|sg_hATF3_09|ATF3	AAAGTGCCGAAACAAGAAGA	ATF3	2732	2649	4519	790	3	1	3	3917	1	2143	1	0	0	1	0	0	1301
4|CRko|sg_hATF3_10|ATF3	TAGCCCCTGAAGAAGATGAA	ATF3	2534	2066	556	1602	4	6595	1	3	2	2	373	0	1	2	1	3	1260
4|CRko|sg_hATF6_01|ATF6	GAATAAGAGTCCACTGACCG	ATF6	2385	2656	3306	790	3	1	0	2	1	1	454	0	0	7	0	3782	1478
4|CRko|sg_hATF6_02|ATF6	TGAGCCCTGCAAATCAAAGG	ATF6	1667	769	2455	917	1	1	0	1	2	0	609	0	0	2	0	0	1301
4|CRko|sg_hATF6_03|ATF6	TTGTAGGACAGGTTTAGTCA	ATF6	2	1740	2381	539	7490	1	0	1	1	2	0	0	0	2937	9453	1436	1161
4|CRko|sg_hATF6_04|ATF6	TTTGCCAATGGCATAAGCGT	ATF6	1752	3	4305	1	2398	1	0	1	0	1	886	0	1	1915	0	1693	1254
4|CRko|sg_hATF6_05|ATF6	AGGGTTAGAGGCGAGATTAA	ATF6	2	1313	3412	5170	2608	0	0	0	1	0	0	0	1	2807	2	0	1254
4|CRko|sg_hATF6_06|ATF6	TCAGCGAATAGCCCAGTGAA	ATF6	2924	3014	1244	4781	1	1	0	1	1	1	2	0	0	6429	1	9159	1396
4|CRko|sg_hATF6_07|ATF6	TGAGCAGAGGGCAGAACTCC	ATF6	3395	4958	2240	42	0	0	0	236	0	0	1	0	0	0	6877	1	1442
4|CRko|sg_hATF6_08|ATF6	GCATTTATAATACTGAACTA	ATF6	621	1754	4919	6196	0	0	1	3684	1	0	4	0	2	0	10482	0	999
4|CRko|sg_hATF6_09|ATF6	ACTGGTCCTAGGAACAAGAC	ATF6	4	2633	2532	139	0	0	1	0	1	1	899	1	0	0	1	0	1389
4|CRko|sg_hATF6_10|ATF6	TCCCAAATGTCTGACTCCCA	ATF6	8	476	2725	149	1	0	2	3147	1	1831	0	1	1	0	0	9186	1215
4|CRko|sg_hATF7_01|ATF7	AGCCCACCCCTAGTACTGGG	ATF7	1284	1672	3041	273	0	0	0	0	0	0	1	0	4760	0	1	0	1463
4|CRko|sg_hATF7_02|ATF7	CAAGTCTCCTCAATCAATGG	ATF7	1571	1374	1022	1239	0	1	9134	3	1	2	1	0	1	1	0	0	1354
4|CRko|sg_hATF7_03|ATF7	CCCAACCTCTGTCATCACAC	ATF7	1473	2849	1693	495	0	0	0	2168	1	1	1572	1	2	0	0	0	1461
4|CRko|sg_hATF7_04|ATF7	GAGCCAGGACGTACAATGGT	ATF7	830	843	3102	5481	3633	1	0	0	0	1	1947	0	8377	0	1	0	1561
4|CRko|sg_hATF7_05|ATF7	ACACCCACCATTGTACGTCC	ATF7	823	1839	568	9900	2	0	0	2264	0	1	0	0	1	0	0	0	1483
4|CRko|sg_hATF7_06|ATF7	ATGGAGCCACTACTGTTAAC	ATF7	1177	1752	1557	8	0	1	0	1	1	0	1	0	0	1	0	0	1286
4|CRko|sg_hATF7_07|ATF7	CACAGGCTCCACCATCCAAC	ATF7	962	2965	7067	2684	300	1	0	1	0	0	684	0	1	5176	4786	0	1481
4|CRko|sg_hATF7_08|ATF7	ATAACAGACGGCATCTGTAC	ATF7	1	1966	991	642	5247	0	0	1	0	0	2	0	1	0	0	1	1464
4|CRko|sg_hATF7_09|ATF7	GAGTAAGAGCCACTGACCTG	ATF7	1141	2048	1607	923	635	1	1	1	1	1812	0	0	9665	0	1	0	1469
4|CRko|sg_hATF7_10|ATF7	AATGATGACTGAGTCAGTTC	ATF7	1643	1593	1325	1745	0	0	0	0	0	0	429	0	0	0	1	0	1290
4|CRko|sg_hATM_01|ATM	CCAAGGCTATTCAGTGTGCG	ATM	2019	1984	1148	257	1	0	2	4584	0	0	1	0	1	6642	9173	1	1469
4|CRko|sg_hATM_02|ATM	GACCTACCTGAATAACACAC	ATM	1	1483	944	2322	0	0	1	0	0	4749	1	0	0	0	2	0	1305
4|CRko|sg_hATM_03|ATM	TCATCACCAAGTTCGCATGT	ATM	1114	2137	60	8	0	4526	2	0	0	0	1	0	0	2	0	0	1404
4|CRko|sg_hATM_04|ATM	TCTACCCCAACAGCGACATG	ATM	1950	2422	2145	1425	0	1	1	1	1	0	1	0	0	0	0	1	1395
4|CRko|sg_hATM_05|ATM	AGCATCCTTACAGTAAGTCA	ATM	416	609	639	1645	1	0	1	0	0	2912	0	1	0	1	0	9304	1228
4|CRko|sg_hATM_06|ATM	TAAAGATGCATCTTATACCA	ATM	564	366	987	199	0	0	0	0	0	0	0	0	0	0	0	0	1023
4|CRko|sg_hATM_07|ATM	GTGGACAGAGAAGCCAATAC	ATM	863	489	2038	1089	1	5061	1	0	0	0	0	0	0	0	1	0	1383
4|CRko|sg_hATM_08|ATM	GTACCCTCATAGGCAAAATA	ATM	526	2465	1139	1556	1	1	1	2447	2324	332	2461	0	1	0	1	1	1126
4|CRko|sg_hATM_09|ATM	GCATCACTAACACTACTATC	ATM	1230	1230	1129	0	1	0	0	1789	1863	2	1724	1	0	0	8049	1	1236
4|CRko|sg_hATM_10|ATM	ACTCTATGAACATCTTGTGA	ATM	725	1780	758	9140	0	1	1	1815	0	1	1361	0	0	0	0	0	1281
4|CRko|sg_hATN1_01|ATN1	GAGAAGGCTGAGTATACTTG	ATN1	1715	1537	6142	3409	5	12017	0	1355	4	0	2	0	1	2845	4	3985	1365
4|CRko|sg_hATN1_02|ATN1	GAGGTTCCTCGATAGCCCGG	ATN1	0	813	4940	2236	571	1	0	0	1	2	1	1	0	0	0	3019	1462
4|CRko|sg_hATN1_03|ATN1	GCAGGTTCGGTGTCACATGG	ATN1	2809	4230	2367	5761	3579	8103	1	2861	2	7	2	0	1	1	9804	3085	1393
4|CRko|sg_hATN1_04|ATN1	TCCAAGCTATCCAGATCGGA	ATN1	724	2545	2636	1019	0	0	0	1	1	0	717	1	0	1	12553	0	1220
4|CRko|sg_hATN1_05|ATN1	GCTGGGTACATCTACCACCT	ATN1	2899	3173	4291	2383	3380	1	1	5111	1	0	2	1	0	0	2	1	1494
4|CRko|sg_hATN1_06|ATN1	GAGGTGGTGACCGTAGGCAC	ATN1	2588	441	3145	4500	0	0	0	1	3981	2	0	0	0	0	1	1	1418
4|CRko|sg_hATN1_07|ATN1	TCAGTGGGGGGCCCTAATGG	ATN1	1198	3435	5694	2	1	6469	1	2911	0	0	2	0	0	0	1	0	1236
4|CRko|sg_hATN1_08|ATN1	TGGGGTTCAAAGCTAGCCTC	ATN1	1223	1744	2828	971	3	2	0	0	0	1	637	3	4083	3489	2	6236	1310
4|CRko|sg_hATN1_09|ATN1	GAATAAGGAAACCTCATGGG	ATN1	3232	2050	1996	3891	6499	3	9557	6	1711	9	1497	1	50205	2	2	2	1310
4|CRko|sg_hATN1_10|ATN1	GGGAGCTACCGCCCTCCAGT	ATN1	1283	650	1584	1824	6151	0	1160	2396	2	1	0	0	0	15	1	1	1353
4|CRko|sg_hATP13A2_01|ATP13A2	AGGACGGCTTAGACGTGATG	ATP13A2	1180	1422	3869	0	1	3	0	6690	0	0	707	0	0	0	0	2	1462
4|CRko|sg_hATP13A2_02|ATP13A2	AGGCAGCCCAGCAACTGACG	ATP13A2	2066	5104	2452	7591	1	2	1	1	3438	2	1374	0	2	0	0	2	1669
4|CRko|sg_hATP13A2_03|ATP13A2	CCGGTATGCTGATCACGTTG	ATP13A2	1	1890	1369	2420	3281	1	0	0	1	2	0	0	1	0	0	0	1522
4|CRko|sg_hATP13A2_04|ATP13A2	CGATAACGAGTGTTTCGGCG	ATP13A2	518	1306	2574	1675	1	4300	1	1	727	0	1045	0	0	1	2	0	1146
4|CRko|sg_hATP13A2_05|ATP13A2	CAGGACGTGCGGTCCCACAT	ATP13A2	422	268	2424	1886	0	0	0	0	0	1	690	0	0	2105	0	0	1346
4|CRko|sg_hATP13A2_06|ATP13A2	AGGCACTGAACCCCTACTAT	ATP13A2	742	2303	5608	1177	3924	1	3	3	3710	3	3	2	0	1	6388	4909	1559
4|CRko|sg_hATP13A2_07|ATP13A2	TGTAATCCGGGCTCTCGACC	ATP13A2	1310	856	378	1526	2	12874	1	1	4	2	0	0	0	0	1	0	1443
4|CRko|sg_hATP13A2_08|ATP13A2	TCCAGGGCCAGCGCTATATC	ATP13A2	998	2620	3607	1007	3	0	1	507	1178	1092	769	0	1	0	4265	4528	1312
4|CRko|sg_hATP13A2_09|ATP13A2	TATTTCGATAACGAGTGTTT	ATP13A2	1998	1347	1663	562	1	3	0	1	1	1	509	0	1587	3558	0	0	1062
4|CRko|sg_hATP13A2_10|ATP13A2	GAGGACGGCTTAGACGTGAT	ATP13A2	3128	1206	3619	4995	0	0	0	1	0	0	876	0	0	0	0	0	1402
4|CRko|sg_hATP6AP1_01|ATP6AP1	CGAAGATGTCCCATACACAG	ATP6AP1	551	1349	709	285	0	0	0	0	0	0	0	0	0	0	0	0	1424
4|CRko|sg_hATP6AP1_02|ATP6AP1	GCCGCCAACGACAAAAACAC	ATP6AP1	543	1	2	0	0	0	0	1	1	0	1	0	0	0	0	6947	1433
4|CRko|sg_hATP6AP1_03|ATP6AP1	GCTGACTGCATACCAGTCGA	ATP6AP1	562	931	1274	914	2695	0	0	2	0	2	2	1	0	0	6896	0	1498
4|CRko|sg_hATP6AP1_04|ATP6AP1	GTTACAATGACACCGCTCCC	ATP6AP1	0	177	1646	0	0	0	0	0	0	0	0	0	0	0	0	0	1200
4|CRko|sg_hATP6AP1_05|ATP6AP1	GATGTGGCCTTCATGAGTGT	ATP6AP1	0	2	663	862	0	0	1	1797	0	1	0	0	0	0	0	0	1368
4|CRko|sg_hATP6AP1_06|ATP6AP1	GGAAGGGCGGACCGCTGTGA	ATP6AP1	813	2062	2706	2	2	0	0	0	13	0	883	0	0	0	0	1355	1466
4|CRko|sg_hATP6AP1_07|ATP6AP1	GTGCCATCAGACCAGAGCTA	ATP6AP1	958	1077	587	30	2	2	1	1	1	2	1	0	0	2083	2	4829	1447
4|CRko|sg_hATP6AP1_08|ATP6AP1	GAGGATTTCACAGCATATGG	ATP6AP1	0	1283	3714	1	0	0	0	4506	0	0	2	0	1780	0	0	1	1342
4|CRko|sg_hATP6AP1_09|ATP6AP1	GTTGAGTTCCTGCACCCCAA	ATP6AP1	189	692	1	0	0	0	0	0	0	0	0	0	0	0	0	0	1295
4|CRko|sg_hATP6AP1_10|ATP6AP1	TACCTACTTAGATCCCGCCC	ATP6AP1	581	536	2	885	1	0	433	0	0	3354	0	0	1	0	0	0	1340
4|CRko|sg_hATP6AP2_01|ATP6AP2	AGGAGAGCGGATCCCAGACG	ATP6AP2	409	1960	1093	929	1	1	1	2516	0	0	2276	0	1	1	0	4503	1535
4|CRko|sg_hATP6AP2_02|ATP6AP2	GAGAGTGTATATGGTAGGGA	ATP6AP2	2685	1177	2092	932	2	2	1063	3533	0	0	0	0	0	0	0	0	1251
4|CRko|sg_hATP6AP2_03|ATP6AP2	TCCCCCTCAATTCTCTGAGT	ATP6AP2	1395	2263	2987	605	0	1	0	1701	2	3154	1026	1	1	0	3104	4827	1309
4|CRko|sg_hATP6AP2_04|ATP6AP2	TGAAATTGGGAAGCGTTATG	ATP6AP2	507	892	1100	0	0	0	0	1	0	0	979	0	0	0	0	0	1203
4|CRko|sg_hATP6AP2_05|ATP6AP2	GCTGGCGCAAGGTGACTGAA	ATP6AP2	2	1999	572	2969	0	0	2794	1	2	4	1230	0	0	1	0	6773	1564
4|CRko|sg_hATP6AP2_06|ATP6AP2	TGCTTATGACGAGACAGCTT	ATP6AP2	1513	593	1911	50	3402	7218	2	0	1	4	0	10035	1	1	1	3021	1280
4|CRko|sg_hATP6AP2_07|ATP6AP2	TAGCCCGAGGACGATGAAAC	ATP6AP2	0	1971	3	908	479	3	1	1	1	9491	0	1	0	1182	0	2254	1340
4|CRko|sg_hATP6AP2_08|ATP6AP2	AACAAACTGGCTCTACCCCC	ATP6AP2	183	207	1133	28	1838	3	1	0	3578	1	24	0	12382	1	0	0	1433
4|CRko|sg_hATP6AP2_09|ATP6AP2	TTAGTATATTAAAATCACCA	ATP6AP2	0	751	6	0	1	0	0	0	0	0	0	0	0	0	8287	0	818
4|CRko|sg_hATP6AP2_10|ATP6AP2	TCCTACTCAGAGAATTGAGG	ATP6AP2	762	932	0	5	0	3804	2	0	1	2	2	0	1	1	4991	1	1175
4|CRko|sg_hATP6V0A2_01|ATP6V0A2	CACACGGCTGTAGACAGACT	ATP6V0A2	832	3277	3701	2652	6445	1	0	3	1	3	641	1	10625	2	4467	3627	1463
4|CRko|sg_hATP6V0A2_02|ATP6V0A2	CGAGGGATTTCAGAACATCG	ATP6V0A2	1685	3475	470	1030	0	1	2	4704	1	4118	1	0	0	0	5179	2656	1224
4|CRko|sg_hATP6V0A2_03|ATP6V0A2	CTTTGTGAAACGCAATGTTG	ATP6V0A2	145	1593	4907	620	1	9184	1	1	0	0	1	370	0	1	0	0	1274
4|CRko|sg_hATP6V0A2_04|ATP6V0A2	TGTTTGGATAGGGGTACACG	ATP6V0A2	724	1714	834	675	5177	12004	3	5	2	0	3	15673	0	2546	1	1462	1178
4|CRko|sg_hATP6V0A2_05|ATP6V0A2	AGCTACAGAGAAGTCAATCC	ATP6V0A2	799	2474	3069	329	1	0	1	0	1	6150	1087	0	0	0	0	1	1414
4|CRko|sg_hATP6V0A2_06|ATP6V0A2	AAGAATCACTCTCTAAGGAA	ATP6V0A2	1928	1950	6632	340	0	0	0	2	1718	0	374	0	0	1	0	1037	1179
4|CRko|sg_hATP6V0A2_07|ATP6V0A2	TAAGGGCCTCGGAACACTCC	ATP6V0A2	2248	639	1277	4017	0	1	1904	42	0	1	0	0	1	1351	6991	0	1377
4|CRko|sg_hATP6V0A2_08|ATP6V0A2	CATGTTCAGCATGTGATAGA	ATP6V0A2	20	2314	3885	2	1	1	0	0	7220	1	1595	0	0	0	1	0	1232
4|CRko|sg_hATP6V0A2_09|ATP6V0A2	GGATTCATCCAGTTCTGCAT	ATP6V0A2	2633	1605	2291	473	3398	1	1767	2189	0	0	737	0	0	0	1	5157	1368
4|CRko|sg_hATP6V0A2_10|ATP6V0A2	GGGCTGTTCTCAGTGTACAC	ATP6V0A2	513	859	3082	151	3	0	0	4	1	2366	1	16967	0	0	9478	1	1316
4|CRko|sg_hATP6V1C2_01|ATP6V1C2	CTCATCAGAGAGGCCAACCA	ATP6V1C2	1570	4491	2793	311	3	2	2	3	2	20924	1117	0	1	2612	1	2929	1431
4|CRko|sg_hATP6V1C2_02|ATP6V1C2	GAGCACCTCCTGGCAAACGG	ATP6V1C2	1515	1856	545	2501	1	6545	679	2	3510	3	635	1	4295	3	1	4136	1571
4|CRko|sg_hATP6V1C2_03|ATP6V1C2	GCAGACCAAACTACTCACAA	ATP6V1C2	2806	3209	4114	877	1	0	1055	2	3	1	1253	10611	7814	2232	1	1	1354
4|CRko|sg_hATP6V1C2_04|ATP6V1C2	GTGTCCACCACACTCACGAG	ATP6V1C2	2497	2298	3958	2081	2	1	2432	2217	3	3	2	1	35664	3477	3030	3	1564
4|CRko|sg_hATP6V1C2_05|ATP6V1C2	GAAGTCAGGAATAGCGAATT	ATP6V1C2	1693	2379	806	2017	3676	0	0	2	0	1	0	0	1929	1	1	0	1301
4|CRko|sg_hATP6V1C2_06|ATP6V1C2	ATTACTGAGGACAAGGAAGG	ATP6V1C2	568	1342	1695	1577	3123	2	2	1	2	391	1	2	1994	0	0	0	1251
4|CRko|sg_hATP6V1C2_07|ATP6V1C2	ATGATGAGAAGGAAATTGAA	ATP6V1C2	1023	2817	3503	921	141	1	1	0	0	0	3	0	0	0	1136	0	1086
4|CRko|sg_hATP6V1C2_08|ATP6V1C2	GAGTGTTGTAGGCGGCCGTT	ATP6V1C2	2387	2178	6898	659	0	0	0	0	0	0	0	0	0	0	0	0	1361
4|CRko|sg_hATP6V1C2_09|ATP6V1C2	TTAGGGGGAACCTCTTCACC	ATP6V1C2	812	2046	465	1111	3312	1	1	1	2	0	452	0	0	0	0	0	1192
4|CRko|sg_hATP6V1C2_10|ATP6V1C2	AAGTCATGGAGGACTCAAAG	ATP6V1C2	3096	2168	532	1327	0	1	0	2424	2	1	0	2	1427	0	8902	1387	1261
4|CRko|sg_hATPAF1_01|ATPAF1	GGGAAACAGTCTGTGAACAG	ATPAF1	760	2792	3522	699	3243	2	1	1	1	1242	772	0	0	0	10316	0	1458
4|CRko|sg_hATPAF1_02|ATPAF1	GTAGCGGTCGTAGAAAGGGT	ATPAF1	3159	1186	2275	764	0	1	0	2	1	2346	1	0	1	0	1	0	1181
4|CRko|sg_hATPAF1_03|ATPAF1	TGAATTTCGGAAGCAGCCAG	ATPAF1	3576	1486	4162	3303	3371	2	1	0	1	0	1	0	12027	1	2	2	1442
4|CRko|sg_hATPAF1_04|ATPAF1	GAAATTCACTGCGTTTCTCC	ATPAF1	1045	2982	972	478	1	0	0	0	0	1	0	0	0	1010	0	1	1369
4|CRko|sg_hATPAF1_05|ATPAF1	TGTGAACAGAGGATTCACTA	ATPAF1	1515	955	1195	4203	3454	0	1	2	0	1	815	0	0	0	3	1	1263
4|CRko|sg_hATPAF1_06|ATPAF1	GGCGGGACTCAAAAGCAGCT	ATPAF1	3290	4141	5826	5474	1	4421	1	0	2	2792	594	0	1	0	0	6774	1399
4|CRko|sg_hATPAF1_07|ATPAF1	GATCACCAGAAACTTACTGT	ATPAF1	1617	3693	1401	599	2	0	580	0	2	0	1	2	2	0	0	7738	1374
4|CRko|sg_hATPAF1_08|ATPAF1	GGATTCACTAAGGACAAGGT	ATPAF1	2162	2557	1980	1401	1	1	0	0	0	8142	5	1	1	0	0	4728	1307
4|CRko|sg_hATPAF1_09|ATPAF1	GCAGCAGCTGGATCTTGTCG	ATPAF1	2160	2279	3038	762	3	3	13213	3	3	5	0	2	3	2	12297	2	1480
4|CRko|sg_hATPAF1_10|ATPAF1	GAATTTCGGAAGCAGCCAGT	ATPAF1	1028	3531	2806	1990	2	0	0	0	1360	0	1412	2	0	2	15235	8878	1472
4|CRko|sg_hATXN10_01|ATXN10	ACTCTTTGGAAGATAGTCCT	ATXN10	2	1842	2261	4918	2	1	1	1	1	0	1	1	1	2200	0	2	1177
4|CRko|sg_hATXN10_02|ATXN10	CTGCAGAGATCCATCCCAAG	ATXN10	760	1194	449	809	1	1	0	2650	2	0	849	1	0	8245	0	1	1460
4|CRko|sg_hATXN10_03|ATXN10	TCAGCATGCCGCAAAAACAC	ATXN10	0	89	385	1	4659	1	0	0	2	3	1509	0	2	3	6898	0	1348
4|CRko|sg_hATXN10_04|ATXN10	TCTGTAATAATCAAGAACCT	ATXN10	1158	504	3476	1270	1	0	3	0	2	1	3052	0	0	6066	1	0	1001
4|CRko|sg_hATXN10_05|ATXN10	TTAGGATATCCAGAACTCTT	ATXN10	258	561	2784	4714	0	0	0	0	1	3990	0	0	0	2	0	3884	967
4|CRko|sg_hATXN10_06|ATXN10	GTAACTACCTGATTGAATTC	ATXN10	671	1147	3290	5	0	0	0	3	2	0	1633	1	0	0	0	0	1061
4|CRko|sg_hATXN10_07|ATXN10	TCGTTATCTTGGCTATCATA	ATXN10	777	1015	1	1850	8876	2	0	1	2047	3	2	2	0	2480	0	0	1068
4|CRko|sg_hATXN10_08|ATXN10	GAACAGGAATCTCTGTTGAC	ATXN10	574	801	1031	0	0	0	3	0	0	0	1747	0	0	0	3727	0	1287
4|CRko|sg_hATXN10_09|ATXN10	AAGGTCTTGCTTAAATCATC	ATXN10	9	1526	2966	763	8596	1	2	2	2	0	1127	0	1	1	0	0	1121
4|CRko|sg_hATXN10_10|ATXN10	AGTCTTGCACTGATCCACAA	ATXN10	0	1253	4495	0	1	0	0	0	0	0	0	0	0	0	0	1234	1221
4|CRko|sg_hATXN2_01|ATXN2	AAGTTACTCACCGTAGACTG	ATXN2	2	1042	1604	714	0	0	0	1	0	0	1389	0	0	0	0	1	1384
4|CRko|sg_hATXN2_02|ATXN2	AATAGAGAAGTCATATCCTG	ATXN2	1	1399	3454	2234	1	1	0	2	2706	2	0	0	1	0	0	1	1227
4|CRko|sg_hATXN2_03|ATXN2	GTATTGGAAATACCCCCAGT	ATXN2	465	1630	3346	1501	0	1	1	0	1	3109	15	0	1	2	0	3167	1250
4|CRko|sg_hATXN2_04|ATXN2	GTTGCTACCAAAACAGTCTG	ATXN2	2118	1701	3226	6162	1	0	1	3938	1	0	0	0	8468	4331	0	1	1308
4|CRko|sg_hATXN2_05|ATXN2	GAAGAGAGTTGGGACCTGAC	ATXN2	1403	3416	2642	802	2	1	1933	3	1914	0	1	1	0	1	0	0	1413
4|CRko|sg_hATXN2_06|ATXN2	AGATGCAGCTGGAATAGGCA	ATXN2	1609	2574	1416	208	1	0	0	0	265	0	1625	0	0	0	0	0	1444
4|CRko|sg_hATXN2_07|ATXN2	GGTTGTGGGATACAAATTCT	ATXN2	2014	840	3777	933	3960	1	0	1	0	1	0	0	0	0	3	0	1194
4|CRko|sg_hATXN2_08|ATXN2	AGTAACACGGAGCACAAGAG	ATXN2	4009	2251	3783	4290	1	2	12949	6	0	2	4	9664	0	4725	1	1	1484
4|CRko|sg_hATXN2_09|ATXN2	AAAGTACAGAATCCAGTTCG	ATXN2	549	3110	2926	651	0	1	3	5	159	0	2411	1	8789	0	4256	0	1402
4|CRko|sg_hATXN2_10|ATXN2	GAAATAGAGAAGTCATATCC	ATXN2	58	4110	392	1128	1	0	1	1	1	2513	0	0	1	1	4724	0	1234
4|CRko|sg_hATXN7L3_01|ATXN7L3	CACGGACCCTGATAGCATGA	ATXN7L3	611	2159	2041	2833	2	0	0	4	2	3	3	29947	3	2	0	5955	1367
4|CRko|sg_hATXN7L3_02|ATXN7L3	CATCGCTCAGGAGATATACG	ATXN7L3	1330	562	1780	13	1	0	2	1806	0	1	226	1	0	3597	0	0	1286
4|CRko|sg_hATXN7L3_03|ATXN7L3	GCAGCCGAATCGCCAACCGC	ATXN7L3	1978	2757	4645	1013	0	0	0	1	0	0	667	0	0	0	16	0	1682
4|CRko|sg_hATXN7L3_04|ATXN7L3	GCTTCGCAGCCTGCTAACCA	ATXN7L3	986	1128	2082	1159	1	1	0	2259	0	5	783	0	0	1	4563	0	1390
4|CRko|sg_hATXN7L3_05|ATXN7L3	CCAAACAAGAATCCTCGACC	ATXN7L3	748	894	3818	2397	0	0	0	3344	1	0	0	0	0	1	1	0	1510
4|CRko|sg_hATXN7L3_06|ATXN7L3	GCAATGCTGCGACTGCAATT	ATXN7L3	399	2613	2804	1220	1	2	0	1	0	0	1	0	0	0	0	1	1419
4|CRko|sg_hATXN7L3_07|ATXN7L3	AATGACAACGACTGGTCCTA	ATXN7L3	1937	2333	1163	2748	1	1	0	2592	1	6220	3	1	1	1	0	3201	1326
4|CRko|sg_hATXN7L3_08|ATXN7L3	TATTCCTCTTCCAGCAATGT	ATXN7L3	837	1923	1197	579	1	0	0	0	0	0	0	0	3691	2919	0	0	744
4|CRko|sg_hATXN7L3_09|ATXN7L3	CAGAAATCACCCCACATTGC	ATXN7L3	526	1536	2815	2810	3135	0	0	0	0	0	719	0	0	4639	0	0	1495
4|CRko|sg_hATXN7L3_10|ATXN7L3	TCAGGAGATATACGCGGACC	ATXN7L3	2	940	1653	651	7	0	0	1	0	0	0	0	0	0	1	0	1402
4|CRko|sg_hAXIN2_01|AXIN2	GCTCACACTCAATTCGCGGG	AXIN2	1197	3866	6209	4941	1	1	0	2	2	643	881	1	0	0	6716	14228	1214
4|CRko|sg_hAXIN2_02|AXIN2	GGGAGCCTAAAGGTCGTGTG	AXIN2	1448	821	3116	853	6697	0	0	3	5	3	3155	0	1	1	1	0	1502
4|CRko|sg_hAXIN2_03|AXIN2	GGGAGTGGTACTGCGAATGG	AXIN2	1682	3956	1041	1578	1	1	3	0	3584	2	732	0	5853	0	4956	1	1457
4|CRko|sg_hAXIN2_04|AXIN2	TTACTGCCCACACGATAAGG	AXIN2	317	2006	2962	721	2	12117	0	1	0	1	2	1	0	1	0	2419	1246
4|CRko|sg_hAXIN2_05|AXIN2	ACCGTCTTGATCGCCCAATA	AXIN2	168	1297	688	1	1806	2	3423	2713	0	0	753	2	2	1	1	2955	1211
4|CRko|sg_hAXIN2_06|AXIN2	TTTGCTGGACAAGCCAACCA	AXIN2	0	1725	4253	2	0	1	0	1	0	0	1485	0	0	3494	0	4104	1265
4|CRko|sg_hAXIN2_07|AXIN2	ACCAAGACCTACATAAGAGA	AXIN2	1619	1278	667	722	0	0	0	0	3	2850	0	0	0	3	0	5215	1229
4|CRko|sg_hAXIN2_08|AXIN2	GGAAGACCCGCAGACGATAC	AXIN2	2945	942	6	1659	1	1	0	3073	3795	2	1802	1	1	0	7350	1	1427
4|CRko|sg_hAXIN2_09|AXIN2	GGATGATTCCATGTCCATGA	AXIN2	1266	1655	3768	1010	0	2	1	1	3139	0	580	0	0	0	2	0	1278
4|CRko|sg_hAXIN2_10|AXIN2	CAAAGGTGGCGGGTTCCACG	AXIN2	970	523	1861	1510	2	9030	1	2806	0	1	559	0	1	2475	1	0	1496
4|CRko|sg_hAZIN1_01|AZIN1	AATGGCTTTAGTGCAAGAGT	AZIN1	750	1027	1875	3205	0	0	0	0	0	0	0	2	0	2607	39	4420	1307
4|CRko|sg_hAZIN1_02|AZIN1	ACTTGATGTCCAAATAATTG	AZIN1	1643	1379	454	1028	5	4	0	4	4758	0	3	1	0	2	0	1	1095
4|CRko|sg_hAZIN1_03|AZIN1	GGAAAGTAGATATCCAACAG	AZIN1	977	2237	3446	0	2	1	0	4055	4	4	1	22029	0	4715	1	0	1207
4|CRko|sg_hAZIN1_04|AZIN1	TGCTCGATGTGTGTTTGACA	AZIN1	544	1955	1277	587	0	0	0	2	2	0	1606	0	0	1	0	3711	1312
4|CRko|sg_hAZIN1_05|AZIN1	AGAAGACACATAGTAGCTTC	AZIN1	1148	176	2628	4501	0	2	0	1	1	0	0	0	1	1911	9533	0	1402
4|CRko|sg_hAZIN1_06|AZIN1	GCATCTCTTGGAATGTGCTA	AZIN1	1312	1219	1288	1867	1	1	0	0	0	3563	497	0	1	0	0	0	1302
4|CRko|sg_hAZIN1_07|AZIN1	CAGTCAATGGCAGAATGTAG	AZIN1	3232	1787	1658	2345	0	0	0	0	0	0	0	0	0	0	0	0	1394
4|CRko|sg_hAZIN1_08|AZIN1	CTATGTTTATGAACATACCC	AZIN1	1253	819	0	0	0	0	0	0	0	0	0	0	0	0	0	0	1147
4|CRko|sg_hAZIN1_09|AZIN1	TTTACTGGAACAAGCAAATC	AZIN1	905	1013	225	307	1	0	1	0	0	0	0	0	6304	3979	8311	3685	1124
4|CRko|sg_hAZIN1_10|AZIN1	ATTGCAACAGAAGATAATAT	AZIN1	1018	1903	4092	1145	1	0	0	3702	0	0	831	0	0	3066	0	0	1024
4|CRko|sg_hBAG2_01|BAG2	CACCTCATCAATAATCCTTG	BAG2	2968	4060	4355	1203	1	0	1	2126	0	3949	831	0	1	930	5260	8717	1253
4|CRko|sg_hBAG2_02|BAG2	CTGACTGCAAACCGTTTGAT	BAG2	3	751	2337	5676	0	0	0	1	1795	1	0	0	0	2747	0	0	1209
4|CRko|sg_hBAG2_03|BAG2	TCAACGCTAAAGCCAACGAG	BAG2	1534	1844	1327	595	0	1	0	1361	1404	1777	1	0	1	0	15224	1	1489
4|CRko|sg_hBAG2_04|BAG2	TCCAAAATAGCCAGGACATG	BAG2	384	3219	818	2	0	0	0	1	1959	0	0	0	1	1	472	7049	1291
4|CRko|sg_hBAG2_05|BAG2	GACATGAGGCAGATCAGTGA	BAG2	1785	3623	4026	7553	2	0	1	1428	0	0	0	1	5131	0	1	1523	1384
4|CRko|sg_hBAG2_06|BAG2	AATCCCTAAAGCATGCCACA	BAG2	3759	2871	2319	4102	1	0	0	0	0	0	0	0	0	0	0	1511	1392
4|CRko|sg_hBAG2_07|BAG2	GCCTGGACCAGCTGGAGCTC	BAG2	0	2229	1327	0	1	1	1	2	0	1	0	0	0	0	0	0	625
4|CRko|sg_hBAG2_08|BAG2	GCTGGAGCGGTCAGCCATGG	BAG2	1	1891	3283	1978	0	1	2553	0	2	3	760	0	0	1528	1	0	1501
4|CRko|sg_hBAG2_09|BAG2	GGTCCAGGCTCTCCAGCAGG	BAG2	637	455	1373	632	2538	0	0	0	507	4	0	0	2	0	0	2106	1420
4|CRko|sg_hBAG2_10|BAG2	CTTCTGCCGCTCCTCCTCCA	BAG2	1025	288	2342	2005	2	6958	0	1	1	6	0	1	0	4047	3	3614	1436
4|CRko|sg_hBANP_01|BANP	AGACGTGCAACAAAGTGCGA	BANP	843	1326	3102	1	161	0	0	1	1	0	832	0	0	0	1	0	1514
4|CRko|sg_hBANP_02|BANP	AGGCTGTGTCCAACCTCTCG	BANP	796	1	1278	323	0	2	0	2285	0	0	1579	1	1	0	1	0	1388
4|CRko|sg_hBANP_03|BANP	CGCAGCGTACCCGCATCTCG	BANP	295	593	2393	6	3276	1	1	0	0	0	0	0	0	0	1	0	1537
4|CRko|sg_hBANP_04|BANP	TGGCGGTCAAGAGCTTCTCG	BANP	42	830	487	659	0	0	0	2129	0	1	0	0	0	0	0	2720	1400
4|CRko|sg_hBANP_05|BANP	TTGGCATCACAGAATCCGAC	BANP	524	831	2100	2653	1872	13	1954	2	3	3183	1	1	1	2284	0	0	1455
4|CRko|sg_hBANP_06|BANP	AGAGGGGAGCCGGCCACCAT	BANP	687	1685	2889	1723	125	0	0	0	0	0	0	0	0	0	0	0	1647
4|CRko|sg_hBANP_07|BANP	GCGTCGGCAGAACACCATTG	BANP	3753	798	4011	1719	3560	5441	812	3	1	2	0	0	9921	0	3741	1519	1519
4|CRko|sg_hBANP_08|BANP	AGGACTACCCCAATGGCACC	BANP	1447	596	2362	628	2	0	0	1	0	1	1	1	0	1	2	0	1581
4|CRko|sg_hBANP_09|BANP	GCGACTCTGTGTCCAGCTGT	BANP	1274	27	4720	1464	0	0	0	1	0	1	735	0	0	0	0	1	1511
4|CRko|sg_hBANP_10|BANP	TTGTCTGGTTGATGGAATAC	BANP	758	242	1002	1294	0	0	0	0	0	0	0	0	0	0	0	0	1113
4|CRko|sg_hBARD1_01|BARD1	ATGTCCAGTGTGTTACACCC	BARD1	1169	2	881	776	0	0	0	5	0	0	0	0	0	0	0	0	1214
4|CRko|sg_hBARD1_02|BARD1	GACTGGAAAGTCTATTGTGA	BARD1	0	788	1450	0	0	6166	1	1	2	3	746	1	1	0	1	1086	1245
4|CRko|sg_hBARD1_03|BARD1	GCTGTGAAAAGAAATCATAG	BARD1	288	1677	0	2048	0	0	1	0	2	4	1	0	0	2348	0	11304	1185
4|CRko|sg_hBARD1_04|BARD1	GTAAAGTTGGTGGTACATCA	BARD1	1329	0	604	1690	0	0	0	0	0	1	0	0	0	0	0	3005	1113
4|CRko|sg_hBARD1_05|BARD1	AAGGCATTGGTGAACACCAC	BARD1	567	4	717	4554	0	0	0	2556	2	1	270	0	0	0	3876	0	1370
4|CRko|sg_hBARD1_06|BARD1	TGAGGACTGGAGATAACAGA	BARD1	3	2690	2152	1094	1	1	0	1	0	3267	2	0	0	0	0	2	1311
4|CRko|sg_hBARD1_07|BARD1	AGTCTCCAGACACTAAGAGC	BARD1	714	377	747	1	0	0	1	2	0	0	728	0	0	0	0	0	1394
4|CRko|sg_hBARD1_08|BARD1	AGCAGCGCAGCAGCTTCTCC	BARD1	645	375	2124	2	0	0	0	0	0	0	1	0	0	0	7891	0	1403
4|CRko|sg_hBARD1_09|BARD1	AACATCTGCAGGAGGACTTG	BARD1	651	1431	857	75	5066	0	2	1	0	1242	0	0	0	1	0	0	1322
4|CRko|sg_hBARD1_10|BARD1	AGGCATTGGTGAACACCACC	BARD1	1806	0	5	1	0	1	0	0	4	0	777	0	0	0	0	29184	1453
4|CRko|sg_hBBC3_01|BBC3	CCAGCGGGAACCCCCCAGGG	BBC3	1292	3417	687	928	3275	0	0	0	1	1353	2204	0	0	0	1	0	1507
4|CRko|sg_hBBC3_02|BBC3	GGCGGGCGGTCCCACCCAGG	BBC3	1317	3753	4418	2601	11383	3	1	2040	6818	1	1560	2	5	2	3	7573	1467
4|CRko|sg_hBBC3_03|BBC3	GTGCCCTCGGCAGTGTCCTG	BBC3	1197	3019	5	4385	0	0	0	1	1	0	1	0	0	6064	0	1	1444
4|CRko|sg_hBBC3_04|BBC3	TGCTCCGCCAGCGAGAGCGA	BBC3	607	712	653	2	1	0	0	1	0	0	1535	0	0	0	0	0	1032
4|CRko|sg_hBBC3_05|BBC3	ACACTGCCGAGGGCACCAGG	BBC3	1657	3528	6218	21	8934	3	8851	2684	2	2	469	3	31546	5554	9296	2	1747
4|CRko|sg_hBBC3_06|BBC3	AGGCCAGCGGGAACCCCCCA	BBC3	802	3087	3276	3648	1	0	0	0	1	2	1121	1	7302	2246	0	0	1741
4|CRko|sg_hBBC3_07|BBC3	GGGGCGCAGAGGTAGGCAGC	BBC3	1600	1843	6274	3891	0	0	0	1	3	4182	695	0	1983	0	0	10772	1713
4|CRko|sg_hBBC3_08|BBC3	CAGCCAGGCCGGGCTCGCAG	BBC3	3125	1046	5348	2053	1	0	0	0	2	0	407	0	2	4280	0	0	1638
4|CRko|sg_hBBC3_09|BBC3	AGGCGGCCCCGGGAGTCCGC	BBC3	380	3084	1100	4344	0	0	1	0	2	2773	1313	0	1	0	6302	0	1588
4|CRko|sg_hBBC3_10|BBC3	GACCGCCCGCCAGAGCCCCC	BBC3	1484	1548	2892	925	1047	7223	0	0	2193	3	486	0	1	1	2	1	1845
4|CRko|sg_hBBS9_01|BBS9	AATATGGCAGAAAACAACTT	BBS9	442	2644	2829	1746	0	0	0	0	0	0	0	0	0	1861	0	0	1187
4|CRko|sg_hBBS9_02|BBS9	AATTTACATTGGATAACTCG	BBS9	0	2101	454	135	1	0	1	2972	0	0	0	1	14751	0	1	1	1111
4|CRko|sg_hBBS9_03|BBS9	GTAGCTTTATGGGATACCTA	BBS9	1	932	4291	0	2	11648	1	1	4	1	1594	1	5127	1	6601	2131	1174
4|CRko|sg_hBBS9_04|BBS9	GTCAGTTCCCACCTCAACAT	BBS9	2404	699	643	1534	6	4	31315	6	2	4	4	1	3	2739	2527	1	1354
4|CRko|sg_hBBS9_05|BBS9	GGAATCTGTACGGGAACTGT	BBS9	791	2377	2182	1356	3098	0	0	1	0	1	0	0	0	0	0	0	1384
4|CRko|sg_hBBS9_06|BBS9	GTGGATTGGACTCTAAATAT	BBS9	897	2506	2379	1688	0	1	1	0	0	4097	0	2	1	1	7639	3581	1117
4|CRko|sg_hBBS9_07|BBS9	TACACCACCAAATGATCCAT	BBS9	555	1402	2	1105	1	1	1	2	2	4701	0	0	2	2228	0	4040	1304
4|CRko|sg_hBBS9_08|BBS9	AGGTACCGAAATGCTACATT	BBS9	49	2070	1978	1295	0	1	0	2	3	0	0	0	1	3642	0	2858	1402
4|CRko|sg_hBBS9_09|BBS9	ACTTGCAGTGTTCATACCTG	BBS9	1076	3606	5563	1202	3731	0	1	1	0	0	1600	0	0	11	0	2	1361
4|CRko|sg_hBBS9_10|BBS9	CAGTCAGTCAGATGATGATC	BBS9	2083	2046	5109	780	1	6442	1	1	2	2	1516	1	0	3	1	1	1307
4|CRko|sg_hBCAT2_01|BCAT2	AAATGTCTTCCCAAACACCA	BCAT2	2210	825	2363	1449	1477	4	2	1	1	1	1	0	14114	4999	0	1	1154
4|CRko|sg_hBCAT2_02|BCAT2	ACGAACAGGAGCGCGCGCGT	BCAT2	1902	1766	1481	62	1	0	2	1	0	1	1489	1	0	2796	5104	4198	1475
4|CRko|sg_hBCAT2_03|BCAT2	GGTCGGGCCCATACAGCCAG	BCAT2	879	3611	2179	5598	3275	0	2	3	6059	3	0	0	0	3789	0	5550	1654
4|CRko|sg_hBCAT2_04|BCAT2	TCGGCAACTACAAGTTAGGT	BCAT2	1521	1673	914	1288	1	0	1	1	3721	3390	606	0	0	2509	0	12651	1321
4|CRko|sg_hBCAT2_05|BCAT2	ATCCGGTCCATGTTGAGCCA	BCAT2	883	2095	2451	795	1	0	0	0	1	0	844	0	0	2390	0	8901	1413
4|CRko|sg_hBCAT2_06|BCAT2	GATGGTGGAATGGAATGACA	BCAT2	1	2053	1842	3004	17	0	0	1	2361	0	815	0	0	1	1	0	1329
4|CRko|sg_hBCAT2_07|BCAT2	GGGGCTGTGAACAGGTCCTC	BCAT2	10	143	4625	482	3	2092	2574	0	0	1	0	0	0	3971	1	4740	1453
4|CRko|sg_hBCAT2_08|BCAT2	CCACCTGCAGGGAGTAGTGG	BCAT2	2418	1611	5589	2198	0	2	0	1780	859	0	1	8843	1	1	0	0	1420
4|CRko|sg_hBCAT2_09|BCAT2	AGTTGCTGGAGTGCATCCGC	BCAT2	3022	1576	3138	20	11214	1	0	1	2	1	3	1	1	5260	1	0	1429
4|CRko|sg_hBCAT2_10|BCAT2	TCTGTCCCTTGGCTTCTGTG	BCAT2	824	1304	1095	3876	1	0	0	0	2	0	0	0	0	0	1	4678	1299
4|CRko|sg_hBCKDHB_01|BCKDHB	AATTCCTTGTTCACACAATG	BCKDHB	1182	1522	2925	1656	1	1	0	0	1	0	0	0	0	0	0	0	1165
4|CRko|sg_hBCKDHB_02|BCKDHB	CAAGTATCGCTATCGCTCTG	BCKDHB	1453	2436	2934	1050	0	0	0	0	0	1	0	0	0	0	0	0	1359
4|CRko|sg_hBCKDHB_03|BCKDHB	GGCCGCATCCTCGACAGTCG	BCKDHB	1	1401	3832	882	0	0	1	0	4245	3	1	0	1	1	1	10267	1663
4|CRko|sg_hBCKDHB_04|BCKDHB	TTTGGCCAATGAGTTATCCA	BCKDHB	971	843	2084	1396	0	0	1	1	1	0	2693	0	0	1	0	3403	1161
4|CRko|sg_hBCKDHB_05|BCKDHB	CCCAGAGCGATAGCGATACT	BCKDHB	511	2858	2324	1171	0	0	0	0	1	0	406	0	1	0	8759	1	1187
4|CRko|sg_hBCKDHB_06|BCKDHB	GTTGGCTTGCGAGACAAATA	BCKDHB	728	2888	1	619	0	1	1	2	1440	1	1	1	0	1	9955	2	1236
4|CRko|sg_hBCKDHB_07|BCKDHB	CAGGGCTCACCGTACTCCCG	BCKDHB	537	3036	146	1760	0	1	1	1	0	4187	1	1	1	3020	8084	1	1541
4|CRko|sg_hBCKDHB_08|BCKDHB	GGATGTTGTATGGTTCTATA	BCKDHB	0	2420	2280	3134	5563	0	2	4354	1	7477	1502	1	3	0	9033	4849	1110
4|CRko|sg_hBCKDHB_09|BCKDHB	ATATCAGGGTTACCTGCAGT	BCKDHB	1718	2521	5515	882	1	1	0	1983	0	1	0	0	1	2962	1	1	1259
4|CRko|sg_hBCKDHB_10|BCKDHB	GCATGACAAAAGAAGTCCTT	BCKDHB	793	1118	2	1018	0	0	0	2	167	1	0	0	0	2860	0	0	1299
4|CRko|sg_hBCL2L12_01|BCL2L12	AGTTTGTACGAGTTCAGTGG	BCL2L12	226	1464	4468	864	0	0	1	2	3	2	997	19548	407	0	2	0	1288
4|CRko|sg_hBCL2L12_02|BCL2L12	CAGAGAAGGAAGCCATACTG	BCL2L12	1125	2091	2365	22	4074	1	0	2	4108	0	0	0	19561	3922	3	7004	1521
4|CRko|sg_hBCL2L12_03|BCL2L12	CAGGCTCTAAACCATAGCAG	BCL2L12	1310	3655	3721	5	1	2	105	2655	1	0	1	1	0	0	1	0	1222
4|CRko|sg_hBCL2L12_04|BCL2L12	CCGGCCCAGCGTAGAAAGGG	BCL2L12	1101	2736	1289	535	1	0	2	2	0	3	822	9544	4205	1	1	0	1528
4|CRko|sg_hBCL2L12_05|BCL2L12	GGCAGAAGTCATTAACCAGA	BCL2L12	3661	4997	5480	2538	0	2	0	2	1	4	1	1	0	8104	1	2	1423
4|CRko|sg_hBCL2L12_06|BCL2L12	GGGCGAAAGAGTCGGAGGAC	BCL2L12	2608	379	1489	2516	5046	0	0	3607	1	1	1230	0	4922	3266	0	1	1529
4|CRko|sg_hBCL2L12_07|BCL2L12	TACTCCAGACTTCTATGCTT	BCL2L12	1892	0	1674	1	2	1	1	2826	0	2	0	0	3	1	0	3983	1185
4|CRko|sg_hBCL2L12_08|BCL2L12	CTGAAATCTCCGCCCAGCCC	BCL2L12	1316	1592	2527	643	0	4	1	2	1793	3	413	0	0	1	5967	8917	1309
4|CRko|sg_hBCL2L12_09|BCL2L12	AGGCGGCTCAGGAAGTCTGT	BCL2L12	836	676	2472	43	2	0	2	1113	0	1	2	1	1	7060	9698	1	1595
4|CRko|sg_hBCL2L12_10|BCL2L12	AAGGCCGAGGGGACTCAGAG	BCL2L12	2628	4299	4447	898	3	10062	0	3	0	3	1731	6186	1	4495	6802	5622	1467
4|CRko|sg_hBCL2L13_01|BCL2L13	ATTTGTCGTAGCAAAACCAG	BCL2L13	1506	1107	4	13	0	0	0	0	0	1	750	0	1	5349	1	3789	1194
4|CRko|sg_hBCL2L13_02|BCL2L13	GCAGAGTACATCATTCAGCA	BCL2L13	2177	2923	4797	1193	5	2	6024	3	2	3057	1	0	4907	3463	24574	1305	1253
4|CRko|sg_hBCL2L13_03|BCL2L13	GTCCTGGCAGCAGATTGCAA	BCL2L13	923	3395	2052	302	0	0	1093	1	0	2	1264	2	0	0	8647	0	1354
4|CRko|sg_hBCL2L13_04|BCL2L13	TGGCTAGCTGACAGTGACAC	BCL2L13	588	2675	2249	231	6239	0	2	5947	1	2	0	0	1	5498	4859	4080	1501
4|CRko|sg_hBCL2L13_05|BCL2L13	GGCATTTCGGGAATGTACAC	BCL2L13	312	1915	674	915	0	0	0	2311	1	1	316	0	1	0	0	724	1427
4|CRko|sg_hBCL2L13_06|BCL2L13	GTGACGGTCAAAGCCTGTGC	BCL2L13	2024	1547	1875	934	2	0	0	2	1	0	0	0	0	0	0	0	1557
4|CRko|sg_hBCL2L13_07|BCL2L13	AAGCCAAAGATAATACCTTG	BCL2L13	1744	988	467	177	3065	0	1	1	2103	3	0	0	0	0	0	0	1274
4|CRko|sg_hBCL2L13_08|BCL2L13	ATCCTGCCCAGCGACAACTC	BCL2L13	2171	1692	2536	1345	0	0	0	1	1	0	0	0	1141	0	7196	0	1366
4|CRko|sg_hBCL2L13_09|BCL2L13	GAGAAAGAAGAGGTGCCCGA	BCL2L13	3246	1542	3157	1995	0	0	2	1	1	2	1495	0	0	4846	0	2	1540
4|CRko|sg_hBCL2L13_10|BCL2L13	GACTCAGGGCCTAGTGACAC	BCL2L13	2044	2	1059	882	6484	1	1	2	2	3	1	0	2135	0	3791	0	1445
4|CRko|sg_hBCLAF1_01|BCLAF1	AGACGACCTTATGGGTACAG	BCLAF1	2043	1152	3	2	1	1	1	4977	2	0	0	0	0	1	2	1	1387
4|CRko|sg_hBCLAF1_02|BCLAF1	ATTCATCGATAGACTCAGAT	BCLAF1	25	2966	1487	1188	1	1	0	0	0	4	0	0	0	0	0	0	1197
4|CRko|sg_hBCLAF1_03|BCLAF1	GCTTGATAGGGGTAATACCA	BCLAF1	1029	2280	3932	1511	1	0	2	1918	3903	0	702	0	1	0	0	0	1164
4|CRko|sg_hBCLAF1_04|BCLAF1	TAAAGAGACTGGATATGTAG	BCLAF1	540	0	939	167	2	0	0	1	0	6664	1	0	1	1	0	1753	1056
4|CRko|sg_hBCLAF1_05|BCLAF1	AAGGCCAGGCCAAATATCAC	BCLAF1	1767	1	1248	526	0	1	0	1	2545	399	1	0	1917	2566	0	3711	1352
4|CRko|sg_hBCLAF1_06|BCLAF1	GAACGTGAACGACCTCGTCT	BCLAF1	1	990	1436	1	0	0	0	0	0	0	1125	0	0	0	3988	2446	1473
4|CRko|sg_hBCLAF1_07|BCLAF1	AAGTCAGTCCTCGCAGATCA	BCLAF1	1	1841	321	2	0	1	0	0	0	0	0	0	0	0	0	0	1231
4|CRko|sg_hBCLAF1_08|BCLAF1	TAATGTGGTCAAAGATGGAT	BCLAF1	1889	558	568	1383	3273	0	1	1339	1	0	0	0	0	0	0	0	1113
4|CRko|sg_hBCLAF1_09|BCLAF1	ATGGAATGTGAATGCTGAGA	BCLAF1	2006	1235	2773	886	3	1	8736	3	1	3	3	0	0	2	1	1	1220
4|CRko|sg_hBCLAF1_10|BCLAF1	TCCCCCTCTACACAAGAATC	BCLAF1	0	1	933	67	0	0	0	0	0	0	0	0	0	0	0	0	1183
4|CRko|sg_hBDNF_01|BDNF	TAAGGGCCCGCACGTACGAC	BDNF	1526	2788	2413	333	0	1	0	1	1666	0	0	0	1	1843	3811	2	1504
4|CRko|sg_hBDNF_02|BDNF	GAACTACCCAGTCGTACGTG	BDNF	1172	1163	92	7707	0	0	1	0	2	2	1352	0	0	2433	0	0	1425
4|CRko|sg_hBDNF_03|BDNF	TGTGTACCTCCACGTTTCAG	BDNF	1194	1093	4490	2426	5079	3	0	1	0	1	0	0	0	2672	6746	3820	1425
4|CRko|sg_hBDNF_04|BDNF	TCTACCCACACGCTTCTGTA	BDNF	1922	308	1681	3	1	2	2	1	1	6971	4	0	16041	3482	4162	0	1240
4|CRko|sg_hBDNF_05|BDNF	TTGACTACTGAGCATCACCC	BDNF	0	4139	1784	2588	1	1	7426	2	6	2	811	0	0	10066	0	0	1309
4|CRko|sg_hBDNF_06|BDNF	GTGTGACAGTATTAGTGAGT	BDNF	2025	1173	1473	455	2	8974	0	1	0	0	751	0	17129	3201	3	1721	1157
4|CRko|sg_hBDNF_07|BDNF	TGCTGCAAACATGTCCATGA	BDNF	1934	3529	1553	1281	4462	0	1	0	2	0	1116	0	1	1	5273	0	1303
4|CRko|sg_hBDNF_08|BDNF	AAGACTGCAGTGGACATGTC	BDNF	1094	2493	6593	4273	3235	2	8	8	2	4	784	0	1	0	5	2	1381
4|CRko|sg_hBDNF_09|BDNF	GGACTCTGGAGAGCGTGAAT	BDNF	2919	1667	1767	251	0	9412	6146	9	4	4	2	1	2	7418	2	2	1396
4|CRko|sg_hBDNF_10|BDNF	ACGCAGACTTGTACACGTCC	BDNF	2419	1615	5237	1537	1	1	1	2573	5	0	973	0	9722	0	6391	0	1563
4|CRko|sg_hBET1_01|BET1	ACTATGGCTATGCTAATAGT	BET1	386	731	2476	698	4669	0	1	3	1	0	0	0	1	0	1	1568	1208
4|CRko|sg_hBET1_02|BET1	GAGTACCTCCTGGCAACTAT	BET1	1672	2617	2872	724	3	0	2	2	0	402	1105	0	7994	0	8002	6644	1256
4|CRko|sg_hBET1_03|BET1	TTCAGCTAATAATTTATTCT	BET1	694	555	3622	240	0	1	1	0	0	0	1141	0	0	0	0	1795	952
4|CRko|sg_hBET1_04|BET1	TTTACCTAGAAATCCAGTTG	BET1	1	340	1616	251	0	0	0	0	0	0	0	0	0	1	4322	1	1064
4|CRko|sg_hBET1_05|BET1	TAGTTCCCATAGTTGCCAGG	BET1	548	3	1437	4555	0	2	1	2	0	6080	1	0	2	0	1	0	1341
4|CRko|sg_hBET1_06|BET1	CCTGTGAAGAAGAAAATGAG	BET1	370	1795	2600	1351	0	1	0	1	0	0	576	0	1	0	1	5574	1145
4|CRko|sg_hBET1_07|BET1	GCAGGTGAAGGAGTACCTCC	BET1	1648	590	874	2684	0	0	0	0	2245	0	0	1	0	0	0	0	1485
4|CRko|sg_hBET1_08|BET1	TCTGGCAGGATGAGGCGTGC	BET1	234	1750	2	121	0	0	1	0	2178	0	859	0	8513	2829	0	0	1539
4|CRko|sg_hBET1_09|BET1	AACTATGGCTATGCTAATAG	BET1	2	1387	1528	3	1	0	0	0	0	198	919	0	0	0	0	1	1061
4|CRko|sg_hBET1_10|BET1	GGAGTACCTCCTGGCAACTA	BET1	1225	10	571	59	0	1	2	4257	0	1	1146	0	1	2780	0	0	1351
4|CRko|sg_hBIRC2_01|BIRC2	ATATTCAACTTTCCCCGCCG	BIRC2	1	460	38	1066	0	0	0	1	2	0	667	0	0	0	0	3798	1342
4|CRko|sg_hBIRC2_02|BIRC2	ATGCTATGTCAGAACACCGG	BIRC2	1166	1432	3636	2	0	3	1	1	0	2	1855	0	0	1	0	1345	1364
4|CRko|sg_hBIRC2_03|BIRC2	CAAGCTACTATGTTCCAAGG	BIRC2	860	1930	555	1303	3	1	25804	9	6	10	4	0	9430	3	2	3	1321
4|CRko|sg_hBIRC2_04|BIRC2	TACTCATTGCATAACTGTAG	BIRC2	3730	1345	2509	1007	2	0	0	0	0	391	0	0	0	1	0	0	1188
4|CRko|sg_hBIRC2_05|BIRC2	ATGATGCTATGTCAGAACAC	BIRC2	1	468	4	1139	1	0	1	1	2	1	604	0	1	2	1	0	1281
4|CRko|sg_hBIRC2_06|BIRC2	AGTTAATGGCCACATATGGT	BIRC2	1105	748	4499	2196	24	0	0	6660	0	1	1601	0	0	0	1	1446	1211
4|CRko|sg_hBIRC2_07|BIRC2	AGACATTCTGTAGAGTTCAC	BIRC2	1212	1558	866	2923	1	8927	0	0	0	458	1	0	0	1	1	1161	1373
4|CRko|sg_hBIRC2_08|BIRC2	TTCTGAATAAAGCTACAGCT	BIRC2	619	2690	708	325	2	1	1966	0	2	3	1689	0	0	0	0	6852	1147
4|CRko|sg_hBIRC2_09|BIRC2	GAATGAGAACATTTATGTAC	BIRC2	113	1246	1995	1210	0	0	0	0	0	0	0	0	0	0	0	0	1120
4|CRko|sg_hBIRC2_10|BIRC2	GAGTTCTTGATACGAATGAA	BIRC2	548	1205	1863	206	2	3	0	0	0	219	0	2	0	6638	1	3014	1140
4|CRko|sg_hBLM_01|BLM	CCAACACCACAAATCAGCAA	BLM	2894	3850	512	3689	1	7467	374	3	4	2	1854	1	1	4302	0	1	1334
4|CRko|sg_hBLM_02|BLM	CGTGCAACAACTTACACCTG	BLM	4001	3429	1551	97	6991	2	3	4	3	3	1074	0	5743	1968	2	2592	1581
4|CRko|sg_hBLM_03|BLM	GCCTATCAACCCATCAAGGA	BLM	1126	609	1398	1	2	0	0	2621	0	1	64	7513	8463	2	1	1	1187
4|CRko|sg_hBLM_04|BLM	TCTACGATAAGTGATCTCAA	BLM	0	562	1280	1589	0	0	0	0	0	0	1112	0	0	0	0	0	1096
4|CRko|sg_hBLM_05|BLM	TTACGGCCACAGCTAATCCC	BLM	1	1	1	56	1	0	0	3550	0	0	0	1	2	0	8373	1	1323
4|CRko|sg_hBLM_06|BLM	GAAATGACAACAGTGACCCC	BLM	931	2567	1720	2721	4151	0	0	1	2	1	1	0	5273	1	0	9631	1546
4|CRko|sg_hBLM_07|BLM	TGCTTCAGCAGCGGAACATA	BLM	543	3	2	2	1	0	0	2700	0	0	0	0	0	0	0	2469	1281
4|CRko|sg_hBLM_08|BLM	TGGGCTGAAACACCAAGACT	BLM	1214	737	3043	1218	1	1	2	3	3395	3104	0	1	0	1	4609	1530	1323
4|CRko|sg_hBLM_09|BLM	GAGTCAATTCAGAATTATAC	BLM	1423	1229	3603	0	24	0	1	1	2	1	0	0	1	0	6965	1	1128
4|CRko|sg_hBLM_10|BLM	GTTGGGTAGAGGTTCACTGA	BLM	2243	1142	2609	365	2	3	2	4	1	2170	1	9857	1	1	221	0	1345
4|CRko|sg_hBNIP2_01|BNIP2	AACTCATTACTATTCTCTGA	BNIP2	2669	1977	996	20	0	1	1	803	1	1	843	0	1	1	1	0	1128
4|CRko|sg_hBNIP2_02|BNIP2	CGGGATGTTATCACTTCCGC	BNIP2	1625	1273	3130	989	5802	1	0	0	0	1	736	0	0	0	0	1622	1273
4|CRko|sg_hBNIP2_03|BNIP2	TCCAGACATTAGCCTGACAC	BNIP2	627	1593	718	1026	1	0	0	1	2	0	773	0	6935	0	1	1	1279
4|CRko|sg_hBNIP2_04|BNIP2	CCAGGCTCACTAGAAGTTAA	BNIP2	3896	1944	501	38	1	0	0	1946	0	3	1	0	1	1	4345	0	1172
4|CRko|sg_hBNIP2_05|BNIP2	ACAGACAGCAAACACAACAA	BNIP2	779	1207	1338	1029	3144	0	1	0	1	4	1	2	8860	1	0	1	1372
4|CRko|sg_hBNIP2_06|BNIP2	GAATAGTAATGAGTTTGAGT	BNIP2	511	241	3072	1501	1	1	0	3105	1	2493	1	0	0	0	2	0	1168
4|CRko|sg_hBNIP2_07|BNIP2	TCCAGTGTCAGGCTAATGTC	BNIP2	918	1590	2891	4	0	2	1	2839	1316	0	0	0	0	2700	0	1	1227
4|CRko|sg_hBNIP2_08|BNIP2	GGATTGGAGAACAGGACCAC	BNIP2	1191	3522	1522	1044	2844	1	0	2303	2797	2	611	1	0	1	0	1260	1463
4|CRko|sg_hBNIP2_09|BNIP2	GCCTAACTATAGATACCTGA	BNIP2	1651	3895	1602	5919	3	0	2	0	1	1687	2	0	0	0	4330	1079	1338
4|CRko|sg_hBNIP2_10|BNIP2	TCCATCAGGTATCTATAGTT	BNIP2	217	1728	410	1	0	0	0	0	0	0	0	0	1	0	4900	1	980
4|CRko|sg_hBOLA1_01|BOLA1	CTCCAACTTCGTGCGAATGG	BOLA1	1247	1331	3800	752	3199	0	0	3	1	1	54	0	0	5385	0	1	1405
4|CRko|sg_hBOLA1_02|BOLA1	GAGCTTCGCAACGAGAGCGG	BOLA1	1480	3909	1867	1035	1	0	0	2	0	1	648	0	0	5290	0	7144	1493
4|CRko|sg_hBOLA1_03|BOLA1	TGAGCCCCCTACAACGACAC	BOLA1	442	3087	4039	1088	0	0	0	0	0	0	0	0	0	0	0	0	1453
4|CRko|sg_hBOLA1_04|BOLA1	TGCGAAGCTCTAGCACCTCG	BOLA1	1732	1519	2701	1008	1	1	2	2	0	2	579	1	11347	0	2	1	1487
4|CRko|sg_hBOLA1_05|BOLA1	GTGGTGAGCTCTCGTTTCGA	BOLA1	915	4064	563	4367	11	0	0	3276	0	2	0	0	1	0	0	1	1354
4|CRko|sg_hBOLA1_06|BOLA1	GGGATCCGGGGCCATCGGTC	BOLA1	1768	1028	2823	1287	9378	1	1	3	0	1	1004	16771	0	2	0	2	1429
4|CRko|sg_hBOLA1_07|BOLA1	GTTGCGAAGCTCTAGCACCT	BOLA1	333	2672	2801	4103	0	0	2515	0	1	1	1	0	0	2	0	0	1364
4|CRko|sg_hBOLA1_08|BOLA1	CAGTGAGACTCACTTCCGCG	BOLA1	3	1266	1664	1644	1	0	0	1	1	2	0	0	1	0	0	0	783
4|CRko|sg_hBOLA1_09|BOLA1	GGACCAGCCGGTGTCGTTGT	BOLA1	5	1099	2176	1088	2	3177	0	1	0	2	0	0	0	0	1	0	1205
4|CRko|sg_hBOLA1_10|BOLA1	GAGAGCTCACCACAGCCACG	BOLA1	314	1410	2479	915	0	0	0	0	2	0	1	0	0	6605	4446	9207	1758
4|CRko|sg_hBORA_01|BORA	AGACTTCAGATGTATAGTGG	BORA	2	1664	697	1387	0	0	0	1	0	1	799	0	0	0	0	0	1142
4|CRko|sg_hBORA_02|BORA	GATGTTTGAACACCACTGTG	BORA	512	408	2	917	0	0	0	0	0	2	2578	0	0	1	2	0	1293
4|CRko|sg_hBORA_03|BORA	TGGAGATTAGAATAATCACT	BORA	508	0	2237	822	1	0	0	0	0	0	121	0	0	0	0	0	1122
4|CRko|sg_hBORA_04|BORA	TTATGAGACATACCTGAGAG	BORA	1094	2294	632	1233	0	3	0	1	1	1	1	0	0	2195	1	0	1180
4|CRko|sg_hBORA_05|BORA	ATAGTGGTGGTACTCAGTAT	BORA	1	82	523	0	4890	0	0	2	0	1	2434	0	0	0	1	910	1136
4|CRko|sg_hBORA_06|BORA	GTATAGAATAGATAAAGATG	BORA	0	267	1	378	0	0	0	0	0	0	0	0	0	0	0	0	1123
4|CRko|sg_hBORA_07|BORA	ATATAAGGACTTCTGATACA	BORA	1188	1292	696	1	0	1	0	890	1	0	0	0	0	0	0	0	1131
4|CRko|sg_hBORA_08|BORA	AGAAGCCGAAGGTAAGGAGT	BORA	560	1569	1630	3301	1	0	1	1	0	0	648	12285	0	0	0	0	1460
4|CRko|sg_hBORA_09|BORA	GAGAAAGTGGGTGAAGAAAT	BORA	551	3	2962	1129	0	0	0	3561	1	0	0	0	0	0	1	0	1148
4|CRko|sg_hBORA_10|BORA	ATGAGACTTCAGATGTATAG	BORA	0	526	440	857	2	3	1	1929	5	8274	1	2	0	2	1	0	1185
4|CRko|sg_hBRAT1_01|BRAT1	AGCCCGCCAGGGTCCCACAG	BRAT1	555	3477	6521	1543	0	0	0	1823	0	0	418	0	0	0	0	2813	1432
4|CRko|sg_hBRAT1_02|BRAT1	ATCCCCACCACCGTACCGTG	BRAT1	2400	2072	1675	1744	1	1	0	4706	2	3	1578	0	0	0	9079	1	1637
4|CRko|sg_hBRAT1_03|BRAT1	CCACGAACGAGTGTGCGGCG	BRAT1	416	1961	3283	2150	0	0	1	1	0	1	0	0	5812	6560	1	1	1250
4|CRko|sg_hBRAT1_04|BRAT1	GACGGCAGACGATGCCACGA	BRAT1	744	2224	2205	2479	1299	0	1	3029	2	417	1	0	0	5248	1	0	1854
4|CRko|sg_hBRAT1_05|BRAT1	CAGCACAGGGAACAGCTCTA	BRAT1	2018	1957	3891	1660	1	2	3	2047	4421	2690	2445	0	0	1	0	2336	1371
4|CRko|sg_hBRAT1_06|BRAT1	ATGATCTTCTGGGCACACGC	BRAT1	1235	1905	4815	180	0	0	0	0	1882	0	1	0	1	139	1	0	1396
4|CRko|sg_hBRAT1_07|BRAT1	GGATCCTGAAGCTCGAGCAC	BRAT1	1034	2830	2420	452	0	0	1	0	0	1	2	0	5005	7016	1	7385	1451
4|CRko|sg_hBRAT1_08|BRAT1	AGGAGAGGACCCCAGAACTC	BRAT1	0	14	157	0	0	0	934	2	2882	0	1093	0	2	2	0	0	1412
4|CRko|sg_hBRAT1_09|BRAT1	AGATGGTGTCGACCGCACCT	BRAT1	982	878	1349	541	380	0	1	1	0	1	1214	0	0	3327	1	5207	1456
4|CRko|sg_hBRAT1_10|BRAT1	GTCCACGAACGAGTGTGCGG	BRAT1	1584	1146	1715	1730	3576	1775	1	0	0	0	1964	0	1	0	4683	0	1545
4|CRko|sg_hBRCA1_01|BRCA1	AAGGAGCCAACATAACAGAT	BRCA1	362	693	796	130	2	5588	1	0	2277	1	790	0	0	1	1	0	1240
4|CRko|sg_hBRCA1_02|BRCA1	AGAAACCTACAACTCATGGA	BRCA1	267	142	711	24	2	0	0	1145	0	0	0	0	3884	0	1	0	1267
4|CRko|sg_hBRCA1_03|BRCA1	GGCTCAGGGTTACCGAAGAG	BRCA1	1541	1184	1240	1	0	8952	0	0	2	0	870	0	0	5174	1	1	1358
4|CRko|sg_hBRCA1_04|BRCA1	TGGTACTGATTATGGCACTC	BRCA1	481	2065	4	4514	0	0	0	1668	0	0	0	0	0	0	0	2698	1274
4|CRko|sg_hBRCA1_05|BRCA1	AAAGTGGTGGTATACGATAT	BRCA1	1	279	201	0	0	0	0	1	1	0	0	0	0	1	0	1	1095
4|CRko|sg_hBRCA1_06|BRCA1	GATAACTTAGAACAGCCTAT	BRCA1	1	436	652	2705	1	1	0	1	1	1	0	0	0	0	0	1	1331
4|CRko|sg_hBRCA1_07|BRCA1	ACATGAAGTTAACCACAGTC	BRCA1	293	0	2928	2596	0	0	0	0	0	3255	0	0	0	0	1	0	1298
4|CRko|sg_hBRCA1_08|BRCA1	TCAGTTACATGGCTTAAGTT	BRCA1	692	3	3594	0	0	0	0	1	3152	0	1	1	0	0	0	0	1143
4|CRko|sg_hBRCA1_09|BRCA1	GGTTTCTGTAGCCCATACTT	BRCA1	1145	1391	882	6	0	0	0	1	0	1	1632	0	0	0	3162	0	1326
4|CRko|sg_hBRCA1_10|BRCA1	GAATGCTATGCTTAGATTAG	BRCA1	0	3337	1541	0	0	0	1	0	1	1	450	0	0	0	0	0	1216
4|CRko|sg_hBRCA2_01|BRCA2	AAAATGTCAGACAAGCTCAA	BRCA2	1280	0	1413	0	0	0	0	0	0	0	0	0	0	0	0	0	1220
4|CRko|sg_hBRCA2_02|BRCA2	AATTATGGCAGGTTGTTACG	BRCA2	2047	474	646	1	1	1	1	2468	1	0	2	8081	0	1	0	16451	1289
4|CRko|sg_hBRCA2_03|BRCA2	AGCACAGTAGAACTAAGGGT	BRCA2	331	1	1019	961	1	0	0	0	0	1	818	0	0	0	0	0	1373
4|CRko|sg_hBRCA2_04|BRCA2	GTCTACCTGACCAATCGATG	BRCA2	49	1661	2136	794	0	1	0	2651	0	0	817	0	0	1	0	1	1274
4|CRko|sg_hBRCA2_05|BRCA2	GAACTTGACCAAGACATATC	BRCA2	694	421	1496	1006	0	0	0	2886	0	0	23	0	0	0	0	5511	1273
4|CRko|sg_hBRCA2_06|BRCA2	TGTGTCTCCATATAAAACCA	BRCA2	576	269	2656	309	0	1	0	1	1	1	0	0	0	0	0	0	1073
4|CRko|sg_hBRCA2_07|BRCA2	AAGTTCCTTACACAAAGTTA	BRCA2	3245	2009	1243	635	0	0	0	0	0	0	0	0	0	0	0	0	1058
4|CRko|sg_hBRCA2_08|BRCA2	GTATGAAAACCCAATAGAGT	BRCA2	798	1138	2120	6505	0	1	0	0	0	0	367	0	0	5278	1	0	1113
4|CRko|sg_hBRCA2_09|BRCA2	TAATAATACAGTAATCTCTC	BRCA2	0	413	410	32	0	0	0	0	0	0	0	0	1	0	0	0	942
4|CRko|sg_hBRCA2_10|BRCA2	ATAAATACTGCAGATTATGT	BRCA2	406	2254	8218	1467	1	0	1	0	0	0	750	0	0	0	0	0	1075
4|CRko|sg_hBRD8_01|BRD8	AGGAGGTGATTATCCACTTG	BRD8	585	1713	1250	1339	0	0	1	3	0	3570	0	1	0	8000	2	0	1356
4|CRko|sg_hBRD8_02|BRD8	CAGGAGTCAGGACTTAGATG	BRD8	1290	734	603	0	0	0	0	1	0	0	959	0	0	7186	0	0	1312
4|CRko|sg_hBRD8_03|BRD8	GATATTGCTGTGTCTTACAC	BRD8	760	1238	481	585	1	0	1	7135	19	1	539	0	0	0	1	0	1278
4|CRko|sg_hBRD8_04|BRD8	TGGGACACAGACTCTACAGG	BRD8	1	1926	3215	2017	4672	0	0	1	1	0	1	0	1	3331	0	1	1431
4|CRko|sg_hBRD8_05|BRD8	GGAGAGCTGCAGCTAATCAT	BRD8	83	118	1550	2	0	0	0	1	0	1313	2083	4330	0	7034	0	2	1223
4|CRko|sg_hBRD8_06|BRD8	TAAGTACCTATATCTCTCCT	BRD8	928	958	2	537	1	1	1	2120	0	2	758	0	1	4331	1	1	1070
4|CRko|sg_hBRD8_07|BRD8	GGAGAGCGAACCATCACAGT	BRD8	1010	2092	2548	1	1	1	6094	2	3634	2	0	0	1	1	1	0	1549
4|CRko|sg_hBRD8_08|BRD8	GCTTGGGACACAGACTCTAC	BRD8	799	2789	3181	1426	3510	4	2	5124	4298	2	1266	0	2	2227	2	0	1411
4|CRko|sg_hBRD8_09|BRD8	GTATGGAGCCACCAGAACTC	BRD8	1012	635	920	2	1	0	0	4260	1877	0	757	0	0	1	0	0	1321
4|CRko|sg_hBRD8_10|BRD8	GGAGATGCAGCGAGATGTCT	BRD8	2677	1037	628	1800	1	2	1	4287	1	4	1336	2	1	2652	5757	2514	1447
4|CRko|sg_hBRI3_01|BRI3	CAGGATAGCGGGTGACGGTC	BRI3	1667	941	6	1400	104	0	1	0	3899	1	691	0	0	1	4857	0	1366
4|CRko|sg_hBRI3_02|BRI3	TCCTACGACCACGATAGAGT	BRI3	1070	2012	522	531	0	0	2	2	0	0	1496	0	0	2266	0	0	1266
4|CRko|sg_hBRI3_03|BRI3	TTACGGGCCCACCTGTGACG	BRI3	703	2178	3491	1119	0	0	0	0	0	0	0	0	0	0	0	0	1437
4|CRko|sg_hBRI3_04|BRI3	GGGCCCACCTGTGACGAGGT	BRI3	492	1735	2982	532	0	0	0	1	1	1481	1	0	0	2742	0	5854	1537
4|CRko|sg_hBRI3_05|BRI3	ATGGTGGGTGGGTATCCCTG	BRI3	1656	2177	4188	428	0	0	0	0	0	0	0	0	0	0	0	3110	1279
4|CRko|sg_hBRI3_06|BRI3	GGATGGCGCCGTAGCCGTGC	BRI3	421	1196	595	0	1	0	1	0	0	3391	2	0	0	1	1	4007	1625
4|CRko|sg_hBRI3_07|BRI3	GGATGTTGTAGACCCTGGGA	BRI3	663	978	32	450	1	4191	1	3	1	0	3	1	2	3	4454	0	1334
4|CRko|sg_hBRI3_08|BRI3	CGATAGAGTTGGCAGGATAG	BRI3	1192	2057	1383	858	0	0	0	1	0	0	2	1	9986	1884	0	1543	1374
4|CRko|sg_hBRI3_09|BRI3	ACGACCACGATAGAGTTGGC	BRI3	1086	1706	3374	319	1	0	0	2937	0	0	2	1	2	1	5735	1	1668
4|CRko|sg_hBRI3_10|BRI3	ACCCCTACCTCGTCACAGGT	BRI3	1	2189	3303	2205	0	2	0	0	0	1	0	0	0	0	89	1	1446
4|CRko|sg_hBSCL2_01|BSCL2	AATGTCTCGCTGACTAAGGG	BSCL2	1042	3142	55	3	2518	2	0	3	4386	3	1	1	0	1	4258	0	1317
4|CRko|sg_hBSCL2_02|BSCL2	ATTTCCTGCTACACCAGAGG	BSCL2	625	639	1636	0	6437	3	0	1	1	5	1798	13300	1	2	0	1	1255
4|CRko|sg_hBSCL2_03|BSCL2	GATCTCAATGATCGCTCCAG	BSCL2	983	1882	3958	5458	1	1	2533	2121	2	2795	2	2	1	1	1	2	1376
4|CRko|sg_hBSCL2_04|BSCL2	GGGCTGAGGTGGCTGACTGT	BSCL2	2072	1275	2320	2460	0	2	1	0	1	0	0	0	0	0	0	0	1544
4|CRko|sg_hBSCL2_05|BSCL2	TCATCGGGAAGTTGTATAGC	BSCL2	1521	679	1331	1126	1	2	1	2	0	8247	3	0	0	5080	1	4510	1262
4|CRko|sg_hBSCL2_06|BSCL2	GTGGCTGACTGTCGGCATAT	BSCL2	2313	1992	3550	621	2	1	0	2	0	1	1528	1	3	0	6733	4290	1385
4|CRko|sg_hBSCL2_07|BSCL2	ACCCTTAGTCAGCGAGACAT	BSCL2	1156	549	5	2992	1	0	0	0	2	0	946	0	0	2511	0	1437	1287
4|CRko|sg_hBSCL2_08|BSCL2	ACTTACCGAACGCGAAGAAG	BSCL2	571	1124	3172	3	1	0	1	0	0	0	0	0	0	2215	8678	0	1357
4|CRko|sg_hBSCL2_09|BSCL2	TCACAGTACGTGCCGACCAC	BSCL2	517	2248	1922	3443	2	6247	6432	2	1	3	3	1	1	4242	5	736	1510
4|CRko|sg_hBSCL2_10|BSCL2	TCTTGGCAGGCCGTGCCCGC	BSCL2	369	2193	2282	546	0	0	1	1	2085	1	2645	0	2	3380	5155	1	1465
4|CRko|sg_hBTAF1_01|BTAF1	CACATGGCTGCTCGTTGTGT	BTAF1	973	1012	4862	3373	2	5981	3	4066	2394	3	5120	0	0	7034	3	1	1368
4|CRko|sg_hBTAF1_02|BTAF1	GAAAGGATATCAAGTAAACG	BTAF1	20	1223	1435	171	1	0	2	6919	1897	1	0	0	1	6551	2	0	1193
4|CRko|sg_hBTAF1_03|BTAF1	GAACAATGGGAAGTTAGACA	BTAF1	704	770	1931	6148	13657	6	0	25315	3881	4051	1	1	2	12014	3	4	1287
4|CRko|sg_hBTAF1_04|BTAF1	GGTACTGGACATGTGACACA	BTAF1	22	1572	801	1259	1	1	3	3180	3	3	0	1	1	11234	8268	8635	1383
4|CRko|sg_hBTAF1_05|BTAF1	ACAGAGGATTAGTGTAGCTT	BTAF1	1730	1251	3923	593	0	1	2	7083	1	0	686	0	0	3163	1	1	1268
4|CRko|sg_hBTAF1_06|BTAF1	GTAATGGAACAACTAGATGT	BTAF1	1816	162	4	167	879	1	1	8479	1914	1	1899	1	2	13098	0	0	1063
4|CRko|sg_hBTAF1_07|BTAF1	GAGGTATAATTACACTCTAC	BTAF1	288	683	1923	512	6352	2	1	0	2	2	3	0	1	0	1	0	1163
4|CRko|sg_hBTAF1_08|BTAF1	AAAATGTGTCGGAGCATATC	BTAF1	543	669	1378	965	3554	2	1	2	0	0	2226	0	0	2229	2	5719	1291
4|CRko|sg_hBTAF1_09|BTAF1	GCTGGGAATAAAATATGCTT	BTAF1	727	1406	2164	3647	1913	0	1	3330	3114	2	2805	0	1	16574	1	5742	1238
4|CRko|sg_hBTAF1_10|BTAF1	TAGCAATGATAGCACTGATG	BTAF1	3009	1525	3748	410	5649	2	1	2222	0	1	0	0	0	8	0	5098	1304
4|CRko|sg_hBTBD1_01|BTBD1	CGGTCAATGTATTCAACTCG	BTBD1	2506	1687	2963	484	1	0	1	1	0	0	0	0	2235	3934	4460	0	1301
4|CRko|sg_hBTBD1_02|BTBD1	GTTCCCACTGATGACAATTG	BTBD1	2945	2483	2430	1817	3853	1	0	1	1940	0	0	0	0	0	0	0	1282
4|CRko|sg_hBTBD1_03|BTBD1	TGGATGCAATAAGTGCAGAA	BTBD1	1201	1536	2039	3455	0	0	0	0	2	0	1	0	0	3	8002	4054	1158
4|CRko|sg_hBTBD1_04|BTBD1	TTTGACGCCATGTTCAACGG	BTBD1	0	380	638	319	2	2	1095	4105	1	2	4	16382	1	0	0	4599	1309
4|CRko|sg_hBTBD1_05|BTBD1	CACGTCCGGCAGCTCGATCT	BTBD1	3040	4074	1462	923	8333	7338	3	4452	2137	10550	1256	1	4	3688	5	228	1391
4|CRko|sg_hBTBD1_06|BTBD1	AGCGATGTGCGCTTCGTACT	BTBD1	252	329	1	3518	0	2	0	1	0	0	0	0	0	1	0	0	1367
4|CRko|sg_hBTBD1_07|BTBD1	GGCCCCAGAGAGGACGGTGA	BTBD1	3855	3160	5322	920	7143	1	0	2	1	1	788	0	1	1168	1	0	1487
4|CRko|sg_hBTBD1_08|BTBD1	ATTATCTGCCCTAAGATGTT	BTBD1	1636	2673	5	381	0	4547	0	1	0	2	0	0	0	1	2	0	1047
4|CRko|sg_hBTBD1_09|BTBD1	GTTGAACATGGCGTCAAAGA	BTBD1	2134	4270	576	6536	0	0	1	1405	983	1	1	0	2	0	4411	2975	1332
4|CRko|sg_hBTBD1_10|BTBD1	GGCCGCCAGCACGAAGCGGT	BTBD1	723	2507	1456	2	3165	2	1	4829	2276	1	3	0	1	6829	1150	1175	1554
4|CRko|sg_hBTBD10_01|BTBD10	CAGAATCGCTCGAAACACAG	BTBD10	2654	3711	5552	2488	3141	12415	2	2315	3	5	2057	0	1	2	2	13935	1311
4|CRko|sg_hBTBD10_02|BTBD10	CCAACACGACAGCACCATGT	BTBD10	2294	2071	7374	322	2	2	3	0	3	3	1397	2	0	3	7171	0	1595
4|CRko|sg_hBTBD10_03|BTBD10	GAATGTTTATAAAGTTTACG	BTBD10	1058	1971	40	1835	1	57	0	1533	1	1	1542	0	1	4787	1	0	1008
4|CRko|sg_hBTBD10_04|BTBD10	GGTAGCTAGTGCCCAGAGTG	BTBD10	926	708	2980	3869	1	0	0	0	1	0	0	8035	1	1606	0	3005	1467
4|CRko|sg_hBTBD10_05|BTBD10	TGGTAGCTAGTGCCCAGAGT	BTBD10	2489	506	3915	1	22	1	0	2040	10	3	2	0	5453	1	12004	0	1334
4|CRko|sg_hBTBD10_06|BTBD10	TATGAGGTGGCAGAGGGAAT	BTBD10	1326	1957	2510	282	1	1	1	0	1	1	645	0	7246	0	1	0	1185
4|CRko|sg_hBTBD10_07|BTBD10	AGTCTACATGGTGCTAGTGG	BTBD10	2746	2826	1582	1656	1	1	0	3622	0	0	0	0	1	0	6674	0	1426
4|CRko|sg_hBTBD10_08|BTBD10	GCACAGCCAAATACAATGTT	BTBD10	1364	4362	2555	2620	2	1	0	2	5	2	833	3	7062	1	6044	2711	1302
4|CRko|sg_hBTBD10_09|BTBD10	ATGGTTCCATTAGCAGTGCT	BTBD10	1720	2273	4749	742	2	0	0	1	2	3214	3	0	0	0	3772	3	1185
4|CRko|sg_hBTBD10_10|BTBD10	ACATTCCCGTTCCCCACTCT	BTBD10	1050	2980	541	9532	0	0	0	2550	2	0	0	0	4091	2249	1	0	1397
4|CRko|sg_hBTBD2_01|BTBD2	AACTCCTCGATGGTCATGAG	BTBD2	3105	2708	4222	402	3	1	0	4809	6037	2	1	0	1799	972	4	1	1313
4|CRko|sg_hBTBD2_02|BTBD2	CACTGCAGACGCCATCACCG	BTBD2	1481	2457	1305	5098	1	1	0	2	1	0	0	1	2958	2709	4022	1683	1757
4|CRko|sg_hBTBD2_03|BTBD2	CTTCTTGGCGGTGTATAGCG	BTBD2	2	1831	1143	285	0	7767	0	2	2082	1	1	1	1	1435	0	5939	929
4|CRko|sg_hBTBD2_04|BTBD2	GGCCTCGGACCAGCGGACAA	BTBD2	1061	2538	3231	2904	0	0	0	3	0	1	831	0	0	0	0	163	1539
4|CRko|sg_hBTBD2_05|BTBD2	GTTCATCGAAGAGTCGCGCC	BTBD2	1684	2514	2709	0	2	6644	0	0	2163	4975	0	0	1	2	9556	0	1371
4|CRko|sg_hBTBD2_06|BTBD2	GTCGGGCAGCTCAATCTCCG	BTBD2	1809	2610	1550	3802	0	2	5741	3	3599	0	0	2	1	2	2	2	1519
4|CRko|sg_hBTBD2_07|BTBD2	GCCCTTACCCAGGTCAATGT	BTBD2	2	639	1958	1794	2	0	1	0	1	2	0	1	1	4720	6299	6320	1332
4|CRko|sg_hBTBD2_08|BTBD2	GCGAAGCGCTCCTGCACGGT	BTBD2	1314	1149	1405	28	9800	3	1	3	0	1	1054	0	1	2754	0	0	1530
4|CRko|sg_hBTBD2_09|BTBD2	GGTGCAGATTGGCCCGGAGA	BTBD2	1398	1954	1702	1159	0	0	0	0	0	0	0	0	0	0	0	3954	1378
4|CRko|sg_hBTBD2_10|BTBD2	TGACCACCTCGCGGTCCACC	BTBD2	2661	2458	1317	2355	2848	0	0	2237	1	0	719	0	0	0	4168	1	1539
4|CRko|sg_hBTF3_01|BTF3	AACTGCTCGCAGAAAGAAGA	BTF3	43	907	1157	991	3083	1	8841	0	3	0	812	1	4130	2	4	2	1178
4|CRko|sg_hBTF3_02|BTF3	CTGCAGGCACAAGTGCGCAT	BTF3	0	592	1475	702	0	1	4071	1	0	1	0	0	0	2	0	0	1688
4|CRko|sg_hBTF3_03|BTF3	TCAGCTGCTTTGTCTCAGCA	BTF3	0	470	604	1	0	0	0	1	1106	0	1067	0	0	0	0	2991	1364
4|CRko|sg_hBTF3_04|BTF3	TTAGGGGTAAACAATATCTC	BTF3	1	0	2	0	241	0	0	0	1	287	0	0	0	0	0	0	966
4|CRko|sg_hBTF3_05|BTF3	ACAGCGTCGCCTCGCCCCCA	BTF3	2467	405	1586	6357	3	6	8866	3	4459	1	1	9246	2	0	2	0	1415
4|CRko|sg_hBTF3_06|BTF3	TCAGACTATCCGCACCAAGC	BTF3	1	346	3596	657	2	0	3106	0	1	0	0	0	1	0	1	0	1360
4|CRko|sg_hBTF3_07|BTF3	ACATTGTTTGGGCAGAGCTT	BTF3	769	2128	13	726	0	0	0	0	0	1	0	0	0	0	0	0	1144
4|CRko|sg_hBTF3_08|BTF3	ATGATGATGAAGTTCCAGGT	BTF3	258	1176	1054	1481	0	0	0	0	1	0	868	0	0	1	0	6728	1267
4|CRko|sg_hBTF3_09|BTF3	ACGGACAGGCGCACCCGCTC	BTF3	493	4915	1642	958	1	1	1	4597	0	1	2962	0	1	0	1	1	1583
4|CRko|sg_hBTF3_10|BTF3	AACCCGAGGACAGGAGCCTC	BTF3	1994	1965	1323	56	872	0	0	0	0	1	1	0	0	0	0	0	1481
4|CRko|sg_hBTN2A1_01|BTN2A1	AATAACCACAATGATAGGCA	BTN2A1	2594	1532	3783	4071	0	0	0	0	4	3130	758	0	2	0	3	1	1242
4|CRko|sg_hBTN2A1_02|BTN2A1	CAGGCGCAACCCCACCGTAG	BTN2A1	2527	2890	973	2127	0	1	415	4	1	605	0	0	0	0	1	1841	1659
4|CRko|sg_hBTN2A1_03|BTN2A1	GGGCCCCACGACAATAAACT	BTN2A1	2442	3205	8208	2133	1	2	1	4672	1065	4	3524	0	5	1	1	0	1326
4|CRko|sg_hBTN2A1_04|BTN2A1	TTCTTGGAAGTAACAGCGGT	BTN2A1	4077	1593	2291	575	8154	3	0	2	0	1	431	0	2	1	4908	807	1260
4|CRko|sg_hBTN2A1_05|BTN2A1	TGGCCCCTCATTGAAATGAG	BTN2A1	1031	1697	3552	2328	3125	2	3	1156	3530	1	1934	1	2	4989	4184	2534	1362
4|CRko|sg_hBTN2A1_06|BTN2A1	ACTGCACAGGGAGACACACT	BTN2A1	1318	2601	6549	6234	2	0	0	2	0	0	0	0	0	0	0	20097	1412
4|CRko|sg_hBTN2A1_07|BTN2A1	TCCTCTGACAGGAAGAGATC	BTN2A1	1290	1984	4	687	2	1	0	1	2627	1	0	0	1	0	1	0	1077
4|CRko|sg_hBTN2A1_08|BTN2A1	TGTGAGCAAAGACATCAGCA	BTN2A1	801	2102	3947	376	1	5705	0	1	1	2	1	8213	0	0	1	1	1357
4|CRko|sg_hBTN2A1_09|BTN2A1	GTGGCCAAGATGGGATCAGT	BTN2A1	88	3275	3695	1184	5540	3	1	1	0	7	1	2	2	3004	2	24599	1399
4|CRko|sg_hBTN2A1_10|BTN2A1	ATGCTGAGGACATGGAGGTG	BTN2A1	1571	2975	1208	1916	4	2	0	3280	3	10068	2	0	0	7942	1	18637	1508
4|CRko|sg_hBTN2A2_01|BTN2A2	CGGGCACAACCTCACCGTAG	BTN2A2	506	2863	1020	1552	4686	3214	0	3	7588	3	2	0	2	1	7022	1	1488
4|CRko|sg_hBTN2A2_02|BTN2A2	TCATCAGAGACAAGTATGTG	BTN2A2	637	1013	1816	1359	9386	0	1	0	2	4	1188	0	1	0	0	1146	1313
4|CRko|sg_hBTN2A2_03|BTN2A2	TGAGGCCATCCTACGCCTCG	BTN2A2	558	1582	1847	1346	4	13046	9153	4	2942	4	1391	0	6726	1	3	2	1518
4|CRko|sg_hBTN2A2_04|BTN2A2	TGTGACGTTATGTATGACCA	BTN2A2	2724	3194	1066	2	1	0	1	2	0	0	0	0	0	1	0	0	1189
4|CRko|sg_hBTN2A2_05|BTN2A2	TCATCCTGACCGCATCTCCC	BTN2A2	2285	689	7202	4919	4992	1	2	2409	256	5	1	0	2999	0	2	6628	1340
4|CRko|sg_hBTN2A2_06|BTN2A2	TCCTCTGACAGGAAGAGCTC	BTN2A2	1512	907	1464	1030	0	0	1	0	1	0	750	0	0	2120	0	0	1054
4|CRko|sg_hBTN2A2_07|BTN2A2	TGGCCCCACGACAGTAAACT	BTN2A2	1463	2112	4148	6	1	0	0	2607	0	0	0	0	0	2507	1	1	1310
4|CRko|sg_hBTN2A2_08|BTN2A2	GGCGGGCACAACCTCACCGT	BTN2A2	6324	2176	2913	1022	1	2	0	4544	0	3	1	0	2	0	4707	0	1594
4|CRko|sg_hBTN2A2_09|BTN2A2	GTTGCATCAAGAAACTTCAA	BTN2A2	2825	1898	1459	5	3	1	0	2190	1	0	0	8181	1	2	1	6519	1218
4|CRko|sg_hBTN2A2_10|BTN2A2	GGCCATCCTACGCCTCGTGG	BTN2A2	1342	1466	1566	746	1	3532	1	1	1	1	1687	0	1	1	5805	2045	1595
4|CRko|sg_hBTRC_01|BTRC	ACGAGTTTATGTGCCCATGT	BTRC	1910	2618	1276	1390	2	1	0	0	2465	2	1660	0	2	3142	11369	0	1378
4|CRko|sg_hBTRC_02|BTRC	AGAGGCCTGGCAGAACGAAG	BTRC	1069	3705	3448	477	5526	4	1	2	1	4077	3	1	15634	7659	2	1	1389
4|CRko|sg_hBTRC_03|BTRC	AGTGCAGAACTGCTTCACAA	BTRC	1799	3656	109	7	0	0	0	0	1	0	0	0	1	1	1	2998	1426
4|CRko|sg_hBTRC_04|BTRC	TGCGATGCCTGTATAACCCA	BTRC	1838	1416	3617	1217	7609	0	2	0	1180	0	2	0	5914	0	1	3	1365
4|CRko|sg_hBTRC_05|BTRC	GTAATAATGGCGAACCCCCT	BTRC	2205	1642	1907	1516	0	1	2175	2	0	0	1	0	22904	0	3806	0	1386
4|CRko|sg_hBTRC_06|BTRC	AGTGATCATAACAGGATCAT	BTRC	1097	2774	2634	448	5368	1	2773	1	947	4	972	2	3090	0	2	1	1140
4|CRko|sg_hBTRC_07|BTRC	TGGTACCGAGTGACCTCTGA	BTRC	1636	1395	4144	3	0	0	1	0	0	3	1339	0	2	1	0	9376	1379
4|CRko|sg_hBTRC_08|BTRC	ATAGAATCTAATTGGAGATG	BTRC	1186	1696	2633	1289	1	3187	1	2496	4385	1	1	1	0	0	2	0	938
4|CRko|sg_hBTRC_09|BTRC	GTATGATTGTGCCCAAGCAA	BTRC	22	1748	709	1541	4058	2	1	0	0	0	1	0	0	0	2	7916	902
4|CRko|sg_hBTRC_10|BTRC	GAGACAACACAATCAAGGTG	BTRC	2521	3907	3460	292	0	1	1	6437	2	1	2239	1	0	0	11860	6102	1432
4|CRko|sg_hBUD13_01|BUD13	CCTCCTAGGAGATGAATCCG	BUD13	493	1426	814	2	2387	0	0	0	2	1	1977	0	0	0	0	0	1366
4|CRko|sg_hBUD13_02|BUD13	CGGTGTCTAGGTCTATTCCG	BUD13	255	1496	774	322	0	0	0	3795	0	1	0	0	0	0	0	0	1285
4|CRko|sg_hBUD13_03|BUD13	GACATTAGGAGCCAAATCAG	BUD13	1403	1744	604	2	1	2	1	2396	2286	1	778	0	0	1	5326	1	1386
4|CRko|sg_hBUD13_04|BUD13	TCATGACGAGCCCCTCTGAG	BUD13	832	3079	1	48	2	0	9418	2	1	1	2	1	0	0	0	2	1512
4|CRko|sg_hBUD13_05|BUD13	GTTGTTATGGACCCTTCTGG	BUD13	1696	646	548	581	2	0	0	1	1	4015	367	1	5879	0	1	2495	1238
4|CRko|sg_hBUD13_06|BUD13	AGGATCCGGGGTGTCATGAC	BUD13	1560	1587	1622	710	63	0	0	2604	1	0	0	0	0	6882	0	0	1275
4|CRko|sg_hBUD13_07|BUD13	CACGGAATAGACCTAGACAC	BUD13	4	494	727	5139	1	0	0	1	2791	1	1	0	0	0	2	0	1350
4|CRko|sg_hBUD13_08|BUD13	GCCCCAAAGATACATACCAC	BUD13	764	422	1117	1445	0	0	1040	1	1	335	1	0	0	1	0	3369	1413
4|CRko|sg_hBUD13_09|BUD13	GCACCTGAAGAATTATGCTG	BUD13	956	1967	3556	1	0	0	0	0	0	0	0	0	0	0	0	9044	1340
4|CRko|sg_hBUD13_10|BUD13	TTCGTGGAGGAGAGATGTCA	BUD13	1372	2414	3818	93	0	2	0	0	0	3478	0	0	0	1	0	9627	1188
4|CRko|sg_hC11orf24_01|C11orf24	AGTTGATAATAAAACGTCTG	C11orf24	2440	1122	2	2488	0	0	1	1	3	2891	677	0	0	0	0	0	1123
4|CRko|sg_hC11orf24_02|C11orf24	CGCTACAGTCTGAGCACGTG	C11orf24	2560	1706	6770	1361	4015	0	4677	4	2	5	1577	0	0	3	0	0	1520
4|CRko|sg_hC11orf24_03|C11orf24	GGAGGCCGCAGTCGTAATGG	C11orf24	1360	2603	3907	2404	5507	3	1	4657	3	3	2	11707	1	3874	9770	3557	1569
4|CRko|sg_hC11orf24_04|C11orf24	TGCAGCCTCCAGTATGACTG	C11orf24	3	3554	2532	3510	14	4405	2	1355	3240	0	659	1	1	4992	1	1	1390
4|CRko|sg_hC11orf24_05|C11orf24	AACGTCTGAGGATGTAACCA	C11orf24	2791	1077	3010	1097	0	6677	2	2	0	2	1	0	0	0	0	0	1207
4|CRko|sg_hC11orf24_06|C11orf24	GGAGGCCGCAGTCATACTGG	C11orf24	1640	2689	7959	1162	6809	4038	3	3987	2	4	915	0	0	1	2	1339	1593
4|CRko|sg_hC11orf24_07|C11orf24	GCTCTTTGGCACTTGTGCGA	C11orf24	2321	1028	3427	2907	2243	0	0	2555	0	0	1	0	0	0	1	0	1394
4|CRko|sg_hC11orf24_08|C11orf24	CAGGCTGGTCCACTGACACC	C11orf24	640	375	1085	3746	0	2	0	2603	1	0	0	0	1	1	0	0	1493
4|CRko|sg_hC11orf24_09|C11orf24	GGTGGTGGTCACCACTGTGG	C11orf24	2774	1773	197	1302	5332	1	1	2	2	2059	1	0	1	1	1	1	1586
4|CRko|sg_hC11orf24_10|C11orf24	GGTGTCACTGGGCATGTGCT	C11orf24	1100	2221	6552	2481	4985	0	2	3	5013	349	1	0	13125	50	10748	3111	1472
4|CRko|sg_hC12orf66_01|C12orf66	CACACCAAACTGCAGACGTG	KICS2	1147	3313	4116	948	0	3	0	4982	4	7709	850	2	40235	1	2	0	1511
4|CRko|sg_hC12orf66_02|C12orf66	GCAATGAAGTATAGATGGTG	KICS2	1526	1572	2546	2213	0	1	1	0	2	1	1750	0	2	6055	2	0	1235
4|CRko|sg_hC12orf66_03|C12orf66	GTGATAGACCTTCTCGGCCG	KICS2	1518	739	1746	1124	0	1	2	0	1	2	1463	0	1	0	5111	0	1481
4|CRko|sg_hC12orf66_04|C12orf66	TGTCGTAAGAGAAGATACCC	KICS2	1467	1028	2	124	0	7781	3173	2	0	1	0	0	1	2	1	3	1214
4|CRko|sg_hC12orf66_05|C12orf66	GTAAATTAACCAGAGATGGG	KICS2	1771	1731	4615	5177	0	0	0	6	1	1	1	0	0	4902	7432	1616	1191
4|CRko|sg_hC12orf66_06|C12orf66	GTTTGGAGGGCAGTCTCAGA	KICS2	1813	3237	3833	2341	0	1	1	1	0	2921	1	0	0	1	0	6807	1241
4|CRko|sg_hC12orf66_07|C12orf66	ATGAAAGTAAAAGCTAAACT	KICS2	1250	1330	3993	821	0	0	1	0	1503	0	540	0	0	0	0	0	1116
4|CRko|sg_hC12orf66_08|C12orf66	ACCTACCTGGGGCAGAAACT	KICS2	1884	2709	1932	1350	1667	11513	2	2	1	4291	2	5615	2	1	1	1	1359
4|CRko|sg_hC12orf66_09|C12orf66	ATCAATGCTGAAGAGCTCGT	KICS2	1988	1883	1679	3061	6096	15500	2	3	3	5816	3	1	3	2960	4	2	1309
4|CRko|sg_hC12orf66_10|C12orf66	AGCAGAGCTGCTCTGACAGG	KICS2	647	1545	2372	2506	1	0	1	2	0	1	1	0	0	0	0	14381	1359
4|CRko|sg_hC16orf74_01|C16orf74	CGTCCTGAACGACAAGCACC	C16orf74	3	1085	791	2200	2	1	0	6	0	10289	1	0	0	2	4401	7761	1481
4|CRko|sg_hC16orf74_02|C16orf74	GTGCTTGTCGTTCAGGACGG	C16orf74	941	1189	2866	1365	5326	1	1	0	1	7860	0	1	1	0	1	0	1443
4|CRko|sg_hC16orf74_03|C16orf74	TCAGGCCTTACCTTTCAGGC	C16orf74	2133	2021	1596	5525	17	2	0	2	504	0	1346	0	1	3200	0	0	1257
4|CRko|sg_hC16orf74_04|C16orf74	TCGGCAGCATCATGCCCGTG	C16orf74	2549	4225	2815	1249	4460	0	2	2974	1	3983	834	1	12355	1	2	1660	1470
4|CRko|sg_hC16orf74_05|C16orf74	GATGTCCTGCCTGAAAGGTA	C16orf74	2670	2039	4043	1275	3703	0	0	0	1	0	0	0	2	0	0	1452	1174
4|CRko|sg_hC16orf74_06|C16orf74	TGATGATGTCGGGCACGTCC	C16orf74	893	2473	1376	159	3797	0	0	0	3228	0	997	0	1	0	0	3084	1368
4|CRko|sg_hC16orf74_07|C16orf74	CGGCAGCATCATGCCCGTGG	C16orf74	3809	2662	2451	2451	3904	1	1	0	0	355	0	0	1	4465	0	0	1495
4|CRko|sg_hC16orf74_08|C16orf74	ATCACGCCCCCCACCCCCAC	C16orf74	3268	3833	1586	3292	4082	5	1	7127	2	3	4360	0	0	3609	0	14232	1928
4|CRko|sg_hC16orf74_09|C16orf74	CATCACGCCCCCCACCCCCA	C16orf74	1684	1858	4092	2466	3	0	0	7597	2870	1	942	0	1	0	5787	0	1927
4|CRko|sg_hC16orf74_10|C16orf74	CCTGTGCTCCCCAAGTCCCT	C16orf74	2453	1289	2490	4896	1	1	0	2	2	2	0	0	0	9990	0	7426	1477
4|CRko|sg_hC1GALT1_01|C1GALT1	CAAACACGTCAAAGCTACTT	C1GALT1	624	2661	408	4761	0	0	0	2130	2	0	1	0	0	2662	0	12615	1318
4|CRko|sg_hC1GALT1_02|C1GALT1	TCATACTAGACAATTTGAGG	C1GALT1	2296	1134	1579	0	0	0	0	1	1	0	0	0	0	0	0	5076	959
4|CRko|sg_hC1GALT1_03|C1GALT1	TTCATAATGATCCTCATGCA	C1GALT1	642	3116	1549	1010	6164	3	1	4	0	2220	0	0	0	3293	5813	3763	1103
4|CRko|sg_hC1GALT1_04|C1GALT1	TTTAAGCCTTATGTAAAGCA	C1GALT1	0	1371	19	374	3	1	0	0	1	0	764	0	2	5399	3483	1300	1086
4|CRko|sg_hC1GALT1_05|C1GALT1	AAGGCAGAGATCAACTATAC	C1GALT1	1	802	1337	6124	3	2	2	3	6139	1	818	0	0	0	4187	1	1306
4|CRko|sg_hC1GALT1_06|C1GALT1	AATGGACAGAATCATCTAGA	C1GALT1	3211	4913	1805	6709	0	4	1	4	2087	4501	1306	0	2	4747	5	1	1096
4|CRko|sg_hC1GALT1_07|C1GALT1	GTAAAGCAGGGCTACATGAG	C1GALT1	1434	2964	2922	5155	3268	11575	1187	0	1564	3	2	0	4720	0	2	7902	1424
4|CRko|sg_hC1GALT1_08|C1GALT1	ATTATGAAGAACATTAGGCT	C1GALT1	663	3696	4762	1135	0	0	0	0	0	0	1	0	2023	3855	0	3445	1142
4|CRko|sg_hC1GALT1_09|C1GALT1	ATGTAGCCCTGCTTTACATA	C1GALT1	1238	1496	2329	3	0	1	0	1	1826	1	1700	0	0	0	0	1701	1153
4|CRko|sg_hC1GALT1_10|C1GALT1	GCAGATTCTAGCCAACATAA	C1GALT1	1377	1157	3946	568	4015	1	791	1	1	1036	1	0	0	2	0	1	1256
4|CRko|sg_hC1orf112_01|C1orf112	AACTGTATCTTCAGATACAC	FIRRM	0	1751	2796	223	0	0	0	0	0	0	0	0	0	0	0	0	1148
4|CRko|sg_hC1orf112_02|C1orf112	CAAAATGATGGATTCCTGTG	FIRRM	1037	2887	4	1579	0	0	0	1	0	298	0	0	0	0	0	2008	1295
4|CRko|sg_hC1orf112_03|C1orf112	TGCACACCATGTCACCATAG	FIRRM	925	2814	5358	5164	3907	0	0	2	3858	1	809	0	0	1	0	0	1460
4|CRko|sg_hC1orf112_04|C1orf112	GAATTAACCAGTCAAGCCAG	FIRRM	1450	2370	3231	792	1	4	1	1	3282	1	0	0	2	1	1	4618	1382
4|CRko|sg_hC1orf112_05|C1orf112	ACGCACCAGATGAGCCACTA	FIRRM	1819	2300	4578	1982	1	1	1	5101	2352	1578	2	0	0	0	1	0	1497
4|CRko|sg_hC1orf112_06|C1orf112	ATGAAATGCATGGTCCATAC	FIRRM	901	332	2667	774	1	0	0	3	1	3	1	5891	0	2	0	0	1271
4|CRko|sg_hC1orf112_07|C1orf112	ATAGTGAATCTGTGTATTCT	FIRRM	2254	2482	5513	458	3	0	1	1	0	623	0	0	0	10858	0	1	1070
4|CRko|sg_hC1orf112_08|C1orf112	TGGAAATCCAGACCACTCTA	FIRRM	2161	1421	1221	2585	3986	0	0	1	1	0	882	8693	0	0	6212	2	1344
4|CRko|sg_hC1orf112_09|C1orf112	ACCAGTTCAGCAAACAGTGA	FIRRM	2	739	5866	4133	1	1	1	4567	0	2	0	0	0	4767	3	6086	1346
4|CRko|sg_hC1orf112_10|C1orf112	TAAGCTCAGGAGGTAACGCC	FIRRM	1065	899	5211	3896	4457	0	0	3	3996	4444	2	1	1893	1	1	0	1412
4|CRko|sg_hC1orf216_01|C1orf216	GAGTGGAACCTATCCTGAGG	C1orf216	1907	1801	941	4588	3292	3	0	1	1	3030	2	0	0	1	2	2503	1536
4|CRko|sg_hC1orf216_02|C1orf216	GCTACGGCTGTCAATGCTCA	C1orf216	3308	3529	2994	464	0	1	0	1	0	2	1577	0	0	0	0	0	1319
4|CRko|sg_hC1orf216_03|C1orf216	GCTGCGCACCCCTTCCTCAG	C1orf216	2474	1817	3762	1056	1	0	3241	3603	0	0	0	0	0	0	0	1	1517
4|CRko|sg_hC1orf216_04|C1orf216	TCGGGCTGACATAATCCAGG	C1orf216	3147	2895	1387	1652	3055	0	0	2104	1	0	1	6396	2	3340	1	1	1422
4|CRko|sg_hC1orf216_05|C1orf216	GCAGAGTGGAACCTATCCTG	C1orf216	1153	1948	5654	1465	0	2609	1	2	1779	1	0	0	0	8794	4015	3	1543
4|CRko|sg_hC1orf216_06|C1orf216	AGCTCGGGCTGACATAATCC	C1orf216	1258	1804	3755	402	2	11377	2	4	2	2	934	0	0	0	2	2875	1385
4|CRko|sg_hC1orf216_07|C1orf216	AGGGCAGAAGGGGATCGGGA	C1orf216	950	3924	3549	5942	1	2	0	0	1	1739	1	0	0	1	1	1	1410
4|CRko|sg_hC1orf216_08|C1orf216	TGGCACAGTCTGCTCCCCTC	C1orf216	538	1994	2610	1405	1	1	1	6389	0	1640	2580	0	1	4768	7426	3	1514
4|CRko|sg_hC1orf216_09|C1orf216	GGTGCGCAGCCCCCCAGAGG	C1orf216	2344	3589	2571	444	5458	0	0	5900	1	3	1248	1	1	0	3896	0	1532
4|CRko|sg_hC1orf216_10|C1orf216	TGGAAGGCTTGGTTGTCAGA	C1orf216	3982	2704	5713	345	0	1	2	1	0	1	0	0	1	1	1	1	1332
4|CRko|sg_hC2orf69_01|C2orf69	ATAACTATTGGGGAACCGGT	C2orf69	570	1115	2	118	0	0	0	2	0	0	0	0	0	5212	0	0	1172
4|CRko|sg_hC2orf69_02|C2orf69	CATACTACGAATGGTTGCCA	C2orf69	1115	1698	129	935	2	3	0	3	2324	1	1292	0	1	3110	0	0	1431
4|CRko|sg_hC2orf69_03|C2orf69	GAGTTACCTGCACATCCCCA	C2orf69	628	1489	2441	1021	3	12457	2	0	3	7117	1422	1	2	3	7066	1	1537
4|CRko|sg_hC2orf69_04|C2orf69	GCCAGAACCATGAACCCGGG	C2orf69	4417	2781	3320	5579	2815	0	0	0	1	0	1517	0	0	1	1	0	1568
4|CRko|sg_hC2orf69_05|C2orf69	TCACCCAAATATAACTATTG	C2orf69	2883	1714	4281	6398	3	2	1	1273	1	3	2	0	0	2	6264	4	1082
4|CRko|sg_hC2orf69_06|C2orf69	CAGGCCAGAACCATGAACCC	C2orf69	2206	3057	3891	1909	2	1	3	0	0	3	834	0	0	0	0	0	1464
4|CRko|sg_hC2orf69_07|C2orf69	TCATCCTGAGAATTATCAAT	C2orf69	3125	1630	4445	446	3	1	0	2399	2	2	0	0	1	1728	1	7058	1046
4|CRko|sg_hC2orf69_08|C2orf69	GAAATAGAGGACGTGATGCT	C2orf69	1870	2455	4172	585	2	2	1	3	2	3	650	11492	1	0	1	0	1296
4|CRko|sg_hC2orf69_09|C2orf69	AAAGTCAGTATTGTGTTCTG	C2orf69	440	1499	940	296	5385	0	0	1	2	0	1	0	1	3895	3035	4242	1190
4|CRko|sg_hC2orf69_10|C2orf69	CAGGCACGGTGGAAAGCTGC	C2orf69	1505	1222	5828	924	0	1	0	0	3	2	1104	0	0	6225	0	2108	1409
4|CRko|sg_hC3orf33_01|C3orf33	AATATGATTCTAAAATCTAC	C3orf33	1563	565	382	1350	4750	2	0	0	1	2	1	0	0	1083	0	1	905
4|CRko|sg_hC3orf33_02|C3orf33	AGAAGAAATGTTAAACTACG	C3orf33	413	1891	1330	2	1	0	0	1	0	5864	0	0	0	1	0	0	1158
4|CRko|sg_hC3orf33_03|C3orf33	TGGAACCATAGTAATTGGGA	C3orf33	66	2706	3017	3	1	1	1	1	1	2	2153	13705	0	5027	0	2765	1133
4|CRko|sg_hC3orf33_04|C3orf33	TTAACCAGCAAAGCACCACG	C3orf33	1067	2282	2849	810	1198	6160	0	0	0	0	1313	0	0	1	4735	0	1262
4|CRko|sg_hC3orf33_05|C3orf33	CCAGTACCCGGACTAGGCGC	C3orf33	2662	2447	3603	1224	4	1	0	3	5	1	2	0	42594	0	2	2	1489
4|CRko|sg_hC3orf33_06|C3orf33	CGTGGCTCGGATCTCGCAGT	C3orf33	727	718	2620	3360	0	1	2	2	2052	0	1	9040	0	11	4124	0	1440
4|CRko|sg_hC3orf33_07|C3orf33	CGACCACCTGCGCCTAGTCC	C3orf33	1488	1513	4132	1799	12681	1	2	3	3	2	4654	1	3	1	16410	2	1707
4|CRko|sg_hC3orf33_08|C3orf33	AAGTAACATTATTCCAGCTA	C3orf33	1181	2103	2090	735	0	10186	0	1	0	0	2	0	1	1	1	1	1009
4|CRko|sg_hC3orf33_09|C3orf33	GTGGCCCCAGTACCCGGACT	C3orf33	3424	2260	5026	21	1	1	0	3922	2540	1	818	1	0	0	1	0	1579
4|CRko|sg_hC3orf33_10|C3orf33	ACGACCACCTGCGCCTAGTC	C3orf33	3153	2633	3178	2456	3	2	4390	1	4	3432	0	1	0	0	7804	0	1749
4|CRko|sg_hC6orf99_01|C6orf99	AGAACGAGGAACACTGCCCG	LINC02901	2732	646	3070	866	2	2	2	1	1953	1	1234	11023	1	0	4	4678	1711
4|CRko|sg_hC6orf99_02|C6orf99	AGCACTACCTGCAGAGTAGT	LINC02901	2154	569	3806	1213	1	1	2	2092	3465	1	0	1	1	0	5144	2	1358
4|CRko|sg_hC6orf99_03|C6orf99	AGTGCTGAAATCCTGGATGT	LINC02901	2584	2022	3467	2219	3	3	3693	0	3419	650	2	0	1	1	3367	1	1473
4|CRko|sg_hC6orf99_04|C6orf99	TGTCCATCTGCTCTTCCGAG	LINC02901	345	2170	4877	2215	2	1	2	6390	4	2	2	1	20439	0	3	2278	1426
4|CRko|sg_hC6orf99_05|C6orf99	AAGCAGATGCGCGTTCCTGT	LINC02901	1662	4048	6077	2024	2	1	10400	9	1746	4	3	1	2	3969	4	2	1404
4|CRko|sg_hC6orf99_06|C6orf99	AAGAACGAGGAACACTGCCC	LINC02901	1056	264	3470	1779	3526	3	1	1	0	3	1	10472	0	0	1	0	1509
4|CRko|sg_hC6orf99_07|C6orf99	GATAAGAAACCACTCGAAGC	LINC02901	925	1852	743	1	0	1	0	0	166	1	0	0	0	0	5623	0	1455
4|CRko|sg_hC6orf99_08|C6orf99	CAAGTGGAAAGAAAATTCCG	LINC02901	1482	1782	1080	2680	6	4325	4	3077	8	2312	1080	2	7	7	13	1	1308
4|CRko|sg_hC6orf99_09|C6orf99	CAGAAGGGTGTCCATGCCTA	LINC02901	1828	827	2078	2	0	0	0	0	0	0	0	0	0	1	6260	0	1328
4|CRko|sg_hC6orf99_10|C6orf99	CAGTCCGCAGCGTCGTCCGA	LINC02901	2203	2030	1023	1569	0	1	1	5227	3987	0	1306	1	0	1	1	2517	1584
4|CRko|sg_hCABIN1_01|CABIN1	CTGGAGAACCTAACCAACGG	CABIN1	1154	609	2784	5138	5904	1	0	2	0	1	1	0	0	1	1	0	1420
4|CRko|sg_hCABIN1_02|CABIN1	GTAATCGTGGTCAATCGGAG	CABIN1	1316	201	4325	1438	1	2	0	0	4188	1169	0	0	0	2682	1	3	1250
4|CRko|sg_hCABIN1_03|CABIN1	GTAGTGCAGCAAGTAAACGG	CABIN1	472	995	4804	1213	0	0	1	4857	1	2	3	0	0	1	9727	1	1318
4|CRko|sg_hCABIN1_04|CABIN1	TGAAATGATAATCAGCCAGG	CABIN1	1850	1808	3665	52	2	1	1	1	3998	1	750	2	3689	1	0	1546	1197
4|CRko|sg_hCABIN1_05|CABIN1	AGTTGAAGTTCCCTCAATGT	CABIN1	489	911	596	1004	0	0	0	0	0	0	0	0	0	1437	0	0	1249
4|CRko|sg_hCABIN1_06|CABIN1	ATCCGGTGTAGAATGATCCA	CABIN1	2572	1557	165	607	2	3	10208	1	5	2	931	3	3	0	15078	0	1090
4|CRko|sg_hCABIN1_07|CABIN1	ACTCCACAGATGTCAACCTC	CABIN1	732	1638	1079	2253	0	0	0	0	0	0	0	0	0	0	0	0	1374
4|CRko|sg_hCABIN1_08|CABIN1	GTATGAAGCAGGCGACTACA	CABIN1	1000	3019	2579	1	1	0	0	0	0	0	1	0	0	0	0	13747	1384
4|CRko|sg_hCABIN1_09|CABIN1	AGAACAGGGACTGTACCGTC	CABIN1	1731	1469	3402	1675	0	0	2	0	0	1	1	0	0	1	0	0	1385
4|CRko|sg_hCABIN1_10|CABIN1	GGTATGGTGAATGGCAGATT	CABIN1	1847	2365	157	5247	0	1	0	0	0	2	562	0	0	5315	0	0	1350
4|CRko|sg_hCACUL1_01|CACUL1	ATCACCCCATTAGCCTCCGG	CACUL1	29	3601	409	4131	5901	0	1	0	2	2	0	1	1	0	1	0	1601
4|CRko|sg_hCACUL1_02|CACUL1	CCAGAACCACAACAACTGGG	CACUL1	1308	466	1546	1028	2	5665	0	1642	1	7323	795	0	2956	1	2	5791	1459
4|CRko|sg_hCACUL1_03|CACUL1	GATATGGGGATATAGTCACC	CACUL1	900	934	901	1	2	0	1	0	1935	0	0	0	0	0	0	985	1233
4|CRko|sg_hCACUL1_04|CACUL1	TTTCAATATAGAGATCTGGA	CACUL1	487	3666	483	841	2	6073	1	1	1	0	1	0	0	0	0	1	933
4|CRko|sg_hCACUL1_05|CACUL1	TATCCTATGAACAGATATAC	CACUL1	243	420	938	1	0	0	0	0	2	0	1	0	0	0	0	1	1057
4|CRko|sg_hCACUL1_06|CACUL1	AAGATTATAAGAGCACATAC	CACUL1	1359	1459	381	759	0	2	1	1	3627	0	0	0	0	1	0	0	1240
4|CRko|sg_hCACUL1_07|CACUL1	ATGATCACCCCATTAGCCTC	CACUL1	489	2260	770	2279	6585	0	1	1676	0	0	0	0	1593	0	1	0	1396
4|CRko|sg_hCACUL1_08|CACUL1	TATATCTGTTCATAGGATAT	CACUL1	1	1494	2049	3	0	0	0	0	0	0	0	0	0	11	0	4482	1035
4|CRko|sg_hCACUL1_09|CACUL1	CTGAGTTAAAAGTTGATCTA	CACUL1	725	1182	3	1928	0	1	0	0	1	0	0	1	0	1	6438	2811	1103
4|CRko|sg_hCACUL1_10|CACUL1	GATGTTGAAGAGCTGCGACG	CACUL1	1377	820	1782	1075	2	2	2	2	0	4	2471	19258	1	0	6948	3798	1424
4|CRko|sg_hCALM2_01|CALM2	GACGTACCTTATCAAACACA	CALM2	1777	873	5644	1382	0	2	1	3	0	0	0	18312	0	2828	1	0	1283
4|CRko|sg_hCALM2_02|CALM2	CAATCTGCTCTTCAGTCAGT	CALM2	2980	1380	3532	1637	1	4	2	0	2144	1	1	0	1	4787	0	0	1378
4|CRko|sg_hCALM2_03|CALM2	CTGACTGAAGAGCAGATTGC	CALM2	1006	2148	2656	3621	2	6913	0	2384	1811	6	700	1	0	0	2	1632	1390
4|CRko|sg_hCALM2_04|CALM2	AAGAAGTTGATGAAATGATC	CALM2	655	2081	1	4717	0	0	0	0	0	0	23	0	0	0	0	1	1116
4|CRko|sg_hCALM2_05|CALM2	TGATGGAACTATAACAACAA	CALM2	1824	1083	1811	7215	1	1	1	2580	0	1	0	0	0	1	2	0	1227
4|CRko|sg_hCALM2_06|CALM2	GAACTGTAATGAGATCTCTT	CALM2	536	1656	2357	231	0	0	5040	3	0	1	4	1	0	0	4744	6185	1224
4|CRko|sg_hCALM2_07|CALM2	GATGGTCAAGTAAACTATGA	CALM2	2571	3066	1630	2113	1	3	4	3	3	6	1292	0	1	4989	4	2	1078
4|CRko|sg_hCALM2_08|CALM2	GAAGCAGATATTGATGGTGA	CALM2	2949	1306	3810	3412	0	3	2	6889	0	1	1	1	1	1	1	0	1275
4|CRko|sg_hCALM2_09|CALM2	GGAACTGTAATGAGATCTCT	CALM2	1774	1561	2518	4212	0	4	1	3693	1	3	1856	0	2	1	1	0	1223
4|CRko|sg_hCALM2_10|CALM2	AGCATTCCGTGTGTTTGATA	CALM2	575	1600	2508	4459	9	6322	0	2	380	0	2	0	15928	4992	2	1	1191
4|CRko|sg_hCALM3_01|CALM3	AGATGGCACTATCACCACCA	CALM3	255	2444	3035	3428	2297	0	0	411	0	2	324	0	1	1	1	6655	1431
4|CRko|sg_hCALM3_02|CALM3	CCTGCAGCTCTGCTTCAGTG	CALM3	1614	2129	1005	5692	3027	1	0	2116	0	3	1	0	3954	0	4594	2960	1429
4|CRko|sg_hCALM3_03|CALM3	TCTTCCCCCAGAGTTCAAGG	CALM3	1980	3005	1691	11322	0	1	1	4014	1	7325	2533	0	0	1	0	1	1238
4|CRko|sg_hCALM3_04|CALM3	TGCTTACCTTGTCAAAGACA	CALM3	334	2132	5728	607	0	1	8252	1	1	3	0	1	0	0	0	5435	1085
4|CRko|sg_hCALM3_05|CALM3	ATGTAGCCATTCCCATCCTG	CALM3	525	1570	2219	1	0	0	1	1	1	727	869	0	0	0	8761	1	1349
4|CRko|sg_hCALM3_06|CALM3	CAGTGAGGAGGAGATCCGAG	CALM3	1949	3022	1835	4480	5	1	1	3	3	4	2	1	6044	4569	4	42574	1397
4|CRko|sg_hCALM3_07|CALM3	GCAGGATATGATCAATGAGG	CALM3	1561	3871	1193	3	2784	0	1	0	1	1	815	0	0	9191	0	1396	1274
4|CRko|sg_hCALM3_08|CALM3	TTATCCCCAACCCCCAGGAT	CALM3	1422	1833	2251	2288	5799	3	0	1	1	0	861	0	6323	2554	0	1	1541
4|CRko|sg_hCALM3_09|CALM3	GCTGCAGGATATGATCAATG	CALM3	1525	1997	1503	5591	6734	1	0	0	0	0	850	0	0	0	0	0	1327
4|CRko|sg_hCALM3_10|CALM3	CATTACGTGACGCAGCTCTG	CALM3	2308	4360	3057	238	0	0	855	1	0	0	623	0	0	0	1	0	1486
4|CRko|sg_hCAMK1_01|CAMK1	CATCCAGGGCTACAATGTTG	CAMK1	2573	2056	1668	2925	2661	1	0	2510	0	0	1	1	6508	7993	3	2	1445
4|CRko|sg_hCAMK1_02|CAMK1	GATCCCGGTGTACAATGCCC	CAMK1	438	2415	7964	543	1	0	0	5277	2	1	0	1	2	1	0	5485	1213
4|CRko|sg_hCAMK1_03|CAMK1	TGTGGAAAAAGGCTTCTACA	CAMK1	705	1410	2282	2037	1	1	0	0	1	0	2	10655	0	0	1	4902	1251
4|CRko|sg_hCAMK1_04|CAMK1	TGTGGAACTCCGGGATACGT	CAMK1	301	4	3707	1971	5	1	1	200	1980	6776	628	1	0	6952	3	5172	1313
4|CRko|sg_hCAMK1_05|CAMK1	GATGACATCTATGAGAGTGG	CAMK1	2018	3576	2676	1528	2	1	1	3	36	7752	3	0	0	4285	1	2	1382
4|CRko|sg_hCAMK1_06|CAMK1	GTGAAATACCTGCATGACCT	CAMK1	1829	2089	3775	1040	0	0	0	0	0	5503	1	0	1	0	0	0	1363
4|CRko|sg_hCAMK1_07|CAMK1	GATGTAGGCGATGACACCTA	CAMK1	1329	997	2851	1466	2804	1	3	3691	3	2	512	0	1	1	0	7322	1349
4|CRko|sg_hCAMK1_08|CAMK1	CTCACGTGCCCAGAACATCT	CAMK1	1602	2283	822	5	2	1	4654	4	0	1100	433	1	1	1	1	6917	1285
4|CRko|sg_hCAMK1_09|CAMK1	AGGAGAGTCAAACTCGTACT	CAMK1	1790	3169	2371	1645	0	0	1	0	4857	2	791	0	10816	1	2	8104	1373
4|CRko|sg_hCAMK1_10|CAMK1	GGAGGGCAAGGAAGGCAGCA	CAMK1	1531	2557	2635	1602	2517	0	1	1	1	1	1	1	1	4	11153	8427	1416
4|CRko|sg_hCAMSAP2_01|CAMSAP2	CATGATCGATACCCTCATGA	CAMSAP2	2320	2789	401	197	1	1	0	1	2	0	3	0	1	1926	1	0	1280
4|CRko|sg_hCAMSAP2_02|CAMSAP2	CCTTGTGGACGAACAACACG	CAMSAP2	1458	1931	2216	1971	2	3457	1	1	0	6674	0	1	0	2	0	1	1464
4|CRko|sg_hCAMSAP2_03|CAMSAP2	GTCTGAGGAGAATGGTGCAA	CAMSAP2	1286	2274	1658	5206	0	234	0	0	1	2	0	0	0	0	0	0	1393
4|CRko|sg_hCAMSAP2_04|CAMSAP2	TGTGCCCAAGCAACCACATG	CAMSAP2	1595	737	699	3145	3267	5965	0	5397	0	1	1856	0	1	0	10015	1924	1510
4|CRko|sg_hCAMSAP2_05|CAMSAP2	TGTTCATGGCGGAACTGTTC	CAMSAP2	1264	971	2773	9	2	1	0	0	0	1410	0	0	0	0	0	0	1301
4|CRko|sg_hCAMSAP2_06|CAMSAP2	TAATAGAACGAGTGATTCCT	CAMSAP2	889	3186	2393	5	138	0	0	1	1833	0	659	0	0	0	0	0	1153
4|CRko|sg_hCAMSAP2_07|CAMSAP2	GAGATGGGTGAGTAGGACGA	CAMSAP2	1623	602	3734	25	0	0	4	0	0	0	1179	1	14	7812	0	10032	1322
4|CRko|sg_hCAMSAP2_08|CAMSAP2	ACGGGACACTACCCAGCTGT	CAMSAP2	1371	2098	1340	1180	0	0	0	1259	0	0	0	0	0	8117	5495	1	1582
4|CRko|sg_hCAMSAP2_09|CAMSAP2	TATTCGAACTGGCAACACCA	CAMSAP2	1587	1934	3398	2580	0	1	2986	1	0	0	0	0	0	0	3090	1	1302
4|CRko|sg_hCAMSAP2_10|CAMSAP2	GCAACTGCCTTGCATTCCAT	CAMSAP2	4197	3132	4786	2305	2	1	12466	3	3	8	1850	0	2	6274	2	2	1389
4|CRko|sg_hCAPN10_01|CAPN10	AGCGGCGGGTCAATCTGCCT	CAPN10	1803	5058	3015	1692	1	0	3	4	0	1121	1	16778	0	0	0	1333	1614
4|CRko|sg_hCAPN10_02|CAPN10	CGTTGGCTACCCGGTCACGG	CAPN10	2358	2020	1731	1188	0	6684	2	1	0	0	2	0	0	0	2	0	1430
4|CRko|sg_hCAPN10_03|CAPN10	GAGATCCAGGCTGCACGCGG	CAPN10	2231	4193	1569	1717	0	1	2779	2	0	4264	1	0	12827	3962	1	0	1553
4|CRko|sg_hCAPN10_04|CAPN10	TCCGCGAGGACATCACGTGG	CAPN10	1258	2113	5473	4	0	0	1	1	0	0	2109	0	0	1236	0	0	1528
4|CRko|sg_hCAPN10_05|CAPN10	GCTGGGCCGACCAGGAGTAC	CAPN10	719	1776	5335	2591	4269	2	0	2	0	1	1	1	0	0	0	0	1403
4|CRko|sg_hCAPN10_06|CAPN10	AGGAGATTTGTGCCACACCC	CAPN10	3250	3059	2527	1561	1	1	1	5013	1	4	807	0	2	2	8680	1604	1458
4|CRko|sg_hCAPN10_07|CAPN10	TGGGTCCTACGAGCACCTGT	CAPN10	1234	1778	5383	435	2	0	1	5853	2643	2	0	0	2	0	2	0	1472
4|CRko|sg_hCAPN10_08|CAPN10	GCTGGGAGCACAGGACTTGT	CAPN10	1590	3014	2389	2267	2	2	0	1	3461	4	2	11855	1	3675	7651	1	1518
4|CRko|sg_hCAPN10_09|CAPN10	TGGAGCCCAGCGAGCATCCC	CAPN10	273	3367	1203	697	9	1	0	0	1	0	0	0	0	0	0	0	1524
4|CRko|sg_hCAPN10_10|CAPN10	TGCACTGGCCCGCCTGACCC	CAPN10	2869	1077	2436	291	2	3	5860	2571	2087	2	921	0	15526	0	1	1	1757
4|CRko|sg_hCASC3_01|CASC3	AACAAGTCTCATCGCCACCA	CASC3	1263	739	2699	4	0	0	0	0	0	2	1166	0	0	1	0	0	1414
4|CRko|sg_hCASC3_02|CASC3	ACAGCGCGGAGGCCGAACCG	CASC3	2602	830	4992	5457	0	1	2	1199	5	1	1549	0	2155	3707	12547	3735	1654
4|CRko|sg_hCASC3_03|CASC3	GCCTAGAGCAGACTTCTGTG	CASC3	2170	1954	3937	2	0	1	0	0	2	1	1585	1	10871	0	1611	1	1410
4|CRko|sg_hCASC3_04|CASC3	GCGTCAGCGAAAGCTATGGA	CASC3	548	0	1320	12	0	0	2	1	0	1	0	0	12658	0	0	0	1416
4|CRko|sg_hCASC3_05|CASC3	AGGGGCGTCAGCGAAAGCTA	CASC3	856	4147	1516	167	7	3	5	8	2681	34168	3	2	1	2022	11	3	1449
4|CRko|sg_hCASC3_06|CASC3	CAACTCCACCTACTAAGACT	CASC3	1559	1557	1	366	0	1	0	1553	870	0	0	0	1	0	1	0	1297
4|CRko|sg_hCASC3_07|CASC3	GCAGATGAAGGGCCCCGGTT	CASC3	2219	3004	818	1464	0	1	66	0	0	0	3251	0	0	1	7903	0	1329
4|CRko|sg_hCASC3_08|CASC3	TGAGAAGAAATCCTATTCCC	CASC3	52	150	2532	538	2679	1	2	2	1874	1	1511	0	0	1	6302	1	1217
4|CRko|sg_hCASC3_09|CASC3	AGAAGGTGAATACAGTGAAG	CASC3	89	2971	1217	577	0	1	0	36	15	0	0	0	0	0	0	0	1314
4|CRko|sg_hCASC3_10|CASC3	AGAGCCTGTGGAGAACAAAG	CASC3	1896	3366	2110	1904	0	0	1	2	1	1	868	0	0	2713	1	1	1277
4|CRko|sg_hCASP6_01|CASP6	CTTGTCTTGTAGGCATGTCG	CASP6	1756	1379	2411	8184	0	0	1	0	1	1	1575	0	1	0	1	3714	1278
4|CRko|sg_hCASP6_02|CASP6	GTAGATAAAACTACTACCTG	CASP6	400	1483	880	1043	0	1	0	1	1	1	750	0	0	2234	2	0	1263
4|CRko|sg_hCASP6_03|CASP6	GTTGGACACCAACATAACTG	CASP6	3109	6	4542	820	2	12973	0	3	2	1	3470	2	5712	3620	7083	8345	1244
4|CRko|sg_hCASP6_04|CASP6	TGCTCAAAATTCATGAGGGT	CASP6	4333	2692	4	1468	3	2	1	2778	4735	2238	1361	0	1	0	1	1	1144
4|CRko|sg_hCASP6_05|CASP6	TAACAGAGAAATGTTTGATC	CASP6	1	1264	2328	1907	2	1	2	2353	0	2	0	1	1	2	0	17466	1181
4|CRko|sg_hCASP6_06|CASP6	AAGATTGTCTCTATCTGCGC	CASP6	1784	2088	997	2	1	1	1678	4	1	3	1288	0	1	0	7027	1	1098
4|CRko|sg_hCASP6_07|CASP6	ACTACATCCAAAGGAATGAC	CASP6	682	3745	962	465	3	0	0	0	0	0	741	0	0	0	7760	0	1276
4|CRko|sg_hCASP6_08|CASP6	GAAGACACACACAAAGCAAT	CASP6	2080	3867	4381	3465	2	1	1251	1	0	0	1	0	0	3880	0	774	1399
4|CRko|sg_hCASP6_09|CASP6	ACATTAACTGGCTTGTTCAA	CASP6	481	1213	1702	1364	11998	2	0	1	1	0	1520	0	0	0	1	2	1243
4|CRko|sg_hCASP6_10|CASP6	ATAGAGACAATCTTACCCGC	CASP6	939	649	400	964	1	0	1	0	1	0	797	0	0	5311	1	2860	1314
4|CRko|sg_hCASP8_01|CASP8	AGGGGACTCGGAGACTGCGA	CASP8	858	406	5	1316	234	0	3	2316	3228	0	1594	0	1	1747	1	0	1464
4|CRko|sg_hCASP8_02|CASP8	CTACCTAAACACTAGAAAGG	CASP8	2244	1963	4309	6608	0	2	0	917	1683	1	0	0	0	1849	2	4514	1173
4|CRko|sg_hCASP8_03|CASP8	GCCTGGACTACATTCCGCAA	CASP8	3512	3319	1628	811	1605	0	1	1	1	1936	3	1	1	0	0	2824	1473
4|CRko|sg_hCASP8_04|CASP8	TCTACTGTGCAGTCATCGTG	CASP8	1243	5226	3559	687	2	1	12008	4	6271	734	182	2	1	0	3993	2741	1390
4|CRko|sg_hCASP8_05|CASP8	ATGATCAGACAGTATCCCCG	CASP8	1112	2283	2863	1398	654	0	1	2242	0	0	1	0	1	0	0	1	1362
4|CRko|sg_hCASP8_06|CASP8	TGTTACTGTGGTCCATGAGT	CASP8	545	1576	658	187	0	1	0	0	0	1	1	1	0	1	11603	4356	1289
4|CRko|sg_hCASP8_07|CASP8	AATGGAACACACTTGGATGC	CASP8	1144	801	2959	848	2	0	0	4	2	3379	1	2	1	0	0	10403	1450
4|CRko|sg_hCASP8_08|CASP8	CATCCTGGGAGAAGGAAAGT	CASP8	0	313	2024	66	4177	1	1	4	0	1	2	0	17592	1	4115	0	1271
4|CRko|sg_hCASP8_09|CASP8	TTGCAGGGGAGGAGTTGTGT	CASP8	3534	3570	5166	3	2	2	0	0	2	1505	0	0	0	0	1	0	1236
4|CRko|sg_hCASP8_10|CASP8	AGAACAGGATAGTGAATCAC	CASP8	1469	1275	20	584	0	1	0	0	0	0	0	0	0	0	0	1	1343
4|CRko|sg_hCBL_01|CBL	GCAGGTCTAAGATATAAGGT	CBL	1577	2314	1157	239	0	0	0	0	0	0	0	0	0	0	0	1416	1165
4|CRko|sg_hCBL_02|CBL	GGTGGAAGATCTCGAAGTGT	CBL	1934	1555	1717	596	3133	2	7079	5	3	1628	351	0	0	3	2	10407	1297
4|CRko|sg_hCBL_03|CBL	GTAGATCCGTTTGATCCTAG	CBL	1512	2532	2382	1336	4	2	0	2744	2	16289	2	2	2	1	1	1652	1284
4|CRko|sg_hCBL_04|CBL	GACGGTGGACAAGAAGATGG	CBL	2490	1037	1158	975	0	0	0	0	0	0	0	0	0	0	0	0	1380
4|CRko|sg_hCBL_05|CBL	AGATGAGGGACAGTTTGGTT	CBL	3773	2041	377	5383	8843	2	1	4	2	3	705	0	0	1	6691	3819	1386
4|CRko|sg_hCBL_06|CBL	GCCTGTCGAAAGCTCTTCCA	CBL	694	2462	2799	5679	0	0	0	2489	0	0	793	2	0	1	4634	0	1425
4|CRko|sg_hCBL_07|CBL	TTGGGTATGTTACTGCTGAT	CBL	3149	1404	3207	3035	2	2	0	1043	0	0	832	1	2	3283	3	1	1175
4|CRko|sg_hCBL_08|CBL	ATCAAACGGATCTACCACGA	CBL	2248	1227	1849	1205	3	0	3	1	3468	8937	981	0	1	2581	0	0	1373
4|CRko|sg_hCBL_09|CBL	AGAAGGCGGCCGTTCCACCT	CBL	0	955	2746	0	0	0	0	1900	0	1	2	0	0	0	5572	0	1486
4|CRko|sg_hCBL_10|CBL	GCAGCCATGAGTCTCCAAGG	CBL	387	2074	2736	951	0	1	1	0	3919	2	1759	0	1	1	20628	0	1560
4|CRko|sg_hCBLC_01|CBLC	CTTGGACCTCATCATAGGTG	CBLC	2	3978	1099	1239	1	1	1	0	0	1	1659	0	1	0	0	0	1258
4|CRko|sg_hCBLC_02|CBLC	GAGAGGTGGCCCATTCTCGG	CBLC	1005	3082	7127	3745	3469	6723	1	4	3330	3	1	1	1604	1	1	6556	1475
4|CRko|sg_hCBLC_03|CBLC	GGCCCAGCTGTACTCGCCTG	CBLC	2077	3015	1940	559	2	0	3969	32	1	1	356	1	0	1	2	0	1663
4|CRko|sg_hCBLC_04|CBLC	GTCCACAGTACTTTCCCCCG	CBLC	231	2615	1447	0	1	0	0	0	0	0	0	0	0	0	1	0	1524
4|CRko|sg_hCBLC_05|CBLC	AGTCAACCACCCAGGCTACA	CBLC	244	4328	3746	1207	1	1	0	2532	0	1	1002	0	0	0	1	0	1467
4|CRko|sg_hCBLC_06|CBLC	AGCTGCACGCACTCTTCCCC	CBLC	2079	1216	6915	2470	11057	1	2157	3	2	2	1530	0	4559	2	0	3318	1635
4|CRko|sg_hCBLC_07|CBLC	GAAGACGTCGAACTCGAAGA	CBLC	1234	2625	526	187	4544	5183	1	1	0	1	1	0	0	8027	1	2	1313
4|CRko|sg_hCBLC_08|CBLC	AAGAGCAATGCGTCGACCCC	CBLC	878	1	2174	1	0	0	0	1	1	0	3195	0	0	0	0	0	1462
4|CRko|sg_hCBLC_09|CBLC	ATCGGCTATGTGAGCTCAGA	CBLC	1079	2891	6886	2	2	0	0	2843	0	0	683	0	4	0	1	0	1319
4|CRko|sg_hCBLC_10|CBLC	AGGGACTCAAACTCAGCCCA	CBLC	3540	2028	2819	2235	0	1	3022	2	0	3	0	0	0	2584	0	989	1387
4|CRko|sg_hCBLL1_01|CBLL1	CGAATTGAGCAGTGTACACG	CBLL1	1094	1574	1526	657	0	0	1	1	3	3	1	0	8754	5093	8441	707	1437
4|CRko|sg_hCBLL1_02|CBLL1	GGCTGATTATAGTGCTCATG	CBLL1	987	3704	1376	870	3	1	0	1	1	4	661	2	0	5975	4425	5736	1296
4|CRko|sg_hCBLL1_03|CBLL1	GTGGCATTATAAAACGCTCA	CBLL1	1100	504	699	609	0	1	0	0	4154	2	0	0	2	1354	0	1	1350
4|CRko|sg_hCBLL1_04|CBLL1	GTTTCCTGACTGACCGATCG	CBLL1	2670	668	2462	3521	7711	2	4	4046	1	2	632	5700	4640	5320	0	1	1386
4|CRko|sg_hCBLL1_05|CBLL1	GAACTCAAAGAACTATAAAC	CBLL1	56	1766	1413	2036	1	0	0	1	1840	1	0	0	5083	0	0	1622	1182
4|CRko|sg_hCBLL1_06|CBLL1	GGAGCACGAATATCCTCATG	CBLL1	1169	901	1135	1800	4	1	5328	0	2	2928	2857	1	1	3357	14425	3351	1419
4|CRko|sg_hCBLL1_07|CBLL1	GGTGGCATTATAAAACGCTC	CBLL1	1362	2432	461	1104	3872	2	6641	4	2	0	1602	0	1	1	1	1	1289
4|CRko|sg_hCBLL1_08|CBLL1	GAACGGTATGACTGTAAAGG	CBLL1	1284	1274	636	0	1	0	0	1	0	0	0	0	0	0	0	0	1193
4|CRko|sg_hCBLL1_09|CBLL1	AAGGGAGATAAGATGTGTCC	CBLL1	926	700	407	1	3	0	0	1	2	2	0	0	0	0	5409	3630	1293
4|CRko|sg_hCBLL1_10|CBLL1	TGAGTCATCCTGAATAGGGA	CBLL1	1829	1001	3041	7	3190	1	0	3	2393	357	2	0	2	0	8373	20571	1146
4|CRko|sg_hCBR4_01|CBR4	ACTATGATTCAACAACAGGG	CBR4	959	505	3184	2825	1	0	3	0	0	2	1560	1	1	2213	4006	2404	1267
4|CRko|sg_hCBR4_02|CBR4	CAGTTTGGTACCTACCGCCG	CBR4	17	1731	2964	1080	2688	3	3	3	0	9704	3	1	18688	10996	2	2	1558
4|CRko|sg_hCBR4_03|CBR4	GGCCCGGAAAGGCTACCGAC	CBR4	3934	655	1481	1	3	6438	0	1	4298	2	959	0	2	1	0	0	1546
4|CRko|sg_hCBR4_04|CBR4	GTTTACAGTGCCAGTAAAGG	CBR4	1289	2880	5819	316	1	0	0	1	0	0	750	0	0	2	0	0	1290
4|CRko|sg_hCBR4_05|CBR4	GGAGGGTCTATTGTTAATGT	CBR4	1330	1552	2515	715	2689	0	0	3427	2	2	342	0	0	0	0	0	1130
4|CRko|sg_hCBR4_06|CBR4	GTACCTACCGCCGAGGTCAC	CBR4	1545	673	1936	1148	0	1	2377	2	2	2	0	0	1757	1	5057	0	1475
4|CRko|sg_hCBR4_07|CBR4	TAAATGCAGCTGGTATTAAC	CBR4	574	2502	2578	1438	0	0	0	0	0	2	771	0	0	0	5641	4893	1214
4|CRko|sg_hCBR4_08|CBR4	AAGAACAAAAACTGAAGATA	CBR4	2849	2278	1886	1222	0	0	1	2	0	4190	0	1	7382	1	0	0	1066
4|CRko|sg_hCBR4_09|CBR4	TGACCTGTAAAGCTGCCATG	CBR4	1895	5640	4028	2655	3	2	1	1854	2	5948	2747	0	3	1798	3438	0	1413
4|CRko|sg_hCBR4_10|CBR4	GAAGAGCTGGAGAAACATTT	CBR4	1663	2202	5208	2077	4278	1	1	1	1	1	2207	0	9373	2037	2	1767	1166
4|CRko|sg_hCBWD2_01|CBWD2	ACCACTGGATTGGCAGACCC	ZNG1B	1982	2	882	1	1	0	699	0	1	0	0	0	0	4020	0	2810	1479
4|CRko|sg_hCBWD2_02|CBWD2	AGAAATTAAGAGCGACAATT	ZNG1B	2252	1842	4728	135	2482	4	1409	4	1	3	1351	0	1	0	0	0	1204
4|CRko|sg_hCBWD2_03|CBWD2	TTAGCAGAAGAGAAACCTGA	ZNG1B	672	671	2795	4155	0	1	1	1884	1238	2	679	0	0	939	1	2	1273
4|CRko|sg_hCBWD2_04|CBWD2	TTGTCCTGAATTGGTTCCCA	ZNG1B	865	4240	977	2	1	0	0	1	0	1	764	0	0	8943	0	0	1101
4|CRko|sg_hCBWD2_05|CBWD2	TGTAGGTATCATAACTATAG	ZNG1B	566	2424	2164	0	4018	0	1	1	541	5667	547	1	2	1	2	1	1038
4|CRko|sg_hCBWD2_06|CBWD2	TTGGTATTCTCCAGGGACAA	ZNG1B	96	837	4025	553	1	0	0	0	1	1	0	0	0	0	0	0	1157
4|CRko|sg_hCBWD2_07|CBWD2	ACCTGGGTCTGCCAATCCAG	ZNG1B	4564	2445	4850	897	1	0	1	0	1	1	643	0	1	1	0	7073	1334
4|CRko|sg_hCBWD2_08|CBWD2	ACTATAGTGGATTCAAAATA	ZNG1B	1004	2330	6095	57	1	1	3	1942	2	0	1	0	0	0	0	2354	1026
4|CRko|sg_hCBWD2_09|CBWD2	CTTGATACAGAATCTCCTGT	ZNG1B	480	1194	1069	0	0	0	0	0	0	0	0	0	0	0	0	0	1379
4|CRko|sg_hCBWD2_10|CBWD2	TCCTTTCAGACTTACCAAGG	ZNG1B	455	541	1719	2635	0	1	0	0	0	1	0	1	0	0	0	1465	683
4|CRko|sg_hCBX3_01|CBX3	AAACAGGCTGACAAACCAAG	CBX3	1419	2864	7078	3871	1	1	0	0	1	1	2	0	0	12013	1	0	1394
4|CRko|sg_hCBX3_02|CBX3	AAAGCTGGCAAAGAAAAAGA	CBX3	1399	2325	1136	1689	1	3	0	1	3717	2	1282	1	1	2371	5805	0	1134
4|CRko|sg_hCBX3_03|CBX3	ACACAGTGCTGACAATACTT	CBX3	472	1356	1013	143	6080	0	0	3017	2	4	681	1	1	24113	2	3276	1350
4|CRko|sg_hCBX3_04|CBX3	AGAGCCTGAAGAATTTGTCG	CBX3	2026	2252	3636	5786	273	1	2	3188	3	5136	2048	2	0	2769	8857	0	1237
4|CRko|sg_hCBX3_05|CBX3	TAGATCGACGTGTAGTGAAT	CBX3	711	2856	1705	44	0	0	0	0	0	1	833	0	0	4886	0	0	1126
4|CRko|sg_hCBX3_06|CBX3	AAACAGGAAAGATTCAGATG	CBX3	1090	1362	2126	7898	3083	1	1	4184	1	3	822	0	1	4964	0	4643	1193
4|CRko|sg_hCBX3_07|CBX3	AGATGAGGCAGACTTGGTGC	CBX3	261	2441	2998	2	6522	2	1	4957	0	2	1	0	0	2449	1	0	1470
4|CRko|sg_hCBX3_08|CBX3	GGCCTCCAACAAAACTACAT	CBX3	711	2035	1606	2041	4	1	0	2810	2	1602	1345	0	0	0	1	0	1299
4|CRko|sg_hCBX3_09|CBX3	AAAGAGTAAAAAAGTTGAAG	CBX3	359	3103	1879	678	1	1	1	0	2	0	0	1	4749	2288	0	4761	1110
4|CRko|sg_hCBX3_10|CBX3	CTAGATCGACGTGTAGTGAA	CBX3	870	640	89	947	1	1	0	6495	0	2	2	0	0	4146	8861	2	1154
4|CRko|sg_hCBX5_01|CBX5	ACCCAGGGAGCACAATACTT	CBX5	1835	1136	3944	2423	0	5675	1	2361	0	1	0	1	3	1810	9083	3521	1323
4|CRko|sg_hCBX5_02|CBX5	AGAAGTCAGAAAGTAACAAG	CBX5	339	2668	3637	317	6231	1	1	3	4725	4	924	1	3	3	2	5	1301
4|CRko|sg_hCBX5_03|CBX5	CAGAGCAATGATATCGCTCG	CBX5	4269	3090	3513	4364	6313	0	3	1775	873	1	2	1	1587	18795	2	7985	1495
4|CRko|sg_hCBX5_04|CBX5	GAAGGTGCTAGACAGGCGCG	CBX5	1617	1646	2591	1458	1	0	0	1	0	1	0	0	2915	1117	7	0	1611
4|CRko|sg_hCBX5_05|CBX5	AGGGTGAAAATAATAAACCC	CBX5	397	3802	100	157	10800	8943	1	7976	4105	1	1	1	1	0	5	2	1157
4|CRko|sg_hCBX5_06|CBX5	GCAGAGCAATGATATCGCTC	CBX5	1140	779	4454	5349	0	1	0	1	0	0	1	0	0	0	1	1202	1511
4|CRko|sg_hCBX5_07|CBX5	AAGTGGAATATCTACTGAAG	CBX5	764	3537	1567	6	5217	1	1	1	2028	0	1	0	1	0	0	6843	1243
4|CRko|sg_hCBX5_08|CBX5	TAAATTCAGAAATTAGCTCA	CBX5	477	2627	3670	140	1	0	0	2	0	0	2	0	0	4542	0	2935	1067
4|CRko|sg_hCBX5_09|CBX5	GGATGAGGAGGAGTATGTTG	CBX5	4	5468	5105	2753	2	2	2	3	1	2	2520	0	0	1	9085	0	1331
4|CRko|sg_hCBX5_10|CBX5	GGGTGAAAATAATAAACCCA	CBX5	1538	1962	209	2	0	0	0	0	0	0	0	0	0	0	0	0	1212
4|CRko|sg_hCCAR2_01|CCAR2	AACGGACACTGATCTCCCAG	CCAR2	2524	2071	4039	2674	1	0	2	6	0	3	2966	0	2	0	2514	0	1429
4|CRko|sg_hCCAR2_02|CCAR2	ACTCCAAGAAACGCAAACAG	CCAR2	1219	2001	7092	1701	2	1	459	1	4417	5093	2	0	0	0	2	1	1324
4|CRko|sg_hCCAR2_03|CCAR2	GCACGGACAGAAAATCTGAG	CCAR2	2984	3826	2820	0	4682	2	1	0	3	5	1	0	0	4225	4850	6686	1393
4|CRko|sg_hCCAR2_04|CCAR2	TTACCTTCGAACTATAAGCG	CCAR2	2258	1738	394	2	0	1	5450	2	1	3	1343	0	0	4011	0	4801	1171
4|CRko|sg_hCCAR2_05|CCAR2	GGCATGATGGTCCAGACATC	CCAR2	1434	622	8019	798	1950	1	1	1	0	1	1510	0	0	0	0	3077	1493
4|CRko|sg_hCCAR2_06|CCAR2	GGGATGCCGAACCTACCTGA	CCAR2	663	2289	2639	1164	0	2	1	4	6276	3	142	0	11408	1	6045	1	1463
4|CRko|sg_hCCAR2_07|CCAR2	AGGAGATATGAATACCTGGT	CCAR2	566	2464	4418	2629	3	1	0	6465	2	3378	1	0	5358	6711	0	0	1263
4|CRko|sg_hCCAR2_08|CCAR2	ATGGGATTGTGGAGGATCGG	CCAR2	1965	2460	3167	2137	6079	3	3	0	2	0	1206	0	0	11110	8007	1	1351
4|CRko|sg_hCCAR2_09|CCAR2	GGTGAAGTGTGTGGGATGTT	CCAR2	2690	517	1075	1411	6067	2	1	3	3	461	1135	2	0	1	3	26695	1290
4|CRko|sg_hCCAR2_10|CCAR2	AAGCAGCAGACACTTCTAGA	CCAR2	2214	4574	2435	1289	2511	3	0	0	0	0	0	0	0	0	5310	0	1353
4|CRko|sg_hCCDC137_01|CCDC137	ATAATCTCCCGGAGCCGGAA	CCDC137	1054	261	4	7825	4636	0	0	0	0	0	519	0	0	0	0	0	1298
4|CRko|sg_hCCDC137_02|CCDC137	CAGTCCCCAAGTTCAAACAG	CCDC137	1854	1331	4789	930	6096	1	1	0	0	1	113	0	0	0	1	11507	1332
4|CRko|sg_hCCDC137_03|CCDC137	GCTGTTCCTCAGCAAGAACC	CCDC137	572	2345	5	1133	2188	1	0	2	1172	0	0	0	0	1	0	0	1497
4|CRko|sg_hCCDC137_04|CCDC137	GGCGACTAGATAAAGTCCGA	CCDC137	1894	1339	326	956	1	0	4896	2	2	0	418	1	1	3755	1	0	1495
4|CRko|sg_hCCDC137_05|CCDC137	TCAGCAAGAACCAGGCCATC	CCDC137	2411	1273	2257	6449	0	1	1	3	0	0	0	0	5010	2708	0	0	1508
4|CRko|sg_hCCDC137_06|CCDC137	GGTGACCTTCAGAAAGACAT	CCDC137	1	1301	1620	6454	1	5948	0	1571	3	1	0	0	0	0	0	1	1299
4|CRko|sg_hCCDC137_07|CCDC137	GCCCAAGAACCAGGACGAAC	CCDC137	1510	1263	437	476	1	2	1	1	1	0	1	0	0	9676	10	0	1588
4|CRko|sg_hCCDC137_08|CCDC137	TTGCTGCATGCGGTGGATAT	CCDC137	755	1426	199	8	0	0	0	0	0	0	0	0	0	0	0	0	1174
4|CRko|sg_hCCDC137_09|CCDC137	AAGGAATCTCCTGTTCGTCC	CCDC137	3500	4574	3114	1367	1196	5813	0	3	4010	0	2	10388	0	1	0	9105	1304
4|CRko|sg_hCCDC137_10|CCDC137	CAAGTTCAAACAGAGGAAGG	CCDC137	1402	1139	2073	0	1	0	5687	2505	3	4	2	1	5086	0	16002	1	1351
4|CRko|sg_hCCDC142_01|CCDC142	ACTGGGCGGCTAGTCCGATG	CCDC142	1371	1657	2428	7104	0	1	0	2475	1	0	0	0	1	0	0	0	1405
4|CRko|sg_hCCDC142_02|CCDC142	TGAGTCGCACAGCCGACTGT	CCDC142	1548	1560	598	2766	1	2	1	4498	2	2	834	1	0	0	5746	0	1537
4|CRko|sg_hCCDC142_03|CCDC142	TGTGCTCCGCCTCTTGACGG	CCDC142	2166	3954	5988	12	0	0	0	0	0	717	0	0	1	0	0	0	1497
4|CRko|sg_hCCDC142_04|CCDC142	TTCGAGAGCCCAGGTTACGA	CCDC142	1660	1513	6	1219	1	0	0	0	1	1	0	0	0	0	0	0	1312
4|CRko|sg_hCCDC142_05|CCDC142	CAGAGTCTGGACCTAAATCT	CCDC142	2024	2776	4701	3526	0	1	0	0	2	1	709	0	0	2577	5263	0	1245
4|CRko|sg_hCCDC142_06|CCDC142	AGGAGGGGGATCTGCTACCA	CCDC142	1127	1789	1056	846	0	0	0	1	4240	1	1	0	0	1368	1	0	1434
4|CRko|sg_hCCDC142_07|CCDC142	AAAGCCTTGAGCCACGTCCC	CCDC142	1042	754	2028	862	1	2	0	2	0	2	892	0	1	2740	0	5799	1504
4|CRko|sg_hCCDC142_08|CCDC142	CTCAGAGGAAAGCTTAGCTC	CCDC142	362	436	1222	2797	7418	6770	2	2	4	574	810	0	1	1	4	3	1014
4|CRko|sg_hCCDC142_09|CCDC142	ACCCCCAAGAGCTGATCCCA	CCDC142	3259	1064	1730	5754	0	1	4337	1	2	1	1941	0	0	0	0	2	1573
4|CRko|sg_hCCDC142_10|CCDC142	TAGTCCTCGCTCACATCCGC	CCDC142	1019	3773	3178	854	0	0	1	4416	1	1	0	0	0	4384	0	1	1323
4|CRko|sg_hCCDC174_01|CCDC174	AAACATAAAGGAAAAGCGAA	CCDC174	1027	2114	2241	707	2690	0	0	0	1	0	796	0	1	2123	0	0	1136
4|CRko|sg_hCCDC174_02|CCDC174	ACTTCAGCGCCAGCAATGGG	CCDC174	1593	754	2917	829	0	1	1	2	1	0	1530	0	0	6967	2	2973	1400
4|CRko|sg_hCCDC174_03|CCDC174	ATCTGGAGCAAACAGAATGT	CCDC174	788	1845	82	1264	0	1	6009	0	2	2	0	0	0	0	0	0	1250
4|CRko|sg_hCCDC174_04|CCDC174	GAGGCCCGGCAACTTGGTGT	CCDC174	1176	1018	1138	928	12075	1	1	1	2413	0	755	0	0	2	2	0	1365
4|CRko|sg_hCCDC174_05|CCDC174	TCATAATGTACGGGCCCCAT	CCDC174	300	1090	2946	2815	1	1	0	0	1	0	1190	11226	1	2409	620	1	1234
4|CRko|sg_hCCDC174_06|CCDC174	CTGTTCACGCAGCATCTCTA	CCDC174	1737	0	1343	0	0	0	0	0	0	0	0	0	0	0	0	0	1337
4|CRko|sg_hCCDC174_07|CCDC174	ATGACTAAAGGAGACTTTAT	CCDC174	343	2113	565	4427	2	2	318	1	6777	4	1	0	1	1	1	1	1095
4|CRko|sg_hCCDC174_08|CCDC174	AGACAAGCGCAAAGAAATGG	CCDC174	1242	1271	3127	779	0	0	2	0	0	2	1199	0	1	0	0	0	1228
4|CRko|sg_hCCDC174_09|CCDC174	AGATGGATAAAAATCTTCAG	CCDC174	1987	951	3474	588	1	1	0	0	0	0	0	0	0	1	0	2732	1111
4|CRko|sg_hCCDC174_10|CCDC174	AGAACTTCAGCGCCAGCAAT	CCDC174	742	3393	2148	41	1239	1	0	3	3	4	1504	1	2	0	2944	1	1291
4|CRko|sg_hCCDC25_01|CCDC25	AAAGGTAAAAATTGTGACAG	CCDC25	5123	3553	2618	3514	1	3	2	0	0	0	2651	0	0	0	5625	0	1116
4|CRko|sg_hCCDC25_02|CCDC25	CAGTTACCTTATGTAATCGA	CCDC25	61	1	79	381	0	1	0	0	1	0	1246	0	1	0	0	0	1141
4|CRko|sg_hCCDC25_03|CCDC25	TCTGCCTACACTATTTACAT	CCDC25	690	282	2150	2566	0	0	2	5258	1	1	731	0	0	0	0	1	1173
4|CRko|sg_hCCDC25_04|CCDC25	TTAATGTGGTATATACGCCG	CCDC25	2480	601	2646	1025	1	1	0	1	0	1	1613	0	0	0	8220	5	1113
4|CRko|sg_hCCDC25_05|CCDC25	ATGGCTGGCCTGAAGATATC	CCDC25	550	2840	916	1352	10019	1	0	3	4	1	1	1	0	1	0	0	1266
4|CRko|sg_hCCDC25_06|CCDC25	GGACTGTGCCCACCTTGTGA	CCDC25	2912	1420	1092	5091	6304	0	0	0	2	2	1471	0	0	2491	1	1	1527
4|CRko|sg_hCCDC25_07|CCDC25	GAATATAGAAGACATCCCAA	CCDC25	2130	2585	5237	3	10	0	0	0	2	1	0	0	0	0	0	0	1205
4|CRko|sg_hCCDC25_08|CCDC25	TGGGGCAGATAGGCTTTCAC	CCDC25	1657	617	908	3	0	1	3	0	0	0	1112	0	9385	1	2	0	1372
4|CRko|sg_hCCDC25_09|CCDC25	CAAGATGAACAACGTTAATG	CCDC25	645	1	2209	718	2	7190	5720	1	1	1	1	0	1	0	7	0	1294
4|CRko|sg_hCCDC25_10|CCDC25	GTTACTTACCAGATATCTTC	CCDC25	1872	1090	1473	409	1699	1	4180	0	2226	2	1	0	1	1	2	1	1132
4|CRko|sg_hCCDC32_01|CCDC32	GAAGTGTATTTAGCATCTCT	CCDC32	2314	1613	6	1603	3024	1	1	1822	1	7701	0	1	3	0	5222	1	1171
4|CRko|sg_hCCDC32_02|CCDC32	GGAGTCTGAGAATGCATTGT	CCDC32	974	475	4977	1	0	1	0	1	2	2673	1	0	14895	0	1	3830	1402
4|CRko|sg_hCCDC32_03|CCDC32	TACACTTCTGAATCCTGCAA	CCDC32	2847	485	1278	81	0	0	0	2	2	0	1025	0	0	0	3546	0	1202
4|CRko|sg_hCCDC32_04|CCDC32	TTGTTCAGGATTTGGCAGAC	CCDC32	1	1028	4467	1070	1247	6537	0	2379	1	1	1	0	3	1	0	0	1257
4|CRko|sg_hCCDC32_05|CCDC32	AAGATCTGGCCAGGATCTCT	CCDC32	1954	1828	4221	925	1	0	2	1	2	1	1634	0	4512	5655	3969	0	1083
4|CRko|sg_hCCDC32_06|CCDC32	AAGAATCAAAGGTTTAAATC	CCDC32	3823	555	1641	3189	2	5963	1	0	1443	0	0	0	0	0	0	0	1006
4|CRko|sg_hCCDC32_07|CCDC32	CCCAAGCCAAGAAGGAATGC	CCDC32	1235	1671	2350	9	0	1	0	0	2834	0	3	1	0	4919	0	0	1485
4|CRko|sg_hCCDC32_08|CCDC32	GAATCCTGCAAGGGAGCCCA	CCDC32	1156	1924	4011	1698	1	1	2	0	3	9822	0	0	1057	2	7602	1843	1425
4|CRko|sg_hCCDC32_09|CCDC32	AGGTGAAGGCCAGAGGGAGG	CCDC32	2197	1460	5099	1244	2	0	1	1	1	1	1	9542	0	0	0	0	1426
4|CRko|sg_hCCDC32_10|CCDC32	ATACACTTCTGAATCCTGCA	CCDC32	855	1178	4738	2174	0	0	0	2852	0	0	5	0	0	0	0	0	1119
4|CRko|sg_hCCDC50_01|CCDC50	AACACTTCACCACTGATCGT	CCDC50	2463	1322	2458	1788	0	0	1384	0	0	1	39	0	0	3003	0	0	1398
4|CRko|sg_hCCDC50_02|CCDC50	ATTTGGCATCGAACGTTCAG	CCDC50	2032	5153	1311	399	2	1	3376	1	1	3777	3	0	3	5275	16	2502	1390
4|CRko|sg_hCCDC50_03|CCDC50	CAAGGAAGTTGTATATGGGA	CCDC50	3076	1641	6437	45	0	1	391	6	0	0	1246	0	1	0	0	0	1157
4|CRko|sg_hCCDC50_04|CCDC50	CAGACCAACCAGGGTCAAGG	CCDC50	2439	1335	5278	3469	2	0	0	2	2	3121	0	0	0	2914	5	0	1500
4|CRko|sg_hCCDC50_05|CCDC50	ACTGCAAGGAAGTTGTATAT	CCDC50	706	732	3917	2761	13	1	1	3941	3215	2	1526	0	1	0	0	5581	1139
4|CRko|sg_hCCDC50_06|CCDC50	GTAACTATCTGCATAAGCAC	CCDC50	3	1305	1732	14	2	3	6	7	3	2	1	21815	58533	2	1	2	1161
4|CRko|sg_hCCDC50_07|CCDC50	AAGCGCTACAAAGACCTGTG	CCDC50	3197	2896	8190	4897	135	0	1	1	1592	2	1	0	0	2466	6946	1	1482
4|CRko|sg_hCCDC50_08|CCDC50	AGAGAAACCAGAACATCCAC	CCDC50	456	2102	4421	629	0	0	0	0	0	0	3421	0	0	4883	2543	0	1493
4|CRko|sg_hCCDC50_09|CCDC50	TAGCCACCTGGAGATCATGC	CCDC50	3127	1655	1479	553	2713	1	0	0	1	2	0	0	2	0	7716	1	1342
4|CRko|sg_hCCDC50_10|CCDC50	TTCCTGCAGGCTGTGAGCCA	CCDC50	3694	1671	701	881	0	0	0	1	1	2528	1870	0	0	0	0	9844	1290
4|CRko|sg_hCCDC68_01|CCDC68	AAATCACAAACTAGATGCAA	CCDC68	2687	410	2646	982	1	1	0	2425	1	1	1626	1	12979	0	9542	0	1024
4|CRko|sg_hCCDC68_02|CCDC68	AGCGGACGTAGACTCATACA	CCDC68	1140	986	2795	1550	2	2	0	2545	0	1	2605	1	10657	0	0	1246	1474
4|CRko|sg_hCCDC68_03|CCDC68	GAACTACTCTGCAAAAGATC	CCDC68	4001	2713	6519	1023	1	4	10351	3608	536	1	867	0	9900	5	5456	1	1233
4|CRko|sg_hCCDC68_04|CCDC68	GGACAGTAAACAATTACTCC	CCDC68	1003	1209	5041	3155	0	0	1	1	0	66	831	0	0	0	0	0	1358
4|CRko|sg_hCCDC68_05|CCDC68	CACTGTGGAAACCTTCAACA	CCDC68	2693	2592	1715	2146	0	1	1	2	2071	1	0	1	1173	0	10591	6353	1297
4|CRko|sg_hCCDC68_06|CCDC68	ACTGCGCAGGTTCTGATGTT	CCDC68	2570	3637	3351	3423	0	0	2	2	5917	0	872	0	0	0	13965	1	1300
4|CRko|sg_hCCDC68_07|CCDC68	AAATCTCCCTCTGAAGATCC	CCDC68	1450	807	2325	274	0	0	0	1653	0	0	0	0	0	2417	0	1	1186
4|CRko|sg_hCCDC68_08|CCDC68	CCAGTTGCCAGGATCTTCAG	CCDC68	2394	2813	2756	2994	3495	3961	1	1	1985	3	1	2	0	1	1	9947	1366
4|CRko|sg_hCCDC68_09|CCDC68	CAGTTGCCAGGATCTTCAGA	CCDC68	1216	2296	263	8769	0	2	0	0	0	1	1	0	1	5039	1	4549	1278
4|CRko|sg_hCCDC68_10|CCDC68	CCTGCGCAGTGTCATCCAGG	CCDC68	4351	2046	4333	3094	2	6120	2	4	3913	2	4421	1	2	1	10787	6098	1306
4|CRko|sg_hCCDC88A_01|CCDC88A	AACGTTGGTTACACTACGTG	CCDC88A	831	3328	1574	134	1	0	1	2464	1529	0	961	0	1	0	0	1	1251
4|CRko|sg_hCCDC88A_02|CCDC88A	AGAAGAGCTTCGGACTACTG	CCDC88A	1769	2792	2437	1367	0	0	0	0	1444	0	0	0	1	0	0	0	1401
4|CRko|sg_hCCDC88A_03|CCDC88A	GAATCTCTTATCTCTAAACA	CCDC88A	1085	4417	1511	1247	3	0	0	3151	0	4	1487	0	5174	7453	4	0	1099
4|CRko|sg_hCCDC88A_04|CCDC88A	GGTTGCCGCACATATTCAAG	CCDC88A	499	2847	1025	4976	4351	0	1	1	2326	1	1097	0	0	4544	0	0	1415
4|CRko|sg_hCCDC88A_05|CCDC88A	TAATTCATCTCGGTACATTC	CCDC88A	2055	1072	908	2	0	0	0	1036	3255	1	1	0	0	0	0	1039	1175
4|CRko|sg_hCCDC88A_06|CCDC88A	ATGGATGAATCATTACATCT	CCDC88A	404	1396	3154	5641	2	0	0	0	0	0	1511	0	0	0	4991	0	1206
4|CRko|sg_hCCDC88A_07|CCDC88A	ATGAACAAAGTACTGATGAC	CCDC88A	923	1183	664	4126	1	1	0	1726	3337	4	1	10189	0	1	0	0	1276
4|CRko|sg_hCCDC88A_08|CCDC88A	TTATATTACAACCTGAAGCT	CCDC88A	729	1734	0	64	0	0	1	0	1962	2	818	1	1	0	0	1	882
4|CRko|sg_hCCDC88A_09|CCDC88A	GTAGTTCACTCTCTAATTGC	CCDC88A	1746	484	594	660	0	0	2	0	0	1	0	0	0	2434	0	3813	1220
4|CRko|sg_hCCDC88A_10|CCDC88A	TATCTGGGACCGCTGCCTTA	CCDC88A	215	2355	2101	3154	2	0	3422	1	0	0	2	0	1	0	0	15632	1339
4|CRko|sg_hCCHCR1_01|CCHCR1	CGCAAGGTCCACACCATTCG	CCHCR1	727	2444	2641	6934	1	6057	1	2	1	1	2	0	0	4865	9376	0	1503
4|CRko|sg_hCCHCR1_02|CCHCR1	CTCGTGAGCCTGTGTCAAAG	CCHCR1	2728	5375	1805	3359	2	2	2	2	0	4479	0	0	2	1	2	0	1292
4|CRko|sg_hCCHCR1_03|CCHCR1	TGAGGTCCACAGCCAGACAT	CCHCR1	484	192	3094	696	13	0	0	1	3659	0	1600	0	1	0	0	0	1388
4|CRko|sg_hCCHCR1_04|CCHCR1	AACGGGATGTTTCCAGTGAC	CCHCR1	2221	2206	1359	3520	1	3776	8287	5	2	2	756	0	1	2	1	1	1302
4|CRko|sg_hCCHCR1_05|CCHCR1	AAGGGGCCGAGCTTGAAAGT	CCHCR1	1018	2646	45	362	4079	8665	3	4	2422	3	1862	1	1	0	7608	2882	1320
4|CRko|sg_hCCHCR1_06|CCHCR1	TGCGGACAGCATAGCTGAGT	CCHCR1	2	1184	816	907	0	1	1	0	0	1	1329	0	2	0	0	2581	402
4|CRko|sg_hCCHCR1_07|CCHCR1	GAGGTGGAGGTGGAGCGTAT	CCHCR1	1620	2	2944	1839	1109	0	1	2380	3894	2	0	1	5336	0	0	0	1417
4|CRko|sg_hCCHCR1_08|CCHCR1	TGGCACTTCCTGGTAAACTC	CCHCR1	473	3	1428	2076	7	0	0	0	2	0	0	0	0	0	0	0	1251
4|CRko|sg_hCCHCR1_09|CCHCR1	CCCCAGCCAAAGCAGCACGC	CCHCR1	2782	3819	3157	2737	2844	1	0	2	0	0	0	0	0	2551	0	2722	1614
4|CRko|sg_hCCHCR1_10|CCHCR1	CTGGCCAGAGGTGAGAAAGG	CCHCR1	1256	1654	2069	551	1	2	2	2303	3510	1	1981	1	0	2866	0	0	1451
4|CRko|sg_hCCNDBP1_01|CCNDBP1	CAGATGCCTCAGATACCAAG	CCNDBP1	1100	4221	7417	2944	0	0	0	3	2	1	1155	0	1	6681	0	7667	1487
4|CRko|sg_hCCNDBP1_02|CCNDBP1	CTCTCGATTAAACTCCTCGG	CCNDBP1	319	2197	5439	1518	2	1	1060	2	4363	2995	2	1	0	4597	0	1	1279
4|CRko|sg_hCCNDBP1_03|CCNDBP1	GAAGACTATGGTCAGAGTCG	CCNDBP1	2796	2225	1037	518	0	1	0	4327	3319	1	0	0	2	3160	0	0	1241
4|CRko|sg_hCCNDBP1_04|CCNDBP1	TCAGGACTTGTATTGGTCAG	CCNDBP1	652	1468	4074	2154	1	0	0	2325	0	0	1430	0	0	40	0	0	1194
4|CRko|sg_hCCNDBP1_05|CCNDBP1	GAAGAATGTGACCCTTACTC	CCNDBP1	628	1305	0	2754	1	0	0	0	0	0	1379	0	4333	0	0	0	1373
4|CRko|sg_hCCNDBP1_06|CCNDBP1	GCCCCGTACCAGCTTTCTCA	CCNDBP1	2859	1595	3854	6	1	1	0	1	2	2298	1753	0	1	3711	1	0	1366
4|CRko|sg_hCCNDBP1_07|CCNDBP1	TGGAAGCTGAGAGAAGACTA	CCNDBP1	646	411	992	108	3	3	0	0	4023	1	902	0	0	2907	6602	1599	1226
4|CRko|sg_hCCNDBP1_08|CCNDBP1	CCAGCAATCAGGACTTGTAT	CCNDBP1	3287	1400	3421	610	7215	8358	0	3	4075	1	1	1	2	4	1	3873	1324
4|CRko|sg_hCCNDBP1_09|CCNDBP1	TGGCATCACTACCTCTGAGT	CCNDBP1	1	2236	1	0	3	1	1	1	2	4782	1666	0	0	0	0	2269	1380
4|CRko|sg_hCCNDBP1_10|CCNDBP1	ACAAGTCCATGCTGCCATCA	CCNDBP1	2668	2107	3087	4	0	1	0	3687	0	0	0	0	1	0	4617	6475	1489
4|CRko|sg_hCCNI_01|CCNI	AGATGTGGAAAGTGAATGTG	CCNI	2002	2543	3482	6126	2	3	1	4095	1714	1753	1	0	0	0	1	0	1309
4|CRko|sg_hCCNI_02|CCNI	AGGCCTAGTTGACACTGCAA	CCNI	1103	387	563	1524	1	0	0	2	1720	2	1	18889	3844	0	0	2	1329
4|CRko|sg_hCCNI_03|CCNI	CATACAGTGAAGTAGTTGCT	CCNI	425	1548	3241	1279	1	1	1	1	1576	1	2	0	0	3147	460	1549	1337
4|CRko|sg_hCCNI_04|CCNI	GTGCCACAAGCTCCCGACAA	CCNI	2332	716	2902	793	0	0	1	1	0	3665	773	0	0	1992	3751	0	1515
4|CRko|sg_hCCNI_05|CCNI	GTTGGAAAAGGCAATCACTA	CCNI	1639	1357	4719	1340	0	4268	1	5	1278	3911	2	1	0	0	1	1	1244
4|CRko|sg_hCCNI_06|CCNI	AATTCCAGTACTAAAGGTAT	CCNI	2318	3727	1735	2626	2610	1	2600	0	0	0	1	1	0	1	0	1294	1129
4|CRko|sg_hCCNI_07|CCNI	ATTGAGCCCATCTCAACATT	CCNI	1977	1095	3429	626	1	0	1	1	0	1	745	0	1	10694	0	3872	1271
4|CRko|sg_hCCNI_08|CCNI	GCTCCCAGTTGATCCATTGT	CCNI	1251	1670	2739	650	0	0	0	0	0	0	0	0	0	1	0	0	1492
4|CRko|sg_hCCNI_09|CCNI	TAGCCAGAGCAAATGTTTCT	CCNI	1961	642	2710	1835	2	0	3	3482	3800	1	1491	0	0	0	4887	0	1210
4|CRko|sg_hCCNI_10|CCNI	GAGAATGGAGAGAATTATTC	CCNI	1511	3	4184	6617	0	0	0	2181	1	0	0	0	1	0	0	0	1143
4|CRko|sg_hCCNT2_01|CCNT2	AATAATTCTAGAGTAACTGT	CCNT2	1018	1334	471	1214	0	0	0	0	0	1	0	0	0	0	0	0	1136
4|CRko|sg_hCCNT2_02|CCNT2	ATACGGTTTATCATCACACC	CCNT2	1	712	1629	5	2	0	1	7120	1534	469	847	0	1	0	0	1	1181
4|CRko|sg_hCCNT2_03|CCNT2	GAGTAGTGGAAATTGGCCCA	CCNT2	1	1795	956	565	0	1	0	1	0	1850	0	1	0	960	1	0	1331
4|CRko|sg_hCCNT2_04|CCNT2	TCACATTTAGTATCCAGCAG	CCNT2	2	3167	4947	957	2	0	1785	1	0	1	0	0	0	3507	0	0	1226
4|CRko|sg_hCCNT2_05|CCNT2	AAATGTACCCAGTTAGTAAG	CCNT2	580	980	429	1883	0	1	1	0	386	2	0	0	0	4836	2	0	1237
4|CRko|sg_hCCNT2_06|CCNT2	GTTTATTGTAAGCTGAGAGC	CCNT2	329	750	4410	2520	1	1	0	0	0	0	0	2	0	0	0	0	1176
4|CRko|sg_hCCNT2_07|CCNT2	GGATCATTATATAGCTGCCC	CCNT2	690	1092	5712	1877	5858	0	0	0	0	3660	0	0	0	1	1	0	1208
4|CRko|sg_hCCNT2_08|CCNT2	GTGATATAGAAGGTCCCTGC	CCNT2	623	1215	3088	143	0	0	0	6201	0	0	0	0	1	0	157	0	1374
4|CRko|sg_hCCNT2_09|CCNT2	GATAAACCGTATGAAGTACT	CCNT2	523	1112	612	1066	1	1	2788	1	1	0	1616	0	0	0	0	2	1241
4|CRko|sg_hCCNT2_10|CCNT2	GAAACCAAAAGTAGATGGAC	CCNT2	639	2721	3316	3	0	3	0	0	0	0	0	0	1	0	107	1	1441
4|CRko|sg_hCCNYL1_01|CCNYL1	AGCGACCGCGAGATGCCCGA	CCNYL1	2469	4243	7405	5979	2711	0	0	2999	4	3080	1	0	0	0	1784	9777	1665
4|CRko|sg_hCCNYL1_02|CCNYL1	GCCCTCTCCGAAATCCAACT	CCNYL1	1646	2352	4137	414	1	2	1	1	2188	3136	726	0	0	2868	1	6345	1394
4|CRko|sg_hCCNYL1_03|CCNYL1	GGACACCGCCTCGTAGATGT	CCNYL1	1818	461	2241	2358	0	2	1	0	1	3	0	0	0	3029	0	0	1448
4|CRko|sg_hCCNYL1_04|CCNYL1	TCAGCGAGAAAAAGTTCCAG	CCNYL1	2087	2162	4187	5011	1	1	1	1	1	1	2204	0	1	9807	0	0	1354
4|CRko|sg_hCCNYL1_05|CCNYL1	CTGTGGTTCTAAGATTAGGC	CCNYL1	428	614	574	1357	4842	1	2	2	0	654	995	0	0	1	5364	1638	1271
4|CRko|sg_hCCNYL1_06|CCNYL1	TATATTACCACATAAAGAAC	CCNYL1	567	818	1	1058	1	2	1	0	1	16687	4	0	3	0	5042	1	999
4|CRko|sg_hCCNYL1_07|CCNYL1	TTCCCCTTCAGGTATCTCCA	CCNYL1	1643	2799	752	1	0	1	0	1	1	0	0	0	0	0	0	3969	1150
4|CRko|sg_hCCNYL1_08|CCNYL1	TGAATGTGCAATAGTAACTT	CCNYL1	815	1190	1759	1206	3	0	1	0	1	2567	1	0	1	0	1	937	1104
4|CRko|sg_hCCNYL1_09|CCNYL1	ACATCTACGAGGCGGTGTCC	CCNYL1	2416	1103	1197	1	1	3	0	0	2	3932	0	0	0	0	1	2	1306
4|CRko|sg_hCCNYL1_10|CCNYL1	TTTACTGTGGTTCTAAGATT	CCNYL1	1438	1407	623	1151	3200	12999	0	1	1	2	2	0	1	0	2	1	1018
4|CRko|sg_hCCT2_01|CCT2	ATCATTGGTTACCATAAGAG	CCT2	1004	656	2413	0	0	0	0	0	0	0	0	0	0	0	0	4352	1143
4|CRko|sg_hCCT2_02|CCT2	CAACCCGCTATGATGGTCTG	CCT2	0	0	541	893	3630	0	0	0	0	0	823	0	1	1	0	0	1428
4|CRko|sg_hCCT2_03|CCT2	GAACGCCTAGCTCTTGTCAC	CCT2	169	1154	669	477	0	0	0	0	0	0	1	0	6094	0	0	0	1377
4|CRko|sg_hCCT2_04|CCT2	GTTGAACGTATTCTTAAGCA	CCT2	649	1061	3663	533	0	0	0	0	0	0	0	0	0	0	0	1271	1198
4|CRko|sg_hCCT2_05|CCT2	CATCCACAGACCATCATAGC	CCT2	1	913	537	2	0	0	0	0	2	0	1534	1	0	4813	0	0	1251
4|CRko|sg_hCCT2_06|CCT2	TGTAGAGTCAACTCTTACCC	CCT2	1	132	958	0	0	0	1	0	0	1249	0	0	0	0	0	0	1201
4|CRko|sg_hCCT2_07|CCT2	TGATAATATGAATTGCCTCC	CCT2	1641	2	952	2	0	0	0	0	0	606	0	0	0	0	0	0	1056
4|CRko|sg_hCCT2_08|CCT2	AGGGTTCAAGATGATGAAGT	CCT2	1	2630	1343	745	0	2	1	5347	2012	0	0	0	0	5	1	0	1193
4|CRko|sg_hCCT2_09|CCT2	TGAGTTCTGCAGTTGATCAT	CCT2	609	715	529	938	3648	0	0	0	0	0	0	0	0	0	0	1555	1189
4|CRko|sg_hCCT2_10|CCT2	TCATCCACAGACCATCATAG	CCT2	0	1120	1504	0	0	0	0	0	1	0	1	0	0	2	0	0	1281
4|CRko|sg_hCCT3_01|CCT3	ATGTGACCCATCCACGTATG	CCT3	574	1091	1466	1	0	0	0	0	0	0	0	0	0	0	0	0	1362
4|CRko|sg_hCCT3_02|CCT3	CTACCAAAGCCATCAGTCGG	CCT3	1406	765	2321	1523	3490	1	0	0	1	1	0	0	0	1	0	1	1482
4|CRko|sg_hCCT3_03|CCT3	GCAGCAGATGCACCCAACAG	CCT3	1154	510	2388	5	0	1	0	0	4	0	2461	0	3	1	7921	0	1701
4|CRko|sg_hCCT3_04|CCT3	TGACATTGAGATTACACGAG	CCT3	1066	1650	924	3	8045	0	1	2	1121	3	2799	0	3735	2281	7099	3	1255
4|CRko|sg_hCCT3_05|CCT3	CTGTGATATTGGCCCGCATA	CCT3	1040	658	771	1214	0	0	0	0	0	0	0	0	0	0	0	0	1302
4|CRko|sg_hCCT3_06|CCT3	ATAGCGCCGCATACGTGGAT	CCT3	0	1355	1248	1251	0	0	0	0	0	0	0	0	0	0	0	0	1376
4|CRko|sg_hCCT3_07|CCT3	AAGCACTGATCACCACTGTT	CCT3	802	1120	1	1	0	0	0	0	0	1780	0	1	0	0	0	0	1370
4|CRko|sg_hCCT3_08|CCT3	TCATCACAATGCCTCCCATT	CCT3	1054	2695	1573	530	3299	1	0	0	1	0	755	0	0	0	1	0	1298
4|CRko|sg_hCCT3_09|CCT3	GATCGAAATTAGCCGGACCC	CCT3	609	926	387	1411	4603	0	0	1	0	1	1	0	0	1	1	0	1406
4|CRko|sg_hCCT3_10|CCT3	CCGGATAGTCAGCCGACCAG	CCT3	429	1116	1392	854	2	1	1	0	1	1421	3456	0	1	1	18	0	1560
4|CRko|sg_hCCT4_01|CCT4	AGCAATGATGACTACTGATG	CCT4	0	0	2	536	0	0	0	2114	0	2	1	0	0	1	0	0	1370
4|CRko|sg_hCCT4_02|CCT4	CAGAAATCTATTCTAAGGTG	CCT4	1140	1665	2670	475	1	0	1	1	0	0	0	0	0	5052	4094	0	1204
4|CRko|sg_hCCT4_03|CCT4	GACTGACATGTCTCGACCTG	CCT4	1340	960	0	686	0	0	0	0	0	0	0	0	0	0	0	1	1437
4|CRko|sg_hCCT4_04|CCT4	GAGAGTGATACCTTTGGCGG	CCT4	695	378	539	0	442	0	0	2285	1	0	0	0	0	0	0	0	1480
4|CRko|sg_hCCT4_05|CCT4	AAACTGAATAAGCCCAATCT	CCT4	624	410	2	1	0	1	0	1991	1	2	2196	0	0	1	5109	1103	1246
4|CRko|sg_hCCT4_06|CCT4	TCATACAGAAATCTATTCTA	CCT4	0	272	0	0	0	0	1	0	0	0	0	0	1	0	0	4971	1144
4|CRko|sg_hCCT4_07|CCT4	CCAGCATGTCAGCAGTAAAT	CCT4	437	0	533	120	0	1	0	0	2	0	0	0	0	0	0	0	1263
4|CRko|sg_hCCT4_08|CCT4	AATATCTCTAAGATCTACAC	CCT4	1	137	1	892	0	0	0	0	0	0	0	0	1	1	0	5209	1055
4|CRko|sg_hCCT4_09|CCT4	AATGACTCAGAAATGATGGT	CCT4	416	962	1367	1579	1	0	0	0	0	0	0	0	0	0	0	2417	1235
4|CRko|sg_hCCT4_10|CCT4	AAGGCTCAAGATATAGAAGC	CCT4	423	587	380	1097	0	1	0	2	3776	1	0	0	0	0	1	0	1270
4|CRko|sg_hCCT6A_01|CCT6A	ACGTGCTAAGGACCAACCTG	CCT6A	1220	665	0	881	3395	1	0	1	1968	2	0	0	1	0	0	0	1555
4|CRko|sg_hCCT6A_02|CCT6A	CAGGGAAACACTTATAGATG	CCT6A	647	508	628	7	103	1	6608	3	0	1231	1	0	1777	4361	0	1	1325
4|CRko|sg_hCCT6A_03|CCT6A	CATCCTAGAATAATCACTGA	CCT6A	1	3	1290	3	3	1	1	1	1	2	2	11237	7761	0	1	1	1279
4|CRko|sg_hCCT6A_04|CCT6A	CTAATGACACGTTACAAGTG	CCT6A	1	529	0	0	0	0	0	0	2008	0	685	0	0	0	0	0	1247
4|CRko|sg_hCCT6A_05|CCT6A	AAGGGCACCATGAAGATGTA	CCT6A	216	0	1545	2	0	0	1	2	0	0	0	0	0	0	0	0	1292
4|CRko|sg_hCCT6A_06|CCT6A	CAGAGCTAAAAGGAGAAATA	CCT6A	2	1	1490	5827	1	0	0	0	0	0	0	0	0	0	0	0	1165
4|CRko|sg_hCCT6A_07|CCT6A	ACTTCTAATGTCCTAATCAT	CCT6A	482	2	1	0	2633	0	1	0	2	2	723	0	0	0	0	1109	1055
4|CRko|sg_hCCT6A_08|CCT6A	ATAAATCTGAAACTGATACA	CCT6A	0	1232	734	1728	0	0	0	0	0	393	0	0	0	0	0	0	1168
4|CRko|sg_hCCT6A_09|CCT6A	GGACGTGCTAAGGACCAACC	CCT6A	1259	1	379	436	0	1	1	0	0	0	0	0	0	2309	0	2526	1503
4|CRko|sg_hCCT6A_10|CCT6A	TAGGTCGTCAAAAGAATTCA	CCT6A	0	0	1269	978	0	0	0	1	0	0	0	0	0	0	0	0	991
4|CRko|sg_hCCT7_01|CCT7	ATAAGCTTGTCCATGCCACG	CCT7	1091	1	2002	0	2073	0	0	0	1	0	0	0	0	0	0	0	1327
4|CRko|sg_hCCT7_02|CCT7	CTTGTCCAAACTCCCCATTG	CCT7	549	646	744	4426	2547	2	3	2718	0	3152	1	0	1	1	0	0	1311
4|CRko|sg_hCCT7_03|CCT7	GATAAGAGTCCACACAGTTG	CCT7	0	516	307	1	0	0	0	0	0	0	0	0	0	0	0	0	1352
4|CRko|sg_hCCT7_04|CCT7	GCAGGTGAAACCCTATGTGG	CCT7	518	0	722	0	0	0	0	0	0	0	2282	0	0	0	0	0	1428
4|CRko|sg_hCCT7_05|CCT7	TGAGGCTGTAAGAACTACCC	CCT7	0	764	1	1	1	0	0	0	0	1	0	0	0	0	525	0	1374
4|CRko|sg_hCCT7_06|CCT7	ATTGAGCCTCCACAGGCCTA	CCT7	2	2214	2838	3149	77	0	0	0	3	1	1	0	0	8556	0	0	1306
4|CRko|sg_hCCT7_07|CCT7	GGAATCAAGAAGGTACAGGG	CCT7	1462	1276	1	2020	1	0	0	0	0	0	1	0	2143	0	0	0	1418
4|CRko|sg_hCCT7_08|CCT7	CAGGGAGCAGAGGAAGCTGC	CCT7	3	1771	4145	50	1	0	0	1	1	0	2203	2	1568	4760	0	0	1577
4|CRko|sg_hCCT7_09|CCT7	TCAGTACTGCCATACCAGCT	CCT7	404	596	1517	0	0	0	9107	0	1	2	0	1	0	0	1	1	1324
4|CRko|sg_hCCT7_10|CCT7	GAGGCTGTAAGAACTACCCT	CCT7	1	617	836	0	0	0	0	0	0	1	1	0	7943	1	3961	0	1393
4|CRko|sg_hCCT8_01|CCT8	AAGCTTATTGCTCAGGCATG	CCT8	536	954	1586	2	2	0	0	5081	1	2	723	1	1	4294	0	0	1247
4|CRko|sg_hCCT8_02|CCT8	AGACTTCATCAATATCTCGA	CCT8	459	1440	494	217	0	0	0	0	0	1	1324	0	895	1	0	0	1271
4|CRko|sg_hCCT8_03|CCT8	CGAAGACTTTGTAAAACTGT	CCT8	619	1414	1448	41	0	2	2	1973	2067	2	792	0	0	1995	4807	3	1334
4|CRko|sg_hCCT8_04|CCT8	CTTTGACTTGTGCATCCATG	CCT8	0	2	823	4109	0	0	2	1	1	2	1	0	0	6734	0	0	1160
4|CRko|sg_hCCT8_05|CCT8	GAACTGATACCAGAGCCCTA	CCT8	1	390	1395	3	1	0	0	0	0	0	738	0	0	0	2	6843	1431
4|CRko|sg_hCCT8_06|CCT8	GCAGAACAACATACCAAATT	CCT8	2	1276	1523	1	1	0	0	2	0	0	1629	0	0	1	0	0	1389
4|CRko|sg_hCCT8_07|CCT8	TCTTTATCAACACTGTTCCC	CCT8	0	1	458	2	4	2	10846	2	0	1106	536	0	0	2669	2	1	1291
4|CRko|sg_hCCT8_08|CCT8	GCAAATGTCGTAGTAACAGG	CCT8	1292	744	710	6	0	0	0	2	635	0	675	1	2917	1	4477	0	1326
4|CRko|sg_hCCT8_09|CCT8	TGCTACAGCTCTTCCTAGAT	CCT8	1809	487	4790	778	2361	1	0	0	0	2	1197	1	0	0	0	0	1242
[truncated: 13,001 more rows]
