# Supplementary material for: Identification of Novel Regulators of LINE-1 Expression via CRISPR/Cas9 Screening
Source: Research Square preprint supplement (doi:10.21203/rs.3.rs-6726282/v1), 2025-06-04
Supplement: Supplementary file 5 [file ede1cfe14c4be16e31cdb8f6.xlsx]

## Sheet: Sample key
ID	Samples	Sample collection day post library infection	Replicate
WA1	WT sorted ORF1p up	Day 14	Replicate 1
WA2	WT sorted ORF1p down	Day 14	Replicate 1
WA5	WT unsorted	Day 14	Replicate 1
WA6	WT unsorted	Day 18	Replicate 1
WB1	WT sorted ORF1p up	Day 14	Replicate 2
WB2	WT sorted ORF1p down	Day 14	Replicate 2
WB5	WT unsorted	Day 14	Replicate 2
WB6	WT unsorted	Day 18	Replicate 2
MA1	MT sorted ORF1p up	Day 14	Replicate 1
MA2	MT sorted ORF1p down	Day 14	Replicate 1
MA5	MT unsorted	Day 14	Replicate 1
MA6	MT unsorted	Day 18	Replicate 1
MB1	MT sorted ORF1p up	Day 14	Replicate 2
MB2	MT sorted ORF1p down	Day 14	Replicate 2
MB5	MT unsorted	Day 14	Replicate 2
MB6	MT unsorted	Day 18	Replicate 2
WT: L1 dual reporter expressing WT ORF2p
MT: L1 dual reporter expressing EN/RT mutant version of ORF2p

## Sheet: Raw data
#seq.ID/s	sequence/s	WA1	WA2	WA5	WA6	WB1	WB2	WB5	WB6	MA1	MA2	MA5	MA6	MB1	MB2	MB5	MB6	KOHGW-80K-EP	Entrez Gene ID	Gene Symbol (original)	Group Name (original)	sgRNA Label (updated 5/6/20)	Gene Symbol (updated)	Library Insert Sequence (5'-ACCG-guide-tracrRNA_HEAT-T6-3')
1|Neg_Control_Human_0001|NegCtrl	GTAGCGAACGTGTCCGGCGT	1898	2494	1264	1346	3	400	1490	817	0	0	1439	667	5501	961	729	1375	3485	n/a	NegCtrl	NegCtrl|01	1|Neg_Control_Human_0001|NegCtrl	NegCtrl	ACCGGTAGCGAACGTGTCCGGCGTGTTTAAGAGCTATGCTGGAAACAGCATAGCAAGTTTAAATAAGGCTAGTCCGTTATCAACTTGAAAAAGTGGCACCGAGTCGGTGCTTTTTT
1|Neg_Control_Human_0002|NegCtrl	GACCGGAACGATCTCGCGTA	1	1764	2194	1882	1	940	1198	1696	14483	4486	2312	1409	7	3266	1792	2733	4809	n/a	NegCtrl	NegCtrl|01	1|Neg_Control_Human_0002|NegCtrl	NegCtrl	ACCGGACCGGAACGATCTCGCGTAGTTTAAGAGCTATGCTGGAAACAGCATAGCAAGTTTAAATAAGGCTAGTCCGTTATCAACTTGAAAAAGTGGCACCGAGTCGGTGCTTTTTT
1|Neg_Control_Human_0003|NegCtrl	GGCAGTCGTTCGGTTGATAT	0	797	1377	1000	1231	594	884	848	9891	1917	1773	551	0	18	1319	1162	2971	n/a	NegCtrl	NegCtrl|01	1|Neg_Control_Human_0003|NegCtrl	NegCtrl	ACCGGGCAGTCGTTCGGTTGATATGTTTAAGAGCTATGCTGGAAACAGCATAGCAAGTTTAAATAAGGCTAGTCCGTTATCAACTTGAAAAAGTGGCACCGAGTCGGTGCTTTTTT
1|Neg_Control_Human_0004|NegCtrl	GCTTGAGCACATACGCGAAT	0	0	1157	827	3	455	357	520	0	1	445	537	2557	1581	751	2181	2407	n/a	NegCtrl	NegCtrl|01	1|Neg_Control_Human_0004|NegCtrl	NegCtrl	ACCGGCTTGAGCACATACGCGAATGTTTAAGAGCTATGCTGGAAACAGCATAGCAAGTTTAAATAAGGCTAGTCCGTTATCAACTTGAAAAAGTGGCACCGAGTCGGTGCTTTTTT
1|Neg_Control_Human_0005|NegCtrl	GTGGTAGAATAACGTATTAC	0	499	1148	834	0	710	273	801	0	1708	707	379	1	915	990	1273	3511	n/a	NegCtrl	NegCtrl|01	1|Neg_Control_Human_0005|NegCtrl	NegCtrl	ACCGGTGGTAGAATAACGTATTACGTTTAAGAGCTATGCTGGAAACAGCATAGCAAGTTTAAATAAGGCTAGTCCGTTATCAACTTGAAAAAGTGGCACCGAGTCGGTGCTTTTTT
1|Neg_Control_Human_0006|NegCtrl	GTCATACATGGATAAGGCTA	0	924	942	949	3503	2096	887	586	0	0	1463	968	0	1910	1607	1551	2678	n/a	NegCtrl	NegCtrl|01	1|Neg_Control_Human_0006|NegCtrl	NegCtrl	ACCGGTCATACATGGATAAGGCTAGTTTAAGAGCTATGCTGGAAACAGCATAGCAAGTTTAAATAAGGCTAGTCCGTTATCAACTTGAAAAAGTGGCACCGAGTCGGTGCTTTTTT
1|Neg_Control_Human_0007|NegCtrl	GATACACGAAGCATCACTAG	3566	534	971	737	0	252	655	910	8876	2	2328	734	0	10	726	724	2280	n/a	NegCtrl	NegCtrl|01	1|Neg_Control_Human_0007|NegCtrl	NegCtrl	ACCGGATACACGAAGCATCACTAGGTTTAAGAGCTATGCTGGAAACAGCATAGCAAGTTTAAATAAGGCTAGTCCGTTATCAACTTGAAAAAGTGGCACCGAGTCGGTGCTTTTTT
1|Neg_Control_Human_0008|NegCtrl	GAACGTTGGCACTACTTCAC	0	2416	1990	1456	2	719	1201	1344	0	786	2078	1152	5762	4006	1982	2966	4836	n/a	NegCtrl	NegCtrl|01	1|Neg_Control_Human_0008|NegCtrl	NegCtrl	ACCGGAACGTTGGCACTACTTCACGTTTAAGAGCTATGCTGGAAACAGCATAGCAAGTTTAAATAAGGCTAGTCCGTTATCAACTTGAAAAAGTGGCACCGAGTCGGTGCTTTTTT
1|Neg_Control_Human_0009|NegCtrl	GATCCATGTAATGCGTTCGA	2	1969	1965	1894	1	811	1256	1040	6374	2094	1747	1361	2389	4161	1300	2311	4163	n/a	NegCtrl	NegCtrl|01	1|Neg_Control_Human_0009|NegCtrl	NegCtrl	ACCGGATCCATGTAATGCGTTCGAGTTTAAGAGCTATGCTGGAAACAGCATAGCAAGTTTAAATAAGGCTAGTCCGTTATCAACTTGAAAAAGTGGCACCGAGTCGGTGCTTTTTT
1|Neg_Control_Human_0010|NegCtrl	GTCGTGAAGTGCATTCGATC	0	0	1362	1394	3504	917	821	803	0	0	1590	711	2	1702	1027	932	4644	n/a	NegCtrl	NegCtrl|01	1|Neg_Control_Human_0010|NegCtrl	NegCtrl	ACCGGTCGTGAAGTGCATTCGATCGTTTAAGAGCTATGCTGGAAACAGCATAGCAAGTTTAAATAAGGCTAGTCCGTTATCAACTTGAAAAAGTGGCACCGAGTCGGTGCTTTTTT
1|Neg_Control_Human_0011|NegCtrl	GTTCGACTCGCGTGACCGTA	6139	2539	2013	1443	1065	1145	1986	1581	0	0	2513	780	0	2642	1887	2079	5186	n/a	NegCtrl	NegCtrl|02	1|Neg_Control_Human_0011|NegCtrl	NegCtrl	ACCGGTTCGACTCGCGTGACCGTAGTTTAAGAGCTATGCTGGAAACAGCATAGCAAGTTTAAATAAGGCTAGTCCGTTATCAACTTGAAAAAGTGGCACCGAGTCGGTGCTTTTTT
1|Neg_Control_Human_0012|NegCtrl	GAATCTACCGCAGCGGTTCG	7239	954	1051	1134	1458	362	802	776	0	1	2110	875	2438	3	816	1896	2467	n/a	NegCtrl	NegCtrl|02	1|Neg_Control_Human_0012|NegCtrl	NegCtrl	ACCGGAATCTACCGCAGCGGTTCGGTTTAAGAGCTATGCTGGAAACAGCATAGCAAGTTTAAATAAGGCTAGTCCGTTATCAACTTGAAAAAGTGGCACCGAGTCGGTGCTTTTTT
1|Neg_Control_Human_0013|NegCtrl	GAAGTGACGTCGATTCGATA	1	2154	895	907	1	500	778	431	0	1962	1023	612	0	0	1418	1253	2829	n/a	NegCtrl	NegCtrl|02	1|Neg_Control_Human_0013|NegCtrl	NegCtrl	ACCGGAAGTGACGTCGATTCGATAGTTTAAGAGCTATGCTGGAAACAGCATAGCAAGTTTAAATAAGGCTAGTCCGTTATCAACTTGAAAAAGTGGCACCGAGTCGGTGCTTTTTT
1|Neg_Control_Human_0014|NegCtrl	GCGGTGTATGACAACCGCCG	0	0	104	87	1	0	84	167	0	0	383	176	0	0	102	8	312	n/a	NegCtrl	NegCtrl|02	1|Neg_Control_Human_0014|NegCtrl	NegCtrl	ACCGGCGGTGTATGACAACCGCCGGTTTAAGAGCTATGCTGGAAACAGCATAGCAAGTTTAAATAAGGCTAGTCCGTTATCAACTTGAAAAAGTGGCACCGAGTCGGTGCTTTTTT
1|Neg_Control_Human_0015|NegCtrl	GTACCGCGCCTGAAGTTCGC	2371	2604	1699	1614	1131	1449	1038	1035	1	3304	1153	1182	2388	1727	1447	2687	3927	n/a	NegCtrl	NegCtrl|02	1|Neg_Control_Human_0015|NegCtrl	NegCtrl	ACCGGTACCGCGCCTGAAGTTCGCGTTTAAGAGCTATGCTGGAAACAGCATAGCAAGTTTAAATAAGGCTAGTCCGTTATCAACTTGAAAAAGTGGCACCGAGTCGGTGCTTTTTT
1|Neg_Control_Human_0016|NegCtrl	GCAGCTCGTGTGTCGTACTC	1	416	955	1136	2	535	1474	843	0	3113	1187	592	2	3166	1165	2060	3328	n/a	NegCtrl	NegCtrl|02	1|Neg_Control_Human_0016|NegCtrl	NegCtrl	ACCGGCAGCTCGTGTGTCGTACTCGTTTAAGAGCTATGCTGGAAACAGCATAGCAAGTTTAAATAAGGCTAGTCCGTTATCAACTTGAAAAAGTGGCACCGAGTCGGTGCTTTTTT
1|Neg_Control_Human_0017|NegCtrl	GCGCCTTAAGAGTACTCATC	1	1037	535	645	0	0	243	358	0	0	635	316	0	0	1071	1040	1738	n/a	NegCtrl	NegCtrl|02	1|Neg_Control_Human_0017|NegCtrl	NegCtrl	ACCGGCGCCTTAAGAGTACTCATCGTTTAAGAGCTATGCTGGAAACAGCATAGCAAGTTTAAATAAGGCTAGTCCGTTATCAACTTGAAAAAGTGGCACCGAGTCGGTGCTTTTTT
1|Neg_Control_Human_0018|NegCtrl	GAGTGTCGTCGTTGCTCCTA	0	2940	2322	1863	1424	1108	1748	1460	0	3010	1746	1005	645	0	1106	1110	5813	n/a	NegCtrl	NegCtrl|02	1|Neg_Control_Human_0018|NegCtrl	NegCtrl	ACCGGAGTGTCGTCGTTGCTCCTAGTTTAAGAGCTATGCTGGAAACAGCATAGCAAGTTTAAATAAGGCTAGTCCGTTATCAACTTGAAAAAGTGGCACCGAGTCGGTGCTTTTTT
1|Neg_Control_Human_0019|NegCtrl	GCAGCTCGACCTCAAGCCGT	0	33	1179	1228	2	1215	376	935	1	2166	1483	470	0	2727	1112	821	2197	n/a	NegCtrl	NegCtrl|02	1|Neg_Control_Human_0019|NegCtrl	NegCtrl	ACCGGCAGCTCGACCTCAAGCCGTGTTTAAGAGCTATGCTGGAAACAGCATAGCAAGTTTAAATAAGGCTAGTCCGTTATCAACTTGAAAAAGTGGCACCGAGTCGGTGCTTTTTT
1|Neg_Control_Human_0020|NegCtrl	GTATCCTGACCTACGCGCTG	2916	1676	733	754	0	464	1348	496	0	0	1271	622	1	94	1730	1017	2514	n/a	NegCtrl	NegCtrl|02	1|Neg_Control_Human_0020|NegCtrl	NegCtrl	ACCGGTATCCTGACCTACGCGCTGGTTTAAGAGCTATGCTGGAAACAGCATAGCAAGTTTAAATAAGGCTAGTCCGTTATCAACTTGAAAAAGTGGCACCGAGTCGGTGCTTTTTT
1|Neg_Control_Human_0021|NegCtrl	GTGTATCTCAGCACGCTAAC	0	1	1055	586	0	114	259	451	0	0	1260	453	2508	2	791	1922	2712	n/a	NegCtrl	NegCtrl|03	1|Neg_Control_Human_0021|NegCtrl	NegCtrl	ACCGGTGTATCTCAGCACGCTAACGTTTAAGAGCTATGCTGGAAACAGCATAGCAAGTTTAAATAAGGCTAGTCCGTTATCAACTTGAAAAAGTGGCACCGAGTCGGTGCTTTTTT
1|Neg_Control_Human_0022|NegCtrl	GTCGTCATACAACGGCAACG	3354	1	865	452	2	874	393	846	0	0	546	580	0	3399	434	1033	1885	n/a	NegCtrl	NegCtrl|03	1|Neg_Control_Human_0022|NegCtrl	NegCtrl	ACCGGTCGTCATACAACGGCAACGGTTTAAGAGCTATGCTGGAAACAGCATAGCAAGTTTAAATAAGGCTAGTCCGTTATCAACTTGAAAAAGTGGCACCGAGTCGGTGCTTTTTT
1|Neg_Control_Human_0023|NegCtrl	GTCGTGCGCTTCCGGCGGTA	2018	2843	885	1115	1953	361	945	946	0	1677	892	714	1620	2175	594	671	2281	n/a	NegCtrl	NegCtrl|03	1|Neg_Control_Human_0023|NegCtrl	NegCtrl	ACCGGTCGTGCGCTTCCGGCGGTAGTTTAAGAGCTATGCTGGAAACAGCATAGCAAGTTTAAATAAGGCTAGTCCGTTATCAACTTGAAAAAGTGGCACCGAGTCGGTGCTTTTTT
1|Neg_Control_Human_0024|NegCtrl	GCGGTCCTCAGTAAGCGCGT	1	973	1258	1218	2321	821	351	748	0	0	1445	1621	1	2966	1152	1404	3675	n/a	NegCtrl	NegCtrl|03	1|Neg_Control_Human_0024|NegCtrl	NegCtrl	ACCGGCGGTCCTCAGTAAGCGCGTGTTTAAGAGCTATGCTGGAAACAGCATAGCAAGTTTAAATAAGGCTAGTCCGTTATCAACTTGAAAAAGTGGCACCGAGTCGGTGCTTTTTT
1|Neg_Control_Human_0025|NegCtrl	GCTCTGCTGCGGAAGGATTC	1793	774	2128	1674	623	2196	1524	1582	0	0	1865	1007	1	1804	1470	2431	4466	n/a	NegCtrl	NegCtrl|03	1|Neg_Control_Human_0025|NegCtrl	NegCtrl	ACCGGCTCTGCTGCGGAAGGATTCGTTTAAGAGCTATGCTGGAAACAGCATAGCAAGTTTAAATAAGGCTAGTCCGTTATCAACTTGAAAAAGTGGCACCGAGTCGGTGCTTTTTT
1|Neg_Control_Human_0026|NegCtrl	GCATGGAGGAGCGTCGCAGA	1854	1332	2066	1401	2	0	1408	1278	0	2983	2349	1374	4	0	1816	1787	4009	n/a	NegCtrl	NegCtrl|03	1|Neg_Control_Human_0026|NegCtrl	NegCtrl	ACCGGCATGGAGGAGCGTCGCAGAGTTTAAGAGCTATGCTGGAAACAGCATAGCAAGTTTAAATAAGGCTAGTCCGTTATCAACTTGAAAAAGTGGCACCGAGTCGGTGCTTTTTT
1|Neg_Control_Human_0027|NegCtrl	GTAGCGCGCGTAGGAGTGGC	2346	101	698	876	1026	4	826	622	1	2869	821	545	2702	2	1052	2527	3152	n/a	NegCtrl	NegCtrl|03	1|Neg_Control_Human_0027|NegCtrl	NegCtrl	ACCGGTAGCGCGCGTAGGAGTGGCGTTTAAGAGCTATGCTGGAAACAGCATAGCAAGTTTAAATAAGGCTAGTCCGTTATCAACTTGAAAAAGTGGCACCGAGTCGGTGCTTTTTT
1|Neg_Control_Human_0028|NegCtrl	GATCACCTGCATTCGTACAC	0	2671	476	481	989	0	846	618	0	0	749	530	0	0	774	1131	2292	n/a	NegCtrl	NegCtrl|03	1|Neg_Control_Human_0028|NegCtrl	NegCtrl	ACCGGATCACCTGCATTCGTACACGTTTAAGAGCTATGCTGGAAACAGCATAGCAAGTTTAAATAAGGCTAGTCCGTTATCAACTTGAAAAAGTGGCACCGAGTCGGTGCTTTTTT
1|Neg_Control_Human_0029|NegCtrl	GCACACCTAGATATCGAATG	4345	786	1651	1461	2415	1689	1889	1319	0	0	2669	1366	1325	2	2161	2194	3389	n/a	NegCtrl	NegCtrl|03	1|Neg_Control_Human_0029|NegCtrl	NegCtrl	ACCGGCACACCTAGATATCGAATGGTTTAAGAGCTATGCTGGAAACAGCATAGCAAGTTTAAATAAGGCTAGTCCGTTATCAACTTGAAAAAGTGGCACCGAGTCGGTGCTTTTTT
1|Neg_Control_Human_0030|NegCtrl	GTTGATCAACGCGCTTCGCG	5403	1840	2311	1728	4	506	635	1071	1	2705	3414	1375	4394	2	1167	2072	4776	n/a	NegCtrl	NegCtrl|03	1|Neg_Control_Human_0030|NegCtrl	NegCtrl	ACCGGTTGATCAACGCGCTTCGCGGTTTAAGAGCTATGCTGGAAACAGCATAGCAAGTTTAAATAAGGCTAGTCCGTTATCAACTTGAAAAAGTGGCACCGAGTCGGTGCTTTTTT
1|Neg_Control_Human_0031|NegCtrl	GCGTCTCACTCACTCCATCG	0	518	1009	653	1384	590	844	631	0	0	969	527	2588	1399	1017	1162	2575	n/a	NegCtrl	NegCtrl|04	1|Neg_Control_Human_0031|NegCtrl	NegCtrl	ACCGGCGTCTCACTCACTCCATCGGTTTAAGAGCTATGCTGGAAACAGCATAGCAAGTTTAAATAAGGCTAGTCCGTTATCAACTTGAAAAAGTGGCACCGAGTCGGTGCTTTTTT
1|Neg_Control_Human_0032|NegCtrl	GCCGACCAACGTCAGCGGTA	1828	1883	855	618	1	850	1054	673	0	0	1185	903	0	1665	1162	729	2265	n/a	NegCtrl	NegCtrl|04	1|Neg_Control_Human_0032|NegCtrl	NegCtrl	ACCGGCCGACCAACGTCAGCGGTAGTTTAAGAGCTATGCTGGAAACAGCATAGCAAGTTTAAATAAGGCTAGTCCGTTATCAACTTGAAAAAGTGGCACCGAGTCGGTGCTTTTTT
1|Neg_Control_Human_0033|NegCtrl	GGATACGGTGCGTCAATCTA	7368	1962	1779	1360	3373	1017	1485	1546	17754	1	1532	1067	1	3486	1993	2574	4114	n/a	NegCtrl	NegCtrl|04	1|Neg_Control_Human_0033|NegCtrl	NegCtrl	ACCGGGATACGGTGCGTCAATCTAGTTTAAGAGCTATGCTGGAAACAGCATAGCAAGTTTAAATAAGGCTAGTCCGTTATCAACTTGAAAAAGTGGCACCGAGTCGGTGCTTTTTT
1|Neg_Control_Human_0034|NegCtrl	GAATCCAGTGGCGGCGACAA	5	704	1208	1135	1	0	604	1144	0	1542	1437	535	40	0	1787	2222	2710	n/a	NegCtrl	NegCtrl|04	1|Neg_Control_Human_0034|NegCtrl	NegCtrl	ACCGGAATCCAGTGGCGGCGACAAGTTTAAGAGCTATGCTGGAAACAGCATAGCAAGTTTAAATAAGGCTAGTCCGTTATCAACTTGAAAAAGTGGCACCGAGTCGGTGCTTTTTT
1|Neg_Control_Human_0035|NegCtrl	GCACTGTCAGTGCAACGATA	0	1506	916	1201	11	374	1164	975	0	1	2037	733	5560	3	1400	1208	3210	n/a	NegCtrl	NegCtrl|04	1|Neg_Control_Human_0035|NegCtrl	NegCtrl	ACCGGCACTGTCAGTGCAACGATAGTTTAAGAGCTATGCTGGAAACAGCATAGCAAGTTTAAATAAGGCTAGTCCGTTATCAACTTGAAAAAGTGGCACCGAGTCGGTGCTTTTTT
1|Neg_Control_Human_0036|NegCtrl	GCGATCCTCAAGTATGCTCA	0	1747	2061	2186	1025	1727	1344	1661	0	3543	2851	1477	3460	1249	3372	3637	5294	n/a	NegCtrl	NegCtrl|04	1|Neg_Control_Human_0036|NegCtrl	NegCtrl	ACCGGCGATCCTCAAGTATGCTCAGTTTAAGAGCTATGCTGGAAACAGCATAGCAAGTTTAAATAAGGCTAGTCCGTTATCAACTTGAAAAAGTGGCACCGAGTCGGTGCTTTTTT
1|Neg_Control_Human_0037|NegCtrl	GCTAATATCGACACGGCCGC	0	0	1498	1271	907	403	430	626	1	4633	965	562	2115	2853	1386	1521	3001	n/a	NegCtrl	NegCtrl|04	1|Neg_Control_Human_0037|NegCtrl	NegCtrl	ACCGGCTAATATCGACACGGCCGCGTTTAAGAGCTATGCTGGAAACAGCATAGCAAGTTTAAATAAGGCTAGTCCGTTATCAACTTGAAAAAGTGGCACCGAGTCGGTGCTTTTTT
1|Neg_Control_Human_0038|NegCtrl	GGAGATGCATCGAAGTCGAT	0	0	1120	928	1	3	330	732	0	0	1855	1464	1	1061	1319	1855	3249	n/a	NegCtrl	NegCtrl|04	1|Neg_Control_Human_0038|NegCtrl	NegCtrl	ACCGGGAGATGCATCGAAGTCGATGTTTAAGAGCTATGCTGGAAACAGCATAGCAAGTTTAAATAAGGCTAGTCCGTTATCAACTTGAAAAAGTGGCACCGAGTCGGTGCTTTTTT
1|Neg_Control_Human_0039|NegCtrl	GGATGCACTCCATCTCGTCT	0	1855	1772	1368	1	691	782	647	0	0	1547	1050	2	2331	1695	1775	3750	n/a	NegCtrl	NegCtrl|04	1|Neg_Control_Human_0039|NegCtrl	NegCtrl	ACCGGGATGCACTCCATCTCGTCTGTTTAAGAGCTATGCTGGAAACAGCATAGCAAGTTTAAATAAGGCTAGTCCGTTATCAACTTGAAAAAGTGGCACCGAGTCGGTGCTTTTTT
1|Neg_Control_Human_0040|NegCtrl	GTGCCGAGTAATAACGCGAG	0	1792	1796	1235	0	128	646	937	1	6979	2807	1239	338	5729	1706	1257	3263	n/a	NegCtrl	NegCtrl|04	1|Neg_Control_Human_0040|NegCtrl	NegCtrl	ACCGGTGCCGAGTAATAACGCGAGGTTTAAGAGCTATGCTGGAAACAGCATAGCAAGTTTAAATAAGGCTAGTCCGTTATCAACTTGAAAAAGTGGCACCGAGTCGGTGCTTTTTT
1|Neg_Control_Human_0041|NegCtrl	GAGATTCCGATGTAACGTAC	0	1150	1275	1296	1	365	820	923	0	0	1396	715	1	1617	836	1366	4077	n/a	NegCtrl	NegCtrl|05	1|Neg_Control_Human_0041|NegCtrl	NegCtrl	ACCGGAGATTCCGATGTAACGTACGTTTAAGAGCTATGCTGGAAACAGCATAGCAAGTTTAAATAAGGCTAGTCCGTTATCAACTTGAAAAAGTGGCACCGAGTCGGTGCTTTTTT
1|Neg_Control_Human_0042|NegCtrl	GTCGTCACGAGCAGGATTGC	0	1357	1902	1527	202	303	403	1452	0	0	1451	963	3306	1975	2255	2193	5222	n/a	NegCtrl	NegCtrl|05	1|Neg_Control_Human_0042|NegCtrl	NegCtrl	ACCGGTCGTCACGAGCAGGATTGCGTTTAAGAGCTATGCTGGAAACAGCATAGCAAGTTTAAATAAGGCTAGTCCGTTATCAACTTGAAAAAGTGGCACCGAGTCGGTGCTTTTTT
1|Neg_Control_Human_0043|NegCtrl	GCGTTAGTCACTTAGCTCGA	8389	0	1168	664	0	458	917	716	0	0	1298	465	1	0	1195	1662	2268	n/a	NegCtrl	NegCtrl|05	1|Neg_Control_Human_0043|NegCtrl	NegCtrl	ACCGGCGTTAGTCACTTAGCTCGAGTTTAAGAGCTATGCTGGAAACAGCATAGCAAGTTTAAATAAGGCTAGTCCGTTATCAACTTGAAAAAGTGGCACCGAGTCGGTGCTTTTTT
1|Neg_Control_Human_0044|NegCtrl	GTTCACACGGTGTCGGATAG	1412	938	1155	737	0	709	925	738	0	1705	897	996	1	1959	944	1933	2510	n/a	NegCtrl	NegCtrl|05	1|Neg_Control_Human_0044|NegCtrl	NegCtrl	ACCGGTTCACACGGTGTCGGATAGGTTTAAGAGCTATGCTGGAAACAGCATAGCAAGTTTAAATAAGGCTAGTCCGTTATCAACTTGAAAAAGTGGCACCGAGTCGGTGCTTTTTT
1|Neg_Control_Human_0045|NegCtrl	GGATAGGTGACCTTAGTACG	12	453	1795	1520	1	688	546	770	1	9718	1752	823	11379	2035	3105	1503	4275	n/a	NegCtrl	NegCtrl|05	1|Neg_Control_Human_0045|NegCtrl	NegCtrl	ACCGGGATAGGTGACCTTAGTACGGTTTAAGAGCTATGCTGGAAACAGCATAGCAAGTTTAAATAAGGCTAGTCCGTTATCAACTTGAAAAAGTGGCACCGAGTCGGTGCTTTTTT
1|Neg_Control_Human_0046|NegCtrl	GTATGAGTCAAGCTAATGCG	0	1395	885	603	3049	497	659	543	0	2009	1173	609	1	6470	1248	1144	2653	n/a	NegCtrl	NegCtrl|05	1|Neg_Control_Human_0046|NegCtrl	NegCtrl	ACCGGTATGAGTCAAGCTAATGCGGTTTAAGAGCTATGCTGGAAACAGCATAGCAAGTTTAAATAAGGCTAGTCCGTTATCAACTTGAAAAAGTGGCACCGAGTCGGTGCTTTTTT
1|Neg_Control_Human_0047|NegCtrl	GCAACTATTGGAATACGTGA	0	576	774	786	0	205	242	547	0	0	856	811	9759	11	817	1206	2192	n/a	NegCtrl	NegCtrl|05	1|Neg_Control_Human_0047|NegCtrl	NegCtrl	ACCGGCAACTATTGGAATACGTGAGTTTAAGAGCTATGCTGGAAACAGCATAGCAAGTTTAAATAAGGCTAGTCCGTTATCAACTTGAAAAAGTGGCACCGAGTCGGTGCTTTTTT
1|Neg_Control_Human_0048|NegCtrl	GTTACCTTCGCTCGTCTATA	0	0	1105	695	3	579	604	652	12134	1	713	289	1	0	601	935	2115	n/a	NegCtrl	NegCtrl|05	1|Neg_Control_Human_0048|NegCtrl	NegCtrl	ACCGGTTACCTTCGCTCGTCTATAGTTTAAGAGCTATGCTGGAAACAGCATAGCAAGTTTAAATAAGGCTAGTCCGTTATCAACTTGAAAAAGTGGCACCGAGTCGGTGCTTTTTT
1|Neg_Control_Human_0049|NegCtrl	GTACCGAGCACCACAGGCCG	105	1262	3109	2341	2644	1506	2235	2186	1	2058	4056	2512	581	5403	3469	5021	7265	n/a	NegCtrl	NegCtrl|05	1|Neg_Control_Human_0049|NegCtrl	NegCtrl	ACCGGTACCGAGCACCACAGGCCGGTTTAAGAGCTATGCTGGAAACAGCATAGCAAGTTTAAATAAGGCTAGTCCGTTATCAACTTGAAAAAGTGGCACCGAGTCGGTGCTTTTTT
1|Neg_Control_Human_0050|NegCtrl	GTCAGCCATCGGATAGAGAT	1	2147	956	866	2	362	367	442	0	222	949	546	1	2063	720	904	2275	n/a	NegCtrl	NegCtrl|05	1|Neg_Control_Human_0050|NegCtrl	NegCtrl	ACCGGTCAGCCATCGGATAGAGATGTTTAAGAGCTATGCTGGAAACAGCATAGCAAGTTTAAATAAGGCTAGTCCGTTATCAACTTGAAAAAGTGGCACCGAGTCGGTGCTTTTTT
1|Neg_Control_Human_0051|NegCtrl	GTACGGCACTCCTAGCCGCT	0	1876	1560	918	1543	366	660	993	0	1992	1457	876	2704	2	1325	1749	3312	n/a	NegCtrl	NegCtrl|06	1|Neg_Control_Human_0051|NegCtrl	NegCtrl	ACCGGTACGGCACTCCTAGCCGCTGTTTAAGAGCTATGCTGGAAACAGCATAGCAAGTTTAAATAAGGCTAGTCCGTTATCAACTTGAAAAAGTGGCACCGAGTCGGTGCTTTTTT
1|Neg_Control_Human_0052|NegCtrl	GGTCCTGTCGTATGCTTGCA	3259	2095	1194	1386	4	181	1088	1073	14757	0	667	562	1	0	1561	2002	3011	n/a	NegCtrl	NegCtrl|06	1|Neg_Control_Human_0052|NegCtrl	NegCtrl	ACCGGGTCCTGTCGTATGCTTGCAGTTTAAGAGCTATGCTGGAAACAGCATAGCAAGTTTAAATAAGGCTAGTCCGTTATCAACTTGAAAAAGTGGCACCGAGTCGGTGCTTTTTT
1|Neg_Control_Human_0053|NegCtrl	GCCGCAATATATGCGGTAAG	1	751	983	541	1	929	473	764	0	3012	2070	709	0	0	801	1288	3048	n/a	NegCtrl	NegCtrl|06	1|Neg_Control_Human_0053|NegCtrl	NegCtrl	ACCGGCCGCAATATATGCGGTAAGGTTTAAGAGCTATGCTGGAAACAGCATAGCAAGTTTAAATAAGGCTAGTCCGTTATCAACTTGAAAAAGTGGCACCGAGTCGGTGCTTTTTT
1|Neg_Control_Human_0054|NegCtrl	GCGCACGTATAATCCTGCGT	3946	3821	727	1223	0	459	597	628	0	0	1619	585	2	2419	969	2094	2680	n/a	NegCtrl	NegCtrl|06	1|Neg_Control_Human_0054|NegCtrl	NegCtrl	ACCGGCGCACGTATAATCCTGCGTGTTTAAGAGCTATGCTGGAAACAGCATAGCAAGTTTAAATAAGGCTAGTCCGTTATCAACTTGAAAAAGTGGCACCGAGTCGGTGCTTTTTT
1|Neg_Control_Human_0055|NegCtrl	GTGCACAACACGATCCACGA	3287	589	1536	1362	1	442	682	1379	0	2904	1845	1159	0	0	1285	1547	3025	n/a	NegCtrl	NegCtrl|06	1|Neg_Control_Human_0055|NegCtrl	NegCtrl	ACCGGTGCACAACACGATCCACGAGTTTAAGAGCTATGCTGGAAACAGCATAGCAAGTTTAAATAAGGCTAGTCCGTTATCAACTTGAAAAAGTGGCACCGAGTCGGTGCTTTTTT
1|Neg_Control_Human_0056|NegCtrl	GCACAATGTTGACGTAAGTG	0	577	1494	1021	2	222	953	1036	0	0	1290	274	0	1156	677	2004	2979	n/a	NegCtrl	NegCtrl|06	1|Neg_Control_Human_0056|NegCtrl	NegCtrl	ACCGGCACAATGTTGACGTAAGTGGTTTAAGAGCTATGCTGGAAACAGCATAGCAAGTTTAAATAAGGCTAGTCCGTTATCAACTTGAAAAAGTGGCACCGAGTCGGTGCTTTTTT
1|Neg_Control_Human_0057|NegCtrl	GTAAGATGCTGCTCACCGTG	1	2159	1622	1217	2617	1025	352	1119	0	1057	1493	483	2381	2	1091	1258	3790	n/a	NegCtrl	NegCtrl|06	1|Neg_Control_Human_0057|NegCtrl	NegCtrl	ACCGGTAAGATGCTGCTCACCGTGGTTTAAGAGCTATGCTGGAAACAGCATAGCAAGTTTAAATAAGGCTAGTCCGTTATCAACTTGAAAAAGTGGCACCGAGTCGGTGCTTTTTT
1|Neg_Control_Human_0058|NegCtrl	GTCGGTGATCCAACGTATCG	0	1280	1411	1468	1	1060	231	1420	0	6653	1851	1107	1050	3021	1824	3619	4685	n/a	NegCtrl	NegCtrl|06	1|Neg_Control_Human_0058|NegCtrl	NegCtrl	ACCGGTCGGTGATCCAACGTATCGGTTTAAGAGCTATGCTGGAAACAGCATAGCAAGTTTAAATAAGGCTAGTCCGTTATCAACTTGAAAAAGTGGCACCGAGTCGGTGCTTTTTT
1|Neg_Control_Human_0059|NegCtrl	GAGCTAGTAGGACGCAAGAC	0	38	647	476	1244	251	836	758	0	0	960	384	0	0	554	614	2506	n/a	NegCtrl	NegCtrl|06	1|Neg_Control_Human_0059|NegCtrl	NegCtrl	ACCGGAGCTAGTAGGACGCAAGACGTTTAAGAGCTATGCTGGAAACAGCATAGCAAGTTTAAATAAGGCTAGTCCGTTATCAACTTGAAAAAGTGGCACCGAGTCGGTGCTTTTTT
1|Neg_Control_Human_0060|NegCtrl	GTACGTGGAAGCTTGTGGCC	0	428	1850	1488	1654	821	934	1009	0	0	979	593	1780	1	1514	1693	3055	n/a	NegCtrl	NegCtrl|06	1|Neg_Control_Human_0060|NegCtrl	NegCtrl	ACCGGTACGTGGAAGCTTGTGGCCGTTTAAGAGCTATGCTGGAAACAGCATAGCAAGTTTAAATAAGGCTAGTCCGTTATCAACTTGAAAAAGTGGCACCGAGTCGGTGCTTTTTT
1|Neg_Control_Human_0061|NegCtrl	GAGAACTGCCAGTTCTCGAT	1540	1	923	645	0	0	562	448	0	0	727	527	0	0	735	424	2223	n/a	NegCtrl	NegCtrl|07	1|Neg_Control_Human_0061|NegCtrl	NegCtrl	ACCGGAGAACTGCCAGTTCTCGATGTTTAAGAGCTATGCTGGAAACAGCATAGCAAGTTTAAATAAGGCTAGTCCGTTATCAACTTGAAAAAGTGGCACCGAGTCGGTGCTTTTTT
1|Neg_Control_Human_0062|NegCtrl	GCCATTCGGCGCGGCACTTC	2	0	533	1029	0	0	306	342	13575	2622	469	283	1956	1	1074	2172	1991	n/a	NegCtrl	NegCtrl|07	1|Neg_Control_Human_0062|NegCtrl	NegCtrl	ACCGGCCATTCGGCGCGGCACTTCGTTTAAGAGCTATGCTGGAAACAGCATAGCAAGTTTAAATAAGGCTAGTCCGTTATCAACTTGAAAAAGTGGCACCGAGTCGGTGCTTTTTT
1|Neg_Control_Human_0063|NegCtrl	GCACACGACCAATCCGCTTC	1	1620	1107	1250	1	0	572	784	0	2308	2193	773	4826	4108	1132	2311	2750	n/a	NegCtrl	NegCtrl|07	1|Neg_Control_Human_0063|NegCtrl	NegCtrl	ACCGGCACACGACCAATCCGCTTCGTTTAAGAGCTATGCTGGAAACAGCATAGCAAGTTTAAATAAGGCTAGTCCGTTATCAACTTGAAAAAGTGGCACCGAGTCGGTGCTTTTTT
1|Neg_Control_Human_0064|NegCtrl	GAGGTGATCGATTAAGTACA	1600	489	1348	1106	2	685	1679	1056	0	0	2254	933	6504	7	1771	1524	4295	n/a	NegCtrl	NegCtrl|07	1|Neg_Control_Human_0064|NegCtrl	NegCtrl	ACCGGAGGTGATCGATTAAGTACAGTTTAAGAGCTATGCTGGAAACAGCATAGCAAGTTTAAATAAGGCTAGTCCGTTATCAACTTGAAAAAGTGGCACCGAGTCGGTGCTTTTTT
1|Neg_Control_Human_0065|NegCtrl	GTCACTCGCAGACGCCTAAC	0	1657	1966	1415	1927	1812	850	1143	0	5522	1707	705	2028	2707	2054	2237	4183	n/a	NegCtrl	NegCtrl|07	1|Neg_Control_Human_0065|NegCtrl	NegCtrl	ACCGGTCACTCGCAGACGCCTAACGTTTAAGAGCTATGCTGGAAACAGCATAGCAAGTTTAAATAAGGCTAGTCCGTTATCAACTTGAAAAAGTGGCACCGAGTCGGTGCTTTTTT
1|Neg_Control_Human_0066|NegCtrl	GCGCTACGGAATCATACGTT	0	0	1196	954	2	520	885	627	4405	1	993	623	0	1992	663	582	2583	n/a	NegCtrl	NegCtrl|07	1|Neg_Control_Human_0066|NegCtrl	NegCtrl	ACCGGCGCTACGGAATCATACGTTGTTTAAGAGCTATGCTGGAAACAGCATAGCAAGTTTAAATAAGGCTAGTCCGTTATCAACTTGAAAAAGTGGCACCGAGTCGGTGCTTTTTT
1|Neg_Control_Human_0067|NegCtrl	GGTAGGACCTCACGGCGCGC	1	1724	1021	1379	1	0	163	1002	0	0	1721	780	0	0	1322	2813	3446	n/a	NegCtrl	NegCtrl|07	1|Neg_Control_Human_0067|NegCtrl	NegCtrl	ACCGGGTAGGACCTCACGGCGCGCGTTTAAGAGCTATGCTGGAAACAGCATAGCAAGTTTAAATAAGGCTAGTCCGTTATCAACTTGAAAAAGTGGCACCGAGTCGGTGCTTTTTT
1|Neg_Control_Human_0068|NegCtrl	GAACTGCATCTTGTTGTAGT	0	4011	1431	935	0	677	638	695	0	1	1711	960	0	4133	918	1668	2722	n/a	NegCtrl	NegCtrl|07	1|Neg_Control_Human_0068|NegCtrl	NegCtrl	ACCGGAACTGCATCTTGTTGTAGTGTTTAAGAGCTATGCTGGAAACAGCATAGCAAGTTTAAATAAGGCTAGTCCGTTATCAACTTGAAAAAGTGGCACCGAGTCGGTGCTTTTTT
1|Neg_Control_Human_0069|NegCtrl	GATCCTGATCCGGCGGCGCG	3868	1323	1179	1162	2	683	1012	1057	1	494	1760	888	0	0	1826	2131	3860	n/a	NegCtrl	NegCtrl|07	1|Neg_Control_Human_0069|NegCtrl	NegCtrl	ACCGGATCCTGATCCGGCGGCGCGGTTTAAGAGCTATGCTGGAAACAGCATAGCAAGTTTAAATAAGGCTAGTCCGTTATCAACTTGAAAAAGTGGCACCGAGTCGGTGCTTTTTT
1|Neg_Control_Human_0070|NegCtrl	GGTATGCGCGATCCTGAGTT	0	1090	1178	1069	0	996	580	582	1	2616	1273	632	2	5107	1042	1847	2800	n/a	NegCtrl	NegCtrl|07	1|Neg_Control_Human_0070|NegCtrl	NegCtrl	ACCGGGTATGCGCGATCCTGAGTTGTTTAAGAGCTATGCTGGAAACAGCATAGCAAGTTTAAATAAGGCTAGTCCGTTATCAACTTGAAAAAGTGGCACCGAGTCGGTGCTTTTTT
1|Neg_Control_Human_0071|NegCtrl	GCGGAGCTAGAGAGCGGTCA	2187	780	828	885	1	1	733	638	0	0	1501	404	0	0	1066	1209	2299	n/a	NegCtrl	NegCtrl|08	1|Neg_Control_Human_0071|NegCtrl	NegCtrl	ACCGGCGGAGCTAGAGAGCGGTCAGTTTAAGAGCTATGCTGGAAACAGCATAGCAAGTTTAAATAAGGCTAGTCCGTTATCAACTTGAAAAAGTGGCACCGAGTCGGTGCTTTTTT
1|Neg_Control_Human_0072|NegCtrl	GAATGGCAATTACGGCTGAT	0	1185	1039	1293	1971	159	1176	633	0	0	992	601	5404	1200	1351	1043	2429	n/a	NegCtrl	NegCtrl|08	1|Neg_Control_Human_0072|NegCtrl	NegCtrl	ACCGGAATGGCAATTACGGCTGATGTTTAAGAGCTATGCTGGAAACAGCATAGCAAGTTTAAATAAGGCTAGTCCGTTATCAACTTGAAAAAGTGGCACCGAGTCGGTGCTTTTTT
1|Neg_Control_Human_0073|NegCtrl	GTATGGTGAGTAGTCGCTTG	1734	1704	1074	798	0	0	517	585	0	1747	1614	379	1	2641	646	1133	2575	n/a	NegCtrl	NegCtrl|08	1|Neg_Control_Human_0073|NegCtrl	NegCtrl	ACCGGTATGGTGAGTAGTCGCTTGGTTTAAGAGCTATGCTGGAAACAGCATAGCAAGTTTAAATAAGGCTAGTCCGTTATCAACTTGAAAAAGTGGCACCGAGTCGGTGCTTTTTT
1|Neg_Control_Human_0074|NegCtrl	GTGTAATTGCGTCTAGTCGG	0	1574	1708	1576	1739	814	947	958	18117	2	1874	992	4687	1308	1028	2146	4221	n/a	NegCtrl	NegCtrl|08	1|Neg_Control_Human_0074|NegCtrl	NegCtrl	ACCGGTGTAATTGCGTCTAGTCGGGTTTAAGAGCTATGCTGGAAACAGCATAGCAAGTTTAAATAAGGCTAGTCCGTTATCAACTTGAAAAAGTGGCACCGAGTCGGTGCTTTTTT
1|Neg_Control_Human_0075|NegCtrl	GGTCCTGGCGAGGAGCCTTG	0	1	828	865	2	688	528	665	0	1544	964	346	0	2306	649	472	1995	n/a	NegCtrl	NegCtrl|08	1|Neg_Control_Human_0075|NegCtrl	NegCtrl	ACCGGGTCCTGGCGAGGAGCCTTGGTTTAAGAGCTATGCTGGAAACAGCATAGCAAGTTTAAATAAGGCTAGTCCGTTATCAACTTGAAAAAGTGGCACCGAGTCGGTGCTTTTTT
1|Neg_Control_Human_0076|NegCtrl	GAAGATAAGTCGCTGTCTCG	0	0	973	768	2014	352	1505	824	0	0	1229	424	2422	1	1739	1604	2752	n/a	NegCtrl	NegCtrl|08	1|Neg_Control_Human_0076|NegCtrl	NegCtrl	ACCGGAAGATAAGTCGCTGTCTCGGTTTAAGAGCTATGCTGGAAACAGCATAGCAAGTTTAAATAAGGCTAGTCCGTTATCAACTTGAAAAAGTGGCACCGAGTCGGTGCTTTTTT
1|Neg_Control_Human_0077|NegCtrl	GTCGGCGTTCTGTTGTGACT	3137	993	721	968	1	558	1003	405	3292	2411	555	636	1823	1308	804	824	2566	n/a	NegCtrl	NegCtrl|08	1|Neg_Control_Human_0077|NegCtrl	NegCtrl	ACCGGTCGGCGTTCTGTTGTGACTGTTTAAGAGCTATGCTGGAAACAGCATAGCAAGTTTAAATAAGGCTAGTCCGTTATCAACTTGAAAAAGTGGCACCGAGTCGGTGCTTTTTT
1|Neg_Control_Human_0078|NegCtrl	GAGGCAAGCCGTTAGGTGTA	0	2	873	504	1949	892	1075	437	0	1306	1495	378	2514	0	1396	1020	2584	n/a	NegCtrl	NegCtrl|08	1|Neg_Control_Human_0078|NegCtrl	NegCtrl	ACCGGAGGCAAGCCGTTAGGTGTAGTTTAAGAGCTATGCTGGAAACAGCATAGCAAGTTTAAATAAGGCTAGTCCGTTATCAACTTGAAAAAGTGGCACCGAGTCGGTGCTTTTTT
1|Neg_Control_Human_0079|NegCtrl	GCGGATCCAGATCTCATTCG	1	518	1132	1008	1	567	462	748	0	1654	1321	625	2982	1534	1457	1641	2675	n/a	NegCtrl	NegCtrl|08	1|Neg_Control_Human_0079|NegCtrl	NegCtrl	ACCGGCGGATCCAGATCTCATTCGGTTTAAGAGCTATGCTGGAAACAGCATAGCAAGTTTAAATAAGGCTAGTCCGTTATCAACTTGAAAAAGTGGCACCGAGTCGGTGCTTTTTT
1|Neg_Control_Human_0080|NegCtrl	GGAACATAGGAGCACGTAGT	0	450	791	958	842	0	361	613	2580	0	928	1043	1	0	736	1864	2576	n/a	NegCtrl	NegCtrl|08	1|Neg_Control_Human_0080|NegCtrl	NegCtrl	ACCGGGAACATAGGAGCACGTAGTGTTTAAGAGCTATGCTGGAAACAGCATAGCAAGTTTAAATAAGGCTAGTCCGTTATCAACTTGAAAAAGTGGCACCGAGTCGGTGCTTTTTT
1|Neg_Control_Human_0081|NegCtrl	GTCATCATTATGGCGTAAGG	3907	1363	909	958	3604	432	598	527	0	4577	1131	460	1	2711	894	901	2268	n/a	NegCtrl	NegCtrl|09	1|Neg_Control_Human_0081|NegCtrl	NegCtrl	ACCGGTCATCATTATGGCGTAAGGGTTTAAGAGCTATGCTGGAAACAGCATAGCAAGTTTAAATAAGGCTAGTCCGTTATCAACTTGAAAAAGTGGCACCGAGTCGGTGCTTTTTT
1|Neg_Control_Human_0082|NegCtrl	GCGACTAGCGCCATGAGCGG	1	1448	1778	1479	3	1160	1942	1486	0	2062	1759	1193	2	1866	2279	2587	3862	n/a	NegCtrl	NegCtrl|09	1|Neg_Control_Human_0082|NegCtrl	NegCtrl	ACCGGCGACTAGCGCCATGAGCGGGTTTAAGAGCTATGCTGGAAACAGCATAGCAAGTTTAAATAAGGCTAGTCCGTTATCAACTTGAAAAAGTGGCACCGAGTCGGTGCTTTTTT
1|Neg_Control_Human_0083|NegCtrl	GGCGAAGTTCGACATGACAC	1	3638	3062	2302	1	1166	1754	2237	0	4706	3822	2573	5	5317	3438	3575	7608	n/a	NegCtrl	NegCtrl|09	1|Neg_Control_Human_0083|NegCtrl	NegCtrl	ACCGGGCGAAGTTCGACATGACACGTTTAAGAGCTATGCTGGAAACAGCATAGCAAGTTTAAATAAGGCTAGTCCGTTATCAACTTGAAAAAGTGGCACCGAGTCGGTGCTTTTTT
1|Neg_Control_Human_0084|NegCtrl	GCTGTCGTGTGGAGGCTATG	0	1401	806	800	1	262	743	487	0	1	1279	211	2	0	1183	1673	2407	n/a	NegCtrl	NegCtrl|09	1|Neg_Control_Human_0084|NegCtrl	NegCtrl	ACCGGCTGTCGTGTGGAGGCTATGGTTTAAGAGCTATGCTGGAAACAGCATAGCAAGTTTAAATAAGGCTAGTCCGTTATCAACTTGAAAAAGTGGCACCGAGTCGGTGCTTTTTT
1|Neg_Control_Human_0085|NegCtrl	GCGGAGAGCATTGACCTCAT	0	0	1274	1072	0	532	942	1034	0	0	1440	1213	0	0	1597	2412	2902	n/a	NegCtrl	NegCtrl|09	1|Neg_Control_Human_0085|NegCtrl	NegCtrl	ACCGGCGGAGAGCATTGACCTCATGTTTAAGAGCTATGCTGGAAACAGCATAGCAAGTTTAAATAAGGCTAGTCCGTTATCAACTTGAAAAAGTGGCACCGAGTCGGTGCTTTTTT
1|Neg_Control_Human_0086|NegCtrl	GACTAATGGACCAAGTCAGT	0	1551	1776	1780	2	862	2188	1305	9090	2187	1796	1460	2649	1375	3088	1768	4967	n/a	NegCtrl	NegCtrl|09	1|Neg_Control_Human_0086|NegCtrl	NegCtrl	ACCGGACTAATGGACCAAGTCAGTGTTTAAGAGCTATGCTGGAAACAGCATAGCAAGTTTAAATAAGGCTAGTCCGTTATCAACTTGAAAAAGTGGCACCGAGTCGGTGCTTTTTT
1|Neg_Control_Human_0087|NegCtrl	GCGGATTAGAGGTAATGCGG	0	3292	2108	1871	1	781	1151	1857	19000	0	3002	2075	2292	2628	1928	2849	5137	n/a	NegCtrl	NegCtrl|09	1|Neg_Control_Human_0087|NegCtrl	NegCtrl	ACCGGCGGATTAGAGGTAATGCGGGTTTAAGAGCTATGCTGGAAACAGCATAGCAAGTTTAAATAAGGCTAGTCCGTTATCAACTTGAAAAAGTGGCACCGAGTCGGTGCTTTTTT
1|Neg_Control_Human_0088|NegCtrl	GCCGACGGCAATCAGTACGC	2046	2915	1435	1093	1	0	538	673	0	1	1326	761	4018	1170	1008	1881	2986	n/a	NegCtrl	NegCtrl|09	1|Neg_Control_Human_0088|NegCtrl	NegCtrl	ACCGGCCGACGGCAATCAGTACGCGTTTAAGAGCTATGCTGGAAACAGCATAGCAAGTTTAAATAAGGCTAGTCCGTTATCAACTTGAAAAAGTGGCACCGAGTCGGTGCTTTTTT
1|Neg_Control_Human_0089|NegCtrl	GTAACCTCTCGAGCGATAGA	0	0	920	520	1	733	644	680	0	0	675	691	0	1542	1115	2292	1716	n/a	NegCtrl	NegCtrl|09	1|Neg_Control_Human_0089|NegCtrl	NegCtrl	ACCGGTAACCTCTCGAGCGATAGAGTTTAAGAGCTATGCTGGAAACAGCATAGCAAGTTTAAATAAGGCTAGTCCGTTATCAACTTGAAAAAGTGGCACCGAGTCGGTGCTTTTTT
1|Neg_Control_Human_0090|NegCtrl	GACTTGTATGTGGCTTACGG	0	1771	824	920	1725	44	732	580	0	1	810	966	1818	1	981	801	2649	n/a	NegCtrl	NegCtrl|09	1|Neg_Control_Human_0090|NegCtrl	NegCtrl	ACCGGACTTGTATGTGGCTTACGGGTTTAAGAGCTATGCTGGAAACAGCATAGCAAGTTTAAATAAGGCTAGTCCGTTATCAACTTGAAAAAGTGGCACCGAGTCGGTGCTTTTTT
1|Neg_Control_Human_0091|NegCtrl	GTCACTGTGGTCGAACATGT	3804	612	758	877	6	1253	793	666	0	2221	910	609	73	0	1012	778	2498	n/a	NegCtrl	NegCtrl|10	1|Neg_Control_Human_0091|NegCtrl	NegCtrl	ACCGGTCACTGTGGTCGAACATGTGTTTAAGAGCTATGCTGGAAACAGCATAGCAAGTTTAAATAAGGCTAGTCCGTTATCAACTTGAAAAAGTGGCACCGAGTCGGTGCTTTTTT
1|Neg_Control_Human_0092|NegCtrl	GTACTCCAATCCGCGATGAC	0	615	555	623	2289	0	834	597	0	0	1559	286	2	1	652	2073	2108	n/a	NegCtrl	NegCtrl|10	1|Neg_Control_Human_0092|NegCtrl	NegCtrl	ACCGGTACTCCAATCCGCGATGACGTTTAAGAGCTATGCTGGAAACAGCATAGCAAGTTTAAATAAGGCTAGTCCGTTATCAACTTGAAAAAGTGGCACCGAGTCGGTGCTTTTTT
1|Neg_Control_Human_0093|NegCtrl	GCGTTGGCACGATGTTACGG	0	1692	2147	2655	1044	223	1276	1883	0	0	1699	848	2380	57	1613	2221	4641	n/a	NegCtrl	NegCtrl|10	1|Neg_Control_Human_0093|NegCtrl	NegCtrl	ACCGGCGTTGGCACGATGTTACGGGTTTAAGAGCTATGCTGGAAACAGCATAGCAAGTTTAAATAAGGCTAGTCCGTTATCAACTTGAAAAAGTGGCACCGAGTCGGTGCTTTTTT
1|Neg_Control_Human_0094|NegCtrl	GAACCAGCCGGCTAGTATGA	0	645	977	830	1	1359	570	589	0	1920	1367	538	3938	2	566	1545	1985	n/a	NegCtrl	NegCtrl|10	1|Neg_Control_Human_0094|NegCtrl	NegCtrl	ACCGGAACCAGCCGGCTAGTATGAGTTTAAGAGCTATGCTGGAAACAGCATAGCAAGTTTAAATAAGGCTAGTCCGTTATCAACTTGAAAAAGTGGCACCGAGTCGGTGCTTTTTT
1|Neg_Control_Human_0095|NegCtrl	GTATACTAGCTAACCACACG	0	752	1115	763	3	268	1194	809	0	0	1226	667	4	0	941	1926	4317	n/a	NegCtrl	NegCtrl|10	1|Neg_Control_Human_0095|NegCtrl	NegCtrl	ACCGGTATACTAGCTAACCACACGGTTTAAGAGCTATGCTGGAAACAGCATAGCAAGTTTAAATAAGGCTAGTCCGTTATCAACTTGAAAAAGTGGCACCGAGTCGGTGCTTTTTT
1|Neg_Control_Human_0096|NegCtrl	GAATCGGAATAGTTGATTCG	2157	641	1027	666	1	193	358	673	1	2036	1183	589	2378	2454	686	915	2584	n/a	NegCtrl	NegCtrl|10	1|Neg_Control_Human_0096|NegCtrl	NegCtrl	ACCGGAATCGGAATAGTTGATTCGGTTTAAGAGCTATGCTGGAAACAGCATAGCAAGTTTAAATAAGGCTAGTCCGTTATCAACTTGAAAAAGTGGCACCGAGTCGGTGCTTTTTT
1|Neg_Control_Human_0097|NegCtrl	GAGCACTTGCATGAGGCGGT	2263	2028	737	586	0	490	816	569	0	0	1505	504	0	2608	1216	1584	1961	n/a	NegCtrl	NegCtrl|10	1|Neg_Control_Human_0097|NegCtrl	NegCtrl	ACCGGAGCACTTGCATGAGGCGGTGTTTAAGAGCTATGCTGGAAACAGCATAGCAAGTTTAAATAAGGCTAGTCCGTTATCAACTTGAAAAAGTGGCACCGAGTCGGTGCTTTTTT
1|Neg_Control_Human_0098|NegCtrl	GAACGGCGATGAAGCCAGCC	1	0	1172	1001	0	1281	1440	981	0	3039	1714	975	4582	1367	839	1111	2833	n/a	NegCtrl	NegCtrl|10	1|Neg_Control_Human_0098|NegCtrl	NegCtrl	ACCGGAACGGCGATGAAGCCAGCCGTTTAAGAGCTATGCTGGAAACAGCATAGCAAGTTTAAATAAGGCTAGTCCGTTATCAACTTGAAAAAGTGGCACCGAGTCGGTGCTTTTTT
1|Neg_Control_Human_0099|NegCtrl	GCAACCGAGATGAGAGGTTC	2662	2263	2969	2716	1420	1338	2798	2136	19821	1754	3891	1543	3733	3271	3257	3812	5126	n/a	NegCtrl	NegCtrl|10	1|Neg_Control_Human_0099|NegCtrl	NegCtrl	ACCGGCAACCGAGATGAGAGGTTCGTTTAAGAGCTATGCTGGAAACAGCATAGCAAGTTTAAATAAGGCTAGTCCGTTATCAACTTGAAAAAGTGGCACCGAGTCGGTGCTTTTTT
1|Neg_Control_Human_0100|NegCtrl	GCAAGATCAATATGCGTGAT	0	0	439	634	1	0	1170	856	0	0	1028	376	0	0	951	2047	2226	n/a	NegCtrl	NegCtrl|10	1|Neg_Control_Human_0100|NegCtrl	NegCtrl	ACCGGCAAGATCAATATGCGTGATGTTTAAGAGCTATGCTGGAAACAGCATAGCAAGTTTAAATAAGGCTAGTCCGTTATCAACTTGAAAAAGTGGCACCGAGTCGGTGCTTTTTT
1|Neg_Control_Human_GA_0101|NegCtrl	ACGGAGGCTAAGCGTCGCAA	0	1188	2105	2251	1	966	917	1521	9866	0	1943	1335	1	2121	1667	1329	5090	n/a	NegCtrl	NegCtrl|11	1|Neg_Control_Human_GA_0101|NegCtrl	NegCtrl	ACCGACGGAGGCTAAGCGTCGCAAGTTTAAGAGCTATGCTGGAAACAGCATAGCAAGTTTAAATAAGGCTAGTCCGTTATCAACTTGAAAAAGTGGCACCGAGTCGGTGCTTTTTT
1|Neg_Control_Human_GA_0102|NegCtrl	CGCTTCCGCGGCCCGTTCAA	0	1700	801	722	0	0	675	730	1	0	1237	732	0	1675	918	478	2131	n/a	NegCtrl	NegCtrl|11	1|Neg_Control_Human_GA_0102|NegCtrl	NegCtrl	ACCGCGCTTCCGCGGCCCGTTCAAGTTTAAGAGCTATGCTGGAAACAGCATAGCAAGTTTAAATAAGGCTAGTCCGTTATCAACTTGAAAAAGTGGCACCGAGTCGGTGCTTTTTT
1|Neg_Control_Human_GA_0103|NegCtrl	ATCGTTTCCGCTTAACGGCG	2535	1199	1350	960	1245	171	26	562	0	2751	1543	365	2603	3	1260	2361	2946	n/a	NegCtrl	NegCtrl|11	1|Neg_Control_Human_GA_0103|NegCtrl	NegCtrl	ACCGATCGTTTCCGCTTAACGGCGGTTTAAGAGCTATGCTGGAAACAGCATAGCAAGTTTAAATAAGGCTAGTCCGTTATCAACTTGAAAAAGTGGCACCGAGTCGGTGCTTTTTT
1|Neg_Control_Human_GA_0104|NegCtrl	GTAGGCGCGCCGCTCTCTAC	0	816	1000	780	2	1443	948	672	17212	0	1431	342	2157	1	1042	1227	2768	n/a	NegCtrl	NegCtrl|11	1|Neg_Control_Human_GA_0104|NegCtrl	NegCtrl	ACCGGTAGGCGCGCCGCTCTCTACGTTTAAGAGCTATGCTGGAAACAGCATAGCAAGTTTAAATAAGGCTAGTCCGTTATCAACTTGAAAAAGTGGCACCGAGTCGGTGCTTTTTT
1|Neg_Control_Human_GA_0105|NegCtrl	CCATATCGGGGCGAGACATG	0	872	1913	1286	1	247	1335	1276	0	3511	1953	1523	4418	4	1528	1427	3452	n/a	NegCtrl	NegCtrl|11	1|Neg_Control_Human_GA_0105|NegCtrl	NegCtrl	ACCGCCATATCGGGGCGAGACATGGTTTAAGAGCTATGCTGGAAACAGCATAGCAAGTTTAAATAAGGCTAGTCCGTTATCAACTTGAAAAAGTGGCACCGAGTCGGTGCTTTTTT
1|Neg_Control_Human_GA_0106|NegCtrl	TACTAACGCCGCTCCTACAG	0	1166	1864	1676	0	962	2085	1175	1	0	2463	1345	3059	1582	2537	1885	4730	n/a	NegCtrl	NegCtrl|11	1|Neg_Control_Human_GA_0106|NegCtrl	NegCtrl	ACCGTACTAACGCCGCTCCTACAGGTTTAAGAGCTATGCTGGAAACAGCATAGCAAGTTTAAATAAGGCTAGTCCGTTATCAACTTGAAAAAGTGGCACCGAGTCGGTGCTTTTTT
1|Neg_Control_Human_GA_0107|NegCtrl	TGAGGATCATGTCGAGCGCC	0	2202	2955	3260	3	1326	1703	1766	1	1331	3178	2758	3511	2244	2889	3594	7324	n/a	NegCtrl	NegCtrl|11	1|Neg_Control_Human_GA_0107|NegCtrl	NegCtrl	ACCGTGAGGATCATGTCGAGCGCCGTTTAAGAGCTATGCTGGAAACAGCATAGCAAGTTTAAATAAGGCTAGTCCGTTATCAACTTGAAAAAGTGGCACCGAGTCGGTGCTTTTTT
1|Neg_Control_Human_GA_0108|NegCtrl	GGGCCCGCATAGGATATCGC	0	2203	983	924	1	0	801	568	0	0	1606	290	2	1282	1053	918	2610	n/a	NegCtrl	NegCtrl|11	1|Neg_Control_Human_GA_0108|NegCtrl	NegCtrl	ACCGGGGCCCGCATAGGATATCGCGTTTAAGAGCTATGCTGGAAACAGCATAGCAAGTTTAAATAAGGCTAGTCCGTTATCAACTTGAAAAAGTGGCACCGAGTCGGTGCTTTTTT
1|Neg_Control_Human_GA_0109|NegCtrl	TAGACAACCGCGGAGAATGC	2624	907	1302	1272	1587	433	133	795	0	0	1549	827	2	4186	1188	2255	2634	n/a	NegCtrl	NegCtrl|11	1|Neg_Control_Human_GA_0109|NegCtrl	NegCtrl	ACCGTAGACAACCGCGGAGAATGCGTTTAAGAGCTATGCTGGAAACAGCATAGCAAGTTTAAATAAGGCTAGTCCGTTATCAACTTGAAAAAGTGGCACCGAGTCGGTGCTTTTTT
1|Neg_Control_Human_GA_0110|NegCtrl	ACGGGCGGCTATCGCTGACT	0	2015	1764	1623	3	1098	1468	1189	0	0	1899	631	3	0	1581	2064	3928	n/a	NegCtrl	NegCtrl|11	1|Neg_Control_Human_GA_0110|NegCtrl	NegCtrl	ACCGACGGGCGGCTATCGCTGACTGTTTAAGAGCTATGCTGGAAACAGCATAGCAAGTTTAAATAAGGCTAGTCCGTTATCAACTTGAAAAAGTGGCACCGAGTCGGTGCTTTTTT
1|Neg_Control_Human_GA_0111|NegCtrl	CGCGGAAATTTTACCGACGA	0	1877	733	836	2899	531	643	833	0	1	1258	714	0	793	1274	2493	2666	n/a	NegCtrl	NegCtrl|12	1|Neg_Control_Human_GA_0111|NegCtrl	NegCtrl	ACCGCGCGGAAATTTTACCGACGAGTTTAAGAGCTATGCTGGAAACAGCATAGCAAGTTTAAATAAGGCTAGTCCGTTATCAACTTGAAAAAGTGGCACCGAGTCGGTGCTTTTTT
1|Neg_Control_Human_GA_0112|NegCtrl	CTTACAATCGTCGGTCCAAT	1757	751	679	725	0	57	716	851	0	0	1606	312	3565	3	723	1530	2231	n/a	NegCtrl	NegCtrl|12	1|Neg_Control_Human_GA_0112|NegCtrl	NegCtrl	ACCGCTTACAATCGTCGGTCCAATGTTTAAGAGCTATGCTGGAAACAGCATAGCAAGTTTAAATAAGGCTAGTCCGTTATCAACTTGAAAAAGTGGCACCGAGTCGGTGCTTTTTT
1|Neg_Control_Human_GA_0113|NegCtrl	GCGTGCGTCCCGGGTTACCC	4171	4603	2054	2078	4	1228	2861	2302	0	2741	2664	1394	763	3454	2805	3842	6115	n/a	NegCtrl	NegCtrl|12	1|Neg_Control_Human_GA_0113|NegCtrl	NegCtrl	ACCGGCGTGCGTCCCGGGTTACCCGTTTAAGAGCTATGCTGGAAACAGCATAGCAAGTTTAAATAAGGCTAGTCCGTTATCAACTTGAAAAAGTGGCACCGAGTCGGTGCTTTTTT
1|Neg_Control_Human_GA_0114|NegCtrl	CGGAGTAACAAGCGGACGGA	1	2448	965	1089	1426	289	839	757	0	0	996	323	1	0	759	804	2303	n/a	NegCtrl	NegCtrl|12	1|Neg_Control_Human_GA_0114|NegCtrl	NegCtrl	ACCGCGGAGTAACAAGCGGACGGAGTTTAAGAGCTATGCTGGAAACAGCATAGCAAGTTTAAATAAGGCTAGTCCGTTATCAACTTGAAAAAGTGGCACCGAGTCGGTGCTTTTTT
1|Neg_Control_Human_GA_0115|NegCtrl	CGAGTGTTATACGCACCGTT	4127	0	825	555	0	415	1151	382	0	1333	1339	409	0	0	421	1113	2880	n/a	NegCtrl	NegCtrl|12	1|Neg_Control_Human_GA_0115|NegCtrl	NegCtrl	ACCGCGAGTGTTATACGCACCGTTGTTTAAGAGCTATGCTGGAAACAGCATAGCAAGTTTAAATAAGGCTAGTCCGTTATCAACTTGAAAAAGTGGCACCGAGTCGGTGCTTTTTT
1|Neg_Control_Human_GA_0116|NegCtrl	CGACTAACCGGAAACTTTTT	2	1613	1289	1060	2	493	421	979	0	0	1070	605	2	1951	1345	1645	3193	n/a	NegCtrl	NegCtrl|12	1|Neg_Control_Human_GA_0116|NegCtrl	NegCtrl	ACCGCGACTAACCGGAAACTTTTTGTTTAAGAGCTATGCTGGAAACAGCATAGCAAGTTTAAATAAGGCTAGTCCGTTATCAACTTGAAAAAGTGGCACCGAGTCGGTGCTTTTTT
1|Neg_Control_Human_GA_0117|NegCtrl	CAACGGGTTCTCCCGGCTAC	1	443	1580	1533	1078	2166	1807	1213	0	5101	2308	1184	2274	3097	1873	1574	4109	n/a	NegCtrl	NegCtrl|12	1|Neg_Control_Human_GA_0117|NegCtrl	NegCtrl	ACCGCAACGGGTTCTCCCGGCTACGTTTAAGAGCTATGCTGGAAACAGCATAGCAAGTTTAAATAAGGCTAGTCCGTTATCAACTTGAAAAAGTGGCACCGAGTCGGTGCTTTTTT
1|Neg_Control_Human_GA_0118|NegCtrl	CAGGAGTCGCCGATACGCGT	1649	234	1433	750	1118	513	305	913	0	2081	1254	614	1	973	1291	1494	2844	n/a	NegCtrl	NegCtrl|12	1|Neg_Control_Human_GA_0118|NegCtrl	NegCtrl	ACCGCAGGAGTCGCCGATACGCGTGTTTAAGAGCTATGCTGGAAACAGCATAGCAAGTTTAAATAAGGCTAGTCCGTTATCAACTTGAAAAAGTGGCACCGAGTCGGTGCTTTTTT
1|Neg_Control_Human_GA_0119|NegCtrl	TTCACGTCGTCTCGCGACCA	0	311	886	780	0	254	389	241	0	0	693	500	0	765	283	454	2516	n/a	NegCtrl	NegCtrl|12	1|Neg_Control_Human_GA_0119|NegCtrl	NegCtrl	ACCGTTCACGTCGTCTCGCGACCAGTTTAAGAGCTATGCTGGAAACAGCATAGCAAGTTTAAATAAGGCTAGTCCGTTATCAACTTGAAAAAGTGGCACCGAGTCGGTGCTTTTTT
1|Neg_Control_Human_GA_0120|NegCtrl	GTGTCGGATTCCGCCGCTTA	1925	402	894	773	2	641	1340	851	0	2054	1008	766	4	979	1078	1438	2672	n/a	NegCtrl	NegCtrl|12	1|Neg_Control_Human_GA_0120|NegCtrl	NegCtrl	ACCGGTGTCGGATTCCGCCGCTTAGTTTAAGAGCTATGCTGGAAACAGCATAGCAAGTTTAAATAAGGCTAGTCCGTTATCAACTTGAAAAAGTGGCACCGAGTCGGTGCTTTTTT
1|Neg_Control_Human_GA_0121|NegCtrl	CACGAACTCACACCGCGCGA	2609	1793	2223	1532	2516	455	1260	1328	1	1	2449	979	1227	935	1458	2691	4810	n/a	NegCtrl	NegCtrl|13	1|Neg_Control_Human_GA_0121|NegCtrl	NegCtrl	ACCGCACGAACTCACACCGCGCGAGTTTAAGAGCTATGCTGGAAACAGCATAGCAAGTTTAAATAAGGCTAGTCCGTTATCAACTTGAAAAAGTGGCACCGAGTCGGTGCTTTTTT
1|Neg_Control_Human_GA_0122|NegCtrl	CGCTAGTACGCTCCTCTATA	0	0	1081	773	0	582	1027	665	0	0	834	799	2	1749	1323	2206	2412	n/a	NegCtrl	NegCtrl|13	1|Neg_Control_Human_GA_0122|NegCtrl	NegCtrl	ACCGCGCTAGTACGCTCCTCTATAGTTTAAGAGCTATGCTGGAAACAGCATAGCAAGTTTAAATAAGGCTAGTCCGTTATCAACTTGAAAAAGTGGCACCGAGTCGGTGCTTTTTT
1|Neg_Control_Human_GA_0123|NegCtrl	TCGCGCTTGGGTTATACGCT	1	1371	826	762	1	875	84	432	0	3660	778	505	190	0	1076	813	2460	n/a	NegCtrl	NegCtrl|13	1|Neg_Control_Human_GA_0123|NegCtrl	NegCtrl	ACCGTCGCGCTTGGGTTATACGCTGTTTAAGAGCTATGCTGGAAACAGCATAGCAAGTTTAAATAAGGCTAGTCCGTTATCAACTTGAAAAAGTGGCACCGAGTCGGTGCTTTTTT
1|Neg_Control_Human_GA_0124|NegCtrl	CTATCTCGAGTGGTAATGCG	4133	4543	2320	1799	2	980	1125	1387	0	0	2045	1448	0	1732	2058	2941	4692	n/a	NegCtrl	NegCtrl|13	1|Neg_Control_Human_GA_0124|NegCtrl	NegCtrl	ACCGCTATCTCGAGTGGTAATGCGGTTTAAGAGCTATGCTGGAAACAGCATAGCAAGTTTAAATAAGGCTAGTCCGTTATCAACTTGAAAAAGTGGCACCGAGTCGGTGCTTTTTT
1|Neg_Control_Human_GA_0125|NegCtrl	AATCGACTCGAACTTCGTGT	0	423	1146	1088	0	414	577	395	0	3058	1063	837	3882	3491	1316	1928	2622	n/a	NegCtrl	NegCtrl|13	1|Neg_Control_Human_GA_0125|NegCtrl	NegCtrl	ACCGAATCGACTCGAACTTCGTGTGTTTAAGAGCTATGCTGGAAACAGCATAGCAAGTTTAAATAAGGCTAGTCCGTTATCAACTTGAAAAAGTGGCACCGAGTCGGTGCTTTTTT
1|Neg_Control_Human_GA_0126|NegCtrl	CCCGATGGACTATACCGAAC	0	1673	1991	1505	1	603	1137	872	0	0	2067	783	2	5	2724	1317	4671	n/a	NegCtrl	NegCtrl|13	1|Neg_Control_Human_GA_0126|NegCtrl	NegCtrl	ACCGCCCGATGGACTATACCGAACGTTTAAGAGCTATGCTGGAAACAGCATAGCAAGTTTAAATAAGGCTAGTCCGTTATCAACTTGAAAAAGTGGCACCGAGTCGGTGCTTTTTT
1|Neg_Control_Human_GA_0127|NegCtrl	ACGTTCGAGTACGACCAGCT	6368	4313	1993	2105	1983	819	1675	1901	27598	1	3251	1542	1	1636	3079	2999	5610	n/a	NegCtrl	NegCtrl|13	1|Neg_Control_Human_GA_0127|NegCtrl	NegCtrl	ACCGACGTTCGAGTACGACCAGCTGTTTAAGAGCTATGCTGGAAACAGCATAGCAAGTTTAAATAAGGCTAGTCCGTTATCAACTTGAAAAAGTGGCACCGAGTCGGTGCTTTTTT
1|Neg_Control_Human_GA_0128|NegCtrl	CGCGACGACTCAACCTAGTC	1	1948	1089	1121	3	218	806	764	0	0	849	841	1880	3	1298	770	3256	n/a	NegCtrl	NegCtrl|13	1|Neg_Control_Human_GA_0128|NegCtrl	NegCtrl	ACCGCGCGACGACTCAACCTAGTCGTTTAAGAGCTATGCTGGAAACAGCATAGCAAGTTTAAATAAGGCTAGTCCGTTATCAACTTGAAAAAGTGGCACCGAGTCGGTGCTTTTTT
1|Neg_Control_Human_GA_0129|NegCtrl	GGTCACCGATCGAGAGCTAG	0	911	1154	1155	3	270	1828	1329	0	1	2201	912	2012	0	1496	2466	2975	n/a	NegCtrl	NegCtrl|13	1|Neg_Control_Human_GA_0129|NegCtrl	NegCtrl	ACCGGGTCACCGATCGAGAGCTAGGTTTAAGAGCTATGCTGGAAACAGCATAGCAAGTTTAAATAAGGCTAGTCCGTTATCAACTTGAAAAAGTGGCACCGAGTCGGTGCTTTTTT
1|Neg_Control_Human_GA_0130|NegCtrl	CTCAACCGACCGTATGGTCA	2194	1140	1418	1283	1	759	1400	938	0	3297	1819	861	6	5732	2115	3510	4199	n/a	NegCtrl	NegCtrl|13	1|Neg_Control_Human_GA_0130|NegCtrl	NegCtrl	ACCGCTCAACCGACCGTATGGTCAGTTTAAGAGCTATGCTGGAAACAGCATAGCAAGTTTAAATAAGGCTAGTCCGTTATCAACTTGAAAAAGTGGCACCGAGTCGGTGCTTTTTT
1|Neg_Control_Human_GA_0131|NegCtrl	CGTATTCGACTCTCAACGCG	3354	0	1138	690	0	1101	640	381	0	1	1563	507	2	2903	656	1174	2154	n/a	NegCtrl	NegCtrl|14	1|Neg_Control_Human_GA_0131|NegCtrl	NegCtrl	ACCGCGTATTCGACTCTCAACGCGGTTTAAGAGCTATGCTGGAAACAGCATAGCAAGTTTAAATAAGGCTAGTCCGTTATCAACTTGAAAAAGTGGCACCGAGTCGGTGCTTTTTT
1|Neg_Control_Human_GA_0132|NegCtrl	CTAGCCGCCCAGATCGAGCC	0	651	1074	922	1	305	339	1131	0	0	1431	1109	0	0	1344	1098	2678	n/a	NegCtrl	NegCtrl|14	1|Neg_Control_Human_GA_0132|NegCtrl	NegCtrl	ACCGCTAGCCGCCCAGATCGAGCCGTTTAAGAGCTATGCTGGAAACAGCATAGCAAGTTTAAATAAGGCTAGTCCGTTATCAACTTGAAAAAGTGGCACCGAGTCGGTGCTTTTTT
1|Neg_Control_Human_GA_0133|NegCtrl	GAATCGACCGACACTAATGT	0	1199	2071	1188	1	357	1580	816	0	5594	1631	955	1858	556	1276	1080	4277	n/a	NegCtrl	NegCtrl|14	1|Neg_Control_Human_GA_0133|NegCtrl	NegCtrl	ACCGGAATCGACCGACACTAATGTGTTTAAGAGCTATGCTGGAAACAGCATAGCAAGTTTAAATAAGGCTAGTCCGTTATCAACTTGAAAAAGTGGCACCGAGTCGGTGCTTTTTT
1|Neg_Control_Human_GA_0134|NegCtrl	ACTTCAGTTCGGCGTAGTCA	0	6	1466	1084	3858	263	452	1145	587	1785	2282	502	2427	2	1564	1957	3154	n/a	NegCtrl	NegCtrl|14	1|Neg_Control_Human_GA_0134|NegCtrl	NegCtrl	ACCGACTTCAGTTCGGCGTAGTCAGTTTAAGAGCTATGCTGGAAACAGCATAGCAAGTTTAAATAAGGCTAGTCCGTTATCAACTTGAAAAAGTGGCACCGAGTCGGTGCTTTTTT
1|Neg_Control_Human_GA_0135|NegCtrl	GTGCGATGTCGCTTCAACGT	3540	560	1441	1480	1	1523	572	1800	0	1	1859	1166	2914	2301	1681	1922	4895	n/a	NegCtrl	NegCtrl|14	1|Neg_Control_Human_GA_0135|NegCtrl	NegCtrl	ACCGGTGCGATGTCGCTTCAACGTGTTTAAGAGCTATGCTGGAAACAGCATAGCAAGTTTAAATAAGGCTAGTCCGTTATCAACTTGAAAAAGTGGCACCGAGTCGGTGCTTTTTT
1|Neg_Control_Human_GA_0136|NegCtrl	CGCCTAATTTCCGGATCAAT	0	411	705	471	923	395	248	539	0	6445	742	687	6913	2	905	640	2471	n/a	NegCtrl	NegCtrl|14	1|Neg_Control_Human_GA_0136|NegCtrl	NegCtrl	ACCGCGCCTAATTTCCGGATCAATGTTTAAGAGCTATGCTGGAAACAGCATAGCAAGTTTAAATAAGGCTAGTCCGTTATCAACTTGAAAAAGTGGCACCGAGTCGGTGCTTTTTT
1|Neg_Control_Human_GA_0137|NegCtrl	CGTGGCCGGAACCGTCATAG	0	2360	1297	1275	2	1012	777	590	1	1883	1615	1142	1500	2831	1241	1315	3339	n/a	NegCtrl	NegCtrl|14	1|Neg_Control_Human_GA_0137|NegCtrl	NegCtrl	ACCGCGTGGCCGGAACCGTCATAGGTTTAAGAGCTATGCTGGAAACAGCATAGCAAGTTTAAATAAGGCTAGTCCGTTATCAACTTGAAAAAGTGGCACCGAGTCGGTGCTTTTTT
1|Neg_Control_Human_GA_0138|NegCtrl	ACCCTCCGAATCGTAACGGA	0	1327	1197	1122	4	243	1000	918	0	2407	419	614	1178	1396	1342	417	2118	n/a	NegCtrl	NegCtrl|14	1|Neg_Control_Human_GA_0138|NegCtrl	NegCtrl	ACCGACCCTCCGAATCGTAACGGAGTTTAAGAGCTATGCTGGAAACAGCATAGCAAGTTTAAATAAGGCTAGTCCGTTATCAACTTGAAAAAGTGGCACCGAGTCGGTGCTTTTTT
1|Neg_Control_Human_GA_0139|NegCtrl	AAACGGTACGACAGCGTGTG	2297	1568	1033	1430	2	794	570	901	0	3634	1613	867	5120	2662	2139	1541	3384	n/a	NegCtrl	NegCtrl|14	1|Neg_Control_Human_GA_0139|NegCtrl	NegCtrl	ACCGAAACGGTACGACAGCGTGTGGTTTAAGAGCTATGCTGGAAACAGCATAGCAAGTTTAAATAAGGCTAGTCCGTTATCAACTTGAAAAAGTGGCACCGAGTCGGTGCTTTTTT
1|Neg_Control_Human_GA_0140|NegCtrl	ACATAGTCGACGGCTCGATT	3124	1398	1680	1464	1337	1677	1006	1481	0	3540	1816	1036	1	5512	1490	2613	4300	n/a	NegCtrl	NegCtrl|14	1|Neg_Control_Human_GA_0140|NegCtrl	NegCtrl	ACCGACATAGTCGACGGCTCGATTGTTTAAGAGCTATGCTGGAAACAGCATAGCAAGTTTAAATAAGGCTAGTCCGTTATCAACTTGAAAAAGTGGCACCGAGTCGGTGCTTTTTT
1|Neg_Control_Human_GA_0141|NegCtrl	GATGGCGCTTCAGTCGTCGG	0	3467	1721	1843	3	191	1011	966	0	0	1364	895	4689	1109	1949	3192	4611	n/a	NegCtrl	NegCtrl|15	1|Neg_Control_Human_GA_0141|NegCtrl	NegCtrl	ACCGGATGGCGCTTCAGTCGTCGGGTTTAAGAGCTATGCTGGAAACAGCATAGCAAGTTTAAATAAGGCTAGTCCGTTATCAACTTGAAAAAGTGGCACCGAGTCGGTGCTTTTTT
1|Neg_Control_Human_GA_0142|NegCtrl	ATAATCCGGAAACGCTCGAC	3295	2392	1615	1301	1621	624	761	1365	8	4984	1682	917	1	589	1317	1983	3935	n/a	NegCtrl	NegCtrl|15	1|Neg_Control_Human_GA_0142|NegCtrl	NegCtrl	ACCGATAATCCGGAAACGCTCGACGTTTAAGAGCTATGCTGGAAACAGCATAGCAAGTTTAAATAAGGCTAGTCCGTTATCAACTTGAAAAAGTGGCACCGAGTCGGTGCTTTTTT
1|Neg_Control_Human_GA_0143|NegCtrl	CGCCGGGCTGACAATTAACG	0	1585	1642	1619	1585	832	1130	1345	0	3069	1960	1579	0	0	1395	2186	4088	n/a	NegCtrl	NegCtrl|15	1|Neg_Control_Human_GA_0143|NegCtrl	NegCtrl	ACCGCGCCGGGCTGACAATTAACGGTTTAAGAGCTATGCTGGAAACAGCATAGCAAGTTTAAATAAGGCTAGTCCGTTATCAACTTGAAAAAGTGGCACCGAGTCGGTGCTTTTTT
1|Neg_Control_Human_GA_0144|NegCtrl	CGTCGCCATATGCCGGTGGC	0	1547	1287	1049	1	0	680	789	0	1184	1492	869	2615	6	1116	1938	2846	n/a	NegCtrl	NegCtrl|15	1|Neg_Control_Human_GA_0144|NegCtrl	NegCtrl	ACCGCGTCGCCATATGCCGGTGGCGTTTAAGAGCTATGCTGGAAACAGCATAGCAAGTTTAAATAAGGCTAGTCCGTTATCAACTTGAAAAAGTGGCACCGAGTCGGTGCTTTTTT
1|Neg_Control_Human_GA_0145|NegCtrl	CGGGCCTATAACACCATCGA	0	1402	1772	1312	1492	71	975	1479	0	2404	1533	1427	5650	2419	2903	3013	4527	n/a	NegCtrl	NegCtrl|15	1|Neg_Control_Human_GA_0145|NegCtrl	NegCtrl	ACCGCGGGCCTATAACACCATCGAGTTTAAGAGCTATGCTGGAAACAGCATAGCAAGTTTAAATAAGGCTAGTCCGTTATCAACTTGAAAAAGTGGCACCGAGTCGGTGCTTTTTT
1|Neg_Control_Human_GA_0146|NegCtrl	CGCCGTTCCGAGATACTTGA	0	922	1179	952	1183	770	532	895	0	0	1027	378	0	0	1103	1477	2533	n/a	NegCtrl	NegCtrl|15	1|Neg_Control_Human_GA_0146|NegCtrl	NegCtrl	ACCGCGCCGTTCCGAGATACTTGAGTTTAAGAGCTATGCTGGAAACAGCATAGCAAGTTTAAATAAGGCTAGTCCGTTATCAACTTGAAAAAGTGGCACCGAGTCGGTGCTTTTTT
1|Neg_Control_Human_GA_0147|NegCtrl	CGGGACGTCGCGAAAATGTA	0	0	997	887	2	585	493	699	0	3704	1270	633	0	1390	924	1757	3133	n/a	NegCtrl	NegCtrl|15	1|Neg_Control_Human_GA_0147|NegCtrl	NegCtrl	ACCGCGGGACGTCGCGAAAATGTAGTTTAAGAGCTATGCTGGAAACAGCATAGCAAGTTTAAATAAGGCTAGTCCGTTATCAACTTGAAAAAGTGGCACCGAGTCGGTGCTTTTTT
1|Neg_Control_Human_GA_0148|NegCtrl	TCGGCATACGGGACACACGC	0	515	1170	768	1457	561	587	876	0	0	800	456	0	2235	1403	1223	2482	n/a	NegCtrl	NegCtrl|15	1|Neg_Control_Human_GA_0148|NegCtrl	NegCtrl	ACCGTCGGCATACGGGACACACGCGTTTAAGAGCTATGCTGGAAACAGCATAGCAAGTTTAAATAAGGCTAGTCCGTTATCAACTTGAAAAAGTGGCACCGAGTCGGTGCTTTTTT
1|Neg_Control_Human_GA_0149|NegCtrl	AGCTCCATCGCCGCGATAAT	0	1780	1495	1407	1024	955	1371	1038	0	2032	1923	823	3403	1793	1078	2507	3475	n/a	NegCtrl	NegCtrl|15	1|Neg_Control_Human_GA_0149|NegCtrl	NegCtrl	ACCGAGCTCCATCGCCGCGATAATGTTTAAGAGCTATGCTGGAAACAGCATAGCAAGTTTAAATAAGGCTAGTCCGTTATCAACTTGAAAAAGTGGCACCGAGTCGGTGCTTTTTT
1|Neg_Control_Human_GA_0150|NegCtrl	ATCGTATCATCAGCTAGCGC	0	0	1136	1041	1	236	576	397	1	11279	1137	336	0	1066	1231	1221	3321	n/a	NegCtrl	NegCtrl|15	1|Neg_Control_Human_GA_0150|NegCtrl	NegCtrl	ACCGATCGTATCATCAGCTAGCGCGTTTAAGAGCTATGCTGGAAACAGCATAGCAAGTTTAAATAAGGCTAGTCCGTTATCAACTTGAAAAAGTGGCACCGAGTCGGTGCTTTTTT
1|Neg_Control_Human_GA_0151|NegCtrl	TCGATCGAGGTTGCATTCGG	0	0	1120	1092	1	1133	1013	632	9219	2092	1919	551	0	1543	1993	1149	2909	n/a	NegCtrl	NegCtrl|16	1|Neg_Control_Human_GA_0151|NegCtrl	NegCtrl	ACCGTCGATCGAGGTTGCATTCGGGTTTAAGAGCTATGCTGGAAACAGCATAGCAAGTTTAAATAAGGCTAGTCCGTTATCAACTTGAAAAAGTGGCACCGAGTCGGTGCTTTTTT
1|Neg_Control_Human_GA_0152|NegCtrl	CTCGACAGTTCGTCCCGAGC	0	593	1143	607	682	262	194	666	0	2479	780	492	2137	2	458	690	1959	n/a	NegCtrl	NegCtrl|16	1|Neg_Control_Human_GA_0152|NegCtrl	NegCtrl	ACCGCTCGACAGTTCGTCCCGAGCGTTTAAGAGCTATGCTGGAAACAGCATAGCAAGTTTAAATAAGGCTAGTCCGTTATCAACTTGAAAAAGTGGCACCGAGTCGGTGCTTTTTT
1|Neg_Control_Human_GA_0153|NegCtrl	CGGTAGTATTAATCGCTGAC	0	0	1007	448	4007	0	114	379	0	0	971	716	0	0	388	222	2000	n/a	NegCtrl	NegCtrl|16	1|Neg_Control_Human_GA_0153|NegCtrl	NegCtrl	ACCGCGGTAGTATTAATCGCTGACGTTTAAGAGCTATGCTGGAAACAGCATAGCAAGTTTAAATAAGGCTAGTCCGTTATCAACTTGAAAAAGTGGCACCGAGTCGGTGCTTTTTT
1|Neg_Control_Human_GA_0154|NegCtrl	TGAACGCGTGTTTCCTTGCA	0	0	1007	922	0	296	890	652	0	0	828	872	1209	3	943	2142	1898	n/a	NegCtrl	NegCtrl|16	1|Neg_Control_Human_GA_0154|NegCtrl	NegCtrl	ACCGTGAACGCGTGTTTCCTTGCAGTTTAAGAGCTATGCTGGAAACAGCATAGCAAGTTTAAATAAGGCTAGTCCGTTATCAACTTGAAAAAGTGGCACCGAGTCGGTGCTTTTTT
1|Neg_Control_Human_GA_0155|NegCtrl	CGACGCTAGGTAACGTAGAG	2327	1745	1776	1755	2	36	1039	1755	0	0	3463	1908	3	124	2558	3219	4654	n/a	NegCtrl	NegCtrl|16	1|Neg_Control_Human_GA_0155|NegCtrl	NegCtrl	ACCGCGACGCTAGGTAACGTAGAGGTTTAAGAGCTATGCTGGAAACAGCATAGCAAGTTTAAATAAGGCTAGTCCGTTATCAACTTGAAAAAGTGGCACCGAGTCGGTGCTTTTTT
1|Neg_Control_Human_GA_0156|NegCtrl	CATTGTTGAGCGGGCGCGCT	1705	2936	1385	1054	1	225	1686	1459	0	0	1477	1335	214	1405	2025	1612	3974	n/a	NegCtrl	NegCtrl|16	1|Neg_Control_Human_GA_0156|NegCtrl	NegCtrl	ACCGCATTGTTGAGCGGGCGCGCTGTTTAAGAGCTATGCTGGAAACAGCATAGCAAGTTTAAATAAGGCTAGTCCGTTATCAACTTGAAAAAGTGGCACCGAGTCGGTGCTTTTTT
1|Neg_Control_Human_GA_0157|NegCtrl	CCGCTATTGAAACCGCCCAC	0	766	1944	1686	3	881	989	1784	0	3666	1694	784	21	4009	1970	4096	5293	n/a	NegCtrl	NegCtrl|16	1|Neg_Control_Human_GA_0157|NegCtrl	NegCtrl	ACCGCCGCTATTGAAACCGCCCACGTTTAAGAGCTATGCTGGAAACAGCATAGCAAGTTTAAATAAGGCTAGTCCGTTATCAACTTGAAAAAGTGGCACCGAGTCGGTGCTTTTTT
1|Neg_Control_Human_GA_0158|NegCtrl	AGACACGTCACCGGTCAAAA	2395	2526	1273	1144	1581	378	473	836	0	1998	1138	447	2627	2	1265	1086	2930	n/a	NegCtrl	NegCtrl|16	1|Neg_Control_Human_GA_0158|NegCtrl	NegCtrl	ACCGAGACACGTCACCGGTCAAAAGTTTAAGAGCTATGCTGGAAACAGCATAGCAAGTTTAAATAAGGCTAGTCCGTTATCAACTTGAAAAAGTGGCACCGAGTCGGTGCTTTTTT
1|Neg_Control_Human_GA_0159|NegCtrl	TTTACGATCTAGCGGCGTAG	1	1971	691	831	974	288	665	412	0	0	906	863	2	5220	826	2037	2509	n/a	NegCtrl	NegCtrl|16	1|Neg_Control_Human_GA_0159|NegCtrl	NegCtrl	ACCGTTTACGATCTAGCGGCGTAGGTTTAAGAGCTATGCTGGAAACAGCATAGCAAGTTTAAATAAGGCTAGTCCGTTATCAACTTGAAAAAGTGGCACCGAGTCGGTGCTTTTTT
1|Neg_Control_Human_GA_0160|NegCtrl	TTCGCACGATTGCACCTTGG	2613	3618	2521	2206	6	1999	2170	1937	0	2982	2147	1471	1377	1419	2961	3398	6351	n/a	NegCtrl	NegCtrl|16	1|Neg_Control_Human_GA_0160|NegCtrl	NegCtrl	ACCGTTCGCACGATTGCACCTTGGGTTTAAGAGCTATGCTGGAAACAGCATAGCAAGTTTAAATAAGGCTAGTCCGTTATCAACTTGAAAAAGTGGCACCGAGTCGGTGCTTTTTT
1|Neg_Control_Human_GA_0161|NegCtrl	GGTTAGAGACTAGGCGCGCG	0	1755	1782	1461	142	1182	1014	1848	883	7440	2974	1128	1	1430	2735	2326	4357	n/a	NegCtrl	NegCtrl|17	1|Neg_Control_Human_GA_0161|NegCtrl	NegCtrl	ACCGGGTTAGAGACTAGGCGCGCGGTTTAAGAGCTATGCTGGAAACAGCATAGCAAGTTTAAATAAGGCTAGTCCGTTATCAACTTGAAAAAGTGGCACCGAGTCGGTGCTTTTTT
1|Neg_Control_Human_GA_0162|NegCtrl	CCTCCGTGCTAACGCGGACG	1960	1563	1431	1177	1086	283	972	1598	0	1826	1867	649	2989	1673	1338	1699	3561	n/a	NegCtrl	NegCtrl|17	1|Neg_Control_Human_GA_0162|NegCtrl	NegCtrl	ACCGCCTCCGTGCTAACGCGGACGGTTTAAGAGCTATGCTGGAAACAGCATAGCAAGTTTAAATAAGGCTAGTCCGTTATCAACTTGAAAAAGTGGCACCGAGTCGGTGCTTTTTT
1|Neg_Control_Human_GA_0163|NegCtrl	TTATCGCGTAGTGCTGACGT	0	57	795	847	4445	556	956	1092	0	0	891	689	7556	6	1536	2096	4101	n/a	NegCtrl	NegCtrl|17	1|Neg_Control_Human_GA_0163|NegCtrl	NegCtrl	ACCGTTATCGCGTAGTGCTGACGTGTTTAAGAGCTATGCTGGAAACAGCATAGCAAGTTTAAATAAGGCTAGTCCGTTATCAACTTGAAAAAGTGGCACCGAGTCGGTGCTTTTTT
1|Neg_Control_Human_GA_0164|NegCtrl	TACGCTTGCGTTTAGCGTCC	0	0	516	388	0	0	895	312	0	0	915	273	1	0	389	1427	2248	n/a	NegCtrl	NegCtrl|17	1|Neg_Control_Human_GA_0164|NegCtrl	NegCtrl	ACCGTACGCTTGCGTTTAGCGTCCGTTTAAGAGCTATGCTGGAAACAGCATAGCAAGTTTAAATAAGGCTAGTCCGTTATCAACTTGAAAAAGTGGCACCGAGTCGGTGCTTTTTT
1|Neg_Control_Human_GA_0165|NegCtrl	CGCGGCCCACGCGTCATCGC	4009	1377	968	1069	1	497	1054	674	0	0	1203	882	5355	2	1741	2237	3447	n/a	NegCtrl	NegCtrl|17	1|Neg_Control_Human_GA_0165|NegCtrl	NegCtrl	ACCGCGCGGCCCACGCGTCATCGCGTTTAAGAGCTATGCTGGAAACAGCATAGCAAGTTTAAATAAGGCTAGTCCGTTATCAACTTGAAAAAGTGGCACCGAGTCGGTGCTTTTTT
1|Neg_Control_Human_GA_0166|NegCtrl	AGCTCGCCATGTCGGTTCTC	0	2986	2983	2128	1200	1083	2170	1876	2	1715	2650	1496	6130	3759	2272	4687	6938	n/a	NegCtrl	NegCtrl|17	1|Neg_Control_Human_GA_0166|NegCtrl	NegCtrl	ACCGAGCTCGCCATGTCGGTTCTCGTTTAAGAGCTATGCTGGAAACAGCATAGCAAGTTTAAATAAGGCTAGTCCGTTATCAACTTGAAAAAGTGGCACCGAGTCGGTGCTTTTTT
1|Neg_Control_Human_GA_0167|NegCtrl	AACTAGCCCGAGCAGCTTCG	7567	1390	2005	1618	1423	371	1242	1674	0	1822	1958	897	0	1652	1971	2086	5063	n/a	NegCtrl	NegCtrl|17	1|Neg_Control_Human_GA_0167|NegCtrl	NegCtrl	ACCGAACTAGCCCGAGCAGCTTCGGTTTAAGAGCTATGCTGGAAACAGCATAGCAAGTTTAAATAAGGCTAGTCCGTTATCAACTTGAAAAAGTGGCACCGAGTCGGTGCTTTTTT
1|Neg_Control_Human_GA_0168|NegCtrl	CGCAAGGTGTCGGTAACCCT	2981	818	932	960	3001	223	1414	718	0	0	1416	561	1134	0	973	3059	2656	n/a	NegCtrl	NegCtrl|17	1|Neg_Control_Human_GA_0168|NegCtrl	NegCtrl	ACCGCGCAAGGTGTCGGTAACCCTGTTTAAGAGCTATGCTGGAAACAGCATAGCAAGTTTAAATAAGGCTAGTCCGTTATCAACTTGAAAAAGTGGCACCGAGTCGGTGCTTTTTT
1|Neg_Control_Human_GA_0169|NegCtrl	CTTCGACGCCATCGTGCTCA	1428	2094	1650	1393	0	694	1125	775	0	0	1678	780	1	876	1642	2465	3046	n/a	NegCtrl	NegCtrl|17	1|Neg_Control_Human_GA_0169|NegCtrl	NegCtrl	ACCGCTTCGACGCCATCGTGCTCAGTTTAAGAGCTATGCTGGAAACAGCATAGCAAGTTTAAATAAGGCTAGTCCGTTATCAACTTGAAAAAGTGGCACCGAGTCGGTGCTTTTTT
1|Neg_Control_Human_GA_0170|NegCtrl	TCCTGGATACCGCGTGGTTA	1	1	879	779	2	565	774	803	1	0	1099	402	1	0	1811	2652	2529	n/a	NegCtrl	NegCtrl|17	1|Neg_Control_Human_GA_0170|NegCtrl	NegCtrl	ACCGTCCTGGATACCGCGTGGTTAGTTTAAGAGCTATGCTGGAAACAGCATAGCAAGTTTAAATAAGGCTAGTCCGTTATCAACTTGAAAAAGTGGCACCGAGTCGGTGCTTTTTT
1|Neg_Control_Human_GA_0171|NegCtrl	ATAGCCGCCGCTCATTACTT	0	0	1054	675	5	92	201	581	0	2552	1335	351	2	675	1347	806	2402	n/a	NegCtrl	NegCtrl|18	1|Neg_Control_Human_GA_0171|NegCtrl	NegCtrl	ACCGATAGCCGCCGCTCATTACTTGTTTAAGAGCTATGCTGGAAACAGCATAGCAAGTTTAAATAAGGCTAGTCCGTTATCAACTTGAAAAAGTGGCACCGAGTCGGTGCTTTTTT
1|Neg_Control_Human_GA_0172|NegCtrl	GTCGTCCGGGATTACAAAAT	0	620	966	639	1	0	332	822	0	120	460	293	1586	0	577	609	1609	n/a	NegCtrl	NegCtrl|18	1|Neg_Control_Human_GA_0172|NegCtrl	NegCtrl	ACCGGTCGTCCGGGATTACAAAATGTTTAAGAGCTATGCTGGAAACAGCATAGCAAGTTTAAATAAGGCTAGTCCGTTATCAACTTGAAAAAGTGGCACCGAGTCGGTGCTTTTTT
1|Neg_Control_Human_GA_0173|NegCtrl	TAATGCTGCACACGCCGAAT	0	1305	880	1269	0	300	1044	507	16523	3	1731	960	4278	4	751	2611	2497	n/a	NegCtrl	NegCtrl|18	1|Neg_Control_Human_GA_0173|NegCtrl	NegCtrl	ACCGTAATGCTGCACACGCCGAATGTTTAAGAGCTATGCTGGAAACAGCATAGCAAGTTTAAATAAGGCTAGTCCGTTATCAACTTGAAAAAGTGGCACCGAGTCGGTGCTTTTTT
1|Neg_Control_Human_GA_0174|NegCtrl	TATCGCTTCCGATTAGTCCG	0	0	2044	1652	0	544	1676	1070	0	0	2064	1104	4	2785	2097	1530	5664	n/a	NegCtrl	NegCtrl|18	1|Neg_Control_Human_GA_0174|NegCtrl	NegCtrl	ACCGTATCGCTTCCGATTAGTCCGGTTTAAGAGCTATGCTGGAAACAGCATAGCAAGTTTAAATAAGGCTAGTCCGTTATCAACTTGAAAAAGTGGCACCGAGTCGGTGCTTTTTT
1|Neg_Control_Human_GA_0175|NegCtrl	GTACCATACCGCGTACCCTT	0	588	540	820	2	300	459	395	0	0	640	332	0	0	718	1178	1883	n/a	NegCtrl	NegCtrl|18	1|Neg_Control_Human_GA_0175|NegCtrl	NegCtrl	ACCGGTACCATACCGCGTACCCTTGTTTAAGAGCTATGCTGGAAACAGCATAGCAAGTTTAAATAAGGCTAGTCCGTTATCAACTTGAAAAAGTGGCACCGAGTCGGTGCTTTTTT
1|Neg_Control_Human_GA_0176|NegCtrl	TAAGATCCGCGGGTGGCAAC	3954	1588	2084	1264	1	731	1021	1339	0	1595	1439	893	1657	1810	2043	2484	2890	n/a	NegCtrl	NegCtrl|18	1|Neg_Control_Human_GA_0176|NegCtrl	NegCtrl	ACCGTAAGATCCGCGGGTGGCAACGTTTAAGAGCTATGCTGGAAACAGCATAGCAAGTTTAAATAAGGCTAGTCCGTTATCAACTTGAAAAAGTGGCACCGAGTCGGTGCTTTTTT
1|Neg_Control_Human_GA_0177|NegCtrl	GTAGACGTCGTGAGCTTCAC	0	1104	908	883	2146	366	1720	1130	0	0	899	493	0	4656	1016	1049	3041	n/a	NegCtrl	NegCtrl|18	1|Neg_Control_Human_GA_0177|NegCtrl	NegCtrl	ACCGGTAGACGTCGTGAGCTTCACGTTTAAGAGCTATGCTGGAAACAGCATAGCAAGTTTAAATAAGGCTAGTCCGTTATCAACTTGAAAAAGTGGCACCGAGTCGGTGCTTTTTT
1|Neg_Control_Human_GA_0178|NegCtrl	TCGCGGACATAGGGCTCTAA	1999	1178	877	811	0	266	799	621	0	0	1242	537	0	0	297	1435	2166	n/a	NegCtrl	NegCtrl|18	1|Neg_Control_Human_GA_0178|NegCtrl	NegCtrl	ACCGTCGCGGACATAGGGCTCTAAGTTTAAGAGCTATGCTGGAAACAGCATAGCAAGTTTAAATAAGGCTAGTCCGTTATCAACTTGAAAAAGTGGCACCGAGTCGGTGCTTTTTT
1|Neg_Control_Human_GA_0179|NegCtrl	AGCGCAGATAGCGCGTATCA	1	396	752	380	1808	0	288	540	0	0	559	753	1279	4617	1510	2067	2273	n/a	NegCtrl	NegCtrl|18	1|Neg_Control_Human_GA_0179|NegCtrl	NegCtrl	ACCGAGCGCAGATAGCGCGTATCAGTTTAAGAGCTATGCTGGAAACAGCATAGCAAGTTTAAATAAGGCTAGTCCGTTATCAACTTGAAAAAGTGGCACCGAGTCGGTGCTTTTTT
1|Neg_Control_Human_GA_0180|NegCtrl	GTTCGCTTCGTAACGAGGAA	0	1089	1389	1562	1840	415	336	684	0	3389	1248	776	1	2973	1372	2641	3330	n/a	NegCtrl	NegCtrl|18	1|Neg_Control_Human_GA_0180|NegCtrl	NegCtrl	ACCGGTTCGCTTCGTAACGAGGAAGTTTAAGAGCTATGCTGGAAACAGCATAGCAAGTTTAAATAAGGCTAGTCCGTTATCAACTTGAAAAAGTGGCACCGAGTCGGTGCTTTTTT
1|Neg_Control_Human_GA_0181|NegCtrl	GACCCCCGATAACTTTTGAC	0	2528	669	660	0	0	269	249	1	0	761	408	1962	1252	782	1395	1984	n/a	NegCtrl	NegCtrl|19	1|Neg_Control_Human_GA_0181|NegCtrl	NegCtrl	ACCGGACCCCCGATAACTTTTGACGTTTAAGAGCTATGCTGGAAACAGCATAGCAAGTTTAAATAAGGCTAGTCCGTTATCAACTTGAAAAAGTGGCACCGAGTCGGTGCTTTTTT
1|Neg_Control_Human_GA_0182|NegCtrl	ACGTCCATACTGTCGGCTAC	0	282	1130	921	1	369	1249	735	0	1648	684	629	3	3503	1003	1082	2387	n/a	NegCtrl	NegCtrl|19	1|Neg_Control_Human_GA_0182|NegCtrl	NegCtrl	ACCGACGTCCATACTGTCGGCTACGTTTAAGAGCTATGCTGGAAACAGCATAGCAAGTTTAAATAAGGCTAGTCCGTTATCAACTTGAAAAAGTGGCACCGAGTCGGTGCTTTTTT
1|Neg_Control_Human_GA_0183|NegCtrl	GTACCATTGCCGGCTCCCTA	7444	1184	2843	2101	3177	505	2008	1840	7	1759	3589	1295	1	0	1645	2285	5961	n/a	NegCtrl	NegCtrl|19	1|Neg_Control_Human_GA_0183|NegCtrl	NegCtrl	ACCGGTACCATTGCCGGCTCCCTAGTTTAAGAGCTATGCTGGAAACAGCATAGCAAGTTTAAATAAGGCTAGTCCGTTATCAACTTGAAAAAGTGGCACCGAGTCGGTGCTTTTTT
1|Neg_Control_Human_GA_0184|NegCtrl	TGGTTCCGTAGGTCGGTATA	2	2090	1736	1340	1	692	1103	1010	1	6000	1897	1244	1808	4137	1167	1635	3626	n/a	NegCtrl	NegCtrl|19	1|Neg_Control_Human_GA_0184|NegCtrl	NegCtrl	ACCGTGGTTCCGTAGGTCGGTATAGTTTAAGAGCTATGCTGGAAACAGCATAGCAAGTTTAAATAAGGCTAGTCCGTTATCAACTTGAAAAAGTGGCACCGAGTCGGTGCTTTTTT
1|Neg_Control_Human_GA_0185|NegCtrl	TCTGGCTTGACACGACCGTT	0	0	618	918	2826	194	1022	687	1	3468	613	425	1	946	1005	2431	3091	n/a	NegCtrl	NegCtrl|19	1|Neg_Control_Human_GA_0185|NegCtrl	NegCtrl	ACCGTCTGGCTTGACACGACCGTTGTTTAAGAGCTATGCTGGAAACAGCATAGCAAGTTTAAATAAGGCTAGTCCGTTATCAACTTGAAAAAGTGGCACCGAGTCGGTGCTTTTTT
1|Neg_Control_Human_GA_0186|NegCtrl	CGCTAGGTCCGGTAAGTGCG	0	0	858	691	0	391	613	300	0	3	1599	454	1	0	1126	1384	2891	n/a	NegCtrl	NegCtrl|19	1|Neg_Control_Human_GA_0186|NegCtrl	NegCtrl	ACCGCGCTAGGTCCGGTAAGTGCGGTTTAAGAGCTATGCTGGAAACAGCATAGCAAGTTTAAATAAGGCTAGTCCGTTATCAACTTGAAAAAGTGGCACCGAGTCGGTGCTTTTTT
1|Neg_Control_Human_GA_0187|NegCtrl	AGCACGTAATGTCCGTGGAT	1908	593	1204	945	0	1233	390	528	0	0	828	727	1	3628	1225	1478	2923	n/a	NegCtrl	NegCtrl|19	1|Neg_Control_Human_GA_0187|NegCtrl	NegCtrl	ACCGAGCACGTAATGTCCGTGGATGTTTAAGAGCTATGCTGGAAACAGCATAGCAAGTTTAAATAAGGCTAGTCCGTTATCAACTTGAAAAAGTGGCACCGAGTCGGTGCTTTTTT
1|Neg_Control_Human_GA_0188|NegCtrl	AAGGCGCGCGAATGTGGCAG	1915	2553	1452	1492	1946	1061	1760	1312	0	3475	1241	952	6537	1986	1896	2166	2924	n/a	NegCtrl	NegCtrl|19	1|Neg_Control_Human_GA_0188|NegCtrl	NegCtrl	ACCGAAGGCGCGCGAATGTGGCAGGTTTAAGAGCTATGCTGGAAACAGCATAGCAAGTTTAAATAAGGCTAGTCCGTTATCAACTTGAAAAAGTGGCACCGAGTCGGTGCTTTTTT
1|Neg_Control_Human_GA_0189|NegCtrl	ACTGCGGAGCGCCCAATATC	0	2248	1292	1196	2134	1094	327	955	1	2221	917	801	2217	1657	1774	1002	2901	n/a	NegCtrl	NegCtrl|19	1|Neg_Control_Human_GA_0189|NegCtrl	NegCtrl	ACCGACTGCGGAGCGCCCAATATCGTTTAAGAGCTATGCTGGAAACAGCATAGCAAGTTTAAATAAGGCTAGTCCGTTATCAACTTGAAAAAGTGGCACCGAGTCGGTGCTTTTTT
1|Neg_Control_Human_GA_0190|NegCtrl	CGTCGAGTGCTCGAACTCCA	0	2206	585	802	1755	1890	1237	958	0	0	822	825	1	1	1280	2901	2385	n/a	NegCtrl	NegCtrl|19	1|Neg_Control_Human_GA_0190|NegCtrl	NegCtrl	ACCGCGTCGAGTGCTCGAACTCCAGTTTAAGAGCTATGCTGGAAACAGCATAGCAAGTTTAAATAAGGCTAGTCCGTTATCAACTTGAAAAAGTGGCACCGAGTCGGTGCTTTTTT
1|Neg_Control_Human_GA_0191|NegCtrl	TCGCAGCGGCGTGGGATCGG	3285	2247	1719	1453	0	561	151	1062	0	0	863	786	1	3972	1937	2077	3521	n/a	NegCtrl	NegCtrl|20	1|Neg_Control_Human_GA_0191|NegCtrl	NegCtrl	ACCGTCGCAGCGGCGTGGGATCGGGTTTAAGAGCTATGCTGGAAACAGCATAGCAAGTTTAAATAAGGCTAGTCCGTTATCAACTTGAAAAAGTGGCACCGAGTCGGTGCTTTTTT
1|Neg_Control_Human_GA_0192|NegCtrl	ATCTGTCCTAATTCGGATCG	4418	1051	1402	1406	2	226	275	964	0	0	1299	730	1836	2276	1216	2227	3741	n/a	NegCtrl	NegCtrl|20	1|Neg_Control_Human_GA_0192|NegCtrl	NegCtrl	ACCGATCTGTCCTAATTCGGATCGGTTTAAGAGCTATGCTGGAAACAGCATAGCAAGTTTAAATAAGGCTAGTCCGTTATCAACTTGAAAAAGTGGCACCGAGTCGGTGCTTTTTT
1|Neg_Control_Human_GA_0193|NegCtrl	TGCGGCGTAATGCTTGAAAG	0	0	874	701	0	264	908	607	0	0	753	370	0	2432	511	690	1882	n/a	NegCtrl	NegCtrl|20	1|Neg_Control_Human_GA_0193|NegCtrl	NegCtrl	ACCGTGCGGCGTAATGCTTGAAAGGTTTAAGAGCTATGCTGGAAACAGCATAGCAAGTTTAAATAAGGCTAGTCCGTTATCAACTTGAAAAAGTGGCACCGAGTCGGTGCTTTTTT
1|Neg_Control_Human_GA_0194|NegCtrl	CGAACTTAATCCCGTGGCAA	1	569	878	813	1	275	720	636	0	0	1692	705	674	1681	1148	1193	2697	n/a	NegCtrl	NegCtrl|20	1|Neg_Control_Human_GA_0194|NegCtrl	NegCtrl	ACCGCGAACTTAATCCCGTGGCAAGTTTAAGAGCTATGCTGGAAACAGCATAGCAAGTTTAAATAAGGCTAGTCCGTTATCAACTTGAAAAAGTGGCACCGAGTCGGTGCTTTTTT
1|Neg_Control_Human_GA_0195|NegCtrl	GCCGTGTTGCTGGATACGCC	0	1283	1005	1131	1322	25	584	755	0	3158	1266	937	0	1361	1644	1331	3279	n/a	NegCtrl	NegCtrl|20	1|Neg_Control_Human_GA_0195|NegCtrl	NegCtrl	ACCGGCCGTGTTGCTGGATACGCCGTTTAAGAGCTATGCTGGAAACAGCATAGCAAGTTTAAATAAGGCTAGTCCGTTATCAACTTGAAAAAGTGGCACCGAGTCGGTGCTTTTTT
1|Neg_Control_Human_GA_0196|NegCtrl	TACCCTCCGGATACGGACTG	0	0	612	484	1	20	116	225	0	0	1107	227	1	1553	318	1217	1115	n/a	NegCtrl	NegCtrl|20	1|Neg_Control_Human_GA_0196|NegCtrl	NegCtrl	ACCGTACCCTCCGGATACGGACTGGTTTAAGAGCTATGCTGGAAACAGCATAGCAAGTTTAAATAAGGCTAGTCCGTTATCAACTTGAAAAAGTGGCACCGAGTCGGTGCTTTTTT
1|Neg_Control_Human_GA_0197|NegCtrl	CCGTTGGACTATGGCGGGTC	9351	1529	1169	1175	1127	666	699	1181	0	0	1253	854	2877	2346	829	738	3207	n/a	NegCtrl	NegCtrl|20	1|Neg_Control_Human_GA_0197|NegCtrl	NegCtrl	ACCGCCGTTGGACTATGGCGGGTCGTTTAAGAGCTATGCTGGAAACAGCATAGCAAGTTTAAATAAGGCTAGTCCGTTATCAACTTGAAAAAGTGGCACCGAGTCGGTGCTTTTTT
1|Neg_Control_Human_GA_0198|NegCtrl	GTACGGGGCGATCATCCACA	3214	620	965	826	4471	0	566	768	0	3038	881	489	0	812	1414	1813	2165	n/a	NegCtrl	NegCtrl|20	1|Neg_Control_Human_GA_0198|NegCtrl	NegCtrl	ACCGGTACGGGGCGATCATCCACAGTTTAAGAGCTATGCTGGAAACAGCATAGCAAGTTTAAATAAGGCTAGTCCGTTATCAACTTGAAAAAGTGGCACCGAGTCGGTGCTTTTTT
1|Neg_Control_Human_GA_0199|NegCtrl	AAGAGTAGTAGACGCCCGGG	0	1099	680	488	1	121	226	559	0	1	1288	766	0	0	825	1137	2093	n/a	NegCtrl	NegCtrl|20	1|Neg_Control_Human_GA_0199|NegCtrl	NegCtrl	ACCGAAGAGTAGTAGACGCCCGGGGTTTAAGAGCTATGCTGGAAACAGCATAGCAAGTTTAAATAAGGCTAGTCCGTTATCAACTTGAAAAAGTGGCACCGAGTCGGTGCTTTTTT
1|Neg_Control_Human_GA_0200|NegCtrl	AAGAGCGAATCGATTTCGTG	0	924	681	905	3	430	710	960	0	0	1328	581	1830	2	1573	1380	3098	n/a	NegCtrl	NegCtrl|20	1|Neg_Control_Human_GA_0200|NegCtrl	NegCtrl	ACCGAAGAGCGAATCGATTTCGTGGTTTAAGAGCTATGCTGGAAACAGCATAGCAAGTTTAAATAAGGCTAGTCCGTTATCAACTTGAAAAAGTGGCACCGAGTCGGTGCTTTTTT
1|Neg_Control_Human_GA_0201|NegCtrl	CGGCTCGTTCTACGCACTGA	1	2689	1270	622	1	793	885	639	0	0	2402	418	1	4638	1150	841	2443	n/a	NegCtrl	NegCtrl|21	1|Neg_Control_Human_GA_0201|NegCtrl	NegCtrl	ACCGCGGCTCGTTCTACGCACTGAGTTTAAGAGCTATGCTGGAAACAGCATAGCAAGTTTAAATAAGGCTAGTCCGTTATCAACTTGAAAAAGTGGCACCGAGTCGGTGCTTTTTT
1|Neg_Control_Human_GA_0202|NegCtrl	TCCAGCGCGAGCTTACTCGT	1	808	1175	983	4245	370	1209	1037	0	1946	729	692	2	0	1343	2716	2655	n/a	NegCtrl	NegCtrl|21	1|Neg_Control_Human_GA_0202|NegCtrl	NegCtrl	ACCGTCCAGCGCGAGCTTACTCGTGTTTAAGAGCTATGCTGGAAACAGCATAGCAAGTTTAAATAAGGCTAGTCCGTTATCAACTTGAAAAAGTGGCACCGAGTCGGTGCTTTTTT
1|Neg_Control_Human_GA_0203|NegCtrl	GGAGTGGTCCCGTACGCAAC	0	548	454	533	1055	193	76	341	0	0	760	289	5285	3	1202	719	1801	n/a	NegCtrl	NegCtrl|21	1|Neg_Control_Human_GA_0203|NegCtrl	NegCtrl	ACCGGGAGTGGTCCCGTACGCAACGTTTAAGAGCTATGCTGGAAACAGCATAGCAAGTTTAAATAAGGCTAGTCCGTTATCAACTTGAAAAAGTGGCACCGAGTCGGTGCTTTTTT
1|Neg_Control_Human_GA_0204|NegCtrl	CAAGACCTTATCGTGCAGCG	1328	427	1348	1137	0	619	869	938	2	7798	1501	729	3	0	1000	1914	4265	n/a	NegCtrl	NegCtrl|21	1|Neg_Control_Human_GA_0204|NegCtrl	NegCtrl	ACCGCAAGACCTTATCGTGCAGCGGTTTAAGAGCTATGCTGGAAACAGCATAGCAAGTTTAAATAAGGCTAGTCCGTTATCAACTTGAAAAAGTGGCACCGAGTCGGTGCTTTTTT
1|Neg_Control_Human_GA_0205|NegCtrl	ACGTCGTTTAGCACCCGGCT	1	677	1249	1420	1	976	936	1012	0	1466	1270	974	2232	2672	1628	3063	3921	n/a	NegCtrl	NegCtrl|21	1|Neg_Control_Human_GA_0205|NegCtrl	NegCtrl	ACCGACGTCGTTTAGCACCCGGCTGTTTAAGAGCTATGCTGGAAACAGCATAGCAAGTTTAAATAAGGCTAGTCCGTTATCAACTTGAAAAAGTGGCACCGAGTCGGTGCTTTTTT
1|Neg_Control_Human_GA_0206|NegCtrl	TTTCAGGCTACGGGCGCGGG	0	557	1463	1382	1	0	1389	1157	0	2000	1470	729	1	2552	1079	605	3034	n/a	NegCtrl	NegCtrl|21	1|Neg_Control_Human_GA_0206|NegCtrl	NegCtrl	ACCGTTTCAGGCTACGGGCGCGGGGTTTAAGAGCTATGCTGGAAACAGCATAGCAAGTTTAAATAAGGCTAGTCCGTTATCAACTTGAAAAAGTGGCACCGAGTCGGTGCTTTTTT
1|Neg_Control_Human_GA_0207|NegCtrl	CAATCGGCGACGTTTTAAAT	0	3574	1806	1503	5062	1312	396	1523	10300	1	2014	1139	5529	6	1161	2546	4252	n/a	NegCtrl	NegCtrl|21	1|Neg_Control_Human_GA_0207|NegCtrl	NegCtrl	ACCGCAATCGGCGACGTTTTAAATGTTTAAGAGCTATGCTGGAAACAGCATAGCAAGTTTAAATAAGGCTAGTCCGTTATCAACTTGAAAAAGTGGCACCGAGTCGGTGCTTTTTT
1|Neg_Control_Human_GA_0208|NegCtrl	GTACCCCTATGGCCGTTCTA	0	1295	2450	1956	1407	245	1699	1660	0	9	2592	787	1744	1782	2093	2517	5751	n/a	NegCtrl	NegCtrl|21	1|Neg_Control_Human_GA_0208|NegCtrl	NegCtrl	ACCGGTACCCCTATGGCCGTTCTAGTTTAAGAGCTATGCTGGAAACAGCATAGCAAGTTTAAATAAGGCTAGTCCGTTATCAACTTGAAAAAGTGGCACCGAGTCGGTGCTTTTTT
1|Neg_Control_Human_GA_0209|NegCtrl	TACCCACGCGTATTCCATCT	1	0	895	1251	1096	98	661	516	0	0	1915	741	1	1869	1589	1091	2649	n/a	NegCtrl	NegCtrl|21	1|Neg_Control_Human_GA_0209|NegCtrl	NegCtrl	ACCGTACCCACGCGTATTCCATCTGTTTAAGAGCTATGCTGGAAACAGCATAGCAAGTTTAAATAAGGCTAGTCCGTTATCAACTTGAAAAAGTGGCACCGAGTCGGTGCTTTTTT
1|Neg_Control_Human_GA_0210|NegCtrl	CTTGTTGCGTATACGAGACT	0	309	666	601	1183	522	753	665	0	0	806	399	2170	499	1026	1698	2191	n/a	NegCtrl	NegCtrl|21	1|Neg_Control_Human_GA_0210|NegCtrl	NegCtrl	ACCGCTTGTTGCGTATACGAGACTGTTTAAGAGCTATGCTGGAAACAGCATAGCAAGTTTAAATAAGGCTAGTCCGTTATCAACTTGAAAAAGTGGCACCGAGTCGGTGCTTTTTT
1|Neg_Control_Human_GA_0211|NegCtrl	GAACGCCGCTCAAGTTGATA	0	1486	1348	926	0	981	1109	1139	1	0	1101	531	1648	1870	1411	1146	3378	n/a	NegCtrl	NegCtrl|22	1|Neg_Control_Human_GA_0211|NegCtrl	NegCtrl	ACCGGAACGCCGCTCAAGTTGATAGTTTAAGAGCTATGCTGGAAACAGCATAGCAAGTTTAAATAAGGCTAGTCCGTTATCAACTTGAAAAAGTGGCACCGAGTCGGTGCTTTTTT
1|Neg_Control_Human_GA_0212|NegCtrl	CGCAGTACGTATAGACTTAA	0	1087	1015	837	2	1678	124	737	0	0	1787	624	1	1436	1250	1090	2712	n/a	NegCtrl	NegCtrl|22	1|Neg_Control_Human_GA_0212|NegCtrl	NegCtrl	ACCGCGCAGTACGTATAGACTTAAGTTTAAGAGCTATGCTGGAAACAGCATAGCAAGTTTAAATAAGGCTAGTCCGTTATCAACTTGAAAAAGTGGCACCGAGTCGGTGCTTTTTT
1|Neg_Control_Human_GA_0213|NegCtrl	GCGAACCCCGTAGCCAGGCT	1	586	1327	1095	1	331	258	1131	17533	1	1025	1234	1	1801	1804	1310	2497	n/a	NegCtrl	NegCtrl|22	1|Neg_Control_Human_GA_0213|NegCtrl	NegCtrl	ACCGGCGAACCCCGTAGCCAGGCTGTTTAAGAGCTATGCTGGAAACAGCATAGCAAGTTTAAATAAGGCTAGTCCGTTATCAACTTGAAAAAGTGGCACCGAGTCGGTGCTTTTTT
1|Neg_Control_Human_GA_0214|NegCtrl	CCTCGGGCGTAAATACTCAT	0	0	744	961	0	257	272	418	0	3591	1338	754	1606	0	1150	804	1865	n/a	NegCtrl	NegCtrl|22	1|Neg_Control_Human_GA_0214|NegCtrl	NegCtrl	ACCGCCTCGGGCGTAAATACTCATGTTTAAGAGCTATGCTGGAAACAGCATAGCAAGTTTAAATAAGGCTAGTCCGTTATCAACTTGAAAAAGTGGCACCGAGTCGGTGCTTTTTT
1|Neg_Control_Human_GA_0215|NegCtrl	AGGGCACCCGGTTCATACGC	1	2758	1862	1566	4	886	1232	1449	1	3663	2819	1518	1653	805	2260	2647	4668	n/a	NegCtrl	NegCtrl|22	1|Neg_Control_Human_GA_0215|NegCtrl	NegCtrl	ACCGAGGGCACCCGGTTCATACGCGTTTAAGAGCTATGCTGGAAACAGCATAGCAAGTTTAAATAAGGCTAGTCCGTTATCAACTTGAAAAAGTGGCACCGAGTCGGTGCTTTTTT
1|Neg_Control_Human_GA_0216|NegCtrl	CACGGCCTAACTTGCTGATA	1	346	861	880	1	436	1317	937	5322	0	1274	433	0	0	1414	1198	2421	n/a	NegCtrl	NegCtrl|22	1|Neg_Control_Human_GA_0216|NegCtrl	NegCtrl	ACCGCACGGCCTAACTTGCTGATAGTTTAAGAGCTATGCTGGAAACAGCATAGCAAGTTTAAATAAGGCTAGTCCGTTATCAACTTGAAAAAGTGGCACCGAGTCGGTGCTTTTTT
1|Neg_Control_Human_GA_0217|NegCtrl	CCGGGAGATTAACGTTAATT	2441	0	2037	1418	1	1043	706	1369	0	212	1502	1138	4	0	1656	1517	3350	n/a	NegCtrl	NegCtrl|22	1|Neg_Control_Human_GA_0217|NegCtrl	NegCtrl	ACCGCCGGGAGATTAACGTTAATTGTTTAAGAGCTATGCTGGAAACAGCATAGCAAGTTTAAATAAGGCTAGTCCGTTATCAACTTGAAAAAGTGGCACCGAGTCGGTGCTTTTTT
1|Neg_Control_Human_GA_0218|NegCtrl	ATCTCGGGTCGACTGCGGAT	0	0	1078	867	0	314	326	725	0	0	784	569	0	0	953	1715	2389	n/a	NegCtrl	NegCtrl|22	1|Neg_Control_Human_GA_0218|NegCtrl	NegCtrl	ACCGATCTCGGGTCGACTGCGGATGTTTAAGAGCTATGCTGGAAACAGCATAGCAAGTTTAAATAAGGCTAGTCCGTTATCAACTTGAAAAAGTGGCACCGAGTCGGTGCTTTTTT
1|Neg_Control_Human_GA_0219|NegCtrl	CGCCGGGACCGTTAGGGAAT	0	457	2634	1890	3462	912	1726	1812	0	0	2846	1161	9370	1368	2227	3493	5211	n/a	NegCtrl	NegCtrl|22	1|Neg_Control_Human_GA_0219|NegCtrl	NegCtrl	ACCGCGCCGGGACCGTTAGGGAATGTTTAAGAGCTATGCTGGAAACAGCATAGCAAGTTTAAATAAGGCTAGTCCGTTATCAACTTGAAAAAGTGGCACCGAGTCGGTGCTTTTTT
1|Neg_Control_Human_GA_0220|NegCtrl	GCAAACCCGAGTGACACGTC	1	1855	1294	1282	1560	238	1295	934	1	609	1639	1132	4	3309	1849	3275	3712	n/a	NegCtrl	NegCtrl|22	1|Neg_Control_Human_GA_0220|NegCtrl	NegCtrl	ACCGGCAAACCCGAGTGACACGTCGTTTAAGAGCTATGCTGGAAACAGCATAGCAAGTTTAAATAAGGCTAGTCCGTTATCAACTTGAAAAAGTGGCACCGAGTCGGTGCTTTTTT
1|Neg_Control_Human_GA_0221|NegCtrl	GTGCGTGAGTATTAACGCTC	6024	0	999	654	2	0	376	693	0	0	518	320	0	0	644	1032	2437	n/a	NegCtrl	NegCtrl|23	1|Neg_Control_Human_GA_0221|NegCtrl	NegCtrl	ACCGGTGCGTGAGTATTAACGCTCGTTTAAGAGCTATGCTGGAAACAGCATAGCAAGTTTAAATAAGGCTAGTCCGTTATCAACTTGAAAAAGTGGCACCGAGTCGGTGCTTTTTT
1|Neg_Control_Human_GA_0222|NegCtrl	GCTTAACCTATCCGCCAGTA	0	1	546	507	1	268	408	623	0	4855	1442	505	1	0	1000	2588	2128	n/a	NegCtrl	NegCtrl|23	1|Neg_Control_Human_GA_0222|NegCtrl	NegCtrl	ACCGGCTTAACCTATCCGCCAGTAGTTTAAGAGCTATGCTGGAAACAGCATAGCAAGTTTAAATAAGGCTAGTCCGTTATCAACTTGAAAAAGTGGCACCGAGTCGGTGCTTTTTT
1|Neg_Control_Human_GA_0223|NegCtrl	TGGCCACGAATTCCGCCGCC	1793	1731	2360	1856	4275	1776	2224	1302	1	8443	2355	1119	3465	2734	1771	2528	4829	n/a	NegCtrl	NegCtrl|23	1|Neg_Control_Human_GA_0223|NegCtrl	NegCtrl	ACCGTGGCCACGAATTCCGCCGCCGTTTAAGAGCTATGCTGGAAACAGCATAGCAAGTTTAAATAAGGCTAGTCCGTTATCAACTTGAAAAAGTGGCACCGAGTCGGTGCTTTTTT
1|Neg_Control_Human_GA_0224|NegCtrl	GTAAGGCCCGCGTACGAGCT	2854	4218	1084	795	0	0	419	527	0	1	791	494	4	2858	968	1675	2799	n/a	NegCtrl	NegCtrl|23	1|Neg_Control_Human_GA_0224|NegCtrl	NegCtrl	ACCGGTAAGGCCCGCGTACGAGCTGTTTAAGAGCTATGCTGGAAACAGCATAGCAAGTTTAAATAAGGCTAGTCCGTTATCAACTTGAAAAAGTGGCACCGAGTCGGTGCTTTTTT
1|Neg_Control_Human_GA_0225|NegCtrl	CTCCTTACGTCGGGCATTAA	0	1302	1454	705	1	285	481	1148	8968	3135	864	622	2934	1571	781	885	2647	n/a	NegCtrl	NegCtrl|23	1|Neg_Control_Human_GA_0225|NegCtrl	NegCtrl	ACCGCTCCTTACGTCGGGCATTAAGTTTAAGAGCTATGCTGGAAACAGCATAGCAAGTTTAAATAAGGCTAGTCCGTTATCAACTTGAAAAAGTGGCACCGAGTCGGTGCTTTTTT
1|Neg_Control_Human_GA_0226|NegCtrl	ATTCCTTCGGCGCTCTGCGT	0	2910	1651	1169	5	1291	1221	1549	0	2565	1796	694	1	2694	2225	2220	3661	n/a	NegCtrl	NegCtrl|23	1|Neg_Control_Human_GA_0226|NegCtrl	NegCtrl	ACCGATTCCTTCGGCGCTCTGCGTGTTTAAGAGCTATGCTGGAAACAGCATAGCAAGTTTAAATAAGGCTAGTCCGTTATCAACTTGAAAAAGTGGCACCGAGTCGGTGCTTTTTT
1|Neg_Control_Human_GA_0227|NegCtrl	ATGCGCTTTAATCGCCGTTC	1	1170	617	567	1741	49	710	385	0	0	391	246	1	1065	963	1383	2537	n/a	NegCtrl	NegCtrl|23	1|Neg_Control_Human_GA_0227|NegCtrl	NegCtrl	ACCGATGCGCTTTAATCGCCGTTCGTTTAAGAGCTATGCTGGAAACAGCATAGCAAGTTTAAATAAGGCTAGTCCGTTATCAACTTGAAAAAGTGGCACCGAGTCGGTGCTTTTTT
1|Neg_Control_Human_GA_0228|NegCtrl	TTAGCCCTCGATTGGTTGCG	7127	1978	1185	1316	2	908	969	717	0	930	1145	698	0	0	1121	1044	3160	n/a	NegCtrl	NegCtrl|23	1|Neg_Control_Human_GA_0228|NegCtrl	NegCtrl	ACCGTTAGCCCTCGATTGGTTGCGGTTTAAGAGCTATGCTGGAAACAGCATAGCAAGTTTAAATAAGGCTAGTCCGTTATCAACTTGAAAAAGTGGCACCGAGTCGGTGCTTTTTT
1|Neg_Control_Human_GA_0229|NegCtrl	AACGCTGTCGTACGTGTATA	0	2520	606	496	2530	1041	371	310	0	0	578	455	1	1278	779	2187	2377	n/a	NegCtrl	NegCtrl|23	1|Neg_Control_Human_GA_0229|NegCtrl	NegCtrl	ACCGAACGCTGTCGTACGTGTATAGTTTAAGAGCTATGCTGGAAACAGCATAGCAAGTTTAAATAAGGCTAGTCCGTTATCAACTTGAAAAAGTGGCACCGAGTCGGTGCTTTTTT
1|Neg_Control_Human_GA_0230|NegCtrl	TAACGCGCATATCTGAACAC	4000	3491	955	639	1	409	472	378	0	1563	674	818	0	1	1326	1072	2976	n/a	NegCtrl	NegCtrl|23	1|Neg_Control_Human_GA_0230|NegCtrl	NegCtrl	ACCGTAACGCGCATATCTGAACACGTTTAAGAGCTATGCTGGAAACAGCATAGCAAGTTTAAATAAGGCTAGTCCGTTATCAACTTGAAAAAGTGGCACCGAGTCGGTGCTTTTTT
1|Neg_Control_Human_GA_0231|NegCtrl	CGCTAGGTTATTTCGTGGCC	0	1429	1291	755	0	205	236	723	0	0	1111	1035	3231	2	893	1558	2905	n/a	NegCtrl	NegCtrl|24	1|Neg_Control_Human_GA_0231|NegCtrl	NegCtrl	ACCGCGCTAGGTTATTTCGTGGCCGTTTAAGAGCTATGCTGGAAACAGCATAGCAAGTTTAAATAAGGCTAGTCCGTTATCAACTTGAAAAAGTGGCACCGAGTCGGTGCTTTTTT
1|Neg_Control_Human_GA_0232|NegCtrl	AATATTTGGCTCGGCTGCGC	1	1479	844	648	1	651	865	920	0	0	1743	617	0	0	1039	929	3281	n/a	NegCtrl	NegCtrl|24	1|Neg_Control_Human_GA_0232|NegCtrl	NegCtrl	ACCGAATATTTGGCTCGGCTGCGCGTTTAAGAGCTATGCTGGAAACAGCATAGCAAGTTTAAATAAGGCTAGTCCGTTATCAACTTGAAAAAGTGGCACCGAGTCGGTGCTTTTTT
1|Neg_Control_Human_GA_0233|NegCtrl	CAATATCGGGTGCTACAGGA	0	1999	1035	846	1	0	978	613	0	0	869	581	3	0	909	574	2121	n/a	NegCtrl	NegCtrl|24	1|Neg_Control_Human_GA_0233|NegCtrl	NegCtrl	ACCGCAATATCGGGTGCTACAGGAGTTTAAGAGCTATGCTGGAAACAGCATAGCAAGTTTAAATAAGGCTAGTCCGTTATCAACTTGAAAAAGTGGCACCGAGTCGGTGCTTTTTT
1|Neg_Control_Human_GA_0234|NegCtrl	CGGCCGCATCCTGTTATATT	0	1754	2315	1829	2009	530	1032	1618	0	0	2283	1244	2241	1464	2209	2014	4879	n/a	NegCtrl	NegCtrl|24	1|Neg_Control_Human_GA_0234|NegCtrl	NegCtrl	ACCGCGGCCGCATCCTGTTATATTGTTTAAGAGCTATGCTGGAAACAGCATAGCAAGTTTAAATAAGGCTAGTCCGTTATCAACTTGAAAAAGTGGCACCGAGTCGGTGCTTTTTT
1|Neg_Control_Human_GA_0235|NegCtrl	CTGGATCGCCCGCAGAAATA	0	0	1544	771	3	1024	26	1200	0	0	1161	1037	0	2619	1230	1249	2173	n/a	NegCtrl	NegCtrl|24	1|Neg_Control_Human_GA_0235|NegCtrl	NegCtrl	ACCGCTGGATCGCCCGCAGAAATAGTTTAAGAGCTATGCTGGAAACAGCATAGCAAGTTTAAATAAGGCTAGTCCGTTATCAACTTGAAAAAGTGGCACCGAGTCGGTGCTTTTTT
1|Neg_Control_Human_GA_0236|NegCtrl	ATTAGCACGGCGACCTTCTA	1940	2687	2453	2076	0	774	1242	1307	0	2	2688	1469	1460	1264	2063	1748	6241	n/a	NegCtrl	NegCtrl|24	1|Neg_Control_Human_GA_0236|NegCtrl	NegCtrl	ACCGATTAGCACGGCGACCTTCTAGTTTAAGAGCTATGCTGGAAACAGCATAGCAAGTTTAAATAAGGCTAGTCCGTTATCAACTTGAAAAAGTGGCACCGAGTCGGTGCTTTTTT
1|Neg_Control_Human_GA_0237|NegCtrl	TGGAAATCGACTGTGCGCTT	1	822	1158	1107	1	1030	960	1158	0	3108	1163	289	0	1433	1127	706	3023	n/a	NegCtrl	NegCtrl|24	1|Neg_Control_Human_GA_0237|NegCtrl	NegCtrl	ACCGTGGAAATCGACTGTGCGCTTGTTTAAGAGCTATGCTGGAAACAGCATAGCAAGTTTAAATAAGGCTAGTCCGTTATCAACTTGAAAAAGTGGCACCGAGTCGGTGCTTTTTT
1|Neg_Control_Human_GA_0238|NegCtrl	ATTAGCCGTTGCCATATCAA	0	309	912	499	0	1	343	660	0	1184	613	912	0	0	762	1091	2399	n/a	NegCtrl	NegCtrl|24	1|Neg_Control_Human_GA_0238|NegCtrl	NegCtrl	ACCGATTAGCCGTTGCCATATCAAGTTTAAGAGCTATGCTGGAAACAGCATAGCAAGTTTAAATAAGGCTAGTCCGTTATCAACTTGAAAAAGTGGCACCGAGTCGGTGCTTTTTT
1|Neg_Control_Human_GA_0239|NegCtrl	ACCCGATAATAGCTACTGGT	0	849	1716	1234	3	585	1289	967	0	2018	2487	1621	1	1174	2175	2123	4189	n/a	NegCtrl	NegCtrl|24	1|Neg_Control_Human_GA_0239|NegCtrl	NegCtrl	ACCGACCCGATAATAGCTACTGGTGTTTAAGAGCTATGCTGGAAACAGCATAGCAAGTTTAAATAAGGCTAGTCCGTTATCAACTTGAAAAAGTGGCACCGAGTCGGTGCTTTTTT
1|Neg_Control_Human_GA_0240|NegCtrl	ATTCAGCGCGCTCGCCCTGG	0	2956	1062	961	3	252	257	891	0	2133	1479	570	2	1355	1123	1238	2288	n/a	NegCtrl	NegCtrl|24	1|Neg_Control_Human_GA_0240|NegCtrl	NegCtrl	ACCGATTCAGCGCGCTCGCCCTGGGTTTAAGAGCTATGCTGGAAACAGCATAGCAAGTTTAAATAAGGCTAGTCCGTTATCAACTTGAAAAAGTGGCACCGAGTCGGTGCTTTTTT
1|Neg_Control_Human_GA_0241|NegCtrl	TGCCGTGAAAAGACGCTGCG	1941	999	2257	1959	6	2241	2180	1562	14230	4601	1845	1285	3123	4	2930	4408	5787	n/a	NegCtrl	NegCtrl|25	1|Neg_Control_Human_GA_0241|NegCtrl	NegCtrl	ACCGTGCCGTGAAAAGACGCTGCGGTTTAAGAGCTATGCTGGAAACAGCATAGCAAGTTTAAATAAGGCTAGTCCGTTATCAACTTGAAAAAGTGGCACCGAGTCGGTGCTTTTTT
1|Neg_Control_Human_GA_0242|NegCtrl	CTTACGCGCCTGGTCAAAAG	0	783	476	673	1171	0	306	355	0	0	469	552	2	1224	644	555	1408	n/a	NegCtrl	NegCtrl|25	1|Neg_Control_Human_GA_0242|NegCtrl	NegCtrl	ACCGCTTACGCGCCTGGTCAAAAGGTTTAAGAGCTATGCTGGAAACAGCATAGCAAGTTTAAATAAGGCTAGTCCGTTATCAACTTGAAAAAGTGGCACCGAGTCGGTGCTTTTTT
1|Neg_Control_Human_GA_0243|NegCtrl	CGCATAAGTCGATAGACACA	0	0	867	970	0	269	383	551	1	2329	1153	773	1	1	1433	1325	2653	n/a	NegCtrl	NegCtrl|25	1|Neg_Control_Human_GA_0243|NegCtrl	NegCtrl	ACCGCGCATAAGTCGATAGACACAGTTTAAGAGCTATGCTGGAAACAGCATAGCAAGTTTAAATAAGGCTAGTCCGTTATCAACTTGAAAAAGTGGCACCGAGTCGGTGCTTTTTT
1|Neg_Control_Human_GA_0244|NegCtrl	GTCATCAGCGATTTGACGAG	2113	1104	1206	1207	0	984	1341	1394	1	3229	1267	667	2541	1	1174	2701	2790	n/a	NegCtrl	NegCtrl|25	1|Neg_Control_Human_GA_0244|NegCtrl	NegCtrl	ACCGGTCATCAGCGATTTGACGAGGTTTAAGAGCTATGCTGGAAACAGCATAGCAAGTTTAAATAAGGCTAGTCCGTTATCAACTTGAAAAAGTGGCACCGAGTCGGTGCTTTTTT
1|Neg_Control_Human_GA_0245|NegCtrl	CGAATCGGAACTTTGTACCG	0	666	808	827	0	766	1109	799	10315	1	1055	284	1684	106	431	461	2453	n/a	NegCtrl	NegCtrl|25	1|Neg_Control_Human_GA_0245|NegCtrl	NegCtrl	ACCGCGAATCGGAACTTTGTACCGGTTTAAGAGCTATGCTGGAAACAGCATAGCAAGTTTAAATAAGGCTAGTCCGTTATCAACTTGAAAAAGTGGCACCGAGTCGGTGCTTTTTT
1|Neg_Control_Human_GA_0246|NegCtrl	AGGTCAAGCCGACCTCGAAC	0	0	381	283	1	532	1	578	0	0	786	250	1	1932	474	776	1156	n/a	NegCtrl	NegCtrl|25	1|Neg_Control_Human_GA_0246|NegCtrl	NegCtrl	ACCGAGGTCAAGCCGACCTCGAACGTTTAAGAGCTATGCTGGAAACAGCATAGCAAGTTTAAATAAGGCTAGTCCGTTATCAACTTGAAAAAGTGGCACCGAGTCGGTGCTTTTTT
1|Neg_Control_Human_GA_0247|NegCtrl	TGCGCCTTACTCGTTAACTG	0	0	1190	1051	2	0	853	916	0	0	1027	656	0	1056	781	1371	2836	n/a	NegCtrl	NegCtrl|25	1|Neg_Control_Human_GA_0247|NegCtrl	NegCtrl	ACCGTGCGCCTTACTCGTTAACTGGTTTAAGAGCTATGCTGGAAACAGCATAGCAAGTTTAAATAAGGCTAGTCCGTTATCAACTTGAAAAAGTGGCACCGAGTCGGTGCTTTTTT
1|Neg_Control_Human_GA_0248|NegCtrl	ATCTGAGCGTTTTCGGCCGC	0	764	1398	1189	2	370	1378	686	0	2486	1348	1202	0	3668	1302	1301	3475	n/a	NegCtrl	NegCtrl|25	1|Neg_Control_Human_GA_0248|NegCtrl	NegCtrl	ACCGATCTGAGCGTTTTCGGCCGCGTTTAAGAGCTATGCTGGAAACAGCATAGCAAGTTTAAATAAGGCTAGTCCGTTATCAACTTGAAAAAGTGGCACCGAGTCGGTGCTTTTTT
1|Neg_Control_Human_GA_0249|NegCtrl	ACGGTACATGCGCATGAGTC	1923	3003	1035	906	1221	603	818	464	1	0	802	796	0	2021	1267	1002	2209	n/a	NegCtrl	NegCtrl|25	1|Neg_Control_Human_GA_0249|NegCtrl	NegCtrl	ACCGACGGTACATGCGCATGAGTCGTTTAAGAGCTATGCTGGAAACAGCATAGCAAGTTTAAATAAGGCTAGTCCGTTATCAACTTGAAAAAGTGGCACCGAGTCGGTGCTTTTTT
1|Neg_Control_Human_GA_0250|NegCtrl	TGACGCGATAGAGTTGGCTT	2096	1217	1210	1204	1817	327	1080	1218	0	0	763	233	1	1744	662	1231	2543	n/a	NegCtrl	NegCtrl|25	1|Neg_Control_Human_GA_0250|NegCtrl	NegCtrl	ACCGTGACGCGATAGAGTTGGCTTGTTTAAGAGCTATGCTGGAAACAGCATAGCAAGTTTAAATAAGGCTAGTCCGTTATCAACTTGAAAAAGTGGCACCGAGTCGGTGCTTTTTT
1|Neg_Control_Human_GA_0251|NegCtrl	TTCACCGTCCACGTGCGCAT	1	4548	1596	1571	1854	327	600	1250	0	856	1375	1533	1	1377	1207	1581	4239	n/a	NegCtrl	NegCtrl|26	1|Neg_Control_Human_GA_0251|NegCtrl	NegCtrl	ACCGTTCACCGTCCACGTGCGCATGTTTAAGAGCTATGCTGGAAACAGCATAGCAAGTTTAAATAAGGCTAGTCCGTTATCAACTTGAAAAAGTGGCACCGAGTCGGTGCTTTTTT
1|Neg_Control_Human_GA_0252|NegCtrl	TTCTTCGGCCTACACCCGGT	5238	2262	2723	2043	3	767	2137	2206	0	1	2980	1494	2494	2686	2250	4006	6034	n/a	NegCtrl	NegCtrl|26	1|Neg_Control_Human_GA_0252|NegCtrl	NegCtrl	ACCGTTCTTCGGCCTACACCCGGTGTTTAAGAGCTATGCTGGAAACAGCATAGCAAGTTTAAATAAGGCTAGTCCGTTATCAACTTGAAAAAGTGGCACCGAGTCGGTGCTTTTTT
1|Neg_Control_Human_GA_0253|NegCtrl	GGAATTACGACTAACCGATT	0	1539	861	836	3	741	681	1159	0	0	1071	581	1277	874	1727	2193	2830	n/a	NegCtrl	NegCtrl|26	1|Neg_Control_Human_GA_0253|NegCtrl	NegCtrl	ACCGGGAATTACGACTAACCGATTGTTTAAGAGCTATGCTGGAAACAGCATAGCAAGTTTAAATAAGGCTAGTCCGTTATCAACTTGAAAAAGTGGCACCGAGTCGGTGCTTTTTT
1|Neg_Control_Human_GA_0254|NegCtrl	TGCGGGGAGCTCTCTTAATG	0	945	1322	1469	1	758	639	583	0	1737	1550	708	0	753	1866	1580	2768	n/a	NegCtrl	NegCtrl|26	1|Neg_Control_Human_GA_0254|NegCtrl	NegCtrl	ACCGTGCGGGGAGCTCTCTTAATGGTTTAAGAGCTATGCTGGAAACAGCATAGCAAGTTTAAATAAGGCTAGTCCGTTATCAACTTGAAAAAGTGGCACCGAGTCGGTGCTTTTTT
1|Neg_Control_Human_GA_0255|NegCtrl	TAGAGATATCCGATCGTGGT	0	480	849	951	1	462	649	647	0	0	928	724	2521	2092	1397	1751	2664	n/a	NegCtrl	NegCtrl|26	1|Neg_Control_Human_GA_0255|NegCtrl	NegCtrl	ACCGTAGAGATATCCGATCGTGGTGTTTAAGAGCTATGCTGGAAACAGCATAGCAAGTTTAAATAAGGCTAGTCCGTTATCAACTTGAAAAAGTGGCACCGAGTCGGTGCTTTTTT
1|Neg_Control_Human_GA_0256|NegCtrl	GGGTGCCCACTAATAGCCGC	0	3211	727	837	2	359	762	750	10962	0	948	927	2114	2641	1056	1932	2534	n/a	NegCtrl	NegCtrl|26	1|Neg_Control_Human_GA_0256|NegCtrl	NegCtrl	ACCGGGGTGCCCACTAATAGCCGCGTTTAAGAGCTATGCTGGAAACAGCATAGCAAGTTTAAATAAGGCTAGTCCGTTATCAACTTGAAAAAGTGGCACCGAGTCGGTGCTTTTTT
1|Neg_Control_Human_GA_0257|NegCtrl	TGCAGTCGCGCTGAGCGTCA	0	1275	1520	1743	0	863	770	814	0	0	993	1028	0	3096	789	2178	3561	n/a	NegCtrl	NegCtrl|26	1|Neg_Control_Human_GA_0257|NegCtrl	NegCtrl	ACCGTGCAGTCGCGCTGAGCGTCAGTTTAAGAGCTATGCTGGAAACAGCATAGCAAGTTTAAATAAGGCTAGTCCGTTATCAACTTGAAAAAGTGGCACCGAGTCGGTGCTTTTTT
1|Neg_Control_Human_GA_0258|NegCtrl	GGATTGAATGGCTAACGCGG	0	6692	3127	2586	2	1741	2140	2863	15333	7953	3642	1619	1536	4566	3084	3777	6059	n/a	NegCtrl	NegCtrl|26	1|Neg_Control_Human_GA_0258|NegCtrl	NegCtrl	ACCGGGATTGAATGGCTAACGCGGGTTTAAGAGCTATGCTGGAAACAGCATAGCAAGTTTAAATAAGGCTAGTCCGTTATCAACTTGAAAAAGTGGCACCGAGTCGGTGCTTTTTT
1|Neg_Control_Human_GA_0259|NegCtrl	GCGGTTCCGGGAGCACATTT	0	2088	1670	1483	4	1147	1934	1087	0	650	1535	1090	1	0	1317	2533	3944	n/a	NegCtrl	NegCtrl|26	1|Neg_Control_Human_GA_0259|NegCtrl	NegCtrl	ACCGGCGGTTCCGGGAGCACATTTGTTTAAGAGCTATGCTGGAAACAGCATAGCAAGTTTAAATAAGGCTAGTCCGTTATCAACTTGAAAAAGTGGCACCGAGTCGGTGCTTTTTT
1|Neg_Control_Human_GA_0260|NegCtrl	GGCGCATTAAAGTCGAGAGC	0	533	1485	917	1	808	434	979	0	1	940	999	1	1011	1315	1316	3335	n/a	NegCtrl	NegCtrl|26	1|Neg_Control_Human_GA_0260|NegCtrl	NegCtrl	ACCGGGCGCATTAAAGTCGAGAGCGTTTAAGAGCTATGCTGGAAACAGCATAGCAAGTTTAAATAAGGCTAGTCCGTTATCAACTTGAAAAAGTGGCACCGAGTCGGTGCTTTTTT
1|Neg_Control_Human_GA_0261|NegCtrl	GACGTAGCCTTCCGAAATAT	0	640	551	686	0	202	590	504	0	2916	688	984	1	1814	1350	1341	2243	n/a	NegCtrl	NegCtrl|27	1|Neg_Control_Human_GA_0261|NegCtrl	NegCtrl	ACCGGACGTAGCCTTCCGAAATATGTTTAAGAGCTATGCTGGAAACAGCATAGCAAGTTTAAATAAGGCTAGTCCGTTATCAACTTGAAAAAGTGGCACCGAGTCGGTGCTTTTTT
1|Neg_Control_Human_GA_0262|NegCtrl	TGAAGTGGGGCGTCGGACAC	4090	398	1221	1222	1577	1160	984	1537	0	1	1566	696	2	1930	966	1704	3175	n/a	NegCtrl	NegCtrl|27	1|Neg_Control_Human_GA_0262|NegCtrl	NegCtrl	ACCGTGAAGTGGGGCGTCGGACACGTTTAAGAGCTATGCTGGAAACAGCATAGCAAGTTTAAATAAGGCTAGTCCGTTATCAACTTGAAAAAGTGGCACCGAGTCGGTGCTTTTTT
1|Neg_Control_Human_GA_0263|NegCtrl	CTATATTGTCGCGCAGTGGA	0	2780	1454	1326	0	173	1020	598	0	0	1673	998	2741	3602	1220	2096	4665	n/a	NegCtrl	NegCtrl|27	1|Neg_Control_Human_GA_0263|NegCtrl	NegCtrl	ACCGCTATATTGTCGCGCAGTGGAGTTTAAGAGCTATGCTGGAAACAGCATAGCAAGTTTAAATAAGGCTAGTCCGTTATCAACTTGAAAAAGTGGCACCGAGTCGGTGCTTTTTT
1|Neg_Control_Human_GA_0264|NegCtrl	CGGCTTTGTTGCCCGTAAGC	6200	2515	1225	908	0	1105	788	476	0	0	1618	531	2738	1	964	1328	2591	n/a	NegCtrl	NegCtrl|27	1|Neg_Control_Human_GA_0264|NegCtrl	NegCtrl	ACCGCGGCTTTGTTGCCCGTAAGCGTTTAAGAGCTATGCTGGAAACAGCATAGCAAGTTTAAATAAGGCTAGTCCGTTATCAACTTGAAAAAGTGGCACCGAGTCGGTGCTTTTTT
1|Neg_Control_Human_GA_0265|NegCtrl	TCCCGGTTGGTGAACGATAC	0	1776	1165	692	1	1322	1422	694	0	16	955	450	0	1372	1114	1301	2460	n/a	NegCtrl	NegCtrl|27	1|Neg_Control_Human_GA_0265|NegCtrl	NegCtrl	ACCGTCCCGGTTGGTGAACGATACGTTTAAGAGCTATGCTGGAAACAGCATAGCAAGTTTAAATAAGGCTAGTCCGTTATCAACTTGAAAAAGTGGCACCGAGTCGGTGCTTTTTT
1|Neg_Control_Human_GA_0266|NegCtrl	TTAACTCGAACGCTCGAAAG	2397	694	1003	662	0	306	578	529	0	1947	1054	574	2	1374	1011	1356	2150	n/a	NegCtrl	NegCtrl|27	1|Neg_Control_Human_GA_0266|NegCtrl	NegCtrl	ACCGTTAACTCGAACGCTCGAAAGGTTTAAGAGCTATGCTGGAAACAGCATAGCAAGTTTAAATAAGGCTAGTCCGTTATCAACTTGAAAAAGTGGCACCGAGTCGGTGCTTTTTT
1|Neg_Control_Human_GA_0267|NegCtrl	GGACTATCCACCGTTTACTC	0	0	739	764	1	286	620	589	10720	0	1230	352	0	0	644	976	2474	n/a	NegCtrl	NegCtrl|27	1|Neg_Control_Human_GA_0267|NegCtrl	NegCtrl	ACCGGGACTATCCACCGTTTACTCGTTTAAGAGCTATGCTGGAAACAGCATAGCAAGTTTAAATAAGGCTAGTCCGTTATCAACTTGAAAAAGTGGCACCGAGTCGGTGCTTTTTT
1|Neg_Control_Human_GA_0268|NegCtrl	CAGTAGCGATCGAATGTCAA	2632	1420	1260	924	2	367	711	807	0	1936	1691	1212	2703	2190	2567	2362	3832	n/a	NegCtrl	NegCtrl|27	1|Neg_Control_Human_GA_0268|NegCtrl	NegCtrl	ACCGCAGTAGCGATCGAATGTCAAGTTTAAGAGCTATGCTGGAAACAGCATAGCAAGTTTAAATAAGGCTAGTCCGTTATCAACTTGAAAAAGTGGCACCGAGTCGGTGCTTTTTT
1|Neg_Control_Human_GA_0269|NegCtrl	TAGGCGCCCGTAGCATTGGA	0	967	968	462	1416	385	475	934	0	0	700	221	1474	1981	982	791	1959	n/a	NegCtrl	NegCtrl|27	1|Neg_Control_Human_GA_0269|NegCtrl	NegCtrl	ACCGTAGGCGCCCGTAGCATTGGAGTTTAAGAGCTATGCTGGAAACAGCATAGCAAGTTTAAATAAGGCTAGTCCGTTATCAACTTGAAAAAGTGGCACCGAGTCGGTGCTTTTTT
1|Neg_Control_Human_GA_0270|NegCtrl	GCGGCGTCTGGGAATCGTTC	0	427	898	970	1	1021	1156	510	15583	0	1160	363	0	0	437	759	2559	n/a	NegCtrl	NegCtrl|27	1|Neg_Control_Human_GA_0270|NegCtrl	NegCtrl	ACCGGCGGCGTCTGGGAATCGTTCGTTTAAGAGCTATGCTGGAAACAGCATAGCAAGTTTAAATAAGGCTAGTCCGTTATCAACTTGAAAAAGTGGCACCGAGTCGGTGCTTTTTT
1|Neg_Control_Human_GA_0271|NegCtrl	CAGTGTCCGAGCGATATTTT	2132	0	1670	1411	2	1489	1093	891	0	4240	1880	846	6731	3413	1144	2294	3689	n/a	NegCtrl	NegCtrl|28	1|Neg_Control_Human_GA_0271|NegCtrl	NegCtrl	ACCGCAGTGTCCGAGCGATATTTTGTTTAAGAGCTATGCTGGAAACAGCATAGCAAGTTTAAATAAGGCTAGTCCGTTATCAACTTGAAAAAGTGGCACCGAGTCGGTGCTTTTTT
1|Neg_Control_Human_GA_0272|NegCtrl	TTCAATCACCTCACGGTAAG	2051	1532	1589	1145	1	549	1454	1023	0	6829	1376	1282	2671	3899	1244	1504	3181	n/a	NegCtrl	NegCtrl|28	1|Neg_Control_Human_GA_0272|NegCtrl	NegCtrl	ACCGTTCAATCACCTCACGGTAAGGTTTAAGAGCTATGCTGGAAACAGCATAGCAAGTTTAAATAAGGCTAGTCCGTTATCAACTTGAAAAAGTGGCACCGAGTCGGTGCTTTTTT
1|Neg_Control_Human_GA_0273|NegCtrl	CGGTTTACATCTGCCCATCG	2749	4448	2849	2577	6049	869	2341	2145	0	1354	3132	1692	3776	315	3294	3429	6965	n/a	NegCtrl	NegCtrl|28	1|Neg_Control_Human_GA_0273|NegCtrl	NegCtrl	ACCGCGGTTTACATCTGCCCATCGGTTTAAGAGCTATGCTGGAAACAGCATAGCAAGTTTAAATAAGGCTAGTCCGTTATCAACTTGAAAAAGTGGCACCGAGTCGGTGCTTTTTT
1|Neg_Control_Human_GA_0274|NegCtrl	GGGCGTGTATGTTCGTATTG	3	480	473	397	0	655	662	577	0	1	793	257	266	0	97	63	1946	n/a	NegCtrl	NegCtrl|28	1|Neg_Control_Human_GA_0274|NegCtrl	NegCtrl	ACCGGGGCGTGTATGTTCGTATTGGTTTAAGAGCTATGCTGGAAACAGCATAGCAAGTTTAAATAAGGCTAGTCCGTTATCAACTTGAAAAAGTGGCACCGAGTCGGTGCTTTTTT
1|Neg_Control_Human_GA_0275|NegCtrl	GCGGCGTCATCCACGCGTGC	779	1894	794	1041	1	1166	475	632	0	6137	1187	888	9	0	721	2401	2619	n/a	NegCtrl	NegCtrl|28	1|Neg_Control_Human_GA_0275|NegCtrl	NegCtrl	ACCGGCGGCGTCATCCACGCGTGCGTTTAAGAGCTATGCTGGAAACAGCATAGCAAGTTTAAATAAGGCTAGTCCGTTATCAACTTGAAAAAGTGGCACCGAGTCGGTGCTTTTTT
1|Neg_Control_Human_GA_0276|NegCtrl	GGGTATAGACGCGATCCTCA	4801	1835	2271	1513	1726	724	1856	1505	0	1442	1730	1026	2475	2874	2061	2149	5349	n/a	NegCtrl	NegCtrl|28	1|Neg_Control_Human_GA_0276|NegCtrl	NegCtrl	ACCGGGGTATAGACGCGATCCTCAGTTTAAGAGCTATGCTGGAAACAGCATAGCAAGTTTAAATAAGGCTAGTCCGTTATCAACTTGAAAAAGTGGCACCGAGTCGGTGCTTTTTT
1|Neg_Control_Human_GA_0277|NegCtrl	ACAGCGCTCTCGTGTACTAT	0	2047	2896	1917	3031	1292	2500	1968	0	1366	3161	1831	5695	2	1867	2990	5579	n/a	NegCtrl	NegCtrl|28	1|Neg_Control_Human_GA_0277|NegCtrl	NegCtrl	ACCGACAGCGCTCTCGTGTACTATGTTTAAGAGCTATGCTGGAAACAGCATAGCAAGTTTAAATAAGGCTAGTCCGTTATCAACTTGAAAAAGTGGCACCGAGTCGGTGCTTTTTT
1|Neg_Control_Human_GA_0278|NegCtrl	ACTAGCCTGTTCGCGAGTAG	0	505	479	494	1	0	2	330	0	0	317	386	0	1224	896	956	2461	n/a	NegCtrl	NegCtrl|28	1|Neg_Control_Human_GA_0278|NegCtrl	NegCtrl	ACCGACTAGCCTGTTCGCGAGTAGGTTTAAGAGCTATGCTGGAAACAGCATAGCAAGTTTAAATAAGGCTAGTCCGTTATCAACTTGAAAAAGTGGCACCGAGTCGGTGCTTTTTT
1|Neg_Control_Human_GA_0279|NegCtrl	GACCGCGTGAGATAACGTCA	3408	1228	1257	926	1	210	1191	877	0	0	2183	922	2525	3	1104	1376	3312	n/a	NegCtrl	NegCtrl|28	1|Neg_Control_Human_GA_0279|NegCtrl	NegCtrl	ACCGGACCGCGTGAGATAACGTCAGTTTAAGAGCTATGCTGGAAACAGCATAGCAAGTTTAAATAAGGCTAGTCCGTTATCAACTTGAAAAAGTGGCACCGAGTCGGTGCTTTTTT
1|Neg_Control_Human_GA_0280|NegCtrl	CGCGTGCATCTGCCGAAGGC	0	2654	1628	1177	2	750	1379	1588	0	2	2611	1034	1344	0	1319	1874	4097	n/a	NegCtrl	NegCtrl|28	1|Neg_Control_Human_GA_0280|NegCtrl	NegCtrl	ACCGCGCGTGCATCTGCCGAAGGCGTTTAAGAGCTATGCTGGAAACAGCATAGCAAGTTTAAATAAGGCTAGTCCGTTATCAACTTGAAAAAGTGGCACCGAGTCGGTGCTTTTTT
1|Neg_Control_Human_GA_0281|NegCtrl	AAAACATCGACCGAAAGCGT	0	0	1744	1042	1839	878	1262	701	0	1	953	794	1	0	1150	1521	3193	n/a	NegCtrl	NegCtrl|29	1|Neg_Control_Human_GA_0281|NegCtrl	NegCtrl	ACCGAAAACATCGACCGAAAGCGTGTTTAAGAGCTATGCTGGAAACAGCATAGCAAGTTTAAATAAGGCTAGTCCGTTATCAACTTGAAAAAGTGGCACCGAGTCGGTGCTTTTTT
1|Neg_Control_Human_GA_0282|NegCtrl	ACACCGAAGCACCTGTACGT	1	579	1166	1080	2	334	356	513	1	3880	1698	891	0	1599	1007	1442	2620	n/a	NegCtrl	NegCtrl|29	1|Neg_Control_Human_GA_0282|NegCtrl	NegCtrl	ACCGACACCGAAGCACCTGTACGTGTTTAAGAGCTATGCTGGAAACAGCATAGCAAGTTTAAATAAGGCTAGTCCGTTATCAACTTGAAAAAGTGGCACCGAGTCGGTGCTTTTTT
1|Neg_Control_Human_GA_0283|NegCtrl	GGGTCGAGGACTAATAGATT	4994	795	1851	1531	1023	1058	1564	1433	0	1760	1599	703	3442	2144	1081	2766	4230	n/a	NegCtrl	NegCtrl|29	1|Neg_Control_Human_GA_0283|NegCtrl	NegCtrl	ACCGGGGTCGAGGACTAATAGATTGTTTAAGAGCTATGCTGGAAACAGCATAGCAAGTTTAAATAAGGCTAGTCCGTTATCAACTTGAAAAAGTGGCACCGAGTCGGTGCTTTTTT
1|Neg_Control_Human_GA_0284|NegCtrl	ACGCCTCCTCAAATTAGCTC	0	2070	1024	499	0	345	268	399	0	0	1036	566	3423	1852	1203	1224	1418	n/a	NegCtrl	NegCtrl|29	1|Neg_Control_Human_GA_0284|NegCtrl	NegCtrl	ACCGACGCCTCCTCAAATTAGCTCGTTTAAGAGCTATGCTGGAAACAGCATAGCAAGTTTAAATAAGGCTAGTCCGTTATCAACTTGAAAAAGTGGCACCGAGTCGGTGCTTTTTT
1|Neg_Control_Human_GA_0285|NegCtrl	CCTACGCGGTAGGGAACTTT	2397	0	1127	656	0	1284	518	445	0	4705	1293	322	1	0	731	983	1743	n/a	NegCtrl	NegCtrl|29	1|Neg_Control_Human_GA_0285|NegCtrl	NegCtrl	ACCGCCTACGCGGTAGGGAACTTTGTTTAAGAGCTATGCTGGAAACAGCATAGCAAGTTTAAATAAGGCTAGTCCGTTATCAACTTGAAAAAGTGGCACCGAGTCGGTGCTTTTTT
1|Neg_Control_Human_GA_0286|NegCtrl	AAGCACTAGTCCGTATGATG	0	0	1277	1139	1546	1051	284	549	0	3225	1218	767	1	0	810	636	2401	n/a	NegCtrl	NegCtrl|29	1|Neg_Control_Human_GA_0286|NegCtrl	NegCtrl	ACCGAAGCACTAGTCCGTATGATGGTTTAAGAGCTATGCTGGAAACAGCATAGCAAGTTTAAATAAGGCTAGTCCGTTATCAACTTGAAAAAGTGGCACCGAGTCGGTGCTTTTTT
1|Neg_Control_Human_GA_0287|NegCtrl	AGGCGCCAACATTGACCGTA	0	3304	1203	1519	1	390	1366	823	0	1842	1762	1010	5515	1243	1455	2622	3348	n/a	NegCtrl	NegCtrl|29	1|Neg_Control_Human_GA_0287|NegCtrl	NegCtrl	ACCGAGGCGCCAACATTGACCGTAGTTTAAGAGCTATGCTGGAAACAGCATAGCAAGTTTAAATAAGGCTAGTCCGTTATCAACTTGAAAAAGTGGCACCGAGTCGGTGCTTTTTT
1|Neg_Control_Human_GA_0288|NegCtrl	TAATCATGCACATTCGGGAC	0	1227	718	907	0	0	469	621	0	0	1725	733	1	1715	756	1909	2540	n/a	NegCtrl	NegCtrl|29	1|Neg_Control_Human_GA_0288|NegCtrl	NegCtrl	ACCGTAATCATGCACATTCGGGACGTTTAAGAGCTATGCTGGAAACAGCATAGCAAGTTTAAATAAGGCTAGTCCGTTATCAACTTGAAAAAGTGGCACCGAGTCGGTGCTTTTTT
1|Neg_Control_Human_GA_0289|NegCtrl	CGTCGGGTAGCTATTTCTTT	0	0	1037	955	1	660	764	432	0	0	1765	585	1890	2	1386	2230	2446	n/a	NegCtrl	NegCtrl|29	1|Neg_Control_Human_GA_0289|NegCtrl	NegCtrl	ACCGCGTCGGGTAGCTATTTCTTTGTTTAAGAGCTATGCTGGAAACAGCATAGCAAGTTTAAATAAGGCTAGTCCGTTATCAACTTGAAAAAGTGGCACCGAGTCGGTGCTTTTTT
1|Neg_Control_Human_GA_0290|NegCtrl	GTGCGACGAATTGTCCTGAG	0	1	1154	1167	0	749	851	615	0	1	1527	869	1095	0	1319	1137	2222	n/a	NegCtrl	NegCtrl|29	1|Neg_Control_Human_GA_0290|NegCtrl	NegCtrl	ACCGGTGCGACGAATTGTCCTGAGGTTTAAGAGCTATGCTGGAAACAGCATAGCAAGTTTAAATAAGGCTAGTCCGTTATCAACTTGAAAAAGTGGCACCGAGTCGGTGCTTTTTT
1|Neg_Control_Human_GA_0291|NegCtrl	CTTCCGTTATTCGGAAGTGA	1951	576	928	656	1	546	157	338	0	0	600	486	1	0	294	688	1519	n/a	NegCtrl	NegCtrl|30	1|Neg_Control_Human_GA_0291|NegCtrl	NegCtrl	ACCGCTTCCGTTATTCGGAAGTGAGTTTAAGAGCTATGCTGGAAACAGCATAGCAAGTTTAAATAAGGCTAGTCCGTTATCAACTTGAAAAAGTGGCACCGAGTCGGTGCTTTTTT
1|Neg_Control_Human_GA_0292|NegCtrl	TACTGGAGTTTGCGACTCGG	6774	482	1376	1289	0	1070	755	1074	0	0	1109	794	0	1738	802	1235	2599	n/a	NegCtrl	NegCtrl|30	1|Neg_Control_Human_GA_0292|NegCtrl	NegCtrl	ACCGTACTGGAGTTTGCGACTCGGGTTTAAGAGCTATGCTGGAAACAGCATAGCAAGTTTAAATAAGGCTAGTCCGTTATCAACTTGAAAAAGTGGCACCGAGTCGGTGCTTTTTT
1|Neg_Control_Human_GA_0293|NegCtrl	ATCCAGATCACCACGCGTCA	0	1729	1695	1569	2	512	1446	1438	0	1770	2114	1560	3044	3040	1505	1416	4422	n/a	NegCtrl	NegCtrl|30	1|Neg_Control_Human_GA_0293|NegCtrl	NegCtrl	ACCGATCCAGATCACCACGCGTCAGTTTAAGAGCTATGCTGGAAACAGCATAGCAAGTTTAAATAAGGCTAGTCCGTTATCAACTTGAAAAAGTGGCACCGAGTCGGTGCTTTTTT
1|Neg_Control_Human_GA_0294|NegCtrl	CGTTAAGACTAGCTCGGTTT	3276	1626	1139	524	1694	159	12	880	0	1	1263	371	2	0	761	1453	2544	n/a	NegCtrl	NegCtrl|30	1|Neg_Control_Human_GA_0294|NegCtrl	NegCtrl	ACCGCGTTAAGACTAGCTCGGTTTGTTTAAGAGCTATGCTGGAAACAGCATAGCAAGTTTAAATAAGGCTAGTCCGTTATCAACTTGAAAAAGTGGCACCGAGTCGGTGCTTTTTT
1|Neg_Control_Human_GA_0295|NegCtrl	ATACGGCCGAAGCCCCTTCA	0	0	665	818	2	0	421	980	1	2095	1478	1040	2403	2	1125	2000	2555	n/a	NegCtrl	NegCtrl|30	1|Neg_Control_Human_GA_0295|NegCtrl	NegCtrl	ACCGATACGGCCGAAGCCCCTTCAGTTTAAGAGCTATGCTGGAAACAGCATAGCAAGTTTAAATAAGGCTAGTCCGTTATCAACTTGAAAAAGTGGCACCGAGTCGGTGCTTTTTT
1|Neg_Control_Human_GA_0296|NegCtrl	AACATCTCGTTAGGGGTATC	4766	5	1212	980	0	840	563	909	0	0	2001	749	1907	2	778	694	2531	n/a	NegCtrl	NegCtrl|30	1|Neg_Control_Human_GA_0296|NegCtrl	NegCtrl	ACCGAACATCTCGTTAGGGGTATCGTTTAAGAGCTATGCTGGAAACAGCATAGCAAGTTTAAATAAGGCTAGTCCGTTATCAACTTGAAAAAGTGGCACCGAGTCGGTGCTTTTTT
1|Neg_Control_Human_GA_0297|NegCtrl	GTCAGGTAATAGTCGGACTC	0	1	708	600	1967	0	316	368	0	0	778	453	0	2534	419	1333	2222	n/a	NegCtrl	NegCtrl|30	1|Neg_Control_Human_GA_0297|NegCtrl	NegCtrl	ACCGGTCAGGTAATAGTCGGACTCGTTTAAGAGCTATGCTGGAAACAGCATAGCAAGTTTAAATAAGGCTAGTCCGTTATCAACTTGAAAAAGTGGCACCGAGTCGGTGCTTTTTT
1|Neg_Control_Human_GA_0298|NegCtrl	TTCGAGGTCCGGACAGGTCG	1963	529	1241	1259	1	570	342	1130	18911	2034	723	416	3433	1152	1233	1518	2155	n/a	NegCtrl	NegCtrl|30	1|Neg_Control_Human_GA_0298|NegCtrl	NegCtrl	ACCGTTCGAGGTCCGGACAGGTCGGTTTAAGAGCTATGCTGGAAACAGCATAGCAAGTTTAAATAAGGCTAGTCCGTTATCAACTTGAAAAAGTGGCACCGAGTCGGTGCTTTTTT
1|Neg_Control_Human_GA_0299|NegCtrl	TGAGCATTCGTAGCCCAGCA	684	0	1359	1016	1	830	484	575	0	0	1353	683	0	0	1089	1225	2848	n/a	NegCtrl	NegCtrl|30	1|Neg_Control_Human_GA_0299|NegCtrl	NegCtrl	ACCGTGAGCATTCGTAGCCCAGCAGTTTAAGAGCTATGCTGGAAACAGCATAGCAAGTTTAAATAAGGCTAGTCCGTTATCAACTTGAAAAAGTGGCACCGAGTCGGTGCTTTTTT
1|Neg_Control_Human_GA_0300|NegCtrl	TAAGGCGACCTGCGCTTGTG	1	1122	2924	2664	205	765	1674	1509	8310	3130	3441	1756	8468	851	2483	3747	6209	n/a	NegCtrl	NegCtrl|30	1|Neg_Control_Human_GA_0300|NegCtrl	NegCtrl	ACCGTAAGGCGACCTGCGCTTGTGGTTTAAGAGCTATGCTGGAAACAGCATAGCAAGTTTAAATAAGGCTAGTCCGTTATCAACTTGAAAAAGTGGCACCGAGTCGGTGCTTTTTT
1|Neg_Control_Human_GA_0301|NegCtrl	AGCTGCGCGCTACTGGATCA	1	0	882	995	0	982	338	394	0	0	1372	588	4975	4151	725	390	2510	n/a	NegCtrl	NegCtrl|31	1|Neg_Control_Human_GA_0301|NegCtrl	NegCtrl	ACCGAGCTGCGCGCTACTGGATCAGTTTAAGAGCTATGCTGGAAACAGCATAGCAAGTTTAAATAAGGCTAGTCCGTTATCAACTTGAAAAAGTGGCACCGAGTCGGTGCTTTTTT
1|Neg_Control_Human_GA_0302|NegCtrl	GCAAAAACCCAACGCTATTC	0	1654	1285	992	1	0	734	673	1	2336	1633	1268	0	0	1183	991	2618	n/a	NegCtrl	NegCtrl|31	1|Neg_Control_Human_GA_0302|NegCtrl	NegCtrl	ACCGGCAAAAACCCAACGCTATTCGTTTAAGAGCTATGCTGGAAACAGCATAGCAAGTTTAAATAAGGCTAGTCCGTTATCAACTTGAAAAAGTGGCACCGAGTCGGTGCTTTTTT
1|Neg_Control_Human_GA_0303|NegCtrl	GCCGCCGATTTCATAAGTAA	0	631	1037	637	0	170	566	684	0	1404	1408	397	0	3139	924	506	1761	n/a	NegCtrl	NegCtrl|31	1|Neg_Control_Human_GA_0303|NegCtrl	NegCtrl	ACCGGCCGCCGATTTCATAAGTAAGTTTAAGAGCTATGCTGGAAACAGCATAGCAAGTTTAAATAAGGCTAGTCCGTTATCAACTTGAAAAAGTGGCACCGAGTCGGTGCTTTTTT
1|Neg_Control_Human_GA_0304|NegCtrl	GTTCCGTGAGGGTTACTTCA	1	677	977	627	3185	309	316	679	0	0	808	289	0	1005	1200	1101	1718	n/a	NegCtrl	NegCtrl|31	1|Neg_Control_Human_GA_0304|NegCtrl	NegCtrl	ACCGGTTCCGTGAGGGTTACTTCAGTTTAAGAGCTATGCTGGAAACAGCATAGCAAGTTTAAATAAGGCTAGTCCGTTATCAACTTGAAAAAGTGGCACCGAGTCGGTGCTTTTTT
1|Neg_Control_Human_GA_0305|NegCtrl	CGGGGAATTGCACGGCGGAA	0	0	1134	831	1622	382	1140	903	0	0	1119	472	1	920	959	1878	1898	n/a	NegCtrl	NegCtrl|31	1|Neg_Control_Human_GA_0305|NegCtrl	NegCtrl	ACCGCGGGGAATTGCACGGCGGAAGTTTAAGAGCTATGCTGGAAACAGCATAGCAAGTTTAAATAAGGCTAGTCCGTTATCAACTTGAAAAAGTGGCACCGAGTCGGTGCTTTTTT
1|Neg_Control_Human_GA_0306|NegCtrl	TGTCTTTAAACACGCCATCG	2950	1670	1467	839	1895	0	278	774	1	1907	1283	594	1693	1	1684	1207	2911	n/a	NegCtrl	NegCtrl|31	1|Neg_Control_Human_GA_0306|NegCtrl	NegCtrl	ACCGTGTCTTTAAACACGCCATCGGTTTAAGAGCTATGCTGGAAACAGCATAGCAAGTTTAAATAAGGCTAGTCCGTTATCAACTTGAAAAAGTGGCACCGAGTCGGTGCTTTTTT
1|Neg_Control_Human_GA_0307|NegCtrl	ACAAAATGCCGTGCGTCAAT	0	4953	1826	1239	4196	0	1023	776	1	2928	1727	1138	0	1043	1155	1420	3150	n/a	NegCtrl	NegCtrl|31	1|Neg_Control_Human_GA_0307|NegCtrl	NegCtrl	ACCGACAAAATGCCGTGCGTCAATGTTTAAGAGCTATGCTGGAAACAGCATAGCAAGTTTAAATAAGGCTAGTCCGTTATCAACTTGAAAAAGTGGCACCGAGTCGGTGCTTTTTT
1|Neg_Control_Human_GA_0308|NegCtrl	ACGCTCAGCACCCGCTATGC	1556	0	591	506	1207	485	362	644	28123	3	1094	478	0	1578	1116	882	2269	n/a	NegCtrl	NegCtrl|31	1|Neg_Control_Human_GA_0308|NegCtrl	NegCtrl	ACCGACGCTCAGCACCCGCTATGCGTTTAAGAGCTATGCTGGAAACAGCATAGCAAGTTTAAATAAGGCTAGTCCGTTATCAACTTGAAAAAGTGGCACCGAGTCGGTGCTTTTTT
1|Neg_Control_Human_GA_0309|NegCtrl	CGAAACCCTCTTAAGTTAAC	4605	2197	770	850	0	503	682	435	1	3578	741	764	3353	2247	1111	810	3455	n/a	NegCtrl	NegCtrl|31	1|Neg_Control_Human_GA_0309|NegCtrl	NegCtrl	ACCGCGAAACCCTCTTAAGTTAACGTTTAAGAGCTATGCTGGAAACAGCATAGCAAGTTTAAATAAGGCTAGTCCGTTATCAACTTGAAAAAGTGGCACCGAGTCGGTGCTTTTTT
1|Neg_Control_Human_GA_0310|NegCtrl	TAAACCCTTGGCGCCCTCAC	0	6007	3647	2730	5	713	1949	1575	9348	1622	2857	1445	2544	1019	2696	3462	7282	n/a	NegCtrl	NegCtrl|31	1|Neg_Control_Human_GA_0310|NegCtrl	NegCtrl	ACCGTAAACCCTTGGCGCCCTCACGTTTAAGAGCTATGCTGGAAACAGCATAGCAAGTTTAAATAAGGCTAGTCCGTTATCAACTTGAAAAAGTGGCACCGAGTCGGTGCTTTTTT
1|Neg_Control_Human_GA_0311|NegCtrl	CCATTCTCAACCGGTCCAAT	6214	1581	1721	1158	3	720	1482	1304	0	0	1262	591	0	1	1191	1390	3624	n/a	NegCtrl	NegCtrl|32	1|Neg_Control_Human_GA_0311|NegCtrl	NegCtrl	ACCGCCATTCTCAACCGGTCCAATGTTTAAGAGCTATGCTGGAAACAGCATAGCAAGTTTAAATAAGGCTAGTCCGTTATCAACTTGAAAAAGTGGCACCGAGTCGGTGCTTTTTT
1|Neg_Control_Human_GA_0312|NegCtrl	GTTATTGACCCGTCGGGAGT	0	2441	1905	1615	1	1951	1385	1396	14216	0	2916	1231	157	0	2247	2092	5339	n/a	NegCtrl	NegCtrl|32	1|Neg_Control_Human_GA_0312|NegCtrl	NegCtrl	ACCGGTTATTGACCCGTCGGGAGTGTTTAAGAGCTATGCTGGAAACAGCATAGCAAGTTTAAATAAGGCTAGTCCGTTATCAACTTGAAAAAGTGGCACCGAGTCGGTGCTTTTTT
1|Neg_Control_Human_GA_0313|NegCtrl	CTTTGATAACGTGGGCGGTA	0	0	1240	1179	0	701	797	928	8961	1	1093	516	0	0	620	612	2340	n/a	NegCtrl	NegCtrl|32	1|Neg_Control_Human_GA_0313|NegCtrl	NegCtrl	ACCGCTTTGATAACGTGGGCGGTAGTTTAAGAGCTATGCTGGAAACAGCATAGCAAGTTTAAATAAGGCTAGTCCGTTATCAACTTGAAAAAGTGGCACCGAGTCGGTGCTTTTTT
1|Neg_Control_Human_GA_0314|NegCtrl	CCCCAACTTTCGCGACTCCG	0	0	966	1166	1	1410	637	970	0	7493	1721	604	0	1264	1062	893	2874	n/a	NegCtrl	NegCtrl|32	1|Neg_Control_Human_GA_0314|NegCtrl	NegCtrl	ACCGCCCCAACTTTCGCGACTCCGGTTTAAGAGCTATGCTGGAAACAGCATAGCAAGTTTAAATAAGGCTAGTCCGTTATCAACTTGAAAAAGTGGCACCGAGTCGGTGCTTTTTT
1|Neg_Control_Human_GA_0315|NegCtrl	CAAACAGTCTAAGGCGACGA	3342	3250	1945	1204	5704	598	879	1415	0	0	1844	1574	2528	3859	2325	2549	3932	n/a	NegCtrl	NegCtrl|32	1|Neg_Control_Human_GA_0315|NegCtrl	NegCtrl	ACCGCAAACAGTCTAAGGCGACGAGTTTAAGAGCTATGCTGGAAACAGCATAGCAAGTTTAAATAAGGCTAGTCCGTTATCAACTTGAAAAAGTGGCACCGAGTCGGTGCTTTTTT
1|Neg_Control_Human_GA_0316|NegCtrl	CGGCACACCAATGCGTTCGT	680	2988	1263	892	2783	256	250	999	0	0	1040	1082	0	1419	934	1756	3051	n/a	NegCtrl	NegCtrl|32	1|Neg_Control_Human_GA_0316|NegCtrl	NegCtrl	ACCGCGGCACACCAATGCGTTCGTGTTTAAGAGCTATGCTGGAAACAGCATAGCAAGTTTAAATAAGGCTAGTCCGTTATCAACTTGAAAAAGTGGCACCGAGTCGGTGCTTTTTT
1|Neg_Control_Human_GA_0317|NegCtrl	ATCGATATACCGCCATAAAA	4127	309	852	567	1156	430	644	891	0	0	1034	429	4715	1136	1232	929	1807	n/a	NegCtrl	NegCtrl|32	1|Neg_Control_Human_GA_0317|NegCtrl	NegCtrl	ACCGATCGATATACCGCCATAAAAGTTTAAGAGCTATGCTGGAAACAGCATAGCAAGTTTAAATAAGGCTAGTCCGTTATCAACTTGAAAAAGTGGCACCGAGTCGGTGCTTTTTT
1|Neg_Control_Human_GA_0318|NegCtrl	GGGACGCGAAAGAAACCAGT	0	1424	1217	1300	1724	0	911	908	0	63	2071	1181	6888	2922	1647	2708	2531	n/a	NegCtrl	NegCtrl|32	1|Neg_Control_Human_GA_0318|NegCtrl	NegCtrl	ACCGGGGACGCGAAAGAAACCAGTGTTTAAGAGCTATGCTGGAAACAGCATAGCAAGTTTAAATAAGGCTAGTCCGTTATCAACTTGAAAAAGTGGCACCGAGTCGGTGCTTTTTT
1|Neg_Control_Human_GA_0319|NegCtrl	AACGCGAGTCCGGTGGCTAG	2256	420	517	354	1	0	191	632	0	0	600	323	1	1739	528	829	1517	n/a	NegCtrl	NegCtrl|32	1|Neg_Control_Human_GA_0319|NegCtrl	NegCtrl	ACCGAACGCGAGTCCGGTGGCTAGGTTTAAGAGCTATGCTGGAAACAGCATAGCAAGTTTAAATAAGGCTAGTCCGTTATCAACTTGAAAAAGTGGCACCGAGTCGGTGCTTTTTT
1|Neg_Control_Human_GA_0320|NegCtrl	TGTCATTAGCGTAACGATAT	0	0	583	341	0	198	0	259	0	0	807	208	0	1607	642	1025	1706	n/a	NegCtrl	NegCtrl|32	1|Neg_Control_Human_GA_0320|NegCtrl	NegCtrl	ACCGTGTCATTAGCGTAACGATATGTTTAAGAGCTATGCTGGAAACAGCATAGCAAGTTTAAATAAGGCTAGTCCGTTATCAACTTGAAAAAGTGGCACCGAGTCGGTGCTTTTTT
1|Neg_Control_Human_GA_0321|NegCtrl	AGGGCGAGCAGCAGAGTACG	2701	52	1741	1366	150	583	1909	873	0	1717	2654	1109	3645	2	2281	2640	3355	n/a	NegCtrl	NegCtrl|33	1|Neg_Control_Human_GA_0321|NegCtrl	NegCtrl	ACCGAGGGCGAGCAGCAGAGTACGGTTTAAGAGCTATGCTGGAAACAGCATAGCAAGTTTAAATAAGGCTAGTCCGTTATCAACTTGAAAAAGTGGCACCGAGTCGGTGCTTTTTT
1|Neg_Control_Human_GA_0322|NegCtrl	CCGTCTCCGCATCGTCTTTT	5646	1603	2748	2264	2	1958	2357	1787	0	0	4705	1453	7053	3701	2607	2877	8392	n/a	NegCtrl	NegCtrl|33	1|Neg_Control_Human_GA_0322|NegCtrl	NegCtrl	ACCGCCGTCTCCGCATCGTCTTTTGTTTAAGAGCTATGCTGGAAACAGCATAGCAAGTTTAAATAAGGCTAGTCCGTTATCAACTTGAAAAAGTGGCACCGAGTCGGTGCTTTTTT
1|Neg_Control_Human_GA_0323|NegCtrl	CGTGCGTGAAATCGCTAGCT	0	585	674	555	1	266	353	572	0	1884	774	519	4390	3	951	1404	2228	n/a	NegCtrl	NegCtrl|33	1|Neg_Control_Human_GA_0323|NegCtrl	NegCtrl	ACCGCGTGCGTGAAATCGCTAGCTGTTTAAGAGCTATGCTGGAAACAGCATAGCAAGTTTAAATAAGGCTAGTCCGTTATCAACTTGAAAAAGTGGCACCGAGTCGGTGCTTTTTT
1|Neg_Control_Human_GA_0324|NegCtrl	ATCAGGCCTTGTCCGTGATT	2184	1585	3487	2922	2629	1155	2824	2106	0	1666	4489	2148	6136	7207	3993	3710	8222	n/a	NegCtrl	NegCtrl|33	1|Neg_Control_Human_GA_0324|NegCtrl	NegCtrl	ACCGATCAGGCCTTGTCCGTGATTGTTTAAGAGCTATGCTGGAAACAGCATAGCAAGTTTAAATAAGGCTAGTCCGTTATCAACTTGAAAAAGTGGCACCGAGTCGGTGCTTTTTT
1|Neg_Control_Human_GA_0325|NegCtrl	CGTCCAGAAGAACGGCCCCT	0	652	1402	1238	0	1111	892	970	0	2177	1518	1222	6208	3174	928	2005	2729	n/a	NegCtrl	NegCtrl|33	1|Neg_Control_Human_GA_0325|NegCtrl	NegCtrl	ACCGCGTCCAGAAGAACGGCCCCTGTTTAAGAGCTATGCTGGAAACAGCATAGCAAGTTTAAATAAGGCTAGTCCGTTATCAACTTGAAAAAGTGGCACCGAGTCGGTGCTTTTTT
1|Neg_Control_Human_GA_0326|NegCtrl	GATGGCGCGCAGTTGAGTCA	0	1523	1857	1902	6	792	1686	1597	7458	0	1254	1209	5433	4105	1955	1855	4348	n/a	NegCtrl	NegCtrl|33	1|Neg_Control_Human_GA_0326|NegCtrl	NegCtrl	ACCGGATGGCGCGCAGTTGAGTCAGTTTAAGAGCTATGCTGGAAACAGCATAGCAAGTTTAAATAAGGCTAGTCCGTTATCAACTTGAAAAAGTGGCACCGAGTCGGTGCTTTTTT
1|Neg_Control_Human_GA_0327|NegCtrl	ACGCTGACGAGTAAAAGCGG	1	2564	1131	1238	2	1026	658	410	0	4869	2750	826	2628	2077	2154	1367	3479	n/a	NegCtrl	NegCtrl|33	1|Neg_Control_Human_GA_0327|NegCtrl	NegCtrl	ACCGACGCTGACGAGTAAAAGCGGGTTTAAGAGCTATGCTGGAAACAGCATAGCAAGTTTAAATAAGGCTAGTCCGTTATCAACTTGAAAAAGTGGCACCGAGTCGGTGCTTTTTT
1|Neg_Control_Human_GA_0328|NegCtrl	TATCAATCGTCCGGGTCACT	0	4735	1125	1179	0	593	667	719	0	4768	1469	735	1938	1850	951	2289	2549	n/a	NegCtrl	NegCtrl|33	1|Neg_Control_Human_GA_0328|NegCtrl	NegCtrl	ACCGTATCAATCGTCCGGGTCACTGTTTAAGAGCTATGCTGGAAACAGCATAGCAAGTTTAAATAAGGCTAGTCCGTTATCAACTTGAAAAAGTGGCACCGAGTCGGTGCTTTTTT
1|Neg_Control_Human_GA_0329|NegCtrl	TCAGATTCCGCAAGGGTCCA	0	1646	1833	1707	2	1828	801	1319	0	0	1963	1387	1	4184	1315	1613	4453	n/a	NegCtrl	NegCtrl|33	1|Neg_Control_Human_GA_0329|NegCtrl	NegCtrl	ACCGTCAGATTCCGCAAGGGTCCAGTTTAAGAGCTATGCTGGAAACAGCATAGCAAGTTTAAATAAGGCTAGTCCGTTATCAACTTGAAAAAGTGGCACCGAGTCGGTGCTTTTTT
1|Neg_Control_Human_GA_0330|NegCtrl	GCGATCGGAGTGCCACGATA	533	2325	661	695	0	345	272	562	0	0	916	911	1	794	926	2043	2475	n/a	NegCtrl	NegCtrl|33	1|Neg_Control_Human_GA_0330|NegCtrl	NegCtrl	ACCGGCGATCGGAGTGCCACGATAGTTTAAGAGCTATGCTGGAAACAGCATAGCAAGTTTAAATAAGGCTAGTCCGTTATCAACTTGAAAAAGTGGCACCGAGTCGGTGCTTTTTT
1|Neg_Control_Human_GA_0331|NegCtrl	ATATAAACTGTCGCGGTAAA	0	0	1044	1141	0	552	648	447	0	9	1426	608	46	1344	1057	1236	3637	n/a	NegCtrl	NegCtrl|34	1|Neg_Control_Human_GA_0331|NegCtrl	NegCtrl	ACCGATATAAACTGTCGCGGTAAAGTTTAAGAGCTATGCTGGAAACAGCATAGCAAGTTTAAATAAGGCTAGTCCGTTATCAACTTGAAAAAGTGGCACCGAGTCGGTGCTTTTTT
1|Neg_Control_Human_GA_0332|NegCtrl	GTTACCTGCTACGAAAACGA	0	2518	1068	715	0	684	93	340	0	2007	1225	518	1	1426	948	864	2846	n/a	NegCtrl	NegCtrl|34	1|Neg_Control_Human_GA_0332|NegCtrl	NegCtrl	ACCGGTTACCTGCTACGAAAACGAGTTTAAGAGCTATGCTGGAAACAGCATAGCAAGTTTAAATAAGGCTAGTCCGTTATCAACTTGAAAAAGTGGCACCGAGTCGGTGCTTTTTT
1|Neg_Control_Human_GA_0333|NegCtrl	GAAGCGATCCGAGAGTGTAT	0	124	1026	1306	1	306	494	969	0	0	1092	831	1	1944	979	1442	2641	n/a	NegCtrl	NegCtrl|34	1|Neg_Control_Human_GA_0333|NegCtrl	NegCtrl	ACCGGAAGCGATCCGAGAGTGTATGTTTAAGAGCTATGCTGGAAACAGCATAGCAAGTTTAAATAAGGCTAGTCCGTTATCAACTTGAAAAAGTGGCACCGAGTCGGTGCTTTTTT
1|Neg_Control_Human_GA_0334|NegCtrl	ATGACATTGCGCGTCTACGG	0	0	1044	681	0	531	746	397	13208	1	1331	1043	0	1664	719	806	2458	n/a	NegCtrl	NegCtrl|34	1|Neg_Control_Human_GA_0334|NegCtrl	NegCtrl	ACCGATGACATTGCGCGTCTACGGGTTTAAGAGCTATGCTGGAAACAGCATAGCAAGTTTAAATAAGGCTAGTCCGTTATCAACTTGAAAAAGTGGCACCGAGTCGGTGCTTTTTT
1|Neg_Control_Human_GA_0335|NegCtrl	ATACCAGATGCGTCCGCTTG	0	2625	1393	840	1	331	451	508	0	4631	1369	449	1844	1499	858	1246	2435	n/a	NegCtrl	NegCtrl|34	1|Neg_Control_Human_GA_0335|NegCtrl	NegCtrl	ACCGATACCAGATGCGTCCGCTTGGTTTAAGAGCTATGCTGGAAACAGCATAGCAAGTTTAAATAAGGCTAGTCCGTTATCAACTTGAAAAAGTGGCACCGAGTCGGTGCTTTTTT
1|Neg_Control_Human_GA_0336|NegCtrl	AACGTGCTGACGATGCGGGC	2154	0	713	877	0	0	709	709	0	0	741	343	1630	1	1371	1616	2607	n/a	NegCtrl	NegCtrl|34	1|Neg_Control_Human_GA_0336|NegCtrl	NegCtrl	ACCGAACGTGCTGACGATGCGGGCGTTTAAGAGCTATGCTGGAAACAGCATAGCAAGTTTAAATAAGGCTAGTCCGTTATCAACTTGAAAAAGTGGCACCGAGTCGGTGCTTTTTT
1|Neg_Control_Human_GA_0337|NegCtrl	CGGCACCTGTTAGGCTATTC	0	3140	2273	1942	1	948	2083	1509	0	2041	1906	997	13894	14	1486	2101	5683	n/a	NegCtrl	NegCtrl|34	1|Neg_Control_Human_GA_0337|NegCtrl	NegCtrl	ACCGCGGCACCTGTTAGGCTATTCGTTTAAGAGCTATGCTGGAAACAGCATAGCAAGTTTAAATAAGGCTAGTCCGTTATCAACTTGAAAAAGTGGCACCGAGTCGGTGCTTTTTT
1|Neg_Control_Human_GA_0338|NegCtrl	AGGATCGTGTACCGGGGACG	0	1748	2315	1250	4	654	2099	2390	0	268	1494	1017	2702	2352	2275	2365	5136	n/a	NegCtrl	NegCtrl|34	1|Neg_Control_Human_GA_0338|NegCtrl	NegCtrl	ACCGAGGATCGTGTACCGGGGACGGTTTAAGAGCTATGCTGGAAACAGCATAGCAAGTTTAAATAAGGCTAGTCCGTTATCAACTTGAAAAAGTGGCACCGAGTCGGTGCTTTTTT
1|Neg_Control_Human_GA_0339|NegCtrl	CGACAACGTGCAGGTGTATC	0	983	1193	992	1	0	950	722	0	0	1063	291	1590	2503	666	1052	2488	n/a	NegCtrl	NegCtrl|34	1|Neg_Control_Human_GA_0339|NegCtrl	NegCtrl	ACCGCGACAACGTGCAGGTGTATCGTTTAAGAGCTATGCTGGAAACAGCATAGCAAGTTTAAATAAGGCTAGTCCGTTATCAACTTGAAAAAGTGGCACCGAGTCGGTGCTTTTTT
1|Neg_Control_Human_GA_0340|NegCtrl	ACTCGAAATCACCTATGGTA	2118	649	1103	632	1	266	708	408	0	0	1447	571	3246	5	834	911	1895	n/a	NegCtrl	NegCtrl|34	1|Neg_Control_Human_GA_0340|NegCtrl	NegCtrl	ACCGACTCGAAATCACCTATGGTAGTTTAAGAGCTATGCTGGAAACAGCATAGCAAGTTTAAATAAGGCTAGTCCGTTATCAACTTGAAAAAGTGGCACCGAGTCGGTGCTTTTTT
1|Neg_Control_Human_GA_0341|NegCtrl	TCTCGTAGCCTAATGCGCCA	1962	2719	1085	844	1	771	719	868	0	1	1115	793	0	0	919	1258	2834	n/a	NegCtrl	NegCtrl|35	1|Neg_Control_Human_GA_0341|NegCtrl	NegCtrl	ACCGTCTCGTAGCCTAATGCGCCAGTTTAAGAGCTATGCTGGAAACAGCATAGCAAGTTTAAATAAGGCTAGTCCGTTATCAACTTGAAAAAGTGGCACCGAGTCGGTGCTTTTTT
1|Neg_Control_Human_GA_0342|NegCtrl	TTATGTGAGCACGCCATTAC	0	1	911	581	1	0	615	538	7890	0	1175	547	2228	0	784	1001	2700	n/a	NegCtrl	NegCtrl|35	1|Neg_Control_Human_GA_0342|NegCtrl	NegCtrl	ACCGTTATGTGAGCACGCCATTACGTTTAAGAGCTATGCTGGAAACAGCATAGCAAGTTTAAATAAGGCTAGTCCGTTATCAACTTGAAAAAGTGGCACCGAGTCGGTGCTTTTTT
1|Neg_Control_Human_GA_0343|NegCtrl	CGACGGTAATGCACCTACTA	0	959	1469	1141	2	441	784	1037	0	0	2388	566	4572	5	1114	1221	2936	n/a	NegCtrl	NegCtrl|35	1|Neg_Control_Human_GA_0343|NegCtrl	NegCtrl	ACCGCGACGGTAATGCACCTACTAGTTTAAGAGCTATGCTGGAAACAGCATAGCAAGTTTAAATAAGGCTAGTCCGTTATCAACTTGAAAAAGTGGCACCGAGTCGGTGCTTTTTT
1|Neg_Control_Human_GA_0344|NegCtrl	ATCTGTGTGACTGCGGTCGG	0	1784	1562	1405	2	543	448	833	0	2247	1332	665	6922	7	1574	3357	3820	n/a	NegCtrl	NegCtrl|35	1|Neg_Control_Human_GA_0344|NegCtrl	NegCtrl	ACCGATCTGTGTGACTGCGGTCGGGTTTAAGAGCTATGCTGGAAACAGCATAGCAAGTTTAAATAAGGCTAGTCCGTTATCAACTTGAAAAAGTGGCACCGAGTCGGTGCTTTTTT
1|Neg_Control_Human_GA_0345|NegCtrl	TGGAAAGCGAGCACACCGTC	5059	5	1697	1212	2	0	1171	879	0	1	1116	606	1	0	1159	1098	3088	n/a	NegCtrl	NegCtrl|35	1|Neg_Control_Human_GA_0345|NegCtrl	NegCtrl	ACCGTGGAAAGCGAGCACACCGTCGTTTAAGAGCTATGCTGGAAACAGCATAGCAAGTTTAAATAAGGCTAGTCCGTTATCAACTTGAAAAAGTGGCACCGAGTCGGTGCTTTTTT
1|Neg_Control_Human_GA_0346|NegCtrl	CAGCGCCGAAACTCTTTCCG	0	1171	1385	1402	2	653	1062	1017	1	0	1551	655	5593	1533	1865	1366	3279	n/a	NegCtrl	NegCtrl|35	1|Neg_Control_Human_GA_0346|NegCtrl	NegCtrl	ACCGCAGCGCCGAAACTCTTTCCGGTTTAAGAGCTATGCTGGAAACAGCATAGCAAGTTTAAATAAGGCTAGTCCGTTATCAACTTGAAAAAGTGGCACCGAGTCGGTGCTTTTTT
1|Neg_Control_Human_GA_0347|NegCtrl	TGCCGTTAGCATGCGATCCC	0	2215	753	721	0	0	836	692	0	1216	1643	653	2453	2	1675	1852	3939	n/a	NegCtrl	NegCtrl|35	1|Neg_Control_Human_GA_0347|NegCtrl	NegCtrl	ACCGTGCCGTTAGCATGCGATCCCGTTTAAGAGCTATGCTGGAAACAGCATAGCAAGTTTAAATAAGGCTAGTCCGTTATCAACTTGAAAAAGTGGCACCGAGTCGGTGCTTTTTT
1|Neg_Control_Human_GA_0348|NegCtrl	TCGTAAACACACGACCAAGT	7184	0	1099	817	2	382	1192	1026	0	0	729	590	1	1	1632	1903	2719	n/a	NegCtrl	NegCtrl|35	1|Neg_Control_Human_GA_0348|NegCtrl	NegCtrl	ACCGTCGTAAACACACGACCAAGTGTTTAAGAGCTATGCTGGAAACAGCATAGCAAGTTTAAATAAGGCTAGTCCGTTATCAACTTGAAAAAGTGGCACCGAGTCGGTGCTTTTTT
1|Neg_Control_Human_GA_0349|NegCtrl	ACTACTCCGGCAAATACTCG	2794	0	1198	1473	1465	1226	124	366	37	1364	808	346	0	0	1448	491	2411	n/a	NegCtrl	NegCtrl|35	1|Neg_Control_Human_GA_0349|NegCtrl	NegCtrl	ACCGACTACTCCGGCAAATACTCGGTTTAAGAGCTATGCTGGAAACAGCATAGCAAGTTTAAATAAGGCTAGTCCGTTATCAACTTGAAAAAGTGGCACCGAGTCGGTGCTTTTTT
1|Neg_Control_Human_GA_0350|NegCtrl	GCCCTTCAATGCGTTCCGTA	2512	1373	2007	2123	1488	1104	1905	1793	0	1	2283	1138	0	2775	2661	1614	6315	n/a	NegCtrl	NegCtrl|35	1|Neg_Control_Human_GA_0350|NegCtrl	NegCtrl	ACCGGCCCTTCAATGCGTTCCGTAGTTTAAGAGCTATGCTGGAAACAGCATAGCAAGTTTAAATAAGGCTAGTCCGTTATCAACTTGAAAAAGTGGCACCGAGTCGGTGCTTTTTT
1|Neg_Control_Human_GA_0351|NegCtrl	CAACACCCCGCGTTATGCTA	7045	2106	1373	814	0	885	678	568	0	1721	1244	893	0	0	1181	1110	2626	n/a	NegCtrl	NegCtrl|36	1|Neg_Control_Human_GA_0351|NegCtrl	NegCtrl	ACCGCAACACCCCGCGTTATGCTAGTTTAAGAGCTATGCTGGAAACAGCATAGCAAGTTTAAATAAGGCTAGTCCGTTATCAACTTGAAAAAGTGGCACCGAGTCGGTGCTTTTTT
1|Neg_Control_Human_GA_0352|NegCtrl	GCTGATATATACGACAAGCC	0	1088	1591	1040	4	2494	1492	1199	0	4419	1883	1380	2675	2	2247	2869	4353	n/a	NegCtrl	NegCtrl|36	1|Neg_Control_Human_GA_0352|NegCtrl	NegCtrl	ACCGGCTGATATATACGACAAGCCGTTTAAGAGCTATGCTGGAAACAGCATAGCAAGTTTAAATAAGGCTAGTCCGTTATCAACTTGAAAAAGTGGCACCGAGTCGGTGCTTTTTT
1|Neg_Control_Human_GA_0353|NegCtrl	GGTATTCCGAAGTCCTCCGC	1	0	961	693	0	237	642	356	0	3402	1048	541	0	1394	1179	1537	2671	n/a	NegCtrl	NegCtrl|36	1|Neg_Control_Human_GA_0353|NegCtrl	NegCtrl	ACCGGGTATTCCGAAGTCCTCCGCGTTTAAGAGCTATGCTGGAAACAGCATAGCAAGTTTAAATAAGGCTAGTCCGTTATCAACTTGAAAAAGTGGCACCGAGTCGGTGCTTTTTT
1|Neg_Control_Human_GA_0354|NegCtrl	GGTCGCCTGTGCGACATGCT	3438	2030	979	724	5	221	929	1092	0	0	1411	572	1	0	615	884	2701	n/a	NegCtrl	NegCtrl|36	1|Neg_Control_Human_GA_0354|NegCtrl	NegCtrl	ACCGGGTCGCCTGTGCGACATGCTGTTTAAGAGCTATGCTGGAAACAGCATAGCAAGTTTAAATAAGGCTAGTCCGTTATCAACTTGAAAAAGTGGCACCGAGTCGGTGCTTTTTT
1|Neg_Control_Human_GA_0355|NegCtrl	CTAATCACGACCTCACCCTA	2	515	1724	1166	3135	631	1068	818	1	1627	1825	669	2553	3	1403	1570	3312	n/a	NegCtrl	NegCtrl|36	1|Neg_Control_Human_GA_0355|NegCtrl	NegCtrl	ACCGCTAATCACGACCTCACCCTAGTTTAAGAGCTATGCTGGAAACAGCATAGCAAGTTTAAATAAGGCTAGTCCGTTATCAACTTGAAAAAGTGGCACCGAGTCGGTGCTTTTTT
1|Neg_Control_Human_GA_0356|NegCtrl	ATCGGTACCTCTTCACATAT	0	2073	887	714	0	625	513	405	0	0	601	344	2774	1001	1179	677	2122	n/a	NegCtrl	NegCtrl|36	1|Neg_Control_Human_GA_0356|NegCtrl	NegCtrl	ACCGATCGGTACCTCTTCACATATGTTTAAGAGCTATGCTGGAAACAGCATAGCAAGTTTAAATAAGGCTAGTCCGTTATCAACTTGAAAAAGTGGCACCGAGTCGGTGCTTTTTT
1|Neg_Control_Human_GA_0357|NegCtrl	TTGCGTCAGCGCTGCACATC	0	1074	1465	1134	4	520	1008	978	0	5134	1925	1001	0	6843	1184	1929	4229	n/a	NegCtrl	NegCtrl|36	1|Neg_Control_Human_GA_0357|NegCtrl	NegCtrl	ACCGTTGCGTCAGCGCTGCACATCGTTTAAGAGCTATGCTGGAAACAGCATAGCAAGTTTAAATAAGGCTAGTCCGTTATCAACTTGAAAAAGTGGCACCGAGTCGGTGCTTTTTT
1|Neg_Control_Human_GA_0358|NegCtrl	CGGTGTGCCCCCAAATATTG	0	1062	1849	1604	4307	1888	1469	1003	41514	1839	2045	635	2450	1074	1115	1608	3056	n/a	NegCtrl	NegCtrl|36	1|Neg_Control_Human_GA_0358|NegCtrl	NegCtrl	ACCGCGGTGTGCCCCCAAATATTGGTTTAAGAGCTATGCTGGAAACAGCATAGCAAGTTTAAATAAGGCTAGTCCGTTATCAACTTGAAAAAGTGGCACCGAGTCGGTGCTTTTTT
1|Neg_Control_Human_GA_0359|NegCtrl	CGTGCGGTAAATACGAAATA	0	1	1285	1018	1	0	961	668	18048	1986	1830	567	1	1605	659	1240	3666	n/a	NegCtrl	NegCtrl|36	1|Neg_Control_Human_GA_0359|NegCtrl	NegCtrl	ACCGCGTGCGGTAAATACGAAATAGTTTAAGAGCTATGCTGGAAACAGCATAGCAAGTTTAAATAAGGCTAGTCCGTTATCAACTTGAAAAAGTGGCACCGAGTCGGTGCTTTTTT
1|Neg_Control_Human_GA_0360|NegCtrl	ATACGAGGCGCTTTTCTTTG	0	321	719	644	0	240	81	747	0	0	526	327	0	542	326	226	2535	n/a	NegCtrl	NegCtrl|36	1|Neg_Control_Human_GA_0360|NegCtrl	NegCtrl	ACCGATACGAGGCGCTTTTCTTTGGTTTAAGAGCTATGCTGGAAACAGCATAGCAAGTTTAAATAAGGCTAGTCCGTTATCAACTTGAAAAAGTGGCACCGAGTCGGTGCTTTTTT
1|Neg_Control_Human_GA_0361|NegCtrl	TGTGCACAAGTCGCAACGAA	0	1338	923	976	1021	250	476	527	0	1804	732	750	1	1312	813	1323	2412	n/a	NegCtrl	NegCtrl|37	1|Neg_Control_Human_GA_0361|NegCtrl	NegCtrl	ACCGTGTGCACAAGTCGCAACGAAGTTTAAGAGCTATGCTGGAAACAGCATAGCAAGTTTAAATAAGGCTAGTCCGTTATCAACTTGAAAAAGTGGCACCGAGTCGGTGCTTTTTT
1|Neg_Control_Human_GA_0362|NegCtrl	CTCGGCCCACTTGCGTTATA	0	1659	749	802	0	426	535	336	0	0	547	586	1560	4065	850	1213	2371	n/a	NegCtrl	NegCtrl|37	1|Neg_Control_Human_GA_0362|NegCtrl	NegCtrl	ACCGCTCGGCCCACTTGCGTTATAGTTTAAGAGCTATGCTGGAAACAGCATAGCAAGTTTAAATAAGGCTAGTCCGTTATCAACTTGAAAAAGTGGCACCGAGTCGGTGCTTTTTT
1|Neg_Control_Human_GA_0363|NegCtrl	TATACTGCGGATCAATCTGA	0	587	610	846	0	557	400	168	0	2005	1047	455	0	1417	316	669	2011	n/a	NegCtrl	NegCtrl|37	1|Neg_Control_Human_GA_0363|NegCtrl	NegCtrl	ACCGTATACTGCGGATCAATCTGAGTTTAAGAGCTATGCTGGAAACAGCATAGCAAGTTTAAATAAGGCTAGTCCGTTATCAACTTGAAAAAGTGGCACCGAGTCGGTGCTTTTTT
1|Neg_Control_Human_GA_0364|NegCtrl	AAAGCGACGTAGGCATACTT	1	4435	1414	1269	1807	459	597	1064	0	2	1960	1052	1852	4	1798	1560	3443	n/a	NegCtrl	NegCtrl|37	1|Neg_Control_Human_GA_0364|NegCtrl	NegCtrl	ACCGAAAGCGACGTAGGCATACTTGTTTAAGAGCTATGCTGGAAACAGCATAGCAAGTTTAAATAAGGCTAGTCCGTTATCAACTTGAAAAAGTGGCACCGAGTCGGTGCTTTTTT
1|Neg_Control_Human_GA_0365|NegCtrl	ACGATCGGTAATGGTCTGTT	1997	3565	1563	1711	3511	285	1226	1721	0	0	2043	586	5562	1457	1545	1819	4331	n/a	NegCtrl	NegCtrl|37	1|Neg_Control_Human_GA_0365|NegCtrl	NegCtrl	ACCGACGATCGGTAATGGTCTGTTGTTTAAGAGCTATGCTGGAAACAGCATAGCAAGTTTAAATAAGGCTAGTCCGTTATCAACTTGAAAAAGTGGCACCGAGTCGGTGCTTTTTT
1|Neg_Control_Human_GA_0366|NegCtrl	GGGCCTACGATCAGAGGTGT	1553	1698	1868	1208	2780	780	1671	1294	8957	0	2018	1154	1749	5779	2039	1659	3319	n/a	NegCtrl	NegCtrl|37	1|Neg_Control_Human_GA_0366|NegCtrl	NegCtrl	ACCGGGGCCTACGATCAGAGGTGTGTTTAAGAGCTATGCTGGAAACAGCATAGCAAGTTTAAATAAGGCTAGTCCGTTATCAACTTGAAAAAGTGGCACCGAGTCGGTGCTTTTTT
1|Neg_Control_Human_GA_0367|NegCtrl	CGCAGTCATTCGATAGGAAT	0	1332	1437	960	1	2807	805	1049	8517	0	999	790	2589	1662	2070	1766	2885	n/a	NegCtrl	NegCtrl|37	1|Neg_Control_Human_GA_0367|NegCtrl	NegCtrl	ACCGCGCAGTCATTCGATAGGAATGTTTAAGAGCTATGCTGGAAACAGCATAGCAAGTTTAAATAAGGCTAGTCCGTTATCAACTTGAAAAAGTGGCACCGAGTCGGTGCTTTTTT
1|Neg_Control_Human_GA_0368|NegCtrl	GGCGATTCGGGTGGAGGTCG	0	785	647	843	1	856	1029	440	0	4250	950	692	1	1367	752	1284	2774	n/a	NegCtrl	NegCtrl|37	1|Neg_Control_Human_GA_0368|NegCtrl	NegCtrl	ACCGGGCGATTCGGGTGGAGGTCGGTTTAAGAGCTATGCTGGAAACAGCATAGCAAGTTTAAATAAGGCTAGTCCGTTATCAACTTGAAAAAGTGGCACCGAGTCGGTGCTTTTTT
1|Neg_Control_Human_GA_0369|NegCtrl	AGTTGAATGGACCTCGACTA	3300	1323	1872	1619	1417	1501	1089	1027	0	3854	2124	1253	964	2725	2933	1704	5106	n/a	NegCtrl	NegCtrl|37	1|Neg_Control_Human_GA_0369|NegCtrl	NegCtrl	ACCGAGTTGAATGGACCTCGACTAGTTTAAGAGCTATGCTGGAAACAGCATAGCAAGTTTAAATAAGGCTAGTCCGTTATCAACTTGAAAAAGTGGCACCGAGTCGGTGCTTTTTT
1|Neg_Control_Human_GA_0370|NegCtrl	GAGTAATTTCGAACGTATTG	0	603	845	577	1	595	179	294	0	0	823	311	3111	1999	644	523	1558	n/a	NegCtrl	NegCtrl|37	1|Neg_Control_Human_GA_0370|NegCtrl	NegCtrl	ACCGGAGTAATTTCGAACGTATTGGTTTAAGAGCTATGCTGGAAACAGCATAGCAAGTTTAAATAAGGCTAGTCCGTTATCAACTTGAAAAAGTGGCACCGAGTCGGTGCTTTTTT
1|Neg_Control_Human_GA_0371|NegCtrl	TTCCACGGTAAAATCGGTCA	3425	992	865	600	1	471	1373	558	0	3461	903	355	1	3350	423	652	2181	n/a	NegCtrl	NegCtrl|38	1|Neg_Control_Human_GA_0371|NegCtrl	NegCtrl	ACCGTTCCACGGTAAAATCGGTCAGTTTAAGAGCTATGCTGGAAACAGCATAGCAAGTTTAAATAAGGCTAGTCCGTTATCAACTTGAAAAAGTGGCACCGAGTCGGTGCTTTTTT
1|Neg_Control_Human_GA_0372|NegCtrl	ACTGTTGCCGCGCCAACTGC	0	2424	1778	1927	0	1324	1177	968	10699	2	2374	718	3979	4563	2073	3294	4305	n/a	NegCtrl	NegCtrl|38	1|Neg_Control_Human_GA_0372|NegCtrl	NegCtrl	ACCGACTGTTGCCGCGCCAACTGCGTTTAAGAGCTATGCTGGAAACAGCATAGCAAGTTTAAATAAGGCTAGTCCGTTATCAACTTGAAAAAGTGGCACCGAGTCGGTGCTTTTTT
1|Neg_Control_Human_GA_0373|NegCtrl	CCGGCAAGAAACTATACTTG	0	1965	745	840	1	0	468	704	0	0	760	478	1	0	1246	565	1826	n/a	NegCtrl	NegCtrl|38	1|Neg_Control_Human_GA_0373|NegCtrl	NegCtrl	ACCGCCGGCAAGAAACTATACTTGGTTTAAGAGCTATGCTGGAAACAGCATAGCAAGTTTAAATAAGGCTAGTCCGTTATCAACTTGAAAAAGTGGCACCGAGTCGGTGCTTTTTT
1|Neg_Control_Human_GA_0374|NegCtrl	TAGTGGGAATGGTCGCGTAG	0	901	1617	769	0	0	672	708	0	2142	1004	582	1	1432	933	1512	2851	n/a	NegCtrl	NegCtrl|38	1|Neg_Control_Human_GA_0374|NegCtrl	NegCtrl	ACCGTAGTGGGAATGGTCGCGTAGGTTTAAGAGCTATGCTGGAAACAGCATAGCAAGTTTAAATAAGGCTAGTCCGTTATCAACTTGAAAAAGTGGCACCGAGTCGGTGCTTTTTT
1|Neg_Control_Human_GA_0375|NegCtrl	CCGCTGTCTCACTAATCTCA	0	1761	2392	2130	5444	1364	571	1300	0	1	2014	1115	1579	1381	2037	2111	4557	n/a	NegCtrl	NegCtrl|38	1|Neg_Control_Human_GA_0375|NegCtrl	NegCtrl	ACCGCCGCTGTCTCACTAATCTCAGTTTAAGAGCTATGCTGGAAACAGCATAGCAAGTTTAAATAAGGCTAGTCCGTTATCAACTTGAAAAAGTGGCACCGAGTCGGTGCTTTTTT
1|Neg_Control_Human_GA_0376|NegCtrl	TGCTACCTTCGGGACCACCA	4097	0	1267	820	1	665	418	917	3	5037	901	491	1	5431	1349	767	2450	n/a	NegCtrl	NegCtrl|38	1|Neg_Control_Human_GA_0376|NegCtrl	NegCtrl	ACCGTGCTACCTTCGGGACCACCAGTTTAAGAGCTATGCTGGAAACAGCATAGCAAGTTTAAATAAGGCTAGTCCGTTATCAACTTGAAAAAGTGGCACCGAGTCGGTGCTTTTTT
1|Neg_Control_Human_GA_0377|NegCtrl	CTTAGCTGACCGACAAGGTG	1620	2906	1485	958	1028	1025	1000	711	0	1588	905	661	2412	3	1158	2711	2683	n/a	NegCtrl	NegCtrl|38	1|Neg_Control_Human_GA_0377|NegCtrl	NegCtrl	ACCGCTTAGCTGACCGACAAGGTGGTTTAAGAGCTATGCTGGAAACAGCATAGCAAGTTTAAATAAGGCTAGTCCGTTATCAACTTGAAAAAGTGGCACCGAGTCGGTGCTTTTTT
1|Neg_Control_Human_GA_0378|NegCtrl	CTTAAGCTTATCAACATCCG	0	42	1909	2232	4	957	1953	1566	0	1	1793	1016	2649	1031	1702	1808	3895	n/a	NegCtrl	NegCtrl|38	1|Neg_Control_Human_GA_0378|NegCtrl	NegCtrl	ACCGCTTAAGCTTATCAACATCCGGTTTAAGAGCTATGCTGGAAACAGCATAGCAAGTTTAAATAAGGCTAGTCCGTTATCAACTTGAAAAAGTGGCACCGAGTCGGTGCTTTTTT
1|Neg_Control_Human_GA_0379|NegCtrl	ACGGAAAGACCTCGCTATTC	0	1317	584	561	2156	0	328	912	0	0	933	376	2	1115	603	1498	2098	n/a	NegCtrl	NegCtrl|38	1|Neg_Control_Human_GA_0379|NegCtrl	NegCtrl	ACCGACGGAAAGACCTCGCTATTCGTTTAAGAGCTATGCTGGAAACAGCATAGCAAGTTTAAATAAGGCTAGTCCGTTATCAACTTGAAAAAGTGGCACCGAGTCGGTGCTTTTTT
1|Neg_Control_Human_GA_0380|NegCtrl	CCCTTCTGGCGGGCCAAACA	0	0	542	460	0	0	300	205	0	0	602	232	0	1374	472	731	1034	n/a	NegCtrl	NegCtrl|38	1|Neg_Control_Human_GA_0380|NegCtrl	NegCtrl	ACCGCCCTTCTGGCGGGCCAAACAGTTTAAGAGCTATGCTGGAAACAGCATAGCAAGTTTAAATAAGGCTAGTCCGTTATCAACTTGAAAAAGTGGCACCGAGTCGGTGCTTTTTT
1|Neg_Control_Human_GA_0381|NegCtrl	TCTGACGATTAATGCTTCTA	0	1179	1275	977	3763	321	1203	662	0	3817	853	538	1	0	1609	1679	3060	n/a	NegCtrl	NegCtrl|39	1|Neg_Control_Human_GA_0381|NegCtrl	NegCtrl	ACCGTCTGACGATTAATGCTTCTAGTTTAAGAGCTATGCTGGAAACAGCATAGCAAGTTTAAATAAGGCTAGTCCGTTATCAACTTGAAAAAGTGGCACCGAGTCGGTGCTTTTTT
1|Neg_Control_Human_GA_0382|NegCtrl	GCGGAATGAACACGAGGTAG	1546	2590	1547	1611	0	840	2045	1574	0	648	2617	1871	0	0	1651	1801	4108	n/a	NegCtrl	NegCtrl|39	1|Neg_Control_Human_GA_0382|NegCtrl	NegCtrl	ACCGGCGGAATGAACACGAGGTAGGTTTAAGAGCTATGCTGGAAACAGCATAGCAAGTTTAAATAAGGCTAGTCCGTTATCAACTTGAAAAAGTGGCACCGAGTCGGTGCTTTTTT
1|Neg_Control_Human_GA_0383|NegCtrl	CAGACGGTTGGTAAGGACGC	1023	3154	1069	1022	1796	127	921	1185	17476	2	2141	621	10582	14	1410	3281	3646	n/a	NegCtrl	NegCtrl|39	1|Neg_Control_Human_GA_0383|NegCtrl	NegCtrl	ACCGCAGACGGTTGGTAAGGACGCGTTTAAGAGCTATGCTGGAAACAGCATAGCAAGTTTAAATAAGGCTAGTCCGTTATCAACTTGAAAAAGTGGCACCGAGTCGGTGCTTTTTT
1|Neg_Control_Human_GA_0384|NegCtrl	GGGACTGATATATGGCGAAC	3031	1893	651	857	1	972	612	617	0	0	605	228	6172	7	688	385	2764	n/a	NegCtrl	NegCtrl|39	1|Neg_Control_Human_GA_0384|NegCtrl	NegCtrl	ACCGGGGACTGATATATGGCGAACGTTTAAGAGCTATGCTGGAAACAGCATAGCAAGTTTAAATAAGGCTAGTCCGTTATCAACTTGAAAAAGTGGCACCGAGTCGGTGCTTTTTT
1|Neg_Control_Human_GA_0385|NegCtrl	CAGGTTTGCACGCATAGCTA	0	1740	1678	1558	568	930	1120	1123	0	0	2338	1092	1	2612	1344	2647	4623	n/a	NegCtrl	NegCtrl|39	1|Neg_Control_Human_GA_0385|NegCtrl	NegCtrl	ACCGCAGGTTTGCACGCATAGCTAGTTTAAGAGCTATGCTGGAAACAGCATAGCAAGTTTAAATAAGGCTAGTCCGTTATCAACTTGAAAAAGTGGCACCGAGTCGGTGCTTTTTT
1|Neg_Control_Human_GA_0386|NegCtrl	GGCCGTCGTATTCCCCCAAG	3452	1914	1288	1380	1809	753	2180	1663	1	2355	1299	1183	5196	539	845	1306	3620	n/a	NegCtrl	NegCtrl|39	1|Neg_Control_Human_GA_0386|NegCtrl	NegCtrl	ACCGGGCCGTCGTATTCCCCCAAGGTTTAAGAGCTATGCTGGAAACAGCATAGCAAGTTTAAATAAGGCTAGTCCGTTATCAACTTGAAAAAGTGGCACCGAGTCGGTGCTTTTTT
1|Neg_Control_Human_GA_0387|NegCtrl	CTCCCATTGATCTACGATGG	0	2439	1233	664	1	643	755	754	0	0	1367	522	2638	0	736	1371	2399	n/a	NegCtrl	NegCtrl|39	1|Neg_Control_Human_GA_0387|NegCtrl	NegCtrl	ACCGCTCCCATTGATCTACGATGGGTTTAAGAGCTATGCTGGAAACAGCATAGCAAGTTTAAATAAGGCTAGTCCGTTATCAACTTGAAAAAGTGGCACCGAGTCGGTGCTTTTTT
1|Neg_Control_Human_GA_0388|NegCtrl	TTTCGTGCCGATGTAACACA	0	442	1164	795	1	450	1115	794	0	0	881	731	1	2204	641	1598	2237	n/a	NegCtrl	NegCtrl|39	1|Neg_Control_Human_GA_0388|NegCtrl	NegCtrl	ACCGTTTCGTGCCGATGTAACACAGTTTAAGAGCTATGCTGGAAACAGCATAGCAAGTTTAAATAAGGCTAGTCCGTTATCAACTTGAAAAAGTGGCACCGAGTCGGTGCTTTTTT
1|Neg_Control_Human_GA_0389|NegCtrl	ATCACGTGATCGGATGGTTC	0	0	721	693	848	567	1266	594	0	0	1251	403	1553	2931	714	632	2077	n/a	NegCtrl	NegCtrl|39	1|Neg_Control_Human_GA_0389|NegCtrl	NegCtrl	ACCGATCACGTGATCGGATGGTTCGTTTAAGAGCTATGCTGGAAACAGCATAGCAAGTTTAAATAAGGCTAGTCCGTTATCAACTTGAAAAAGTGGCACCGAGTCGGTGCTTTTTT
1|Neg_Control_Human_GA_0390|NegCtrl	GCCTATCGGCATTCCCACTG	1	3155	1055	1135	2498	211	2300	1312	0	2450	1111	1189	6215	1210	986	938	3555	n/a	NegCtrl	NegCtrl|39	1|Neg_Control_Human_GA_0390|NegCtrl	NegCtrl	ACCGGCCTATCGGCATTCCCACTGGTTTAAGAGCTATGCTGGAAACAGCATAGCAAGTTTAAATAAGGCTAGTCCGTTATCAACTTGAAAAAGTGGCACCGAGTCGGTGCTTTTTT
1|Neg_Control_Human_GA_0391|NegCtrl	CAACGACGGGCCTAGTCTCA	0	607	1172	1002	2	416	812	843	0	14	1646	1194	1051	5014	1473	1834	2987	n/a	NegCtrl	NegCtrl|40	1|Neg_Control_Human_GA_0391|NegCtrl	NegCtrl	ACCGCAACGACGGGCCTAGTCTCAGTTTAAGAGCTATGCTGGAAACAGCATAGCAAGTTTAAATAAGGCTAGTCCGTTATCAACTTGAAAAAGTGGCACCGAGTCGGTGCTTTTTT
1|Neg_Control_Human_GA_0392|NegCtrl	ATATTTCGGCAGTTGCAGCA	9276	283	1164	948	2300	1	592	851	0	0	1922	756	2	1219	1886	1280	3164	n/a	NegCtrl	NegCtrl|40	1|Neg_Control_Human_GA_0392|NegCtrl	NegCtrl	ACCGATATTTCGGCAGTTGCAGCAGTTTAAGAGCTATGCTGGAAACAGCATAGCAAGTTTAAATAAGGCTAGTCCGTTATCAACTTGAAAAAGTGGCACCGAGTCGGTGCTTTTTT
1|Neg_Control_Human_GA_0393|NegCtrl	GATATCCCGCGAAAAAATCT	0	875	611	632	0	485	195	396	0	1792	754	500	1	2	300	894	1893	n/a	NegCtrl	NegCtrl|40	1|Neg_Control_Human_GA_0393|NegCtrl	NegCtrl	ACCGGATATCCCGCGAAAAAATCTGTTTAAGAGCTATGCTGGAAACAGCATAGCAAGTTTAAATAAGGCTAGTCCGTTATCAACTTGAAAAAGTGGCACCGAGTCGGTGCTTTTTT
1|Neg_Control_Human_GA_0394|NegCtrl	TCACTTGTCTATACGGGGTA	0	285	801	705	1	842	961	699	0	4604	1496	1322	1324	1	932	547	2110	n/a	NegCtrl	NegCtrl|40	1|Neg_Control_Human_GA_0394|NegCtrl	NegCtrl	ACCGTCACTTGTCTATACGGGGTAGTTTAAGAGCTATGCTGGAAACAGCATAGCAAGTTTAAATAAGGCTAGTCCGTTATCAACTTGAAAAAGTGGCACCGAGTCGGTGCTTTTTT
1|Neg_Control_Human_GA_0395|NegCtrl	ATGTTATTACAGACGCGTGT	1	1414	2221	1337	1	1195	1413	1315	0	0	2294	1257	1117	1	1971	1818	6250	n/a	NegCtrl	NegCtrl|40	1|Neg_Control_Human_GA_0395|NegCtrl	NegCtrl	ACCGATGTTATTACAGACGCGTGTGTTTAAGAGCTATGCTGGAAACAGCATAGCAAGTTTAAATAAGGCTAGTCCGTTATCAACTTGAAAAAGTGGCACCGAGTCGGTGCTTTTTT
1|Neg_Control_Human_GA_0396|NegCtrl	TGGGAATTCCTCGGCCGATT	2062	0	1220	865	1	436	689	866	0	2326	847	774	5090	939	999	1621	2135	n/a	NegCtrl	NegCtrl|40	1|Neg_Control_Human_GA_0396|NegCtrl	NegCtrl	ACCGTGGGAATTCCTCGGCCGATTGTTTAAGAGCTATGCTGGAAACAGCATAGCAAGTTTAAATAAGGCTAGTCCGTTATCAACTTGAAAAAGTGGCACCGAGTCGGTGCTTTTTT
1|Neg_Control_Human_GA_0397|NegCtrl	CGCCTCTCACGTGTAGGCTT	0	1006	1253	912	0	367	314	885	0	6543	1377	889	588	1	1220	1486	2895	n/a	NegCtrl	NegCtrl|40	1|Neg_Control_Human_GA_0397|NegCtrl	NegCtrl	ACCGCGCCTCTCACGTGTAGGCTTGTTTAAGAGCTATGCTGGAAACAGCATAGCAAGTTTAAATAAGGCTAGTCCGTTATCAACTTGAAAAAGTGGCACCGAGTCGGTGCTTTTTT
1|Neg_Control_Human_GA_0398|NegCtrl	GGGCGCTAAGATATATGCCC	0	1240	734	805	404	197	451	534	0	3905	658	439	0	0	724	1106	1980	n/a	NegCtrl	NegCtrl|40	1|Neg_Control_Human_GA_0398|NegCtrl	NegCtrl	ACCGGGGCGCTAAGATATATGCCCGTTTAAGAGCTATGCTGGAAACAGCATAGCAAGTTTAAATAAGGCTAGTCCGTTATCAACTTGAAAAAGTGGCACCGAGTCGGTGCTTTTTT
1|Neg_Control_Human_GA_0399|NegCtrl	CGTCATATACACAAACGCCC	0	0	769	556	1	227	102	451	0	2012	653	580	3943	0	656	1235	2337	n/a	NegCtrl	NegCtrl|40	1|Neg_Control_Human_GA_0399|NegCtrl	NegCtrl	ACCGCGTCATATACACAAACGCCCGTTTAAGAGCTATGCTGGAAACAGCATAGCAAGTTTAAATAAGGCTAGTCCGTTATCAACTTGAAAAAGTGGCACCGAGTCGGTGCTTTTTT
1|Neg_Control_Human_GA_0400|NegCtrl	CGTTGGGCATAGCGAACACT	3427	576	1303	1326	5645	0	825	761	0	0	1187	549	2516	5902	1191	1019	3242	n/a	NegCtrl	NegCtrl|40	1|Neg_Control_Human_GA_0400|NegCtrl	NegCtrl	ACCGCGTTGGGCATAGCGAACACTGTTTAAGAGCTATGCTGGAAACAGCATAGCAAGTTTAAATAAGGCTAGTCCGTTATCAACTTGAAAAAGTGGCACCGAGTCGGTGCTTTTTT
1|Neg_Control_Human_GA_0401|NegCtrl	GCGGGGCGGTGACTTTCAAG	0	1	483	367	0	0	120	196	0	0	166	198	1	2481	628	230	1086	n/a	NegCtrl	NegCtrl|41	1|Neg_Control_Human_GA_0401|NegCtrl	NegCtrl	ACCGGCGGGGCGGTGACTTTCAAGGTTTAAGAGCTATGCTGGAAACAGCATAGCAAGTTTAAATAAGGCTAGTCCGTTATCAACTTGAAAAAGTGGCACCGAGTCGGTGCTTTTTT
1|Neg_Control_Human_GA_0402|NegCtrl	AAGGGCGTGCCCTGCGTTGT	2294	5	1386	858	2	1074	820	1071	0	1230	1014	369	2156	1465	1454	1256	2640	n/a	NegCtrl	NegCtrl|41	1|Neg_Control_Human_GA_0402|NegCtrl	NegCtrl	ACCGAAGGGCGTGCCCTGCGTTGTGTTTAAGAGCTATGCTGGAAACAGCATAGCAAGTTTAAATAAGGCTAGTCCGTTATCAACTTGAAAAAGTGGCACCGAGTCGGTGCTTTTTT
1|Neg_Control_Human_GA_0403|NegCtrl	GCGTTCCCCCACTGACGGGG	0	1295	803	585	0	0	168	533	0	0	179	217	22	2384	554	1296	1605	n/a	NegCtrl	NegCtrl|41	1|Neg_Control_Human_GA_0403|NegCtrl	NegCtrl	ACCGGCGTTCCCCCACTGACGGGGGTTTAAGAGCTATGCTGGAAACAGCATAGCAAGTTTAAATAAGGCTAGTCCGTTATCAACTTGAAAAAGTGGCACCGAGTCGGTGCTTTTTT
1|Neg_Control_Human_GA_0404|NegCtrl	GATCCAGGAGTGATCGAGTA	0	541	1511	1633	670	573	679	1221	0	0	1670	976	2575	1143	1671	1913	3391	n/a	NegCtrl	NegCtrl|41	1|Neg_Control_Human_GA_0404|NegCtrl	NegCtrl	ACCGGATCCAGGAGTGATCGAGTAGTTTAAGAGCTATGCTGGAAACAGCATAGCAAGTTTAAATAAGGCTAGTCCGTTATCAACTTGAAAAAGTGGCACCGAGTCGGTGCTTTTTT
1|Neg_Control_Human_GA_0405|NegCtrl	AGCATTTGCGCGGCAACTGT	7452	755	940	671	0	271	97	755	0	0	1030	1122	1	1090	680	757	2280	n/a	NegCtrl	NegCtrl|41	1|Neg_Control_Human_GA_0405|NegCtrl	NegCtrl	ACCGAGCATTTGCGCGGCAACTGTGTTTAAGAGCTATGCTGGAAACAGCATAGCAAGTTTAAATAAGGCTAGTCCGTTATCAACTTGAAAAAGTGGCACCGAGTCGGTGCTTTTTT
1|Neg_Control_Human_GA_0406|NegCtrl	TTGTCCCTGAGAAAACGCGG	0	0	1110	908	2	616	254	827	0	0	690	242	0	0	1023	1498	1752	n/a	NegCtrl	NegCtrl|41	1|Neg_Control_Human_GA_0406|NegCtrl	NegCtrl	ACCGTTGTCCCTGAGAAAACGCGGGTTTAAGAGCTATGCTGGAAACAGCATAGCAAGTTTAAATAAGGCTAGTCCGTTATCAACTTGAAAAAGTGGCACCGAGTCGGTGCTTTTTT
1|Neg_Control_Human_GA_0407|NegCtrl	GTCCTCATCCGGTCAGGCTG	0	883	1699	1539	1	784	882	1185	1	5255	1350	1365	1633	2714	2261	1736	4271	n/a	NegCtrl	NegCtrl|41	1|Neg_Control_Human_GA_0407|NegCtrl	NegCtrl	ACCGGTCCTCATCCGGTCAGGCTGGTTTAAGAGCTATGCTGGAAACAGCATAGCAAGTTTAAATAAGGCTAGTCCGTTATCAACTTGAAAAAGTGGCACCGAGTCGGTGCTTTTTT
1|Neg_Control_Human_GA_0408|NegCtrl	TATAGCTGTTTCGAAGGCGC	0	1092	1204	1165	976	307	1094	536	0	0	1007	564	2150	3	730	1023	3069	n/a	NegCtrl	NegCtrl|41	1|Neg_Control_Human_GA_0408|NegCtrl	NegCtrl	ACCGTATAGCTGTTTCGAAGGCGCGTTTAAGAGCTATGCTGGAAACAGCATAGCAAGTTTAAATAAGGCTAGTCCGTTATCAACTTGAAAAAGTGGCACCGAGTCGGTGCTTTTTT
1|Neg_Control_Human_GA_0409|NegCtrl	CGTGGTAGGGGTTTCCTCAA	0	0	501	648	1	413	557	728	0	0	847	175	1	0	628	316	1540	n/a	NegCtrl	NegCtrl|41	1|Neg_Control_Human_GA_0409|NegCtrl	NegCtrl	ACCGCGTGGTAGGGGTTTCCTCAAGTTTAAGAGCTATGCTGGAAACAGCATAGCAAGTTTAAATAAGGCTAGTCCGTTATCAACTTGAAAAAGTGGCACCGAGTCGGTGCTTTTTT
1|Neg_Control_Human_GA_0410|NegCtrl	CCATCACCGATCGTGAGCCT	2	2849	2581	2251	1333	1846	1854	2003	0	5209	2891	1596	10123	5310	2232	4274	5909	n/a	NegCtrl	NegCtrl|41	1|Neg_Control_Human_GA_0410|NegCtrl	NegCtrl	ACCGCCATCACCGATCGTGAGCCTGTTTAAGAGCTATGCTGGAAACAGCATAGCAAGTTTAAATAAGGCTAGTCCGTTATCAACTTGAAAAAGTGGCACCGAGTCGGTGCTTTTTT
1|Neg_Control_Human_GA_0411|NegCtrl	TGAATCGTAACCTCGCCATT	0	18	749	719	3	514	679	1097	0	2722	821	491	5415	1085	902	1009	2447	n/a	NegCtrl	NegCtrl|42	1|Neg_Control_Human_GA_0411|NegCtrl	NegCtrl	ACCGTGAATCGTAACCTCGCCATTGTTTAAGAGCTATGCTGGAAACAGCATAGCAAGTTTAAATAAGGCTAGTCCGTTATCAACTTGAAAAAGTGGCACCGAGTCGGTGCTTTTTT
1|Neg_Control_Human_GA_0412|NegCtrl	AAGAAGGGCCGTACCCGAAA	0	214	986	694	7	441	142	552	1	2753	1494	592	1	0	1097	1670	2345	n/a	NegCtrl	NegCtrl|42	1|Neg_Control_Human_GA_0412|NegCtrl	NegCtrl	ACCGAAGAAGGGCCGTACCCGAAAGTTTAAGAGCTATGCTGGAAACAGCATAGCAAGTTTAAATAAGGCTAGTCCGTTATCAACTTGAAAAAGTGGCACCGAGTCGGTGCTTTTTT
1|Neg_Control_Human_GA_0413|NegCtrl	CGTGTTTGGAATTTGCCGCG	0	42	1243	1168	1619	558	503	1013	0	1655	1995	746	2357	2621	1706	1975	3294	n/a	NegCtrl	NegCtrl|42	1|Neg_Control_Human_GA_0413|NegCtrl	NegCtrl	ACCGCGTGTTTGGAATTTGCCGCGGTTTAAGAGCTATGCTGGAAACAGCATAGCAAGTTTAAATAAGGCTAGTCCGTTATCAACTTGAAAAAGTGGCACCGAGTCGGTGCTTTTTT
1|Neg_Control_Human_GA_0414|NegCtrl	CAAGTGAGCATAAGCGATGT	0	621	1068	730	3514	509	1651	917	0	0	537	388	1	0	1061	2164	3094	n/a	NegCtrl	NegCtrl|42	1|Neg_Control_Human_GA_0414|NegCtrl	NegCtrl	ACCGCAAGTGAGCATAAGCGATGTGTTTAAGAGCTATGCTGGAAACAGCATAGCAAGTTTAAATAAGGCTAGTCCGTTATCAACTTGAAAAAGTGGCACCGAGTCGGTGCTTTTTT
1|Neg_Control_Human_GA_0415|NegCtrl	AGGACTAGTGTCGCACTCAG	2518	1645	917	985	0	333	2001	687	0	0	1099	565	3208	1730	1256	2272	2392	n/a	NegCtrl	NegCtrl|42	1|Neg_Control_Human_GA_0415|NegCtrl	NegCtrl	ACCGAGGACTAGTGTCGCACTCAGGTTTAAGAGCTATGCTGGAAACAGCATAGCAAGTTTAAATAAGGCTAGTCCGTTATCAACTTGAAAAAGTGGCACCGAGTCGGTGCTTTTTT
1|Neg_Control_Human_GA_0416|NegCtrl	GGCACTCCGAAAGACCTTAT	0	2417	1451	1098	1	232	1630	988	0	4012	2326	572	1	1463	1123	1515	3116	n/a	NegCtrl	NegCtrl|42	1|Neg_Control_Human_GA_0416|NegCtrl	NegCtrl	ACCGGGCACTCCGAAAGACCTTATGTTTAAGAGCTATGCTGGAAACAGCATAGCAAGTTTAAATAAGGCTAGTCCGTTATCAACTTGAAAAAGTGGCACCGAGTCGGTGCTTTTTT
1|Neg_Control_Human_GA_0417|NegCtrl	CCCAGGTGTATAATGAAACG	846	746	694	841	0	342	301	689	0	0	736	543	1610	3	736	1928	2416	n/a	NegCtrl	NegCtrl|42	1|Neg_Control_Human_GA_0417|NegCtrl	NegCtrl	ACCGCCCAGGTGTATAATGAAACGGTTTAAGAGCTATGCTGGAAACAGCATAGCAAGTTTAAATAAGGCTAGTCCGTTATCAACTTGAAAAAGTGGCACCGAGTCGGTGCTTTTTT
1|Neg_Control_Human_GA_0418|NegCtrl	GACCGCAAAGTGGTCCGAAG	1	525	289	341	1247	0	48	356	0	0	561	238	0	1025	414	471	1250	n/a	NegCtrl	NegCtrl|42	1|Neg_Control_Human_GA_0418|NegCtrl	NegCtrl	ACCGGACCGCAAAGTGGTCCGAAGGTTTAAGAGCTATGCTGGAAACAGCATAGCAAGTTTAAATAAGGCTAGTCCGTTATCAACTTGAAAAAGTGGCACCGAGTCGGTGCTTTTTT
1|Neg_Control_Human_GA_0419|NegCtrl	GTTGCGAGTTACTATTGGTT	1	0	645	500	0	246	313	537	0	1254	983	521	6240	1040	575	625	1976	n/a	NegCtrl	NegCtrl|42	1|Neg_Control_Human_GA_0419|NegCtrl	NegCtrl	ACCGGTTGCGAGTTACTATTGGTTGTTTAAGAGCTATGCTGGAAACAGCATAGCAAGTTTAAATAAGGCTAGTCCGTTATCAACTTGAAAAAGTGGCACCGAGTCGGTGCTTTTTT
1|Neg_Control_Human_GA_0420|NegCtrl	TCTAAAGCCGTCCTGATGTT	3986	1009	707	798	1	0	337	282	0	1852	1166	254	0	0	558	798	1784	n/a	NegCtrl	NegCtrl|42	1|Neg_Control_Human_GA_0420|NegCtrl	NegCtrl	ACCGTCTAAAGCCGTCCTGATGTTGTTTAAGAGCTATGCTGGAAACAGCATAGCAAGTTTAAATAAGGCTAGTCCGTTATCAACTTGAAAAAGTGGCACCGAGTCGGTGCTTTTTT
1|Neg_Control_Human_GA_0421|NegCtrl	GCCGTGGTATCAAGTCGGTA	4199	1571	769	953	2707	208	733	654	0	0	808	356	3878	4	715	919	2219	n/a	NegCtrl	NegCtrl|43	1|Neg_Control_Human_GA_0421|NegCtrl	NegCtrl	ACCGGCCGTGGTATCAAGTCGGTAGTTTAAGAGCTATGCTGGAAACAGCATAGCAAGTTTAAATAAGGCTAGTCCGTTATCAACTTGAAAAAGTGGCACCGAGTCGGTGCTTTTTT
1|Neg_Control_Human_GA_0422|NegCtrl	CGCAATCCCTTAGGATAGCC	8203	3676	2949	3243	1	1403	2030	1764	0	1911	3703	1777	5802	3048	3815	3472	7064	n/a	NegCtrl	NegCtrl|43	1|Neg_Control_Human_GA_0422|NegCtrl	NegCtrl	ACCGCGCAATCCCTTAGGATAGCCGTTTAAGAGCTATGCTGGAAACAGCATAGCAAGTTTAAATAAGGCTAGTCCGTTATCAACTTGAAAAAGTGGCACCGAGTCGGTGCTTTTTT
1|Neg_Control_Human_GA_0423|NegCtrl	TTTGGGTTTATCCGCCCCCA	0	1209	1160	873	1	861	1079	1140	12169	1	2034	619	2	2464	1601	1600	3165	n/a	NegCtrl	NegCtrl|43	1|Neg_Control_Human_GA_0423|NegCtrl	NegCtrl	ACCGTTTGGGTTTATCCGCCCCCAGTTTAAGAGCTATGCTGGAAACAGCATAGCAAGTTTAAATAAGGCTAGTCCGTTATCAACTTGAAAAAGTGGCACCGAGTCGGTGCTTTTTT
1|Neg_Control_Human_GA_0424|NegCtrl	CTAGAGGGGTATAGCAACAA	0	1	1111	723	1	1907	595	696	19033	0	1468	602	2895	2	949	1999	2079	n/a	NegCtrl	NegCtrl|43	1|Neg_Control_Human_GA_0424|NegCtrl	NegCtrl	ACCGCTAGAGGGGTATAGCAACAAGTTTAAGAGCTATGCTGGAAACAGCATAGCAAGTTTAAATAAGGCTAGTCCGTTATCAACTTGAAAAAGTGGCACCGAGTCGGTGCTTTTTT
1|Neg_Control_Human_GA_0425|NegCtrl	CTCGGGACTAACGTGAGAGC	0	2483	1320	860	1303	954	1144	869	0	0	1553	786	1719	3	847	1467	2863	n/a	NegCtrl	NegCtrl|43	1|Neg_Control_Human_GA_0425|NegCtrl	NegCtrl	ACCGCTCGGGACTAACGTGAGAGCGTTTAAGAGCTATGCTGGAAACAGCATAGCAAGTTTAAATAAGGCTAGTCCGTTATCAACTTGAAAAAGTGGCACCGAGTCGGTGCTTTTTT
1|Neg_Control_Human_GA_0426|NegCtrl	CCCCGTAGCTCATTAGTCTG	1	1	1690	1372	1	1436	237	840	0	0	1185	1083	1188	2	1164	1192	3420	n/a	NegCtrl	NegCtrl|43	1|Neg_Control_Human_GA_0426|NegCtrl	NegCtrl	ACCGCCCCGTAGCTCATTAGTCTGGTTTAAGAGCTATGCTGGAAACAGCATAGCAAGTTTAAATAAGGCTAGTCCGTTATCAACTTGAAAAAGTGGCACCGAGTCGGTGCTTTTTT
1|Neg_Control_Human_GA_0427|NegCtrl	GAAAACACGATGACGTCTCT	2654	1266	1575	1261	1654	650	1120	1352	0	0	2245	775	2118	2	865	1406	3784	n/a	NegCtrl	NegCtrl|43	1|Neg_Control_Human_GA_0427|NegCtrl	NegCtrl	ACCGGAAAACACGATGACGTCTCTGTTTAAGAGCTATGCTGGAAACAGCATAGCAAGTTTAAATAAGGCTAGTCCGTTATCAACTTGAAAAAGTGGCACCGAGTCGGTGCTTTTTT
1|Neg_Control_Human_GA_0428|NegCtrl	GACGCCCTAATGCCCATCGT	8408	2878	2454	2265	1430	1288	1595	2074	15246	4149	3923	2157	6986	3417	3220	3084	6364	n/a	NegCtrl	NegCtrl|43	1|Neg_Control_Human_GA_0428|NegCtrl	NegCtrl	ACCGGACGCCCTAATGCCCATCGTGTTTAAGAGCTATGCTGGAAACAGCATAGCAAGTTTAAATAAGGCTAGTCCGTTATCAACTTGAAAAAGTGGCACCGAGTCGGTGCTTTTTT
1|Neg_Control_Human_GA_0429|NegCtrl	GGATATTGAGTAAACCCGAT	0	336	793	806	2	690	767	587	0	0	1160	577	0	1461	1166	1580	2626	n/a	NegCtrl	NegCtrl|43	1|Neg_Control_Human_GA_0429|NegCtrl	NegCtrl	ACCGGGATATTGAGTAAACCCGATGTTTAAGAGCTATGCTGGAAACAGCATAGCAAGTTTAAATAAGGCTAGTCCGTTATCAACTTGAAAAAGTGGCACCGAGTCGGTGCTTTTTT
1|Neg_Control_Human_GA_0430|NegCtrl	TGACTCGGGCAATATCGGTT	0	262	766	637	0	1152	493	759	0	0	1196	565	2	2081	1266	2184	2395	n/a	NegCtrl	NegCtrl|43	1|Neg_Control_Human_GA_0430|NegCtrl	NegCtrl	ACCGTGACTCGGGCAATATCGGTTGTTTAAGAGCTATGCTGGAAACAGCATAGCAAGTTTAAATAAGGCTAGTCCGTTATCAACTTGAAAAAGTGGCACCGAGTCGGTGCTTTTTT
1|Neg_Control_Human_GA_0431|NegCtrl	GATCTAGTCCTCTAATCGAT	5401	856	583	718	2917	0	837	577	0	0	814	451	0	0	347	611	1898	n/a	NegCtrl	NegCtrl|44	1|Neg_Control_Human_GA_0431|NegCtrl	NegCtrl	ACCGGATCTAGTCCTCTAATCGATGTTTAAGAGCTATGCTGGAAACAGCATAGCAAGTTTAAATAAGGCTAGTCCGTTATCAACTTGAAAAAGTGGCACCGAGTCGGTGCTTTTTT
1|Neg_Control_Human_GA_0432|NegCtrl	CATAAGGTTAACTGCGTGGA	0	2288	951	1050	1150	0	332	599	70	0	1103	246	0	2831	794	874	2759	n/a	NegCtrl	NegCtrl|44	1|Neg_Control_Human_GA_0432|NegCtrl	NegCtrl	ACCGCATAAGGTTAACTGCGTGGAGTTTAAGAGCTATGCTGGAAACAGCATAGCAAGTTTAAATAAGGCTAGTCCGTTATCAACTTGAAAAAGTGGCACCGAGTCGGTGCTTTTTT
1|Neg_Control_Human_GA_0433|NegCtrl	GGTACCTGAACAACGGCACC	1867	1102	2118	1889	6259	483	1354	1829	0	2089	1570	1211	694	1074	1717	2337	4797	n/a	NegCtrl	NegCtrl|44	1|Neg_Control_Human_GA_0433|NegCtrl	NegCtrl	ACCGGGTACCTGAACAACGGCACCGTTTAAGAGCTATGCTGGAAACAGCATAGCAAGTTTAAATAAGGCTAGTCCGTTATCAACTTGAAAAAGTGGCACCGAGTCGGTGCTTTTTT
1|Neg_Control_Human_GA_0434|NegCtrl	TGGCGGCCCAAACTTAACAC	1677	2494	1235	1182	4	1534	1445	1299	0	2776	2257	728	131	1982	1481	1578	3235	n/a	NegCtrl	NegCtrl|44	1|Neg_Control_Human_GA_0434|NegCtrl	NegCtrl	ACCGTGGCGGCCCAAACTTAACACGTTTAAGAGCTATGCTGGAAACAGCATAGCAAGTTTAAATAAGGCTAGTCCGTTATCAACTTGAAAAAGTGGCACCGAGTCGGTGCTTTTTT
1|Neg_Control_Human_GA_0435|NegCtrl	GGGCGGTCAGGTCGCTCCGA	0	321	455	479	0	968	233	450	0	0	703	278	0	716	443	1171	1429	n/a	NegCtrl	NegCtrl|44	1|Neg_Control_Human_GA_0435|NegCtrl	NegCtrl	ACCGGGGCGGTCAGGTCGCTCCGAGTTTAAGAGCTATGCTGGAAACAGCATAGCAAGTTTAAATAAGGCTAGTCCGTTATCAACTTGAAAAAGTGGCACCGAGTCGGTGCTTTTTT
1|Neg_Control_Human_GA_0436|NegCtrl	TCCGGAGGCTCAAACCAAGT	1	482	799	830	2	1362	81	502	10031	1483	982	235	0	0	1239	960	1713	n/a	NegCtrl	NegCtrl|44	1|Neg_Control_Human_GA_0436|NegCtrl	NegCtrl	ACCGTCCGGAGGCTCAAACCAAGTGTTTAAGAGCTATGCTGGAAACAGCATAGCAAGTTTAAATAAGGCTAGTCCGTTATCAACTTGAAAAAGTGGCACCGAGTCGGTGCTTTTTT
1|Neg_Control_Human_GA_0437|NegCtrl	GCTTGCTATATGGGTGCGAG	0	2496	2537	2102	1457	1003	914	1685	9953	0	2206	1374	1496	829	3021	3498	4635	n/a	NegCtrl	NegCtrl|44	1|Neg_Control_Human_GA_0437|NegCtrl	NegCtrl	ACCGGCTTGCTATATGGGTGCGAGGTTTAAGAGCTATGCTGGAAACAGCATAGCAAGTTTAAATAAGGCTAGTCCGTTATCAACTTGAAAAAGTGGCACCGAGTCGGTGCTTTTTT
1|Neg_Control_Human_GA_0438|NegCtrl	TCGGCTACGGCGTGGAGAAG	0	305	1003	725	1	636	605	354	1	3606	1147	1050	1985	0	779	1137	2262	n/a	NegCtrl	NegCtrl|44	1|Neg_Control_Human_GA_0438|NegCtrl	NegCtrl	ACCGTCGGCTACGGCGTGGAGAAGGTTTAAGAGCTATGCTGGAAACAGCATAGCAAGTTTAAATAAGGCTAGTCCGTTATCAACTTGAAAAAGTGGCACCGAGTCGGTGCTTTTTT
1|Neg_Control_Human_GA_0439|NegCtrl	CCCGTGGCGTGCGCACCTGT	0	1699	996	975	0	655	1082	792	0	2097	1506	1088	1	0	1191	1594	3323	n/a	NegCtrl	NegCtrl|44	1|Neg_Control_Human_GA_0439|NegCtrl	NegCtrl	ACCGCCCGTGGCGTGCGCACCTGTGTTTAAGAGCTATGCTGGAAACAGCATAGCAAGTTTAAATAAGGCTAGTCCGTTATCAACTTGAAAAAGTGGCACCGAGTCGGTGCTTTTTT
1|Neg_Control_Human_GA_0440|NegCtrl	GGCTGGTTGACGACTCCTGA	2321	1536	964	944	1	774	873	790	0	1035	1430	870	1865	2	574	1862	2697	n/a	NegCtrl	NegCtrl|44	1|Neg_Control_Human_GA_0440|NegCtrl	NegCtrl	ACCGGGCTGGTTGACGACTCCTGAGTTTAAGAGCTATGCTGGAAACAGCATAGCAAGTTTAAATAAGGCTAGTCCGTTATCAACTTGAAAAAGTGGCACCGAGTCGGTGCTTTTTT
1|Neg_Control_Human_GA_0441|NegCtrl	GGTGCGGTCTGCTTGTAGAT	0	455	1430	950	2	282	779	982	9202	0	2320	534	1	935	1711	1066	2850	n/a	NegCtrl	NegCtrl|45	1|Neg_Control_Human_GA_0441|NegCtrl	NegCtrl	ACCGGGTGCGGTCTGCTTGTAGATGTTTAAGAGCTATGCTGGAAACAGCATAGCAAGTTTAAATAAGGCTAGTCCGTTATCAACTTGAAAAAGTGGCACCGAGTCGGTGCTTTTTT
1|Neg_Control_Human_GA_0442|NegCtrl	TGCCTATGACCTAGGTACCA	0	558	519	747	0	0	671	508	0	1	950	832	0	0	1661	895	2355	n/a	NegCtrl	NegCtrl|45	1|Neg_Control_Human_GA_0442|NegCtrl	NegCtrl	ACCGTGCCTATGACCTAGGTACCAGTTTAAGAGCTATGCTGGAAACAGCATAGCAAGTTTAAATAAGGCTAGTCCGTTATCAACTTGAAAAAGTGGCACCGAGTCGGTGCTTTTTT
1|Neg_Control_Human_GA_0443|NegCtrl	GACAGATCACGTATCAGGGC	2	2481	846	988	1460	308	435	921	0	0	1331	673	0	0	862	1159	2502	n/a	NegCtrl	NegCtrl|45	1|Neg_Control_Human_GA_0443|NegCtrl	NegCtrl	ACCGGACAGATCACGTATCAGGGCGTTTAAGAGCTATGCTGGAAACAGCATAGCAAGTTTAAATAAGGCTAGTCCGTTATCAACTTGAAAAAGTGGCACCGAGTCGGTGCTTTTTT
1|Neg_Control_Human_GA_0444|NegCtrl	GAGGTATGTCATCGCCATGA	4688	1134	841	648	1	327	940	391	0	0	1052	718	1775	1918	1175	648	2392	n/a	NegCtrl	NegCtrl|45	1|Neg_Control_Human_GA_0444|NegCtrl	NegCtrl	ACCGGAGGTATGTCATCGCCATGAGTTTAAGAGCTATGCTGGAAACAGCATAGCAAGTTTAAATAAGGCTAGTCCGTTATCAACTTGAAAAAGTGGCACCGAGTCGGTGCTTTTTT
1|Neg_Control_Human_GA_0445|NegCtrl	GCCATTCTAGTCCCGGCATA	0	649	1242	1124	2	1489	1536	1212	1	3177	1711	1185	3405	2942	1198	1865	2888	n/a	NegCtrl	NegCtrl|45	1|Neg_Control_Human_GA_0445|NegCtrl	NegCtrl	ACCGGCCATTCTAGTCCCGGCATAGTTTAAGAGCTATGCTGGAAACAGCATAGCAAGTTTAAATAAGGCTAGTCCGTTATCAACTTGAAAAAGTGGCACCGAGTCGGTGCTTTTTT
1|Neg_Control_Human_GA_0446|NegCtrl	TGAATCGAATACAAACGATG	2	786	1187	616	1	0	144	417	0	3634	1475	608	940	2152	1022	1914	2369	n/a	NegCtrl	NegCtrl|45	1|Neg_Control_Human_GA_0446|NegCtrl	NegCtrl	ACCGTGAATCGAATACAAACGATGGTTTAAGAGCTATGCTGGAAACAGCATAGCAAGTTTAAATAAGGCTAGTCCGTTATCAACTTGAAAAAGTGGCACCGAGTCGGTGCTTTTTT
1|Neg_Control_Human_GA_0447|NegCtrl	GTTACGTACCCTCCAACTTC	4209	1229	1419	1455	1	0	920	1150	0	2329	1349	1052	0	1167	1209	2060	3332	n/a	NegCtrl	NegCtrl|45	1|Neg_Control_Human_GA_0447|NegCtrl	NegCtrl	ACCGGTTACGTACCCTCCAACTTCGTTTAAGAGCTATGCTGGAAACAGCATAGCAAGTTTAAATAAGGCTAGTCCGTTATCAACTTGAAAAAGTGGCACCGAGTCGGTGCTTTTTT
1|Neg_Control_Human_GA_0448|NegCtrl	CCAATGATAAGCCCGAACGG	0	909	1047	1036	2	1160	1215	827	0	0	1423	532	4	2210	1263	2630	2760	n/a	NegCtrl	NegCtrl|45	1|Neg_Control_Human_GA_0448|NegCtrl	NegCtrl	ACCGCCAATGATAAGCCCGAACGGGTTTAAGAGCTATGCTGGAAACAGCATAGCAAGTTTAAATAAGGCTAGTCCGTTATCAACTTGAAAAAGTGGCACCGAGTCGGTGCTTTTTT
1|Neg_Control_Human_GA_0449|NegCtrl	AGCGATTCACGTATTAGATG	0	3172	945	871	3	260	280	853	0	0	993	715	2	1091	1174	2041	2588	n/a	NegCtrl	NegCtrl|45	1|Neg_Control_Human_GA_0449|NegCtrl	NegCtrl	ACCGAGCGATTCACGTATTAGATGGTTTAAGAGCTATGCTGGAAACAGCATAGCAAGTTTAAATAAGGCTAGTCCGTTATCAACTTGAAAAAGTGGCACCGAGTCGGTGCTTTTTT
1|Neg_Control_Human_GA_0450|NegCtrl	GCCAACAAGAATCGGATCCC	3	1017	1150	569	2	1146	374	720	1	2114	846	654	0	0	1494	1656	2816	n/a	NegCtrl	NegCtrl|45	1|Neg_Control_Human_GA_0450|NegCtrl	NegCtrl	ACCGGCCAACAAGAATCGGATCCCGTTTAAGAGCTATGCTGGAAACAGCATAGCAAGTTTAAATAAGGCTAGTCCGTTATCAACTTGAAAAAGTGGCACCGAGTCGGTGCTTTTTT
1|Neg_Control_Human_GA_0451|NegCtrl	ACTTACGGCACTCGCATGCC	1	1970	1089	741	1	0	1193	951	0	570	1638	1179	0	1830	1156	885	2931	n/a	NegCtrl	NegCtrl|46	1|Neg_Control_Human_GA_0451|NegCtrl	NegCtrl	ACCGACTTACGGCACTCGCATGCCGTTTAAGAGCTATGCTGGAAACAGCATAGCAAGTTTAAATAAGGCTAGTCCGTTATCAACTTGAAAAAGTGGCACCGAGTCGGTGCTTTTTT
1|Neg_Control_Human_GA_0452|NegCtrl	GATATGGCTCGAGTAATCTT	1	900	916	915	1	577	905	873	0	0	1139	927	3476	29	1531	2129	2121	n/a	NegCtrl	NegCtrl|46	1|Neg_Control_Human_GA_0452|NegCtrl	NegCtrl	ACCGGATATGGCTCGAGTAATCTTGTTTAAGAGCTATGCTGGAAACAGCATAGCAAGTTTAAATAAGGCTAGTCCGTTATCAACTTGAAAAAGTGGCACCGAGTCGGTGCTTTTTT
1|Neg_Control_Human_GA_0453|NegCtrl	GTATCCCATATCGGCACAGG	1	798	1867	2048	1	0	1560	1313	0	1681	1607	859	0	1451	1616	3409	3496	n/a	NegCtrl	NegCtrl|46	1|Neg_Control_Human_GA_0453|NegCtrl	NegCtrl	ACCGGTATCCCATATCGGCACAGGGTTTAAGAGCTATGCTGGAAACAGCATAGCAAGTTTAAATAAGGCTAGTCCGTTATCAACTTGAAAAAGTGGCACCGAGTCGGTGCTTTTTT
1|Neg_Control_Human_GA_0454|NegCtrl	ATGCTGCAGCTTTACGATCA	9973	1998	2637	1841	1132	1222	1125	1181	0	5603	3302	2091	2432	4911	2883	3494	4773	n/a	NegCtrl	NegCtrl|46	1|Neg_Control_Human_GA_0454|NegCtrl	NegCtrl	ACCGATGCTGCAGCTTTACGATCAGTTTAAGAGCTATGCTGGAAACAGCATAGCAAGTTTAAATAAGGCTAGTCCGTTATCAACTTGAAAAAGTGGCACCGAGTCGGTGCTTTTTT
1|Neg_Control_Human_GA_0455|NegCtrl	GAGTGATGCTTAGACTCCGT	4863	702	537	737	0	0	646	320	0	1715	667	415	1	1319	565	341	1863	n/a	NegCtrl	NegCtrl|46	1|Neg_Control_Human_GA_0455|NegCtrl	NegCtrl	ACCGGAGTGATGCTTAGACTCCGTGTTTAAGAGCTATGCTGGAAACAGCATAGCAAGTTTAAATAAGGCTAGTCCGTTATCAACTTGAAAAAGTGGCACCGAGTCGGTGCTTTTTT
1|Neg_Control_Human_GA_0456|NegCtrl	ACATACCCCCCTGGTTCAGA	0	2361	1614	1887	1	1124	1606	1525	1	2911	1792	1032	1	2063	1905	2169	3665	n/a	NegCtrl	NegCtrl|46	1|Neg_Control_Human_GA_0456|NegCtrl	NegCtrl	ACCGACATACCCCCCTGGTTCAGAGTTTAAGAGCTATGCTGGAAACAGCATAGCAAGTTTAAATAAGGCTAGTCCGTTATCAACTTGAAAAAGTGGCACCGAGTCGGTGCTTTTTT
1|Neg_Control_Human_GA_0457|NegCtrl	GCCCCTTATGATTGTTATAG	47	2552	1032	588	0	0	512	386	0	0	1586	660	0	2103	1166	1412	2017	n/a	NegCtrl	NegCtrl|46	1|Neg_Control_Human_GA_0457|NegCtrl	NegCtrl	ACCGGCCCCTTATGATTGTTATAGGTTTAAGAGCTATGCTGGAAACAGCATAGCAAGTTTAAATAAGGCTAGTCCGTTATCAACTTGAAAAAGTGGCACCGAGTCGGTGCTTTTTT
1|Neg_Control_Human_GA_0458|NegCtrl	AGGTCGGCCGAACATACGGT	1743	2430	834	925	1	222	1076	472	0	0	1032	227	0	1768	581	741	2057	n/a	NegCtrl	NegCtrl|46	1|Neg_Control_Human_GA_0458|NegCtrl	NegCtrl	ACCGAGGTCGGCCGAACATACGGTGTTTAAGAGCTATGCTGGAAACAGCATAGCAAGTTTAAATAAGGCTAGTCCGTTATCAACTTGAAAAAGTGGCACCGAGTCGGTGCTTTTTT
1|Neg_Control_Human_GA_0459|NegCtrl	ATTGCGCAATCCTTAGGATA	2324	1952	1844	1309	2016	1371	656	1184	0	1147	1965	1039	1	1657	2774	2616	4346	n/a	NegCtrl	NegCtrl|46	1|Neg_Control_Human_GA_0459|NegCtrl	NegCtrl	ACCGATTGCGCAATCCTTAGGATAGTTTAAGAGCTATGCTGGAAACAGCATAGCAAGTTTAAATAAGGCTAGTCCGTTATCAACTTGAAAAAGTGGCACCGAGTCGGTGCTTTTTT
1|Neg_Control_Human_GA_0460|NegCtrl	GAAGCGGGACCGTGTCTCAC	1	1129	1757	1606	3	0	1255	1414	10991	0	1621	1470	3248	2242	1471	2637	3952	n/a	NegCtrl	NegCtrl|46	1|Neg_Control_Human_GA_0460|NegCtrl	NegCtrl	ACCGGAAGCGGGACCGTGTCTCACGTTTAAGAGCTATGCTGGAAACAGCATAGCAAGTTTAAATAAGGCTAGTCCGTTATCAACTTGAAAAAGTGGCACCGAGTCGGTGCTTTTTT
1|Neg_Control_Human_GA_0461|NegCtrl	GTGTATGATGCTTCGACTTA	0	1321	1456	1442	2	692	1409	803	0	1682	1985	1456	2	1070	1304	3284	4288	n/a	NegCtrl	NegCtrl|47	1|Neg_Control_Human_GA_0461|NegCtrl	NegCtrl	ACCGGTGTATGATGCTTCGACTTAGTTTAAGAGCTATGCTGGAAACAGCATAGCAAGTTTAAATAAGGCTAGTCCGTTATCAACTTGAAAAAGTGGCACCGAGTCGGTGCTTTTTT
1|Neg_Control_Human_GA_0462|NegCtrl	CCTACTCCCGTGTGTTATCC	0	502	1667	1356	1	1368	856	937	0	2201	1002	1045	8377	1499	1933	1254	3632	n/a	NegCtrl	NegCtrl|47	1|Neg_Control_Human_GA_0462|NegCtrl	NegCtrl	ACCGCCTACTCCCGTGTGTTATCCGTTTAAGAGCTATGCTGGAAACAGCATAGCAAGTTTAAATAAGGCTAGTCCGTTATCAACTTGAAAAAGTGGCACCGAGTCGGTGCTTTTTT
1|Neg_Control_Human_GA_0463|NegCtrl	ACAGCCCTCACGAGCCCGAA	3053	1907	1320	923	2	901	1339	1411	1	5556	1397	827	5635	7	1425	2819	2605	n/a	NegCtrl	NegCtrl|47	1|Neg_Control_Human_GA_0463|NegCtrl	NegCtrl	ACCGACAGCCCTCACGAGCCCGAAGTTTAAGAGCTATGCTGGAAACAGCATAGCAAGTTTAAATAAGGCTAGTCCGTTATCAACTTGAAAAAGTGGCACCGAGTCGGTGCTTTTTT
1|Neg_Control_Human_GA_0464|NegCtrl	GCTGTTGTAACGGTAGATAT	1989	0	938	476	0	393	245	363	11506	1	1448	587	0	2479	860	2004	1918	n/a	NegCtrl	NegCtrl|47	1|Neg_Control_Human_GA_0464|NegCtrl	NegCtrl	ACCGGCTGTTGTAACGGTAGATATGTTTAAGAGCTATGCTGGAAACAGCATAGCAAGTTTAAATAAGGCTAGTCCGTTATCAACTTGAAAAAGTGGCACCGAGTCGGTGCTTTTTT
1|Neg_Control_Human_GA_0465|NegCtrl	TACGAAACATCATGGGTTCC	1	900	1382	1009	1613	223	107	1194	20563	2	1474	992	2	0	1545	3629	2945	n/a	NegCtrl	NegCtrl|47	1|Neg_Control_Human_GA_0465|NegCtrl	NegCtrl	ACCGTACGAAACATCATGGGTTCCGTTTAAGAGCTATGCTGGAAACAGCATAGCAAGTTTAAATAAGGCTAGTCCGTTATCAACTTGAAAAAGTGGCACCGAGTCGGTGCTTTTTT
1|Neg_Control_Human_GA_0466|NegCtrl	CGCACGACCATTGCTGCTGC	1731	386	1117	866	142	997	1605	1048	0	0	1939	1084	1	0	1038	1709	3131	n/a	NegCtrl	NegCtrl|47	1|Neg_Control_Human_GA_0466|NegCtrl	NegCtrl	ACCGCGCACGACCATTGCTGCTGCGTTTAAGAGCTATGCTGGAAACAGCATAGCAAGTTTAAATAAGGCTAGTCCGTTATCAACTTGAAAAAGTGGCACCGAGTCGGTGCTTTTTT
1|Neg_Control_Human_GA_0467|NegCtrl	CATTGCACGCCACAGCATTG	2006	1514	1179	1304	2245	550	1508	973	0	2214	1181	1371	1	0	1731	4506	3102	n/a	NegCtrl	NegCtrl|47	1|Neg_Control_Human_GA_0467|NegCtrl	NegCtrl	ACCGCATTGCACGCCACAGCATTGGTTTAAGAGCTATGCTGGAAACAGCATAGCAAGTTTAAATAAGGCTAGTCCGTTATCAACTTGAAAAAGTGGCACCGAGTCGGTGCTTTTTT
1|Neg_Control_Human_GA_0468|NegCtrl	CGATGCCCGTCTATGGCCCG	4166	2342	1523	837	1306	1042	1616	1335	0	1	1615	617	4391	2	1557	2792	3765	n/a	NegCtrl	NegCtrl|47	1|Neg_Control_Human_GA_0468|NegCtrl	NegCtrl	ACCGCGATGCCCGTCTATGGCCCGGTTTAAGAGCTATGCTGGAAACAGCATAGCAAGTTTAAATAAGGCTAGTCCGTTATCAACTTGAAAAAGTGGCACCGAGTCGGTGCTTTTTT
1|Neg_Control_Human_GA_0469|NegCtrl	CCAGCAATACCCCGGTATGG	0	1027	1082	1108	0	1154	1095	1088	0	4845	1281	1062	9620	4242	1878	2216	2951	n/a	NegCtrl	NegCtrl|47	1|Neg_Control_Human_GA_0469|NegCtrl	NegCtrl	ACCGCCAGCAATACCCCGGTATGGGTTTAAGAGCTATGCTGGAAACAGCATAGCAAGTTTAAATAAGGCTAGTCCGTTATCAACTTGAAAAAGTGGCACCGAGTCGGTGCTTTTTT
1|Neg_Control_Human_GA_0470|NegCtrl	TCGAGATGCGCAGCAGATGA	0	0	1405	1048	0	344	512	350	0	0	1833	829	1	0	673	2096	2279	n/a	NegCtrl	NegCtrl|47	1|Neg_Control_Human_GA_0470|NegCtrl	NegCtrl	ACCGTCGAGATGCGCAGCAGATGAGTTTAAGAGCTATGCTGGAAACAGCATAGCAAGTTTAAATAAGGCTAGTCCGTTATCAACTTGAAAAAGTGGCACCGAGTCGGTGCTTTTTT
1|Neg_Control_Human_GA_0471|NegCtrl	ACGGGGTGAAACCATGTCGT	0	468	529	473	1	7	225	338	0	0	1148	613	3021	1	1075	521	1996	n/a	NegCtrl	NegCtrl|48	1|Neg_Control_Human_GA_0471|NegCtrl	NegCtrl	ACCGACGGGGTGAAACCATGTCGTGTTTAAGAGCTATGCTGGAAACAGCATAGCAAGTTTAAATAAGGCTAGTCCGTTATCAACTTGAAAAAGTGGCACCGAGTCGGTGCTTTTTT
1|Neg_Control_Human_GA_0472|NegCtrl	CCTTGGCGAGACGGAGGTAC	0	622	998	814	2	309	1147	800	0	0	719	990	2791	1925	1260	951	2120	n/a	NegCtrl	NegCtrl|48	1|Neg_Control_Human_GA_0472|NegCtrl	NegCtrl	ACCGCCTTGGCGAGACGGAGGTACGTTTAAGAGCTATGCTGGAAACAGCATAGCAAGTTTAAATAAGGCTAGTCCGTTATCAACTTGAAAAAGTGGCACCGAGTCGGTGCTTTTTT
1|Neg_Control_Human_GA_0473|NegCtrl	CCATAGCTCTAGCGATAAAC	1905	0	1014	1071	0	15	552	612	0	0	1225	562	0	1600	598	1501	3774	n/a	NegCtrl	NegCtrl|48	1|Neg_Control_Human_GA_0473|NegCtrl	NegCtrl	ACCGCCATAGCTCTAGCGATAAACGTTTAAGAGCTATGCTGGAAACAGCATAGCAAGTTTAAATAAGGCTAGTCCGTTATCAACTTGAAAAAGTGGCACCGAGTCGGTGCTTTTTT
1|Neg_Control_Human_GA_0474|NegCtrl	AGCTAGCGATGGCTCTAAGT	0	860	565	894	0	548	496	259	0	6222	1141	523	1	1161	1317	1760	2409	n/a	NegCtrl	NegCtrl|48	1|Neg_Control_Human_GA_0474|NegCtrl	NegCtrl	ACCGAGCTAGCGATGGCTCTAAGTGTTTAAGAGCTATGCTGGAAACAGCATAGCAAGTTTAAATAAGGCTAGTCCGTTATCAACTTGAAAAAGTGGCACCGAGTCGGTGCTTTTTT
1|Neg_Control_Human_GA_0475|NegCtrl	GGTCCGCGCACAAGAGCAGG	0	4086	2120	2197	4525	1656	2005	1993	7051	1545	3334	1980	5455	2396	2502	3958	6762	n/a	NegCtrl	NegCtrl|48	1|Neg_Control_Human_GA_0475|NegCtrl	NegCtrl	ACCGGGTCCGCGCACAAGAGCAGGGTTTAAGAGCTATGCTGGAAACAGCATAGCAAGTTTAAATAAGGCTAGTCCGTTATCAACTTGAAAAAGTGGCACCGAGTCGGTGCTTTTTT
1|Neg_Control_Human_GA_0476|NegCtrl	CAACCGGCGGGCCCCTACAA	0	5	2080	1818	2344	1721	1024	1437	0	1	1883	942	5737	7	1847	2085	3886	n/a	NegCtrl	NegCtrl|48	1|Neg_Control_Human_GA_0476|NegCtrl	NegCtrl	ACCGCAACCGGCGGGCCCCTACAAGTTTAAGAGCTATGCTGGAAACAGCATAGCAAGTTTAAATAAGGCTAGTCCGTTATCAACTTGAAAAAGTGGCACCGAGTCGGTGCTTTTTT
1|Neg_Control_Human_GA_0477|NegCtrl	TCCTCGATAGCTGGAATCCA	0	1	1225	1020	0	469	213	608	0	0	1226	794	5199	12	1247	1038	2036	n/a	NegCtrl	NegCtrl|48	1|Neg_Control_Human_GA_0477|NegCtrl	NegCtrl	ACCGTCCTCGATAGCTGGAATCCAGTTTAAGAGCTATGCTGGAAACAGCATAGCAAGTTTAAATAAGGCTAGTCCGTTATCAACTTGAAAAAGTGGCACCGAGTCGGTGCTTTTTT
1|Neg_Control_Human_GA_0478|NegCtrl	TACGGATCACCAAATCTTAG	0	499	1234	853	1396	813	944	641	0	0	1397	502	1384	1	579	978	2500	n/a	NegCtrl	NegCtrl|48	1|Neg_Control_Human_GA_0478|NegCtrl	NegCtrl	ACCGTACGGATCACCAAATCTTAGGTTTAAGAGCTATGCTGGAAACAGCATAGCAAGTTTAAATAAGGCTAGTCCGTTATCAACTTGAAAAAGTGGCACCGAGTCGGTGCTTTTTT
1|Neg_Control_Human_GA_0479|NegCtrl	CTCGCACCATTGAGGGTAGT	4065	859	1186	1190	1	1039	899	892	0	0	1055	766	0	0	1356	1457	2940	n/a	NegCtrl	NegCtrl|48	1|Neg_Control_Human_GA_0479|NegCtrl	NegCtrl	ACCGCTCGCACCATTGAGGGTAGTGTTTAAGAGCTATGCTGGAAACAGCATAGCAAGTTTAAATAAGGCTAGTCCGTTATCAACTTGAAAAAGTGGCACCGAGTCGGTGCTTTTTT
1|Neg_Control_Human_GA_0480|NegCtrl	TCGGGGACCACCCACGATCC	0	2478	1150	986	832	313	730	990	0	1818	2197	1317	6	3860	2255	3247	4761	n/a	NegCtrl	NegCtrl|48	1|Neg_Control_Human_GA_0480|NegCtrl	NegCtrl	ACCGTCGGGGACCACCCACGATCCGTTTAAGAGCTATGCTGGAAACAGCATAGCAAGTTTAAATAAGGCTAGTCCGTTATCAACTTGAAAAAGTGGCACCGAGTCGGTGCTTTTTT
1|Neg_Control_Human_GA_0481|NegCtrl	CCTGCGGTGCACGGCTAGCC	0	1563	1188	1004	1	707	359	684	0	0	1163	813	0	869	708	322	2131	n/a	NegCtrl	NegCtrl|49	1|Neg_Control_Human_GA_0481|NegCtrl	NegCtrl	ACCGCCTGCGGTGCACGGCTAGCCGTTTAAGAGCTATGCTGGAAACAGCATAGCAAGTTTAAATAAGGCTAGTCCGTTATCAACTTGAAAAAGTGGCACCGAGTCGGTGCTTTTTT
1|Neg_Control_Human_GA_0482|NegCtrl	ACCGCTCATATAGGTAAAAA	0	0	549	560	1	717	622	614	0	0	1227	594	4248	1	980	1472	2426	n/a	NegCtrl	NegCtrl|49	1|Neg_Control_Human_GA_0482|NegCtrl	NegCtrl	ACCGACCGCTCATATAGGTAAAAAGTTTAAGAGCTATGCTGGAAACAGCATAGCAAGTTTAAATAAGGCTAGTCCGTTATCAACTTGAAAAAGTGGCACCGAGTCGGTGCTTTTTT
1|Neg_Control_Human_GA_0483|NegCtrl	AGTATTGTGGTGTCGTCAAC	2	3685	1861	1130	649	529	1190	1440	0	1799	1437	905	2416	816	1113	1186	4781	n/a	NegCtrl	NegCtrl|49	1|Neg_Control_Human_GA_0483|NegCtrl	NegCtrl	ACCGAGTATTGTGGTGTCGTCAACGTTTAAGAGCTATGCTGGAAACAGCATAGCAAGTTTAAATAAGGCTAGTCCGTTATCAACTTGAAAAAGTGGCACCGAGTCGGTGCTTTTTT
1|Neg_Control_Human_GA_0484|NegCtrl	TGACGCTCCACGTCCGGACC	2	1519	1041	574	1	806	894	488	0	0	747	547	1	1534	1104	1353	2300	n/a	NegCtrl	NegCtrl|49	1|Neg_Control_Human_GA_0484|NegCtrl	NegCtrl	ACCGTGACGCTCCACGTCCGGACCGTTTAAGAGCTATGCTGGAAACAGCATAGCAAGTTTAAATAAGGCTAGTCCGTTATCAACTTGAAAAAGTGGCACCGAGTCGGTGCTTTTTT
1|Neg_Control_Human_GA_0485|NegCtrl	GCTCGCAAGTATTTAAGGAC	2512	1665	742	416	1	31	210	451	0	0	333	138	1	0	808	562	1774	n/a	NegCtrl	NegCtrl|49	1|Neg_Control_Human_GA_0485|NegCtrl	NegCtrl	ACCGGCTCGCAAGTATTTAAGGACGTTTAAGAGCTATGCTGGAAACAGCATAGCAAGTTTAAATAAGGCTAGTCCGTTATCAACTTGAAAAAGTGGCACCGAGTCGGTGCTTTTTT
1|Neg_Control_Human_GA_0486|NegCtrl	GCCAGGGTTCTTGGTCCCGA	2	1198	2160	1409	1474	182	1028	1349	0	1710	2359	1077	3	0	2095	1783	3947	n/a	NegCtrl	NegCtrl|49	1|Neg_Control_Human_GA_0486|NegCtrl	NegCtrl	ACCGGCCAGGGTTCTTGGTCCCGAGTTTAAGAGCTATGCTGGAAACAGCATAGCAAGTTTAAATAAGGCTAGTCCGTTATCAACTTGAAAAAGTGGCACCGAGTCGGTGCTTTTTT
1|Neg_Control_Human_GA_0487|NegCtrl	GTCGCTGCGCCAGTGAGAAC	1	2042	1812	1397	0	275	1129	1345	0	1	1887	562	1	4058	1114	1041	3660	n/a	NegCtrl	NegCtrl|49	1|Neg_Control_Human_GA_0487|NegCtrl	NegCtrl	ACCGGTCGCTGCGCCAGTGAGAACGTTTAAGAGCTATGCTGGAAACAGCATAGCAAGTTTAAATAAGGCTAGTCCGTTATCAACTTGAAAAAGTGGCACCGAGTCGGTGCTTTTTT
1|Neg_Control_Human_GA_0488|NegCtrl	CCCGCTAACAGCCTAGATCA	0	0	1469	1360	3	1500	1367	1098	0	0	1351	1091	1511	2	2215	2982	4101	n/a	NegCtrl	NegCtrl|49	1|Neg_Control_Human_GA_0488|NegCtrl	NegCtrl	ACCGCCCGCTAACAGCCTAGATCAGTTTAAGAGCTATGCTGGAAACAGCATAGCAAGTTTAAATAAGGCTAGTCCGTTATCAACTTGAAAAAGTGGCACCGAGTCGGTGCTTTTTT
1|Neg_Control_Human_GA_0489|NegCtrl	TTGTACGGTACTGGCTTTGT	3385	1	1115	951	1472	582	543	845	10058	2088	1476	1019	1	1351	1580	1449	3263	n/a	NegCtrl	NegCtrl|49	1|Neg_Control_Human_GA_0489|NegCtrl	NegCtrl	ACCGTTGTACGGTACTGGCTTTGTGTTTAAGAGCTATGCTGGAAACAGCATAGCAAGTTTAAATAAGGCTAGTCCGTTATCAACTTGAAAAAGTGGCACCGAGTCGGTGCTTTTTT
1|Neg_Control_Human_GA_0490|NegCtrl	CAGGCTGCGCTTCGCAAGCT	7072	1584	2030	1424	1761	637	1672	1119	9815	2373	1711	1357	3	4968	1573	1654	5199	n/a	NegCtrl	NegCtrl|49	1|Neg_Control_Human_GA_0490|NegCtrl	NegCtrl	ACCGCAGGCTGCGCTTCGCAAGCTGTTTAAGAGCTATGCTGGAAACAGCATAGCAAGTTTAAATAAGGCTAGTCCGTTATCAACTTGAAAAAGTGGCACCGAGTCGGTGCTTTTTT
1|Neg_Control_Human_GA_0491|NegCtrl	GCCTAGTCTCGGTAAGAGTG	1	1575	1042	1149	1186	283	454	679	0	1	1465	432	3	1905	1202	1933	2076	n/a	NegCtrl	NegCtrl|50	1|Neg_Control_Human_GA_0491|NegCtrl	NegCtrl	ACCGGCCTAGTCTCGGTAAGAGTGGTTTAAGAGCTATGCTGGAAACAGCATAGCAAGTTTAAATAAGGCTAGTCCGTTATCAACTTGAAAAAGTGGCACCGAGTCGGTGCTTTTTT
1|Neg_Control_Human_GA_0492|NegCtrl	GGACGCACCATTCCGGGTGA	1	1517	1419	1162	2	1123	743	1011	0	3414	1671	623	1	0	1002	2180	2772	n/a	NegCtrl	NegCtrl|50	1|Neg_Control_Human_GA_0492|NegCtrl	NegCtrl	ACCGGGACGCACCATTCCGGGTGAGTTTAAGAGCTATGCTGGAAACAGCATAGCAAGTTTAAATAAGGCTAGTCCGTTATCAACTTGAAAAAGTGGCACCGAGTCGGTGCTTTTTT
1|Neg_Control_Human_GA_0493|NegCtrl	GATTGTGGTCGCTCAAAACC	1	1180	1913	2045	1900	1046	988	1470	0	7491	1804	1588	8624	1186	2000	2574	4758	n/a	NegCtrl	NegCtrl|50	1|Neg_Control_Human_GA_0493|NegCtrl	NegCtrl	ACCGGATTGTGGTCGCTCAAAACCGTTTAAGAGCTATGCTGGAAACAGCATAGCAAGTTTAAATAAGGCTAGTCCGTTATCAACTTGAAAAAGTGGCACCGAGTCGGTGCTTTTTT
1|Neg_Control_Human_GA_0494|NegCtrl	CTATAACCGAATCAAAGGGT	0	0	896	696	1282	560	262	621	0	2256	827	1092	2869	3	1377	1037	2035	n/a	NegCtrl	NegCtrl|50	1|Neg_Control_Human_GA_0494|NegCtrl	NegCtrl	ACCGCTATAACCGAATCAAAGGGTGTTTAAGAGCTATGCTGGAAACAGCATAGCAAGTTTAAATAAGGCTAGTCCGTTATCAACTTGAAAAAGTGGCACCGAGTCGGTGCTTTTTT
1|Neg_Control_Human_GA_0495|NegCtrl	AAATTGGCTTTCGTTCGTGC	80	892	1869	1243	0	1360	860	1028	0	0	1592	1053	3330	2998	2044	2188	4114	n/a	NegCtrl	NegCtrl|50	1|Neg_Control_Human_GA_0495|NegCtrl	NegCtrl	ACCGAAATTGGCTTTCGTTCGTGCGTTTAAGAGCTATGCTGGAAACAGCATAGCAAGTTTAAATAAGGCTAGTCCGTTATCAACTTGAAAAAGTGGCACCGAGTCGGTGCTTTTTT
1|Neg_Control_Human_GA_0496|NegCtrl	TCACCTCCGAACGAACACCT	4059	1144	1973	1310	2	995	1577	1130	0	1	1439	1243	1445	1625	1542	2674	3728	n/a	NegCtrl	NegCtrl|50	1|Neg_Control_Human_GA_0496|NegCtrl	NegCtrl	ACCGTCACCTCCGAACGAACACCTGTTTAAGAGCTATGCTGGAAACAGCATAGCAAGTTTAAATAAGGCTAGTCCGTTATCAACTTGAAAAAGTGGCACCGAGTCGGTGCTTTTTT
1|Neg_Control_Human_GA_0497|NegCtrl	GGAGATGCGGCCTTCTCAAA	0	1	869	948	0	289	367	417	0	0	1330	695	0	0	970	1122	2165	n/a	NegCtrl	NegCtrl|50	1|Neg_Control_Human_GA_0497|NegCtrl	NegCtrl	ACCGGGAGATGCGGCCTTCTCAAAGTTTAAGAGCTATGCTGGAAACAGCATAGCAAGTTTAAATAAGGCTAGTCCGTTATCAACTTGAAAAAGTGGCACCGAGTCGGTGCTTTTTT
1|Neg_Control_Human_GA_0498|NegCtrl	CTTAGGATTCCGAGGTATCT	3288	638	1385	780	0	1256	868	1055	0	8080	1033	1147	2198	3611	986	2739	2614	n/a	NegCtrl	NegCtrl|50	1|Neg_Control_Human_GA_0498|NegCtrl	NegCtrl	ACCGCTTAGGATTCCGAGGTATCTGTTTAAGAGCTATGCTGGAAACAGCATAGCAAGTTTAAATAAGGCTAGTCCGTTATCAACTTGAAAAAGTGGCACCGAGTCGGTGCTTTTTT
1|Neg_Control_Human_GA_0499|NegCtrl	GAACTGGCAAACAGGCGTGG	2	6875	3864	2997	2723	694	3122	3638	0	0	5742	2893	4657	5017	4005	4536	7855	n/a	NegCtrl	NegCtrl|50	1|Neg_Control_Human_GA_0499|NegCtrl	NegCtrl	ACCGGAACTGGCAAACAGGCGTGGGTTTAAGAGCTATGCTGGAAACAGCATAGCAAGTTTAAATAAGGCTAGTCCGTTATCAACTTGAAAAAGTGGCACCGAGTCGGTGCTTTTTT
1|Neg_Control_Human_GA_0500|NegCtrl	CCTGTCGCTATCGTTAGAGA	3601	1072	2152	1965	3987	612	1768	1775	0	4980	2821	1569	2518	5249	2545	2865	5401	n/a	NegCtrl	NegCtrl|50	1|Neg_Control_Human_GA_0500|NegCtrl	NegCtrl	ACCGCCTGTCGCTATCGTTAGAGAGTTTAAGAGCTATGCTGGAAACAGCATAGCAAGTTTAAATAAGGCTAGTCCGTTATCAACTTGAAAAAGTGGCACCGAGTCGGTGCTTTTTT
2|sgINTRON-ALAS1_1|NegCtrlIntron	GGTGGACATCCACCCCTAAG	0	2	245	384	0	244	99	266	0	0	514	201	0	0	349	254	1081	211	NegCtrlIntron	IntronCtrl|ALAS1	2|sgINTRON-ALAS1_1|IntronCtrl_ALAS1	IntronCtrl_ALAS1	ACCGGGTGGACATCCACCCCTAAGGTTTAAGAGCTATGCTGGAAACAGCATAGCAAGTTTAAATAAGGCTAGTCCGTTATCAACTTGAAAAAGTGGCACCGAGTCGGTGCTTTTTT
2|sgINTRON-ALAS1_2|NegCtrlIntron	AGCTCAGTGGTGCCGCTTAG	0	1782	1576	1300	4129	1656	880	1804	0	5788	1531	1042	1572	3097	1142	2781	4827	211	NegCtrlIntron	IntronCtrl|ALAS1	2|sgINTRON-ALAS1_2|IntronCtrl_ALAS1	IntronCtrl_ALAS1	ACCGAGCTCAGTGGTGCCGCTTAGGTTTAAGAGCTATGCTGGAAACAGCATAGCAAGTTTAAATAAGGCTAGTCCGTTATCAACTTGAAAAAGTGGCACCGAGTCGGTGCTTTTTT
2|sgINTRON-ALAS1_3|NegCtrlIntron	TGCAACACAGTGGTGCCTGG	0	2196	1105	1297	1948	978	767	998	1	4267	1591	723	1	1283	1665	3822	2603	211	NegCtrlIntron	IntronCtrl|ALAS1	2|sgINTRON-ALAS1_3|IntronCtrl_ALAS1	IntronCtrl_ALAS1	ACCGTGCAACACAGTGGTGCCTGGGTTTAAGAGCTATGCTGGAAACAGCATAGCAAGTTTAAATAAGGCTAGTCCGTTATCAACTTGAAAAAGTGGCACCGAGTCGGTGCTTTTTT
2|sgINTRON-ALAS1_4|NegCtrlIntron	GTCAGCCACTGACCAAGACG	1	2311	1633	1399	1400	1044	1909	735	0	0	2104	662	11666	10	2038	944	3805	211	NegCtrlIntron	IntronCtrl|ALAS1	2|sgINTRON-ALAS1_4|IntronCtrl_ALAS1	IntronCtrl_ALAS1	ACCGGTCAGCCACTGACCAAGACGGTTTAAGAGCTATGCTGGAAACAGCATAGCAAGTTTAAATAAGGCTAGTCCGTTATCAACTTGAAAAAGTGGCACCGAGTCGGTGCTTTTTT
2|sgINTRON-ALAS1_5|NegCtrlIntron	TGAAATGATTCTGGAAAACG	2214	2273	1493	1560	1767	496	367	1133	7677	0	1829	740	1142	530	1527	2421	4097	211	NegCtrlIntron	IntronCtrl|ALAS1	2|sgINTRON-ALAS1_5|IntronCtrl_ALAS1	IntronCtrl_ALAS1	ACCGTGAAATGATTCTGGAAAACGGTTTAAGAGCTATGCTGGAAACAGCATAGCAAGTTTAAATAAGGCTAGTCCGTTATCAACTTGAAAAAGTGGCACCGAGTCGGTGCTTTTTT
2|sgINTRON-ALAS1_6|NegCtrlIntron	TGACTAAGTAGGACGCCTGG	2399	1971	1384	835	0	89	944	680	0	0	919	638	2885	1162	841	1637	2708	211	NegCtrlIntron	IntronCtrl|ALAS1	2|sgINTRON-ALAS1_6|IntronCtrl_ALAS1	IntronCtrl_ALAS1	ACCGTGACTAAGTAGGACGCCTGGGTTTAAGAGCTATGCTGGAAACAGCATAGCAAGTTTAAATAAGGCTAGTCCGTTATCAACTTGAAAAAGTGGCACCGAGTCGGTGCTTTTTT
2|sgINTRON-ALAS1_7|NegCtrlIntron	GGCGCAGACTTGCGCGATGG	1	2155	1248	1030	2540	0	1249	671	1	4572	866	626	2	790	1142	1808	3141	211	NegCtrlIntron	IntronCtrl|ALAS1	2|sgINTRON-ALAS1_7|IntronCtrl_ALAS1	IntronCtrl_ALAS1	ACCGGGCGCAGACTTGCGCGATGGGTTTAAGAGCTATGCTGGAAACAGCATAGCAAGTTTAAATAAGGCTAGTCCGTTATCAACTTGAAAAAGTGGCACCGAGTCGGTGCTTTTTT
2|sgINTRON-ALAS1_8|NegCtrlIntron	GCGCCTCGGACCTGGACTTG	1	1520	2205	1740	1	1348	979	1550	0	0	2838	1623	1277	3429	2545	2870	5501	211	NegCtrlIntron	IntronCtrl|ALAS1	2|sgINTRON-ALAS1_8|IntronCtrl_ALAS1	IntronCtrl_ALAS1	ACCGGCGCCTCGGACCTGGACTTGGTTTAAGAGCTATGCTGGAAACAGCATAGCAAGTTTAAATAAGGCTAGTCCGTTATCAACTTGAAAAAGTGGCACCGAGTCGGTGCTTTTTT
2|sgINTRON-C1orf43_1|NegCtrlIntron	GACCTTGTGATCTTCTCATG	2191	1	891	802	1	1084	555	724	8218	3262	1223	370	1	3215	533	873	2320	25912	NegCtrlIntron	IntronCtrl|C1orf43	2|sgINTRON-C1orf43_1|IntronCtrl_C1orf43	IntronCtrl_C1orf43	ACCGGACCTTGTGATCTTCTCATGGTTTAAGAGCTATGCTGGAAACAGCATAGCAAGTTTAAATAAGGCTAGTCCGTTATCAACTTGAAAAAGTGGCACCGAGTCGGTGCTTTTTT
2|sgINTRON-C1orf43_2|NegCtrlIntron	GATTGACGTGGTGGTGAAGG	0	3241	1033	1185	3	776	757	655	0	0	1293	492	0	0	1141	977	2671	25912	NegCtrlIntron	IntronCtrl|C1orf43	2|sgINTRON-C1orf43_2|IntronCtrl_C1orf43	IntronCtrl_C1orf43	ACCGGATTGACGTGGTGGTGAAGGGTTTAAGAGCTATGCTGGAAACAGCATAGCAAGTTTAAATAAGGCTAGTCCGTTATCAACTTGAAAAAGTGGCACCGAGTCGGTGCTTTTTT
2|sgINTRON-C1orf43_3|NegCtrlIntron	TGATTGACGTGGTGGTGAAG	0	906	807	971	1757	0	302	629	8826	0	1108	295	1	1319	1235	743	2677	25912	NegCtrlIntron	IntronCtrl|C1orf43	2|sgINTRON-C1orf43_3|IntronCtrl_C1orf43	IntronCtrl_C1orf43	ACCGTGATTGACGTGGTGGTGAAGGTTTAAGAGCTATGCTGGAAACAGCATAGCAAGTTTAAATAAGGCTAGTCCGTTATCAACTTGAAAAAGTGGCACCGAGTCGGTGCTTTTTT
2|sgINTRON-C1orf43_4|NegCtrlIntron	AGTTGGGCAGATAACACTTG	1948	2266	1655	1306	3	778	1165	1226	0	3867	1888	832	1637	1	1564	2394	4224	25912	NegCtrlIntron	IntronCtrl|C1orf43	2|sgINTRON-C1orf43_4|IntronCtrl_C1orf43	IntronCtrl_C1orf43	ACCGAGTTGGGCAGATAACACTTGGTTTAAGAGCTATGCTGGAAACAGCATAGCAAGTTTAAATAAGGCTAGTCCGTTATCAACTTGAAAAAGTGGCACCGAGTCGGTGCTTTTTT
2|sgINTRON-C1orf43_5|NegCtrlIntron	GTACATGAAAAGGCTCTAGG	0	1096	1472	1111	3384	390	1087	757	0	1748	490	313	5750	5	839	1000	2454	25912	NegCtrlIntron	IntronCtrl|C1orf43	2|sgINTRON-C1orf43_5|IntronCtrl_C1orf43	IntronCtrl_C1orf43	ACCGGTACATGAAAAGGCTCTAGGGTTTAAGAGCTATGCTGGAAACAGCATAGCAAGTTTAAATAAGGCTAGTCCGTTATCAACTTGAAAAAGTGGCACCGAGTCGGTGCTTTTTT
2|sgINTRON-C1orf43_6|NegCtrlIntron	TGTCAGCAAAGAACAAAGAG	0	0	1513	1164	1	1295	625	946	0	4273	2601	1388	1	1288	1656	2656	3667	25912	NegCtrlIntron	IntronCtrl|C1orf43	2|sgINTRON-C1orf43_6|IntronCtrl_C1orf43	IntronCtrl_C1orf43	ACCGTGTCAGCAAAGAACAAAGAGGTTTAAGAGCTATGCTGGAAACAGCATAGCAAGTTTAAATAAGGCTAGTCCGTTATCAACTTGAAAAAGTGGCACCGAGTCGGTGCTTTTTT
2|sgINTRON-C1orf43_7|NegCtrlIntron	GTACAGTGCTCTAGGAGTTG	1	2345	2681	1714	3346	1350	2495	1416	18	0	2234	1239	3062	4498	2305	4093	5551	25912	NegCtrlIntron	IntronCtrl|C1orf43	2|sgINTRON-C1orf43_7|IntronCtrl_C1orf43	IntronCtrl_C1orf43	ACCGGTACAGTGCTCTAGGAGTTGGTTTAAGAGCTATGCTGGAAACAGCATAGCAAGTTTAAATAAGGCTAGTCCGTTATCAACTTGAAAAAGTGGCACCGAGTCGGTGCTTTTTT
2|sgINTRON-C1orf43_8|NegCtrlIntron	AGGGTGGAAAATTCAGCCAG	0	1271	1585	1268	3	1085	1298	1155	0	0	2195	1378	8291	1648	2015	1738	3380	25912	NegCtrlIntron	IntronCtrl|C1orf43	2|sgINTRON-C1orf43_8|IntronCtrl_C1orf43	IntronCtrl_C1orf43	ACCGAGGGTGGAAAATTCAGCCAGGTTTAAGAGCTATGCTGGAAACAGCATAGCAAGTTTAAATAAGGCTAGTCCGTTATCAACTTGAAAAAGTGGCACCGAGTCGGTGCTTTTTT
2|sgINTRON-DMD_1|NegCtrlIntron	TGCCAGTGCCTTCTGAGTAG	3408	0	1296	1066	1034	1365	1038	1258	0	0	1125	653	1	0	1457	1395	2742	1756	NegCtrlIntron	IntronCtrl|DMD	2|sgINTRON-DMD_1|IntronCtrl_DMD	IntronCtrl_DMD	ACCGTGCCAGTGCCTTCTGAGTAGGTTTAAGAGCTATGCTGGAAACAGCATAGCAAGTTTAAATAAGGCTAGTCCGTTATCAACTTGAAAAAGTGGCACCGAGTCGGTGCTTTTTT
2|sgINTRON-DMD_2|NegCtrlIntron	GTCAATTATCCAAGACCATG	1	47	958	368	0	173	506	583	0	0	1176	643	2960	1050	782	1012	2222	1756	NegCtrlIntron	IntronCtrl|DMD	2|sgINTRON-DMD_2|IntronCtrl_DMD	IntronCtrl_DMD	ACCGGTCAATTATCCAAGACCATGGTTTAAGAGCTATGCTGGAAACAGCATAGCAAGTTTAAATAAGGCTAGTCCGTTATCAACTTGAAAAAGTGGCACCGAGTCGGTGCTTTTTT
2|sgINTRON-DMD_3|NegCtrlIntron	GCTCTGAGGGTTTCTCTTAG	906	0	1084	925	4202	368	1233	1081	0	41	951	890	3725	1185	953	1538	2431	1756	NegCtrlIntron	IntronCtrl|DMD	2|sgINTRON-DMD_3|IntronCtrl_DMD	IntronCtrl_DMD	ACCGGCTCTGAGGGTTTCTCTTAGGTTTAAGAGCTATGCTGGAAACAGCATAGCAAGTTTAAATAAGGCTAGTCCGTTATCAACTTGAAAAAGTGGCACCGAGTCGGTGCTTTTTT
2|sgINTRON-DMD_4|NegCtrlIntron	GGTACACAATCTTGCATTGG	0	0	1247	997	2	1271	946	787	0	0	1321	1092	1660	1622	1880	850	2436	1756	NegCtrlIntron	IntronCtrl|DMD	2|sgINTRON-DMD_4|IntronCtrl_DMD	IntronCtrl_DMD	ACCGGGTACACAATCTTGCATTGGGTTTAAGAGCTATGCTGGAAACAGCATAGCAAGTTTAAATAAGGCTAGTCCGTTATCAACTTGAAAAAGTGGCACCGAGTCGGTGCTTTTTT
2|sgINTRON-DMD_5|NegCtrlIntron	GGGTAAAAGTAGCAAGTCAG	0	1361	1053	1184	2	342	708	459	0	0	945	1059	2	3249	1062	2014	2387	1756	NegCtrlIntron	IntronCtrl|DMD	2|sgINTRON-DMD_5|IntronCtrl_DMD	IntronCtrl_DMD	ACCGGGGTAAAAGTAGCAAGTCAGGTTTAAGAGCTATGCTGGAAACAGCATAGCAAGTTTAAATAAGGCTAGTCCGTTATCAACTTGAAAAAGTGGCACCGAGTCGGTGCTTTTTT
2|sgINTRON-DMD_6|NegCtrlIntron	GTGCTTACTATGTTTCACTG	0	1479	1171	905	1	300	331	768	0	2964	1332	1020	2620	1120	1224	1821	3436	1756	NegCtrlIntron	IntronCtrl|DMD	2|sgINTRON-DMD_6|IntronCtrl_DMD	IntronCtrl_DMD	ACCGGTGCTTACTATGTTTCACTGGTTTAAGAGCTATGCTGGAAACAGCATAGCAAGTTTAAATAAGGCTAGTCCGTTATCAACTTGAAAAAGTGGCACCGAGTCGGTGCTTTTTT
2|sgINTRON-DMD_7|NegCtrlIntron	GTTTCACTGGGGTAGGAATG	0	3182	1367	1167	1271	0	795	1095	0	4291	1772	721	3082	1531	1398	2052	3294	1756	NegCtrlIntron	IntronCtrl|DMD	2|sgINTRON-DMD_7|IntronCtrl_DMD	IntronCtrl_DMD	ACCGGTTTCACTGGGGTAGGAATGGTTTAAGAGCTATGCTGGAAACAGCATAGCAAGTTTAAATAAGGCTAGTCCGTTATCAACTTGAAAAAGTGGCACCGAGTCGGTGCTTTTTT
2|sgINTRON-DMD_8|NegCtrlIntron	AGTACGGAGCTATCACGTAG	0	570	1369	891	2	482	995	1480	0	0	1468	620	0	0	1658	742	3790	1756	NegCtrlIntron	IntronCtrl|DMD	2|sgINTRON-DMD_8|IntronCtrl_DMD	IntronCtrl_DMD	ACCGAGTACGGAGCTATCACGTAGGTTTAAGAGCTATGCTGGAAACAGCATAGCAAGTTTAAATAAGGCTAGTCCGTTATCAACTTGAAAAAGTGGCACCGAGTCGGTGCTTTTTT
2|sgINTRON-GPI_1|NegCtrlIntron	AGATCTTACCTCCTTAGACA	0	0	622	420	0	0	1	372	0	0	803	340	1790	1649	482	797	1651	2821	NegCtrlIntron	IntronCtrl|GPI	2|sgINTRON-GPI_1|IntronCtrl_GPI	IntronCtrl_GPI	ACCGAGATCTTACCTCCTTAGACAGTTTAAGAGCTATGCTGGAAACAGCATAGCAAGTTTAAATAAGGCTAGTCCGTTATCAACTTGAAAAAGTGGCACCGAGTCGGTGCTTTTTT
2|sgINTRON-GPI_2|NegCtrlIntron	TGGAAGCCCACTGAGGCAGG	1792	650	1928	1601	1917	720	2012	1470	0	874	2161	947	1	775	2060	2628	5393	2821	NegCtrlIntron	IntronCtrl|GPI	2|sgINTRON-GPI_2|IntronCtrl_GPI	IntronCtrl_GPI	ACCGTGGAAGCCCACTGAGGCAGGGTTTAAGAGCTATGCTGGAAACAGCATAGCAAGTTTAAATAAGGCTAGTCCGTTATCAACTTGAAAAAGTGGCACCGAGTCGGTGCTTTTTT
2|sgINTRON-GPI_3|NegCtrlIntron	CGTTGCCTGTGCTAGAAATG	0	2157	1085	961	0	1040	606	885	1	1305	1956	473	3	927	1666	2895	3495	2821	NegCtrlIntron	IntronCtrl|GPI	2|sgINTRON-GPI_3|IntronCtrl_GPI	IntronCtrl_GPI	ACCGCGTTGCCTGTGCTAGAAATGGTTTAAGAGCTATGCTGGAAACAGCATAGCAAGTTTAAATAAGGCTAGTCCGTTATCAACTTGAAAAAGTGGCACCGAGTCGGTGCTTTTTT
2|sgINTRON-GPI_4|NegCtrlIntron	GCCTGTGCTAGAAATGTGGG	2052	5226	1978	1648	1	561	564	797	0	1	2036	912	1	0	1618	2416	3661	2821	NegCtrlIntron	IntronCtrl|GPI	2|sgINTRON-GPI_4|IntronCtrl_GPI	IntronCtrl_GPI	ACCGGCCTGTGCTAGAAATGTGGGGTTTAAGAGCTATGCTGGAAACAGCATAGCAAGTTTAAATAAGGCTAGTCCGTTATCAACTTGAAAAAGTGGCACCGAGTCGGTGCTTTTTT
2|sgINTRON-GPI_5|NegCtrlIntron	GCCTGTCAGTGTCCAGGAGG	2780	280	736	960	1107	1150	410	524	0	3965	739	317	1	0	619	832	2157	2821	NegCtrlIntron	IntronCtrl|GPI	2|sgINTRON-GPI_5|IntronCtrl_GPI	IntronCtrl_GPI	ACCGGCCTGTCAGTGTCCAGGAGGGTTTAAGAGCTATGCTGGAAACAGCATAGCAAGTTTAAATAAGGCTAGTCCGTTATCAACTTGAAAAAGTGGCACCGAGTCGGTGCTTTTTT
2|sgINTRON-GPI_6|NegCtrlIntron	GGATCTGTCAGTACCACCTG	0	1701	1504	1119	2	336	1353	1149	0	2161	1241	689	1451	1236	1141	796	3785	2821	NegCtrlIntron	IntronCtrl|GPI	2|sgINTRON-GPI_6|IntronCtrl_GPI	IntronCtrl_GPI	ACCGGGATCTGTCAGTACCACCTGGTTTAAGAGCTATGCTGGAAACAGCATAGCAAGTTTAAATAAGGCTAGTCCGTTATCAACTTGAAAAAGTGGCACCGAGTCGGTGCTTTTTT
2|sgINTRON-GPI_7|NegCtrlIntron	TGGGCCACTGTTCAAGCAGG	0	288	623	496	937	180	313	658	1	2819	1317	292	0	0	979	610	1824	2821	NegCtrlIntron	IntronCtrl|GPI	2|sgINTRON-GPI_7|IntronCtrl_GPI	IntronCtrl_GPI	ACCGTGGGCCACTGTTCAAGCAGGGTTTAAGAGCTATGCTGGAAACAGCATAGCAAGTTTAAATAAGGCTAGTCCGTTATCAACTTGAAAAAGTGGCACCGAGTCGGTGCTTTTTT
2|sgINTRON-GPI_8|NegCtrlIntron	GGTCTTCCCAATGTTTGAGG	1574	435	908	1129	4	1251	170	1062	0	4592	962	693	1	867	1254	1502	2438	2821	NegCtrlIntron	IntronCtrl|GPI	2|sgINTRON-GPI_8|IntronCtrl_GPI	IntronCtrl_GPI	ACCGGGTCTTCCCAATGTTTGAGGGTTTAAGAGCTATGCTGGAAACAGCATAGCAAGTTTAAATAAGGCTAGTCCGTTATCAACTTGAAAAAGTGGCACCGAGTCGGTGCTTTTTT
2|sgINTRON-HBG1_1|NegCtrlIntron	GCCAGTGACTAGTGCTTGAA	3	1007	1137	778	0	404	1014	528	0	0	1196	474	5194	4373	857	1408	2223	3047	NegCtrlIntron	IntronCtrl|HBG1	2|sgINTRON-HBG1_1|IntronCtrl_HBG1	IntronCtrl_HBG1	ACCGGCCAGTGACTAGTGCTTGAAGTTTAAGAGCTATGCTGGAAACAGCATAGCAAGTTTAAATAAGGCTAGTCCGTTATCAACTTGAAAAAGTGGCACCGAGTCGGTGCTTTTTT
2|sgINTRON-HBG1_2|NegCtrlIntron	GGCCAGTGACTAGTGCTTGA	3578	2647	2236	2198	2665	1234	3258	1664	0	1826	1749	1788	2402	3435	2158	2751	4756	3047	NegCtrlIntron	IntronCtrl|HBG1	2|sgINTRON-HBG1_2|IntronCtrl_HBG1	IntronCtrl_HBG1	ACCGGGCCAGTGACTAGTGCTTGAGTTTAAGAGCTATGCTGGAAACAGCATAGCAAGTTTAAATAAGGCTAGTCCGTTATCAACTTGAAAAAGTGGCACCGAGTCGGTGCTTTTTT
2|sgINTRON-HBG1_3|NegCtrlIntron	GTCTTCAGCCTACAACATAC	1	288	1013	946	3	195	264	823	0	0	929	549	0	3607	1652	1442	2665	3047	NegCtrlIntron	IntronCtrl|HBG1	2|sgINTRON-HBG1_3|IntronCtrl_HBG1	IntronCtrl_HBG1	ACCGGTCTTCAGCCTACAACATACGTTTAAGAGCTATGCTGGAAACAGCATAGCAAGTTTAAATAAGGCTAGTCCGTTATCAACTTGAAAAAGTGGCACCGAGTCGGTGCTTTTTT
2|sgINTRON-HBG1_4|NegCtrlIntron	GATTTTTAGAGGCACTCCTT	0	140	1039	817	2	1557	763	1209	0	51	1937	1442	4243	3578	1615	1119	2717	3047	NegCtrlIntron	IntronCtrl|HBG1	2|sgINTRON-HBG1_4|IntronCtrl_HBG1	IntronCtrl_HBG1	ACCGGATTTTTAGAGGCACTCCTTGTTTAAGAGCTATGCTGGAAACAGCATAGCAAGTTTAAATAAGGCTAGTCCGTTATCAACTTGAAAAAGTGGCACCGAGTCGGTGCTTTTTT
2|sgINTRON-HBG1_5|NegCtrlIntron	TGGTAATGTTTTAGGGCCTA	5945	0	1253	1425	0	384	746	892	0	4868	1288	1083	1805	2417	2073	2300	3024	3047	NegCtrlIntron	IntronCtrl|HBG1	2|sgINTRON-HBG1_5|IntronCtrl_HBG1	IntronCtrl_HBG1	ACCGTGGTAATGTTTTAGGGCCTAGTTTAAGAGCTATGCTGGAAACAGCATAGCAAGTTTAAATAAGGCTAGTCCGTTATCAACTTGAAAAAGTGGCACCGAGTCGGTGCTTTTTT
2|sgINTRON-HBG1_6|NegCtrlIntron	AGGCCCTAAAACATTACCAC	3244	2466	1765	1448	0	309	529	1117	0	1777	1845	606	1	2055	1766	2682	3727	3047	NegCtrlIntron	IntronCtrl|HBG1	2|sgINTRON-HBG1_6|IntronCtrl_HBG1	IntronCtrl_HBG1	ACCGAGGCCCTAAAACATTACCACGTTTAAGAGCTATGCTGGAAACAGCATAGCAAGTTTAAATAAGGCTAGTCCGTTATCAACTTGAAAAAGTGGCACCGAGTCGGTGCTTTTTT
2|sgINTRON-HBG1_7|NegCtrlIntron	GGCCCTAAAACATTACCACT	0	1015	429	558	860	0	626	220	0	0	521	424	0	0	493	247	1481	3047	NegCtrlIntron	IntronCtrl|HBG1	2|sgINTRON-HBG1_7|IntronCtrl_HBG1	IntronCtrl_HBG1	ACCGGGCCCTAAAACATTACCACTGTTTAAGAGCTATGCTGGAAACAGCATAGCAAGTTTAAATAAGGCTAGTCCGTTATCAACTTGAAAAAGTGGCACCGAGTCGGTGCTTTTTT
2|sgINTRON-HBG1_8|NegCtrlIntron	GACCCAGTGGTAATGTTTTA	0	0	781	898	1	158	1029	981	0	0	1171	727	0	0	862	510	2330	3047	NegCtrlIntron	IntronCtrl|HBG1	2|sgINTRON-HBG1_8|IntronCtrl_HBG1	IntronCtrl_HBG1	ACCGGACCCAGTGGTAATGTTTTAGTTTAAGAGCTATGCTGGAAACAGCATAGCAAGTTTAAATAAGGCTAGTCCGTTATCAACTTGAAAAAGTGGCACCGAGTCGGTGCTTTTTT
2|sgINTRON-RAB7A_1|NegCtrlIntron	GGTTGTGGACAGAACTCTTG	3460	0	1131	603	2	0	245	643	27016	3467	1111	425	1467	634	994	1117	1959	7879	NegCtrlIntron	IntronCtrl|RAB7A	2|sgINTRON-RAB7A_1|IntronCtrl_RAB7A	IntronCtrl_RAB7A	ACCGGGTTGTGGACAGAACTCTTGGTTTAAGAGCTATGCTGGAAACAGCATAGCAAGTTTAAATAAGGCTAGTCCGTTATCAACTTGAAAAAGTGGCACCGAGTCGGTGCTTTTTT
2|sgINTRON-RAB7A_2|NegCtrlIntron	GGCAAATGGTTTAACCTAAG	0	630	744	728	0	236	484	662	33114	1	1376	688	1	0	1016	2408	2675	7879	NegCtrlIntron	IntronCtrl|RAB7A	2|sgINTRON-RAB7A_2|IntronCtrl_RAB7A	IntronCtrl_RAB7A	ACCGGGCAAATGGTTTAACCTAAGGTTTAAGAGCTATGCTGGAAACAGCATAGCAAGTTTAAATAAGGCTAGTCCGTTATCAACTTGAAAAAGTGGCACCGAGTCGGTGCTTTTTT
2|sgINTRON-RAB7A_3|NegCtrlIntron	TGGCAGGAATTCAGTGTTAG	3378	4005	1075	927	2	550	1078	646	0	3626	1077	955	1	2457	884	1262	2193	7879	NegCtrlIntron	IntronCtrl|RAB7A	2|sgINTRON-RAB7A_3|IntronCtrl_RAB7A	IntronCtrl_RAB7A	ACCGTGGCAGGAATTCAGTGTTAGGTTTAAGAGCTATGCTGGAAACAGCATAGCAAGTTTAAATAAGGCTAGTCCGTTATCAACTTGAAAAAGTGGCACCGAGTCGGTGCTTTTTT
2|sgINTRON-RAB7A_4|NegCtrlIntron	GACTACCTAAAAGTTGTCTG	0	1	999	718	1	356	328	453	0	0	750	367	1	1072	424	617	2065	7879	NegCtrlIntron	IntronCtrl|RAB7A	2|sgINTRON-RAB7A_4|IntronCtrl_RAB7A	IntronCtrl_RAB7A	ACCGGACTACCTAAAAGTTGTCTGGTTTAAGAGCTATGCTGGAAACAGCATAGCAAGTTTAAATAAGGCTAGTCCGTTATCAACTTGAAAAAGTGGCACCGAGTCGGTGCTTTTTT
2|sgINTRON-RAB7A_5|NegCtrlIntron	GTGCACTGGGTGATCTTGTG	0	1885	2370	1802	3	429	1529	1740	1	5489	2568	918	0	0	2342	2504	4451	7879	NegCtrlIntron	IntronCtrl|RAB7A	2|sgINTRON-RAB7A_5|IntronCtrl_RAB7A	IntronCtrl_RAB7A	ACCGGTGCACTGGGTGATCTTGTGGTTTAAGAGCTATGCTGGAAACAGCATAGCAAGTTTAAATAAGGCTAGTCCGTTATCAACTTGAAAAAGTGGCACCGAGTCGGTGCTTTTTT
2|sgINTRON-RAB7A_6|NegCtrlIntron	GGGTGATCTTGTGAGGCAGG	0	400	707	307	2	231	866	516	8014	0	706	583	1469	1	915	1253	1983	7879	NegCtrlIntron	IntronCtrl|RAB7A	2|sgINTRON-RAB7A_6|IntronCtrl_RAB7A	IntronCtrl_RAB7A	ACCGGGGTGATCTTGTGAGGCAGGGTTTAAGAGCTATGCTGGAAACAGCATAGCAAGTTTAAATAAGGCTAGTCCGTTATCAACTTGAAAAAGTGGCACCGAGTCGGTGCTTTTTT
2|sgINTRON-RAB7A_7|NegCtrlIntron	TGACTCATAAGTCATCATCG	986	1135	729	618	0	440	451	552	17686	3004	917	577	1	1883	835	869	1991	7879	NegCtrlIntron	IntronCtrl|RAB7A	2|sgINTRON-RAB7A_7|IntronCtrl_RAB7A	IntronCtrl_RAB7A	ACCGTGACTCATAAGTCATCATCGGTTTAAGAGCTATGCTGGAAACAGCATAGCAAGTTTAAATAAGGCTAGTCCGTTATCAACTTGAAAAAGTGGCACCGAGTCGGTGCTTTTTT
2|sgINTRON-RAB7A_8|NegCtrlIntron	GGTGGCTGCCCTCCCCAGCG	1723	411	1177	921	1	479	772	885	0	0	2096	553	1	0	1533	1699	3420	7879	NegCtrlIntron	IntronCtrl|RAB7A	2|sgINTRON-RAB7A_8|IntronCtrl_RAB7A	IntronCtrl_RAB7A	ACCGGGTGGCTGCCCTCCCCAGCGGTTTAAGAGCTATGCTGGAAACAGCATAGCAAGTTTAAATAAGGCTAGTCCGTTATCAACTTGAAAAAGTGGCACCGAGTCGGTGCTTTTTT
2|sgINTRON-REEP5_1|NegCtrlIntron	GCTTGAGAAAGTCAAGGCTG	3171	595	436	534	0	716	151	185	0	0	651	443	1	0	716	1267	2193	7905	NegCtrlIntron	IntronCtrl|REEP5	2|sgINTRON-REEP5_1|IntronCtrl_REEP5	IntronCtrl_REEP5	ACCGGCTTGAGAAAGTCAAGGCTGGTTTAAGAGCTATGCTGGAAACAGCATAGCAAGTTTAAATAAGGCTAGTCCGTTATCAACTTGAAAAAGTGGCACCGAGTCGGTGCTTTTTT
2|sgINTRON-REEP5_2|NegCtrlIntron	GTAACCTCACAACTTAGAAG	0	0	563	319	1	603	18	495	0	1589	221	197	0	1940	603	223	1959	7905	NegCtrlIntron	IntronCtrl|REEP5	2|sgINTRON-REEP5_2|IntronCtrl_REEP5	IntronCtrl_REEP5	ACCGGTAACCTCACAACTTAGAAGGTTTAAGAGCTATGCTGGAAACAGCATAGCAAGTTTAAATAAGGCTAGTCCGTTATCAACTTGAAAAAGTGGCACCGAGTCGGTGCTTTTTT
2|sgINTRON-REEP5_3|NegCtrlIntron	TGCCTTTTCCTAGGTAAAGG	2984	1448	882	646	1099	0	384	243	0	0	1441	402	0	0	621	814	1943	7905	NegCtrlIntron	IntronCtrl|REEP5	2|sgINTRON-REEP5_3|IntronCtrl_REEP5	IntronCtrl_REEP5	ACCGTGCCTTTTCCTAGGTAAAGGGTTTAAGAGCTATGCTGGAAACAGCATAGCAAGTTTAAATAAGGCTAGTCCGTTATCAACTTGAAAAAGTGGCACCGAGTCGGTGCTTTTTT
2|sgINTRON-REEP5_4|NegCtrlIntron	AGCAGCTGAAATATAAGTGG	3727	811	786	757	0	359	795	458	0	0	786	480	847	1	620	530	2256	7905	NegCtrlIntron	IntronCtrl|REEP5	2|sgINTRON-REEP5_4|IntronCtrl_REEP5	IntronCtrl_REEP5	ACCGAGCAGCTGAAATATAAGTGGGTTTAAGAGCTATGCTGGAAACAGCATAGCAAGTTTAAATAAGGCTAGTCCGTTATCAACTTGAAAAAGTGGCACCGAGTCGGTGCTTTTTT
2|sgINTRON-REEP5_5|NegCtrlIntron	GGGCTCTAAAGCAGTTGTGG	0	422	588	422	0	194	90	256	0	3507	394	477	1	3534	685	1055	1671	7905	NegCtrlIntron	IntronCtrl|REEP5	2|sgINTRON-REEP5_5|IntronCtrl_REEP5	IntronCtrl_REEP5	ACCGGGGCTCTAAAGCAGTTGTGGGTTTAAGAGCTATGCTGGAAACAGCATAGCAAGTTTAAATAAGGCTAGTCCGTTATCAACTTGAAAAAGTGGCACCGAGTCGGTGCTTTTTT
2|sgINTRON-REEP5_6|NegCtrlIntron	GTATGAAGCACAAGCCAATG	2	881	850	839	203	612	301	533	18012	1496	771	506	4118	1908	945	961	2131	7905	NegCtrlIntron	IntronCtrl|REEP5	2|sgINTRON-REEP5_6|IntronCtrl_REEP5	IntronCtrl_REEP5	ACCGGTATGAAGCACAAGCCAATGGTTTAAGAGCTATGCTGGAAACAGCATAGCAAGTTTAAATAAGGCTAGTCCGTTATCAACTTGAAAAAGTGGCACCGAGTCGGTGCTTTTTT
2|sgINTRON-REEP5_7|NegCtrlIntron	TGCCTGCGCTTTGCCTTCTG	3518	2174	2671	2140	0	2	1503	1804	13591	1949	3528	1379	1772	5727	3651	3441	9015	7905	NegCtrlIntron	IntronCtrl|REEP5	2|sgINTRON-REEP5_7|IntronCtrl_REEP5	IntronCtrl_REEP5	ACCGTGCCTGCGCTTTGCCTTCTGGTTTAAGAGCTATGCTGGAAACAGCATAGCAAGTTTAAATAAGGCTAGTCCGTTATCAACTTGAAAAAGTGGCACCGAGTCGGTGCTTTTTT
2|sgINTRON-REEP5_8|NegCtrlIntron	GGGGTGTATTTGTTTTCTTG	0	255	572	840	0	134	610	534	0	0	458	486	1188	1	615	351	1493	7905	NegCtrlIntron	IntronCtrl|REEP5	2|sgINTRON-REEP5_8|IntronCtrl_REEP5	IntronCtrl_REEP5	ACCGGGGGTGTATTTGTTTTCTTGGTTTAAGAGCTATGCTGGAAACAGCATAGCAAGTTTAAATAAGGCTAGTCCGTTATCAACTTGAAAAAGTGGCACCGAGTCGGTGCTTTTTT
2|sgINTRON-SNRPD3_1|NegCtrlIntron	GCATACAAATACAAGCAGGG	0	565	1044	1087	1	495	1520	599	0	0	1102	567	1	0	683	976	2999	6634	NegCtrlIntron	IntronCtrl|SNRPD3	2|sgINTRON-SNRPD3_1|IntronCtrl_SNRPD3	IntronCtrl_SNRPD3	ACCGGCATACAAATACAAGCAGGGGTTTAAGAGCTATGCTGGAAACAGCATAGCAAGTTTAAATAAGGCTAGTCCGTTATCAACTTGAAAAAGTGGCACCGAGTCGGTGCTTTTTT
2|sgINTRON-SNRPD3_2|NegCtrlIntron	AGGTTTTGATAGACCCAGTG	0	0	839	813	3	648	102	822	0	0	1255	734	1948	2445	1835	1585	3125	6634	NegCtrlIntron	IntronCtrl|SNRPD3	2|sgINTRON-SNRPD3_2|IntronCtrl_SNRPD3	IntronCtrl_SNRPD3	ACCGAGGTTTTGATAGACCCAGTGGTTTAAGAGCTATGCTGGAAACAGCATAGCAAGTTTAAATAAGGCTAGTCCGTTATCAACTTGAAAAAGTGGCACCGAGTCGGTGCTTTTTT
2|sgINTRON-SNRPD3_3|NegCtrlIntron	GAATAAGAGCCAGCAGACTG	0	1098	706	829	0	0	777	390	7146	0	464	876	1	0	1024	1255	2215	6634	NegCtrlIntron	IntronCtrl|SNRPD3	2|sgINTRON-SNRPD3_3|IntronCtrl_SNRPD3	IntronCtrl_SNRPD3	ACCGGAATAAGAGCCAGCAGACTGGTTTAAGAGCTATGCTGGAAACAGCATAGCAAGTTTAAATAAGGCTAGTCCGTTATCAACTTGAAAAAGTGGCACCGAGTCGGTGCTTTTTT
2|sgINTRON-SNRPD3_4|NegCtrlIntron	TGTGGCGTAGCTAAAGCTGG	0	0	669	612	0	0	86	523	0	0	736	344	4	4470	475	818	2440	6634	NegCtrlIntron	IntronCtrl|SNRPD3	2|sgINTRON-SNRPD3_4|IntronCtrl_SNRPD3	IntronCtrl_SNRPD3	ACCGTGTGGCGTAGCTAAAGCTGGGTTTAAGAGCTATGCTGGAAACAGCATAGCAAGTTTAAATAAGGCTAGTCCGTTATCAACTTGAAAAAGTGGCACCGAGTCGGTGCTTTTTT
2|sgINTRON-SNRPD3_5|NegCtrlIntron	GGCGTAGCTAAAGCTGGTGG	0	0	379	241	1	329	378	194	0	0	277	103	0	0	495	443	1297	6634	NegCtrlIntron	IntronCtrl|SNRPD3	2|sgINTRON-SNRPD3_5|IntronCtrl_SNRPD3	IntronCtrl_SNRPD3	ACCGGGCGTAGCTAAAGCTGGTGGGTTTAAGAGCTATGCTGGAAACAGCATAGCAAGTTTAAATAAGGCTAGTCCGTTATCAACTTGAAAAAGTGGCACCGAGTCGGTGCTTTTTT
2|sgINTRON-SNRPD3_6|NegCtrlIntron	TGGGGTGGGACAAAATGTGG	0	1363	577	302	1109	1	70	224	0	0	510	331	1	3237	490	367	1900	6634	NegCtrlIntron	IntronCtrl|SNRPD3	2|sgINTRON-SNRPD3_6|IntronCtrl_SNRPD3	IntronCtrl_SNRPD3	ACCGTGGGGTGGGACAAAATGTGGGTTTAAGAGCTATGCTGGAAACAGCATAGCAAGTTTAAATAAGGCTAGTCCGTTATCAACTTGAAAAAGTGGCACCGAGTCGGTGCTTTTTT
2|sgINTRON-SNRPD3_7|NegCtrlIntron	GCTGTCCCCCACCATTGGTC	2734	271	1098	627	3	603	907	703	0	0	944	293	1208	906	925	587	3348	6634	NegCtrlIntron	IntronCtrl|SNRPD3	2|sgINTRON-SNRPD3_7|IntronCtrl_SNRPD3	IntronCtrl_SNRPD3	ACCGGCTGTCCCCCACCATTGGTCGTTTAAGAGCTATGCTGGAAACAGCATAGCAAGTTTAAATAAGGCTAGTCCGTTATCAACTTGAAAAAGTGGCACCGAGTCGGTGCTTTTTT
2|sgINTRON-SNRPD3_8|NegCtrlIntron	AGGCCTCTACATCCTGTTAC	2981	1515	767	828	4	971	575	709	0	457	1195	435	2180	1182	598	978	3186	6634	NegCtrlIntron	IntronCtrl|SNRPD3	2|sgINTRON-SNRPD3_8|IntronCtrl_SNRPD3	IntronCtrl_SNRPD3	ACCGAGGCCTCTACATCCTGTTACGTTTAAGAGCTATGCTGGAAACAGCATAGCAAGTTTAAATAAGGCTAGTCCGTTATCAACTTGAAAAAGTGGCACCGAGTCGGTGCTTTTTT
2|sgINTRON-UBC_1|NegCtrlIntron	GGTTTTGAACTATGCGCTCG	1860	2108	1355	1340	1359	416	679	1272	0	0	1316	787	1	2129	1766	2532	4056	7316	NegCtrlIntron	IntronCtrl|UBC	2|sgINTRON-UBC_1|IntronCtrl_UBC	IntronCtrl_UBC	ACCGGGTTTTGAACTATGCGCTCGGTTTAAGAGCTATGCTGGAAACAGCATAGCAAGTTTAAATAAGGCTAGTCCGTTATCAACTTGAAAAAGTGGCACCGAGTCGGTGCTTTTTT
2|sgINTRON-UBC_2|NegCtrlIntron	GGCGCCGGACCTCTGGTGAG	4033	1112	768	532	224	0	341	232	0	0	320	594	0	0	939	832	2311	7316	NegCtrlIntron	IntronCtrl|UBC	2|sgINTRON-UBC_2|IntronCtrl_UBC	IntronCtrl_UBC	ACCGGGCGCCGGACCTCTGGTGAGGTTTAAGAGCTATGCTGGAAACAGCATAGCAAGTTTAAATAAGGCTAGTCCGTTATCAACTTGAAAAAGTGGCACCGAGTCGGTGCTTTTTT
2|sgINTRON-UBC_3|NegCtrlIntron	GCCACCTGCCGGTAGGTGTG	0	470	579	590	0	0	383	213	0	0	1233	573	1	682	789	1004	1812	7316	NegCtrlIntron	IntronCtrl|UBC	2|sgINTRON-UBC_3|IntronCtrl_UBC	IntronCtrl_UBC	ACCGGCCACCTGCCGGTAGGTGTGGTTTAAGAGCTATGCTGGAAACAGCATAGCAAGTTTAAATAAGGCTAGTCCGTTATCAACTTGAAAAAGTGGCACCGAGTCGGTGCTTTTTT
2|sgINTRON-UBC_4|NegCtrlIntron	TGTTGGCTTATAATGCAGGG	5792	2230	1779	1313	1626	1112	319	1262	0	2552	755	557	2238	5433	1218	1425	3021	7316	NegCtrlIntron	IntronCtrl|UBC	2|sgINTRON-UBC_4|IntronCtrl_UBC	IntronCtrl_UBC	ACCGTGTTGGCTTATAATGCAGGGGTTTAAGAGCTATGCTGGAAACAGCATAGCAAGTTTAAATAAGGCTAGTCCGTTATCAACTTGAAAAAGTGGCACCGAGTCGGTGCTTTTTT
2|sgINTRON-UBC_5|NegCtrlIntron	GGTGACGTCACGACACGACG	0	3314	1295	1036	773	500	1161	1047	0	1953	1042	742	0	0	1187	2429	3546	7316	NegCtrlIntron	IntronCtrl|UBC	2|sgINTRON-UBC_5|IntronCtrl_UBC	IntronCtrl_UBC	ACCGGGTGACGTCACGACACGACGGTTTAAGAGCTATGCTGGAAACAGCATAGCAAGTTTAAATAAGGCTAGTCCGTTATCAACTTGAAAAAGTGGCACCGAGTCGGTGCTTTTTT
2|sgINTRON-UBC_6|NegCtrlIntron	TGCGGGGGCGGCAGTTATGG	4015	2340	1893	1380	1688	735	1636	1270	0	2363	2128	1132	1499	4679	1971	2600	4844	7316	NegCtrlIntron	IntronCtrl|UBC	2|sgINTRON-UBC_6|IntronCtrl_UBC	IntronCtrl_UBC	ACCGTGCGGGGGCGGCAGTTATGGGTTTAAGAGCTATGCTGGAAACAGCATAGCAAGTTTAAATAAGGCTAGTCCGTTATCAACTTGAAAAAGTGGCACCGAGTCGGTGCTTTTTT
2|sgINTRON-UBC_7|NegCtrlIntron	CGGTTTGTCGTCTGTTGCGG	3611	353	1406	1199	3	635	1127	1181	0	0	1753	747	0	1653	1392	1045	5727	7316	NegCtrlIntron	IntronCtrl|UBC	2|sgINTRON-UBC_7|IntronCtrl_UBC	IntronCtrl_UBC	ACCGCGGTTTGTCGTCTGTTGCGGGTTTAAGAGCTATGCTGGAAACAGCATAGCAAGTTTAAATAAGGCTAGTCCGTTATCAACTTGAAAAAGTGGCACCGAGTCGGTGCTTTTTT
2|sgINTRON-UBC_8|NegCtrlIntron	GGCAAGAACCCAAGGTCTTG	0	178	1097	1156	0	0	1337	1280	14132	3668	1889	665	4679	1232	977	1688	3870	7316	NegCtrlIntron	IntronCtrl|UBC	2|sgINTRON-UBC_8|IntronCtrl_UBC	IntronCtrl_UBC	ACCGGGCAAGAACCCAAGGTCTTGGTTTAAGAGCTATGCTGGAAACAGCATAGCAAGTTTAAATAAGGCTAGTCCGTTATCAACTTGAAAAAGTGGCACCGAGTCGGTGCTTTTTT
2|sgINTRON-VCP_1|NegCtrlIntron	CGCTCTCTCTTTTTTAAGAG	0	0	596	477	1634	1	813	580	0	0	752	414	0	0	851	814	1566	7415	NegCtrlIntron	IntronCtrl|VCP	2|sgINTRON-VCP_1|IntronCtrl_VCP	IntronCtrl_VCP	ACCGCGCTCTCTCTTTTTTAAGAGGTTTAAGAGCTATGCTGGAAACAGCATAGCAAGTTTAAATAAGGCTAGTCCGTTATCAACTTGAAAAAGTGGCACCGAGTCGGTGCTTTTTT
2|sgINTRON-VCP_2|NegCtrlIntron	AGAAACTAGTTTAGAGGCAG	3132	0	1371	1257	2	0	1152	974	1	6040	1142	807	2396	602	760	2211	3905	7415	NegCtrlIntron	IntronCtrl|VCP	2|sgINTRON-VCP_2|IntronCtrl_VCP	IntronCtrl_VCP	ACCGAGAAACTAGTTTAGAGGCAGGTTTAAGAGCTATGCTGGAAACAGCATAGCAAGTTTAAATAAGGCTAGTCCGTTATCAACTTGAAAAAGTGGCACCGAGTCGGTGCTTTTTT
2|sgINTRON-VCP_3|NegCtrlIntron	AGTGGCAGACTTTTGGAATG	1	1683	1757	1737	1557	824	1898	955	0	0	1616	727	5519	5	1337	2808	4570	7415	NegCtrlIntron	IntronCtrl|VCP	2|sgINTRON-VCP_3|IntronCtrl_VCP	IntronCtrl_VCP	ACCGAGTGGCAGACTTTTGGAATGGTTTAAGAGCTATGCTGGAAACAGCATAGCAAGTTTAAATAAGGCTAGTCCGTTATCAACTTGAAAAAGTGGCACCGAGTCGGTGCTTTTTT
2|sgINTRON-VCP_4|NegCtrlIntron	GACAGGAGTGGGAGAGCTCG	2139	1166	1449	855	2	178	1258	1044	0	3055	1942	970	1675	5427	1306	627	3810	7415	NegCtrlIntron	IntronCtrl|VCP	2|sgINTRON-VCP_4|IntronCtrl_VCP	IntronCtrl_VCP	ACCGGACAGGAGTGGGAGAGCTCGGTTTAAGAGCTATGCTGGAAACAGCATAGCAAGTTTAAATAAGGCTAGTCCGTTATCAACTTGAAAAAGTGGCACCGAGTCGGTGCTTTTTT
2|sgINTRON-VCP_5|NegCtrlIntron	GTATTTTGATGGGACAGGAG	0	721	767	1001	0	585	899	504	0	0	899	419	0	1346	1505	1183	2038	7415	NegCtrlIntron	IntronCtrl|VCP	2|sgINTRON-VCP_5|IntronCtrl_VCP	IntronCtrl_VCP	ACCGGTATTTTGATGGGACAGGAGGTTTAAGAGCTATGCTGGAAACAGCATAGCAAGTTTAAATAAGGCTAGTCCGTTATCAACTTGAAAAAGTGGCACCGAGTCGGTGCTTTTTT
2|sgINTRON-VCP_6|NegCtrlIntron	CGGGATGGTAGGCAGAATGG	0	1837	995	1222	0	1092	904	1084	1	9337	1731	666	3	996	1499	2308	3770	7415	NegCtrlIntron	IntronCtrl|VCP	2|sgINTRON-VCP_6|IntronCtrl_VCP	IntronCtrl_VCP	ACCGCGGGATGGTAGGCAGAATGGGTTTAAGAGCTATGCTGGAAACAGCATAGCAAGTTTAAATAAGGCTAGTCCGTTATCAACTTGAAAAAGTGGCACCGAGTCGGTGCTTTTTT
2|sgINTRON-VCP_7|NegCtrlIntron	GTAGGTAGATGGGGAATTAG	0	1310	1091	797	1	1063	349	800	0	0	615	539	1	729	1019	1065	2389	7415	NegCtrlIntron	IntronCtrl|VCP	2|sgINTRON-VCP_7|IntronCtrl_VCP	IntronCtrl_VCP	ACCGGTAGGTAGATGGGGAATTAGGTTTAAGAGCTATGCTGGAAACAGCATAGCAAGTTTAAATAAGGCTAGTCCGTTATCAACTTGAAAAAGTGGCACCGAGTCGGTGCTTTTTT
2|sgINTRON-VCP_8|NegCtrlIntron	GCAGTTCTGGACACTCTTTG	0	2092	1053	888	1105	446	547	637	1	0	889	375	1587	1169	1325	1282	2458	7415	NegCtrlIntron	IntronCtrl|VCP	2|sgINTRON-VCP_8|IntronCtrl_VCP	IntronCtrl_VCP	ACCGGCAGTTCTGGACACTCTTTGGTTTAAGAGCTATGCTGGAAACAGCATAGCAAGTTTAAATAAGGCTAGTCCGTTATCAACTTGAAAAAGTGGCACCGAGTCGGTGCTTTTTT
3|sgCDC16_CC_1|CDC16_PosCtrl	TCAACACCAGTGCCTGACGG	0	0	82	157	1	0	262	43	1	1118	269	212	0	0	266	132	3314	8881	CDC16_PosCtrl	GenLethal|CDC16	3|sg_hCDC16_CC_1|CDC16_PosCtrl	CDC16_PosCtrl	ACCGTCAACACCAGTGCCTGACGGGTTTAAGAGCTATGCTGGAAACAGCATAGCAAGTTTAAATAAGGCTAGTCCGTTATCAACTTGAAAAAGTGGCACCGAGTCGGTGCTTTTTT
3|sgCDC16_CC_2|CDC16_PosCtrl	AAAGTAGCTTCACTCTCTCG	0	0	190	69	0	0	274	222	0	0	395	124	0	0	437	322	2233	8881	CDC16_PosCtrl	GenLethal|CDC16	3|sg_hCDC16_CC_2|CDC16_PosCtrl	CDC16_PosCtrl	ACCGAAAGTAGCTTCACTCTCTCGGTTTAAGAGCTATGCTGGAAACAGCATAGCAAGTTTAAATAAGGCTAGTCCGTTATCAACTTGAAAAAGTGGCACCGAGTCGGTGCTTTTTT
3|sgCDC16_CC_3|CDC16_PosCtrl	GAGCCAACCAATAGATGTCC	0	944	303	213	1	230	18	398	1	2108	339	79	0	779	274	146	2785	8881	CDC16_PosCtrl	GenLethal|CDC16	3|sg_hCDC16_CC_3|CDC16_PosCtrl	CDC16_PosCtrl	ACCGGAGCCAACCAATAGATGTCCGTTTAAGAGCTATGCTGGAAACAGCATAGCAAGTTTAAATAAGGCTAGTCCGTTATCAACTTGAAAAAGTGGCACCGAGTCGGTGCTTTTTT
3|sgCDC16_CC_4|CDC16_PosCtrl	GCGCCGCCATGAACCTAGAG	0	0	113	98	0	210	0	13	0	3653	531	32	0	0	222	142	2089	8881	CDC16_PosCtrl	GenLethal|CDC16	3|sg_hCDC16_CC_4|CDC16_PosCtrl	CDC16_PosCtrl	ACCGGCGCCGCCATGAACCTAGAGGTTTAAGAGCTATGCTGGAAACAGCATAGCAAGTTTAAATAAGGCTAGTCCGTTATCAACTTGAAAAAGTGGCACCGAGTCGGTGCTTTTTT
3|sgGTF2B_CC_1|GTF2B_PosCtrl	ACAAAGGTTGGAACAGAACC	4569	1014	481	755	0	880	56	611	0	0	452	298	1	1925	391	252	4446	2959	GTF2B_PosCtrl	GenLethal|GTF2B	3|sg_hGTF2B_CC_1|GTF2B_PosCtrl	GTF2B_PosCtrl	ACCGACAAAGGTTGGAACAGAACCGTTTAAGAGCTATGCTGGAAACAGCATAGCAAGTTTAAATAAGGCTAGTCCGTTATCAACTTGAAAAAGTGGCACCGAGTCGGTGCTTTTTT
3|sgGTF2B_CC_2|GTF2B_PosCtrl	GGTGACCGGGTTATTGATGT	0	0	150	114	0	0	200	197	0	0	394	17	0	0	168	248	1992	2959	GTF2B_PosCtrl	GenLethal|GTF2B	3|sg_hGTF2B_CC_2|GTF2B_PosCtrl	GTF2B_PosCtrl	ACCGGGTGACCGGGTTATTGATGTGTTTAAGAGCTATGCTGGAAACAGCATAGCAAGTTTAAATAAGGCTAGTCCGTTATCAACTTGAAAAAGTGGCACCGAGTCGGTGCTTTTTT
3|sgGTF2B_CC_3|GTF2B_PosCtrl	TTAGTGGAGGACTACAGAGC	0	521	168	61	0	248	505	135	0	0	130	83	0	0	260	3	2517	2959	GTF2B_PosCtrl	GenLethal|GTF2B	3|sg_hGTF2B_CC_3|GTF2B_PosCtrl	GTF2B_PosCtrl	ACCGTTAGTGGAGGACTACAGAGCGTTTAAGAGCTATGCTGGAAACAGCATAGCAAGTTTAAATAAGGCTAGTCCGTTATCAACTTGAAAAAGTGGCACCGAGTCGGTGCTTTTTT
3|sgGTF2B_CC_4|GTF2B_PosCtrl	ACATATAGCCCGTAAAGCTG	1912	277	126	278	0	0	0	52	0	6147	148	152	1	1452	267	467	2462	2959	GTF2B_PosCtrl	GenLethal|GTF2B	3|sg_hGTF2B_CC_4|GTF2B_PosCtrl	GTF2B_PosCtrl	ACCGACATATAGCCCGTAAAGCTGGTTTAAGAGCTATGCTGGAAACAGCATAGCAAGTTTAAATAAGGCTAGTCCGTTATCAACTTGAAAAAGTGGCACCGAGTCGGTGCTTTTTT
3|sgHSPA5_CC_1|HSPA5_PosCtrl	CGTTGGCGATGATCTCCACG	0	405	180	205	0	0	261	167	0	0	114	94	1237	1	171	330	2413	3309	HSPA5_PosCtrl	GenLethal|HSPA5	3|sg_hHSPA5_CC_1|HSPA5_PosCtrl	HSPA5_PosCtrl	ACCGCGTTGGCGATGATCTCCACGGTTTAAGAGCTATGCTGGAAACAGCATAGCAAGTTTAAATAAGGCTAGTCCGTTATCAACTTGAAAAAGTGGCACCGAGTCGGTGCTTTTTT
3|sgHSPA5_CC_2|HSPA5_PosCtrl	TGGCCTTTTCTACCTCGCGC	0	0	850	400	3155	151	500	466	0	0	631	250	1	0	877	344	3559	3309	HSPA5_PosCtrl	GenLethal|HSPA5	3|sg_hHSPA5_CC_2|HSPA5_PosCtrl	HSPA5_PosCtrl	ACCGTGGCCTTTTCTACCTCGCGCGTTTAAGAGCTATGCTGGAAACAGCATAGCAAGTTTAAATAAGGCTAGTCCGTTATCAACTTGAAAAAGTGGCACCGAGTCGGTGCTTTTTT
3|sgHSPA5_CC_3|HSPA5_PosCtrl	AATGGAGATACTCATCTGGG	0	0	372	178	0	0	11	243	1	0	292	176	0	0	448	795	2451	3309	HSPA5_PosCtrl	GenLethal|HSPA5	3|sg_hHSPA5_CC_3|HSPA5_PosCtrl	HSPA5_PosCtrl	ACCGAATGGAGATACTCATCTGGGGTTTAAGAGCTATGCTGGAAACAGCATAGCAAGTTTAAATAAGGCTAGTCCGTTATCAACTTGAAAAAGTGGCACCGAGTCGGTGCTTTTTT
3|sgHSPA5_CC_4|HSPA5_PosCtrl	GAAGCCCGTCCAGAAAGTGT	0	0	333	246	3752	350	614	385	0	977	474	349	0	0	520	692	4666	3309	HSPA5_PosCtrl	GenLethal|HSPA5	3|sg_hHSPA5_CC_4|HSPA5_PosCtrl	HSPA5_PosCtrl	ACCGGAAGCCCGTCCAGAAAGTGTGTTTAAGAGCTATGCTGGAAACAGCATAGCAAGTTTAAATAAGGCTAGTCCGTTATCAACTTGAAAAAGTGGCACCGAGTCGGTGCTTTTTT
3|sgHSPA9_CC_1|HSPA9_PosCtrl	CAATCTGAGGAACTCCACGA	0	604	173	162	0	251	218	100	0	0	417	22	0	0	547	334	2023	3313	HSPA9_PosCtrl	GenLethal|HSPA9	3|sg_hHSPA9_CC_1|HSPA9_PosCtrl	HSPA9_PosCtrl	ACCGCAATCTGAGGAACTCCACGAGTTTAAGAGCTATGCTGGAAACAGCATAGCAAGTTTAAATAAGGCTAGTCCGTTATCAACTTGAAAAAGTGGCACCGAGTCGGTGCTTTTTT
3|sgHSPA9_CC_2|HSPA9_PosCtrl	AGGCTGCGGCGCCCACGAGA	0	1536	465	508	1093	0	720	180	0	0	699	248	1423	1582	384	272	3928	3313	HSPA9_PosCtrl	GenLethal|HSPA9	3|sg_hHSPA9_CC_2|HSPA9_PosCtrl	HSPA9_PosCtrl	ACCGAGGCTGCGGCGCCCACGAGAGTTTAAGAGCTATGCTGGAAACAGCATAGCAAGTTTAAATAAGGCTAGTCCGTTATCAACTTGAAAAAGTGGCACCGAGTCGGTGCTTTTTT
3|sgHSPA9_CC_3|HSPA9_PosCtrl	ACTTTGACCAGGCCTTGCTA	0	0	343	320	0	0	166	90	0	1864	282	251	0	0	239	742	3286	3313	HSPA9_PosCtrl	GenLethal|HSPA9	3|sg_hHSPA9_CC_3|HSPA9_PosCtrl	HSPA9_PosCtrl	ACCGACTTTGACCAGGCCTTGCTAGTTTAAGAGCTATGCTGGAAACAGCATAGCAAGTTTAAATAAGGCTAGTCCGTTATCAACTTGAAAAAGTGGCACCGAGTCGGTGCTTTTTT
3|sgHSPA9_CC_4|HSPA9_PosCtrl	ACCTTCCATAACTGCCACGC	0	752	556	251	1	0	631	274	0	1	1135	183	5734	2	364	599	6388	3313	HSPA9_PosCtrl	GenLethal|HSPA9	3|sg_hHSPA9_CC_4|HSPA9_PosCtrl	HSPA9_PosCtrl	ACCGACCTTCCATAACTGCCACGCGTTTAAGAGCTATGCTGGAAACAGCATAGCAAGTTTAAATAAGGCTAGTCCGTTATCAACTTGAAAAAGTGGCACCGAGTCGGTGCTTTTTT
3|sgPAFAH1B1_CC_1|PAFAH1B1_PosCtrl	CGAGGCGTACATACCCAAGG	0	1	183	60	0	0	0	143	0	0	317	91	0	1	238	766	2397	5048	PAFAH1B1_PosCtrl	GenLethal|PAFAH1B1	3|sg_hPAFAH1B1_CC_1|PAFAH1B1_PosCtrl	PAFAH1B1_PosCtrl	ACCGCGAGGCGTACATACCCAAGGGTTTAAGAGCTATGCTGGAAACAGCATAGCAAGTTTAAATAAGGCTAGTCCGTTATCAACTTGAAAAAGTGGCACCGAGTCGGTGCTTTTTT
3|sgPAFAH1B1_CC_2|PAFAH1B1_PosCtrl	ATGGTACGGCCAAATCAAGA	0	0	205	202	1	0	340	185	0	0	91	96	0	0	341	128	2008	5048	PAFAH1B1_PosCtrl	GenLethal|PAFAH1B1	3|sg_hPAFAH1B1_CC_2|PAFAH1B1_PosCtrl	PAFAH1B1_PosCtrl	ACCGATGGTACGGCCAAATCAAGAGTTTAAGAGCTATGCTGGAAACAGCATAGCAAGTTTAAATAAGGCTAGTCCGTTATCAACTTGAAAAAGTGGCACCGAGTCGGTGCTTTTTT
3|sgPAFAH1B1_CC_3|PAFAH1B1_PosCtrl	TCTTGTAATCCCATACGCGT	0	526	380	194	0	0	3	181	0	0	224	155	4000	5	272	180	2835	5048	PAFAH1B1_PosCtrl	GenLethal|PAFAH1B1	3|sg_hPAFAH1B1_CC_3|PAFAH1B1_PosCtrl	PAFAH1B1_PosCtrl	ACCGTCTTGTAATCCCATACGCGTGTTTAAGAGCTATGCTGGAAACAGCATAGCAAGTTTAAATAAGGCTAGTCCGTTATCAACTTGAAAAAGTGGCACCGAGTCGGTGCTTTTTT
3|sgPAFAH1B1_CC_4|PAFAH1B1_PosCtrl	ATTCACAGGACACAGAGAAT	0	0	426	496	1576	637	260	198	0	2327	826	432	0	0	297	1344	4874	5048	PAFAH1B1_PosCtrl	GenLethal|PAFAH1B1	3|sg_hPAFAH1B1_CC_4|PAFAH1B1_PosCtrl	PAFAH1B1_PosCtrl	ACCGATTCACAGGACACAGAGAATGTTTAAGAGCTATGCTGGAAACAGCATAGCAAGTTTAAATAAGGCTAGTCCGTTATCAACTTGAAAAAGTGGCACCGAGTCGGTGCTTTTTT
3|sgPCNA_CC_1|PCNA_PosCtrl	CCAGGGCTCCATCCTCAAGA	0	0	79	107	739	0	0	79	1116	0	160	29	0	0	139	144	1620	5111	PCNA_PosCtrl	GenLethal|PCNA	3|sg_hPCNA_CC_1|PCNA_PosCtrl	PCNA_PosCtrl	ACCGCCAGGGCTCCATCCTCAAGAGTTTAAGAGCTATGCTGGAAACAGCATAGCAAGTTTAAATAAGGCTAGTCCGTTATCAACTTGAAAAAGTGGCACCGAGTCGGTGCTTTTTT
3|sgPCNA_CC_2|PCNA_PosCtrl	TGAGCTGCACCAAAGAGACG	1822	560	209	161	0	358	372	155	0	0	318	63	0	0	401	74	2914	5111	PCNA_PosCtrl	GenLethal|PCNA	3|sg_hPCNA_CC_2|PCNA_PosCtrl	PCNA_PosCtrl	ACCGTGAGCTGCACCAAAGAGACGGTTTAAGAGCTATGCTGGAAACAGCATAGCAAGTTTAAATAAGGCTAGTCCGTTATCAACTTGAAAAAGTGGCACCGAGTCGGTGCTTTTTT
3|sgPCNA_CC_3|PCNA_PosCtrl	ATGTCTGCAGATGTACCCCT	0	0	87	36	1	327	0	185	0	0	335	88	1	0	273	548	2444	5111	PCNA_PosCtrl	GenLethal|PCNA	3|sg_hPCNA_CC_3|PCNA_PosCtrl	PCNA_PosCtrl	ACCGATGTCTGCAGATGTACCCCTGTTTAAGAGCTATGCTGGAAACAGCATAGCAAGTTTAAATAAGGCTAGTCCGTTATCAACTTGAAAAAGTGGCACCGAGTCGGTGCTTTTTT
3|sgPCNA_CC_4|PCNA_PosCtrl	CGAAGATAACGCGGATACCT	0	0	106	176	0	0	3	323	0	0	370	211	0	0	213	430	3562	5111	PCNA_PosCtrl	GenLethal|PCNA	3|sg_hPCNA_CC_4|PCNA_PosCtrl	PCNA_PosCtrl	ACCGCGAAGATAACGCGGATACCTGTTTAAGAGCTATGCTGGAAACAGCATAGCAAGTTTAAATAAGGCTAGTCCGTTATCAACTTGAAAAAGTGGCACCGAGTCGGTGCTTTTTT
3|sgPOLR2L_CC_1|POLR2L_PosCtrl	GCTGCAGGCCGAGTACACCG	0	0	103	78	1	0	94	127	0	0	65	8	0	0	69	109	1756	5441	POLR2L_PosCtrl	GenLethal|POLR2L	3|sg_hPOLR2L_CC_1|POLR2L_PosCtrl	POLR2L_PosCtrl	ACCGGCTGCAGGCCGAGTACACCGGTTTAAGAGCTATGCTGGAAACAGCATAGCAAGTTTAAATAAGGCTAGTCCGTTATCAACTTGAAAAAGTGGCACCGAGTCGGTGCTTTTTT
3|sgPOLR2L_CC_2|POLR2L_PosCtrl	ACAAGTGGGAGGCTTACCTG	0	0	254	205	0	245	475	140	0	0	454	233	0	1330	136	377	4345	5441	POLR2L_PosCtrl	GenLethal|POLR2L	3|sg_hPOLR2L_CC_2|POLR2L_PosCtrl	POLR2L_PosCtrl	ACCGACAAGTGGGAGGCTTACCTGGTTTAAGAGCTATGCTGGAAACAGCATAGCAAGTTTAAATAAGGCTAGTCCGTTATCAACTTGAAAAAGTGGCACCGAGTCGGTGCTTTTTT
3|sgPOLR2L_CC_3|POLR2L_PosCtrl	GCAGCGTACAGGGATGATCA	0	1	341	162	0	959	111	393	0	0	335	233	0	1	531	275	4977	5441	POLR2L_PosCtrl	GenLethal|POLR2L	3|sg_hPOLR2L_CC_3|POLR2L_PosCtrl	POLR2L_PosCtrl	ACCGGCAGCGTACAGGGATGATCAGTTTAAGAGCTATGCTGGAAACAGCATAGCAAGTTTAAATAAGGCTAGTCCGTTATCAACTTGAAAAAGTGGCACCGAGTCGGTGCTTTTTT
3|sgPOLR2L_CC_4|POLR2L_PosCtrl	GCAGTAGCGCTTCAGGCCCA	3467	1	181	128	0	0	126	28	0	0	329	44	0	0	205	121	2565	5441	POLR2L_PosCtrl	GenLethal|POLR2L	3|sg_hPOLR2L_CC_4|POLR2L_PosCtrl	POLR2L_PosCtrl	ACCGGCAGTAGCGCTTCAGGCCCAGTTTAAGAGCTATGCTGGAAACAGCATAGCAAGTTTAAATAAGGCTAGTCCGTTATCAACTTGAAAAAGTGGCACCGAGTCGGTGCTTTTTT
3|sgRPL9_CC_1|RPL9_PosCtrl	CAAATGGTGGGGTAACAGAA	0	812	369	365	1	0	133	225	0	2083	1016	218	1	0	664	633	5709	6133	RPL9_PosCtrl	GenLethal|RPL9	3|sg_hRPL9_CC_1|RPL9_PosCtrl	RPL9_PosCtrl	ACCGCAAATGGTGGGGTAACAGAAGTTTAAGAGCTATGCTGGAAACAGCATAGCAAGTTTAAATAAGGCTAGTCCGTTATCAACTTGAAAAAGTGGCACCGAGTCGGTGCTTTTTT
3|sgRPL9_CC_2|RPL9_PosCtrl	GAAAGGAACTGGCTACCGTT	0	594	193	134	0	0	168	63	0	0	118	77	2728	2	88	103	2378	6133	RPL9_PosCtrl	GenLethal|RPL9	3|sg_hRPL9_CC_2|RPL9_PosCtrl	RPL9_PosCtrl	ACCGGAAAGGAACTGGCTACCGTTGTTTAAGAGCTATGCTGGAAACAGCATAGCAAGTTTAAATAAGGCTAGTCCGTTATCAACTTGAAAAAGTGGCACCGAGTCGGTGCTTTTTT
3|sgRPL9_CC_3|RPL9_PosCtrl	AGGGCTTCCGTTACAAGATG	0	0	200	150	0	0	15	170	0	0	254	193	0	4	223	380	2095	6133	RPL9_PosCtrl	GenLethal|RPL9	3|sg_hRPL9_CC_3|RPL9_PosCtrl	RPL9_PosCtrl	ACCGAGGGCTTCCGTTACAAGATGGTTTAAGAGCTATGCTGGAAACAGCATAGCAAGTTTAAATAAGGCTAGTCCGTTATCAACTTGAAAAAGTGGCACCGAGTCGGTGCTTTTTT
3|sgRPL9_CC_4|RPL9_PosCtrl	GAACAAGCAACACCTAAAAG	0	0	294	235	0	0	0	201	0	0	338	99	0	1005	297	488	2670	6133	RPL9_PosCtrl	GenLethal|RPL9	3|sg_hRPL9_CC_4|RPL9_PosCtrl	RPL9_PosCtrl	ACCGGAACAAGCAACACCTAAAAGGTTTAAGAGCTATGCTGGAAACAGCATAGCAAGTTTAAATAAGGCTAGTCCGTTATCAACTTGAAAAAGTGGCACCGAGTCGGTGCTTTTTT
3|sgSF3A3_CC_1|SF3A3_PosCtrl	TGAGGAGAAGGAACGGCTCA	1418	782	801	346	1	160	782	408	15744	4	749	423	1	1664	753	936	6835	10946	SF3A3_PosCtrl	GenLethal|SF3A3	3|sg_hSF3A3_CC_1|SF3A3_PosCtrl	SF3A3_PosCtrl	ACCGTGAGGAGAAGGAACGGCTCAGTTTAAGAGCTATGCTGGAAACAGCATAGCAAGTTTAAATAAGGCTAGTCCGTTATCAACTTGAAAAAGTGGCACCGAGTCGGTGCTTTTTT
3|sgSF3A3_CC_2|SF3A3_PosCtrl	GGAAGAATGCAGAGTATAAG	0	558	443	284	0	108	211	84	0	0	204	87	2369	1388	351	505	2806	10946	SF3A3_PosCtrl	GenLethal|SF3A3	3|sg_hSF3A3_CC_2|SF3A3_PosCtrl	SF3A3_PosCtrl	ACCGGGAAGAATGCAGAGTATAAGGTTTAAGAGCTATGCTGGAAACAGCATAGCAAGTTTAAATAAGGCTAGTCCGTTATCAACTTGAAAAAGTGGCACCGAGTCGGTGCTTTTTT
3|sgSF3A3_CC_3|SF3A3_PosCtrl	GGAATTTGAGGAACTCCTGA	3382	0	678	269	514	295	192	331	1	0	339	361	2	1722	379	419	2221	10946	SF3A3_PosCtrl	GenLethal|SF3A3	3|sg_hSF3A3_CC_3|SF3A3_PosCtrl	SF3A3_PosCtrl	ACCGGGAATTTGAGGAACTCCTGAGTTTAAGAGCTATGCTGGAAACAGCATAGCAAGTTTAAATAAGGCTAGTCCGTTATCAACTTGAAAAAGTGGCACCGAGTCGGTGCTTTTTT
3|sgSF3A3_CC_4|SF3A3_PosCtrl	GCTCACCGGCCATCCAGGAA	5551	38	247	157	1692	0	0	208	0	0	514	154	0	0	190	862	2280	10946	SF3A3_PosCtrl	GenLethal|SF3A3	3|sg_hSF3A3_CC_4|SF3A3_PosCtrl	SF3A3_PosCtrl	ACCGGCTCACCGGCCATCCAGGAAGTTTAAGAGCTATGCTGGAAACAGCATAGCAAGTTTAAATAAGGCTAGTCCGTTATCAACTTGAAAAAGTGGCACCGAGTCGGTGCTTTTTT
3|sgSF3B3_CC_1|SF3B3_PosCtrl	ACTGGCCAGGAACGATGCGA	0	0	212	244	0	0	155	469	0	0	242	160	2313	1	63	75	4007	23450	SF3B3_PosCtrl	GenLethal|SF3B3	3|sg_hSF3B3_CC_1|SF3B3_PosCtrl	SF3B3_PosCtrl	ACCGACTGGCCAGGAACGATGCGAGTTTAAGAGCTATGCTGGAAACAGCATAGCAAGTTTAAATAAGGCTAGTCCGTTATCAACTTGAAAAAGTGGCACCGAGTCGGTGCTTTTTT
3|sgSF3B3_CC_2|SF3B3_PosCtrl	GCAGCTCCAAGATCTTCCCA	0	0	161	85	0	218	1	157	0	0	148	107	0	0	141	38	2001	23450	SF3B3_PosCtrl	GenLethal|SF3B3	3|sg_hSF3B3_CC_2|SF3B3_PosCtrl	SF3B3_PosCtrl	ACCGGCAGCTCCAAGATCTTCCCAGTTTAAGAGCTATGCTGGAAACAGCATAGCAAGTTTAAATAAGGCTAGTCCGTTATCAACTTGAAAAAGTGGCACCGAGTCGGTGCTTTTTT
3|sgSF3B3_CC_3|SF3B3_PosCtrl	GAATGAGTACACAGAACGGA	0	0	794	278	0	263	467	222	0	2180	426	153	2	1947	508	931	3806	23450	SF3B3_PosCtrl	GenLethal|SF3B3	3|sg_hSF3B3_CC_3|SF3B3_PosCtrl	SF3B3_PosCtrl	ACCGGAATGAGTACACAGAACGGAGTTTAAGAGCTATGCTGGAAACAGCATAGCAAGTTTAAATAAGGCTAGTCCGTTATCAACTTGAAAAAGTGGCACCGAGTCGGTGCTTTTTT
3|sgSF3B3_CC_4|SF3B3_PosCtrl	GGAGCAGGACAAGGTCGGGG	1383	1	340	277	0	0	0	139	0	0	548	304	0	952	436	691	3042	23450	SF3B3_PosCtrl	GenLethal|SF3B3	3|sg_hSF3B3_CC_4|SF3B3_PosCtrl	SF3B3_PosCtrl	ACCGGGAGCAGGACAAGGTCGGGGGTTTAAGAGCTATGCTGGAAACAGCATAGCAAGTTTAAATAAGGCTAGTCCGTTATCAACTTGAAAAAGTGGCACCGAGTCGGTGCTTTTTT
4|sgA1BG_1|A1BG	CATCTTCTTTCACCTGAACG	0	309	872	887	0	220	524	963	0	0	617	500	0	0	1389	706	2187	1	A1BG	A1BG	4|sg_hA1BG_01|A1BG	A1BG	ACCGCATCTTCTTTCACCTGAACGGTTTAAGAGCTATGCTGGAAACAGCATAGCAAGTTTAAATAAGGCTAGTCCGTTATCAACTTGAAAAAGTGGCACCGAGTCGGTGCTTTTTT
4|sgA1BG_2|A1BG	CTCCGGGGAGAACTCCGGCG	1	0	835	1287	0	904	251	791	0	2135	1485	1313	0	1106	1150	877	3129	1	A1BG	A1BG	4|sg_hA1BG_02|A1BG	A1BG	ACCGCTCCGGGGAGAACTCCGGCGGTTTAAGAGCTATGCTGGAAACAGCATAGCAAGTTTAAATAAGGCTAGTCCGTTATCAACTTGAAAAAGTGGCACCGAGTCGGTGCTTTTTT
4|sgA1BG_3|A1BG	TCTCCATGGTGCATCAGCAC	0	1102	993	821	0	286	775	361	0	3473	756	386	1444	0	588	1030	2847	1	A1BG	A1BG	4|sg_hA1BG_03|A1BG	A1BG	ACCGTCTCCATGGTGCATCAGCACGTTTAAGAGCTATGCTGGAAACAGCATAGCAAGTTTAAATAAGGCTAGTCCGTTATCAACTTGAAAAAGTGGCACCGAGTCGGTGCTTTTTT
4|sgA1BG_4|A1BG	TGGAAGTCCACTCCACTCAG	0	1767	903	696	0	152	301	441	0	0	1412	520	5508	4	760	878	2295	1	A1BG	A1BG	4|sg_hA1BG_04|A1BG	A1BG	ACCGTGGAAGTCCACTCCACTCAGGTTTAAGAGCTATGCTGGAAACAGCATAGCAAGTTTAAATAAGGCTAGTCCGTTATCAACTTGAAAAAGTGGCACCGAGTCGGTGCTTTTTT
4|sgA1CF_1|A1CF	ACAGGAAGAATTCAGTTATG	0	1	813	615	0	1000	806	566	0	0	938	391	0	1444	702	1931	2114	29974	A1CF	A1CF	4|sg_hA1CF_01|A1CF	A1CF	ACCGACAGGAAGAATTCAGTTATGGTTTAAGAGCTATGCTGGAAACAGCATAGCAAGTTTAAATAAGGCTAGTCCGTTATCAACTTGAAAAAGTGGCACCGAGTCGGTGCTTTTTT
4|sgA1CF_2|A1CF	AGTTATGTTAGGTATACCCG	3	0	570	782	2	476	220	801	1	0	1504	421	3222	1461	789	1037	2843	29974	A1CF	A1CF	4|sg_hA1CF_02|A1CF	A1CF	ACCGAGTTATGTTAGGTATACCCGGTTTAAGAGCTATGCTGGAAACAGCATAGCAAGTTTAAATAAGGCTAGTCCGTTATCAACTTGAAAAAGTGGCACCGAGTCGGTGCTTTTTT
4|sgA1CF_3|A1CF	CTTCATTTCCCAGCCACCAA	0	3030	976	1102	0	2	1041	907	0	0	811	657	0	971	679	815	2046	29974	A1CF	A1CF	4|sg_hA1CF_03|A1CF	A1CF	ACCGCTTCATTTCCCAGCCACCAAGTTTAAGAGCTATGCTGGAAACAGCATAGCAAGTTTAAATAAGGCTAGTCCGTTATCAACTTGAAAAAGTGGCACCGAGTCGGTGCTTTTTT
4|sgA1CF_4|A1CF	GAATTCAACAATATCAAACC	7945	5182	1894	2168	1063	1510	922	1180	0	2810	1373	768	1	1096	1345	1615	5655	29974	A1CF	A1CF	4|sg_hA1CF_04|A1CF	A1CF	ACCGGAATTCAACAATATCAAACCGTTTAAGAGCTATGCTGGAAACAGCATAGCAAGTTTAAATAAGGCTAGTCCGTTATCAACTTGAAAAAGTGGCACCGAGTCGGTGCTTTTTT
4|sgA2M_1|A2M	ACTGCATCTGTGCAAACGGG	10439	2093	2043	1895	3631	1896	2109	1449	0	0	1989	1585	6130	3358	1685	1493	4550	2	A2M	A2M	4|sg_hA2M_01|A2M	A2M	ACCGACTGCATCTGTGCAAACGGGGTTTAAGAGCTATGCTGGAAACAGCATAGCAAGTTTAAATAAGGCTAGTCCGTTATCAACTTGAAAAAGTGGCACCGAGTCGGTGCTTTTTT
4|sgA2M_2|A2M	ATGTCTCATGAACTACCCTG	0	1619	790	534	0	685	421	668	0	0	1630	377	0	0	577	1102	2196	2	A2M	A2M	4|sg_hA2M_02|A2M	A2M	ACCGATGTCTCATGAACTACCCTGGTTTAAGAGCTATGCTGGAAACAGCATAGCAAGTTTAAATAAGGCTAGTCCGTTATCAACTTGAAAAAGTGGCACCGAGTCGGTGCTTTTTT
4|sgA2M_3|A2M	TGAAATGAAACTTCACACTG	0	337	1124	1149	1	437	565	692	0	1	733	286	0	0	723	897	2152	2	A2M	A2M	4|sg_hA2M_03|A2M	A2M	ACCGTGAAATGAAACTTCACACTGGTTTAAGAGCTATGCTGGAAACAGCATAGCAAGTTTAAATAAGGCTAGTCCGTTATCAACTTGAAAAAGTGGCACCGAGTCGGTGCTTTTTT
4|sgA2M_4|A2M	TTACTCATATAGGATCCCAA	0	1073	949	880	1	489	193	255	0	0	784	525	3831	1372	841	1077	2571	2	A2M	A2M	4|sg_hA2M_04|A2M	A2M	ACCGTTACTCATATAGGATCCCAAGTTTAAGAGCTATGCTGGAAACAGCATAGCAAGTTTAAATAAGGCTAGTCCGTTATCAACTTGAAAAAGTGGCACCGAGTCGGTGCTTTTTT
4|sgA2ML1_1|A2ML1	AAATACTTACTGGTATCGAG	2898	1232	1568	1180	0	263	604	1061	0	6158	1979	698	1214	4900	1437	2759	3589	144568	A2ML1	A2ML1	4|sg_hA2ML1_01|A2ML1	A2ML1	ACCGAAATACTTACTGGTATCGAGGTTTAAGAGCTATGCTGGAAACAGCATAGCAAGTTTAAATAAGGCTAGTCCGTTATCAACTTGAAAAAGTGGCACCGAGTCGGTGCTTTTTT
4|sgA2ML1_2|A2ML1	ACCCTGGTTACTGATAACAA	0	563	676	718	0	1	328	610	0	0	863	497	2552	0	1108	1015	2046	144568	A2ML1	A2ML1	4|sg_hA2ML1_02|A2ML1	A2ML1	ACCGACCCTGGTTACTGATAACAAGTTTAAGAGCTATGCTGGAAACAGCATAGCAAGTTTAAATAAGGCTAGTCCGTTATCAACTTGAAAAAGTGGCACCGAGTCGGTGCTTTTTT
4|sgA2ML1_3|A2ML1	GGTGGATTATTACATCGACC	0	773	576	482	0	270	497	616	0	13	855	305	0	564	844	1252	2564	144568	A2ML1	A2ML1	4|sg_hA2ML1_03|A2ML1	A2ML1	ACCGGGTGGATTATTACATCGACCGTTTAAGAGCTATGCTGGAAACAGCATAGCAAGTTTAAATAAGGCTAGTCCGTTATCAACTTGAAAAAGTGGCACCGAGTCGGTGCTTTTTT
4|sgA2ML1_4|A2ML1	TGGTCACTACCCCTATCAAG	0	599	1204	1107	0	1364	968	558	0	1	1161	574	0	1	1656	1707	4371	144568	A2ML1	A2ML1	4|sg_hA2ML1_04|A2ML1	A2ML1	ACCGTGGTCACTACCCCTATCAAGGTTTAAGAGCTATGCTGGAAACAGCATAGCAAGTTTAAATAAGGCTAGTCCGTTATCAACTTGAAAAAGTGGCACCGAGTCGGTGCTTTTTT
4|sgA3GALT2_1|A3GALT2	AAATAATGGGAGCCCCCCAG	0	0	972	821	0	527	341	393	0	2654	1140	313	2	0	906	1049	1912	127550	A3GALT2	A3GALT2	4|sg_hA3GALT2_01|A3GALT2	A3GALT2	ACCGAAATAATGGGAGCCCCCCAGGTTTAAGAGCTATGCTGGAAACAGCATAGCAAGTTTAAATAAGGCTAGTCCGTTATCAACTTGAAAAAGTGGCACCGAGTCGGTGCTTTTTT
4|sgA3GALT2_2|A3GALT2	ACACGTAGTACATCACGCTC	0	605	697	761	0	169	852	263	0	0	1377	765	4661	8	901	600	2470	127550	A3GALT2	A3GALT2	4|sg_hA3GALT2_02|A3GALT2	A3GALT2	ACCGACACGTAGTACATCACGCTCGTTTAAGAGCTATGCTGGAAACAGCATAGCAAGTTTAAATAAGGCTAGTCCGTTATCAACTTGAAAAAGTGGCACCGAGTCGGTGCTTTTTT
4|sgA3GALT2_3|A3GALT2	AGAACATGAAGTGCGCCTCG	0	651	875	660	0	206	241	426	0	0	822	1048	0	0	498	324	2160	127550	A3GALT2	A3GALT2	4|sg_hA3GALT2_03|A3GALT2	A3GALT2	ACCGAGAACATGAAGTGCGCCTCGGTTTAAGAGCTATGCTGGAAACAGCATAGCAAGTTTAAATAAGGCTAGTCCGTTATCAACTTGAAAAAGTGGCACCGAGTCGGTGCTTTTTT
4|sgA3GALT2_4|A3GALT2	GCGCTGGCAAGACGTGTCGA	2161	0	1244	1153	320	186	789	1008	0	0	1115	985	0	1446	1107	1863	2641	127550	A3GALT2	A3GALT2	4|sg_hA3GALT2_04|A3GALT2	A3GALT2	ACCGGCGCTGGCAAGACGTGTCGAGTTTAAGAGCTATGCTGGAAACAGCATAGCAAGTTTAAATAAGGCTAGTCCGTTATCAACTTGAAAAAGTGGCACCGAGTCGGTGCTTTTTT
4|sgA4GALT_1|A4GALT	AACGTGCCAGTAGATCATGA	1798	1956	1245	659	987	645	417	556	11851	1	1185	385	0	946	1165	448	2126	53947	A4GALT	A4GALT	4|sg_hA4GALT_01|A4GALT	A4GALT	ACCGAACGTGCCAGTAGATCATGAGTTTAAGAGCTATGCTGGAAACAGCATAGCAAGTTTAAATAAGGCTAGTCCGTTATCAACTTGAAAAAGTGGCACCGAGTCGGTGCTTTTTT
4|sgA4GALT_2|A4GALT	AGGCCAGGAACGCGCCGTTG	3467	1642	790	1055	2640	237	1117	602	0	3217	1734	399	0	0	772	1204	2866	53947	A4GALT	A4GALT	4|sg_hA4GALT_02|A4GALT	A4GALT	ACCGAGGCCAGGAACGCGCCGTTGGTTTAAGAGCTATGCTGGAAACAGCATAGCAAGTTTAAATAAGGCTAGTCCGTTATCAACTTGAAAAAGTGGCACCGAGTCGGTGCTTTTTT
4|sgA4GALT_3|A4GALT	CCACATGAGTGCGATCCTGG	5814	1076	1236	1426	1073	979	1405	664	0	0	1530	1134	0	0	1086	1739	4580	53947	A4GALT	A4GALT	4|sg_hA4GALT_03|A4GALT	A4GALT	ACCGCCACATGAGTGCGATCCTGGGTTTAAGAGCTATGCTGGAAACAGCATAGCAAGTTTAAATAAGGCTAGTCCGTTATCAACTTGAAAAAGTGGCACCGAGTCGGTGCTTTTTT
4|sgA4GALT_4|A4GALT	GCCGCGTACCAGTCGGCCAG	0	1399	840	811	2	1859	998	884	0	3072	822	679	3146	1850	845	384	2129	53947	A4GALT	A4GALT	4|sg_hA4GALT_04|A4GALT	A4GALT	ACCGGCCGCGTACCAGTCGGCCAGGTTTAAGAGCTATGCTGGAAACAGCATAGCAAGTTTAAATAAGGCTAGTCCGTTATCAACTTGAAAAAGTGGCACCGAGTCGGTGCTTTTTT
4|sgA4GNT_1|A4GNT	CAGCCAAAAAGTTCTCCTCA	0	2374	1356	1253	3945	125	1069	880	0	77	1769	954	2	8	1019	1173	3254	51146	A4GNT	A4GNT	4|sg_hA4GNT_01|A4GNT	A4GNT	ACCGCAGCCAAAAAGTTCTCCTCAGTTTAAGAGCTATGCTGGAAACAGCATAGCAAGTTTAAATAAGGCTAGTCCGTTATCAACTTGAAAAAGTGGCACCGAGTCGGTGCTTTTTT
4|sgA4GNT_2|A4GNT	CAGCTCGGATGCATCCCGCC	0	723	1287	615	68	270	480	969	0	0	1034	904	6390	133	967	856	2801	51146	A4GNT	A4GNT	4|sg_hA4GNT_02|A4GNT	A4GNT	ACCGCAGCTCGGATGCATCCCGCCGTTTAAGAGCTATGCTGGAAACAGCATAGCAAGTTTAAATAAGGCTAGTCCGTTATCAACTTGAAAAAGTGGCACCGAGTCGGTGCTTTTTT
4|sgA4GNT_3|A4GNT	TGCATTCCCACAAAAAGGGG	4432	1430	1411	1539	1	537	521	1250	137	1	1935	1284	4633	1753	3312	2009	4757	51146	A4GNT	A4GNT	4|sg_hA4GNT_03|A4GNT	A4GNT	ACCGTGCATTCCCACAAAAAGGGGGTTTAAGAGCTATGCTGGAAACAGCATAGCAAGTTTAAATAAGGCTAGTCCGTTATCAACTTGAAAAAGTGGCACCGAGTCGGTGCTTTTTT
4|sgA4GNT_4|A4GNT	GTAGCGCCTCCACTCTCGAT	0	2	2059	1359	2843	755	893	1369	0	3382	1770	1463	0	2247	1698	793	5471	51146	A4GNT	A4GNT	4|sg_hA4GNT_04|A4GNT	A4GNT	ACCGGTAGCGCCTCCACTCTCGATGTTTAAGAGCTATGCTGGAAACAGCATAGCAAGTTTAAATAAGGCTAGTCCGTTATCAACTTGAAAAAGTGGCACCGAGTCGGTGCTTTTTT
4|sgAAAS_1|AAAS	CCCAGGGTGAGACAGCACTT	0	1939	1461	1145	0	856	451	730	0	2073	2052	742	1	1076	1500	2471	3526	8086	AAAS	AAAS	4|sg_hAAAS_01|AAAS	AAAS	ACCGCCCAGGGTGAGACAGCACTTGTTTAAGAGCTATGCTGGAAACAGCATAGCAAGTTTAAATAAGGCTAGTCCGTTATCAACTTGAAAAAGTGGCACCGAGTCGGTGCTTTTTT
4|sgAAAS_2|AAAS	GCCAAGACAGAGGCACTAAG	1844	1002	1174	1304	0	241	811	959	0	860	944	789	1	0	840	2402	2621	8086	AAAS	AAAS	4|sg_hAAAS_02|AAAS	AAAS	ACCGGCCAAGACAGAGGCACTAAGGTTTAAGAGCTATGCTGGAAACAGCATAGCAAGTTTAAATAAGGCTAGTCCGTTATCAACTTGAAAAAGTGGCACCGAGTCGGTGCTTTTTT
4|sgAAAS_3|AAAS	GGCCCATCGACAGAGTGCCA	0	1847	856	798	1	500	0	321	0	0	735	297	0	1055	717	460	2367	8086	AAAS	AAAS	4|sg_hAAAS_03|AAAS	AAAS	ACCGGGCCCATCGACAGAGTGCCAGTTTAAGAGCTATGCTGGAAACAGCATAGCAAGTTTAAATAAGGCTAGTCCGTTATCAACTTGAAAAAGTGGCACCGAGTCGGTGCTTTTTT
4|sgAAAS_4|AAAS	TGACAGCGCCCTGATAGAGT	0	1006	644	420	2	0	405	434	0	0	668	635	0	4	371	944	1839	8086	AAAS	AAAS	4|sg_hAAAS_04|AAAS	AAAS	ACCGTGACAGCGCCCTGATAGAGTGTTTAAGAGCTATGCTGGAAACAGCATAGCAAGTTTAAATAAGGCTAGTCCGTTATCAACTTGAAAAAGTGGCACCGAGTCGGTGCTTTTTT
4|sgAACS_1|AACS	AGAGCTACGAGTATGTCTAC	1624	1	400	619	1	347	417	428	0	2021	1127	400	932	1428	998	939	2259	65985	AACS	AACS	4|sg_hAACS_01|AACS	AACS	ACCGAGAGCTACGAGTATGTCTACGTTTAAGAGCTATGCTGGAAACAGCATAGCAAGTTTAAATAAGGCTAGTCCGTTATCAACTTGAAAAAGTGGCACCGAGTCGGTGCTTTTTT
4|sgAACS_2|AACS	CACATTCACACCGAAGTCCG	3032	1167	2072	1969	4	1122	1665	1853	0	1919	2927	1731	4237	1560	1778	2832	6033	65985	AACS	AACS	4|sg_hAACS_02|AACS	AACS	ACCGCACATTCACACCGAAGTCCGGTTTAAGAGCTATGCTGGAAACAGCATAGCAAGTTTAAATAAGGCTAGTCCGTTATCAACTTGAAAAAGTGGCACCGAGTCGGTGCTTTTTT
4|sgAACS_3|AACS	CATCCTCCTGTGCTACACCA	0	894	1227	669	1	1343	475	581	0	3095	757	702	1	0	1116	1931	2485	65985	AACS	AACS	4|sg_hAACS_03|AACS	AACS	ACCGCATCCTCCTGTGCTACACCAGTTTAAGAGCTATGCTGGAAACAGCATAGCAAGTTTAAATAAGGCTAGTCCGTTATCAACTTGAAAAAGTGGCACCGAGTCGGTGCTTTTTT
4|sgAACS_4|AACS	CTTCTCACGTGTGTATGATG	5851	1109	2090	1388	4	1092	831	1541	0	1	2611	1181	907	2924	2369	2927	6555	65985	AACS	AACS	4|sg_hAACS_04|AACS	AACS	ACCGCTTCTCACGTGTGTATGATGGTTTAAGAGCTATGCTGGAAACAGCATAGCAAGTTTAAATAAGGCTAGTCCGTTATCAACTTGAAAAAGTGGCACCGAGTCGGTGCTTTTTT
4|sgAADAC_1|AADAC	AAGTCTGAAGCACTAAGAAG	0	1263	912	743	0	648	542	796	31037	4	578	687	2	0	905	2390	2156	13	AADAC	AADAC	4|sg_hAADAC_01|AADAC	AADAC	ACCGAAGTCTGAAGCACTAAGAAGGTTTAAGAGCTATGCTGGAAACAGCATAGCAAGTTTAAATAAGGCTAGTCCGTTATCAACTTGAAAAAGTGGCACCGAGTCGGTGCTTTTTT
4|sgAADAC_2|AADAC	ATGTATATAATGCCTTAAGG	0	599	419	393	0	521	587	491	1	3090	1317	456	1	0	1021	522	2014	13	AADAC	AADAC	4|sg_hAADAC_02|AADAC	AADAC	ACCGATGTATATAATGCCTTAAGGGTTTAAGAGCTATGCTGGAAACAGCATAGCAAGTTTAAATAAGGCTAGTCCGTTATCAACTTGAAAAAGTGGCACCGAGTCGGTGCTTTTTT
4|sgAADAC_3|AADAC	ATTTCTATCCAAATCACTCA	0	0	815	880	1799	521	453	467	0	1	1237	367	0	1126	821	501	1657	13	AADAC	AADAC	4|sg_hAADAC_03|AADAC	AADAC	ACCGATTTCTATCCAAATCACTCAGTTTAAGAGCTATGCTGGAAACAGCATAGCAAGTTTAAATAAGGCTAGTCCGTTATCAACTTGAAAAAGTGGCACCGAGTCGGTGCTTTTTT
4|sgAADAC_4|AADAC	GGTATTTCTGGAGATAGTGC	0	3	371	379	1	0	305	654	0	2128	924	658	0	1	388	921	2402	13	AADAC	AADAC	4|sg_hAADAC_04|AADAC	AADAC	ACCGGGTATTTCTGGAGATAGTGCGTTTAAGAGCTATGCTGGAAACAGCATAGCAAGTTTAAATAAGGCTAGTCCGTTATCAACTTGAAAAAGTGGCACCGAGTCGGTGCTTTTTT
4|sgAADACL2_1|AADACL2	AAAGAAAGTCAGAAACCCGA	0	1286	1349	1481	1942	586	1054	1210	0	1	1913	1431	1	2282	1863	2094	4254	344752	AADACL2	AADACL2	4|sg_hAADACL2_01|AADACL2	AADACL2	ACCGAAAGAAAGTCAGAAACCCGAGTTTAAGAGCTATGCTGGAAACAGCATAGCAAGTTTAAATAAGGCTAGTCCGTTATCAACTTGAAAAAGTGGCACCGAGTCGGTGCTTTTTT
4|sgAADACL2_2|AADACL2	GAAAAAATTTGACTGCAGCA	0	1480	832	705	2	0	1039	659	0	1431	863	520	0	0	1174	1167	1904	344752	AADACL2	AADACL2	4|sg_hAADACL2_02|AADACL2	AADACL2	ACCGGAAAAAATTTGACTGCAGCAGTTTAAGAGCTATGCTGGAAACAGCATAGCAAGTTTAAATAAGGCTAGTCCGTTATCAACTTGAAAAAGTGGCACCGAGTCGGTGCTTTTTT
4|sgAADACL2_3|AADACL2	GTGATGTATTCATCTGAAAG	1	1352	1793	1169	3474	78	1400	894	0	0	1239	746	2549	0	2143	1266	3803	344752	AADACL2	AADACL2	4|sg_hAADACL2_03|AADACL2	AADACL2	ACCGGTGATGTATTCATCTGAAAGGTTTAAGAGCTATGCTGGAAACAGCATAGCAAGTTTAAATAAGGCTAGTCCGTTATCAACTTGAAAAAGTGGCACCGAGTCGGTGCTTTTTT
4|sgAADACL2_4|AADACL2	TGGGGGCAATTTAGCAACAG	0	1028	676	581	1	6	406	253	0	0	533	637	0	0	1165	1091	1517	344752	AADACL2	AADACL2	4|sg_hAADACL2_04|AADACL2	AADACL2	ACCGTGGGGGCAATTTAGCAACAGGTTTAAGAGCTATGCTGGAAACAGCATAGCAAGTTTAAATAAGGCTAGTCCGTTATCAACTTGAAAAAGTGGCACCGAGTCGGTGCTTTTTT
4|sgAADACL3_1|AADACL3	ACTTATGCTTAGGTAACTTG	1651	1825	993	1178	1212	510	734	1051	0	1679	1788	601	1	944	957	2200	2773	126767	AADACL3	AADACL3	4|sg_hAADACL3_01|AADACL3	AADACL3	ACCGACTTATGCTTAGGTAACTTGGTTTAAGAGCTATGCTGGAAACAGCATAGCAAGTTTAAATAAGGCTAGTCCGTTATCAACTTGAAAAAGTGGCACCGAGTCGGTGCTTTTTT
4|sgAADACL3_2|AADACL3	CTGCGGTGACAGTTTCGGAG	1859	3546	1764	1555	5314	784	233	776	0	1724	1389	1052	1	4394	1594	1257	4171	126767	AADACL3	AADACL3	4|sg_hAADACL3_02|AADACL3	AADACL3	ACCGCTGCGGTGACAGTTTCGGAGGTTTAAGAGCTATGCTGGAAACAGCATAGCAAGTTTAAATAAGGCTAGTCCGTTATCAACTTGAAAAAGTGGCACCGAGTCGGTGCTTTTTT
4|sgAADACL3_3|AADACL3	GGCATCGTGTACTACCACGG	1847	1584	1815	921	1101	1184	1199	1176	0	0	1268	867	818	0	1725	1754	4436	126767	AADACL3	AADACL3	4|sg_hAADACL3_03|AADACL3	AADACL3	ACCGGGCATCGTGTACTACCACGGGTTTAAGAGCTATGCTGGAAACAGCATAGCAAGTTTAAATAAGGCTAGTCCGTTATCAACTTGAAAAAGTGGCACCGAGTCGGTGCTTTTTT
4|sgAADACL3_4|AADACL3	TCGGGGTCATACTTTAGCGG	3099	188	687	627	0	235	600	383	0	0	1045	307	586	0	483	667	2424	126767	AADACL3	AADACL3	4|sg_hAADACL3_04|AADACL3	AADACL3	ACCGTCGGGGTCATACTTTAGCGGGTTTAAGAGCTATGCTGGAAACAGCATAGCAAGTTTAAATAAGGCTAGTCCGTTATCAACTTGAAAAAGTGGCACCGAGTCGGTGCTTTTTT
4|sgAADACL4_1|AADACL4	CAAGGTAGCAGGGATATCCG	1806	2581	1439	1277	301	973	606	676	1	2519	2162	1073	5918	1397	2960	2746	5808	343066	AADACL4	AADACL4	4|sg_hAADACL4_01|AADACL4	AADACL4	ACCGCAAGGTAGCAGGGATATCCGGTTTAAGAGCTATGCTGGAAACAGCATAGCAAGTTTAAATAAGGCTAGTCCGTTATCAACTTGAAAAAGTGGCACCGAGTCGGTGCTTTTTT
4|sgAADACL4_2|AADACL4	GTAAACTCACCAAAGTGACC	0	505	460	488	1	484	356	274	0	0	395	189	0	0	576	461	1784	343066	AADACL4	AADACL4	4|sg_hAADACL4_02|AADACL4	AADACL4	ACCGGTAAACTCACCAAAGTGACCGTTTAAGAGCTATGCTGGAAACAGCATAGCAAGTTTAAATAAGGCTAGTCCGTTATCAACTTGAAAAAGTGGCACCGAGTCGGTGCTTTTTT
4|sgAADACL4_3|AADACL4	TAGAAGATGATGCCTCGCCG	0	497	2068	2241	2	958	1492	1526	0	0	1945	704	3509	1992	1929	2139	6086	343066	AADACL4	AADACL4	4|sg_hAADACL4_03|AADACL4	AADACL4	ACCGTAGAAGATGATGCCTCGCCGGTTTAAGAGCTATGCTGGAAACAGCATAGCAAGTTTAAATAAGGCTAGTCCGTTATCAACTTGAAAAAGTGGCACCGAGTCGGTGCTTTTTT
4|sgAADACL4_4|AADACL4	TATCGTCCCAAAACGCAGGT	0	0	644	515	0	0	689	220	0	0	761	449	2857	3	586	619	1794	343066	AADACL4	AADACL4	4|sg_hAADACL4_04|AADACL4	AADACL4	ACCGTATCGTCCCAAAACGCAGGTGTTTAAGAGCTATGCTGGAAACAGCATAGCAAGTTTAAATAAGGCTAGTCCGTTATCAACTTGAAAAAGTGGCACCGAGTCGGTGCTTTTTT
4|sgAADAT_1|AADAT	AGATCCATTTGTCCTTGACT	2170	1353	867	798	1421	1336	767	818	0	0	873	472	1488	2	1001	758	2262	51166	AADAT	AADAT	4|sg_hAADAT_01|AADAT	AADAT	ACCGAGATCCATTTGTCCTTGACTGTTTAAGAGCTATGCTGGAAACAGCATAGCAAGTTTAAATAAGGCTAGTCCGTTATCAACTTGAAAAAGTGGCACCGAGTCGGTGCTTTTTT
4|sgAADAT_2|AADAT	ATTGATACTTACCCAGCACT	0	1158	1509	1009	1	996	1444	1215	0	2929	587	486	2404	5300	782	1565	3405	51166	AADAT	AADAT	4|sg_hAADAT_02|AADAT	AADAT	ACCGATTGATACTTACCCAGCACTGTTTAAGAGCTATGCTGGAAACAGCATAGCAAGTTTAAATAAGGCTAGTCCGTTATCAACTTGAAAAAGTGGCACCGAGTCGGTGCTTTTTT
4|sgAADAT_3|AADAT	GTAGCTGACATATTGAGCAG	1	512	1776	1017	1	212	20	760	0	0	746	721	1	2075	1184	1905	3045	51166	AADAT	AADAT	4|sg_hAADAT_03|AADAT	AADAT	ACCGGTAGCTGACATATTGAGCAGGTTTAAGAGCTATGCTGGAAACAGCATAGCAAGTTTAAATAAGGCTAGTCCGTTATCAACTTGAAAAAGTGGCACCGAGTCGGTGCTTTTTT
4|sgAADAT_4|AADAT	TAATAATGTTGCAGCCCAGT	0	1511	1032	894	0	198	1035	676	0	494	693	611	0	0	823	895	2798	51166	AADAT	AADAT	4|sg_hAADAT_04|AADAT	AADAT	ACCGTAATAATGTTGCAGCCCAGTGTTTAAGAGCTATGCTGGAAACAGCATAGCAAGTTTAAATAAGGCTAGTCCGTTATCAACTTGAAAAAGTGGCACCGAGTCGGTGCTTTTTT
4|sgAAED1_1|AAED1	CATCTGCAAGGAATACGTAG	0	503	479	450	1	342	1207	299	1	6121	921	540	64	328	672	922	2675	195827	AAED1	AAED1	4|sg_hPRXL2C_01|PRXL2C	PRXL2C	ACCGCATCTGCAAGGAATACGTAGGTTTAAGAGCTATGCTGGAAACAGCATAGCAAGTTTAAATAAGGCTAGTCCGTTATCAACTTGAAAAAGTGGCACCGAGTCGGTGCTTTTTT
4|sgAAED1_2|AAED1	GACATGTTATGTCTTACCTG	0	2940	904	772	1	0	909	622	12289	0	1231	632	1	0	961	1344	4931	195827	AAED1	AAED1	4|sg_hPRXL2C_02|PRXL2C	PRXL2C	ACCGGACATGTTATGTCTTACCTGGTTTAAGAGCTATGCTGGAAACAGCATAGCAAGTTTAAATAAGGCTAGTCCGTTATCAACTTGAAAAAGTGGCACCGAGTCGGTGCTTTTTT
4|sgAAED1_3|AAED1	GTCATCCTACCATCATATTG	0	1679	1096	1226	1658	900	322	719	0	3329	1165	473	3319	1376	1384	2082	3267	195827	AAED1	AAED1	4|sg_hPRXL2C_03|PRXL2C	PRXL2C	ACCGGTCATCCTACCATCATATTGGTTTAAGAGCTATGCTGGAAACAGCATAGCAAGTTTAAATAAGGCTAGTCCGTTATCAACTTGAAAAAGTGGCACCGAGTCGGTGCTTTTTT
4|sgAAED1_4|AAED1	TCCCGGAACAGCGCGCCGAA	0	1370	1066	1120	1	520	1127	671	0	2	1399	509	1415	2471	928	659	3029	195827	AAED1	AAED1	4|sg_hPRXL2C_04|PRXL2C	PRXL2C	ACCGTCCCGGAACAGCGCGCCGAAGTTTAAGAGCTATGCTGGAAACAGCATAGCAAGTTTAAATAAGGCTAGTCCGTTATCAACTTGAAAAAGTGGCACCGAGTCGGTGCTTTTTT
4|sgAAGAB_1|AAGAB	AGCAGACATCAATCTATGTG	0	0	891	492	1	605	782	627	0	908	880	317	0	1715	789	341	2262	79719	AAGAB	AAGAB	4|sg_hAAGAB_01|AAGAB	AAGAB	ACCGAGCAGACATCAATCTATGTGGTTTAAGAGCTATGCTGGAAACAGCATAGCAAGTTTAAATAAGGCTAGTCCGTTATCAACTTGAAAAAGTGGCACCGAGTCGGTGCTTTTTT
4|sgAAGAB_2|AAGAB	CAAGAATGGTGCATCAAACA	1987	1039	872	1300	0	0	782	907	0	0	681	389	1419	249	1668	1310	2985	79719	AAGAB	AAGAB	4|sg_hAAGAB_02|AAGAB	AAGAB	ACCGCAAGAATGGTGCATCAAACAGTTTAAGAGCTATGCTGGAAACAGCATAGCAAGTTTAAATAAGGCTAGTCCGTTATCAACTTGAAAAAGTGGCACCGAGTCGGTGCTTTTTT
4|sgAAGAB_3|AAGAB	CACTACATTGGACCACACAT	2369	2563	1466	1186	0	210	1160	772	0	0	1463	928	0	1739	1173	2059	3201	79719	AAGAB	AAGAB	4|sg_hAAGAB_03|AAGAB	AAGAB	ACCGCACTACATTGGACCACACATGTTTAAGAGCTATGCTGGAAACAGCATAGCAAGTTTAAATAAGGCTAGTCCGTTATCAACTTGAAAAAGTGGCACCGAGTCGGTGCTTTTTT
4|sgAAGAB_4|AAGAB	GCCATGAGGAGACACTATCA	15	3978	927	919	2885	471	342	540	0	0	693	752	0	0	717	1207	2724	79719	AAGAB	AAGAB	4|sg_hAAGAB_04|AAGAB	AAGAB	ACCGGCCATGAGGAGACACTATCAGTTTAAGAGCTATGCTGGAAACAGCATAGCAAGTTTAAATAAGGCTAGTCCGTTATCAACTTGAAAAAGTGGCACCGAGTCGGTGCTTTTTT
4|sgAAK1_1|AAK1	CAAAACTCCTATTATCCACC	0	4	484	346	1766	1	845	409	0	2517	406	193	1	1034	549	667	1860	22848	AAK1	AAK1	4|sg_hAAK1_01|AAK1	AAK1	ACCGCAAAACTCCTATTATCCACCGTTTAAGAGCTATGCTGGAAACAGCATAGCAAGTTTAAATAAGGCTAGTCCGTTATCAACTTGAAAAAGTGGCACCGAGTCGGTGCTTTTTT
4|sgAAK1_2|AAK1	CAAAAGGCCGGATATTTACC	0	0	419	407	0	525	200	529	1	0	535	278	0	31	504	488	2427	22848	AAK1	AAK1	4|sg_hAAK1_02|AAK1	AAK1	ACCGCAAAAGGCCGGATATTTACCGTTTAAGAGCTATGCTGGAAACAGCATAGCAAGTTTAAATAAGGCTAGTCCGTTATCAACTTGAAAAAGTGGCACCGAGTCGGTGCTTTTTT
4|sgAAK1_3|AAK1	GGGTGCAATTGAAGTCTCTG	0	821	717	1069	1601	496	548	873	0	0	1619	554	1403	287	849	786	2959	22848	AAK1	AAK1	4|sg_hAAK1_03|AAK1	AAK1	ACCGGGGTGCAATTGAAGTCTCTGGTTTAAGAGCTATGCTGGAAACAGCATAGCAAGTTTAAATAAGGCTAGTCCGTTATCAACTTGAAAAAGTGGCACCGAGTCGGTGCTTTTTT
4|sgAAK1_4|AAK1	TGGCAAAATCATCACTACGA	0	694	556	299	1	6	362	749	0	0	660	575	2	3155	944	1734	2119	22848	AAK1	AAK1	4|sg_hAAK1_04|AAK1	AAK1	ACCGTGGCAAAATCATCACTACGAGTTTAAGAGCTATGCTGGAAACAGCATAGCAAGTTTAAATAAGGCTAGTCCGTTATCAACTTGAAAAAGTGGCACCGAGTCGGTGCTTTTTT
4|sgAAMDC_1|AAMDC	AAATTGCTTCCTTATCATGG	0	0	1128	636	1991	702	345	761	0	3307	544	632	3032	1589	485	1622	2725	28971	AAMDC	AAMDC	4|sg_hAAMDC_01|AAMDC	AAMDC	ACCGAAATTGCTTCCTTATCATGGGTTTAAGAGCTATGCTGGAAACAGCATAGCAAGTTTAAATAAGGCTAGTCCGTTATCAACTTGAAAAAGTGGCACCGAGTCGGTGCTTTTTT
4|sgAAMDC_2|AAMDC	AAGTATGGCCAGGGGGTAGT	3386	766	1313	1178	0	752	1212	534	0	0	1874	1030	2859	1	1280	2917	3694	28971	AAMDC	AAMDC	4|sg_hAAMDC_02|AAMDC	AAMDC	ACCGAAGTATGGCCAGGGGGTAGTGTTTAAGAGCTATGCTGGAAACAGCATAGCAAGTTTAAATAAGGCTAGTCCGTTATCAACTTGAAAAAGTGGCACCGAGTCGGTGCTTTTTT
4|sgAAMDC_3|AAMDC	AGGTACTCCACAGTTGATGA	5639	1361	1537	1189	0	266	190	763	0	0	1282	657	4602	1	1362	1555	2905	28971	AAMDC	AAMDC	4|sg_hAAMDC_03|AAMDC	AAMDC	ACCGAGGTACTCCACAGTTGATGAGTTTAAGAGCTATGCTGGAAACAGCATAGCAAGTTTAAATAAGGCTAGTCCGTTATCAACTTGAAAAAGTGGCACCGAGTCGGTGCTTTTTT
4|sgAAMDC_4|AAMDC	GATTGGCCGAGGGATGAGTG	0	797	1032	682	0	551	575	612	20	2300	2085	741	0	1407	790	1565	2681	28971	AAMDC	AAMDC	4|sg_hAAMDC_04|AAMDC	AAMDC	ACCGGATTGGCCGAGGGATGAGTGGTTTAAGAGCTATGCTGGAAACAGCATAGCAAGTTTAAATAAGGCTAGTCCGTTATCAACTTGAAAAAGTGGCACCGAGTCGGTGCTTTTTT
4|sgAAMP_1|AAMP	AAGATGACAAAGCCTTCGTA	0	0	507	365	0	0	83	125	0	0	194	125	2468	1	453	278	2543	14	AAMP	AAMP	4|sg_hAAMP_01|AAMP	AAMP	ACCGAAGATGACAAAGCCTTCGTAGTTTAAGAGCTATGCTGGAAACAGCATAGCAAGTTTAAATAAGGCTAGTCCGTTATCAACTTGAAAAAGTGGCACCGAGTCGGTGCTTTTTT
4|sgAAMP_2|AAMP	AGGTGACCTCGCTATCGTCG	2516	821	1164	837	1753	766	543	523	0	0	1476	581	2	453	1073	1750	3251	14	AAMP	AAMP	4|sg_hAAMP_02|AAMP	AAMP	ACCGAGGTGACCTCGCTATCGTCGGTTTAAGAGCTATGCTGGAAACAGCATAGCAAGTTTAAATAAGGCTAGTCCGTTATCAACTTGAAAAAGTGGCACCGAGTCGGTGCTTTTTT
4|sgAAMP_3|AAMP	TGAGTGGCCTCTTGAAAGTG	0	0	405	304	1188	232	99	334	0	0	611	405	5471	4	284	199	3741	14	AAMP	AAMP	4|sg_hAAMP_03|AAMP	AAMP	ACCGTGAGTGGCCTCTTGAAAGTGGTTTAAGAGCTATGCTGGAAACAGCATAGCAAGTTTAAATAAGGCTAGTCCGTTATCAACTTGAAAAAGTGGCACCGAGTCGGTGCTTTTTT
4|sgAAMP_4|AAMP	TGGATGTGGAAAGTCCCGAA	2011	861	383	134	1605	418	304	450	0	0	376	140	0	0	323	185	2055	14	AAMP	AAMP	4|sg_hAAMP_04|AAMP	AAMP	ACCGTGGATGTGGAAAGTCCCGAAGTTTAAGAGCTATGCTGGAAACAGCATAGCAAGTTTAAATAAGGCTAGTCCGTTATCAACTTGAAAAAGTGGCACCGAGTCGGTGCTTTTTT
4|sgAANAT_1|AANAT	ACCTTCACGCTCGATCTCAA	4515	684	1163	1266	2	2215	793	1357	10829	1050	1867	995	1	0	2478	1598	4242	15	AANAT	AANAT	4|sg_hAANAT_01|AANAT	AANAT	ACCGACCTTCACGCTCGATCTCAAGTTTAAGAGCTATGCTGGAAACAGCATAGCAAGTTTAAATAAGGCTAGTCCGTTATCAACTTGAAAAAGTGGCACCGAGTCGGTGCTTTTTT
4|sgAANAT_2|AANAT	GCCCTCCTCGAACCAGCCCA	0	911	1103	957	1	944	1138	1156	8649	3375	826	988	6574	6	1220	1572	4263	15	AANAT	AANAT	4|sg_hAANAT_02|AANAT	AANAT	ACCGGCCCTCCTCGAACCAGCCCAGTTTAAGAGCTATGCTGGAAACAGCATAGCAAGTTTAAATAAGGCTAGTCCGTTATCAACTTGAAAAAGTGGCACCGAGTCGGTGCTTTTTT
4|sgAANAT_3|AANAT	GGTGAGGCAGCGAAACTCAC	1757	2857	3027	1931	4869	1613	1866	2309	0	0	2927	1574	2	3232	2502	3154	6330	15	AANAT	AANAT	4|sg_hAANAT_03|AANAT	AANAT	ACCGGGTGAGGCAGCGAAACTCACGTTTAAGAGCTATGCTGGAAACAGCATAGCAAGTTTAAATAAGGCTAGTCCGTTATCAACTTGAAAAAGTGGCACCGAGTCGGTGCTTTTTT
4|sgAANAT_4|AANAT	GTGGCGCCGCTGACAGCTCG	0	442	1016	917	1324	475	562	732	0	0	1091	477	1	0	1234	1287	2132	15	AANAT	AANAT	4|sg_hAANAT_04|AANAT	AANAT	ACCGGTGGCGCCGCTGACAGCTCGGTTTAAGAGCTATGCTGGAAACAGCATAGCAAGTTTAAATAAGGCTAGTCCGTTATCAACTTGAAAAAGTGGCACCGAGTCGGTGCTTTTTT
4|sgAAR2_1|AAR2	CATGTTCAGGATGACCACAG	0	3244	1238	1280	1219	720	1078	1368	3501	0	1585	852	2653	2219	978	2415	3593	25980	AAR2	AAR2	4|sg_hAAR2_01|AAR2	AAR2	ACCGCATGTTCAGGATGACCACAGGTTTAAGAGCTATGCTGGAAACAGCATAGCAAGTTTAAATAAGGCTAGTCCGTTATCAACTTGAAAAAGTGGCACCGAGTCGGTGCTTTTTT
4|sgAAR2_2|AAR2	CTTGGTTATCTCAGCTGGCG	2056	2215	1385	821	999	276	813	874	1	0	1881	571	1636	1583	1465	1348	3764	25980	AAR2	AAR2	4|sg_hAAR2_02|AAR2	AAR2	ACCGCTTGGTTATCTCAGCTGGCGGTTTAAGAGCTATGCTGGAAACAGCATAGCAAGTTTAAATAAGGCTAGTCCGTTATCAACTTGAAAAAGTGGCACCGAGTCGGTGCTTTTTT
4|sgAAR2_3|AAR2	GGGGTAGATTCTGCCCCACG	0	198	751	493	1347	282	366	762	0	0	1185	744	2	849	513	1287	2097	25980	AAR2	AAR2	4|sg_hAAR2_03|AAR2	AAR2	ACCGGGGGTAGATTCTGCCCCACGGTTTAAGAGCTATGCTGGAAACAGCATAGCAAGTTTAAATAAGGCTAGTCCGTTATCAACTTGAAAAAGTGGCACCGAGTCGGTGCTTTTTT
4|sgAAR2_4|AAR2	TAAGGAAGAAACCCATACGA	5	2845	1273	866	16	1	522	590	0	0	1081	740	1957	3533	1054	2527	4514	25980	AAR2	AAR2	4|sg_hAAR2_04|AAR2	AAR2	ACCGTAAGGAAGAAACCCATACGAGTTTAAGAGCTATGCTGGAAACAGCATAGCAAGTTTAAATAAGGCTAGTCCGTTATCAACTTGAAAAAGTGGCACCGAGTCGGTGCTTTTTT
4|sgAARD_1|AARD	GCAGAGCTGGACGGGCGTTG	2301	1869	2411	2265	4	1836	1460	1356	1	1581	2732	1815	3	7208	3267	4847	6613	441376	AARD	AARD	4|sg_hAARD_01|AARD	AARD	ACCGGCAGAGCTGGACGGGCGTTGGTTTAAGAGCTATGCTGGAAACAGCATAGCAAGTTTAAATAAGGCTAGTCCGTTATCAACTTGAAAAAGTGGCACCGAGTCGGTGCTTTTTT
4|sgAARD_2|AARD	GGGAAATTCTCTCTCTGCAG	0	468	792	558	1	0	303	379	0	0	528	343	0	0	727	547	1863	441376	AARD	AARD	4|sg_hAARD_02|AARD	AARD	ACCGGGGAAATTCTCTCTCTGCAGGTTTAAGAGCTATGCTGGAAACAGCATAGCAAGTTTAAATAAGGCTAGTCCGTTATCAACTTGAAAAAGTGGCACCGAGTCGGTGCTTTTTT
4|sgAARD_3|AARD	GTCCCCGAAGAAGTCGCACG	1824	226	908	637	3	445	420	880	0	2082	1760	872	1555	1	1142	1355	2801	441376	AARD	AARD	4|sg_hAARD_03|AARD	AARD	ACCGGTCCCCGAAGAAGTCGCACGGTTTAAGAGCTATGCTGGAAACAGCATAGCAAGTTTAAATAAGGCTAGTCCGTTATCAACTTGAAAAAGTGGCACCGAGTCGGTGCTTTTTT
4|sgAARD_4|AARD	TGCTGGAGGACCTCAGACGA	0	0	1039	694	1245	5	713	835	0	1011	1490	736	0	0	862	569	2714	441376	AARD	AARD	4|sg_hAARD_04|AARD	AARD	ACCGTGCTGGAGGACCTCAGACGAGTTTAAGAGCTATGCTGGAAACAGCATAGCAAGTTTAAATAAGGCTAGTCCGTTATCAACTTGAAAAAGTGGCACCGAGTCGGTGCTTTTTT
4|sgAARS_1|AARS	CCAAGAAAAGCATTGACACA	3094	1	574	368	0	1206	17	374	0	0	322	61	0	0	150	422	2511	16	AARS	AARS	4|sg_hAARS1_01|AARS1	AARS1	ACCGCCAAGAAAAGCATTGACACAGTTTAAGAGCTATGCTGGAAACAGCATAGCAAGTTTAAATAAGGCTAGTCCGTTATCAACTTGAAAAAGTGGCACCGAGTCGGTGCTTTTTT
4|sgAARS_2|AARS	GGAGGCCAGATCTATGACGA	0	0	342	57	1	0	9	228	0	0	327	335	0	1031	306	628	2454	16	AARS	AARS	4|sg_hAARS1_02|AARS1	AARS1	ACCGGGAGGCCAGATCTATGACGAGTTTAAGAGCTATGCTGGAAACAGCATAGCAAGTTTAAATAAGGCTAGTCCGTTATCAACTTGAAAAAGTGGCACCGAGTCGGTGCTTTTTT
4|sgAARS_3|AARS	TCAGAATGTGCGTAGCTGTG	0	0	165	196	0	0	173	20	0	0	233	312	1796	1	298	437	2336	16	AARS	AARS	4|sg_hAARS1_03|AARS1	AARS1	ACCGTCAGAATGTGCGTAGCTGTGGTTTAAGAGCTATGCTGGAAACAGCATAGCAAGTTTAAATAAGGCTAGTCCGTTATCAACTTGAAAAAGTGGCACCGAGTCGGTGCTTTTTT
4|sgAARS_4|AARS	TTGGTGCTGAGGATGCCGAT	0	2841	625	594	0	42	879	425	0	0	1264	802	2	679	954	1381	4417	16	AARS	AARS	4|sg_hAARS1_04|AARS1	AARS1	ACCGTTGGTGCTGAGGATGCCGATGTTTAAGAGCTATGCTGGAAACAGCATAGCAAGTTTAAATAAGGCTAGTCCGTTATCAACTTGAAAAAGTGGCACCGAGTCGGTGCTTTTTT
4|sgAARS2_1|AARS2	AGCAAACTGGGGTCGCCGCG	0	2923	1366	687	1359	966	952	826	0	1851	2586	597	0	1	1360	1328	7122	57505	AARS2	AARS2	4|sg_hAARS2_01|AARS2	AARS2	ACCGAGCAAACTGGGGTCGCCGCGGTTTAAGAGCTATGCTGGAAACAGCATAGCAAGTTTAAATAAGGCTAGTCCGTTATCAACTTGAAAAAGTGGCACCGAGTCGGTGCTTTTTT
4|sgAARS2_2|AARS2	CCAACTTCTACGCAGAACAG	0	1214	374	291	5009	0	728	219	0	0	770	177	0	2094	683	22	2430	57505	AARS2	AARS2	4|sg_hAARS2_02|AARS2	AARS2	ACCGCCAACTTCTACGCAGAACAGGTTTAAGAGCTATGCTGGAAACAGCATAGCAAGTTTAAATAAGGCTAGTCCGTTATCAACTTGAAAAAGTGGCACCGAGTCGGTGCTTTTTT
4|sgAARS2_3|AARS2	GCTGAGCCAGTTCAGAAGCA	0	1275	681	195	1	655	363	225	0	3976	702	275	3	144	743	266	2113	57505	AARS2	AARS2	4|sg_hAARS2_03|AARS2	AARS2	ACCGGCTGAGCCAGTTCAGAAGCAGTTTAAGAGCTATGCTGGAAACAGCATAGCAAGTTTAAATAAGGCTAGTCCGTTATCAACTTGAAAAAGTGGCACCGAGTCGGTGCTTTTTT
4|sgAARS2_4|AARS2	TCGTAGTGGATCTCAGTACA	2987	2268	451	148	0	113	39	502	0	0	295	35	0	1146	669	434	2457	57505	AARS2	AARS2	4|sg_hAARS2_04|AARS2	AARS2	ACCGTCGTAGTGGATCTCAGTACAGTTTAAGAGCTATGCTGGAAACAGCATAGCAAGTTTAAATAAGGCTAGTCCGTTATCAACTTGAAAAAGTGGCACCGAGTCGGTGCTTTTTT
4|sgAARSD1_1|AARSD1	ACCTCCGCTCCCAATCTACC	0	808	820	557	2	559	636	534	0	0	932	286	1542	0	627	1043	2976	80755	AARSD1	AARSD1	4|sg_hAARSD1_01|AARSD1	AARSD1	ACCGACCTCCGCTCCCAATCTACCGTTTAAGAGCTATGCTGGAAACAGCATAGCAAGTTTAAATAAGGCTAGTCCGTTATCAACTTGAAAAAGTGGCACCGAGTCGGTGCTTTTTT
4|sgAARSD1_2|AARSD1	CATTCGGGTTGTTAACATCG	0	0	1179	970	1	624	439	639	0	0	428	610	3478	4	621	991	2403	80755	AARSD1	AARSD1	4|sg_hAARSD1_02|AARSD1	AARSD1	ACCGCATTCGGGTTGTTAACATCGGTTTAAGAGCTATGCTGGAAACAGCATAGCAAGTTTAAATAAGGCTAGTCCGTTATCAACTTGAAAAAGTGGCACCGAGTCGGTGCTTTTTT
4|sgAARSD1_3|AARSD1	CCCAGACAGAAATATCAGGT	0	824	645	814	2	718	927	628	0	0	915	256	2	2570	1001	1891	2435	80755	AARSD1	AARSD1	4|sg_hAARSD1_03|AARSD1	AARSD1	ACCGCCCAGACAGAAATATCAGGTGTTTAAGAGCTATGCTGGAAACAGCATAGCAAGTTTAAATAAGGCTAGTCCGTTATCAACTTGAAAAAGTGGCACCGAGTCGGTGCTTTTTT
4|sgAARSD1_4|AARSD1	GTGCTGAGAGTGACTCGCCG	0	434	880	819	1	1378	540	1249	0	1	864	684	0	0	596	757	2538	80755	AARSD1	AARSD1	4|sg_hAARSD1_04|AARSD1	AARSD1	ACCGGTGCTGAGAGTGACTCGCCGGTTTAAGAGCTATGCTGGAAACAGCATAGCAAGTTTAAATAAGGCTAGTCCGTTATCAACTTGAAAAAGTGGCACCGAGTCGGTGCTTTTTT
4|sgAASDH_1|AASDH	AAATGAGTTGATAATGACGG	0	0	720	391	0	57	173	340	0	4070	1128	432	1793	1012	625	745	3348	132949	AASDH	AASDH	4|sg_hAASDH_01|AASDH	AASDH	ACCGAAATGAGTTGATAATGACGGGTTTAAGAGCTATGCTGGAAACAGCATAGCAAGTTTAAATAAGGCTAGTCCGTTATCAACTTGAAAAAGTGGCACCGAGTCGGTGCTTTTTT
4|sgAASDH_2|AASDH	GACAGTCAGATCAAACGTCA	1941	764	635	507	0	0	290	259	1	2098	562	126	1345	1964	863	387	1901	132949	AASDH	AASDH	4|sg_hAASDH_02|AASDH	AASDH	ACCGGACAGTCAGATCAAACGTCAGTTTAAGAGCTATGCTGGAAACAGCATAGCAAGTTTAAATAAGGCTAGTCCGTTATCAACTTGAAAAAGTGGCACCGAGTCGGTGCTTTTTT
4|sgAASDH_3|AASDH	TGTGAATTGCCTGTACAACT	8600	0	624	537	0	1	436	377	0	0	566	336	3115	1	594	186	1652	132949	AASDH	AASDH	4|sg_hAASDH_03|AASDH	AASDH	ACCGTGTGAATTGCCTGTACAACTGTTTAAGAGCTATGCTGGAAACAGCATAGCAAGTTTAAATAAGGCTAGTCCGTTATCAACTTGAAAAAGTGGCACCGAGTCGGTGCTTTTTT
4|sgAASDH_4|AASDH	TTGTTGGTACATCAGTACCT	0	657	362	549	0	0	265	328	0	0	541	220	0	33	571	1024	2012	132949	AASDH	AASDH	4|sg_hAASDH_04|AASDH	AASDH	ACCGTTGTTGGTACATCAGTACCTGTTTAAGAGCTATGCTGGAAACAGCATAGCAAGTTTAAATAAGGCTAGTCCGTTATCAACTTGAAAAAGTGGCACCGAGTCGGTGCTTTTTT
4|sgAASDHPPT_1|AASDHPPT	AGGAAAACCAGTTCTTGCAA	0	1949	464	322	1	0	0	341	0	0	486	355	0	1610	511	772	1733	60496	AASDHPPT	AASDHPPT	4|sg_hAASDHPPT_01|AASDHPPT	AASDHPPT	ACCGAGGAAAACCAGTTCTTGCAAGTTTAAGAGCTATGCTGGAAACAGCATAGCAAGTTTAAATAAGGCTAGTCCGTTATCAACTTGAAAAAGTGGCACCGAGTCGGTGCTTTTTT
4|sgAASDHPPT_2|AASDHPPT	CCCGAGGAGAAGGAGCGCAT	0	1282	740	380	0	0	247	288	0	0	672	153	2	1	1042	728	6448	60496	AASDHPPT	AASDHPPT	4|sg_hAASDHPPT_02|AASDHPPT	AASDHPPT	ACCGCCCGAGGAGAAGGAGCGCATGTTTAAGAGCTATGCTGGAAACAGCATAGCAAGTTTAAATAAGGCTAGTCCGTTATCAACTTGAAAAAGTGGCACCGAGTCGGTGCTTTTTT
4|sgAASDHPPT_3|AASDHPPT	CTGCCAGCAGCCATTCGGCT	1	1906	1180	861	2	96	557	721	0	0	502	222	2338	2	467	280	3329	60496	AASDHPPT	AASDHPPT	4|sg_hAASDHPPT_03|AASDHPPT	AASDHPPT	ACCGCTGCCAGCAGCCATTCGGCTGTTTAAGAGCTATGCTGGAAACAGCATAGCAAGTTTAAATAAGGCTAGTCCGTTATCAACTTGAAAAAGTGGCACCGAGTCGGTGCTTTTTT
4|sgAASDHPPT_4|AASDHPPT	GCTGAACCTGAGCTGCAAGT	0	1419	467	108	0	117	298	73	0	0	176	72	0	0	202	73	1939	60496	AASDHPPT	AASDHPPT	4|sg_hAASDHPPT_04|AASDHPPT	AASDHPPT	ACCGGCTGAACCTGAGCTGCAAGTGTTTAAGAGCTATGCTGGAAACAGCATAGCAAGTTTAAATAAGGCTAGTCCGTTATCAACTTGAAAAAGTGGCACCGAGTCGGTGCTTTTTT
4|sgAASS_1|AASS	AAGACCTCAGAAAAGTGTAT	0	1098	1145	730	1	466	421	452	0	2834	288	239	921	2	1051	861	2207	10157	AASS	AASS	4|sg_hAASS_01|AASS	AASS	ACCGAAGACCTCAGAAAAGTGTATGTTTAAGAGCTATGCTGGAAACAGCATAGCAAGTTTAAATAAGGCTAGTCCGTTATCAACTTGAAAAAGTGGCACCGAGTCGGTGCTTTTTT
4|sgAASS_2|AASS	CATCACAAACAAAGTTAACA	0	3036	1963	1491	5	484	2395	1207	0	0	1333	1357	5	3482	1619	1819	4742	10157	AASS	AASS	4|sg_hAASS_02|AASS	AASS	ACCGCATCACAAACAAAGTTAACAGTTTAAGAGCTATGCTGGAAACAGCATAGCAAGTTTAAATAAGGCTAGTCCGTTATCAACTTGAAAAAGTGGCACCGAGTCGGTGCTTTTTT
4|sgAASS_3|AASS	CGTGCTCAGTCACTTTCAAT	0	317	744	607	0	263	820	385	0	2379	937	492	0	1	805	784	2197	10157	AASS	AASS	4|sg_hAASS_03|AASS	AASS	ACCGCGTGCTCAGTCACTTTCAATGTTTAAGAGCTATGCTGGAAACAGCATAGCAAGTTTAAATAAGGCTAGTCCGTTATCAACTTGAAAAAGTGGCACCGAGTCGGTGCTTTTTT
4|sgAASS_4|AASS	GGGTAGTGGCATTTGGACAG	1901	1289	1770	1449	0	945	1117	965	0	1500	2703	1159	1721	982	2511	1182	4019	10157	AASS	AASS	4|sg_hAASS_04|AASS	AASS	ACCGGGGTAGTGGCATTTGGACAGGTTTAAGAGCTATGCTGGAAACAGCATAGCAAGTTTAAATAAGGCTAGTCCGTTATCAACTTGAAAAAGTGGCACCGAGTCGGTGCTTTTTT
4|sgAATF_1|AATF	AAACCACCTCTAGAAAAGCA	3567	225	467	357	1	0	300	458	0	0	550	319	7732	4	422	276	2116	26574	AATF	AATF	4|sg_hAATF_01|AATF	AATF	ACCGAAACCACCTCTAGAAAAGCAGTTTAAGAGCTATGCTGGAAACAGCATAGCAAGTTTAAATAAGGCTAGTCCGTTATCAACTTGAAAAAGTGGCACCGAGTCGGTGCTTTTTT
4|sgAATF_2|AATF	AGAAACTTTGACACTAGAGA	1	914	1479	1383	1	165	407	752	0	3	830	352	67	1168	641	1255	4711	26574	AATF	AATF	4|sg_hAATF_02|AATF	AATF	ACCGAGAAACTTTGACACTAGAGAGTTTAAGAGCTATGCTGGAAACAGCATAGCAAGTTTAAATAAGGCTAGTCCGTTATCAACTTGAAAAAGTGGCACCGAGTCGGTGCTTTTTT
4|sgAATF_3|AATF	AGGCACTTAAAGCATTGTTG	0	913	265	190	0	420	227	243	0	0	634	202	1	0	355	373	2782	26574	AATF	AATF	4|sg_hAATF_03|AATF	AATF	ACCGAGGCACTTAAAGCATTGTTGGTTTAAGAGCTATGCTGGAAACAGCATAGCAAGTTTAAATAAGGCTAGTCCGTTATCAACTTGAAAAAGTGGCACCGAGTCGGTGCTTTTTT
4|sgAATF_4|AATF	GAATATGATGAGGACGACCT	5001	3303	1523	783	0	778	1206	860	0	5	1692	827	5	6734	1540	1946	7209	26574	AATF	AATF	4|sg_hAATF_04|AATF	AATF	ACCGGAATATGATGAGGACGACCTGTTTAAGAGCTATGCTGGAAACAGCATAGCAAGTTTAAATAAGGCTAGTCCGTTATCAACTTGAAAAAGTGGCACCGAGTCGGTGCTTTTTT
4|sgAATK_1|AATK	AGCACCGGAACCACGCCCGG	0	2220	1360	1291	1	467	403	1283	0	0	1342	561	5322	1	1503	2088	4145	9625	AATK	AATK	4|sg_hAATK_01|AATK	AATK	ACCGAGCACCGGAACCACGCCCGGGTTTAAGAGCTATGCTGGAAACAGCATAGCAAGTTTAAATAAGGCTAGTCCGTTATCAACTTGAAAAAGTGGCACCGAGTCGGTGCTTTTTT
4|sgAATK_2|AATK	CTCCTCAAGTCCACAGACGT	0	0	400	505	1	379	84	242	0	0	468	333	0	962	875	966	2135	9625	AATK	AATK	4|sg_hAATK_02|AATK	AATK	ACCGCTCCTCAAGTCCACAGACGTGTTTAAGAGCTATGCTGGAAACAGCATAGCAAGTTTAAATAAGGCTAGTCCGTTATCAACTTGAAAAAGTGGCACCGAGTCGGTGCTTTTTT
4|sgAATK_3|AATK	GCATAGCAACCTGCTCGTCG	0	1944	1593	1183	2	590	532	1146	0	3117	2258	1114	6541	1452	1562	3449	3691	9625	AATK	AATK	4|sg_hAATK_03|AATK	AATK	ACCGGCATAGCAACCTGCTCGTCGGTTTAAGAGCTATGCTGGAAACAGCATAGCAAGTTTAAATAAGGCTAGTCCGTTATCAACTTGAAAAAGTGGCACCGAGTCGGTGCTTTTTT
4|sgAATK_4|AATK	GTGTCAGCCAACAACAACAG	2692	752	450	585	0	742	517	695	0	4593	916	421	1412	2	953	446	1718	9625	AATK	AATK	4|sg_hAATK_04|AATK	AATK	ACCGGTGTCAGCCAACAACAACAGGTTTAAGAGCTATGCTGGAAACAGCATAGCAAGTTTAAATAAGGCTAGTCCGTTATCAACTTGAAAAAGTGGCACCGAGTCGGTGCTTTTTT
4|sgABAT_1|ABAT	CCTTAAAGACCATCTTCATG	0	1186	557	319	4	0	634	696	0	4744	1024	383	0	0	362	59	1756	18	ABAT	ABAT	4|sg_hABAT_01|ABAT	ABAT	ACCGCCTTAAAGACCATCTTCATGGTTTAAGAGCTATGCTGGAAACAGCATAGCAAGTTTAAATAAGGCTAGTCCGTTATCAACTTGAAAAAGTGGCACCGAGTCGGTGCTTTTTT
4|sgABAT_2|ABAT	GAAAGAAGTCATCGGATGCG	2130	0	1358	653	0	541	1201	763	1	2694	1714	1425	1700	6551	1556	1767	3089	18	ABAT	ABAT	4|sg_hABAT_02|ABAT	ABAT	ACCGGAAAGAAGTCATCGGATGCGGTTTAAGAGCTATGCTGGAAACAGCATAGCAAGTTTAAATAAGGCTAGTCCGTTATCAACTTGAAAAAGTGGCACCGAGTCGGTGCTTTTTT
4|sgABAT_3|ABAT	GTGAATGGCTTTAGAGTGCG	0	283	1377	1041	1781	321	187	930	0	828	2240	1037	5510	590	1887	1819	3762	18	ABAT	ABAT	4|sg_hABAT_03|ABAT	ABAT	ACCGGTGAATGGCTTTAGAGTGCGGTTTAAGAGCTATGCTGGAAACAGCATAGCAAGTTTAAATAAGGCTAGTCCGTTATCAACTTGAAAAAGTGGCACCGAGTCGGTGCTTTTTT
4|sgABAT_4|ABAT	TGCAATTACGAAGAGAGCCG	0	2285	1533	1071	1	1179	646	1014	0	2098	1556	604	1820	1732	1316	2067	4285	18	ABAT	ABAT	4|sg_hABAT_04|ABAT	ABAT	ACCGTGCAATTACGAAGAGAGCCGGTTTAAGAGCTATGCTGGAAACAGCATAGCAAGTTTAAATAAGGCTAGTCCGTTATCAACTTGAAAAAGTGGCACCGAGTCGGTGCTTTTTT
4|sgABCA1_1|ABCA1	AATGCAGAGAAAGCTATCTG	1970	637	1696	1091	758	1735	486	671	0	0	2141	504	0	0	1808	1837	3748	19	ABCA1	ABCA1	4|sg_hABCA1_01|ABCA1	ABCA1	ACCGAATGCAGAGAAAGCTATCTGGTTTAAGAGCTATGCTGGAAACAGCATAGCAAGTTTAAATAAGGCTAGTCCGTTATCAACTTGAAAAAGTGGCACCGAGTCGGTGCTTTTTT
4|sgABCA1_2|ABCA1	GGACACGCCCAGCTTCAAGT	0	1334	1594	1450	2	749	656	979	0	0	1491	988	5084	2	1162	815	3510	19	ABCA1	ABCA1	4|sg_hABCA1_02|ABCA1	ABCA1	ACCGGGACACGCCCAGCTTCAAGTGTTTAAGAGCTATGCTGGAAACAGCATAGCAAGTTTAAATAAGGCTAGTCCGTTATCAACTTGAAAAAGTGGCACCGAGTCGGTGCTTTTTT
4|sgABCA1_3|ABCA1	GTGGCATGGCAGGACTACGT	0	904	638	748	3239	593	1266	703	0	3130	953	531	1377	753	565	688	2524	19	ABCA1	ABCA1	4|sg_hABCA1_03|ABCA1	ABCA1	ACCGGTGGCATGGCAGGACTACGTGTTTAAGAGCTATGCTGGAAACAGCATAGCAAGTTTAAATAAGGCTAGTCCGTTATCAACTTGAAAAAGTGGCACCGAGTCGGTGCTTTTTT
4|sgABCA1_4|ABCA1	TTGGACAGCCCAAGACATCG	0	2328	1231	1024	1	0	1107	852	0	0	1068	523	1468	3740	1219	1188	2392	19	ABCA1	ABCA1	4|sg_hABCA1_04|ABCA1	ABCA1	ACCGTTGGACAGCCCAAGACATCGGTTTAAGAGCTATGCTGGAAACAGCATAGCAAGTTTAAATAAGGCTAGTCCGTTATCAACTTGAAAAAGTGGCACCGAGTCGGTGCTTTTTT
4|sgABCA10_1|ABCA10	ACTCTCTGAAATAACTGACA	0	0	843	643	2	273	808	543	8658	1	848	444	2	0	761	1619	2199	10349	ABCA10	ABCA10	4|sg_hABCA10_01|ABCA10	ABCA10	ACCGACTCTCTGAAATAACTGACAGTTTAAGAGCTATGCTGGAAACAGCATAGCAAGTTTAAATAAGGCTAGTCCGTTATCAACTTGAAAAAGTGGCACCGAGTCGGTGCTTTTTT
4|sgABCA10_2|ABCA10	GACACTTCAGTGAATGCACG	0	465	633	452	1	0	87	621	0	3988	1446	487	4	4234	1217	1214	2384	10349	ABCA10	ABCA10	4|sg_hABCA10_02|ABCA10	ABCA10	ACCGGACACTTCAGTGAATGCACGGTTTAAGAGCTATGCTGGAAACAGCATAGCAAGTTTAAATAAGGCTAGTCCGTTATCAACTTGAAAAAGTGGCACCGAGTCGGTGCTTTTTT
4|sgABCA10_3|ABCA10	GGGTACTGAAGAGGATAAGT	1977	0	936	844	1985	1319	525	533	1	1809	700	236	2295	0	894	500	2643	10349	ABCA10	ABCA10	4|sg_hABCA10_03|ABCA10	ABCA10	ACCGGGGTACTGAAGAGGATAAGTGTTTAAGAGCTATGCTGGAAACAGCATAGCAAGTTTAAATAAGGCTAGTCCGTTATCAACTTGAAAAAGTGGCACCGAGTCGGTGCTTTTTT
4|sgABCA10_4|ABCA10	TCCTTATTAAAACACTCATG	2920	0	507	547	1242	0	651	384	0	0	586	367	0	0	466	369	1634	10349	ABCA10	ABCA10	4|sg_hABCA10_04|ABCA10	ABCA10	ACCGTCCTTATTAAAACACTCATGGTTTAAGAGCTATGCTGGAAACAGCATAGCAAGTTTAAATAAGGCTAGTCCGTTATCAACTTGAAAAAGTGGCACCGAGTCGGTGCTTTTTT
4|sgABCA12_1|ABCA12	ACGGTCATATAATACACAAG	1	0	619	856	0	185	392	395	1	1	804	288	0	0	351	1164	2169	26154	ABCA12	ABCA12	4|sg_hABCA12_01|ABCA12	ABCA12	ACCGACGGTCATATAATACACAAGGTTTAAGAGCTATGCTGGAAACAGCATAGCAAGTTTAAATAAGGCTAGTCCGTTATCAACTTGAAAAAGTGGCACCGAGTCGGTGCTTTTTT
4|sgABCA12_2|ABCA12	ATGGTGCTAAATGATCCTTG	0	726	1121	721	1169	848	574	668	14276	744	1198	798	1926	2235	972	687	2670	26154	ABCA12	ABCA12	4|sg_hABCA12_02|ABCA12	ABCA12	ACCGATGGTGCTAAATGATCCTTGGTTTAAGAGCTATGCTGGAAACAGCATAGCAAGTTTAAATAAGGCTAGTCCGTTATCAACTTGAAAAAGTGGCACCGAGTCGGTGCTTTTTT
4|sgABCA12_3|ABCA12	GAGGTGATACCCATCGCCAA	1	586	850	709	2	163	359	666	0	4913	752	716	778	1	1195	1005	2083	26154	ABCA12	ABCA12	4|sg_hABCA12_03|ABCA12	ABCA12	ACCGGAGGTGATACCCATCGCCAAGTTTAAGAGCTATGCTGGAAACAGCATAGCAAGTTTAAATAAGGCTAGTCCGTTATCAACTTGAAAAAGTGGCACCGAGTCGGTGCTTTTTT
4|sgABCA12_4|ABCA12	GGCAGCTATAAATACAACCC	0	968	1334	928	3686	199	1416	1188	0	0	1226	646	1	1390	1023	1625	3619	26154	ABCA12	ABCA12	4|sg_hABCA12_04|ABCA12	ABCA12	ACCGGGCAGCTATAAATACAACCCGTTTAAGAGCTATGCTGGAAACAGCATAGCAAGTTTAAATAAGGCTAGTCCGTTATCAACTTGAAAAAGTGGCACCGAGTCGGTGCTTTTTT
4|sgABCA13_1|ABCA13	ACAATTTAGCTGATTCGGCG	0	722	1042	873	0	840	622	750	0	2104	708	437	3157	870	763	1911	2732	154664	ABCA13	ABCA13	4|sg_hABCA13_01|ABCA13	ABCA13	ACCGACAATTTAGCTGATTCGGCGGTTTAAGAGCTATGCTGGAAACAGCATAGCAAGTTTAAATAAGGCTAGTCCGTTATCAACTTGAAAAAGTGGCACCGAGTCGGTGCTTTTTT
4|sgABCA13_2|ABCA13	CAATGACTTCCATAATTGGG	0	705	924	843	0	383	220	575	0	0	1297	627	2	0	1436	2188	2447	154664	ABCA13	ABCA13	4|sg_hABCA13_02|ABCA13	ABCA13	ACCGCAATGACTTCCATAATTGGGGTTTAAGAGCTATGCTGGAAACAGCATAGCAAGTTTAAATAAGGCTAGTCCGTTATCAACTTGAAAAAGTGGCACCGAGTCGGTGCTTTTTT
4|sgABCA13_3|ABCA13	GGCTTCATTTAATAACACTG	0	0	583	691	0	263	797	361	0	0	502	178	1	1622	792	854	2147	154664	ABCA13	ABCA13	4|sg_hABCA13_03|ABCA13	ABCA13	ACCGGGCTTCATTTAATAACACTGGTTTAAGAGCTATGCTGGAAACAGCATAGCAAGTTTAAATAAGGCTAGTCCGTTATCAACTTGAAAAAGTGGCACCGAGTCGGTGCTTTTTT
4|sgABCA13_4|ABCA13	TATCAGGAAGACTTGCGAAG	0	600	670	768	1605	0	379	555	1	2154	1028	399	0	0	692	293	2422	154664	ABCA13	ABCA13	4|sg_hABCA13_04|ABCA13	ABCA13	ACCGTATCAGGAAGACTTGCGAAGGTTTAAGAGCTATGCTGGAAACAGCATAGCAAGTTTAAATAAGGCTAGTCCGTTATCAACTTGAAAAAGTGGCACCGAGTCGGTGCTTTTTT
4|sgABCA2_1|ABCA2	CATGTACGTGGCGATCCGAG	3056	0	1252	1284	3	477	1007	1218	0	0	1151	620	2	2994	1290	2474	3331	20	ABCA2	ABCA2	4|sg_hABCA2_01|ABCA2	ABCA2	ACCGCATGTACGTGGCGATCCGAGGTTTAAGAGCTATGCTGGAAACAGCATAGCAAGTTTAAATAAGGCTAGTCCGTTATCAACTTGAAAAAGTGGCACCGAGTCGGTGCTTTTTT
4|sgABCA2_2|ABCA2	CTTGTGTGGCAACAACCGGT	0	1194	259	380	1	0	225	401	0	1655	282	137	2025	1067	435	272	961	20	ABCA2	ABCA2	4|sg_hABCA2_02|ABCA2	ABCA2	ACCGCTTGTGTGGCAACAACCGGTGTTTAAGAGCTATGCTGGAAACAGCATAGCAAGTTTAAATAAGGCTAGTCCGTTATCAACTTGAAAAAGTGGCACCGAGTCGGTGCTTTTTT
4|sgABCA2_3|ABCA2	GATGTCGTGCCCGTAGATGG	6478	1918	1311	974	0	919	350	707	0	1263	1422	1110	1261	1104	1982	1803	4124	20	ABCA2	ABCA2	4|sg_hABCA2_03|ABCA2	ABCA2	ACCGGATGTCGTGCCCGTAGATGGGTTTAAGAGCTATGCTGGAAACAGCATAGCAAGTTTAAATAAGGCTAGTCCGTTATCAACTTGAAAAAGTGGCACCGAGTCGGTGCTTTTTT
4|sgABCA2_4|ABCA2	TAGGGGATGAAATTGCCACG	0	1600	1645	1014	1	643	926	769	0	3367	1217	1112	2	1561	1387	2422	2726	20	ABCA2	ABCA2	4|sg_hABCA2_04|ABCA2	ABCA2	ACCGTAGGGGATGAAATTGCCACGGTTTAAGAGCTATGCTGGAAACAGCATAGCAAGTTTAAATAAGGCTAGTCCGTTATCAACTTGAAAAAGTGGCACCGAGTCGGTGCTTTTTT
4|sgABCA3_1|ABCA3	AATGCGCATTTACTGACCGA	0	1029	734	668	1	583	382	575	0	0	459	751	0	0	407	156	2452	21	ABCA3	ABCA3	4|sg_hABCA3_01|ABCA3	ABCA3	ACCGAATGCGCATTTACTGACCGAGTTTAAGAGCTATGCTGGAAACAGCATAGCAAGTTTAAATAAGGCTAGTCCGTTATCAACTTGAAAAAGTGGCACCGAGTCGGTGCTTTTTT
4|sgABCA3_2|ABCA3	ACCTACGGTTCAGTTACACA	0	0	1359	958	2	1031	855	771	1	1943	1236	1049	3	4650	1584	1824	3136	21	ABCA3	ABCA3	4|sg_hABCA3_02|ABCA3	ABCA3	ACCGACCTACGGTTCAGTTACACAGTTTAAGAGCTATGCTGGAAACAGCATAGCAAGTTTAAATAAGGCTAGTCCGTTATCAACTTGAAAAAGTGGCACCGAGTCGGTGCTTTTTT
4|sgABCA3_3|ABCA3	AGTGGACGGGCATACATCAG	0	3286	1111	1076	1509	897	1348	955	0	0	2124	849	1	2167	1544	1570	3571	21	ABCA3	ABCA3	4|sg_hABCA3_03|ABCA3	ABCA3	ACCGAGTGGACGGGCATACATCAGGTTTAAGAGCTATGCTGGAAACAGCATAGCAAGTTTAAATAAGGCTAGTCCGTTATCAACTTGAAAAAGTGGCACCGAGTCGGTGCTTTTTT
4|sgABCA3_4|ABCA3	CCTCCTGAGTCCCGTCAACG	0	5795	2795	2627	3452	812	2161	2192	0	1497	2600	2027	3994	1693	2921	4197	7136	21	ABCA3	ABCA3	4|sg_hABCA3_04|ABCA3	ABCA3	ACCGCCTCCTGAGTCCCGTCAACGGTTTAAGAGCTATGCTGGAAACAGCATAGCAAGTTTAAATAAGGCTAGTCCGTTATCAACTTGAAAAAGTGGCACCGAGTCGGTGCTTTTTT
4|sgABCA4_1|ABCA4	AAAGACCGAGCCCCTAACAG	1	126	1569	1218	2	1306	564	1325	0	0	2315	534	1228	1421	1470	2121	4338	24	ABCA4	ABCA4	4|sg_hABCA4_01|ABCA4	ABCA4	ACCGAAAGACCGAGCCCCTAACAGGTTTAAGAGCTATGCTGGAAACAGCATAGCAAGTTTAAATAAGGCTAGTCCGTTATCAACTTGAAAAAGTGGCACCGAGTCGGTGCTTTTTT
4|sgABCA4_2|ABCA4	AGCACCATACCCGCAAACAG	0	2134	1164	991	1	682	761	858	0	1775	1030	750	1696	2	1173	917	3574	24	ABCA4	ABCA4	4|sg_hABCA4_02|ABCA4	ABCA4	ACCGAGCACCATACCCGCAAACAGGTTTAAGAGCTATGCTGGAAACAGCATAGCAAGTTTAAATAAGGCTAGTCCGTTATCAACTTGAAAAAGTGGCACCGAGTCGGTGCTTTTTT
4|sgABCA4_3|ABCA4	AGGGTGTTGAGTTGCCACAG	0	0	356	187	0	0	73	380	0	1724	655	200	0	0	600	393	1545	24	ABCA4	ABCA4	4|sg_hABCA4_03|ABCA4	ABCA4	ACCGAGGGTGTTGAGTTGCCACAGGTTTAAGAGCTATGCTGGAAACAGCATAGCAAGTTTAAATAAGGCTAGTCCGTTATCAACTTGAAAAAGTGGCACCGAGTCGGTGCTTTTTT
4|sgABCA4_4|ABCA4	GATCCGAATGGACATAGACG	3002	2280	2045	2196	3	2382	1391	1174	0	925	1529	1501	2	3773	2528	2678	6691	24	ABCA4	ABCA4	4|sg_hABCA4_04|ABCA4	ABCA4	ACCGGATCCGAATGGACATAGACGGTTTAAGAGCTATGCTGGAAACAGCATAGCAAGTTTAAATAAGGCTAGTCCGTTATCAACTTGAAAAAGTGGCACCGAGTCGGTGCTTTTTT
4|sgABCA5_1|ABCA5	AAAATGAATGATACCTCAGG	1	655	668	639	994	0	134	349	0	1	769	319	0	0	393	823	1896	23461	ABCA5	ABCA5	4|sg_hABCA5_01|ABCA5	ABCA5	ACCGAAAATGAATGATACCTCAGGGTTTAAGAGCTATGCTGGAAACAGCATAGCAAGTTTAAATAAGGCTAGTCCGTTATCAACTTGAAAAAGTGGCACCGAGTCGGTGCTTTTTT
4|sgABCA5_2|ABCA5	AAATTATGAGGAGTTATCAG	0	590	924	684	1	349	738	454	1	5236	653	243	3895	1533	905	569	2059	23461	ABCA5	ABCA5	4|sg_hABCA5_02|ABCA5	ABCA5	ACCGAAATTATGAGGAGTTATCAGGTTTAAGAGCTATGCTGGAAACAGCATAGCAAGTTTAAATAAGGCTAGTCCGTTATCAACTTGAAAAAGTGGCACCGAGTCGGTGCTTTTTT
4|sgABCA5_3|ABCA5	GAAATAGATACCTTTCCCCG	0	0	530	521	972	477	616	615	0	2068	1046	373	0	1	897	939	1878	23461	ABCA5	ABCA5	4|sg_hABCA5_03|ABCA5	ABCA5	ACCGGAAATAGATACCTTTCCCCGGTTTAAGAGCTATGCTGGAAACAGCATAGCAAGTTTAAATAAGGCTAGTCCGTTATCAACTTGAAAAAGTGGCACCGAGTCGGTGCTTTTTT
4|sgABCA5_4|ABCA5	TGACAGTGACTATGTATCCG	0	0	816	458	1	141	557	501	0	0	686	555	1	1802	1344	820	2380	23461	ABCA5	ABCA5	4|sg_hABCA5_04|ABCA5	ABCA5	ACCGTGACAGTGACTATGTATCCGGTTTAAGAGCTATGCTGGAAACAGCATAGCAAGTTTAAATAAGGCTAGTCCGTTATCAACTTGAAAAAGTGGCACCGAGTCGGTGCTTTTTT
4|sgABCA6_1|ABCA6	AACCAATCACCCTGTGATGG	0	500	677	439	1	0	433	360	0	0	1136	400	1	0	587	1440	2049	23460	ABCA6	ABCA6	4|sg_hABCA6_01|ABCA6	ABCA6	ACCGAACCAATCACCCTGTGATGGGTTTAAGAGCTATGCTGGAAACAGCATAGCAAGTTTAAATAAGGCTAGTCCGTTATCAACTTGAAAAAGTGGCACCGAGTCGGTGCTTTTTT
4|sgABCA6_2|ABCA6	CAGACAGCTGTGAGTGACAT	0	0	1731	1135	1	333	2311	938	0	0	1106	943	1	0	1266	2811	3203	23460	ABCA6	ABCA6	4|sg_hABCA6_02|ABCA6	ABCA6	ACCGCAGACAGCTGTGAGTGACATGTTTAAGAGCTATGCTGGAAACAGCATAGCAAGTTTAAATAAGGCTAGTCCGTTATCAACTTGAAAAAGTGGCACCGAGTCGGTGCTTTTTT
4|sgABCA6_3|ABCA6	GGCACCAAATAAAACACACA	0	1002	2419	1864	2422	1011	1493	1657	0	2044	3009	875	4449	1403	1930	3276	4979	23460	ABCA6	ABCA6	4|sg_hABCA6_03|ABCA6	ABCA6	ACCGGGCACCAAATAAAACACACAGTTTAAGAGCTATGCTGGAAACAGCATAGCAAGTTTAAATAAGGCTAGTCCGTTATCAACTTGAAAAAGTGGCACCGAGTCGGTGCTTTTTT
4|sgABCA6_4|ABCA6	TTGTATATGAGTCTCCTGAA	0	2110	1374	1346	3	534	1421	926	0	3532	2217	1238	4018	1952	1317	1366	3820	23460	ABCA6	ABCA6	4|sg_hABCA6_04|ABCA6	ABCA6	ACCGTTGTATATGAGTCTCCTGAAGTTTAAGAGCTATGCTGGAAACAGCATAGCAAGTTTAAATAAGGCTAGTCCGTTATCAACTTGAAAAAGTGGCACCGAGTCGGTGCTTTTTT
4|sgABCA7_1|ABCA7	AGTACGGGATCCCTGAACCA	0	1	768	509	0	188	206	513	0	0	837	591	0	0	828	1253	2173	10347	ABCA7	ABCA7	4|sg_hABCA7_01|ABCA7	ABCA7	ACCGAGTACGGGATCCCTGAACCAGTTTAAGAGCTATGCTGGAAACAGCATAGCAAGTTTAAATAAGGCTAGTCCGTTATCAACTTGAAAAAGTGGCACCGAGTCGGTGCTTTTTT
4|sgABCA7_2|ABCA7	CTGGCCTAGACGTAACCCTA	0	0	597	439	0	0	142	176	0	0	824	512	986	3372	410	658	2167	10347	ABCA7	ABCA7	4|sg_hABCA7_02|ABCA7	ABCA7	ACCGCTGGCCTAGACGTAACCCTAGTTTAAGAGCTATGCTGGAAACAGCATAGCAAGTTTAAATAAGGCTAGTCCGTTATCAACTTGAAAAAGTGGCACCGAGTCGGTGCTTTTTT
4|sgABCA7_3|ABCA7	TCAAACAGCACGTTGTACTG	9403	1180	1170	1244	2010	1657	385	814	0	0	1149	423	2791	4	1173	1494	3029	10347	ABCA7	ABCA7	4|sg_hABCA7_03|ABCA7	ABCA7	ACCGTCAAACAGCACGTTGTACTGGTTTAAGAGCTATGCTGGAAACAGCATAGCAAGTTTAAATAAGGCTAGTCCGTTATCAACTTGAAAAAGTGGCACCGAGTCGGTGCTTTTTT
4|sgABCA7_4|ABCA7	TGGACATTGACGTGGTCACG	0	0	743	1010	2	613	622	753	0	2	358	269	2871	3	702	406	2345	10347	ABCA7	ABCA7	4|sg_hABCA7_04|ABCA7	ABCA7	ACCGTGGACATTGACGTGGTCACGGTTTAAGAGCTATGCTGGAAACAGCATAGCAAGTTTAAATAAGGCTAGTCCGTTATCAACTTGAAAAAGTGGCACCGAGTCGGTGCTTTTTT
4|sgABCA8_1|ABCA8	AAATTATCAGCCAAAAGCGA	0	3342	1719	1522	41	416	813	1100	15079	1	1889	737	1	1201	1311	1891	4812	10351	ABCA8	ABCA8	4|sg_hABCA8_01|ABCA8	ABCA8	ACCGAAATTATCAGCCAAAAGCGAGTTTAAGAGCTATGCTGGAAACAGCATAGCAAGTTTAAATAAGGCTAGTCCGTTATCAACTTGAAAAAGTGGCACCGAGTCGGTGCTTTTTT
4|sgABCA8_2|ABCA8	CTGTTAATGTCACAAGAGAG	0	193	958	1078	0	997	351	682	0	0	1588	572	1	0	1456	1174	1710	10351	ABCA8	ABCA8	4|sg_hABCA8_02|ABCA8	ABCA8	ACCGCTGTTAATGTCACAAGAGAGGTTTAAGAGCTATGCTGGAAACAGCATAGCAAGTTTAAATAAGGCTAGTCCGTTATCAACTTGAAAAAGTGGCACCGAGTCGGTGCTTTTTT
4|sgABCA8_3|ABCA8	GACACCCCCAAAAGACAGTG	0	1525	1913	1288	2	586	1212	1251	0	540	1816	772	2	7297	883	1554	2686	10351	ABCA8	ABCA8	4|sg_hABCA8_03|ABCA8	ABCA8	ACCGGACACCCCCAAAAGACAGTGGTTTAAGAGCTATGCTGGAAACAGCATAGCAAGTTTAAATAAGGCTAGTCCGTTATCAACTTGAAAAAGTGGCACCGAGTCGGTGCTTTTTT
4|sgABCA8_4|ABCA8	GCAAATCTGCGCAATTGCAA	0	488	1510	1076	4246	591	748	734	1	0	863	415	3	1713	878	1209	2838	10351	ABCA8	ABCA8	4|sg_hABCA8_04|ABCA8	ABCA8	ACCGGCAAATCTGCGCAATTGCAAGTTTAAGAGCTATGCTGGAAACAGCATAGCAAGTTTAAATAAGGCTAGTCCGTTATCAACTTGAAAAAGTGGCACCGAGTCGGTGCTTTTTT
4|sgABCA9_1|ABCA9	ATATCAGAAAAGTTACCCGT	0	0	525	349	0	326	670	308	0	0	363	455	4320	6	590	297	1790	10350	ABCA9	ABCA9	4|sg_hABCA9_01|ABCA9	ABCA9	ACCGATATCAGAAAAGTTACCCGTGTTTAAGAGCTATGCTGGAAACAGCATAGCAAGTTTAAATAAGGCTAGTCCGTTATCAACTTGAAAAAGTGGCACCGAGTCGGTGCTTTTTT
4|sgABCA9_2|ABCA9	CTTGATAGATGTTCTAACCA	0	5845	1815	1418	2	1355	1133	995	0	0	1677	970	2286	6	2206	1861	4034	10350	ABCA9	ABCA9	4|sg_hABCA9_02|ABCA9	ABCA9	ACCGCTTGATAGATGTTCTAACCAGTTTAAGAGCTATGCTGGAAACAGCATAGCAAGTTTAAATAAGGCTAGTCCGTTATCAACTTGAAAAAGTGGCACCGAGTCGGTGCTTTTTT
4|sgABCA9_3|ABCA9	TGGCAGGAAGAACAATCATG	0	518	1330	1188	1	494	592	1037	0	1831	1689	664	2968	2178	1684	1169	2981	10350	ABCA9	ABCA9	4|sg_hABCA9_03|ABCA9	ABCA9	ACCGTGGCAGGAAGAACAATCATGGTTTAAGAGCTATGCTGGAAACAGCATAGCAAGTTTAAATAAGGCTAGTCCGTTATCAACTTGAAAAAGTGGCACCGAGTCGGTGCTTTTTT
4|sgABCA9_4|ABCA9	TTATTTCTAACTAGACAGGA	1	2439	622	545	2	0	747	640	8918	0	748	461	1	115	1149	899	1527	10350	ABCA9	ABCA9	4|sg_hABCA9_04|ABCA9	ABCA9	ACCGTTATTTCTAACTAGACAGGAGTTTAAGAGCTATGCTGGAAACAGCATAGCAAGTTTAAATAAGGCTAGTCCGTTATCAACTTGAAAAAGTGGCACCGAGTCGGTGCTTTTTT
4|sgABCB1_1|ABCB1	ATTGACAGCTATTCGAAGAG	0	1817	1069	749	0	427	160	369	0	2007	835	568	1	0	936	1054	1720	5243	ABCB1	ABCB1	4|sg_hABCB1_01|ABCB1	ABCB1	ACCGATTGACAGCTATTCGAAGAGGTTTAAGAGCTATGCTGGAAACAGCATAGCAAGTTTAAATAAGGCTAGTCCGTTATCAACTTGAAAAAGTGGCACCGAGTCGGTGCTTTTTT
4|sgABCB1_2|ABCB1	CTGGAGAGATCCTCACCAAG	0	1722	1288	809	2	302	101	713	1	4544	1212	405	0	0	618	1797	2966	5243	ABCB1	ABCB1	4|sg_hABCB1_02|ABCB1	ABCB1	ACCGCTGGAGAGATCCTCACCAAGGTTTAAGAGCTATGCTGGAAACAGCATAGCAAGTTTAAATAAGGCTAGTCCGTTATCAACTTGAAAAAGTGGCACCGAGTCGGTGCTTTTTT
4|sgABCB1_3|ABCB1	TAGGTGATATCAATGATACA	0	0	293	221	0	188	222	186	0	0	604	411	3360	2	372	875	1291	5243	ABCB1	ABCB1	4|sg_hABCB1_03|ABCB1	ABCB1	ACCGTAGGTGATATCAATGATACAGTTTAAGAGCTATGCTGGAAACAGCATAGCAAGTTTAAATAAGGCTAGTCCGTTATCAACTTGAAAAAGTGGCACCGAGTCGGTGCTTTTTT
4|sgABCB1_4|ABCB1	TTTATAGTAGGATTTACACG	0	0	948	609	1	156	666	512	0	0	613	802	2500	2582	781	1056	2288	5243	ABCB1	ABCB1	4|sg_hABCB1_04|ABCB1	ABCB1	ACCGTTTATAGTAGGATTTACACGGTTTAAGAGCTATGCTGGAAACAGCATAGCAAGTTTAAATAAGGCTAGTCCGTTATCAACTTGAAAAAGTGGCACCGAGTCGGTGCTTTTTT
4|sgABCB10_1|ABCB10	ACAGCAATGATTGACACTGG	1863	1942	1005	808	1	330	499	537	0	5652	1318	432	0	0	1155	1723	3252	23456	ABCB10	ABCB10	4|sg_hABCB10_01|ABCB10	ABCB10	ACCGACAGCAATGATTGACACTGGGTTTAAGAGCTATGCTGGAAACAGCATAGCAAGTTTAAATAAGGCTAGTCCGTTATCAACTTGAAAAAGTGGCACCGAGTCGGTGCTTTTTT
4|sgABCB10_2|ABCB10	CTCAGTGCCGTGTTTCTGTG	8425	963	1551	1448	28	690	1174	967	0	2848	2290	1427	3534	4	1715	2134	3813	23456	ABCB10	ABCB10	4|sg_hABCB10_02|ABCB10	ABCB10	ACCGCTCAGTGCCGTGTTTCTGTGGTTTAAGAGCTATGCTGGAAACAGCATAGCAAGTTTAAATAAGGCTAGTCCGTTATCAACTTGAAAAAGTGGCACCGAGTCGGTGCTTTTTT
4|sgABCB10_3|ABCB10	GAGTTCACCCACGGTCATGT	3503	1992	935	1242	7	854	772	1192	0	0	809	754	0	0	1736	2121	4151	23456	ABCB10	ABCB10	4|sg_hABCB10_03|ABCB10	ABCB10	ACCGGAGTTCACCCACGGTCATGTGTTTAAGAGCTATGCTGGAAACAGCATAGCAAGTTTAAATAAGGCTAGTCCGTTATCAACTTGAAAAAGTGGCACCGAGTCGGTGCTTTTTT
4|sgABCB10_4|ABCB10	TATCGCCGTTCACTGGCCTG	0	4437	2276	2364	4	1530	1368	1485	1	218	1744	835	2	0	1789	2318	7178	23456	ABCB10	ABCB10	4|sg_hABCB10_04|ABCB10	ABCB10	ACCGTATCGCCGTTCACTGGCCTGGTTTAAGAGCTATGCTGGAAACAGCATAGCAAGTTTAAATAAGGCTAGTCCGTTATCAACTTGAAAAAGTGGCACCGAGTCGGTGCTTTTTT
4|sgABCB11_1|ABCB11	GAGCTCCCCAGATTTAGCAA	4294	1167	758	632	1246	72	255	327	0	0	892	268	1869	2598	1111	471	1758	8647	ABCB11	ABCB11	4|sg_hABCB11_01|ABCB11	ABCB11	ACCGGAGCTCCCCAGATTTAGCAAGTTTAAGAGCTATGCTGGAAACAGCATAGCAAGTTTAAATAAGGCTAGTCCGTTATCAACTTGAAAAAGTGGCACCGAGTCGGTGCTTTTTT
4|sgABCB11_2|ABCB11	GATTCTTTACTGGATTCGTG	0	1503	468	530	2490	744	233	466	0	0	947	493	1732	1069	505	1153	1703	8647	ABCB11	ABCB11	4|sg_hABCB11_02|ABCB11	ABCB11	ACCGGATTCTTTACTGGATTCGTGGTTTAAGAGCTATGCTGGAAACAGCATAGCAAGTTTAAATAAGGCTAGTCCGTTATCAACTTGAAAAAGTGGCACCGAGTCGGTGCTTTTTT
4|sgABCB11_3|ABCB11	TCAACATGGTCATTAAACCA	2686	1792	759	679	665	24	731	692	0	0	872	397	3022	2189	341	675	1677	8647	ABCB11	ABCB11	4|sg_hABCB11_03|ABCB11	ABCB11	ACCGTCAACATGGTCATTAAACCAGTTTAAGAGCTATGCTGGAAACAGCATAGCAAGTTTAAATAAGGCTAGTCCGTTATCAACTTGAAAAAGTGGCACCGAGTCGGTGCTTTTTT
4|sgABCB11_4|ABCB11	TTTCAGAATCCTCCTAACTG	0	1696	758	594	1	0	360	441	0	0	480	387	0	0	512	1321	1946	8647	ABCB11	ABCB11	4|sg_hABCB11_04|ABCB11	ABCB11	ACCGTTTCAGAATCCTCCTAACTGGTTTAAGAGCTATGCTGGAAACAGCATAGCAAGTTTAAATAAGGCTAGTCCGTTATCAACTTGAAAAAGTGGCACCGAGTCGGTGCTTTTTT
4|sgABCB4_1|ABCB4	ACACCACTGAACTCAATACG	1919	755	938	1103	1	314	558	394	1	0	675	225	2182	1	1173	313	2101	5244	ABCB4	ABCB4	4|sg_hABCB4_01|ABCB4	ABCB4	ACCGACACCACTGAACTCAATACGGTTTAAGAGCTATGCTGGAAACAGCATAGCAAGTTTAAATAAGGCTAGTCCGTTATCAACTTGAAAAAGTGGCACCGAGTCGGTGCTTTTTT
4|sgABCB4_2|ABCB4	CATTTCGGACCGTAGACAGT	0	1310	734	734	0	359	781	773	1	2173	945	586	127	0	934	781	2689	5244	ABCB4	ABCB4	4|sg_hABCB4_02|ABCB4	ABCB4	ACCGCATTTCGGACCGTAGACAGTGTTTAAGAGCTATGCTGGAAACAGCATAGCAAGTTTAAATAAGGCTAGTCCGTTATCAACTTGAAAAAGTGGCACCGAGTCGGTGCTTTTTT
4|sgABCB4_3|ABCB4	CCCTTCTCGAGCTAACGTCA	0	0	1235	1072	1	0	721	1141	0	3690	1427	607	5	2986	1843	2368	5103	5244	ABCB4	ABCB4	4|sg_hABCB4_03|ABCB4	ABCB4	ACCGCCCTTCTCGAGCTAACGTCAGTTTAAGAGCTATGCTGGAAACAGCATAGCAAGTTTAAATAAGGCTAGTCCGTTATCAACTTGAAAAAGTGGCACCGAGTCGGTGCTTTTTT
4|sgABCB4_4|ABCB4	TGGCCGTGGAAATGTAACCA	5479	1	973	1012	2	1335	459	1027	0	5773	1293	697	1	0	1644	1104	3846	5244	ABCB4	ABCB4	4|sg_hABCB4_04|ABCB4	ABCB4	ACCGTGGCCGTGGAAATGTAACCAGTTTAAGAGCTATGCTGGAAACAGCATAGCAAGTTTAAATAAGGCTAGTCCGTTATCAACTTGAAAAAGTGGCACCGAGTCGGTGCTTTTTT
4|sgABCB5_1|ABCB5	AGACGTGGATAGAGTCACTA	2829	0	937	783	1066	354	810	485	0	0	1095	787	1	1	1373	1630	2751	340273	ABCB5	ABCB5	4|sg_hABCB5_01|ABCB5	ABCB5	ACCGAGACGTGGATAGAGTCACTAGTTTAAGAGCTATGCTGGAAACAGCATAGCAAGTTTAAATAAGGCTAGTCCGTTATCAACTTGAAAAAGTGGCACCGAGTCGGTGCTTTTTT
4|sgABCB5_2|ABCB5	CAAAGGTCGGACTACAATCG	1	442	978	892	1	1	643	508	1	0	1254	703	3262	1585	1353	918	2745	340273	ABCB5	ABCB5	4|sg_hABCB5_02|ABCB5	ABCB5	ACCGCAAAGGTCGGACTACAATCGGTTTAAGAGCTATGCTGGAAACAGCATAGCAAGTTTAAATAAGGCTAGTCCGTTATCAACTTGAAAAAGTGGCACCGAGTCGGTGCTTTTTT
4|sgABCB5_3|ABCB5	GAAACCTTCGCAATAGCCCG	0	0	963	421	0	1376	128	363	1	1666	1143	521	0	0	439	1026	1621	340273	ABCB5	ABCB5	4|sg_hABCB5_03|ABCB5	ABCB5	ACCGGAAACCTTCGCAATAGCCCGGTTTAAGAGCTATGCTGGAAACAGCATAGCAAGTTTAAATAAGGCTAGTCCGTTATCAACTTGAAAAAGTGGCACCGAGTCGGTGCTTTTTT
4|sgABCB5_4|ABCB5	TTTGGATTGGCAGATCATGG	3291	1155	1511	1454	3	526	1074	989	0	0	1042	599	2211	2	1721	2187	3276	340273	ABCB5	ABCB5	4|sg_hABCB5_04|ABCB5	ABCB5	ACCGTTTGGATTGGCAGATCATGGGTTTAAGAGCTATGCTGGAAACAGCATAGCAAGTTTAAATAAGGCTAGTCCGTTATCAACTTGAAAAAGTGGCACCGAGTCGGTGCTTTTTT
4|sgABCB6_1|ABCB6	CGAAGTGGAACGCTATCGAG	2142	1	1623	801	1	432	606	1131	0	1682	1109	613	1	0	1041	1894	2954	10058	ABCB6	ABCB6	4|sg_hABCB6_01|ABCB6	ABCB6	ACCGCGAAGTGGAACGCTATCGAGGTTTAAGAGCTATGCTGGAAACAGCATAGCAAGTTTAAATAAGGCTAGTCCGTTATCAACTTGAAAAAGTGGCACCGAGTCGGTGCTTTTTT
4|sgABCB6_2|ABCB6	GCACGTAGGGAGAGATGCGA	5506	614	875	827	2	983	1193	693	0	0	994	565	1	1	1285	1081	3441	10058	ABCB6	ABCB6	4|sg_hABCB6_02|ABCB6	ABCB6	ACCGGCACGTAGGGAGAGATGCGAGTTTAAGAGCTATGCTGGAAACAGCATAGCAAGTTTAAATAAGGCTAGTCCGTTATCAACTTGAAAAAGTGGCACCGAGTCGGTGCTTTTTT
4|sgABCB6_3|ABCB6	GGAACGGGCACTCAATGTGT	3638	660	909	847	0	550	422	622	0	2141	1496	625	3770	1138	845	2788	2626	10058	ABCB6	ABCB6	4|sg_hABCB6_03|ABCB6	ABCB6	ACCGGGAACGGGCACTCAATGTGTGTTTAAGAGCTATGCTGGAAACAGCATAGCAAGTTTAAATAAGGCTAGTCCGTTATCAACTTGAAAAAGTGGCACCGAGTCGGTGCTTTTTT
4|sgABCB6_4|ABCB6	TAGGTGCCAAACCAATTGAG	1	0	850	746	5149	1647	752	527	0	0	699	342	3907	2	976	690	1922	10058	ABCB6	ABCB6	4|sg_hABCB6_04|ABCB6	ABCB6	ACCGTAGGTGCCAAACCAATTGAGGTTTAAGAGCTATGCTGGAAACAGCATAGCAAGTTTAAATAAGGCTAGTCCGTTATCAACTTGAAAAAGTGGCACCGAGTCGGTGCTTTTTT
4|sgABCB7_1|ABCB7	AGTCATTAAAAAGTATCACA	0	926	364	234	3	0	552	364	0	0	352	339	1	1358	381	348	1746	22	ABCB7	ABCB7	4|sg_hABCB7_01|ABCB7	ABCB7	ACCGAGTCATTAAAAAGTATCACAGTTTAAGAGCTATGCTGGAAACAGCATAGCAAGTTTAAATAAGGCTAGTCCGTTATCAACTTGAAAAAGTGGCACCGAGTCGGTGCTTTTTT
4|sgABCB7_2|ABCB7	CACACCACAGACAGCTACCG	1799	633	622	261	0	0	118	232	0	1832	351	141	0	1147	376	550	3741	22	ABCB7	ABCB7	4|sg_hABCB7_02|ABCB7	ABCB7	ACCGCACACCACAGACAGCTACCGGTTTAAGAGCTATGCTGGAAACAGCATAGCAAGTTTAAATAAGGCTAGTCCGTTATCAACTTGAAAAAGTGGCACCGAGTCGGTGCTTTTTT
4|sgABCB7_3|ABCB7	GATTAAATACCAAAGCACTC	0	0	440	176	0	0	330	182	0	0	224	82	0	0	520	165	1902	22	ABCB7	ABCB7	4|sg_hABCB7_03|ABCB7	ABCB7	ACCGGATTAAATACCAAAGCACTCGTTTAAGAGCTATGCTGGAAACAGCATAGCAAGTTTAAATAAGGCTAGTCCGTTATCAACTTGAAAAAGTGGCACCGAGTCGGTGCTTTTTT
4|sgABCB7_4|ABCB7	TCACAGTTGCAGTCACACGG	0	0	298	221	1534	0	215	290	0	5147	521	143	0	1586	542	305	5142	22	ABCB7	ABCB7	4|sg_hABCB7_04|ABCB7	ABCB7	ACCGTCACAGTTGCAGTCACACGGGTTTAAGAGCTATGCTGGAAACAGCATAGCAAGTTTAAATAAGGCTAGTCCGTTATCAACTTGAAAAAGTGGCACCGAGTCGGTGCTTTTTT
4|sgABCB8_1|ABCB8	AAGTACACAAGGGACCACGT	2821	1703	1484	1792	1895	590	740	1503	0	1	2393	1324	2	1886	1796	2913	5883	11194	ABCB8	ABCB8	4|sg_hABCB8_01|ABCB8	ABCB8	ACCGAAGTACACAAGGGACCACGTGTTTAAGAGCTATGCTGGAAACAGCATAGCAAGTTTAAATAAGGCTAGTCCGTTATCAACTTGAAAAAGTGGCACCGAGTCGGTGCTTTTTT
4|sgABCB8_2|ABCB8	CCTGCCCAAACAGGACAGAG	0	1520	1532	1465	1164	246	539	1539	0	2016	2848	1126	3	1950	2297	2464	4106	11194	ABCB8	ABCB8	4|sg_hABCB8_02|ABCB8	ABCB8	ACCGCCTGCCCAAACAGGACAGAGGTTTAAGAGCTATGCTGGAAACAGCATAGCAAGTTTAAATAAGGCTAGTCCGTTATCAACTTGAAAAAGTGGCACCGAGTCGGTGCTTTTTT
4|sgABCB8_3|ABCB8	CTTGGAACAAGGCGATGCCG	2731	2170	1121	1074	1442	958	1094	519	0	0	1224	805	0	5770	1553	1512	2883	11194	ABCB8	ABCB8	4|sg_hABCB8_03|ABCB8	ABCB8	ACCGCTTGGAACAAGGCGATGCCGGTTTAAGAGCTATGCTGGAAACAGCATAGCAAGTTTAAATAAGGCTAGTCCGTTATCAACTTGAAAAAGTGGCACCGAGTCGGTGCTTTTTT
4|sgABCB8_4|ABCB8	TCTTTGACGCCAATAAGACA	1368	0	508	712	0	397	359	657	0	0	573	360	801	2769	671	1005	1717	11194	ABCB8	ABCB8	4|sg_hABCB8_04|ABCB8	ABCB8	ACCGTCTTTGACGCCAATAAGACAGTTTAAGAGCTATGCTGGAAACAGCATAGCAAGTTTAAATAAGGCTAGTCCGTTATCAACTTGAAAAAGTGGCACCGAGTCGGTGCTTTTTT
4|sgABCB9_1|ABCB9	GCCCCAGACGTAGTACATGT	0	2223	932	724	1081	323	645	487	0	0	1005	524	1	0	946	1119	2945	23457	ABCB9	ABCB9	4|sg_hABCB9_01|ABCB9	ABCB9	ACCGGCCCCAGACGTAGTACATGTGTTTAAGAGCTATGCTGGAAACAGCATAGCAAGTTTAAATAAGGCTAGTCCGTTATCAACTTGAAAAAGTGGCACCGAGTCGGTGCTTTTTT
4|sgABCB9_2|ABCB9	TGGACACCATCATGATGATG	0	1409	932	828	1	1152	435	472	6630	2113	876	700	2643	0	733	1396	3247	23457	ABCB9	ABCB9	4|sg_hABCB9_02|ABCB9	ABCB9	ACCGTGGACACCATCATGATGATGGTTTAAGAGCTATGCTGGAAACAGCATAGCAAGTTTAAATAAGGCTAGTCCGTTATCAACTTGAAAAAGTGGCACCGAGTCGGTGCTTTTTT
4|sgABCB9_3|ABCB9	TGTCCTGGGAGATTGTATGG	2386	0	834	695	2	522	421	542	0	2106	538	445	2	3504	719	1576	2246	23457	ABCB9	ABCB9	4|sg_hABCB9_03|ABCB9	ABCB9	ACCGTGTCCTGGGAGATTGTATGGGTTTAAGAGCTATGCTGGAAACAGCATAGCAAGTTTAAATAAGGCTAGTCCGTTATCAACTTGAAAAAGTGGCACCGAGTCGGTGCTTTTTT
4|sgABCB9_4|ABCB9	TTTGCCGCAGGTATTCGGGG	0	2478	992	719	1365	940	230	568	1	1851	1103	432	5434	403	1346	882	2507	23457	ABCB9	ABCB9	4|sg_hABCB9_04|ABCB9	ABCB9	ACCGTTTGCCGCAGGTATTCGGGGGTTTAAGAGCTATGCTGGAAACAGCATAGCAAGTTTAAATAAGGCTAGTCCGTTATCAACTTGAAAAAGTGGCACCGAGTCGGTGCTTTTTT
4|sgABCC1_1|ABCC1	AAAATGTGATTGGCCCCAAG	2	1694	965	960	3	0	696	532	0	2111	913	639	7129	1004	944	724	2481	4363	ABCC1	ABCC1	4|sg_hABCC1_01|ABCC1	ABCC1	ACCGAAAATGTGATTGGCCCCAAGGTTTAAGAGCTATGCTGGAAACAGCATAGCAAGTTTAAATAAGGCTAGTCCGTTATCAACTTGAAAAAGTGGCACCGAGTCGGTGCTTTTTT
4|sgABCC1_2|ABCC1	AACCTGACAGCATCGAGCGA	1353	1291	645	703	1041	1088	128	628	7205	0	1404	302	0	999	811	1578	1515	4363	ABCC1	ABCC1	4|sg_hABCC1_02|ABCC1	ABCC1	ACCGAACCTGACAGCATCGAGCGAGTTTAAGAGCTATGCTGGAAACAGCATAGCAAGTTTAAATAAGGCTAGTCCGTTATCAACTTGAAAAAGTGGCACCGAGTCGGTGCTTTTTT
4|sgABCC1_3|ABCC1	AGTACACGGAAAGCTTGACC	0	1800	824	725	2	0	392	580	0	2254	1652	673	0	0	1497	1288	2533	4363	ABCC1	ABCC1	4|sg_hABCC1_03|ABCC1	ABCC1	ACCGAGTACACGGAAAGCTTGACCGTTTAAGAGCTATGCTGGAAACAGCATAGCAAGTTTAAATAAGGCTAGTCCGTTATCAACTTGAAAAAGTGGCACCGAGTCGGTGCTTTTTT
4|sgABCC1_4|ABCC1	TCTGCTTCGTCAGTGGCATG	3694	3797	2226	1913	12	1345	1563	1919	7769	5618	2602	1064	2	4705	2328	2322	5584	4363	ABCC1	ABCC1	4|sg_hABCC1_04|ABCC1	ABCC1	ACCGTCTGCTTCGTCAGTGGCATGGTTTAAGAGCTATGCTGGAAACAGCATAGCAAGTTTAAATAAGGCTAGTCCGTTATCAACTTGAAAAAGTGGCACCGAGTCGGTGCTTTTTT
4|sgABCC10_1|ABCC10	AAGGGTGTCACCCTTAGCGG	0	1461	759	537	0	592	911	196	0	0	522	272	1	1093	629	313	2399	89845	ABCC10	ABCC10	4|sg_hABCC10_01|ABCC10	ABCC10	ACCGAAGGGTGTCACCCTTAGCGGGTTTAAGAGCTATGCTGGAAACAGCATAGCAAGTTTAAATAAGGCTAGTCCGTTATCAACTTGAAAAAGTGGCACCGAGTCGGTGCTTTTTT
4|sgABCC10_2|ABCC10	CGTGTACCAAGCTTACTGGA	0	653	1293	902	1	0	955	836	8773	0	489	395	2	2039	986	1597	2576	89845	ABCC10	ABCC10	4|sg_hABCC10_02|ABCC10	ABCC10	ACCGCGTGTACCAAGCTTACTGGAGTTTAAGAGCTATGCTGGAAACAGCATAGCAAGTTTAAATAAGGCTAGTCCGTTATCAACTTGAAAAAGTGGCACCGAGTCGGTGCTTTTTT
4|sgABCC10_3|ABCC10	GGGCCCTGAGAATCCCAACA	1	0	1141	747	1021	260	872	1238	0	6649	1172	788	0	0	937	466	2684	89845	ABCC10	ABCC10	4|sg_hABCC10_03|ABCC10	ABCC10	ACCGGGGCCCTGAGAATCCCAACAGTTTAAGAGCTATGCTGGAAACAGCATAGCAAGTTTAAATAAGGCTAGTCCGTTATCAACTTGAAAAAGTGGCACCGAGTCGGTGCTTTTTT
4|sgABCC10_4|ABCC10	TGCACGTGTACCAAGCTTAC	0	573	563	662	0	557	241	456	0	0	539	312	0	2920	829	904	2220	89845	ABCC10	ABCC10	4|sg_hABCC10_04|ABCC10	ABCC10	ACCGTGCACGTGTACCAAGCTTACGTTTAAGAGCTATGCTGGAAACAGCATAGCAAGTTTAAATAAGGCTAGTCCGTTATCAACTTGAAAAAGTGGCACCGAGTCGGTGCTTTTTT
4|sgABCC11_1|ABCC11	AATACACATCACCTCAGGAG	0	1355	1010	715	1	0	610	624	5568	0	1499	746	1746	1342	1699	2737	3423	85320	ABCC11	ABCC11	4|sg_hABCC11_01|ABCC11	ABCC11	ACCGAATACACATCACCTCAGGAGGTTTAAGAGCTATGCTGGAAACAGCATAGCAAGTTTAAATAAGGCTAGTCCGTTATCAACTTGAAAAAGTGGCACCGAGTCGGTGCTTTTTT
4|sgABCC11_2|ABCC11	CAAAGACCAGAGCTTTGCTG	0	0	827	456	3	224	376	372	0	0	1201	330	0	1665	656	544	1620	85320	ABCC11	ABCC11	4|sg_hABCC11_02|ABCC11	ABCC11	ACCGCAAAGACCAGAGCTTTGCTGGTTTAAGAGCTATGCTGGAAACAGCATAGCAAGTTTAAATAAGGCTAGTCCGTTATCAACTTGAAAAAGTGGCACCGAGTCGGTGCTTTTTT
4|sgABCC11_3|ABCC11	GACGGTCGGAATAGACGGCG	0	1941	1417	1381	2	334	694	918	0	5556	1113	662	1	0	1847	1228	4391	85320	ABCC11	ABCC11	4|sg_hABCC11_03|ABCC11	ABCC11	ACCGGACGGTCGGAATAGACGGCGGTTTAAGAGCTATGCTGGAAACAGCATAGCAAGTTTAAATAAGGCTAGTCCGTTATCAACTTGAAAAAGTGGCACCGAGTCGGTGCTTTTTT
4|sgABCC11_4|ABCC11	TAAGCTTTGGATCATGAGCG	1	550	653	672	0	0	712	507	0	0	536	332	0	1648	518	836	2116	85320	ABCC11	ABCC11	4|sg_hABCC11_04|ABCC11	ABCC11	ACCGTAAGCTTTGGATCATGAGCGGTTTAAGAGCTATGCTGGAAACAGCATAGCAAGTTTAAATAAGGCTAGTCCGTTATCAACTTGAAAAAGTGGCACCGAGTCGGTGCTTTTTT
4|sgABCC12_1|ABCC12	AAAGACCATTAGGATCGGGA	1	0	739	427	2	1064	761	667	0	0	1552	743	2478	4107	1161	1279	2395	94160	ABCC12	ABCC12	4|sg_hABCC12_01|ABCC12	ABCC12	ACCGAAAGACCATTAGGATCGGGAGTTTAAGAGCTATGCTGGAAACAGCATAGCAAGTTTAAATAAGGCTAGTCCGTTATCAACTTGAAAAAGTGGCACCGAGTCGGTGCTTTTTT
4|sgABCC12_2|ABCC12	ACGTACATTAAGGCTTCTGG	8117	1680	2085	1828	3083	746	2250	1635	0	2021	2110	1306	12510	10	2056	2822	5581	94160	ABCC12	ABCC12	4|sg_hABCC12_02|ABCC12	ABCC12	ACCGACGTACATTAAGGCTTCTGGGTTTAAGAGCTATGCTGGAAACAGCATAGCAAGTTTAAATAAGGCTAGTCCGTTATCAACTTGAAAAAGTGGCACCGAGTCGGTGCTTTTTT
4|sgABCC12_3|ABCC12	GAGTCATATGTCGACAATGG	0	1260	1056	479	0	231	849	790	0	4097	899	626	2317	2008	965	506	3461	94160	ABCC12	ABCC12	4|sg_hABCC12_03|ABCC12	ABCC12	ACCGGAGTCATATGTCGACAATGGGTTTAAGAGCTATGCTGGAAACAGCATAGCAAGTTTAAATAAGGCTAGTCCGTTATCAACTTGAAAAAGTGGCACCGAGTCGGTGCTTTTTT
4|sgABCC12_4|ABCC12	GCCAACCCAGACTTTCCCAG	0	20	749	588	1	0	542	566	0	0	1137	523	1	521	464	1399	2167	94160	ABCC12	ABCC12	4|sg_hABCC12_04|ABCC12	ABCC12	ACCGGCCAACCCAGACTTTCCCAGGTTTAAGAGCTATGCTGGAAACAGCATAGCAAGTTTAAATAAGGCTAGTCCGTTATCAACTTGAAAAAGTGGCACCGAGTCGGTGCTTTTTT
4|sgABCC2_1|ABCC2	CAGAATTCATCACAAACGCA	0	1796	1164	1626	2	266	570	921	1	3376	2241	565	3	2270	2491	1909	3338	1244	ABCC2	ABCC2	4|sg_hABCC2_01|ABCC2	ABCC2	ACCGCAGAATTCATCACAAACGCAGTTTAAGAGCTATGCTGGAAACAGCATAGCAAGTTTAAATAAGGCTAGTCCGTTATCAACTTGAAAAAGTGGCACCGAGTCGGTGCTTTTTT
4|sgABCC2_2|ABCC2	CAGGGTATAAATCTTAGTGG	0	0	737	549	1	778	484	845	1	0	941	517	0	0	514	510	2212	1244	ABCC2	ABCC2	4|sg_hABCC2_02|ABCC2	ABCC2	ACCGCAGGGTATAAATCTTAGTGGGTTTAAGAGCTATGCTGGAAACAGCATAGCAAGTTTAAATAAGGCTAGTCCGTTATCAACTTGAAAAAGTGGCACCGAGTCGGTGCTTTTTT
4|sgABCC2_3|ABCC2	CATTATGGCAGGCCAACTTG	1	3032	1416	1332	1436	605	255	1529	15854	2525	2530	1145	5335	4251	2450	4403	6171	1244	ABCC2	ABCC2	4|sg_hABCC2_03|ABCC2	ABCC2	ACCGCATTATGGCAGGCCAACTTGGTTTAAGAGCTATGCTGGAAACAGCATAGCAAGTTTAAATAAGGCTAGTCCGTTATCAACTTGAAAAAGTGGCACCGAGTCGGTGCTTTTTT
4|sgABCC2_4|ABCC2	GATTGGTATATCGAACAGCA	0	1540	913	864	2	1476	919	776	0	1270	1574	490	1	5504	526	1680	2564	1244	ABCC2	ABCC2	4|sg_hABCC2_04|ABCC2	ABCC2	ACCGGATTGGTATATCGAACAGCAGTTTAAGAGCTATGCTGGAAACAGCATAGCAAGTTTAAATAAGGCTAGTCCGTTATCAACTTGAAAAAGTGGCACCGAGTCGGTGCTTTTTT
4|sgABCC3_1|ABCC3	CCACGTACACGTACACCCAG	3628	537	2545	2261	2	1284	1246	1696	1	0	1472	1852	1	4811	3070	2521	5769	8714	ABCC3	ABCC3	4|sg_hABCC3_01|ABCC3	ABCC3	ACCGCCACGTACACGTACACCCAGGTTTAAGAGCTATGCTGGAAACAGCATAGCAAGTTTAAATAAGGCTAGTCCGTTATCAACTTGAAAAAGTGGCACCGAGTCGGTGCTTTTTT
4|sgABCC3_2|ABCC3	GCAGGGCGTACAGTCTTCGG	0	1022	1365	1191	639	0	927	962	0	1	2123	1026	3210	5615	2343	2056	4926	8714	ABCC3	ABCC3	4|sg_hABCC3_02|ABCC3	ABCC3	ACCGGCAGGGCGTACAGTCTTCGGGTTTAAGAGCTATGCTGGAAACAGCATAGCAAGTTTAAATAAGGCTAGTCCGTTATCAACTTGAAAAAGTGGCACCGAGTCGGTGCTTTTTT
4|sgABCC3_3|ABCC3	GGCCACATGAGAGTCCACCG	4363	2133	938	895	4286	524	990	1179	0	0	829	723	1	2526	1017	568	2521	8714	ABCC3	ABCC3	4|sg_hABCC3_03|ABCC3	ABCC3	ACCGGGCCACATGAGAGTCCACCGGTTTAAGAGCTATGCTGGAAACAGCATAGCAAGTTTAAATAAGGCTAGTCCGTTATCAACTTGAAAAAGTGGCACCGAGTCGGTGCTTTTTT
4|sgABCC3_4|ABCC3	TGAACCACCAGAAAAACAGG	0	4109	820	740	3	391	267	772	28105	1	1219	442	3194	4489	1273	1407	2764	8714	ABCC3	ABCC3	4|sg_hABCC3_04|ABCC3	ABCC3	ACCGTGAACCACCAGAAAAACAGGGTTTAAGAGCTATGCTGGAAACAGCATAGCAAGTTTAAATAAGGCTAGTCCGTTATCAACTTGAAAAAGTGGCACCGAGTCGGTGCTTTTTT
4|sgABCC4_1|ABCC4	AAGCACGGGTAAACCTTGCA	1	1493	2024	1706	1	1283	876	1959	0	0	1722	1260	2353	5150	2444	2134	5516	10257	ABCC4	ABCC4	4|sg_hABCC4_01|ABCC4	ABCC4	ACCGAAGCACGGGTAAACCTTGCAGTTTAAGAGCTATGCTGGAAACAGCATAGCAAGTTTAAATAAGGCTAGTCCGTTATCAACTTGAAAAAGTGGCACCGAGTCGGTGCTTTTTT
4|sgABCC4_2|ABCC4	CAGATTGACTATCTGGCCTG	0	1661	1458	1392	1535	708	1428	1161	6516	0	1171	1057	2179	2	1368	2172	3958	10257	ABCC4	ABCC4	4|sg_hABCC4_02|ABCC4	ABCC4	ACCGCAGATTGACTATCTGGCCTGGTTTAAGAGCTATGCTGGAAACAGCATAGCAAGTTTAAATAAGGCTAGTCCGTTATCAACTTGAAAAAGTGGCACCGAGTCGGTGCTTTTTT
4|sgABCC4_3|ABCC4	GAAGGTACGATTCCTTAGTG	0	1128	956	892	0	1028	471	993	0	0	826	300	1820	1546	1043	1595	2619	10257	ABCC4	ABCC4	4|sg_hABCC4_03|ABCC4	ABCC4	ACCGGAAGGTACGATTCCTTAGTGGTTTAAGAGCTATGCTGGAAACAGCATAGCAAGTTTAAATAAGGCTAGTCCGTTATCAACTTGAAAAAGTGGCACCGAGTCGGTGCTTTTTT
4|sgABCC4_4|ABCC4	GCGTCACTGCCACGAACACG	3513	2006	2315	2250	4035	837	1754	1471	0	3362	1757	1129	3354	3324	1900	1817	4609	10257	ABCC4	ABCC4	4|sg_hABCC4_04|ABCC4	ABCC4	ACCGGCGTCACTGCCACGAACACGGTTTAAGAGCTATGCTGGAAACAGCATAGCAAGTTTAAATAAGGCTAGTCCGTTATCAACTTGAAAAAGTGGCACCGAGTCGGTGCTTTTTT
4|sgABCC5_1|ABCC5	TACGGAAAGAGGCACCCATG	4062	710	1249	1179	814	1075	823	601	0	1254	1866	1357	2	989	1318	3101	3036	10057	ABCC5	ABCC5	4|sg_hABCC5_01|ABCC5	ABCC5	ACCGTACGGAAAGAGGCACCCATGGTTTAAGAGCTATGCTGGAAACAGCATAGCAAGTTTAAATAAGGCTAGTCCGTTATCAACTTGAAAAAGTGGCACCGAGTCGGTGCTTTTTT
4|sgABCC5_2|ABCC5	TGAAAAGGGCCATAATAACC	2146	1770	761	726	3910	515	466	668	0	0	815	473	3615	5	824	1093	2482	10057	ABCC5	ABCC5	4|sg_hABCC5_02|ABCC5	ABCC5	ACCGTGAAAAGGGCCATAATAACCGTTTAAGAGCTATGCTGGAAACAGCATAGCAAGTTTAAATAAGGCTAGTCCGTTATCAACTTGAAAAAGTGGCACCGAGTCGGTGCTTTTTT
4|sgABCC5_3|ABCC5	TGTTAAGACTAGAGAGACTG	0	0	531	513	1	313	182	375	0	0	612	612	0	1602	749	507	1650	10057	ABCC5	ABCC5	4|sg_hABCC5_03|ABCC5	ABCC5	ACCGTGTTAAGACTAGAGAGACTGGTTTAAGAGCTATGCTGGAAACAGCATAGCAAGTTTAAATAAGGCTAGTCCGTTATCAACTTGAAAAAGTGGCACCGAGTCGGTGCTTTTTT
4|sgABCC5_4|ABCC5	TTTATTCATAGAAATCCGCG	0	604	934	803	3306	655	865	569	0	0	1287	405	0	0	393	1067	3562	10057	ABCC5	ABCC5	4|sg_hABCC5_04|ABCC5	ABCC5	ACCGTTTATTCATAGAAATCCGCGGTTTAAGAGCTATGCTGGAAACAGCATAGCAAGTTTAAATAAGGCTAGTCCGTTATCAACTTGAAAAAGTGGCACCGAGTCGGTGCTTTTTT
4|sgABCC6_1|ABCC6	ACTATGATCCAATCAGCCTG	0	597	722	944	1	780	752	505	23125	1	461	333	5578	3	723	528	2466	368	ABCC6	ABCC6	4|sg_hABCC6_01|ABCC6	ABCC6	ACCGACTATGATCCAATCAGCCTGGTTTAAGAGCTATGCTGGAAACAGCATAGCAAGTTTAAATAAGGCTAGTCCGTTATCAACTTGAAAAAGTGGCACCGAGTCGGTGCTTTTTT
4|sgABCC6_2|ABCC6	CAGACCACGATCCAGACGAG	0	799	1311	1429	1	478	812	920	0	0	1324	334	0	1104	1123	989	4310	368	ABCC6	ABCC6	4|sg_hABCC6_02|ABCC6	ABCC6	ACCGCAGACCACGATCCAGACGAGGTTTAAGAGCTATGCTGGAAACAGCATAGCAAGTTTAAATAAGGCTAGTCCGTTATCAACTTGAAAAAGTGGCACCGAGTCGGTGCTTTTTT
4|sgABCC6_3|ABCC6	GAGAACTGTGAGAGTCACAA	0	2416	1276	795	2	303	1094	1101	0	3415	918	531	2	3159	1398	1209	3075	368	ABCC6	ABCC6	4|sg_hABCC6_03|ABCC6	ABCC6	ACCGGAGAACTGTGAGAGTCACAAGTTTAAGAGCTATGCTGGAAACAGCATAGCAAGTTTAAATAAGGCTAGTCCGTTATCAACTTGAAAAAGTGGCACCGAGTCGGTGCTTTTTT
4|sgABCC6_4|ABCC6	GGACAGCATCCAATACGGCA	0	2117	621	849	3069	697	449	457	0	2098	722	949	2	0	1200	1684	2196	368	ABCC6	ABCC6	4|sg_hABCC6_04|ABCC6	ABCC6	ACCGGGACAGCATCCAATACGGCAGTTTAAGAGCTATGCTGGAAACAGCATAGCAAGTTTAAATAAGGCTAGTCCGTTATCAACTTGAAAAAGTGGCACCGAGTCGGTGCTTTTTT
4|sgABCC8_1|ABCC8	CAGACCAACGAGATGCTCCG	0	3000	1205	843	0	456	171	636	0	0	1814	493	0	3450	862	1032	2781	6833	ABCC8	ABCC8	4|sg_hABCC8_01|ABCC8	ABCC8	ACCGCAGACCAACGAGATGCTCCGGTTTAAGAGCTATGCTGGAAACAGCATAGCAAGTTTAAATAAGGCTAGTCCGTTATCAACTTGAAAAAGTGGCACCGAGTCGGTGCTTTTTT
4|sgABCC8_2|ABCC8	CTACCGTCAAAGCTCTAGTG	4438	2359	1851	1846	1	757	1086	885	0	0	1709	765	0	2624	1671	2486	4219	6833	ABCC8	ABCC8	4|sg_hABCC8_02|ABCC8	ABCC8	ACCGCTACCGTCAAAGCTCTAGTGGTTTAAGAGCTATGCTGGAAACAGCATAGCAAGTTTAAATAAGGCTAGTCCGTTATCAACTTGAAAAAGTGGCACCGAGTCGGTGCTTTTTT
4|sgABCC8_3|ABCC8	GATGTTGTGATAGTAGACCA	0	0	1126	747	0	286	1434	540	0	3351	742	755	4206	5	1200	1251	2162	6833	ABCC8	ABCC8	4|sg_hABCC8_03|ABCC8	ABCC8	ACCGGATGTTGTGATAGTAGACCAGTTTAAGAGCTATGCTGGAAACAGCATAGCAAGTTTAAATAAGGCTAGTCCGTTATCAACTTGAAAAAGTGGCACCGAGTCGGTGCTTTTTT
4|sgABCC8_4|ABCC8	TCAACGCCAGCGAATCAGTG	0	235	660	783	692	0	224	740	0	1	1358	918	5	1972	1632	1610	2486	6833	ABCC8	ABCC8	4|sg_hABCC8_04|ABCC8	ABCC8	ACCGTCAACGCCAGCGAATCAGTGGTTTAAGAGCTATGCTGGAAACAGCATAGCAAGTTTAAATAAGGCTAGTCCGTTATCAACTTGAAAAAGTGGCACCGAGTCGGTGCTTTTTT
4|sgABCC9_1|ABCC9	AGAGAGGAAAACTCTCCGAC	0	585	757	662	1	0	826	693	0	1	1557	789	2264	2	423	1366	2735	10060	ABCC9	ABCC9	4|sg_hABCC9_01|ABCC9	ABCC9	ACCGAGAGAGGAAAACTCTCCGACGTTTAAGAGCTATGCTGGAAACAGCATAGCAAGTTTAAATAAGGCTAGTCCGTTATCAACTTGAAAAAGTGGCACCGAGTCGGTGCTTTTTT
4|sgABCC9_2|ABCC9	ATACACTATCGATGTTGTAG	2934	0	789	608	1	514	1809	541	0	0	925	276	0	1482	418	710	2513	10060	ABCC9	ABCC9	4|sg_hABCC9_02|ABCC9	ABCC9	ACCGATACACTATCGATGTTGTAGGTTTAAGAGCTATGCTGGAAACAGCATAGCAAGTTTAAATAAGGCTAGTCCGTTATCAACTTGAAAAAGTGGCACCGAGTCGGTGCTTTTTT
4|sgABCC9_3|ABCC9	GACTGCAAATCTGACCACCG	6606	4645	2299	1476	5122	289	1237	1349	0	0	1478	963	1	0	1282	2398	4477	10060	ABCC9	ABCC9	4|sg_hABCC9_03|ABCC9	ABCC9	ACCGGACTGCAAATCTGACCACCGGTTTAAGAGCTATGCTGGAAACAGCATAGCAAGTTTAAATAAGGCTAGTCCGTTATCAACTTGAAAAAGTGGCACCGAGTCGGTGCTTTTTT
4|sgABCC9_4|ABCC9	TAAAGTACTGAATTGGCGCA	0	435	1112	1077	2	189	1572	1157	9876	1	2541	812	1	0	1688	2252	4047	10060	ABCC9	ABCC9	4|sg_hABCC9_04|ABCC9	ABCC9	ACCGTAAAGTACTGAATTGGCGCAGTTTAAGAGCTATGCTGGAAACAGCATAGCAAGTTTAAATAAGGCTAGTCCGTTATCAACTTGAAAAAGTGGCACCGAGTCGGTGCTTTTTT
4|sgABCD1_1|ABCD1	AGTTCCTCATGAAGTATGTG	1133	1852	1354	1146	1	221	746	831	0	3842	1311	692	5	1605	1296	758	3015	215	ABCD1	ABCD1	4|sg_hABCD1_01|ABCD1	ABCD1	ACCGAGTTCCTCATGAAGTATGTGGTTTAAGAGCTATGCTGGAAACAGCATAGCAAGTTTAAATAAGGCTAGTCCGTTATCAACTTGAAAAAGTGGCACCGAGTCGGTGCTTTTTT
4|sgABCD1_2|ABCD1	CTACATGCACTCGCGTGTGG	2772	941	795	559	1980	798	813	516	1	2641	563	300	7272	2612	863	824	2569	215	ABCD1	ABCD1	4|sg_hABCD1_02|ABCD1	ABCD1	ACCGCTACATGCACTCGCGTGTGGGTTTAAGAGCTATGCTGGAAACAGCATAGCAAGTTTAAATAAGGCTAGTCCGTTATCAACTTGAAAAAGTGGCACCGAGTCGGTGCTTTTTT
4|sgABCD1_3|ABCD1	GATCATGTCGTCGTACAAGG	6137	1107	1783	1528	803	997	1345	1252	0	1	2440	788	2	2941	1926	2090	4886	215	ABCD1	ABCD1	4|sg_hABCD1_03|ABCD1	ABCD1	ACCGGATCATGTCGTCGTACAAGGGTTTAAGAGCTATGCTGGAAACAGCATAGCAAGTTTAAATAAGGCTAGTCCGTTATCAACTTGAAAAAGTGGCACCGAGTCGGTGCTTTTTT
4|sgABCD1_4|ABCD1	GGCCACATACACCGACAGGA	0	375	1111	1052	954	924	612	1145	0	1	1554	894	0	1	1035	1608	3741	215	ABCD1	ABCD1	4|sg_hABCD1_04|ABCD1	ABCD1	ACCGGGCCACATACACCGACAGGAGTTTAAGAGCTATGCTGGAAACAGCATAGCAAGTTTAAATAAGGCTAGTCCGTTATCAACTTGAAAAAGTGGCACCGAGTCGGTGCTTTTTT
4|sgABCD2_1|ABCD2	ATTACCTCTCAGTGACACAT	0	620	2015	1496	1514	369	1837	1559	9130	4043	2853	1349	2119	1258	2026	1669	5698	225	ABCD2	ABCD2	4|sg_hABCD2_01|ABCD2	ABCD2	ACCGATTACCTCTCAGTGACACATGTTTAAGAGCTATGCTGGAAACAGCATAGCAAGTTTAAATAAGGCTAGTCCGTTATCAACTTGAAAAAGTGGCACCGAGTCGGTGCTTTTTT
4|sgABCD2_2|ABCD2	CCCTGACCAATCTCTTACGG	0	4447	1000	983	0	823	687	726	0	0	560	529	1	0	952	351	3101	225	ABCD2	ABCD2	4|sg_hABCD2_02|ABCD2	ABCD2	ACCGCCCTGACCAATCTCTTACGGGTTTAAGAGCTATGCTGGAAACAGCATAGCAAGTTTAAATAAGGCTAGTCCGTTATCAACTTGAAAAAGTGGCACCGAGTCGGTGCTTTTTT
4|sgABCD2_3|ABCD2	CCTTATTGCACTGTTGACGA	0	1496	824	433	1	358	189	519	0	4025	740	321	1	3979	666	635	1865	225	ABCD2	ABCD2	4|sg_hABCD2_03|ABCD2	ABCD2	ACCGCCTTATTGCACTGTTGACGAGTTTAAGAGCTATGCTGGAAACAGCATAGCAAGTTTAAATAAGGCTAGTCCGTTATCAACTTGAAAAAGTGGCACCGAGTCGGTGCTTTTTT
4|sgABCD2_4|ABCD2	CTGGAGCTGATGCTATTGAA	0	4196	900	736	0	0	447	592	0	3002	701	602	1	0	908	1518	2116	225	ABCD2	ABCD2	4|sg_hABCD2_04|ABCD2	ABCD2	ACCGCTGGAGCTGATGCTATTGAAGTTTAAGAGCTATGCTGGAAACAGCATAGCAAGTTTAAATAAGGCTAGTCCGTTATCAACTTGAAAAAGTGGCACCGAGTCGGTGCTTTTTT
4|sgABCD3_1|ABCD3	AATTAAACTTACAAGAGGCA	0	920	881	841	0	0	553	606	0	1201	775	429	0	4044	1014	1051	2501	5825	ABCD3	ABCD3	4|sg_hABCD3_01|ABCD3	ABCD3	ACCGAATTAAACTTACAAGAGGCAGTTTAAGAGCTATGCTGGAAACAGCATAGCAAGTTTAAATAAGGCTAGTCCGTTATCAACTTGAAAAAGTGGCACCGAGTCGGTGCTTTTTT
4|sgABCD3_2|ABCD3	ACTCGACTTCGAAGACCCAT	1332	1	929	983	1205	249	258	268	0	0	1262	453	3857	1749	1343	2051	2400	5825	ABCD3	ABCD3	4|sg_hABCD3_02|ABCD3	ABCD3	ACCGACTCGACTTCGAAGACCCATGTTTAAGAGCTATGCTGGAAACAGCATAGCAAGTTTAAATAAGGCTAGTCCGTTATCAACTTGAAAAAGTGGCACCGAGTCGGTGCTTTTTT
4|sgABCD3_3|ABCD3	TGGCAAATATGAGCGCACAA	0	953	1266	1113	2305	872	829	576	0	1310	1247	931	0	1	872	1475	2985	5825	ABCD3	ABCD3	4|sg_hABCD3_03|ABCD3	ABCD3	ACCGTGGCAAATATGAGCGCACAAGTTTAAGAGCTATGCTGGAAACAGCATAGCAAGTTTAAATAAGGCTAGTCCGTTATCAACTTGAAAAAGTGGCACCGAGTCGGTGCTTTTTT
4|sgABCD3_4|ABCD3	TGTGTACTCTTGAGATGTCG	3846	0	402	344	0	0	652	459	0	0	393	375	0	1564	808	565	1842	5825	ABCD3	ABCD3	4|sg_hABCD3_04|ABCD3	ABCD3	ACCGTGTGTACTCTTGAGATGTCGGTTTAAGAGCTATGCTGGAAACAGCATAGCAAGTTTAAATAAGGCTAGTCCGTTATCAACTTGAAAAAGTGGCACCGAGTCGGTGCTTTTTT
4|sgABCD4_1|ABCD4	AGCCACATCTGAGAGCGTCG	0	1140	691	669	0	303	380	490	0	0	748	225	1738	1	435	585	2427	5826	ABCD4	ABCD4	4|sg_hABCD4_01|ABCD4	ABCD4	ACCGAGCCACATCTGAGAGCGTCGGTTTAAGAGCTATGCTGGAAACAGCATAGCAAGTTTAAATAAGGCTAGTCCGTTATCAACTTGAAAAAGTGGCACCGAGTCGGTGCTTTTTT
4|sgABCD4_2|ABCD4	GATCCCCAGTCAGTACTATG	0	331	1067	478	0	565	1120	558	8147	1730	1003	529	1	1874	874	1029	2375	5826	ABCD4	ABCD4	4|sg_hABCD4_02|ABCD4	ABCD4	ACCGGATCCCCAGTCAGTACTATGGTTTAAGAGCTATGCTGGAAACAGCATAGCAAGTTTAAATAAGGCTAGTCCGTTATCAACTTGAAAAAGTGGCACCGAGTCGGTGCTTTTTT
4|sgABCD4_3|ABCD4	GTAGTAGACGAGGGTGAACG	4288	1352	1905	1312	2433	478	1546	1049	0	0	2199	890	0	1	1977	3149	5830	5826	ABCD4	ABCD4	4|sg_hABCD4_03|ABCD4	ABCD4	ACCGGTAGTAGACGAGGGTGAACGGTTTAAGAGCTATGCTGGAAACAGCATAGCAAGTTTAAATAAGGCTAGTCCGTTATCAACTTGAAAAAGTGGCACCGAGTCGGTGCTTTTTT
4|sgABCD4_4|ABCD4	TTGCGATGACAACGTAACTC	0	0	499	362	0	664	470	500	0	0	735	285	0	0	781	703	2152	5826	ABCD4	ABCD4	4|sg_hABCD4_04|ABCD4	ABCD4	ACCGTTGCGATGACAACGTAACTCGTTTAAGAGCTATGCTGGAAACAGCATAGCAAGTTTAAATAAGGCTAGTCCGTTATCAACTTGAAAAAGTGGCACCGAGTCGGTGCTTTTTT
4|sgABCE1_1|ABCE1	AGTTGTCCTGTAGTTCGAAT	0	742	415	180	0	114	313	221	0	0	445	271	0	1031	402	677	1963	6059	ABCE1	ABCE1	4|sg_hABCE1_01|ABCE1	ABCE1	ACCGAGTTGTCCTGTAGTTCGAATGTTTAAGAGCTATGCTGGAAACAGCATAGCAAGTTTAAATAAGGCTAGTCCGTTATCAACTTGAAAAAGTGGCACCGAGTCGGTGCTTTTTT
4|sgABCE1_2|ABCE1	CAATTGATAAGGCGCCAAAG	4881	0	125	169	0	0	206	69	0	0	348	200	5621	4	323	1	2247	6059	ABCE1	ABCE1	4|sg_hABCE1_02|ABCE1	ABCE1	ACCGCAATTGATAAGGCGCCAAAGGTTTAAGAGCTATGCTGGAAACAGCATAGCAAGTTTAAATAAGGCTAGTCCGTTATCAACTTGAAAAAGTGGCACCGAGTCGGTGCTTTTTT
4|sgABCE1_3|ABCE1	CCAAAACTTCACCTGGACGA	0	14	227	377	0	58	153	82	0	2532	170	100	0	0	345	120	1853	6059	ABCE1	ABCE1	4|sg_hABCE1_03|ABCE1	ABCE1	ACCGCCAAAACTTCACCTGGACGAGTTTAAGAGCTATGCTGGAAACAGCATAGCAAGTTTAAATAAGGCTAGTCCGTTATCAACTTGAAAAAGTGGCACCGAGTCGGTGCTTTTTT
4|sgABCE1_4|ABCE1	TTTCAGATATATCATTGTGG	3198	0	322	227	0	409	13	164	0	0	212	127	2613	5	139	145	1602	6059	ABCE1	ABCE1	4|sg_hABCE1_04|ABCE1	ABCE1	ACCGTTTCAGATATATCATTGTGGGTTTAAGAGCTATGCTGGAAACAGCATAGCAAGTTTAAATAAGGCTAGTCCGTTATCAACTTGAAAAAGTGGCACCGAGTCGGTGCTTTTTT
4|sgABCF1_1|ABCF1	CTGCAGAGGCCAAAGCACGG	3575	0	467	419	0	476	201	218	0	0	316	225	8263	1976	977	1446	4433	23	ABCF1	ABCF1	4|sg_hABCF1_01|ABCF1	ABCF1	ACCGCTGCAGAGGCCAAAGCACGGGTTTAAGAGCTATGCTGGAAACAGCATAGCAAGTTTAAATAAGGCTAGTCCGTTATCAACTTGAAAAAGTGGCACCGAGTCGGTGCTTTTTT
4|sgABCF1_2|ABCF1	GATGGAGTATGAGCGCCAAG	0	0	457	324	0	0	487	119	0	0	916	329	1999	4	813	270	2306	23	ABCF1	ABCF1	4|sg_hABCF1_02|ABCF1	ABCF1	ACCGGATGGAGTATGAGCGCCAAGGTTTAAGAGCTATGCTGGAAACAGCATAGCAAGTTTAAATAAGGCTAGTCCGTTATCAACTTGAAAAAGTGGCACCGAGTCGGTGCTTTTTT
4|sgABCF1_3|ABCF1	GCAACACATCAATGTTGGGA	3045	2132	449	352	0	244	412	267	0	0	241	187	0	2113	482	587	2556	23	ABCF1	ABCF1	4|sg_hABCF1_03|ABCF1	ABCF1	ACCGGCAACACATCAATGTTGGGAGTTTAAGAGCTATGCTGGAAACAGCATAGCAAGTTTAAATAAGGCTAGTCCGTTATCAACTTGAAAAAGTGGCACCGAGTCGGTGCTTTTTT
4|sgABCF1_4|ABCF1	TGTAATTGCCCCTATAGTAG	2	0	199	167	0	0	174	108	0	1	68	292	0	0	226	103	1674	23	ABCF1	ABCF1	4|sg_hABCF1_04|ABCF1	ABCF1	ACCGTGTAATTGCCCCTATAGTAGGTTTAAGAGCTATGCTGGAAACAGCATAGCAAGTTTAAATAAGGCTAGTCCGTTATCAACTTGAAAAAGTGGCACCGAGTCGGTGCTTTTTT
4|sgABCF2_1|ABCF2	AACCAATGAGGCCATAACGA	0	580	921	1066	1	0	442	715	0	4085	1317	278	2	2012	657	2383	2928	10061	ABCF2	ABCF2	4|sg_hABCF2_01|ABCF2	ABCF2	ACCGAACCAATGAGGCCATAACGAGTTTAAGAGCTATGCTGGAAACAGCATAGCAAGTTTAAATAAGGCTAGTCCGTTATCAACTTGAAAAAGTGGCACCGAGTCGGTGCTTTTTT
4|sgABCF2_2|ABCF2	ATGATCAGTACGTGAAGACG	0	428	727	1324	1	1357	312	1050	0	1910	555	456	587	913	1185	1292	3275	10061	ABCF2	ABCF2	4|sg_hABCF2_02|ABCF2	ABCF2	ACCGATGATCAGTACGTGAAGACGGTTTAAGAGCTATGCTGGAAACAGCATAGCAAGTTTAAATAAGGCTAGTCCGTTATCAACTTGAAAAAGTGGCACCGAGTCGGTGCTTTTTT
4|sgABCF2_3|ABCF2	CAGTCCATGCAAGATCCGCG	0	1367	1358	1186	1665	894	799	710	0	1382	1653	616	1114	1	1461	1227	3919	10061	ABCF2	ABCF2	4|sg_hABCF2_03|ABCF2	ABCF2	ACCGCAGTCCATGCAAGATCCGCGGTTTAAGAGCTATGCTGGAAACAGCATAGCAAGTTTAAATAAGGCTAGTCCGTTATCAACTTGAAAAAGTGGCACCGAGTCGGTGCTTTTTT
4|sgABCF2_4|ABCF2	GGGTCGTGAGCGATAAGGTG	1673	26	1369	1325	2	248	409	867	0	592	846	569	0	1376	1033	1185	3578	10061	ABCF2	ABCF2	4|sg_hABCF2_04|ABCF2	ABCF2	ACCGGGGTCGTGAGCGATAAGGTGGTTTAAGAGCTATGCTGGAAACAGCATAGCAAGTTTAAATAAGGCTAGTCCGTTATCAACTTGAAAAAGTGGCACCGAGTCGGTGCTTTTTT
4|sgABCF3_1|ABCF3	ACTTCCAGGACTGCTAAAGA	0	877	535	522	1	0	330	516	0	1489	982	472	1	2109	1560	1907	1832	55324	ABCF3	ABCF3	4|sg_hABCF3_01|ABCF3	ABCF3	ACCGACTTCCAGGACTGCTAAAGAGTTTAAGAGCTATGCTGGAAACAGCATAGCAAGTTTAAATAAGGCTAGTCCGTTATCAACTTGAAAAAGTGGCACCGAGTCGGTGCTTTTTT
4|sgABCF3_2|ABCF3	CAGCGGCTAGATGGTTACCG	0	442	518	708	0	0	732	425	0	1	2015	368	2	0	967	846	2786	55324	ABCF3	ABCF3	4|sg_hABCF3_02|ABCF3	ABCF3	ACCGCAGCGGCTAGATGGTTACCGGTTTAAGAGCTATGCTGGAAACAGCATAGCAAGTTTAAATAAGGCTAGTCCGTTATCAACTTGAAAAAGTGGCACCGAGTCGGTGCTTTTTT
4|sgABCF3_3|ABCF3	GCAGAGTGTTGTACATGCGC	2208	0	484	801	0	0	293	206	0	0	251	288	0	0	990	1351	2110	55324	ABCF3	ABCF3	4|sg_hABCF3_03|ABCF3	ABCF3	ACCGGCAGAGTGTTGTACATGCGCGTTTAAGAGCTATGCTGGAAACAGCATAGCAAGTTTAAATAAGGCTAGTCCGTTATCAACTTGAAAAAGTGGCACCGAGTCGGTGCTTTTTT
4|sgABCF3_4|ABCF3	TGCGAGAGGATTTGCTACGG	2056	0	988	627	198	225	462	894	0	841	794	590	1	668	856	1508	2247	55324	ABCF3	ABCF3	4|sg_hABCF3_04|ABCF3	ABCF3	ACCGTGCGAGAGGATTTGCTACGGGTTTAAGAGCTATGCTGGAAACAGCATAGCAAGTTTAAATAAGGCTAGTCCGTTATCAACTTGAAAAAGTGGCACCGAGTCGGTGCTTTTTT
4|sgABCG1_1|ABCG1	ATGAAAGGGCTCGCTCAAGG	3443	1149	738	717	3566	411	546	489	0	0	762	289	1337	1	918	2295	2269	9619	ABCG1	ABCG1	4|sg_hABCG1_01|ABCG1	ABCG1	ACCGATGAAAGGGCTCGCTCAAGGGTTTAAGAGCTATGCTGGAAACAGCATAGCAAGTTTAAATAAGGCTAGTCCGTTATCAACTTGAAAAAGTGGCACCGAGTCGGTGCTTTTTT
4|sgABCG1_2|ABCG1	CTTCAGGAACCGAATAGGAA	0	1840	1697	957	1	895	830	696	0	0	1721	919	1	1264	1585	2324	4296	9619	ABCG1	ABCG1	4|sg_hABCG1_02|ABCG1	ABCG1	ACCGCTTCAGGAACCGAATAGGAAGTTTAAGAGCTATGCTGGAAACAGCATAGCAAGTTTAAATAAGGCTAGTCCGTTATCAACTTGAAAAAGTGGCACCGAGTCGGTGCTTTTTT
4|sgABCG1_3|ABCG1	GAGGCCGATCCCAATGTGCG	2251	1911	632	919	955	542	291	756	0	0	1047	665	2654	1	938	871	2485	9619	ABCG1	ABCG1	4|sg_hABCG1_03|ABCG1	ABCG1	ACCGGAGGCCGATCCCAATGTGCGGTTTAAGAGCTATGCTGGAAACAGCATAGCAAGTTTAAATAAGGCTAGTCCGTTATCAACTTGAAAAAGTGGCACCGAGTCGGTGCTTTTTT
4|sgABCG1_4|ABCG1	GTCCACGCTGATGAACATCC	2774	2490	1906	1597	737	0	1030	1259	0	6018	1751	1325	0	1475	1798	2502	4766	9619	ABCG1	ABCG1	4|sg_hABCG1_04|ABCG1	ABCG1	ACCGGTCCACGCTGATGAACATCCGTTTAAGAGCTATGCTGGAAACAGCATAGCAAGTTTAAATAAGGCTAGTCCGTTATCAACTTGAAAAAGTGGCACCGAGTCGGTGCTTTTTT
4|sgABCG2_1|ABCG2	AAAAAACGAACGGATTAACA	0	1698	1216	387	0	0	537	433	0	0	784	311	2	1096	785	710	1935	9429	ABCG2	ABCG2	4|sg_hABCG2_01|ABCG2	ABCG2	ACCGAAAAAACGAACGGATTAACAGTTTAAGAGCTATGCTGGAAACAGCATAGCAAGTTTAAATAAGGCTAGTCCGTTATCAACTTGAAAAAGTGGCACCGAGTCGGTGCTTTTTT
4|sgABCG2_2|ABCG2	GAATTACATCAACTTTCCGG	0	917	649	885	0	759	452	516	11472	0	1090	384	5698	4	719	1675	3994	9429	ABCG2	ABCG2	4|sg_hABCG2_02|ABCG2	ABCG2	ACCGGAATTACATCAACTTTCCGGGTTTAAGAGCTATGCTGGAAACAGCATAGCAAGTTTAAATAAGGCTAGTCCGTTATCAACTTGAAAAAGTGGCACCGAGTCGGTGCTTTTTT
4|sgABCG2_3|ABCG2	GGAAGGCTCTATGATCTCTG	0	1999	992	833	1894	0	896	1060	1	3567	965	677	1	0	1293	1187	2502	9429	ABCG2	ABCG2	4|sg_hABCG2_03|ABCG2	ABCG2	ACCGGGAAGGCTCTATGATCTCTGGTTTAAGAGCTATGCTGGAAACAGCATAGCAAGTTTAAATAAGGCTAGTCCGTTATCAACTTGAAAAAGTGGCACCGAGTCGGTGCTTTTTT
4|sgABCG2_4|ABCG2	TAACTTAGGATGTCTAAGCA	0	967	1644	936	1637	0	1506	938	0	2402	1235	747	8255	3263	687	2799	3645	9429	ABCG2	ABCG2	4|sg_hABCG2_04|ABCG2	ABCG2	ACCGTAACTTAGGATGTCTAAGCAGTTTAAGAGCTATGCTGGAAACAGCATAGCAAGTTTAAATAAGGCTAGTCCGTTATCAACTTGAAAAAGTGGCACCGAGTCGGTGCTTTTTT
4|sgABCG4_1|ABCG4	CTCTGTGTCCCCAGTCATCG	1	6690	1245	975	2046	213	446	1038	0	1	1431	661	1	1150	1893	1762	3032	64137	ABCG4	ABCG4	4|sg_hABCG4_01|ABCG4	ABCG4	ACCGCTCTGTGTCCCCAGTCATCGGTTTAAGAGCTATGCTGGAAACAGCATAGCAAGTTTAAATAAGGCTAGTCCGTTATCAACTTGAAAAAGTGGCACCGAGTCGGTGCTTTTTT
4|sgABCG4_2|ABCG4	GGTGGAGAGAACTACCTGGT	0	573	387	405	1908	279	267	481	0	0	256	187	0	1353	475	511	1795	64137	ABCG4	ABCG4	4|sg_hABCG4_02|ABCG4	ABCG4	ACCGGGTGGAGAGAACTACCTGGTGTTTAAGAGCTATGCTGGAAACAGCATAGCAAGTTTAAATAAGGCTAGTCCGTTATCAACTTGAAAAAGTGGCACCGAGTCGGTGCTTTTTT
4|sgABCG4_3|ABCG4	GTGGGACATGAACCGTAGGT	0	771	959	848	1821	613	664	848	0	0	1096	519	1459	2294	1350	970	3696	64137	ABCG4	ABCG4	4|sg_hABCG4_03|ABCG4	ABCG4	ACCGGTGGGACATGAACCGTAGGTGTTTAAGAGCTATGCTGGAAACAGCATAGCAAGTTTAAATAAGGCTAGTCCGTTATCAACTTGAAAAAGTGGCACCGAGTCGGTGCTTTTTT
4|sgABCG4_4|ABCG4	TGGAGCTGTCCTATTCCGTG	0	2976	1259	1415	2	754	870	1015	0	2064	1506	750	4	2492	2212	1228	3524	64137	ABCG4	ABCG4	4|sg_hABCG4_04|ABCG4	ABCG4	ACCGTGGAGCTGTCCTATTCCGTGGTTTAAGAGCTATGCTGGAAACAGCATAGCAAGTTTAAATAAGGCTAGTCCGTTATCAACTTGAAAAAGTGGCACCGAGTCGGTGCTTTTTT
4|sgABCG5_1|ABCG5	ACACCTGAAAACGTTACCAA	0	3450	1334	1043	1	1724	1283	938	0	765	2015	1034	2	0	2047	3662	3891	64240	ABCG5	ABCG5	4|sg_hABCG5_01|ABCG5	ABCG5	ACCGACACCTGAAAACGTTACCAAGTTTAAGAGCTATGCTGGAAACAGCATAGCAAGTTTAAATAAGGCTAGTCCGTTATCAACTTGAAAAAGTGGCACCGAGTCGGTGCTTTTTT
4|sgABCG5_2|ABCG5	GGCTCGCAGGAACCGAATTG	0	1310	738	549	6963	0	1290	1217	0	0	762	479	5938	4	657	1406	2260	64240	ABCG5	ABCG5	4|sg_hABCG5_02|ABCG5	ABCG5	ACCGGGCTCGCAGGAACCGAATTGGTTTAAGAGCTATGCTGGAAACAGCATAGCAAGTTTAAATAAGGCTAGTCCGTTATCAACTTGAAAAAGTGGCACCGAGTCGGTGCTTTTTT
4|sgABCG5_3|ABCG5	GGTGCTATCCAGGACCGCGT	1	470	455	418	0	1083	1094	578	0	2947	654	426	0	1855	833	350	2147	64240	ABCG5	ABCG5	4|sg_hABCG5_03|ABCG5	ABCG5	ACCGGGTGCTATCCAGGACCGCGTGTTTAAGAGCTATGCTGGAAACAGCATAGCAAGTTTAAATAAGGCTAGTCCGTTATCAACTTGAAAAAGTGGCACCGAGTCGGTGCTTTTTT
4|sgABCG5_4|ABCG5	TGATTGGCAACTACAGCTTG	0	1114	784	679	0	0	818	447	0	2383	899	287	0	0	662	1229	2030	64240	ABCG5	ABCG5	4|sg_hABCG5_04|ABCG5	ABCG5	ACCGTGATTGGCAACTACAGCTTGGTTTAAGAGCTATGCTGGAAACAGCATAGCAAGTTTAAATAAGGCTAGTCCGTTATCAACTTGAAAAAGTGGCACCGAGTCGGTGCTTTTTT
4|sgABCG8_1|ABCG8	CACCCCCATCTACTTAGGGG	1	3349	718	405	0	269	395	250	0	0	872	445	61	1428	695	523	2086	64241	ABCG8	ABCG8	4|sg_hABCG8_01|ABCG8	ABCG8	ACCGCACCCCCATCTACTTAGGGGGTTTAAGAGCTATGCTGGAAACAGCATAGCAAGTTTAAATAAGGCTAGTCCGTTATCAACTTGAAAAAGTGGCACCGAGTCGGTGCTTTTTT
4|sgABCG8_2|ABCG8	CAGTGCGCTGACACCCGCGT	0	4169	2174	2206	550	217	320	1581	10168	4115	3024	1746	2030	4119	1214	3304	6439	64241	ABCG8	ABCG8	4|sg_hABCG8_02|ABCG8	ABCG8	ACCGCAGTGCGCTGACACCCGCGTGTTTAAGAGCTATGCTGGAAACAGCATAGCAAGTTTAAATAAGGCTAGTCCGTTATCAACTTGAAAAAGTGGCACCGAGTCGGTGCTTTTTT
4|sgABCG8_3|ABCG8	CTCAAACCAAGGGACCTGAG	0	672	1386	1711	322	908	633	613	0	250	1066	436	0	807	1162	1423	2468	64241	ABCG8	ABCG8	4|sg_hABCG8_03|ABCG8	ABCG8	ACCGCTCAAACCAAGGGACCTGAGGTTTAAGAGCTATGCTGGAAACAGCATAGCAAGTTTAAATAAGGCTAGTCCGTTATCAACTTGAAAAAGTGGCACCGAGTCGGTGCTTTTTT
4|sgABCG8_4|ABCG8	GAGTCCTACGAAGATGCCTG	1818	3661	1096	1603	1	649	565	721	1	2122	641	1018	2	8546	765	1428	3983	64241	ABCG8	ABCG8	4|sg_hABCG8_04|ABCG8	ABCG8	ACCGGAGTCCTACGAAGATGCCTGGTTTAAGAGCTATGCTGGAAACAGCATAGCAAGTTTAAATAAGGCTAGTCCGTTATCAACTTGAAAAAGTGGCACCGAGTCGGTGCTTTTTT
4|sgABHD1_1|ABHD1	AGCCCCTAGTCCTTTATCAG	1991	894	1279	701	1121	0	542	1005	1	8	1394	486	1	2739	1545	1567	3406	84696	ABHD1	ABHD1	4|sg_hABHD1_01|ABHD1	ABHD1	ACCGAGCCCCTAGTCCTTTATCAGGTTTAAGAGCTATGCTGGAAACAGCATAGCAAGTTTAAATAAGGCTAGTCCGTTATCAACTTGAAAAAGTGGCACCGAGTCGGTGCTTTTTT
4|sgABHD1_2|ABHD1	GACCCTACCGTTCCACAAGT	0	1715	1503	1088	1	135	1651	869	0	2462	1287	428	2354	1343	1075	2158	3805	84696	ABHD1	ABHD1	4|sg_hABHD1_02|ABHD1	ABHD1	ACCGGACCCTACCGTTCCACAAGTGTTTAAGAGCTATGCTGGAAACAGCATAGCAAGTTTAAATAAGGCTAGTCCGTTATCAACTTGAAAAAGTGGCACCGAGTCGGTGCTTTTTT
4|sgABHD1_3|ABHD1	GCTGTCGTGTTTAACAACCG	0	1476	1527	1340	1	452	795	1085	0	1754	1379	804	1041	665	625	1412	4171	84696	ABHD1	ABHD1	4|sg_hABHD1_03|ABHD1	ABHD1	ACCGGCTGTCGTGTTTAACAACCGGTTTAAGAGCTATGCTGGAAACAGCATAGCAAGTTTAAATAAGGCTAGTCCGTTATCAACTTGAAAAAGTGGCACCGAGTCGGTGCTTTTTT
4|sgABHD1_4|ABHD1	GGTGCAAGACGTATGTCTCC	0	0	432	537	0	0	262	182	0	2002	717	165	2712	0	823	254	2223	84696	ABHD1	ABHD1	4|sg_hABHD1_04|ABHD1	ABHD1	ACCGGGTGCAAGACGTATGTCTCCGTTTAAGAGCTATGCTGGAAACAGCATAGCAAGTTTAAATAAGGCTAGTCCGTTATCAACTTGAAAAAGTGGCACCGAGTCGGTGCTTTTTT
4|sgABHD10_1|ABHD10	TAATTGATGACTTAGCTGAT	3250	690	1207	1107	0	969	582	1069	0	0	1271	744	2831	3065	723	844	3745	55347	ABHD10	ABHD10	4|sg_hABHD10_01|ABHD10	ABHD10	ACCGTAATTGATGACTTAGCTGATGTTTAAGAGCTATGCTGGAAACAGCATAGCAAGTTTAAATAAGGCTAGTCCGTTATCAACTTGAAAAAGTGGCACCGAGTCGGTGCTTTTTT
4|sgABHD10_2|ABHD10	TACCTCAGCGGGCGCCACGG	1982	0	1412	1188	0	916	1040	669	0	1	576	307	0	1015	524	929	3392	55347	ABHD10	ABHD10	4|sg_hABHD10_02|ABHD10	ABHD10	ACCGTACCTCAGCGGGCGCCACGGGTTTAAGAGCTATGCTGGAAACAGCATAGCAAGTTTAAATAAGGCTAGTCCGTTATCAACTTGAAAAAGTGGCACCGAGTCGGTGCTTTTTT
4|sgABHD10_3|ABHD10	TCATATAAGAAAGATAGCCA	0	0	466	444	0	0	166	273	0	0	755	180	0	0	591	562	2179	55347	ABHD10	ABHD10	4|sg_hABHD10_03|ABHD10	ABHD10	ACCGTCATATAAGAAAGATAGCCAGTTTAAGAGCTATGCTGGAAACAGCATAGCAAGTTTAAATAAGGCTAGTCCGTTATCAACTTGAAAAAGTGGCACCGAGTCGGTGCTTTTTT
4|sgABHD10_4|ABHD10	TGCACGACCAGAGAAGGTCG	2737	1590	1103	978	4522	726	1012	797	7043	0	1748	794	4130	4223	1436	1819	4750	55347	ABHD10	ABHD10	4|sg_hABHD10_04|ABHD10	ABHD10	ACCGTGCACGACCAGAGAAGGTCGGTTTAAGAGCTATGCTGGAAACAGCATAGCAAGTTTAAATAAGGCTAGTCCGTTATCAACTTGAAAAAGTGGCACCGAGTCGGTGCTTTTTT
4|sgABHD11_1|ABHD11	ACGGTGGATGCTCGTAACCA	0	0	954	489	0	0	645	386	17957	0	862	367	2446	3368	1218	1048	3290	83451	ABHD11	ABHD11	4|sg_hABHD11_01|ABHD11	ABHD11	ACCGACGGTGGATGCTCGTAACCAGTTTAAGAGCTATGCTGGAAACAGCATAGCAAGTTTAAATAAGGCTAGTCCGTTATCAACTTGAAAAAGTGGCACCGAGTCGGTGCTTTTTT
4|sgABHD11_2|ABHD11	CTGCCACATAGGTTGCAAAG	1909	580	1772	966	1706	668	1302	682	0	1929	965	750	3259	1	1853	1832	3440	83451	ABHD11	ABHD11	4|sg_hABHD11_02|ABHD11	ABHD11	ACCGCTGCCACATAGGTTGCAAAGGTTTAAGAGCTATGCTGGAAACAGCATAGCAAGTTTAAATAAGGCTAGTCCGTTATCAACTTGAAAAAGTGGCACCGAGTCGGTGCTTTTTT
4|sgABHD11_3|ABHD11	GAGCCCGTGCAAAAAGACGA	1	10	525	440	1	144	5	236	0	0	674	196	0	0	474	100	2262	83451	ABHD11	ABHD11	4|sg_hABHD11_03|ABHD11	ABHD11	ACCGGAGCCCGTGCAAAAAGACGAGTTTAAGAGCTATGCTGGAAACAGCATAGCAAGTTTAAATAAGGCTAGTCCGTTATCAACTTGAAAAAGTGGCACCGAGTCGGTGCTTTTTT
4|sgABHD11_4|ABHD11	GCTGTGGCCAACGACGACGC	1	1568	1360	724	1725	470	1280	760	0	4	1078	618	1863	987	1156	1130	4800	83451	ABHD11	ABHD11	4|sg_hABHD11_04|ABHD11	ABHD11	ACCGGCTGTGGCCAACGACGACGCGTTTAAGAGCTATGCTGGAAACAGCATAGCAAGTTTAAATAAGGCTAGTCCGTTATCAACTTGAAAAAGTGGCACCGAGTCGGTGCTTTTTT
4|sgABHD12_1|ABHD12	AGGTGACCACATGGTAACCA	0	2404	1556	941	4	213	1034	1331	0	0	1562	1148	2315	1624	1700	2171	2726	26090	ABHD12	ABHD12	4|sg_hABHD12_01|ABHD12	ABHD12	ACCGAGGTGACCACATGGTAACCAGTTTAAGAGCTATGCTGGAAACAGCATAGCAAGTTTAAATAAGGCTAGTCCGTTATCAACTTGAAAAAGTGGCACCGAGTCGGTGCTTTTTT
4|sgABHD12_2|ABHD12	CCTACGCCTGACGGGCCCGG	1	2501	1409	1647	1551	302	1197	968	0	1	2906	655	4	5006	1714	2226	4375	26090	ABHD12	ABHD12	4|sg_hABHD12_02|ABHD12	ABHD12	ACCGCCTACGCCTGACGGGCCCGGGTTTAAGAGCTATGCTGGAAACAGCATAGCAAGTTTAAATAAGGCTAGTCCGTTATCAACTTGAAAAAGTGGCACCGAGTCGGTGCTTTTTT
4|sgABHD12_3|ABHD12	GAGTGGCCCCAGATGTACAC	0	1074	1319	1008	0	247	1082	1107	0	0	922	625	1041	1071	703	1842	3990	26090	ABHD12	ABHD12	4|sg_hABHD12_03|ABHD12	ABHD12	ACCGGAGTGGCCCCAGATGTACACGTTTAAGAGCTATGCTGGAAACAGCATAGCAAGTTTAAATAAGGCTAGTCCGTTATCAACTTGAAAAAGTGGCACCGAGTCGGTGCTTTTTT
4|sgABHD12_4|ABHD12	GCAGGTACAGAATGATAGGG	0	1771	1934	999	1	1168	311	1533	29707	3940	1085	1013	2239	1174	1230	1447	3462	26090	ABHD12	ABHD12	4|sg_hABHD12_04|ABHD12	ABHD12	ACCGGCAGGTACAGAATGATAGGGGTTTAAGAGCTATGCTGGAAACAGCATAGCAAGTTTAAATAAGGCTAGTCCGTTATCAACTTGAAAAAGTGGCACCGAGTCGGTGCTTTTTT
4|sgABHD12B_1|ABHD12B	CCAAGACAATAGCATCAACT	0	0	823	742	0	591	1172	895	0	2314	799	476	2	0	1138	1354	2469	145447	ABHD12B	ABHD12B	4|sg_hABHD12B_01|ABHD12B	ABHD12B	ACCGCCAAGACAATAGCATCAACTGTTTAAGAGCTATGCTGGAAACAGCATAGCAAGTTTAAATAAGGCTAGTCCGTTATCAACTTGAAAAAGTGGCACCGAGTCGGTGCTTTTTT
4|sgABHD12B_2|ABHD12B	GTCTTGTCTGTTGACTACAG	0	574	627	658	0	712	774	238	0	0	1830	727	0	2354	1045	535	2232	145447	ABHD12B	ABHD12B	4|sg_hABHD12B_02|ABHD12B	ABHD12B	ACCGGTCTTGTCTGTTGACTACAGGTTTAAGAGCTATGCTGGAAACAGCATAGCAAGTTTAAATAAGGCTAGTCCGTTATCAACTTGAAAAAGTGGCACCGAGTCGGTGCTTTTTT
4|sgABHD12B_3|ABHD12B	TAATTGGGTTCCCATCACGA	844	1766	1355	1291	1335	192	939	862	0	2167	1241	724	4	4187	2052	2191	5158	145447	ABHD12B	ABHD12B	4|sg_hABHD12B_03|ABHD12B	ABHD12B	ACCGTAATTGGGTTCCCATCACGAGTTTAAGAGCTATGCTGGAAACAGCATAGCAAGTTTAAATAAGGCTAGTCCGTTATCAACTTGAAAAAGTGGCACCGAGTCGGTGCTTTTTT
4|sgABHD12B_4|ABHD12B	TTGTGTCTATGAGTGGACCA	0	0	702	497	0	433	789	872	0	1429	484	261	3034	5	577	1747	2050	145447	ABHD12B	ABHD12B	4|sg_hABHD12B_04|ABHD12B	ABHD12B	ACCGTTGTGTCTATGAGTGGACCAGTTTAAGAGCTATGCTGGAAACAGCATAGCAAGTTTAAATAAGGCTAGTCCGTTATCAACTTGAAAAAGTGGCACCGAGTCGGTGCTTTTTT
4|sgABHD13_1|ABHD13	AATAGCCACTGCTCCACCCA	0	2527	779	970	2352	381	533	831	7780	1485	1061	404	9156	10	1970	2375	2891	84945	ABHD13	ABHD13	4|sg_hABHD13_01|ABHD13	ABHD13	ACCGAATAGCCACTGCTCCACCCAGTTTAAGAGCTATGCTGGAAACAGCATAGCAAGTTTAAATAAGGCTAGTCCGTTATCAACTTGAAAAAGTGGCACCGAGTCGGTGCTTTTTT
4|sgABHD13_2|ABHD13	CATGGGAATGCAGGCAACAT	0	560	1080	1043	0	1383	2103	1374	0	2	1753	923	1	1441	1366	1406	3065	84945	ABHD13	ABHD13	4|sg_hABHD13_02|ABHD13	ABHD13	ACCGCATGGGAATGCAGGCAACATGTTTAAGAGCTATGCTGGAAACAGCATAGCAAGTTTAAATAAGGCTAGTCCGTTATCAACTTGAAAAAGTGGCACCGAGTCGGTGCTTTTTT
4|sgABHD13_3|ABHD13	GGGAACATAAAGACGTGAAG	3325	1143	552	642	22	787	612	245	0	1455	664	702	1770	2771	397	1348	2204	84945	ABHD13	ABHD13	4|sg_hABHD13_03|ABHD13	ABHD13	ACCGGGGAACATAAAGACGTGAAGGTTTAAGAGCTATGCTGGAAACAGCATAGCAAGTTTAAATAAGGCTAGTCCGTTATCAACTTGAAAAAGTGGCACCGAGTCGGTGCTTTTTT
4|sgABHD13_4|ABHD13	TAGGATTTCAGCCATTATGG	0	1991	1567	1215	2	588	1418	1006	0	1845	1962	834	2608	5	1091	1553	3514	84945	ABHD13	ABHD13	4|sg_hABHD13_04|ABHD13	ABHD13	ACCGTAGGATTTCAGCCATTATGGGTTTAAGAGCTATGCTGGAAACAGCATAGCAAGTTTAAATAAGGCTAGTCCGTTATCAACTTGAAAAAGTGGCACCGAGTCGGTGCTTTTTT
4|sgABHD14A_1|ABHD14A	AGGCCTTTAACTCTCACACG	0	527	1613	1178	994	859	1149	606	2392	0	1282	836	1	1042	1272	1099	3582	25864	ABHD14A	ABHD14A	4|sg_hABHD14A_01|ABHD14A	ABHD14A	ACCGAGGCCTTTAACTCTCACACGGTTTAAGAGCTATGCTGGAAACAGCATAGCAAGTTTAAATAAGGCTAGTCCGTTATCAACTTGAAAAAGTGGCACCGAGTCGGTGCTTTTTT
4|sgABHD14A_2|ABHD14A	CTGGCAGCCCCACATACAGT	3988	3790	1235	1081	1	0	1023	788	0	5147	787	845	2	483	1688	1607	2547	25864	ABHD14A	ABHD14A	4|sg_hABHD14A_02|ABHD14A	ABHD14A	ACCGCTGGCAGCCCCACATACAGTGTTTAAGAGCTATGCTGGAAACAGCATAGCAAGTTTAAATAAGGCTAGTCCGTTATCAACTTGAAAAAGTGGCACCGAGTCGGTGCTTTTTT
4|sgABHD14A_3|ABHD14A	GGAGGTACAGAATGCCGTGT	1199	3516	826	1053	1	430	456	696	0	4541	2078	1018	2862	1519	1125	1102	3622	25864	ABHD14A	ABHD14A	4|sg_hABHD14A_03|ABHD14A	ABHD14A	ACCGGGAGGTACAGAATGCCGTGTGTTTAAGAGCTATGCTGGAAACAGCATAGCAAGTTTAAATAAGGCTAGTCCGTTATCAACTTGAAAAAGTGGCACCGAGTCGGTGCTTTTTT
4|sgABHD14A_4|ABHD14A	TCCCACTCAACCAGGCACAC	3725	2424	1718	1106	2	275	1349	1152	0	0	1442	481	3920	703	1062	623	3108	25864	ABHD14A	ABHD14A	4|sg_hABHD14A_04|ABHD14A	ABHD14A	ACCGTCCCACTCAACCAGGCACACGTTTAAGAGCTATGCTGGAAACAGCATAGCAAGTTTAAATAAGGCTAGTCCGTTATCAACTTGAAAAAGTGGCACCGAGTCGGTGCTTTTTT
4|sgABHD14B_1|ABHD14B	AGAACCTGGGTACACTGCAC	0	616	1089	949	0	489	448	651	0	1097	1514	623	3311	3	517	825	3734	84836	ABHD14B	ABHD14B	4|sg_hABHD14B_01|ABHD14B	ABHD14B	ACCGAGAACCTGGGTACACTGCACGTTTAAGAGCTATGCTGGAAACAGCATAGCAAGTTTAAATAAGGCTAGTCCGTTATCAACTTGAAAAAGTGGCACCGAGTCGGTGCTTTTTT
4|sgABHD14B_2|ABHD14B	GAGAGGCCCTGCCCGGCAGT	0	1160	776	1410	1	0	1014	486	0	0	721	525	3	1933	993	1515	2913	84836	ABHD14B	ABHD14B	4|sg_hABHD14B_02|ABHD14B	ABHD14B	ACCGGAGAGGCCCTGCCCGGCAGTGTTTAAGAGCTATGCTGGAAACAGCATAGCAAGTTTAAATAAGGCTAGTCCGTTATCAACTTGAAAAAGTGGCACCGAGTCGGTGCTTTTTT
4|sgABHD14B_3|ABHD14B	TGATGGACTGATCACAACCG	1	1676	570	482	1645	772	707	557	0	0	1443	471	1	2461	1074	1580	2640	84836	ABHD14B	ABHD14B	4|sg_hABHD14B_03|ABHD14B	ABHD14B	ACCGTGATGGACTGATCACAACCGGTTTAAGAGCTATGCTGGAAACAGCATAGCAAGTTTAAATAAGGCTAGTCCGTTATCAACTTGAAAAAGTGGCACCGAGTCGGTGCTTTTTT
4|sgABHD14B_4|ABHD14B	TGCAGGTCTGGGGCACTCCA	3053	2186	1390	855	1770	485	792	840	0	2671	2068	933	0	0	1603	1846	3470	84836	ABHD14B	ABHD14B	4|sg_hABHD14B_04|ABHD14B	ABHD14B	ACCGTGCAGGTCTGGGGCACTCCAGTTTAAGAGCTATGCTGGAAACAGCATAGCAAGTTTAAATAAGGCTAGTCCGTTATCAACTTGAAAAAGTGGCACCGAGTCGGTGCTTTTTT
4|sgABHD15_1|ABHD15	CAAACAAGGCTGCACCCTCC	0	537	664	653	1559	0	426	712	1	4883	502	397	2705	3	605	1241	3127	116236	ABHD15	ABHD15	4|sg_hABHD15_01|ABHD15	ABHD15	ACCGCAAACAAGGCTGCACCCTCCGTTTAAGAGCTATGCTGGAAACAGCATAGCAAGTTTAAATAAGGCTAGTCCGTTATCAACTTGAAAAAGTGGCACCGAGTCGGTGCTTTTTT
4|sgABHD15_2|ABHD15	CTGGTGATCCCCAATGCGTG	0	600	868	858	0	268	805	1028	1	0	593	471	1	1882	941	1742	2957	116236	ABHD15	ABHD15	4|sg_hABHD15_02|ABHD15	ABHD15	ACCGCTGGTGATCCCCAATGCGTGGTTTAAGAGCTATGCTGGAAACAGCATAGCAAGTTTAAATAAGGCTAGTCCGTTATCAACTTGAAAAAGTGGCACCGAGTCGGTGCTTTTTT
4|sgABHD15_3|ABHD15	GGCCGGCCTCGAACCACTCT	0	854	1825	1139	0	734	583	498	0	1822	811	538	3	1122	1021	948	4109	116236	ABHD15	ABHD15	4|sg_hABHD15_03|ABHD15	ABHD15	ACCGGGCCGGCCTCGAACCACTCTGTTTAAGAGCTATGCTGGAAACAGCATAGCAAGTTTAAATAAGGCTAGTCCGTTATCAACTTGAAAAAGTGGCACCGAGTCGGTGCTTTTTT
4|sgABHD15_4|ABHD15	TGTATGTGACCGCCTCCTTG	0	0	617	479	2	715	447	590	0	1902	1204	511	0	1648	302	534	2887	116236	ABHD15	ABHD15	4|sg_hABHD15_04|ABHD15	ABHD15	ACCGTGTATGTGACCGCCTCCTTGGTTTAAGAGCTATGCTGGAAACAGCATAGCAAGTTTAAATAAGGCTAGTCCGTTATCAACTTGAAAAAGTGGCACCGAGTCGGTGCTTTTTT
4|sgABHD16A_1|ABHD16A	ACCATGTTTGTGGACCGGCG	0	499	1522	1398	2	760	1585	827	0	4873	1104	722	2	0	1924	1139	3787	7920	ABHD16A	ABHD16A	4|sg_hABHD16A_01|ABHD16A	ABHD16A	ACCGACCATGTTTGTGGACCGGCGGTTTAAGAGCTATGCTGGAAACAGCATAGCAAGTTTAAATAAGGCTAGTCCGTTATCAACTTGAAAAAGTGGCACCGAGTCGGTGCTTTTTT
4|sgABHD16A_2|ABHD16A	ATCTACGCCTGGTCCATCGG	0	448	801	872	0	0	322	498	0	1342	1750	374	155	0	947	1034	2476	7920	ABHD16A	ABHD16A	4|sg_hABHD16A_02|ABHD16A	ABHD16A	ACCGATCTACGCCTGGTCCATCGGGTTTAAGAGCTATGCTGGAAACAGCATAGCAAGTTTAAATAAGGCTAGTCCGTTATCAACTTGAAAAAGTGGCACCGAGTCGGTGCTTTTTT
4|sgABHD16A_3|ABHD16A	CCATCTTGGAAGCAACACAT	0	850	783	982	1	189	1044	904	0	0	1097	936	4269	2	1621	1294	2101	7920	ABHD16A	ABHD16A	4|sg_hABHD16A_03|ABHD16A	ABHD16A	ACCGCCATCTTGGAAGCAACACATGTTTAAGAGCTATGCTGGAAACAGCATAGCAAGTTTAAATAAGGCTAGTCCGTTATCAACTTGAAAAAGTGGCACCGAGTCGGTGCTTTTTT
4|sgABHD16A_4|ABHD16A	CTCAGGAAGGAGTCTCGAGG	0	0	979	882	1607	713	707	621	0	0	1094	699	2	1996	599	1105	2422	7920	ABHD16A	ABHD16A	4|sg_hABHD16A_04|ABHD16A	ABHD16A	ACCGCTCAGGAAGGAGTCTCGAGGGTTTAAGAGCTATGCTGGAAACAGCATAGCAAGTTTAAATAAGGCTAGTCCGTTATCAACTTGAAAAAGTGGCACCGAGTCGGTGCTTTTTT
4|sgABHD16B_1|ABHD16B	CAGACCAGCCGTAGACCACC	5582	2237	2379	1798	984	419	1238	1361	0	1	2437	1722	2029	4492	2411	2567	5347	140701	ABHD16B	ABHD16B	4|sg_hABHD16B_01|ABHD16B	ABHD16B	ACCGCAGACCAGCCGTAGACCACCGTTTAAGAGCTATGCTGGAAACAGCATAGCAAGTTTAAATAAGGCTAGTCCGTTATCAACTTGAAAAAGTGGCACCGAGTCGGTGCTTTTTT
4|sgABHD16B_2|ABHD16B	CATCTGCTGCGAAGGCAACG	0	0	1402	795	0	1298	1798	717	0	0	386	530	1	2797	1814	1236	2607	140701	ABHD16B	ABHD16B	4|sg_hABHD16B_02|ABHD16B	ABHD16B	ACCGCATCTGCTGCGAAGGCAACGGTTTAAGAGCTATGCTGGAAACAGCATAGCAAGTTTAAATAAGGCTAGTCCGTTATCAACTTGAAAAAGTGGCACCGAGTCGGTGCTTTTTT
4|sgABHD16B_3|ABHD16B	GCGCACGTCATCCCAGCGGA	2927	1958	1813	1100	0	284	854	1066	0	1967	1613	875	3846	826	1427	3669	3664	140701	ABHD16B	ABHD16B	4|sg_hABHD16B_03|ABHD16B	ABHD16B	ACCGGCGCACGTCATCCCAGCGGAGTTTAAGAGCTATGCTGGAAACAGCATAGCAAGTTTAAATAAGGCTAGTCCGTTATCAACTTGAAAAAGTGGCACCGAGTCGGTGCTTTTTT
4|sgABHD16B_4|ABHD16B	GGCCGCTGGCTCGTGTACCC	0	1009	1111	971	18	750	714	752	0	5203	2186	1097	3545	1292	1088	1833	3836	140701	ABHD16B	ABHD16B	4|sg_hABHD16B_04|ABHD16B	ABHD16B	ACCGGGCCGCTGGCTCGTGTACCCGTTTAAGAGCTATGCTGGAAACAGCATAGCAAGTTTAAATAAGGCTAGTCCGTTATCAACTTGAAAAAGTGGCACCGAGTCGGTGCTTTTTT
4|sgABHD17A_1|ABHD17A	ACCGTAGCCGGAGTAGTCGT	0	910	537	286	0	0	253	153	5145	0	171	510	0	0	315	301	2847	81926	ABHD17A	ABHD17A	4|sg_hABHD17A_01|ABHD17A	ABHD17A	ACCGACCGTAGCCGGAGTAGTCGTGTTTAAGAGCTATGCTGGAAACAGCATAGCAAGTTTAAATAAGGCTAGTCCGTTATCAACTTGAAAAAGTGGCACCGAGTCGGTGCTTTTTT
4|sgABHD17A_2|ABHD17A	AGGCTCTCAGGGTCCCCAAG	2055	0	558	460	0	149	484	301	0	2253	692	196	1	922	399	906	2802	81926	ABHD17A	ABHD17A	4|sg_hABHD17A_02|ABHD17A	ABHD17A	ACCGAGGCTCTCAGGGTCCCCAAGGTTTAAGAGCTATGCTGGAAACAGCATAGCAAGTTTAAATAAGGCTAGTCCGTTATCAACTTGAAAAAGTGGCACCGAGTCGGTGCTTTTTT
4|sgABHD17A_3|ABHD17A	GCGCGAGCTGGACACCATCG	5106	0	1075	609	885	313	948	956	0	1725	707	472	1452	1	725	1672	2966	81926	ABHD17A	ABHD17A	4|sg_hABHD17A_03|ABHD17A	ABHD17A	ACCGGCGCGAGCTGGACACCATCGGTTTAAGAGCTATGCTGGAAACAGCATAGCAAGTTTAAATAAGGCTAGTCCGTTATCAACTTGAAAAAGTGGCACCGAGTCGGTGCTTTTTT
4|sgABHD17A_4|ABHD17A	TACACGGTCCTCTTCTCGCA	1	0	305	460	649	330	52	215	0	0	570	231	0	0	722	317	3184	81926	ABHD17A	ABHD17A	4|sg_hABHD17A_04|ABHD17A	ABHD17A	ACCGTACACGGTCCTCTTCTCGCAGTTTAAGAGCTATGCTGGAAACAGCATAGCAAGTTTAAATAAGGCTAGTCCGTTATCAACTTGAAAAAGTGGCACCGAGTCGGTGCTTTTTT
4|sgABHD17B_1|ABHD17B	CTTGGCTTGCTCTTAGGACA	0	967	2382	1898	1	1491	760	1280	0	1885	2436	1199	2055	1661	1964	2480	5282	51104	ABHD17B	ABHD17B	4|sg_hABHD17B_01|ABHD17B	ABHD17B	ACCGCTTGGCTTGCTCTTAGGACAGTTTAAGAGCTATGCTGGAAACAGCATAGCAAGTTTAAATAAGGCTAGTCCGTTATCAACTTGAAAAAGTGGCACCGAGTCGGTGCTTTTTT
4|sgABHD17B_2|ABHD17B	GAGTAAAGTGTATTTCGCAT	0	2318	1397	876	2	305	1418	835	0	1999	678	522	0	0	1812	2387	4202	51104	ABHD17B	ABHD17B	4|sg_hABHD17B_02|ABHD17B	ABHD17B	ACCGGAGTAAAGTGTATTTCGCATGTTTAAGAGCTATGCTGGAAACAGCATAGCAAGTTTAAATAAGGCTAGTCCGTTATCAACTTGAAAAAGTGGCACCGAGTCGGTGCTTTTTT
4|sgABHD17B_3|ABHD17B	TATAGGGACAGTACCGTCTG	0	3343	874	818	0	102	253	548	0	2298	1155	733	0	902	863	1493	2293	51104	ABHD17B	ABHD17B	4|sg_hABHD17B_03|ABHD17B	ABHD17B	ACCGTATAGGGACAGTACCGTCTGGTTTAAGAGCTATGCTGGAAACAGCATAGCAAGTTTAAATAAGGCTAGTCCGTTATCAACTTGAAAAAGTGGCACCGAGTCGGTGCTTTTTT
4|sgABHD17B_4|ABHD17B	TTCATGACTAGAACCAGTAA	1862	1720	1657	1759	1	1559	890	1248	1	1078	1537	1182	1	0	2295	2104	4430	51104	ABHD17B	ABHD17B	4|sg_hABHD17B_04|ABHD17B	ABHD17B	ACCGTTCATGACTAGAACCAGTAAGTTTAAGAGCTATGCTGGAAACAGCATAGCAAGTTTAAATAAGGCTAGTCCGTTATCAACTTGAAAAAGTGGCACCGAGTCGGTGCTTTTTT
4|sgABHD17C_1|ABHD17C	ACGCCGACATCGACGCCGCG	2713	4011	1574	1201	2	0	1089	866	0	0	853	950	1	1491	1619	753	3603	58489	ABHD17C	ABHD17C	4|sg_hABHD17C_01|ABHD17C	ABHD17C	ACCGACGCCGACATCGACGCCGCGGTTTAAGAGCTATGCTGGAAACAGCATAGCAAGTTTAAATAAGGCTAGTCCGTTATCAACTTGAAAAAGTGGCACCGAGTCGGTGCTTTTTT
4|sgABHD17C_2|ABHD17C	GCCGTATCCCGAGTAGTCGT	0	937	1007	1442	3492	289	991	782	7289	3141	1406	473	2	949	1205	1549	4474	58489	ABHD17C	ABHD17C	4|sg_hABHD17C_02|ABHD17C	ABHD17C	ACCGGCCGTATCCCGAGTAGTCGTGTTTAAGAGCTATGCTGGAAACAGCATAGCAAGTTTAAATAAGGCTAGTCCGTTATCAACTTGAAAAAGTGGCACCGAGTCGGTGCTTTTTT
4|sgABHD17C_3|ABHD17C	GCGCGAGAAGAAGACCTCGA	6342	2578	958	975	1147	440	789	845	0	0	1375	1021	0	1014	1193	1111	2930	58489	ABHD17C	ABHD17C	4|sg_hABHD17C_03|ABHD17C	ABHD17C	ACCGGCGCGAGAAGAAGACCTCGAGTTTAAGAGCTATGCTGGAAACAGCATAGCAAGTTTAAATAAGGCTAGTCCGTTATCAACTTGAAAAAGTGGCACCGAGTCGGTGCTTTTTT
4|sgABHD17C_4|ABHD17C	TCCCAATGCTCTGACCATAG	1	278	1101	882	2	229	672	536	0	0	608	686	0	3905	735	1376	2188	58489	ABHD17C	ABHD17C	4|sg_hABHD17C_04|ABHD17C	ABHD17C	ACCGTCCCAATGCTCTGACCATAGGTTTAAGAGCTATGCTGGAAACAGCATAGCAAGTTTAAATAAGGCTAGTCCGTTATCAACTTGAAAAAGTGGCACCGAGTCGGTGCTTTTTT
4|sgABHD2_1|ABHD2	AGGTGACCTACCTGTGCGAG	0	3026	1950	1167	2	1436	1730	1626	11986	3	1893	1295	2	1667	2841	3367	4717	11057	ABHD2	ABHD2	4|sg_hABHD2_01|ABHD2	ABHD2	ACCGAGGTGACCTACCTGTGCGAGGTTTAAGAGCTATGCTGGAAACAGCATAGCAAGTTTAAATAAGGCTAGTCCGTTATCAACTTGAAAAAGTGGCACCGAGTCGGTGCTTTTTT
4|sgABHD2_2|ABHD2	GCTCAGCCAAGGGCTCGAAG	1	732	923	819	1577	464	1585	765	0	0	1104	807	2	1439	1116	1567	2436	11057	ABHD2	ABHD2	4|sg_hABHD2_02|ABHD2	ABHD2	ACCGGCTCAGCCAAGGGCTCGAAGGTTTAAGAGCTATGCTGGAAACAGCATAGCAAGTTTAAATAAGGCTAGTCCGTTATCAACTTGAAAAAGTGGCACCGAGTCGGTGCTTTTTT
4|sgABHD2_3|ABHD2	GGGCGTAGTCAACGAAAGTG	6147	913	803	705	0	291	968	806	0	1	843	482	1205	1842	767	641	2261	11057	ABHD2	ABHD2	4|sg_hABHD2_03|ABHD2	ABHD2	ACCGGGGCGTAGTCAACGAAAGTGGTTTAAGAGCTATGCTGGAAACAGCATAGCAAGTTTAAATAAGGCTAGTCCGTTATCAACTTGAAAAAGTGGCACCGAGTCGGTGCTTTTTT
4|sgABHD2_4|ABHD2	TTTGCCCACAGGCTGCACGT	2621	1	1894	1279	2	0	1056	561	0	0	2397	968	2630	0	944	1256	3677	11057	ABHD2	ABHD2	4|sg_hABHD2_04|ABHD2	ABHD2	ACCGTTTGCCCACAGGCTGCACGTGTTTAAGAGCTATGCTGGAAACAGCATAGCAAGTTTAAATAAGGCTAGTCCGTTATCAACTTGAAAAAGTGGCACCGAGTCGGTGCTTTTTT
4|sgABHD3_1|ABHD3	ACTCCTTGCTTGTTCCCGTG	6979	4705	3828	2966	4674	2503	1647	2231	0	1	3112	1853	9550	9953	3724	5576	8721	171586	ABHD3	ABHD3	4|sg_hABHD3_01|ABHD3	ABHD3	ACCGACTCCTTGCTTGTTCCCGTGGTTTAAGAGCTATGCTGGAAACAGCATAGCAAGTTTAAATAAGGCTAGTCCGTTATCAACTTGAAAAAGTGGCACCGAGTCGGTGCTTTTTT
4|sgABHD3_2|ABHD3	GGGGGCTTCGAAGTGATGAA	18	11	10	16	39	18	23	35	0	0	28	9	0	0	6	8	16	171586	ABHD3	ABHD3	4|sg_hABHD3_02|ABHD3	ABHD3	ACCGGGGGGCTTCGAAGTGATGAAGTTTAAGAGCTATGCTGGAAACAGCATAGCAAGTTTAAATAAGGCTAGTCCGTTATCAACTTGAAAAAGTGGCACCGAGTCGGTGCTTTTTT
4|sgABHD3_3|ABHD3	GTCACTACTTCCAGACGCCA	7949	3232	2110	2205	1	489	2085	1547	0	1	3394	1595	2029	1	2366	3408	7249	171586	ABHD3	ABHD3	4|sg_hABHD3_03|ABHD3	ABHD3	ACCGGTCACTACTTCCAGACGCCAGTTTAAGAGCTATGCTGGAAACAGCATAGCAAGTTTAAATAAGGCTAGTCCGTTATCAACTTGAAAAAGTGGCACCGAGTCGGTGCTTTTTT
4|sgABHD3_4|ABHD3	TAGTACGTTTCTGTAACCAC	0	1246	445	440	1	0	970	595	0	83	362	180	0	0	414	202	1924	171586	ABHD3	ABHD3	4|sg_hABHD3_04|ABHD3	ABHD3	ACCGTAGTACGTTTCTGTAACCACGTTTAAGAGCTATGCTGGAAACAGCATAGCAAGTTTAAATAAGGCTAGTCCGTTATCAACTTGAAAAAGTGGCACCGAGTCGGTGCTTTTTT
4|sgABHD4_1|ABHD4	GACATCGATAGAGACATGGC	0	1735	1403	1504	2	382	626	1238	0	2072	1183	744	3243	5302	1305	1591	5292	63874	ABHD4	ABHD4	4|sg_hABHD4_01|ABHD4	ABHD4	ACCGGACATCGATAGAGACATGGCGTTTAAGAGCTATGCTGGAAACAGCATAGCAAGTTTAAATAAGGCTAGTCCGTTATCAACTTGAAAAAGTGGCACCGAGTCGGTGCTTTTTT
4|sgABHD4_2|ABHD4	GCTACTCGAAGAACAGCCAA	0	0	1339	1157	2718	852	224	933	0	0	1096	1236	5366	2	1184	686	2630	63874	ABHD4	ABHD4	4|sg_hABHD4_02|ABHD4	ABHD4	ACCGGCTACTCGAAGAACAGCCAAGTTTAAGAGCTATGCTGGAAACAGCATAGCAAGTTTAAATAAGGCTAGTCCGTTATCAACTTGAAAAAGTGGCACCGAGTCGGTGCTTTTTT
4|sgABHD4_3|ABHD4	GGAGGGATACATATCTGGCC	3017	393	683	732	0	358	186	479	12402	1607	845	464	1	2002	387	605	2116	63874	ABHD4	ABHD4	4|sg_hABHD4_03|ABHD4	ABHD4	ACCGGGAGGGATACATATCTGGCCGTTTAAGAGCTATGCTGGAAACAGCATAGCAAGTTTAAATAAGGCTAGTCCGTTATCAACTTGAAAAAGTGGCACCGAGTCGGTGCTTTTTT
4|sgABHD4_4|ABHD4	GGGGTGCACGGATCTCACTG	0	503	751	562	1	193	1017	631	0	1241	553	348	1	2063	675	1246	2317	63874	ABHD4	ABHD4	4|sg_hABHD4_04|ABHD4	ABHD4	ACCGGGGGTGCACGGATCTCACTGGTTTAAGAGCTATGCTGGAAACAGCATAGCAAGTTTAAATAAGGCTAGTCCGTTATCAACTTGAAAAAGTGGCACCGAGTCGGTGCTTTTTT
4|sgABHD5_1|ABHD5	GGTCGTTCAGGGAAACCCCA	0	1	515	487	1404	482	157	579	0	939	712	514	956	686	894	1066	2157	51099	ABHD5	ABHD5	4|sg_hABHD5_01|ABHD5	ABHD5	ACCGGGTCGTTCAGGGAAACCCCAGTTTAAGAGCTATGCTGGAAACAGCATAGCAAGTTTAAATAAGGCTAGTCCGTTATCAACTTGAAAAAGTGGCACCGAGTCGGTGCTTTTTT
4|sgABHD5_2|ABHD5	GTGGAGATGTGCCCTAGGAT	1827	892	1716	961	2612	619	733	1336	1	5711	1388	620	0	0	1686	1259	2874	51099	ABHD5	ABHD5	4|sg_hABHD5_02|ABHD5	ABHD5	ACCGGTGGAGATGTGCCCTAGGATGTTTAAGAGCTATGCTGGAAACAGCATAGCAAGTTTAAATAAGGCTAGTCCGTTATCAACTTGAAAAAGTGGCACCGAGTCGGTGCTTTTTT
4|sgABHD5_3|ABHD5	TAAGGTGTGATATAGACGTA	0	0	891	720	0	352	778	618	0	1617	577	219	1	997	741	1082	2239	51099	ABHD5	ABHD5	4|sg_hABHD5_03|ABHD5	ABHD5	ACCGTAAGGTGTGATATAGACGTAGTTTAAGAGCTATGCTGGAAACAGCATAGCAAGTTTAAATAAGGCTAGTCCGTTATCAACTTGAAAAAGTGGCACCGAGTCGGTGCTTTTTT
4|sgABHD5_4|ABHD5	TTGGACGAAGTAGTAGACCC	0	661	1196	610	0	207	410	367	0	0	692	465	1	0	762	833	3867	51099	ABHD5	ABHD5	4|sg_hABHD5_04|ABHD5	ABHD5	ACCGTTGGACGAAGTAGTAGACCCGTTTAAGAGCTATGCTGGAAACAGCATAGCAAGTTTAAATAAGGCTAGTCCGTTATCAACTTGAAAAAGTGGCACCGAGTCGGTGCTTTTTT
4|sgABHD6_1|ABHD6	AGTCTTCATGGTGAACATAG	0	489	789	684	1712	430	1154	674	0	1893	1481	810	1	1457	916	1846	2761	57406	ABHD6	ABHD6	4|sg_hABHD6_01|ABHD6	ABHD6	ACCGAGTCTTCATGGTGAACATAGGTTTAAGAGCTATGCTGGAAACAGCATAGCAAGTTTAAATAAGGCTAGTCCGTTATCAACTTGAAAAAGTGGCACCGAGTCGGTGCTTTTTT
4|sgABHD6_2|ABHD6	CAAGGATATGTGGCTCAGTG	3717	1464	1553	1169	0	0	1375	859	0	0	2039	661	0	0	793	1005	2718	57406	ABHD6	ABHD6	4|sg_hABHD6_02|ABHD6	ABHD6	ACCGCAAGGATATGTGGCTCAGTGGTTTAAGAGCTATGCTGGAAACAGCATAGCAAGTTTAAATAAGGCTAGTCCGTTATCAACTTGAAAAAGTGGCACCGAGTCGGTGCTTTTTT
4|sgABHD6_3|ABHD6	CTGACAATCAATTTGTACAA	0	0	515	543	1	466	334	662	1	3612	954	429	0	0	636	914	2147	57406	ABHD6	ABHD6	4|sg_hABHD6_03|ABHD6	ABHD6	ACCGCTGACAATCAATTTGTACAAGTTTAAGAGCTATGCTGGAAACAGCATAGCAAGTTTAAATAAGGCTAGTCCGTTATCAACTTGAAAAAGTGGCACCGAGTCGGTGCTTTTTT
4|sgABHD6_4|ABHD6	GCAAGTTAAGAGGATACACC	0	3762	1393	1205	6	470	1896	1357	0	0	2180	933	1	1	1628	2065	4570	57406	ABHD6	ABHD6	4|sg_hABHD6_04|ABHD6	ABHD6	ACCGGCAAGTTAAGAGGATACACCGTTTAAGAGCTATGCTGGAAACAGCATAGCAAGTTTAAATAAGGCTAGTCCGTTATCAACTTGAAAAAGTGGCACCGAGTCGGTGCTTTTTT
4|sgABHD8_1|ABHD8	GATGAAAAAGAGCACCACGT	0	0	657	795	1	252	295	373	1	2897	447	177	2365	1	439	733	2254	79575	ABHD8	ABHD8	4|sg_hABHD8_01|ABHD8	ABHD8	ACCGGATGAAAAAGAGCACCACGTGTTTAAGAGCTATGCTGGAAACAGCATAGCAAGTTTAAATAAGGCTAGTCCGTTATCAACTTGAAAAAGTGGCACCGAGTCGGTGCTTTTTT
4|sgABHD8_2|ABHD8	GCCGGGCTTGACCTCTACAA	0	568	543	248	1	346	62	366	0	1456	742	278	0	0	404	167	2018	79575	ABHD8	ABHD8	4|sg_hABHD8_02|ABHD8	ABHD8	ACCGGCCGGGCTTGACCTCTACAAGTTTAAGAGCTATGCTGGAAACAGCATAGCAAGTTTAAATAAGGCTAGTCCGTTATCAACTTGAAAAAGTGGCACCGAGTCGGTGCTTTTTT
4|sgABHD8_3|ABHD8	GTACCCAGACCTAGTGCACA	0	649	454	529	0	0	493	560	0	0	682	713	1	1366	1077	593	2022	79575	ABHD8	ABHD8	4|sg_hABHD8_03|ABHD8	ABHD8	ACCGGTACCCAGACCTAGTGCACAGTTTAAGAGCTATGCTGGAAACAGCATAGCAAGTTTAAATAAGGCTAGTCCGTTATCAACTTGAAAAAGTGGCACCGAGTCGGTGCTTTTTT
4|sgABHD8_4|ABHD8	TCACCGTGTACCGCAATGGG	5355	1	1006	725	1663	1091	466	789	0	2370	1782	787	1	0	930	1089	2807	79575	ABHD8	ABHD8	4|sg_hABHD8_04|ABHD8	ABHD8	ACCGTCACCGTGTACCGCAATGGGGTTTAAGAGCTATGCTGGAAACAGCATAGCAAGTTTAAATAAGGCTAGTCCGTTATCAACTTGAAAAAGTGGCACCGAGTCGGTGCTTTTTT
4|sgABI1_1|ABI1	GAGTTACCAGAACCTGACTC	0	489	945	848	2481	588	971	682	0	0	1058	619	2	1683	996	810	3417	10006	ABI1	ABI1	4|sg_hABI1_01|ABI1	ABI1	ACCGGAGTTACCAGAACCTGACTCGTTTAAGAGCTATGCTGGAAACAGCATAGCAAGTTTAAATAAGGCTAGTCCGTTATCAACTTGAAAAAGTGGCACCGAGTCGGTGCTTTTTT
4|sgABI1_2|ABI1	GTTGTGTCGAGATATCTGCC	0	0	580	578	1363	175	64	443	0	0	452	361	0	0	812	1230	2109	10006	ABI1	ABI1	4|sg_hABI1_02|ABI1	ABI1	ACCGGTTGTGTCGAGATATCTGCCGTTTAAGAGCTATGCTGGAAACAGCATAGCAAGTTTAAATAAGGCTAGTCCGTTATCAACTTGAAAAAGTGGCACCGAGTCGGTGCTTTTTT
4|sgABI1_3|ABI1	GTTTCCGAATATACCTTACA	0	1683	458	282	0	513	314	405	0	0	681	128	0	813	272	456	1577	10006	ABI1	ABI1	4|sg_hABI1_03|ABI1	ABI1	ACCGGTTTCCGAATATACCTTACAGTTTAAGAGCTATGCTGGAAACAGCATAGCAAGTTTAAATAAGGCTAGTCCGTTATCAACTTGAAAAAGTGGCACCGAGTCGGTGCTTTTTT
4|sgABI1_4|ABI1	TCGCCACCCACTATTGGACC	0	516	903	1301	984	1178	776	961	0	1754	1328	336	1	2599	1368	3466	3221	10006	ABI1	ABI1	4|sg_hABI1_04|ABI1	ABI1	ACCGTCGCCACCCACTATTGGACCGTTTAAGAGCTATGCTGGAAACAGCATAGCAAGTTTAAATAAGGCTAGTCCGTTATCAACTTGAAAAAGTGGCACCGAGTCGGTGCTTTTTT
4|sgABI2_1|ABI2	ACGAACTGGTCGTTCAAGGT	0	558	476	452	0	176	417	349	0	0	553	288	0	0	806	408	1791	10152	ABI2	ABI2	4|sg_hABI2_01|ABI2	ABI2	ACCGACGAACTGGTCGTTCAAGGTGTTTAAGAGCTATGCTGGAAACAGCATAGCAAGTTTAAATAAGGCTAGTCCGTTATCAACTTGAAAAAGTGGCACCGAGTCGGTGCTTTTTT
4|sgABI2_2|ABI2	CATACTCCCCCAACAATAGG	6062	2725	1920	1776	2	1906	1567	1681	0	5611	3239	1175	4089	4098	1622	2460	5708	10152	ABI2	ABI2	4|sg_hABI2_02|ABI2	ABI2	ACCGCATACTCCCCCAACAATAGGGTTTAAGAGCTATGCTGGAAACAGCATAGCAAGTTTAAATAAGGCTAGTCCGTTATCAACTTGAAAAAGTGGCACCGAGTCGGTGCTTTTTT
4|sgABI2_3|ABI2	TGCCTATCTGATAAACACCT	0	0	1161	1425	1	660	292	642	0	0	2053	672	0	0	547	1359	3669	10152	ABI2	ABI2	4|sg_hABI2_03|ABI2	ABI2	ACCGTGCCTATCTGATAAACACCTGTTTAAGAGCTATGCTGGAAACAGCATAGCAAGTTTAAATAAGGCTAGTCCGTTATCAACTTGAAAAAGTGGCACCGAGTCGGTGCTTTTTT
4|sgABI2_4|ABI2	TTACCTGGAAAGACACTGGG	0	1288	773	904	0	383	392	392	0	0	941	437	4415	4	1017	539	2100	10152	ABI2	ABI2	4|sg_hABI2_04|ABI2	ABI2	ACCGTTACCTGGAAAGACACTGGGGTTTAAGAGCTATGCTGGAAACAGCATAGCAAGTTTAAATAAGGCTAGTCCGTTATCAACTTGAAAAAGTGGCACCGAGTCGGTGCTTTTTT
4|sgABI3_1|ABI3	CCTGTCTCGAAAGAGCATCA	0	0	1171	902	3	0	1053	616	0	1	1523	404	0	0	416	977	2595	51225	ABI3	ABI3	4|sg_hABI3_01|ABI3	ABI3	ACCGCCTGTCTCGAAAGAGCATCAGTTTAAGAGCTATGCTGGAAACAGCATAGCAAGTTTAAATAAGGCTAGTCCGTTATCAACTTGAAAAAGTGGCACCGAGTCGGTGCTTTTTT
4|sgABI3_2|ABI3	CGGGCACACTCTGCGCATGT	0	643	1439	1267	1	891	934	1553	1	5437	1683	744	1668	1352	1242	950	3562	51225	ABI3	ABI3	4|sg_hABI3_02|ABI3	ABI3	ACCGCGGGCACACTCTGCGCATGTGTTTAAGAGCTATGCTGGAAACAGCATAGCAAGTTTAAATAAGGCTAGTCCGTTATCAACTTGAAAAAGTGGCACCGAGTCGGTGCTTTTTT
4|sgABI3_3|ABI3	GCGATGACCTTCTGGCCGGG	1353	572	656	782	2116	723	957	751	0	1447	958	577	0	0	855	1325	2284	51225	ABI3	ABI3	4|sg_hABI3_03|ABI3	ABI3	ACCGGCGATGACCTTCTGGCCGGGGTTTAAGAGCTATGCTGGAAACAGCATAGCAAGTTTAAATAAGGCTAGTCCGTTATCAACTTGAAAAAGTGGCACCGAGTCGGTGCTTTTTT
4|sgABI3_4|ABI3	TCAGGCCACAGACAAGCGGA	0	473	874	526	2	216	510	807	0	6504	1420	751	3014	2	1623	1252	2444	51225	ABI3	ABI3	4|sg_hABI3_04|ABI3	ABI3	ACCGTCAGGCCACAGACAAGCGGAGTTTAAGAGCTATGCTGGAAACAGCATAGCAAGTTTAAATAAGGCTAGTCCGTTATCAACTTGAAAAAGTGGCACCGAGTCGGTGCTTTTTT
4|sgABI3BP_1|ABI3BP	GAGATATCAGATTCCTACAC	0	0	468	680	1	712	974	355	0	0	686	556	2952	2	1065	265	2318	25890	ABI3BP	ABI3BP	4|sg_hABI3BP_01|ABI3BP	ABI3BP	ACCGGAGATATCAGATTCCTACACGTTTAAGAGCTATGCTGGAAACAGCATAGCAAGTTTAAATAAGGCTAGTCCGTTATCAACTTGAAAAAGTGGCACCGAGTCGGTGCTTTTTT
4|sgABI3BP_2|ABI3BP	GGGATAGATGTAGTTTGCTG	1582	660	828	599	3522	0	451	432	0	0	510	307	1862	1	734	896	1858	25890	ABI3BP	ABI3BP	4|sg_hABI3BP_02|ABI3BP	ABI3BP	ACCGGGGATAGATGTAGTTTGCTGGTTTAAGAGCTATGCTGGAAACAGCATAGCAAGTTTAAATAAGGCTAGTCCGTTATCAACTTGAAAAAGTGGCACCGAGTCGGTGCTTTTTT
4|sgABI3BP_3|ABI3BP	TCCTCATAAACCATACCCTG	2069	1351	1501	1475	1	1554	647	1588	0	3968	1813	1289	0	1283	1572	1512	5880	25890	ABI3BP	ABI3BP	4|sg_hABI3BP_03|ABI3BP	ABI3BP	ACCGTCCTCATAAACCATACCCTGGTTTAAGAGCTATGCTGGAAACAGCATAGCAAGTTTAAATAAGGCTAGTCCGTTATCAACTTGAAAAAGTGGCACCGAGTCGGTGCTTTTTT
4|sgABI3BP_4|ABI3BP	TCTAATGCACTAGACGTAGT	0	810	479	573	2	552	144	520	0	1	694	200	1	0	977	947	1922	25890	ABI3BP	ABI3BP	4|sg_hABI3BP_04|ABI3BP	ABI3BP	ACCGTCTAATGCACTAGACGTAGTGTTTAAGAGCTATGCTGGAAACAGCATAGCAAGTTTAAATAAGGCTAGTCCGTTATCAACTTGAAAAAGTGGCACCGAGTCGGTGCTTTTTT
4|sgABL1_1|ABL1	CTTAGGCTATAATCACAATG	0	1019	583	765	0	356	264	399	0	2	1092	710	0	0	1448	1210	2017	25	ABL1	ABL1	4|sg_hABL1_01|ABL1	ABL1	ACCGCTTAGGCTATAATCACAATGGTTTAAGAGCTATGCTGGAAACAGCATAGCAAGTTTAAATAAGGCTAGTCCGTTATCAACTTGAAAAAGTGGCACCGAGTCGGTGCTTTTTT
4|sgABL1_2|ABL1	GGTTCATCATCATTCAACGG	0	1978	1091	935	0	267	862	737	0	0	868	714	2	2416	1787	1303	3384	25	ABL1	ABL1	4|sg_hABL1_02|ABL1	ABL1	ACCGGGTTCATCATCATTCAACGGGTTTAAGAGCTATGCTGGAAACAGCATAGCAAGTTTAAATAAGGCTAGTCCGTTATCAACTTGAAAAAGTGGCACCGAGTCGGTGCTTTTTT
4|sgABL1_3|ABL1	TCAGTGATGATATAGAACGG	2073	1090	642	790	3	433	1266	893	0	0	1206	692	2	0	1687	2237	4210	25	ABL1	ABL1	4|sg_hABL1_03|ABL1	ABL1	ACCGTCAGTGATGATATAGAACGGGTTTAAGAGCTATGCTGGAAACAGCATAGCAAGTTTAAATAAGGCTAGTCCGTTATCAACTTGAAAAAGTGGCACCGAGTCGGTGCTTTTTT
4|sgABL1_4|ABL1	TTGCTCCCTCGAAAAGAGCG	0	1463	1057	950	4	380	521	544	0	1463	1069	471	0	0	1852	879	2295	25	ABL1	ABL1	4|sg_hABL1_04|ABL1	ABL1	ACCGTTGCTCCCTCGAAAAGAGCGGTTTAAGAGCTATGCTGGAAACAGCATAGCAAGTTTAAATAAGGCTAGTCCGTTATCAACTTGAAAAAGTGGCACCGAGTCGGTGCTTTTTT
4|sgABL2_1|ABL2	AACCTCTGTAATGACGACGG	0	910	991	738	1	1473	308	760	0	0	487	513	0	1495	678	1781	2431	27	ABL2	ABL2	4|sg_hABL2_01|ABL2	ABL2	ACCGAACCTCTGTAATGACGACGGGTTTAAGAGCTATGCTGGAAACAGCATAGCAAGTTTAAATAAGGCTAGTCCGTTATCAACTTGAAAAAGTGGCACCGAGTCGGTGCTTTTTT
4|sgABL2_2|ABL2	GGTTCAACATCACAACCATA	0	516	1287	948	0	615	684	566	0	4458	1052	643	0	0	809	1072	2498	27	ABL2	ABL2	4|sg_hABL2_02|ABL2	ABL2	ACCGGGTTCAACATCACAACCATAGTTTAAGAGCTATGCTGGAAACAGCATAGCAAGTTTAAATAAGGCTAGTCCGTTATCAACTTGAAAAAGTGGCACCGAGTCGGTGCTTTTTT
4|sgABL2_3|ABL2	TATCGAATGGAACAGCCTGA	1677	2920	908	842	1	195	474	842	0	0	852	450	2	2227	1477	1911	4448	27	ABL2	ABL2	4|sg_hABL2_03|ABL2	ABL2	ACCGTATCGAATGGAACAGCCTGAGTTTAAGAGCTATGCTGGAAACAGCATAGCAAGTTTAAATAAGGCTAGTCCGTTATCAACTTGAAAAAGTGGCACCGAGTCGGTGCTTTTTT
4|sgABL2_4|ABL2	TGTACACCATCACTCCACAG	0	1671	945	894	1459	289	1108	477	0	0	937	541	4801	5	1267	2514	2133	27	ABL2	ABL2	4|sg_hABL2_04|ABL2	ABL2	ACCGTGTACACCATCACTCCACAGGTTTAAGAGCTATGCTGGAAACAGCATAGCAAGTTTAAATAAGGCTAGTCCGTTATCAACTTGAAAAAGTGGCACCGAGTCGGTGCTTTTTT
4|sgABLIM1_1|ABLIM1	TAAGCAATCTACGAAGACCG	0	815	913	922	964	1332	971	537	1	4185	1104	828	836	2771	843	629	2663	3983	ABLIM1	ABLIM1	4|sg_hABLIM1_01|ABLIM1	ABLIM1	ACCGTAAGCAATCTACGAAGACCGGTTTAAGAGCTATGCTGGAAACAGCATAGCAAGTTTAAATAAGGCTAGTCCGTTATCAACTTGAAAAAGTGGCACCGAGTCGGTGCTTTTTT
4|sgABLIM1_2|ABLIM1	TCTAACTCCAACTTACGCTC	0	0	341	319	1	293	151	237	0	0	722	141	0	0	291	620	1770	3983	ABLIM1	ABLIM1	4|sg_hABLIM1_02|ABLIM1	ABLIM1	ACCGTCTAACTCCAACTTACGCTCGTTTAAGAGCTATGCTGGAAACAGCATAGCAAGTTTAAATAAGGCTAGTCCGTTATCAACTTGAAAAAGTGGCACCGAGTCGGTGCTTTTTT
4|sgABLIM1_3|ABLIM1	TCTTTCGGACTGGACGACAT	0	0	648	315	3160	675	410	375	1	2269	677	433	1	0	852	1091	2158	3983	ABLIM1	ABLIM1	4|sg_hABLIM1_03|ABLIM1	ABLIM1	ACCGTCTTTCGGACTGGACGACATGTTTAAGAGCTATGCTGGAAACAGCATAGCAAGTTTAAATAAGGCTAGTCCGTTATCAACTTGAAAAAGTGGCACCGAGTCGGTGCTTTTTT
4|sgABLIM1_4|ABLIM1	TGTTACATACACGCCCACGT	1	20	987	1338	0	394	604	667	0	2	1540	450	2817	1030	1124	1139	3711	3983	ABLIM1	ABLIM1	4|sg_hABLIM1_04|ABLIM1	ABLIM1	ACCGTGTTACATACACGCCCACGTGTTTAAGAGCTATGCTGGAAACAGCATAGCAAGTTTAAATAAGGCTAGTCCGTTATCAACTTGAAAAAGTGGCACCGAGTCGGTGCTTTTTT
4|sgABLIM2_1|ABLIM2	AGGTCGGAGTGTAGCGCCCG	2175	951	1214	901	1	809	1532	1109	0	0	1058	795	0	0	1050	1558	3144	84448	ABLIM2	ABLIM2	4|sg_hABLIM2_01|ABLIM2	ABLIM2	ACCGAGGTCGGAGTGTAGCGCCCGGTTTAAGAGCTATGCTGGAAACAGCATAGCAAGTTTAAATAAGGCTAGTCCGTTATCAACTTGAAAAAGTGGCACCGAGTCGGTGCTTTTTT
4|sgABLIM2_2|ABLIM2	CTTACATAAATCACACGGCT	1	1137	2163	1455	1361	427	614	758	0	0	2083	1112	2021	4	1480	1729	4212	84448	ABLIM2	ABLIM2	4|sg_hABLIM2_02|ABLIM2	ABLIM2	ACCGCTTACATAAATCACACGGCTGTTTAAGAGCTATGCTGGAAACAGCATAGCAAGTTTAAATAAGGCTAGTCCGTTATCAACTTGAAAAAGTGGCACCGAGTCGGTGCTTTTTT
4|sgABLIM2_3|ABLIM2	GCTGTGAGAAATACATCACG	0	1016	773	413	1419	0	537	273	0	1987	406	267	0	0	268	344	2024	84448	ABLIM2	ABLIM2	4|sg_hABLIM2_03|ABLIM2	ABLIM2	ACCGGCTGTGAGAAATACATCACGGTTTAAGAGCTATGCTGGAAACAGCATAGCAAGTTTAAATAAGGCTAGTCCGTTATCAACTTGAAAAAGTGGCACCGAGTCGGTGCTTTTTT
4|sgABLIM2_4|ABLIM2	GTGAGTAGGAGATCATGTCG	0	556	1400	1258	1847	654	960	1086	1	3089	1628	845	4	4388	1338	531	4220	84448	ABLIM2	ABLIM2	4|sg_hABLIM2_04|ABLIM2	ABLIM2	ACCGGTGAGTAGGAGATCATGTCGGTTTAAGAGCTATGCTGGAAACAGCATAGCAAGTTTAAATAAGGCTAGTCCGTTATCAACTTGAAAAAGTGGCACCGAGTCGGTGCTTTTTT
4|sgABLIM3_1|ABLIM3	AGGTCACCTTGTCTCCAATG	3599	4717	2172	1395	3	2273	1434	2038	0	1631	1930	1501	1	0	2038	3181	5629	22885	ABLIM3	ABLIM3	4|sg_hABLIM3_01|ABLIM3	ABLIM3	ACCGAGGTCACCTTGTCTCCAATGGTTTAAGAGCTATGCTGGAAACAGCATAGCAAGTTTAAATAAGGCTAGTCCGTTATCAACTTGAAAAAGTGGCACCGAGTCGGTGCTTTTTT
4|sgABLIM3_2|ABLIM3	CAAGGTTAAGTCTATCTACG	0	1688	1020	1131	0	184	828	678	0	1275	706	516	1	1306	1596	1494	3636	22885	ABLIM3	ABLIM3	4|sg_hABLIM3_02|ABLIM3	ABLIM3	ACCGCAAGGTTAAGTCTATCTACGGTTTAAGAGCTATGCTGGAAACAGCATAGCAAGTTTAAATAAGGCTAGTCCGTTATCAACTTGAAAAAGTGGCACCGAGTCGGTGCTTTTTT
4|sgABLIM3_3|ABLIM3	GGAAGTGGTTGTTGTGCACG	1958	1891	2187	1662	2	695	1545	1532	6776	1373	3917	1909	1	983	3274	2889	5785	22885	ABLIM3	ABLIM3	4|sg_hABLIM3_03|ABLIM3	ABLIM3	ACCGGGAAGTGGTTGTTGTGCACGGTTTAAGAGCTATGCTGGAAACAGCATAGCAAGTTTAAATAAGGCTAGTCCGTTATCAACTTGAAAAAGTGGCACCGAGTCGGTGCTTTTTT
4|sgABLIM3_4|ABLIM3	TGGGGGAGTCTATGTACCCC	0	0	323	415	0	190	148	151	0	0	723	188	0	0	250	188	1595	22885	ABLIM3	ABLIM3	4|sg_hABLIM3_04|ABLIM3	ABLIM3	ACCGTGGGGGAGTCTATGTACCCCGTTTAAGAGCTATGCTGGAAACAGCATAGCAAGTTTAAATAAGGCTAGTCCGTTATCAACTTGAAAAAGTGGCACCGAGTCGGTGCTTTTTT
4|sgABO_1|ABO	AGCCAAAGGTGCTGACACCG	4016	1168	1356	1163	1374	703	617	753	0	2116	953	715	259	0	1321	1352	3148	28	ABO	ABO	4|sg_hABO_01|ABO	ABO	ACCGAGCCAAAGGTGCTGACACCGGTTTAAGAGCTATGCTGGAAACAGCATAGCAAGTTTAAATAAGGCTAGTCCGTTATCAACTTGAAAAAGTGGCACCGAGTCGGTGCTTTTTT
4|sgABO_2|ABO	ATGGAGTTCCGCGACCACGT	0	1330	1134	722	0	0	774	736	16041	0	1887	812	12	1911	1031	1890	2455	28	ABO	ABO	4|sg_hABO_02|ABO	ABO	ACCGATGGAGTTCCGCGACCACGTGTTTAAGAGCTATGCTGGAAACAGCATAGCAAGTTTAAATAAGGCTAGTCCGTTATCAACTTGAAAAAGTGGCACCGAGTCGGTGCTTTTTT
4|sgABO_3|ABO	CCGGTCCCCAGCGTCACGCG	0	10	1207	1096	3067	260	1290	1212	4878	0	1729	831	2761	2791	1673	3190	3613	28	ABO	ABO	4|sg_hABO_03|ABO	ABO	ACCGCCGGTCCCCAGCGTCACGCGGTTTAAGAGCTATGCTGGAAACAGCATAGCAAGTTTAAATAAGGCTAGTCCGTTATCAACTTGAAAAAGTGGCACCGAGTCGGTGCTTTTTT
4|sgABO_4|ABO	TGATCAGTGACTTCTGCGAG	1	1663	872	866	0	0	464	797	0	0	688	324	2	3065	879	773	2299	28	ABO	ABO	4|sg_hABO_04|ABO	ABO	ACCGTGATCAGTGACTTCTGCGAGGTTTAAGAGCTATGCTGGAAACAGCATAGCAAGTTTAAATAAGGCTAGTCCGTTATCAACTTGAAAAAGTGGCACCGAGTCGGTGCTTTTTT
4|sgABR_1|ABR	CAAGAGTGAAATCCAGAAGG	2950	2679	2199	1841	945	352	1653	879	0	0	2430	1603	7162	1290	2328	1396	4722	29	ABR	ABR	4|sg_hABR_01|ABR	ABR	ACCGCAAGAGTGAAATCCAGAAGGGTTTAAGAGCTATGCTGGAAACAGCATAGCAAGTTTAAATAAGGCTAGTCCGTTATCAACTTGAAAAAGTGGCACCGAGTCGGTGCTTTTTT
4|sgABR_2|ABR	CTGCAGTGACAACGCCCAAG	0	5022	2369	2116	1	1510	1538	1276	0	0	1903	1474	3542	1625	2114	1684	4962	29	ABR	ABR	4|sg_hABR_02|ABR	ABR	ACCGCTGCAGTGACAACGCCCAAGGTTTAAGAGCTATGCTGGAAACAGCATAGCAAGTTTAAATAAGGCTAGTCCGTTATCAACTTGAAAAAGTGGCACCGAGTCGGTGCTTTTTT
4|sgABR_3|ABR	GAGGCTTGACACTCACGTGT	1667	482	791	573	1	548	431	716	0	0	668	525	1732	1	855	727	2903	29	ABR	ABR	4|sg_hABR_03|ABR	ABR	ACCGGAGGCTTGACACTCACGTGTGTTTAAGAGCTATGCTGGAAACAGCATAGCAAGTTTAAATAAGGCTAGTCCGTTATCAACTTGAAAAAGTGGCACCGAGTCGGTGCTTTTTT
4|sgABR_4|ABR	TACTGTCCTCGGACTACGAG	1792	2936	1774	1297	3829	22	1052	1154	0	0	1469	1136	2741	1636	1854	2205	3879	29	ABR	ABR	4|sg_hABR_04|ABR	ABR	ACCGTACTGTCCTCGGACTACGAGGTTTAAGAGCTATGCTGGAAACAGCATAGCAAGTTTAAATAAGGCTAGTCCGTTATCAACTTGAAAAAGTGGCACCGAGTCGGTGCTTTTTT
4|sgABRA_1|ABRA	CCTCAGCCACAGGTACGAGA	0	795	930	837	2879	1306	1289	1044	0	4034	1087	296	1334	1	1404	1547	3171	137735	ABRA	ABRA	4|sg_hABRA_01|ABRA	ABRA	ACCGCCTCAGCCACAGGTACGAGAGTTTAAGAGCTATGCTGGAAACAGCATAGCAAGTTTAAATAAGGCTAGTCCGTTATCAACTTGAAAAAGTGGCACCGAGTCGGTGCTTTTTT
4|sgABRA_2|ABRA	CCTGGTGTCTGAGCTAACCA	1879	1470	2158	1921	821	1166	2544	1532	0	0	2407	1340	1	0	1769	3120	6299	137735	ABRA	ABRA	4|sg_hABRA_02|ABRA	ABRA	ACCGCCTGGTGTCTGAGCTAACCAGTTTAAGAGCTATGCTGGAAACAGCATAGCAAGTTTAAATAAGGCTAGTCCGTTATCAACTTGAAAAAGTGGCACCGAGTCGGTGCTTTTTT
4|sgABRA_3|ABRA	GAAAGAGGTGTCCAAAACGG	2097	161	897	769	1200	309	764	388	0	0	690	487	1025	2	1939	1721	2298	137735	ABRA	ABRA	4|sg_hABRA_03|ABRA	ABRA	ACCGGAAAGAGGTGTCCAAAACGGGTTTAAGAGCTATGCTGGAAACAGCATAGCAAGTTTAAATAAGGCTAGTCCGTTATCAACTTGAAAAAGTGGCACCGAGTCGGTGCTTTTTT
4|sgABRA_4|ABRA	GAATGCATTCACTTACTGGG	1	1	967	798	1	118	488	441	0	3507	1548	768	6830	8	1185	1166	2406	137735	ABRA	ABRA	4|sg_hABRA_04|ABRA	ABRA	ACCGGAATGCATTCACTTACTGGGGTTTAAGAGCTATGCTGGAAACAGCATAGCAAGTTTAAATAAGGCTAGTCCGTTATCAACTTGAAAAAGTGGCACCGAGTCGGTGCTTTTTT
4|sgABRACL_1|ABRACL	AAAGTTAAGCGTGAAATTTG	0	991	1555	1502	2	0	674	850	0	0	1302	872	0	2132	1475	1160	3076	58527	ABRACL	ABRACL	4|sg_hABRACL_01|ABRACL	ABRACL	ACCGAAAGTTAAGCGTGAAATTTGGTTTAAGAGCTATGCTGGAAACAGCATAGCAAGTTTAAATAAGGCTAGTCCGTTATCAACTTGAAAAAGTGGCACCGAGTCGGTGCTTTTTT
4|sgABRACL_2|ABRACL	AGCAATGAATGTGGATCACG	0	420	1006	821	0	1138	960	563	0	0	879	469	2594	3	791	395	2189	58527	ABRACL	ABRACL	4|sg_hABRACL_02|ABRACL	ABRACL	ACCGAGCAATGAATGTGGATCACGGTTTAAGAGCTATGCTGGAAACAGCATAGCAAGTTTAAATAAGGCTAGTCCGTTATCAACTTGAAAAAGTGGCACCGAGTCGGTGCTTTTTT
4|sgABRACL_3|ABRACL	CGAGGTTAACCTCTTAGTGG	0	3648	1730	1441	1	1569	1699	898	0	3359	2372	1366	5046	858	1465	2667	4481	58527	ABRACL	ABRACL	4|sg_hABRACL_03|ABRACL	ABRACL	ACCGCGAGGTTAACCTCTTAGTGGGTTTAAGAGCTATGCTGGAAACAGCATAGCAAGTTTAAATAAGGCTAGTCCGTTATCAACTTGAAAAAGTGGCACCGAGTCGGTGCTTTTTT
4|sgABRACL_4|ABRACL	GGTTGGCACATTTATCATCA	0	0	618	379	0	0	796	508	0	0	689	473	1	0	506	1924	1594	58527	ABRACL	ABRACL	4|sg_hABRACL_04|ABRACL	ABRACL	ACCGGGTTGGCACATTTATCATCAGTTTAAGAGCTATGCTGGAAACAGCATAGCAAGTTTAAATAAGGCTAGTCCGTTATCAACTTGAAAAAGTGGCACCGAGTCGGTGCTTTTTT
4|sgABT1_1|ABT1	AAAAAAGCGGTCCTACACCA	0	489	464	586	1360	1	651	532	0	1518	438	260	0	0	521	975	2979	29777	ABT1	ABT1	4|sg_hABT1_01|ABT1	ABT1	ACCGAAAAAAGCGGTCCTACACCAGTTTAAGAGCTATGCTGGAAACAGCATAGCAAGTTTAAATAAGGCTAGTCCGTTATCAACTTGAAAAAGTGGCACCGAGTCGGTGCTTTTTT
4|sgABT1_2|ABT1	AGAACAGACACTAGATGCGG	0	0	761	391	1664	0	157	491	0	1	1693	386	2704	3227	1045	533	3617	29777	ABT1	ABT1	4|sg_hABT1_02|ABT1	ABT1	ACCGAGAACAGACACTAGATGCGGGTTTAAGAGCTATGCTGGAAACAGCATAGCAAGTTTAAATAAGGCTAGTCCGTTATCAACTTGAAAAAGTGGCACCGAGTCGGTGCTTTTTT
4|sgABT1_3|ABT1	GACGCGTCCGACCTCGCCAT	3018	897	57	144	0	213	0	66	0	0	325	83	0	0	221	66	2584	29777	ABT1	ABT1	4|sg_hABT1_03|ABT1	ABT1	ACCGGACGCGTCCGACCTCGCCATGTTTAAGAGCTATGCTGGAAACAGCATAGCAAGTTTAAATAAGGCTAGTCCGTTATCAACTTGAAAAAGTGGCACCGAGTCGGTGCTTTTTT
4|sgABT1_4|ABT1	GTTCCAAAGATCATAACGGA	0	1598	365	308	0	144	254	161	0	0	77	12	2384	2	246	107	1736	29777	ABT1	ABT1	4|sg_hABT1_04|ABT1	ABT1	ACCGGTTCCAAAGATCATAACGGAGTTTAAGAGCTATGCTGGAAACAGCATAGCAAGTTTAAATAAGGCTAGTCCGTTATCAACTTGAAAAAGTGGCACCGAGTCGGTGCTTTTTT
4|sgABTB1_1|ABTB1	CGCACTTACTCGGAGCTCGG	0	576	1306	1120	3414	355	1224	697	0	2290	1371	585	2307	2488	1599	2256	2458	80325	ABTB1	ABTB1	4|sg_hABTB1_01|ABTB1	ABTB1	ACCGCGCACTTACTCGGAGCTCGGGTTTAAGAGCTATGCTGGAAACAGCATAGCAAGTTTAAATAAGGCTAGTCCGTTATCAACTTGAAAAAGTGGCACCGAGTCGGTGCTTTTTT
4|sgABTB1_2|ABTB1	CTACAAAGACCACGTCACTG	1717	3498	1005	552	390	726	923	470	0	2	1128	931	1	1219	992	1549	2441	80325	ABTB1	ABTB1	4|sg_hABTB1_02|ABTB1	ABTB1	ACCGCTACAAAGACCACGTCACTGGTTTAAGAGCTATGCTGGAAACAGCATAGCAAGTTTAAATAAGGCTAGTCCGTTATCAACTTGAAAAAGTGGCACCGAGTCGGTGCTTTTTT
4|sgABTB1_3|ABTB1	GGGCTCGGAAGTAGTCACTG	0	0	651	517	1	0	408	309	0	0	582	92	4427	3	858	731	2301	80325	ABTB1	ABTB1	4|sg_hABTB1_03|ABTB1	ABTB1	ACCGGGGCTCGGAAGTAGTCACTGGTTTAAGAGCTATGCTGGAAACAGCATAGCAAGTTTAAATAAGGCTAGTCCGTTATCAACTTGAAAAAGTGGCACCGAGTCGGTGCTTTTTT
4|sgABTB1_4|ABTB1	TGTAATCGCGTAGAGCCCGG	0	772	930	835	1	0	472	451	0	0	788	272	1	2998	841	783	2989	80325	ABTB1	ABTB1	4|sg_hABTB1_04|ABTB1	ABTB1	ACCGTGTAATCGCGTAGAGCCCGGGTTTAAGAGCTATGCTGGAAACAGCATAGCAAGTTTAAATAAGGCTAGTCCGTTATCAACTTGAAAAAGTGGCACCGAGTCGGTGCTTTTTT
4|sgABTB2_1|ABTB2	AGGGGCTGAAGTATGCGGGG	0	1711	1138	1108	4274	1619	421	798	7248	0	1908	1073	0	2	1031	1774	2482	25841	ABTB2	ABTB2	4|sg_hABTB2_01|ABTB2	ABTB2	ACCGAGGGGCTGAAGTATGCGGGGGTTTAAGAGCTATGCTGGAAACAGCATAGCAAGTTTAAATAAGGCTAGTCCGTTATCAACTTGAAAAAGTGGCACCGAGTCGGTGCTTTTTT
4|sgABTB2_2|ABTB2	CCTCATCAACCAAGCCATCG	0	2004	2090	1984	3	1804	1327	1546	0	1	2268	634	1	5691	2974	1595	4528	25841	ABTB2	ABTB2	4|sg_hABTB2_02|ABTB2	ABTB2	ACCGCCTCATCAACCAAGCCATCGGTTTAAGAGCTATGCTGGAAACAGCATAGCAAGTTTAAATAAGGCTAGTCCGTTATCAACTTGAAAAAGTGGCACCGAGTCGGTGCTTTTTT
4|sgABTB2_3|ABTB2	GAGGGCTCGGCAGTGAACGG	0	2042	1519	1335	2	1016	912	1576	0	1678	1886	622	1	1269	962	1526	3142	25841	ABTB2	ABTB2	4|sg_hABTB2_03|ABTB2	ABTB2	ACCGGAGGGCTCGGCAGTGAACGGGTTTAAGAGCTATGCTGGAAACAGCATAGCAAGTTTAAATAAGGCTAGTCCGTTATCAACTTGAAAAAGTGGCACCGAGTCGGTGCTTTTTT
4|sgABTB2_4|ABTB2	TGTTCAAGGTCATTCTCGGG	0	1460	528	736	0	0	490	458	0	0	748	428	0	0	991	602	1789	25841	ABTB2	ABTB2	4|sg_hABTB2_04|ABTB2	ABTB2	ACCGTGTTCAAGGTCATTCTCGGGGTTTAAGAGCTATGCTGGAAACAGCATAGCAAGTTTAAATAAGGCTAGTCCGTTATCAACTTGAAAAAGTGGCACCGAGTCGGTGCTTTTTT
4|sgACAA1_1|ACAA1	AGCGCGAAGTAATATTTCCA	0	0	615	377	1	0	288	412	0	0	366	439	1	0	661	1006	2008	30	ACAA1	ACAA1	4|sg_hACAA1_01|ACAA1	ACAA1	ACCGAGCGCGAAGTAATATTTCCAGTTTAAGAGCTATGCTGGAAACAGCATAGCAAGTTTAAATAAGGCTAGTCCGTTATCAACTTGAAAAAGTGGCACCGAGTCGGTGCTTTTTT
4|sgACAA1_2|ACAA1	CTGCCGAGAGAAGCTCGTCG	0	317	512	275	3112	314	612	854	0	0	738	515	5	0	714	604	2195	30	ACAA1	ACAA1	4|sg_hACAA1_02|ACAA1	ACAA1	ACCGCTGCCGAGAGAAGCTCGTCGGTTTAAGAGCTATGCTGGAAACAGCATAGCAAGTTTAAATAAGGCTAGTCCGTTATCAACTTGAAAAAGTGGCACCGAGTCGGTGCTTTTTT
4|sgACAA1_3|ACAA1	GCCCTTGTCATCATGGACCG	0	788	1059	816	2	626	517	853	0	0	801	818	0	603	1164	1028	2947	30	ACAA1	ACAA1	4|sg_hACAA1_03|ACAA1	ACAA1	ACCGGCCCTTGTCATCATGGACCGGTTTAAGAGCTATGCTGGAAACAGCATAGCAAGTTTAAATAAGGCTAGTCCGTTATCAACTTGAAAAAGTGGCACCGAGTCGGTGCTTTTTT
4|sgACAA1_4|ACAA1	TCAATAGACAGTGTTCGTCG	6623	605	586	779	0	0	70	277	0	0	285	178	0	108	738	287	1528	30	ACAA1	ACAA1	4|sg_hACAA1_04|ACAA1	ACAA1	ACCGTCAATAGACAGTGTTCGTCGGTTTAAGAGCTATGCTGGAAACAGCATAGCAAGTTTAAATAAGGCTAGTCCGTTATCAACTTGAAAAAGTGGCACCGAGTCGGTGCTTTTTT
4|sgACAA2_1|ACAA2	TACCTGACATCCATTCACAA	0	608	571	199	0	0	580	400	1	3257	783	683	0	0	347	303	1547	10449	ACAA2	ACAA2	4|sg_hACAA2_01|ACAA2	ACAA2	ACCGTACCTGACATCCATTCACAAGTTTAAGAGCTATGCTGGAAACAGCATAGCAAGTTTAAATAAGGCTAGTCCGTTATCAACTTGAAAAAGTGGCACCGAGTCGGTGCTTTTTT
4|sgACAA2_2|ACAA2	TAGCAGTGAAGTCTTTCAGA	0	256	609	767	1716	658	573	811	0	1888	639	634	1	3331	978	1803	1821	10449	ACAA2	ACAA2	4|sg_hACAA2_02|ACAA2	ACAA2	ACCGTAGCAGTGAAGTCTTTCAGAGTTTAAGAGCTATGCTGGAAACAGCATAGCAAGTTTAAATAAGGCTAGTCCGTTATCAACTTGAAAAAGTGGCACCGAGTCGGTGCTTTTTT
4|sgACAA2_3|ACAA2	TGTTACTGCAGGGAATGCAT	2371	1	601	378	0	0	271	192	0	1	1199	228	1	3049	824	763	2282	10449	ACAA2	ACAA2	4|sg_hACAA2_03|ACAA2	ACAA2	ACCGTGTTACTGCAGGGAATGCATGTTTAAGAGCTATGCTGGAAACAGCATAGCAAGTTTAAATAAGGCTAGTCCGTTATCAACTTGAAAAAGTGGCACCGAGTCGGTGCTTTTTT
4|sgACAA2_4|ACAA2	TTTCTGTAACTGTTCCAGGG	0	936	895	628	1624	1141	653	656	1	1689	761	384	1	0	1124	1551	1581	10449	ACAA2	ACAA2	4|sg_hACAA2_04|ACAA2	ACAA2	ACCGTTTCTGTAACTGTTCCAGGGGTTTAAGAGCTATGCTGGAAACAGCATAGCAAGTTTAAATAAGGCTAGTCCGTTATCAACTTGAAAAAGTGGCACCGAGTCGGTGCTTTTTT
4|sgACACA_1|ACACA	AATGCATGCGGTCTATCCGT	2134	2095	1617	1094	1001	947	1121	1032	0	1984	2026	676	0	0	1419	1058	6834	31	ACACA	ACACA	4|sg_hACACA_01|ACACA	ACACA	ACCGAATGCATGCGGTCTATCCGTGTTTAAGAGCTATGCTGGAAACAGCATAGCAAGTTTAAATAAGGCTAGTCCGTTATCAACTTGAAAAAGTGGCACCGAGTCGGTGCTTTTTT
4|sgACACA_2|ACACA	CCAGAGTCCCACATTCCCTG	3874	479	964	639	0	0	419	278	0	0	798	310	1	1725	1123	920	3044	31	ACACA	ACACA	4|sg_hACACA_02|ACACA	ACACA	ACCGCCAGAGTCCCACATTCCCTGGTTTAAGAGCTATGCTGGAAACAGCATAGCAAGTTTAAATAAGGCTAGTCCGTTATCAACTTGAAAAAGTGGCACCGAGTCGGTGCTTTTTT
4|sgACACA_3|ACACA	TATTTGCCTAGGTACCGAAG	0	0	171	287	0	0	216	174	0	0	312	100	0	0	304	765	1922	31	ACACA	ACACA	4|sg_hACACA_03|ACACA	ACACA	ACCGTATTTGCCTAGGTACCGAAGGTTTAAGAGCTATGCTGGAAACAGCATAGCAAGTTTAAATAAGGCTAGTCCGTTATCAACTTGAAAAAGTGGCACCGAGTCGGTGCTTTTTT
4|sgACACA_4|ACACA	TGATGGGTCCATGATAACCG	2089	0	341	330	0	0	164	264	0	0	891	210	0	0	450	290	2251	31	ACACA	ACACA	4|sg_hACACA_04|ACACA	ACACA	ACCGTGATGGGTCCATGATAACCGGTTTAAGAGCTATGCTGGAAACAGCATAGCAAGTTTAAATAAGGCTAGTCCGTTATCAACTTGAAAAAGTGGCACCGAGTCGGTGCTTTTTT
4|sgACACB_1|ACACB	AAAGCGTGTGACAAACTCAG	0	0	840	1140	1	938	838	577	11787	3653	1851	530	1	1281	854	1850	3042	32	ACACB	ACACB	4|sg_hACACB_01|ACACB	ACACB	ACCGAAAGCGTGTGACAAACTCAGGTTTAAGAGCTATGCTGGAAACAGCATAGCAAGTTTAAATAAGGCTAGTCCGTTATCAACTTGAAAAAGTGGCACCGAGTCGGTGCTTTTTT
4|sgACACB_2|ACACB	ACAACGACATCGACACCGGG	1	798	1739	1383	2242	3	1245	719	0	990	1398	1014	1950	1159	1488	1951	3157	32	ACACB	ACACB	4|sg_hACACB_02|ACACB	ACACB	ACCGACAACGACATCGACACCGGGGTTTAAGAGCTATGCTGGAAACAGCATAGCAAGTTTAAATAAGGCTAGTCCGTTATCAACTTGAAAAAGTGGCACCGAGTCGGTGCTTTTTT
4|sgACACB_3|ACACB	GAACTCGAATATGGCCAGCG	0	856	665	580	0	1188	489	531	0	1632	981	286	0	553	662	868	2435	32	ACACB	ACACB	4|sg_hACACB_03|ACACB	ACACB	ACCGGAACTCGAATATGGCCAGCGGTTTAAGAGCTATGCTGGAAACAGCATAGCAAGTTTAAATAAGGCTAGTCCGTTATCAACTTGAAAAAGTGGCACCGAGTCGGTGCTTTTTT
4|sgACACB_4|ACACB	GTCGGAGTCCATAATCCACA	0	600	693	541	1	150	2	430	8235	0	713	356	2	1214	1091	513	1762	32	ACACB	ACACB	4|sg_hACACB_04|ACACB	ACACB	ACCGGTCGGAGTCCATAATCCACAGTTTAAGAGCTATGCTGGAAACAGCATAGCAAGTTTAAATAAGGCTAGTCCGTTATCAACTTGAAAAAGTGGCACCGAGTCGGTGCTTTTTT
4|sgACAD10_1|ACAD10	AGCTCGATACTGCTTAACCC	0	371	628	597	0	212	322	631	0	0	911	463	0	0	549	1265	2416	80724	ACAD10	ACAD10	4|sg_hACAD10_01|ACAD10	ACAD10	ACCGAGCTCGATACTGCTTAACCCGTTTAAGAGCTATGCTGGAAACAGCATAGCAAGTTTAAATAAGGCTAGTCCGTTATCAACTTGAAAAAGTGGCACCGAGTCGGTGCTTTTTT
4|sgACAD10_2|ACAD10	ATCGCTTGTAGACTCCCTGT	0	2510	591	742	0	267	321	465	0	3336	1196	284	1041	0	1047	842	2919	80724	ACAD10	ACAD10	4|sg_hACAD10_02|ACAD10	ACAD10	ACCGATCGCTTGTAGACTCCCTGTGTTTAAGAGCTATGCTGGAAACAGCATAGCAAGTTTAAATAAGGCTAGTCCGTTATCAACTTGAAAAAGTGGCACCGAGTCGGTGCTTTTTT
4|sgACAD10_3|ACAD10	CCAGCTCATACCTCAAGGGG	0	1395	1177	1307	0	2176	1339	938	1	1514	1179	855	2	1892	1594	2134	4182	80724	ACAD10	ACAD10	4|sg_hACAD10_03|ACAD10	ACAD10	ACCGCCAGCTCATACCTCAAGGGGGTTTAAGAGCTATGCTGGAAACAGCATAGCAAGTTTAAATAAGGCTAGTCCGTTATCAACTTGAAAAAGTGGCACCGAGTCGGTGCTTTTTT
4|sgACAD10_4|ACAD10	TCCAACTTACTACATCAGGC	0	398	458	545	0	216	141	417	0	0	433	303	8	2856	296	418	1933	80724	ACAD10	ACAD10	4|sg_hACAD10_04|ACAD10	ACAD10	ACCGTCCAACTTACTACATCAGGCGTTTAAGAGCTATGCTGGAAACAGCATAGCAAGTTTAAATAAGGCTAGTCCGTTATCAACTTGAAAAAGTGGCACCGAGTCGGTGCTTTTTT
4|sgACAD11_1|ACAD11	CCACTCCGATAGCTGTTGCA	0	0	1313	978	1518	1200	892	600	0	0	1470	831	1366	2005	1137	640	3122	84129	ACAD11	ACAD11	4|sg_hACAD11_01|ACAD11	ACAD11	ACCGCCACTCCGATAGCTGTTGCAGTTTAAGAGCTATGCTGGAAACAGCATAGCAAGTTTAAATAAGGCTAGTCCGTTATCAACTTGAAAAAGTGGCACCGAGTCGGTGCTTTTTT
4|sgACAD11_2|ACAD11	CCTTGGCCAAAAGTAGAACA	0	0	1435	1020	0	856	338	763	18849	0	1140	511	3265	1	780	959	2226	84129	ACAD11	ACAD11	4|sg_hACAD11_02|ACAD11	ACAD11	ACCGCCTTGGCCAAAAGTAGAACAGTTTAAGAGCTATGCTGGAAACAGCATAGCAAGTTTAAATAAGGCTAGTCCGTTATCAACTTGAAAAAGTGGCACCGAGTCGGTGCTTTTTT
4|sgACAD11_3|ACAD11	CTGAGCCAATGTTTCTACCG	0	0	1432	1389	1	235	955	1021	0	0	1650	714	3330	5	1341	2001	4327	84129	ACAD11	ACAD11	4|sg_hACAD11_03|ACAD11	ACAD11	ACCGCTGAGCCAATGTTTCTACCGGTTTAAGAGCTATGCTGGAAACAGCATAGCAAGTTTAAATAAGGCTAGTCCGTTATCAACTTGAAAAAGTGGCACCGAGTCGGTGCTTTTTT
4|sgACAD11_4|ACAD11	TTGTTTGTACAGACTCGGAA	1	179	1880	1038	841	659	393	744	9546	1137	1122	685	1	0	1100	1389	3228	84129	ACAD11	ACAD11	4|sg_hACAD11_04|ACAD11	ACAD11	ACCGTTGTTTGTACAGACTCGGAAGTTTAAGAGCTATGCTGGAAACAGCATAGCAAGTTTAAATAAGGCTAGTCCGTTATCAACTTGAAAAAGTGGCACCGAGTCGGTGCTTTTTT
4|sgACAD8_1|ACAD8	CAAGGCTTCAAAAATGACAG	0	2881	1218	851	2	999	1101	869	0	0	1241	572	1401	2	759	1207	2781	27034	ACAD8	ACAD8	4|sg_hACAD8_01|ACAD8	ACAD8	ACCGCAAGGCTTCAAAAATGACAGGTTTAAGAGCTATGCTGGAAACAGCATAGCAAGTTTAAATAAGGCTAGTCCGTTATCAACTTGAAAAAGTGGCACCGAGTCGGTGCTTTTTT
4|sgACAD8_2|ACAD8	GCTTCGGAAATGAGGAACAG	0	0	847	764	2	522	814	663	0	0	453	580	0	0	949	980	1967	27034	ACAD8	ACAD8	4|sg_hACAD8_02|ACAD8	ACAD8	ACCGGCTTCGGAAATGAGGAACAGGTTTAAGAGCTATGCTGGAAACAGCATAGCAAGTTTAAATAAGGCTAGTCCGTTATCAACTTGAAAAAGTGGCACCGAGTCGGTGCTTTTTT
4|sgACAD8_3|ACAD8	TCAGTCCTCTCACGGCAATG	0	1003	1269	1177	2	491	1084	500	0	8613	1278	659	1051	2436	1236	1517	2749	27034	ACAD8	ACAD8	4|sg_hACAD8_03|ACAD8	ACAD8	ACCGTCAGTCCTCTCACGGCAATGGTTTAAGAGCTATGCTGGAAACAGCATAGCAAGTTTAAATAAGGCTAGTCCGTTATCAACTTGAAAAAGTGGCACCGAGTCGGTGCTTTTTT
4|sgACAD8_4|ACAD8	TCGAAGATCACAGCTCGTGT	942	1563	861	540	0	496	660	827	0	1570	1913	447	0	0	1262	879	2283	27034	ACAD8	ACAD8	4|sg_hACAD8_04|ACAD8	ACAD8	ACCGTCGAAGATCACAGCTCGTGTGTTTAAGAGCTATGCTGGAAACAGCATAGCAAGTTTAAATAAGGCTAGTCCGTTATCAACTTGAAAAAGTGGCACCGAGTCGGTGCTTTTTT
4|sgACAD9_1|ACAD9	CACCATGTACTCAAGACTAG	5555	1	971	704	0	322	173	381	1	0	1455	454	0	0	1057	299	3555	28976	ACAD9	ACAD9	4|sg_hACAD9_01|ACAD9	ACAD9	ACCGCACCATGTACTCAAGACTAGGTTTAAGAGCTATGCTGGAAACAGCATAGCAAGTTTAAATAAGGCTAGTCCGTTATCAACTTGAAAAAGTGGCACCGAGTCGGTGCTTTTTT
4|sgACAD9_2|ACAD9	CTTGCCTAAACTGGCGTCCG	0	1438	1542	1370	1733	544	416	662	0	0	1275	349	0	265	967	1558	5372	28976	ACAD9	ACAD9	4|sg_hACAD9_02|ACAD9	ACAD9	ACCGCTTGCCTAAACTGGCGTCCGGTTTAAGAGCTATGCTGGAAACAGCATAGCAAGTTTAAATAAGGCTAGTCCGTTATCAACTTGAAAAAGTGGCACCGAGTCGGTGCTTTTTT
4|sgACAD9_3|ACAD9	GAAGATAAATTAGGCATTCG	5072	1236	683	479	0	0	675	379	0	0	686	213	0	0	966	1141	2336	28976	ACAD9	ACAD9	4|sg_hACAD9_03|ACAD9	ACAD9	ACCGGAAGATAAATTAGGCATTCGGTTTAAGAGCTATGCTGGAAACAGCATAGCAAGTTTAAATAAGGCTAGTCCGTTATCAACTTGAAAAAGTGGCACCGAGTCGGTGCTTTTTT
4|sgACAD9_4|ACAD9	GGACTCCCGAAAAATTGACC	0	0	152	135	0	0	275	45	0	0	436	94	439	1	205	155	1416	28976	ACAD9	ACAD9	4|sg_hACAD9_04|ACAD9	ACAD9	ACCGGGACTCCCGAAAAATTGACCGTTTAAGAGCTATGCTGGAAACAGCATAGCAAGTTTAAATAAGGCTAGTCCGTTATCAACTTGAAAAAGTGGCACCGAGTCGGTGCTTTTTT
4|sgACADL_1|ACADL	CAGAAAAAGGCTAATACCAT	0	979	1012	1016	1024	480	526	820	18147	3	1573	663	1	0	718	1722	3353	33	ACADL	ACADL	4|sg_hACADL_01|ACADL	ACADL	ACCGCAGAAAAAGGCTAATACCATGTTTAAGAGCTATGCTGGAAACAGCATAGCAAGTTTAAATAAGGCTAGTCCGTTATCAACTTGAAAAAGTGGCACCGAGTCGGTGCTTTTTT
4|sgACADL_2|ACADL	CTCCTCCCAGACAATAGCTG	1	0	349	360	0	0	575	700	0	0	549	459	2846	4	613	1129	1760	33	ACADL	ACADL	4|sg_hACADL_02|ACADL	ACADL	ACCGCTCCTCCCAGACAATAGCTGGTTTAAGAGCTATGCTGGAAACAGCATAGCAAGTTTAAATAAGGCTAGTCCGTTATCAACTTGAAAAAGTGGCACCGAGTCGGTGCTTTTTT
4|sgACADL_3|ACADL	GCCACTTACTCTGAGTGATG	0	2398	720	559	0	209	226	482	0	0	422	470	3022	3	820	1001	2073	33	ACADL	ACADL	4|sg_hACADL_03|ACADL	ACADL	ACCGGCCACTTACTCTGAGTGATGGTTTAAGAGCTATGCTGGAAACAGCATAGCAAGTTTAAATAAGGCTAGTCCGTTATCAACTTGAAAAAGTGGCACCGAGTCGGTGCTTTTTT
4|sgACADL_4|ACADL	TAAAATGGGATTAAAAGCCC	0	0	262	317	0	267	0	242	0	0	479	167	0	0	315	1338	1234	33	ACADL	ACADL	4|sg_hACADL_04|ACADL	ACADL	ACCGTAAAATGGGATTAAAAGCCCGTTTAAGAGCTATGCTGGAAACAGCATAGCAAGTTTAAATAAGGCTAGTCCGTTATCAACTTGAAAAAGTGGCACCGAGTCGGTGCTTTTTT
4|sgACADM_1|ACADM	AAGATGTGGATAACCAACGG	0	510	447	667	1	0	449	630	0	0	619	567	1595	1367	877	1204	2811	34	ACADM	ACADM	4|sg_hACADM_01|ACADM	ACADM	ACCGAAGATGTGGATAACCAACGGGTTTAAGAGCTATGCTGGAAACAGCATAGCAAGTTTAAATAAGGCTAGTCCGTTATCAACTTGAAAAAGTGGCACCGAGTCGGTGCTTTTTT
4|sgACADM_2|ACADM	AATTGGCTTATGGATGTACA	0	1276	1088	937	1	0	242	548	1	2	1184	738	1	1873	1616	1517	3288	34	ACADM	ACADM	4|sg_hACADM_02|ACADM	ACADM	ACCGAATTGGCTTATGGATGTACAGTTTAAGAGCTATGCTGGAAACAGCATAGCAAGTTTAAATAAGGCTAGTCCGTTATCAACTTGAAAAAGTGGCACCGAGTCGGTGCTTTTTT
4|sgACADM_3|ACADM	ATTGTGGAAGCAGATACCCC	0	0	1450	837	1	367	891	922	0	3500	1593	883	2843	3	941	2688	3638	34	ACADM	ACADM	4|sg_hACADM_03|ACADM	ACADM	ACCGATTGTGGAAGCAGATACCCCGTTTAAGAGCTATGCTGGAAACAGCATAGCAAGTTTAAATAAGGCTAGTCCGTTATCAACTTGAAAAAGTGGCACCGAGTCGGTGCTTTTTT
4|sgACADM_4|ACADM	GTATTTGGGGAGAATGACTG	2169	1	706	690	1	0	595	319	0	0	988	288	1	1635	836	788	2210	34	ACADM	ACADM	4|sg_hACADM_04|ACADM	ACADM	ACCGGTATTTGGGGAGAATGACTGGTTTAAGAGCTATGCTGGAAACAGCATAGCAAGTTTAAATAAGGCTAGTCCGTTATCAACTTGAAAAAGTGGCACCGAGTCGGTGCTTTTTT
4|sgACADS_1|ACADS	ACACACCATCTACCAGTCTG	3416	533	2943	2408	1647	2600	1967	1552	10827	6672	3767	2069	1331	4330	4569	4301	7328	35	ACADS	ACADS	4|sg_hACADS_01|ACADS	ACADS	ACCGACACACCATCTACCAGTCTGGTTTAAGAGCTATGCTGGAAACAGCATAGCAAGTTTAAATAAGGCTAGTCCGTTATCAACTTGAAAAAGTGGCACCGAGTCGGTGCTTTTTT
4|sgACADS_2|ACADS	GACACTCATGATGACTCCGG	1	804	441	418	1	410	128	450	0	0	374	161	1961	1	640	803	2304	35	ACADS	ACADS	4|sg_hACADS_02|ACADS	ACADS	ACCGGACACTCATGATGACTCCGGGTTTAAGAGCTATGCTGGAAACAGCATAGCAAGTTTAAATAAGGCTAGTCCGTTATCAACTTGAAAAAGTGGCACCGAGTCGGTGCTTTTTT
4|sgACADS_3|ACADS	GGCAGGTACCTGGTTCGCTG	0	2062	1633	2010	1388	1412	726	1695	0	0	1531	672	2510	3665	1954	2247	4325	35	ACADS	ACADS	4|sg_hACADS_03|ACADS	ACADS	ACCGGGCAGGTACCTGGTTCGCTGGTTTAAGAGCTATGCTGGAAACAGCATAGCAAGTTTAAATAAGGCTAGTCCGTTATCAACTTGAAAAAGTGGCACCGAGTCGGTGCTTTTTT
4|sgACADS_4|ACADS	TAAGGAACATCTCTTCCCAG	0	1221	659	447	2	669	940	881	9892	1269	790	347	2021	1520	656	473	2131	35	ACADS	ACADS	4|sg_hACADS_04|ACADS	ACADS	ACCGTAAGGAACATCTCTTCCCAGGTTTAAGAGCTATGCTGGAAACAGCATAGCAAGTTTAAATAAGGCTAGTCCGTTATCAACTTGAAAAAGTGGCACCGAGTCGGTGCTTTTTT
4|sgACADSB_1|ACADSB	AGCCAAAGTTGATGCATCTG	2984	0	603	575	0	286	313	420	0	0	401	516	1	2134	518	361	2848	36	ACADSB	ACADSB	4|sg_hACADSB_01|ACADSB	ACADSB	ACCGAGCCAAAGTTGATGCATCTGGTTTAAGAGCTATGCTGGAAACAGCATAGCAAGTTTAAATAAGGCTAGTCCGTTATCAACTTGAAAAAGTGGCACCGAGTCGGTGCTTTTTT
4|sgACADSB_2|ACADSB	ATGGAGAAATCAGTAATACA	5326	1477	2267	2146	2	1434	1504	1211	16823	5178	2428	851	9879	3931	2272	3784	5765	36	ACADSB	ACADSB	4|sg_hACADSB_02|ACADSB	ACADSB	ACCGATGGAGAAATCAGTAATACAGTTTAAGAGCTATGCTGGAAACAGCATAGCAAGTTTAAATAAGGCTAGTCCGTTATCAACTTGAAAAAGTGGCACCGAGTCGGTGCTTTTTT
4|sgACADSB_3|ACADSB	ATTGAGTAGAGCTTCTGACT	0	548	553	671	2	0	8	135	25273	1	1126	318	1	997	957	181	2248	36	ACADSB	ACADSB	4|sg_hACADSB_03|ACADSB	ACADSB	ACCGATTGAGTAGAGCTTCTGACTGTTTAAGAGCTATGCTGGAAACAGCATAGCAAGTTTAAATAAGGCTAGTCCGTTATCAACTTGAAAAAGTGGCACCGAGTCGGTGCTTTTTT
4|sgACADSB_4|ACADSB	TTCGAATGTTAACGGGCAGG	0	2235	1086	725	2502	752	1748	470	0	0	789	727	6528	1117	1128	1318	3163	36	ACADSB	ACADSB	4|sg_hACADSB_04|ACADSB	ACADSB	ACCGTTCGAATGTTAACGGGCAGGGTTTAAGAGCTATGCTGGAAACAGCATAGCAAGTTTAAATAAGGCTAGTCCGTTATCAACTTGAAAAAGTGGCACCGAGTCGGTGCTTTTTT
4|sgACADVL_1|ACADVL	CACTAATCGTACCCAGTTTG	0	725	695	1263	0	0	339	299	0	0	826	336	1668	2083	1110	1780	2979	37	ACADVL	ACADVL	4|sg_hACADVL_01|ACADVL	ACADVL	ACCGCACTAATCGTACCCAGTTTGGTTTAAGAGCTATGCTGGAAACAGCATAGCAAGTTTAAATAAGGCTAGTCCGTTATCAACTTGAAAAAGTGGCACCGAGTCGGTGCTTTTTT
4|sgACADVL_2|ACADVL	GTCTAACCGAGCCCTCAAGC	1	1	1029	405	3	186	14	582	0	0	1207	434	0	2415	269	665	2177	37	ACADVL	ACADVL	4|sg_hACADVL_02|ACADVL	ACADVL	ACCGGTCTAACCGAGCCCTCAAGCGTTTAAGAGCTATGCTGGAAACAGCATAGCAAGTTTAAATAAGGCTAGTCCGTTATCAACTTGAAAAAGTGGCACCGAGTCGGTGCTTTTTT
4|sgACADVL_3|ACADVL	TCCTGGTCAGAGCGTCAGAG	0	1173	1543	1493	3	372	705	1007	0	2284	1606	584	2248	1113	844	1560	2664	37	ACADVL	ACADVL	4|sg_hACADVL_03|ACADVL	ACADVL	ACCGTCCTGGTCAGAGCGTCAGAGGTTTAAGAGCTATGCTGGAAACAGCATAGCAAGTTTAAATAAGGCTAGTCCGTTATCAACTTGAAAAAGTGGCACCGAGTCGGTGCTTTTTT
4|sgACADVL_4|ACADVL	TGTCTAACCGAGCCCTCAAG	0	946	704	749	0	955	399	590	0	0	1566	583	2918	1	1273	483	2685	37	ACADVL	ACADVL	4|sg_hACADVL_04|ACADVL	ACADVL	ACCGTGTCTAACCGAGCCCTCAAGGTTTAAGAGCTATGCTGGAAACAGCATAGCAAGTTTAAATAAGGCTAGTCCGTTATCAACTTGAAAAAGTGGCACCGAGTCGGTGCTTTTTT
4|sgACAN_1|ACAN	CAGCGGTCACCTGCACGACG	1539	527	1296	1532	1	975	498	1127	9384	4007	1190	320	1	0	1911	1865	3028	176	ACAN	ACAN	4|sg_hACAN_01|ACAN	ACAN	ACCGCAGCGGTCACCTGCACGACGGTTTAAGAGCTATGCTGGAAACAGCATAGCAAGTTTAAATAAGGCTAGTCCGTTATCAACTTGAAAAAGTGGCACCGAGTCGGTGCTTTTTT
4|sgACAN_2|ACAN	CCTGCGCTCCAATGACTCTG	0	0	1041	594	1	220	653	280	0	1	1502	732	1	1020	994	1376	2119	176	ACAN	ACAN	4|sg_hACAN_02|ACAN	ACAN	ACCGCCTGCGCTCCAATGACTCTGGTTTAAGAGCTATGCTGGAAACAGCATAGCAAGTTTAAATAAGGCTAGTCCGTTATCAACTTGAAAAAGTGGCACCGAGTCGGTGCTTTTTT
4|sgACAN_3|ACAN	GAACCAGCCTATACCCCAGT	0	2329	1676	916	0	740	1012	933	0	0	1109	983	6282	3	1138	1210	4528	176	ACAN	ACAN	4|sg_hACAN_03|ACAN	ACAN	ACCGGAACCAGCCTATACCCCAGTGTTTAAGAGCTATGCTGGAAACAGCATAGCAAGTTTAAATAAGGCTAGTCCGTTATCAACTTGAAAAAGTGGCACCGAGTCGGTGCTTTTTT
4|sgACAN_4|ACAN	GAGGGCAGTTCACCAACCGT	0	397	653	829	0	0	138	795	0	1	1642	612	1782	3094	1181	1165	2702	176	ACAN	ACAN	4|sg_hACAN_04|ACAN	ACAN	ACCGGAGGGCAGTTCACCAACCGTGTTTAAGAGCTATGCTGGAAACAGCATAGCAAGTTTAAATAAGGCTAGTCCGTTATCAACTTGAAAAAGTGGCACCGAGTCGGTGCTTTTTT
4|sgACAP1_1|ACAP1	AGGTCTGCGGGGTTTCCGAG	2054	512	1531	1570	2182	590	678	661	0	7381	1539	776	1	0	1333	1459	2436	9744	ACAP1	ACAP1	4|sg_hACAP1_01|ACAP1	ACAP1	ACCGAGGTCTGCGGGGTTTCCGAGGTTTAAGAGCTATGCTGGAAACAGCATAGCAAGTTTAAATAAGGCTAGTCCGTTATCAACTTGAAAAAGTGGCACCGAGTCGGTGCTTTTTT
4|sgACAP1_2|ACAP1	CAGAACCAAGCTTAAGAGAG	0	0	996	706	1	1237	497	618	0	1003	1404	592	4107	4	1254	735	2541	9744	ACAP1	ACAP1	4|sg_hACAP1_02|ACAP1	ACAP1	ACCGCAGAACCAAGCTTAAGAGAGGTTTAAGAGCTATGCTGGAAACAGCATAGCAAGTTTAAATAAGGCTAGTCCGTTATCAACTTGAAAAAGTGGCACCGAGTCGGTGCTTTTTT
4|sgACAP1_3|ACAP1	GTCACAAATGCCGACAACGA	10482	2367	2418	2051	0	2139	1022	1530	0	1343	2356	1097	4618	5921	1857	3112	5389	9744	ACAP1	ACAP1	4|sg_hACAP1_03|ACAP1	ACAP1	ACCGGTCACAAATGCCGACAACGAGTTTAAGAGCTATGCTGGAAACAGCATAGCAAGTTTAAATAAGGCTAGTCCGTTATCAACTTGAAAAAGTGGCACCGAGTCGGTGCTTTTTT
4|sgACAP1_4|ACAP1	TGCCGGAACACTGAATGCAG	0	487	1087	957	2	731	2371	1385	7438	0	1151	932	2007	3951	1166	1476	3937	9744	ACAP1	ACAP1	4|sg_hACAP1_04|ACAP1	ACAP1	ACCGTGCCGGAACACTGAATGCAGGTTTAAGAGCTATGCTGGAAACAGCATAGCAAGTTTAAATAAGGCTAGTCCGTTATCAACTTGAAAAAGTGGCACCGAGTCGGTGCTTTTTT
4|sgACAP2_1|ACAP2	ACTATAGGATAATCCGACTG	0	1163	617	407	0	0	95	342	0	1	1074	491	0	0	695	745	2320	23527	ACAP2	ACAP2	4|sg_hACAP2_01|ACAP2	ACAP2	ACCGACTATAGGATAATCCGACTGGTTTAAGAGCTATGCTGGAAACAGCATAGCAAGTTTAAATAAGGCTAGTCCGTTATCAACTTGAAAAAGTGGCACCGAGTCGGTGCTTTTTT
4|sgACAP2_2|ACAP2	ATATATCAGAGCAAAATATG	2659	994	1916	1718	2658	2747	1550	1125	0	0	1720	826	4371	3496	1962	2704	4776	23527	ACAP2	ACAP2	4|sg_hACAP2_02|ACAP2	ACAP2	ACCGATATATCAGAGCAAAATATGGTTTAAGAGCTATGCTGGAAACAGCATAGCAAGTTTAAATAAGGCTAGTCCGTTATCAACTTGAAAAAGTGGCACCGAGTCGGTGCTTTTTT
4|sgACAP2_3|ACAP2	TCCGGAGCACTCGATACACA	0	1666	1396	736	1379	672	1003	922	0	2359	1570	992	0	1368	980	2271	2715	23527	ACAP2	ACAP2	4|sg_hACAP2_03|ACAP2	ACAP2	ACCGTCCGGAGCACTCGATACACAGTTTAAGAGCTATGCTGGAAACAGCATAGCAAGTTTAAATAAGGCTAGTCCGTTATCAACTTGAAAAAGTGGCACCGAGTCGGTGCTTTTTT
4|sgACAP2_4|ACAP2	TGAACTTGGACCCTACATGA	2073	1474	1246	806	2	638	365	486	0	0	879	589	0	0	1062	969	2789	23527	ACAP2	ACAP2	4|sg_hACAP2_04|ACAP2	ACAP2	ACCGTGAACTTGGACCCTACATGAGTTTAAGAGCTATGCTGGAAACAGCATAGCAAGTTTAAATAAGGCTAGTCCGTTATCAACTTGAAAAAGTGGCACCGAGTCGGTGCTTTTTT
4|sgACAP3_1|ACAP3	CCTCGCTATAGCAACTGTCA	3103	0	835	452	1	770	35	417	16325	4373	1294	602	0	0	594	681	2271	116983	ACAP3	ACAP3	4|sg_hACAP3_01|ACAP3	ACAP3	ACCGCCTCGCTATAGCAACTGTCAGTTTAAGAGCTATGCTGGAAACAGCATAGCAAGTTTAAATAAGGCTAGTCCGTTATCAACTTGAAAAAGTGGCACCGAGTCGGTGCTTTTTT
4|sgACAP3_2|ACAP3	CTCCACTTTGGACTCATCGT	0	1	925	564	2180	1	398	227	0	1079	461	239	0	0	507	498	2148	116983	ACAP3	ACAP3	4|sg_hACAP3_02|ACAP3	ACAP3	ACCGCTCCACTTTGGACTCATCGTGTTTAAGAGCTATGCTGGAAACAGCATAGCAAGTTTAAATAAGGCTAGTCCGTTATCAACTTGAAAAAGTGGCACCGAGTCGGTGCTTTTTT
4|sgACAP3_3|ACAP3	CTGGATCAAGGACAAATACG	0	971	1710	1070	1	810	614	975	8832	0	1746	1100	2783	2	1079	640	3441	116983	ACAP3	ACAP3	4|sg_hACAP3_03|ACAP3	ACAP3	ACCGCTGGATCAAGGACAAATACGGTTTAAGAGCTATGCTGGAAACAGCATAGCAAGTTTAAATAAGGCTAGTCCGTTATCAACTTGAAAAAGTGGCACCGAGTCGGTGCTTTTTT
4|sgACAP3_4|ACAP3	GTTCGCTGACAGCCTACAGG	7198	864	926	939	2418	0	763	565	0	1	1055	371	1063	1648	759	1642	3277	116983	ACAP3	ACAP3	4|sg_hACAP3_04|ACAP3	ACAP3	ACCGGTTCGCTGACAGCCTACAGGGTTTAAGAGCTATGCTGGAAACAGCATAGCAAGTTTAAATAAGGCTAGTCCGTTATCAACTTGAAAAAGTGGCACCGAGTCGGTGCTTTTTT
4|sgACAT1_1|ACAT1	CTGCCTAAAAAAGATCCAAT	0	351	803	523	1413	237	294	326	0	0	715	394	1	1235	959	1300	1597	38	ACAT1	ACAT1	4|sg_hACAT1_01|ACAT1	ACAT1	ACCGCTGCCTAAAAAAGATCCAATGTTTAAGAGCTATGCTGGAAACAGCATAGCAAGTTTAAATAAGGCTAGTCCGTTATCAACTTGAAAAAGTGGCACCGAGTCGGTGCTTTTTT
4|sgACAT1_2|ACAT1	GAAGTGAAAGAAGCATACAT	6322	1325	1629	1246	3	384	715	964	0	5129	1358	941	1	2480	1537	2568	4031	38	ACAT1	ACAT1	4|sg_hACAT1_02|ACAT1	ACAT1	ACCGGAAGTGAAAGAAGCATACATGTTTAAGAGCTATGCTGGAAACAGCATAGCAAGTTTAAATAAGGCTAGTCCGTTATCAACTTGAAAAAGTGGCACCGAGTCGGTGCTTTTTT
4|sgACAT1_3|ACAT1	GAGGATCAACACCATATGGT	2330	624	993	1008	20	741	655	817	1	1875	688	510	0	0	980	890	3302	38	ACAT1	ACAT1	4|sg_hACAT1_03|ACAT1	ACAT1	ACCGGAGGATCAACACCATATGGTGTTTAAGAGCTATGCTGGAAACAGCATAGCAAGTTTAAATAAGGCTAGTCCGTTATCAACTTGAAAAAGTGGCACCGAGTCGGTGCTTTTTT
4|sgACAT1_4|ACAT1	TTCTGCGCAGGATGTGATGG	1	842	962	575	0	412	1357	417	0	3089	1397	589	0	0	956	907	2215	38	ACAT1	ACAT1	4|sg_hACAT1_04|ACAT1	ACAT1	ACCGTTCTGCGCAGGATGTGATGGGTTTAAGAGCTATGCTGGAAACAGCATAGCAAGTTTAAATAAGGCTAGTCCGTTATCAACTTGAAAAAGTGGCACCGAGTCGGTGCTTTTTT
4|sgACAT2_1|ACAT2	CCTGTTAGACAAGCCAGTGT	740	964	839	1040	1180	456	374	680	0	1308	853	360	1	3516	962	1359	3099	39	ACAT2	ACAT2	4|sg_hACAT2_01|ACAT2	ACAT2	ACCGCCTGTTAGACAAGCCAGTGTGTTTAAGAGCTATGCTGGAAACAGCATAGCAAGTTTAAATAAGGCTAGTCCGTTATCAACTTGAAAAAGTGGCACCGAGTCGGTGCTTTTTT
4|sgACAT2_2|ACAT2	GCAGTCCAGTCAATAGGGAT	0	440	770	889	1121	841	901	1006	1	1068	1314	490	1	2910	978	848	2621	39	ACAT2	ACAT2	4|sg_hACAT2_02|ACAT2	ACAT2	ACCGGCAGTCCAGTCAATAGGGATGTTTAAGAGCTATGCTGGAAACAGCATAGCAAGTTTAAATAAGGCTAGTCCGTTATCAACTTGAAAAAGTGGCACCGAGTCGGTGCTTTTTT
4|sgACAT2_3|ACAT2	GTTCTCAAGTAAGCCAAGTG	0	920	1253	1101	0	1349	232	899	0	6525	1667	983	2	0	1577	889	3095	39	ACAT2	ACAT2	4|sg_hACAT2_03|ACAT2	ACAT2	ACCGGTTCTCAAGTAAGCCAAGTGGTTTAAGAGCTATGCTGGAAACAGCATAGCAAGTTTAAATAAGGCTAGTCCGTTATCAACTTGAAAAAGTGGCACCGAGTCGGTGCTTTTTT
4|sgACAT2_4|ACAT2	TCTATGTTGCTCCCATGGCG	2971	1568	1201	1023	3	751	728	702	0	0	749	426	2268	975	1001	1069	3151	39	ACAT2	ACAT2	4|sg_hACAT2_04|ACAT2	ACAT2	ACCGTCTATGTTGCTCCCATGGCGGTTTAAGAGCTATGCTGGAAACAGCATAGCAAGTTTAAATAAGGCTAGTCCGTTATCAACTTGAAAAAGTGGCACCGAGTCGGTGCTTTTTT
4|sgACBD3_1|ACBD3	AAGAGAACGTCTGCAAAAGG	1	2886	643	773	1914	936	693	548	0	2309	998	408	2962	2	693	1346	2234	64746	ACBD3	ACBD3	4|sg_hACBD3_01|ACBD3	ACBD3	ACCGAAGAGAACGTCTGCAAAAGGGTTTAAGAGCTATGCTGGAAACAGCATAGCAAGTTTAAATAAGGCTAGTCCGTTATCAACTTGAAAAAGTGGCACCGAGTCGGTGCTTTTTT
4|sgACBD3_2|ACBD3	ACATCAAAGAATCCAACCTC	1	563	973	1249	1	206	553	470	5603	4173	1748	931	3	655	1483	3685	2655	64746	ACBD3	ACBD3	4|sg_hACBD3_02|ACBD3	ACBD3	ACCGACATCAAAGAATCCAACCTCGTTTAAGAGCTATGCTGGAAACAGCATAGCAAGTTTAAATAAGGCTAGTCCGTTATCAACTTGAAAAAGTGGCACCGAGTCGGTGCTTTTTT
4|sgACBD3_3|ACBD3	GGGCCGCGACCGGATCCAGG	0	1	867	808	2	419	1361	458	0	1423	1030	465	0	2382	804	875	2259	64746	ACBD3	ACBD3	4|sg_hACBD3_03|ACBD3	ACBD3	ACCGGGGCCGCGACCGGATCCAGGGTTTAAGAGCTATGCTGGAAACAGCATAGCAAGTTTAAATAAGGCTAGTCCGTTATCAACTTGAAAAAGTGGCACCGAGTCGGTGCTTTTTT
4|sgACBD3_4|ACBD3	TGCGTCCCACAAAATAGAGA	0	3551	1532	1554	0	1013	1763	1039	16334	2187	1357	1045	1	1437	2103	1645	5335	64746	ACBD3	ACBD3	4|sg_hACBD3_04|ACBD3	ACBD3	ACCGTGCGTCCCACAAAATAGAGAGTTTAAGAGCTATGCTGGAAACAGCATAGCAAGTTTAAATAAGGCTAGTCCGTTATCAACTTGAAAAAGTGGCACCGAGTCGGTGCTTTTTT
4|sgACBD4_1|ACBD4	ACCACTTATATCGTCCAATG	0	1197	978	955	5	791	1384	926	0	0	919	1054	7269	5453	971	1142	3176	79777	ACBD4	ACBD4	4|sg_hACBD4_01|ACBD4	ACBD4	ACCGACCACTTATATCGTCCAATGGTTTAAGAGCTATGCTGGAAACAGCATAGCAAGTTTAAATAAGGCTAGTCCGTTATCAACTTGAAAAAGTGGCACCGAGTCGGTGCTTTTTT
4|sgACBD4_2|ACBD4	AGGTGATCCCTGACATGCCG	0	889	1056	897	857	458	1154	648	0	0	1021	364	1859	0	1493	1367	2740	79777	ACBD4	ACBD4	4|sg_hACBD4_02|ACBD4	ACBD4	ACCGAGGTGATCCCTGACATGCCGGTTTAAGAGCTATGCTGGAAACAGCATAGCAAGTTTAAATAAGGCTAGTCCGTTATCAACTTGAAAAAGTGGCACCGAGTCGGTGCTTTTTT
4|sgACBD4_3|ACBD4	CAGGGAATCACAGAAAACCT	0	3961	1861	1285	2	495	996	750	9099	0	1582	484	1971	2	1101	2117	4147	79777	ACBD4	ACBD4	4|sg_hACBD4_03|ACBD4	ACBD4	ACCGCAGGGAATCACAGAAAACCTGTTTAAGAGCTATGCTGGAAACAGCATAGCAAGTTTAAATAAGGCTAGTCCGTTATCAACTTGAAAAAGTGGCACCGAGTCGGTGCTTTTTT
4|sgACBD4_4|ACBD4	GTGATCGACACAGTGCCCCT	0	837	962	669	1	564	32	598	0	1	1454	498	0	0	1302	400	2816	79777	ACBD4	ACBD4	4|sg_hACBD4_04|ACBD4	ACBD4	ACCGGTGATCGACACAGTGCCCCTGTTTAAGAGCTATGCTGGAAACAGCATAGCAAGTTTAAATAAGGCTAGTCCGTTATCAACTTGAAAAAGTGGCACCGAGTCGGTGCTTTTTT
4|sgACBD5_1|ACBD5	ACTGGGTGATATGACCAAAG	0	1700	915	1276	1758	550	1371	736	0	3508	1412	1028	1833	1038	1574	1857	3235	91452	ACBD5	ACBD5	4|sg_hACBD5_01|ACBD5	ACBD5	ACCGACTGGGTGATATGACCAAAGGTTTAAGAGCTATGCTGGAAACAGCATAGCAAGTTTAAATAAGGCTAGTCCGTTATCAACTTGAAAAAGTGGCACCGAGTCGGTGCTTTTTT
4|sgACBD5_2|ACBD5	AGCCCATTGATGAAAACTTG	0	445	781	919	0	398	674	723	0	0	1091	639	0	0	882	323	2492	91452	ACBD5	ACBD5	4|sg_hACBD5_02|ACBD5	ACBD5	ACCGAGCCCATTGATGAAAACTTGGTTTAAGAGCTATGCTGGAAACAGCATAGCAAGTTTAAATAAGGCTAGTCCGTTATCAACTTGAAAAAGTGGCACCGAGTCGGTGCTTTTTT
4|sgACBD5_3|ACBD5	AGGTAAAATAGTCCAACCTG	4770	447	961	639	0	186	200	491	0	1	929	446	2904	1028	707	1077	1839	91452	ACBD5	ACBD5	4|sg_hACBD5_03|ACBD5	ACBD5	ACCGAGGTAAAATAGTCCAACCTGGTTTAAGAGCTATGCTGGAAACAGCATAGCAAGTTTAAATAAGGCTAGTCCGTTATCAACTTGAAAAAGTGGCACCGAGTCGGTGCTTTTTT
4|sgACBD5_4|ACBD5	TGGTCATTCCAGTCAACCCA	5716	377	1238	1290	2913	1045	1724	1011	0	942	2116	1126	1	351	1916	1711	4075	91452	ACBD5	ACBD5	4|sg_hACBD5_04|ACBD5	ACBD5	ACCGTGGTCATTCCAGTCAACCCAGTTTAAGAGCTATGCTGGAAACAGCATAGCAAGTTTAAATAAGGCTAGTCCGTTATCAACTTGAAAAAGTGGCACCGAGTCGGTGCTTTTTT
4|sgACBD6_1|ACBD6	AAATATATTTGATTACTGCA	1868	1727	455	579	0	234	625	244	0	0	227	334	0	0	311	963	1261	84320	ACBD6	ACBD6	4|sg_hACBD6_01|ACBD6	ACBD6	ACCGAAATATATTTGATTACTGCAGTTTAAGAGCTATGCTGGAAACAGCATAGCAAGTTTAAATAAGGCTAGTCCGTTATCAACTTGAAAAAGTGGCACCGAGTCGGTGCTTTTTT
4|sgACBD6_2|ACBD6	AGCCATCAAATCGAAAAATG	0	1072	1500	1748	0	253	1470	596	2	10250	1159	426	4192	1993	1701	1656	3165	84320	ACBD6	ACBD6	4|sg_hACBD6_02|ACBD6	ACBD6	ACCGAGCCATCAAATCGAAAAATGGTTTAAGAGCTATGCTGGAAACAGCATAGCAAGTTTAAATAAGGCTAGTCCGTTATCAACTTGAAAAAGTGGCACCGAGTCGGTGCTTTTTT
4|sgACBD6_3|ACBD6	CCTCGATCTCAGGGCTATGG	0	1018	558	502	1	366	529	508	0	6817	1304	421	3531	2307	739	2223	3036	84320	ACBD6	ACBD6	4|sg_hACBD6_03|ACBD6	ACBD6	ACCGCCTCGATCTCAGGGCTATGGGTTTAAGAGCTATGCTGGAAACAGCATAGCAAGTTTAAATAAGGCTAGTCCGTTATCAACTTGAAAAAGTGGCACCGAGTCGGTGCTTTTTT
4|sgACBD6_4|ACBD6	TTAAAAAACTAGATCCAGGT	0	1531	508	552	1	292	803	708	0	1	573	419	0	608	1056	815	2061	84320	ACBD6	ACBD6	4|sg_hACBD6_04|ACBD6	ACBD6	ACCGTTAAAAAACTAGATCCAGGTGTTTAAGAGCTATGCTGGAAACAGCATAGCAAGTTTAAATAAGGCTAGTCCGTTATCAACTTGAAAAAGTGGCACCGAGTCGGTGCTTTTTT
4|sgACBD7_1|ACBD7	ACAGGGCTGCAGAAGATGTG	0	2060	1847	1392	3	603	737	1357	16264	0	1641	1114	2373	2	1828	1767	3687	414149	ACBD7	ACBD7	4|sg_hACBD7_01|ACBD7	ACBD7	ACCGACAGGGCTGCAGAAGATGTGGTTTAAGAGCTATGCTGGAAACAGCATAGCAAGTTTAAATAAGGCTAGTCCGTTATCAACTTGAAAAAGTGGCACCGAGTCGGTGCTTTTTT
4|sgACBD7_2|ACBD7	CTGAAAGCAAGACCAGATGA	0	335	1530	1302	0	921	984	1157	0	3468	1650	632	0	0	1234	1741	3074	414149	ACBD7	ACBD7	4|sg_hACBD7_02|ACBD7	ACBD7	ACCGCTGAAAGCAAGACCAGATGAGTTTAAGAGCTATGCTGGAAACAGCATAGCAAGTTTAAATAAGGCTAGTCCGTTATCAACTTGAAAAAGTGGCACCGAGTCGGTGCTTTTTT
4|sgACBD7_3|ACBD7	GAGAACTGAAAGAACTCTAT	0	0	290	390	0	317	518	474	0	0	897	212	0	0	268	237	1823	414149	ACBD7	ACBD7	4|sg_hACBD7_03|ACBD7	ACBD7	ACCGGAGAACTGAAAGAACTCTATGTTTAAGAGCTATGCTGGAAACAGCATAGCAAGTTTAAATAAGGCTAGTCCGTTATCAACTTGAAAAAGTGGCACCGAGTCGGTGCTTTTTT
4|sgACBD7_4|ACBD7	GCAAAGCCAAATGGGAAGCA	0	661	2997	2626	1418	550	2335	2439	1	11030	3276	1991	2432	6324	2935	4330	6583	414149	ACBD7	ACBD7	4|sg_hACBD7_04|ACBD7	ACBD7	ACCGGCAAAGCCAAATGGGAAGCAGTTTAAGAGCTATGCTGGAAACAGCATAGCAAGTTTAAATAAGGCTAGTCCGTTATCAACTTGAAAAAGTGGCACCGAGTCGGTGCTTTTTT
4|sgACCS_1|ACCS	CCCAACAGACTTCTCAAACA	1	2062	1549	1096	1	1512	680	1058	0	4784	1863	1064	3082	3314	1320	1668	4187	84680	ACCS	ACCS	4|sg_hACCS_01|ACCS	ACCS	ACCGCCCAACAGACTTCTCAAACAGTTTAAGAGCTATGCTGGAAACAGCATAGCAAGTTTAAATAAGGCTAGTCCGTTATCAACTTGAAAAAGTGGCACCGAGTCGGTGCTTTTTT
4|sgACCS_2|ACCS	GGGGAGTATACATCACCCAG	2214	893	1162	561	0	766	277	407	0	0	903	422	0	0	341	459	1801	84680	ACCS	ACCS	4|sg_hACCS_02|ACCS	ACCS	ACCGGGGGAGTATACATCACCCAGGTTTAAGAGCTATGCTGGAAACAGCATAGCAAGTTTAAATAAGGCTAGTCCGTTATCAACTTGAAAAAGTGGCACCGAGTCGGTGCTTTTTT
4|sgACCS_3|ACCS	TAGGTGGTTGTCCTGAATGG	0	2521	1090	1009	2	740	305	1289	0	0	1075	501	0	2853	967	1921	2981	84680	ACCS	ACCS	4|sg_hACCS_03|ACCS	ACCS	ACCGTAGGTGGTTGTCCTGAATGGGTTTAAGAGCTATGCTGGAAACAGCATAGCAAGTTTAAATAAGGCTAGTCCGTTATCAACTTGAAAAAGTGGCACCGAGTCGGTGCTTTTTT
4|sgACCS_4|ACCS	TGTGATAGCGCCATAGTAAG	1	1477	789	502	1	1051	128	670	0	0	960	406	2967	1174	885	1948	2210	84680	ACCS	ACCS	4|sg_hACCS_04|ACCS	ACCS	ACCGTGTGATAGCGCCATAGTAAGGTTTAAGAGCTATGCTGGAAACAGCATAGCAAGTTTAAATAAGGCTAGTCCGTTATCAACTTGAAAAAGTGGCACCGAGTCGGTGCTTTTTT
4|sgACCSL_1|ACCSL	AAGTGACATGAACTGCATTG	0	678	969	408	2	2	1203	406	0	1749	422	723	0	0	486	597	1802	390110	ACCSL	ACCSL	4|sg_hACCSL_01|ACCSL	ACCSL	ACCGAAGTGACATGAACTGCATTGGTTTAAGAGCTATGCTGGAAACAGCATAGCAAGTTTAAATAAGGCTAGTCCGTTATCAACTTGAAAAAGTGGCACCGAGTCGGTGCTTTTTT
4|sgACCSL_2|ACCSL	GATCAACCTCCTACAGTCTG	5379	1742	1098	862	1322	46	748	545	0	0	1262	662	0	0	1495	2477	3954	390110	ACCSL	ACCSL	4|sg_hACCSL_02|ACCSL	ACCSL	ACCGGATCAACCTCCTACAGTCTGGTTTAAGAGCTATGCTGGAAACAGCATAGCAAGTTTAAATAAGGCTAGTCCGTTATCAACTTGAAAAAGTGGCACCGAGTCGGTGCTTTTTT
4|sgACCSL_3|ACCSL	TCCCACGGATGGATAGGTCG	0	1719	1337	974	1536	1067	1334	1378	10592	1214	1592	782	4940	6	1455	1309	4905	390110	ACCSL	ACCSL	4|sg_hACCSL_03|ACCSL	ACCSL	ACCGTCCCACGGATGGATAGGTCGGTTTAAGAGCTATGCTGGAAACAGCATAGCAAGTTTAAATAAGGCTAGTCCGTTATCAACTTGAAAAAGTGGCACCGAGTCGGTGCTTTTTT
4|sgACCSL_4|ACCSL	TCTTAGGGGAAAAAGGTCCG	0	272	1008	605	1	573	700	697	0	0	1016	422	1	1756	1330	1131	2049	390110	ACCSL	ACCSL	4|sg_hACCSL_04|ACCSL	ACCSL	ACCGTCTTAGGGGAAAAAGGTCCGGTTTAAGAGCTATGCTGGAAACAGCATAGCAAGTTTAAATAAGGCTAGTCCGTTATCAACTTGAAAAAGTGGCACCGAGTCGGTGCTTTTTT
4|sgACD_1|ACD	AAGCAGCGTGGCCCCGACGT	1559	2504	2109	1619	1627	1156	797	904	0	2695	1496	792	6463	3013	1258	2084	5992	65057	ACD	ACD	4|sg_hACD_01|ACD	ACD	ACCGAAGCAGCGTGGCCCCGACGTGTTTAAGAGCTATGCTGGAAACAGCATAGCAAGTTTAAATAAGGCTAGTCCGTTATCAACTTGAAAAAGTGGCACCGAGTCGGTGCTTTTTT
4|sgACD_2|ACD	AGATGCACAGCATTGAGCTG	0	1360	750	645	1	783	565	630	0	0	586	383	1703	2	685	830	3337	65057	ACD	ACD	4|sg_hACD_02|ACD	ACD	ACCGAGATGCACAGCATTGAGCTGGTTTAAGAGCTATGCTGGAAACAGCATAGCAAGTTTAAATAAGGCTAGTCCGTTATCAACTTGAAAAAGTGGCACCGAGTCGGTGCTTTTTT
4|sgACD_3|ACD	ATCCGCTGGGTGTAGCCGTG	0	1853	1115	786	0	500	854	1164	9520	1197	1025	519	0	0	1401	1204	3663	65057	ACD	ACD	4|sg_hACD_03|ACD	ACD	ACCGATCCGCTGGGTGTAGCCGTGGTTTAAGAGCTATGCTGGAAACAGCATAGCAAGTTTAAATAAGGCTAGTCCGTTATCAACTTGAAAAAGTGGCACCGAGTCGGTGCTTTTTT
4|sgACD_4|ACD	GCTTCTGGATGAAATGCGGG	0	1675	859	1033	0	0	931	259	0	708	1088	368	1556	3623	1248	496	2512	65057	ACD	ACD	4|sg_hACD_04|ACD	ACD	ACCGGCTTCTGGATGAAATGCGGGGTTTAAGAGCTATGCTGGAAACAGCATAGCAAGTTTAAATAAGGCTAGTCCGTTATCAACTTGAAAAAGTGGCACCGAGTCGGTGCTTTTTT
4|sgACE_1|ACE	GGAAAACATCTACGACATGG	0	3059	1711	1468	2	1753	757	1258	7759	3837	1428	1140	0	1	2430	2305	5134	1636	ACE	ACE	4|sg_hACE_01|ACE	ACE	ACCGGGAAAACATCTACGACATGGGTTTAAGAGCTATGCTGGAAACAGCATAGCAAGTTTAAATAAGGCTAGTCCGTTATCAACTTGAAAAAGTGGCACCGAGTCGGTGCTTTTTT
4|sgACE_2|ACE	GGTGTGGAACGAGTATGCCG	0	251	770	734	2	0	482	656	0	0	735	558	3173	2716	995	459	2608	1636	ACE	ACE	4|sg_hACE_02|ACE	ACE	ACCGGGTGTGGAACGAGTATGCCGGTTTAAGAGCTATGCTGGAAACAGCATAGCAAGTTTAAATAAGGCTAGTCCGTTATCAACTTGAAAAAGTGGCACCGAGTCGGTGCTTTTTT
4|sgACE_3|ACE	GTTGTAGAAGTCCCAAGCCG	0	1133	877	497	2	549	906	471	0	1	690	656	0	0	575	883	2396	1636	ACE	ACE	4|sg_hACE_03|ACE	ACE	ACCGGTTGTAGAAGTCCCAAGCCGGTTTAAGAGCTATGCTGGAAACAGCATAGCAAGTTTAAATAAGGCTAGTCCGTTATCAACTTGAAAAAGTGGCACCGAGTCGGTGCTTTTTT
4|sgACE_4|ACE	GTTTCGTTTCGGGTAACAGG	0	1018	1123	628	379	813	188	377	0	0	488	233	1	1426	831	1484	1781	1636	ACE	ACE	4|sg_hACE_04|ACE	ACE	ACCGGTTTCGTTTCGGGTAACAGGGTTTAAGAGCTATGCTGGAAACAGCATAGCAAGTTTAAATAAGGCTAGTCCGTTATCAACTTGAAAAAGTGGCACCGAGTCGGTGCTTTTTT
4|sgACE2_1|ACE2	AACATCTTCATGCCTATGTG	0	2207	1470	1545	0	2834	670	932	0	0	1110	1223	3168	6	2206	2657	3858	59272	ACE2	ACE2	4|sg_hACE2_01|ACE2	ACE2	ACCGAACATCTTCATGCCTATGTGGTTTAAGAGCTATGCTGGAAACAGCATAGCAAGTTTAAATAAGGCTAGTCCGTTATCAACTTGAAAAAGTGGCACCGAGTCGGTGCTTTTTT
4|sgACE2_2|ACE2	CAGGATCCTTATGTGCACAA	0	962	871	736	0	657	477	526	0	0	1054	545	1	1476	1518	1422	1933	59272	ACE2	ACE2	4|sg_hACE2_02|ACE2	ACE2	ACCGCAGGATCCTTATGTGCACAAGTTTAAGAGCTATGCTGGAAACAGCATAGCAAGTTTAAATAAGGCTAGTCCGTTATCAACTTGAAAAAGTGGCACCGAGTCGGTGCTTTTTT
4|sgACE2_3|ACE2	CCAAAGGCGAGAGATAGTTG	0	1436	784	947	2	272	629	579	0	1	1336	772	2	4151	1723	622	2881	59272	ACE2	ACE2	4|sg_hACE2_03|ACE2	ACE2	ACCGCCAAAGGCGAGAGATAGTTGGTTTAAGAGCTATGCTGGAAACAGCATAGCAAGTTTAAATAAGGCTAGTCCGTTATCAACTTGAAAAAGTGGCACCGAGTCGGTGCTTTTTT
4|sgACE2_4|ACE2	TGCACAGAGAATATTCAAGG	1	1333	757	983	765	845	756	497	0	0	1046	530	1161	1	1125	480	1894	59272	ACE2	ACE2	4|sg_hACE2_04|ACE2	ACE2	ACCGTGCACAGAGAATATTCAAGGGTTTAAGAGCTATGCTGGAAACAGCATAGCAAGTTTAAATAAGGCTAGTCCGTTATCAACTTGAAAAAGTGGCACCGAGTCGGTGCTTTTTT
4|sgACER1_1|ACER1	CCCAGACAACGTAAATGTAG	0	3399	881	626	3220	558	1006	553	0	5385	2052	739	1677	352	1053	2502	3211	125981	ACER1	ACER1	4|sg_hACER1_01|ACER1	ACER1	ACCGCCCAGACAACGTAAATGTAGGTTTAAGAGCTATGCTGGAAACAGCATAGCAAGTTTAAATAAGGCTAGTCCGTTATCAACTTGAAAAAGTGGCACCGAGTCGGTGCTTTTTT
4|sgACER1_2|ACER1	GAAGACCAGGCGGATGAACT	13228	2566	2341	1994	3303	1768	1869	1292	0	6664	1402	1573	1	893	1752	2758	5405	125981	ACER1	ACER1	4|sg_hACER1_02|ACER1	ACER1	ACCGGAAGACCAGGCGGATGAACTGTTTAAGAGCTATGCTGGAAACAGCATAGCAAGTTTAAATAAGGCTAGTCCGTTATCAACTTGAAAAAGTGGCACCGAGTCGGTGCTTTTTT
4|sgACER1_3|ACER1	GGTGGCCGAGTTCTACAACA	0	295	566	731	0	1122	906	676	0	0	464	635	1197	1	666	917	1932	125981	ACER1	ACER1	4|sg_hACER1_03|ACER1	ACER1	ACCGGGTGGCCGAGTTCTACAACAGTTTAAGAGCTATGCTGGAAACAGCATAGCAAGTTTAAATAAGGCTAGTCCGTTATCAACTTGAAAAAGTGGCACCGAGTCGGTGCTTTTTT
4|sgACER1_4|ACER1	TGGACGAGATCGCCATCCTG	0	936	748	902	0	197	1091	355	0	0	424	744	1390	1	435	1381	2766	125981	ACER1	ACER1	4|sg_hACER1_04|ACER1	ACER1	ACCGTGGACGAGATCGCCATCCTGGTTTAAGAGCTATGCTGGAAACAGCATAGCAAGTTTAAATAAGGCTAGTCCGTTATCAACTTGAAAAAGTGGCACCGAGTCGGTGCTTTTTT
4|sgACER2_1|ACER2	ATACCTTCTGGGGAACCACA	2134	604	611	586	1	560	748	686	0	0	740	388	0	2487	1076	1427	2371	340485	ACER2	ACER2	4|sg_hACER2_01|ACER2	ACER2	ACCGATACCTTCTGGGGAACCACAGTTTAAGAGCTATGCTGGAAACAGCATAGCAAGTTTAAATAAGGCTAGTCCGTTATCAACTTGAAAAAGTGGCACCGAGTCGGTGCTTTTTT
4|sgACER2_2|ACER2	ATTCAGGGGTAGGTTCAAGG	0	2012	788	986	1	447	1034	721	0	1583	1113	548	0	1942	923	1562	2318	340485	ACER2	ACER2	4|sg_hACER2_02|ACER2	ACER2	ACCGATTCAGGGGTAGGTTCAAGGGTTTAAGAGCTATGCTGGAAACAGCATAGCAAGTTTAAATAAGGCTAGTCCGTTATCAACTTGAAAAAGTGGCACCGAGTCGGTGCTTTTTT
4|sgACER2_3|ACER2	CATCTGACCCAAGAAACTAA	0	0	806	834	2210	0	561	616	0	0	1183	487	1	0	966	1013	2189	340485	ACER2	ACER2	4|sg_hACER2_03|ACER2	ACER2	ACCGCATCTGACCCAAGAAACTAAGTTTAAGAGCTATGCTGGAAACAGCATAGCAAGTTTAAATAAGGCTAGTCCGTTATCAACTTGAAAAAGTGGCACCGAGTCGGTGCTTTTTT
4|sgACER2_4|ACER2	TATCGCCGAGTTCTACAACA	0	1987	1560	1495	3	1215	1227	1180	0	0	2052	997	1737	14	2283	2554	3877	340485	ACER2	ACER2	4|sg_hACER2_04|ACER2	ACER2	ACCGTATCGCCGAGTTCTACAACAGTTTAAGAGCTATGCTGGAAACAGCATAGCAAGTTTAAATAAGGCTAGTCCGTTATCAACTTGAAAAAGTGGCACCGAGTCGGTGCTTTTTT
4|sgACER3_1|ACER3	AAAAGAGCCGATATTCCATC	0	0	737	612	2	334	427	606	0	0	1683	885	1	5065	970	512	2411	55331	ACER3	ACER3	4|sg_hACER3_01|ACER3	ACER3	ACCGAAAAGAGCCGATATTCCATCGTTTAAGAGCTATGCTGGAAACAGCATAGCAAGTTTAAATAAGGCTAGTCCGTTATCAACTTGAAAAAGTGGCACCGAGTCGGTGCTTTTTT
4|sgACER3_2|ACER3	CTCGGCGATGTACCAGGTCA	0	1846	1473	1358	3867	1020	1135	876	0	0	973	931	5910	3	1003	1127	3160	55331	ACER3	ACER3	4|sg_hACER3_02|ACER3	ACER3	ACCGCTCGGCGATGTACCAGGTCAGTTTAAGAGCTATGCTGGAAACAGCATAGCAAGTTTAAATAAGGCTAGTCCGTTATCAACTTGAAAAAGTGGCACCGAGTCGGTGCTTTTTT
4|sgACER3_3|ACER3	TAAGCCATGGATAAACCCTG	2967	912	642	489	0	0	517	326	0	0	962	334	2	1809	657	479	2427	55331	ACER3	ACER3	4|sg_hACER3_03|ACER3	ACER3	ACCGTAAGCCATGGATAAACCCTGGTTTAAGAGCTATGCTGGAAACAGCATAGCAAGTTTAAATAAGGCTAGTCCGTTATCAACTTGAAAAAGTGGCACCGAGTCGGTGCTTTTTT
4|sgACER3_4|ACER3	TATTAAACTGAATAGAACTA	0	920	655	499	1	426	335	397	0	0	325	242	0	721	473	1232	1825	55331	ACER3	ACER3	4|sg_hACER3_04|ACER3	ACER3	ACCGTATTAAACTGAATAGAACTAGTTTAAGAGCTATGCTGGAAACAGCATAGCAAGTTTAAATAAGGCTAGTCCGTTATCAACTTGAAAAAGTGGCACCGAGTCGGTGCTTTTTT
4|sgACHE_1|ACHE	GGTGTCCATGAACTACCGGG	0	660	1094	899	0	429	538	734	0	418	1486	828	3535	1749	1108	1767	3310	43	ACHE	ACHE	4|sg_hACHE_01|ACHE	ACHE	ACCGGGTGTCCATGAACTACCGGGGTTTAAGAGCTATGCTGGAAACAGCATAGCAAGTTTAAATAAGGCTAGTCCGTTATCAACTTGAAAAAGTGGCACCGAGTCGGTGCTTTTTT
4|sgACHE_2|ACHE	TATGTGGACACCCTATACCC	0	947	501	488	0	495	86	474	0	0	533	204	0	0	253	712	2394	43	ACHE	ACHE	4|sg_hACHE_02|ACHE	ACHE	ACCGTATGTGGACACCCTATACCCGTTTAAGAGCTATGCTGGAAACAGCATAGCAAGTTTAAATAAGGCTAGTCCGTTATCAACTTGAAAAAGTGGCACCGAGTCGGTGCTTTTTT
4|sgACHE_3|ACHE	TGGTGGGAATGACACAGAGC	1727	0	975	828	455	300	120	349	0	1477	393	226	0	2975	728	422	2503	43	ACHE	ACHE	4|sg_hACHE_03|ACHE	ACHE	ACCGTGGTGGGAATGACACAGAGCGTTTAAGAGCTATGCTGGAAACAGCATAGCAAGTTTAAATAAGGCTAGTCCGTTATCAACTTGAAAAAGTGGCACCGAGTCGGTGCTTTTTT
4|sgACHE_4|ACHE	TGTCCTCGTCTGGATCTATG	1970	2991	894	1283	1	513	901	478	5703	0	1256	632	1899	1981	1310	1036	2742	43	ACHE	ACHE	4|sg_hACHE_04|ACHE	ACHE	ACCGTGTCCTCGTCTGGATCTATGGTTTAAGAGCTATGCTGGAAACAGCATAGCAAGTTTAAATAAGGCTAGTCCGTTATCAACTTGAAAAAGTGGCACCGAGTCGGTGCTTTTTT
4|sgACIN1_1|ACIN1	CCTGGTCAAGCGGCTCAAAG	0	841	1184	790	2	852	484	781	0	1	1078	318	6798	7	855	1243	2113	22985	ACIN1	ACIN1	4|sg_hACIN1_01|ACIN1	ACIN1	ACCGCCTGGTCAAGCGGCTCAAAGGTTTAAGAGCTATGCTGGAAACAGCATAGCAAGTTTAAATAAGGCTAGTCCGTTATCAACTTGAAAAAGTGGCACCGAGTCGGTGCTTTTTT
4|sgACIN1_2|ACIN1	CGTACTCATGCCAACCCTCG	7182	2243	2305	2121	1323	533	946	1364	0	0	2533	948	3985	0	2028	1928	6160	22985	ACIN1	ACIN1	4|sg_hACIN1_02|ACIN1	ACIN1	ACCGCGTACTCATGCCAACCCTCGGTTTAAGAGCTATGCTGGAAACAGCATAGCAAGTTTAAATAAGGCTAGTCCGTTATCAACTTGAAAAAGTGGCACCGAGTCGGTGCTTTTTT
4|sgACIN1_3|ACIN1	GAGGAATTAGCACTGGCCAA	2057	1860	1079	931	1	521	711	669	0	0	1042	644	4108	957	2091	1201	3750	22985	ACIN1	ACIN1	4|sg_hACIN1_03|ACIN1	ACIN1	ACCGGAGGAATTAGCACTGGCCAAGTTTAAGAGCTATGCTGGAAACAGCATAGCAAGTTTAAATAAGGCTAGTCCGTTATCAACTTGAAAAAGTGGCACCGAGTCGGTGCTTTTTT
4|sgACIN1_4|ACIN1	TGAGGGACAAAAATCTAGGG	0	1	829	725	1	553	311	577	12254	1476	1134	346	0	0	522	1091	2081	22985	ACIN1	ACIN1	4|sg_hACIN1_04|ACIN1	ACIN1	ACCGTGAGGGACAAAAATCTAGGGGTTTAAGAGCTATGCTGGAAACAGCATAGCAAGTTTAAATAAGGCTAGTCCGTTATCAACTTGAAAAAGTGGCACCGAGTCGGTGCTTTTTT
4|sgACKR1_1|ACKR1	AGCTAGGATACCCAGGACAC	0	1399	1086	825	0	1588	811	602	0	0	757	344	0	972	1113	273	2996	2532	ACKR1	ACKR1	4|sg_hACKR1_01|ACKR1	ACKR1	ACCGAGCTAGGATACCCAGGACACGTTTAAGAGCTATGCTGGAAACAGCATAGCAAGTTTAAATAAGGCTAGTCCGTTATCAACTTGAAAAAGTGGCACCGAGTCGGTGCTTTTTT
4|sgACKR1_2|ACKR1	CAATGGCAACAAGACAAAGA	0	1178	1161	1430	1	1147	1562	701	0	1782	1404	813	3211	1	1323	1227	3019	2532	ACKR1	ACKR1	4|sg_hACKR1_02|ACKR1	ACKR1	ACCGCAATGGCAACAAGACAAAGAGTTTAAGAGCTATGCTGGAAACAGCATAGCAAGTTTAAATAAGGCTAGTCCGTTATCAACTTGAAAAAGTGGCACCGAGTCGGTGCTTTTTT
4|sgACKR1_3|ACKR1	CTGCACCCTGATATACAGCA	0	307	1085	303	1	679	367	307	0	0	1196	458	0	903	957	594	1826	2532	ACKR1	ACKR1	4|sg_hACKR1_03|ACKR1	ACKR1	ACCGCTGCACCCTGATATACAGCAGTTTAAGAGCTATGCTGGAAACAGCATAGCAAGTTTAAATAAGGCTAGTCCGTTATCAACTTGAAAAAGTGGCACCGAGTCGGTGCTTTTTT
4|sgACKR1_4|ACKR1	GAAGGAATCATTCACACCAT	0	1308	1551	1444	2	619	336	778	0	0	1302	442	0	970	935	2162	3534	2532	ACKR1	ACKR1	4|sg_hACKR1_04|ACKR1	ACKR1	ACCGGAAGGAATCATTCACACCATGTTTAAGAGCTATGCTGGAAACAGCATAGCAAGTTTAAATAAGGCTAGTCCGTTATCAACTTGAAAAAGTGGCACCGAGTCGGTGCTTTTTT
4|sgACKR2_1|ACKR2	ATCTCAACCATCCGCCTGCG	1949	2211	1479	1220	1	0	771	875	10962	4165	1275	967	8920	539	2389	2822	3508	1238	ACKR2	ACKR2	4|sg_hACKR2_01|ACKR2	ACKR2	ACCGATCTCAACCATCCGCCTGCGGTTTAAGAGCTATGCTGGAAACAGCATAGCAAGTTTAAATAAGGCTAGTCCGTTATCAACTTGAAAAAGTGGCACCGAGTCGGTGCTTTTTT
4|sgACKR2_2|ACKR2	CAGCCCATACTATGGTAGCA	0	2092	1463	1431	2267	0	243	677	0	0	1174	896	2848	1047	1168	1378	3236	1238	ACKR2	ACKR2	4|sg_hACKR2_02|ACKR2	ACKR2	ACCGCAGCCCATACTATGGTAGCAGTTTAAGAGCTATGCTGGAAACAGCATAGCAAGTTTAAATAAGGCTAGTCCGTTATCAACTTGAAAAAGTGGCACCGAGTCGGTGCTTTTTT
4|sgACKR2_3|ACKR2	CATGCCCGCCGAAATCTGCG	0	4420	1790	1489	3182	0	1057	1139	2	2233	1823	1375	4427	3094	2458	2514	4821	1238	ACKR2	ACKR2	4|sg_hACKR2_03|ACKR2	ACKR2	ACCGCATGCCCGCCGAAATCTGCGGTTTAAGAGCTATGCTGGAAACAGCATAGCAAGTTTAAATAAGGCTAGTCCGTTATCAACTTGAAAAAGTGGCACCGAGTCGGTGCTTTTTT
4|sgACKR2_4|ACKR2	GGAGTGGAAGGAGAAACCCT	0	683	553	629	0	0	1149	473	0	0	522	496	1	988	1040	422	2930	1238	ACKR2	ACKR2	4|sg_hACKR2_04|ACKR2	ACKR2	ACCGGGAGTGGAAGGAGAAACCCTGTTTAAGAGCTATGCTGGAAACAGCATAGCAAGTTTAAATAAGGCTAGTCCGTTATCAACTTGAAAAAGTGGCACCGAGTCGGTGCTTTTTT
4|sgACKR3_1|ACKR3	AAGACAGCGATAATGGAGAA	0	1330	1327	1860	734	189	692	1025	0	2	2687	1190	4148	2048	2107	2746	4279	57007	ACKR3	ACKR3	4|sg_hACKR3_01|ACKR3	ACKR3	ACCGAAGACAGCGATAATGGAGAAGTTTAAGAGCTATGCTGGAAACAGCATAGCAAGTTTAAATAAGGCTAGTCCGTTATCAACTTGAAAAAGTGGCACCGAGTCGGTGCTTTTTT
4|sgACKR3_2|ACKR3	GCACTGCTACATCTTGAACC	0	803	1241	1445	1114	242	305	1242	0	0	1719	1211	0	4389	1216	3092	3746	57007	ACKR3	ACKR3	4|sg_hACKR3_02|ACKR3	ACKR3	ACCGGCACTGCTACATCTTGAACCGTTTAAGAGCTATGCTGGAAACAGCATAGCAAGTTTAAATAAGGCTAGTCCGTTATCAACTTGAAAAAGTGGCACCGAGTCGGTGCTTTTTT
4|sgACKR3_3|ACKR3	GGTCCACGCTCATGCACGTG	0	874	845	822	0	569	1082	844	0	0	1083	934	8745	1263	983	464	2438	57007	ACKR3	ACKR3	4|sg_hACKR3_03|ACKR3	ACKR3	ACCGGGTCCACGCTCATGCACGTGGTTTAAGAGCTATGCTGGAAACAGCATAGCAAGTTTAAATAAGGCTAGTCCGTTATCAACTTGAAAAAGTGGCACCGAGTCGGTGCTTTTTT
4|sgACKR3_4|ACKR3	TTTGCACGTGAGCTCGCCCA	1188	5	761	625	1	428	373	563	0	1966	849	604	3404	5	1091	644	2754	57007	ACKR3	ACKR3	4|sg_hACKR3_04|ACKR3	ACKR3	ACCGTTTGCACGTGAGCTCGCCCAGTTTAAGAGCTATGCTGGAAACAGCATAGCAAGTTTAAATAAGGCTAGTCCGTTATCAACTTGAAAAAGTGGCACCGAGTCGGTGCTTTTTT
4|sgACKR4_1|ACKR4	AGTCCCCAGCCAATCAGGAG	2145	2900	2050	1359	2674	913	726	1949	10093	7656	2388	1608	3880	1965	1700	2036	3598	51554	ACKR4	ACKR4	4|sg_hACKR4_01|ACKR4	ACKR4	ACCGAGTCCCCAGCCAATCAGGAGGTTTAAGAGCTATGCTGGAAACAGCATAGCAAGTTTAAATAAGGCTAGTCCGTTATCAACTTGAAAAAGTGGCACCGAGTCGGTGCTTTTTT
4|sgACKR4_2|ACKR4	ATTGATGTTCCTAGGTAGCG	0	356	935	902	1244	546	1314	584	0	0	1211	744	1	0	1563	2104	3301	51554	ACKR4	ACKR4	4|sg_hACKR4_02|ACKR4	ACKR4	ACCGATTGATGTTCCTAGGTAGCGGTTTAAGAGCTATGCTGGAAACAGCATAGCAAGTTTAAATAAGGCTAGTCCGTTATCAACTTGAAAAAGTGGCACCGAGTCGGTGCTTTTTT
4|sgACKR4_3|ACKR4	CAATGACGAAAACTATTGTG	0	665	1156	838	1	987	355	871	0	0	1435	780	3677	1908	1193	1642	2721	51554	ACKR4	ACKR4	4|sg_hACKR4_03|ACKR4	ACKR4	ACCGCAATGACGAAAACTATTGTGGTTTAAGAGCTATGCTGGAAACAGCATAGCAAGTTTAAATAAGGCTAGTCCGTTATCAACTTGAAAAAGTGGCACCGAGTCGGTGCTTTTTT
4|sgACKR4_4|ACKR4	TGTGCTACTTTATCACAGCA	0	914	804	911	1	497	568	561	0	1865	569	511	0	0	667	1975	2072	51554	ACKR4	ACKR4	4|sg_hACKR4_04|ACKR4	ACKR4	ACCGTGTGCTACTTTATCACAGCAGTTTAAGAGCTATGCTGGAAACAGCATAGCAAGTTTAAATAAGGCTAGTCCGTTATCAACTTGAAAAAGTGGCACCGAGTCGGTGCTTTTTT
4|sgACLY_1|ACLY	AGAGCAATTCGAGATTACCA	0	0	255	150	0	0	0	46	0	0	452	305	0	143	664	282	1648	47	ACLY	ACLY	4|sg_hACLY_01|ACLY	ACLY	ACCGAGAGCAATTCGAGATTACCAGTTTAAGAGCTATGCTGGAAACAGCATAGCAAGTTTAAATAAGGCTAGTCCGTTATCAACTTGAAAAAGTGGCACCGAGTCGGTGCTTTTTT
4|sgACLY_2|ACLY	CGGTCACCTGTACACGACAG	1	1010	381	157	116	0	195	107	0	0	423	256	1647	1	298	424	2842	47	ACLY	ACLY	4|sg_hACLY_02|ACLY	ACLY	ACCGCGGTCACCTGTACACGACAGGTTTAAGAGCTATGCTGGAAACAGCATAGCAAGTTTAAATAAGGCTAGTCCGTTATCAACTTGAAAAAGTGGCACCGAGTCGGTGCTTTTTT
4|sgACLY_3|ACLY	GACCAGCTGATCAAACGTCG	0	3012	1103	980	1222	927	512	695	0	0	787	478	1838	1967	780	1346	4014	47	ACLY	ACLY	4|sg_hACLY_03|ACLY	ACLY	ACCGGACCAGCTGATCAAACGTCGGTTTAAGAGCTATGCTGGAAACAGCATAGCAAGTTTAAATAAGGCTAGTCCGTTATCAACTTGAAAAAGTGGCACCGAGTCGGTGCTTTTTT
4|sgACLY_4|ACLY	GCCAGCGGGAGCACATCGGT	0	443	389	421	0	501	224	41	0	0	411	99	0	2829	403	110	3023	47	ACLY	ACLY	4|sg_hACLY_04|ACLY	ACLY	ACCGGCCAGCGGGAGCACATCGGTGTTTAAGAGCTATGCTGGAAACAGCATAGCAAGTTTAAATAAGGCTAGTCCGTTATCAACTTGAAAAAGTGGCACCGAGTCGGTGCTTTTTT
4|sgACMSD_1|ACMSD	AGTGGTGCGAGAGAATTGCT	10228	2	1107	652	0	241	674	744	0	0	897	312	2302	1423	899	1935	2508	130013	ACMSD	ACMSD	4|sg_hACMSD_01|ACMSD	ACMSD	ACCGAGTGGTGCGAGAGAATTGCTGTTTAAGAGCTATGCTGGAAACAGCATAGCAAGTTTAAATAAGGCTAGTCCGTTATCAACTTGAAAAAGTGGCACCGAGTCGGTGCTTTTTT
4|sgACMSD_2|ACMSD	CCTCCTGGGGTAGCTCACAA	0	0	1223	973	2608	1024	469	836	0	2518	907	700	1	1272	748	1330	2091	130013	ACMSD	ACMSD	4|sg_hACMSD_02|ACMSD	ACMSD	ACCGCCTCCTGGGGTAGCTCACAAGTTTAAGAGCTATGCTGGAAACAGCATAGCAAGTTTAAATAAGGCTAGTCCGTTATCAACTTGAAAAAGTGGCACCGAGTCGGTGCTTTTTT
4|sgACMSD_3|ACMSD	CGAGTGGGACCTGAACGCGC	0	951	900	1102	2	281	700	720	0	0	983	570	0	0	904	963	3025	130013	ACMSD	ACMSD	4|sg_hACMSD_03|ACMSD	ACMSD	ACCGCGAGTGGGACCTGAACGCGCGTTTAAGAGCTATGCTGGAAACAGCATAGCAAGTTTAAATAAGGCTAGTCCGTTATCAACTTGAAAAAGTGGCACCGAGTCGGTGCTTTTTT
4|sgACMSD_4|ACMSD	CTGCAGAGGTTTGGCTACGG	0	3133	1427	1127	3	477	813	655	19783	7555	1948	553	1706	482	1215	2094	3259	130013	ACMSD	ACMSD	4|sg_hACMSD_04|ACMSD	ACMSD	ACCGCTGCAGAGGTTTGGCTACGGGTTTAAGAGCTATGCTGGAAACAGCATAGCAAGTTTAAATAAGGCTAGTCCGTTATCAACTTGAAAAAGTGGCACCGAGTCGGTGCTTTTTT
4|sgACO1_1|ACO1	CCTGCCCCTAACATCACAGA	0	498	1029	779	1	0	382	818	0	0	1397	458	1	1617	788	2085	2669	48	ACO1	ACO1	4|sg_hACO1_01|ACO1	ACO1	ACCGCCTGCCCCTAACATCACAGAGTTTAAGAGCTATGCTGGAAACAGCATAGCAAGTTTAAATAAGGCTAGTCCGTTATCAACTTGAAAAAGTGGCACCGAGTCGGTGCTTTTTT
4|sgACO1_2|ACO1	CTTGGTGTCTAGGTTTGACG	0	497	428	433	0	0	934	353	0	0	622	339	0	1006	796	883	2469	48	ACO1	ACO1	4|sg_hACO1_02|ACO1	ACO1	ACCGCTTGGTGTCTAGGTTTGACGGTTTAAGAGCTATGCTGGAAACAGCATAGCAAGTTTAAATAAGGCTAGTCCGTTATCAACTTGAAAAAGTGGCACCGAGTCGGTGCTTTTTT
4|sgACO1_3|ACO1	TTATTACCCAGACAGCCTCG	1	1687	627	826	1	877	655	396	1	1	1787	672	2882	2	906	955	1976	48	ACO1	ACO1	4|sg_hACO1_03|ACO1	ACO1	ACCGTTATTACCCAGACAGCCTCGGTTTAAGAGCTATGCTGGAAACAGCATAGCAAGTTTAAATAAGGCTAGTCCGTTATCAACTTGAAAAAGTGGCACCGAGTCGGTGCTTTTTT
4|sgACO1_4|ACO1	TTGCATATGCTATTACTAAG	1	1887	1053	845	0	613	1630	1042	0	0	1600	540	1	945	1096	877	3271	48	ACO1	ACO1	4|sg_hACO1_04|ACO1	ACO1	ACCGTTGCATATGCTATTACTAAGGTTTAAGAGCTATGCTGGAAACAGCATAGCAAGTTTAAATAAGGCTAGTCCGTTATCAACTTGAAAAAGTGGCACCGAGTCGGTGCTTTTTT
4|sgACO2_1|ACO2	ATCTTCTCCGAGAGTGTCAG	0	1	407	339	1	0	1074	230	0	0	805	128	0	1981	557	24	2174	50	ACO2	ACO2	4|sg_hACO2_01|ACO2	ACO2	ACCGATCTTCTCCGAGAGTGTCAGGTTTAAGAGCTATGCTGGAAACAGCATAGCAAGTTTAAATAAGGCTAGTCCGTTATCAACTTGAAAAAGTGGCACCGAGTCGGTGCTTTTTT
4|sgACO2_2|ACO2	GTGCAGCTACCAATTAGACC	1	486	447	318	1814	249	0	110	0	0	212	348	0	0	148	151	1964	50	ACO2	ACO2	4|sg_hACO2_02|ACO2	ACO2	ACCGGTGCAGCTACCAATTAGACCGTTTAAGAGCTATGCTGGAAACAGCATAGCAAGTTTAAATAAGGCTAGTCCGTTATCAACTTGAAAAAGTGGCACCGAGTCGGTGCTTTTTT
4|sgACO2_3|ACO2	TCTCGGGGTTTGCGTCGTTG	4131	0	811	351	894	0	304	232	0	1161	1148	254	0	723	715	401	3578	50	ACO2	ACO2	4|sg_hACO2_03|ACO2	ACO2	ACCGTCTCGGGGTTTGCGTCGTTGGTTTAAGAGCTATGCTGGAAACAGCATAGCAAGTTTAAATAAGGCTAGTCCGTTATCAACTTGAAAAAGTGGCACCGAGTCGGTGCTTTTTT
4|sgACO2_4|ACO2	CACATAGCCGTCCCGCTCAA	0	0	465	279	1	0	132	524	0	4120	235	343	1038	1469	421	194	2774	50	ACO2	ACO2	4|sg_hACO2_04|ACO2	ACO2	ACCGCACATAGCCGTCCCGCTCAAGTTTAAGAGCTATGCTGGAAACAGCATAGCAAGTTTAAATAAGGCTAGTCCGTTATCAACTTGAAAAAGTGGCACCGAGTCGGTGCTTTTTT
4|sgACOT1_1|ACOT1	ACAATGCCAGGAAAGGGCCC	0	3539	2510	1713	2	265	1778	1430	12030	252	1551	1533	2277	3183	1847	1511	5031	641371	ACOT1	ACOT1	4|sg_hACOT1_01|ACOT1	ACOT1	ACCGACAATGCCAGGAAAGGGCCCGTTTAAGAGCTATGCTGGAAACAGCATAGCAAGTTTAAATAAGGCTAGTCCGTTATCAACTTGAAAAAGTGGCACCGAGTCGGTGCTTTTTT
4|sgACOT1_2|ACOT1	AGCCCGAGAAACCCTTGGTG	645	2095	1790	1361	2	0	2165	1044	0	1	1847	947	0	1606	1308	2309	4230	641371	ACOT1	ACOT1	4|sg_hACOT1_02|ACOT1	ACOT1	ACCGAGCCCGAGAAACCCTTGGTGGTTTAAGAGCTATGCTGGAAACAGCATAGCAAGTTTAAATAAGGCTAGTCCGTTATCAACTTGAAAAAGTGGCACCGAGTCGGTGCTTTTTT
4|sgACOT1_3|ACOT1	CTACTTGCTCAGTCATCCTG	0	298	1130	722	9	1105	214	771	0	1915	1057	734	1	0	1199	762	2377	641371	ACOT1	ACOT1	4|sg_hACOT1_03|ACOT1	ACOT1	ACCGCTACTTGCTCAGTCATCCTGGTTTAAGAGCTATGCTGGAAACAGCATAGCAAGTTTAAATAAGGCTAGTCCGTTATCAACTTGAAAAAGTGGCACCGAGTCGGTGCTTTTTT
4|sgACOT1_4|ACOT1	GGGGGAACCTTACGCTACAA	0	14	17	7	1	26	11	23	87	10	26	15	11	13	4	5	10	641371	ACOT1	ACOT1	4|sg_hACOT1_04|ACOT1	ACOT1	ACCGGGGGGAACCTTACGCTACAAGTTTAAGAGCTATGCTGGAAACAGCATAGCAAGTTTAAATAAGGCTAGTCCGTTATCAACTTGAAAAAGTGGCACCGAGTCGGTGCTTTTTT
4|sgACOT11_1|ACOT11	AGCTGAAGCAGATCACGCCG	0	1059	1700	1603	1588	733	1332	1249	41301	2	3138	834	2	1349	1210	1948	4823	26027	ACOT11	ACOT11	4|sg_hACOT11_01|ACOT11	ACOT11	ACCGAGCTGAAGCAGATCACGCCGGTTTAAGAGCTATGCTGGAAACAGCATAGCAAGTTTAAATAAGGCTAGTCCGTTATCAACTTGAAAAAGTGGCACCGAGTCGGTGCTTTTTT
4|sgACOT11_2|ACOT11	ATCTGCGTCCAGGACCACAA	2151	1302	712	894	3	0	638	657	0	3998	2199	776	3594	6	1400	768	2644	26027	ACOT11	ACOT11	4|sg_hACOT11_02|ACOT11	ACOT11	ACCGATCTGCGTCCAGGACCACAAGTTTAAGAGCTATGCTGGAAACAGCATAGCAAGTTTAAATAAGGCTAGTCCGTTATCAACTTGAAAAAGTGGCACCGAGTCGGTGCTTTTTT
4|sgACOT11_3|ACOT11	GCCAACTGCGCCATTCAGGG	7774	1001	1404	1010	0	0	580	345	0	2131	993	500	1	3426	1021	684	2698	26027	ACOT11	ACOT11	4|sg_hACOT11_03|ACOT11	ACOT11	ACCGGCCAACTGCGCCATTCAGGGGTTTAAGAGCTATGCTGGAAACAGCATAGCAAGTTTAAATAAGGCTAGTCCGTTATCAACTTGAAAAAGTGGCACCGAGTCGGTGCTTTTTT
4|sgACOT11_4|ACOT11	GGGATACCGGAACCCCACGG	0	512	608	531	1310	332	440	589	0	0	1016	427	0	0	762	605	2748	26027	ACOT11	ACOT11	4|sg_hACOT11_04|ACOT11	ACOT11	ACCGGGGATACCGGAACCCCACGGGTTTAAGAGCTATGCTGGAAACAGCATAGCAAGTTTAAATAAGGCTAGTCCGTTATCAACTTGAAAAAGTGGCACCGAGTCGGTGCTTTTTT
4|sgACOT12_1|ACOT12	AGCATTCAGCACAAGCATGG	0	1253	766	667	0	1097	1340	956	8013	0	384	523	7203	5	746	1184	2403	134526	ACOT12	ACOT12	4|sg_hACOT12_01|ACOT12	ACOT12	ACCGAGCATTCAGCACAAGCATGGGTTTAAGAGCTATGCTGGAAACAGCATAGCAAGTTTAAATAAGGCTAGTCCGTTATCAACTTGAAAAAGTGGCACCGAGTCGGTGCTTTTTT
4|sgACOT12_2|ACOT12	CCACCCCATGCAAACCATCA	1	0	1089	758	917	776	1251	828	0	1148	1186	707	1694	2722	1016	908	2364	134526	ACOT12	ACOT12	4|sg_hACOT12_02|ACOT12	ACOT12	ACCGCCACCCCATGCAAACCATCAGTTTAAGAGCTATGCTGGAAACAGCATAGCAAGTTTAAATAAGGCTAGTCCGTTATCAACTTGAAAAAGTGGCACCGAGTCGGTGCTTTTTT
4|sgACOT12_3|ACOT12	GATGATTTCAGACGCTATCG	1	1539	518	750	0	1109	363	442	0	0	470	455	2	1584	753	1518	2660	134526	ACOT12	ACOT12	4|sg_hACOT12_03|ACOT12	ACOT12	ACCGGATGATTTCAGACGCTATCGGTTTAAGAGCTATGCTGGAAACAGCATAGCAAGTTTAAATAAGGCTAGTCCGTTATCAACTTGAAAAAGTGGCACCGAGTCGGTGCTTTTTT
4|sgACOT12_4|ACOT12	GTAGATATGTTTAAGTTCCG	0	1176	669	754	0	833	173	692	0	0	699	445	1	721	494	1171	3156	134526	ACOT12	ACOT12	4|sg_hACOT12_04|ACOT12	ACOT12	ACCGGTAGATATGTTTAAGTTCCGGTTTAAGAGCTATGCTGGAAACAGCATAGCAAGTTTAAATAAGGCTAGTCCGTTATCAACTTGAAAAAGTGGCACCGAGTCGGTGCTTTTTT
4|sgACOT13_1|ACOT13	ACGTGGCTGTCAAACCGCCG	0	1383	1164	919	0	829	333	860	0	0	641	572	2	0	1327	2071	3402	55856	ACOT13	ACOT13	4|sg_hACOT13_01|ACOT13	ACOT13	ACCGACGTGGCTGTCAAACCGCCGGTTTAAGAGCTATGCTGGAAACAGCATAGCAAGTTTAAATAAGGCTAGTCCGTTATCAACTTGAAAAAGTGGCACCGAGTCGGTGCTTTTTT
4|sgACOT13_2|ACOT13	AGTAGATAACATATCAACAA	0	829	1029	456	0	421	160	339	1	5285	522	432	1	0	335	649	1867	55856	ACOT13	ACOT13	4|sg_hACOT13_02|ACOT13	ACOT13	ACCGAGTAGATAACATATCAACAAGTTTAAGAGCTATGCTGGAAACAGCATAGCAAGTTTAAATAAGGCTAGTCCGTTATCAACTTGAAAAAGTGGCACCGAGTCGGTGCTTTTTT
4|sgACOT13_3|ACOT13	GGTGATAAAGGCCATGACCA	1	291	1026	605	4	343	795	367	0	0	871	348	3838	5	604	635	2134	55856	ACOT13	ACOT13	4|sg_hACOT13_03|ACOT13	ACOT13	ACCGGGTGATAAAGGCCATGACCAGTTTAAGAGCTATGCTGGAAACAGCATAGCAAGTTTAAATAAGGCTAGTCCGTTATCAACTTGAAAAAGTGGCACCGAGTCGGTGCTTTTTT
4|sgACOT13_4|ACOT13	GTTCATATCGACACTGACTC	0	707	443	807	0	559	790	746	0	1	775	282	0	0	476	1211	2347	55856	ACOT13	ACOT13	4|sg_hACOT13_04|ACOT13	ACOT13	ACCGGTTCATATCGACACTGACTCGTTTAAGAGCTATGCTGGAAACAGCATAGCAAGTTTAAATAAGGCTAGTCCGTTATCAACTTGAAAAAGTGGCACCGAGTCGGTGCTTTTTT
4|sgACOT2_1|ACOT2	AGATCATTAGGGTTCCTGCT	0	560	1040	678	1	1	657	693	0	0	1378	322	1810	2	590	1696	2059	10965	ACOT2	ACOT2	4|sg_hACOT2_01|ACOT2	ACOT2	ACCGAGATCATTAGGGTTCCTGCTGTTTAAGAGCTATGCTGGAAACAGCATAGCAAGTTTAAATAAGGCTAGTCCGTTATCAACTTGAAAAAGTGGCACCGAGTCGGTGCTTTTTT
4|sgACOT2_2|ACOT2	CTACTTGCTCAGTCATCCCG	0	1200	1854	968	1659	497	370	763	0	3108	841	1053	2	0	1099	1816	2678	10965	ACOT2	ACOT2	4|sg_hACOT2_02|ACOT2	ACOT2	ACCGCTACTTGCTCAGTCATCCCGGTTTAAGAGCTATGCTGGAAACAGCATAGCAAGTTTAAATAAGGCTAGTCCGTTATCAACTTGAAAAAGTGGCACCGAGTCGGTGCTTTTTT
4|sgACOT2_3|ACOT2	GCTCGCCAAGAGTGTCGGCG	1	1552	1923	1412	1	331	2266	976	0	1540	2207	1002	886	1241	1984	2581	5190	10965	ACOT2	ACOT2	4|sg_hACOT2_03|ACOT2	ACOT2	ACCGGCTCGCCAAGAGTGTCGGCGGTTTAAGAGCTATGCTGGAAACAGCATAGCAAGTTTAAATAAGGCTAGTCCGTTATCAACTTGAAAAAGTGGCACCGAGTCGGTGCTTTTTT
4|sgACOT2_4|ACOT2	GGTACAGCCGGGACGCTCGA	2638	2271	1927	1364	0	0	1257	892	16645	5831	1970	910	2	4742	984	1454	3098	10965	ACOT2	ACOT2	4|sg_hACOT2_04|ACOT2	ACOT2	ACCGGGTACAGCCGGGACGCTCGAGTTTAAGAGCTATGCTGGAAACAGCATAGCAAGTTTAAATAAGGCTAGTCCGTTATCAACTTGAAAAAGTGGCACCGAGTCGGTGCTTTTTT
4|sgACOT4_1|ACOT4	ATAATAAGCTAGAGCCAACG	0	0	702	356	0	255	625	671	0	0	472	404	1	993	725	1269	2260	122970	ACOT4	ACOT4	4|sg_hACOT4_01|ACOT4	ACOT4	ACCGATAATAAGCTAGAGCCAACGGTTTAAGAGCTATGCTGGAAACAGCATAGCAAGTTTAAATAAGGCTAGTCCGTTATCAACTTGAAAAAGTGGCACCGAGTCGGTGCTTTTTT
4|sgACOT4_2|ACOT4	ATGTCAATGATCCCTGGGAA	1	2664	1064	935	0	935	707	880	0	4222	1024	1190	0	0	1530	764	2993	122970	ACOT4	ACOT4	4|sg_hACOT4_02|ACOT4	ACOT4	ACCGATGTCAATGATCCCTGGGAAGTTTAAGAGCTATGCTGGAAACAGCATAGCAAGTTTAAATAAGGCTAGTCCGTTATCAACTTGAAAAAGTGGCACCGAGTCGGTGCTTTTTT
4|sgACOT4_3|ACOT4	CAGTTTCCATCAATGGATCT	0	1141	674	560	0	1051	1104	478	0	0	571	266	0	0	516	507	1880	122970	ACOT4	ACOT4	4|sg_hACOT4_03|ACOT4	ACOT4	ACCGCAGTTTCCATCAATGGATCTGTTTAAGAGCTATGCTGGAAACAGCATAGCAAGTTTAAATAAGGCTAGTCCGTTATCAACTTGAAAAAGTGGCACCGAGTCGGTGCTTTTTT
4|sgACOT4_4|ACOT4	TCGCGGGACTCGAGCCCATG	2762	470	1197	1316	1	1201	1036	1275	1	1926	1385	787	1558	6808	1648	2816	4235	122970	ACOT4	ACOT4	4|sg_hACOT4_04|ACOT4	ACOT4	ACCGTCGCGGGACTCGAGCCCATGGTTTAAGAGCTATGCTGGAAACAGCATAGCAAGTTTAAATAAGGCTAGTCCGTTATCAACTTGAAAAAGTGGCACCGAGTCGGTGCTTTTTT
4|sgACOT6_1|ACOT6	ACAGGCATTGATAAGTACAG	1	1492	1394	1241	2018	873	622	1092	0	1993	1292	385	0	0	1501	2417	3395	641372	ACOT6	ACOT6	4|sg_hACOT6_01|ACOT6	ACOT6	ACCGACAGGCATTGATAAGTACAGGTTTAAGAGCTATGCTGGAAACAGCATAGCAAGTTTAAATAAGGCTAGTCCGTTATCAACTTGAAAAAGTGGCACCGAGTCGGTGCTTTTTT
4|sgACOT6_2|ACOT6	ATCATATCCTTGTAATGTAG	0	2346	1238	1122	1954	230	705	722	0	3728	1631	634	7010	8	1348	1012	3095	641372	ACOT6	ACOT6	4|sg_hACOT6_02|ACOT6	ACOT6	ACCGATCATATCCTTGTAATGTAGGTTTAAGAGCTATGCTGGAAACAGCATAGCAAGTTTAAATAAGGCTAGTCCGTTATCAACTTGAAAAAGTGGCACCGAGTCGGTGCTTTTTT
4|sgACOT6_3|ACOT6	CTGAAAGGCTACAAGCTCAT	2320	2382	1116	766	1147	249	428	799	0	0	958	396	2	946	763	1679	2283	641372	ACOT6	ACOT6	4|sg_hACOT6_03|ACOT6	ACOT6	ACCGCTGAAAGGCTACAAGCTCATGTTTAAGAGCTATGCTGGAAACAGCATAGCAAGTTTAAATAAGGCTAGTCCGTTATCAACTTGAAAAAGTGGCACCGAGTCGGTGCTTTTTT
4|sgACOT6_4|ACOT6	TTGGCATGGATGATCAAAGC	0	0	524	698	0	826	672	222	0	6107	935	234	1337	473	625	1009	2371	641372	ACOT6	ACOT6	4|sg_hACOT6_04|ACOT6	ACOT6	ACCGTTGGCATGGATGATCAAAGCGTTTAAGAGCTATGCTGGAAACAGCATAGCAAGTTTAAATAAGGCTAGTCCGTTATCAACTTGAAAAAGTGGCACCGAGTCGGTGCTTTTTT
4|sgACOT7_1|ACOT7	CAGGGGCACATACCACAGGG	3555	175	1517	1468	1074	1814	1348	1477	0	2829	1795	649	3163	3374	2838	1403	3565	11332	ACOT7	ACOT7	4|sg_hACOT7_01|ACOT7	ACOT7	ACCGCAGGGGCACATACCACAGGGGTTTAAGAGCTATGCTGGAAACAGCATAGCAAGTTTAAATAAGGCTAGTCCGTTATCAACTTGAAAAAGTGGCACCGAGTCGGTGCTTTTTT
4|sgACOT7_2|ACOT7	GCGGCCAGATGATGCCAACG	0	1921	1858	1839	1963	662	1578	1327	11224	5920	1819	1558	2610	129	2399	2592	4842	11332	ACOT7	ACOT7	4|sg_hACOT7_02|ACOT7	ACOT7	ACCGGCGGCCAGATGATGCCAACGGTTTAAGAGCTATGCTGGAAACAGCATAGCAAGTTTAAATAAGGCTAGTCCGTTATCAACTTGAAAAAGTGGCACCGAGTCGGTGCTTTTTT
4|sgACOT7_3|ACOT7	CGGTGCGCTCGACACGAGCC	0	1649	1559	1295	5	751	1585	1127	0	1987	2848	901	3721	1371	2258	1468	4035	11332	ACOT7	ACOT7	4|sg_hACOT7_03|ACOT7	ACOT7	ACCGCGGTGCGCTCGACACGAGCCGTTTAAGAGCTATGCTGGAAACAGCATAGCAAGTTTAAATAAGGCTAGTCCGTTATCAACTTGAAAAAGTGGCACCGAGTCGGTGCTTTTTT
4|sgACOT7_4|ACOT7	TTTCTCGCAGTATTCCCGGC	0	2143	911	721	1857	485	136	379	0	1584	940	401	2	3904	1159	1777	2323	11332	ACOT7	ACOT7	4|sg_hACOT7_04|ACOT7	ACOT7	ACCGTTTCTCGCAGTATTCCCGGCGTTTAAGAGCTATGCTGGAAACAGCATAGCAAGTTTAAATAAGGCTAGTCCGTTATCAACTTGAAAAAGTGGCACCGAGTCGGTGCTTTTTT
4|sgACOT8_1|ACOT8	ATTACTGGGTACCGGCCAAG	0	1	689	700	1	0	298	471	0	0	679	519	2	1220	691	846	2110	10005	ACOT8	ACOT8	4|sg_hACOT8_01|ACOT8	ACOT8	ACCGATTACTGGGTACCGGCCAAGGTTTAAGAGCTATGCTGGAAACAGCATAGCAAGTTTAAATAAGGCTAGTCCGTTATCAACTTGAAAAAGTGGCACCGAGTCGGTGCTTTTTT
4|sgACOT8_2|ACOT8	CCTTAAATACTGGTCAATGA	3330	237	441	402	3	32	863	704	0	1886	985	638	0	1184	921	1553	1744	10005	ACOT8	ACOT8	4|sg_hACOT8_02|ACOT8	ACOT8	ACCGCCTTAAATACTGGTCAATGAGTTTAAGAGCTATGCTGGAAACAGCATAGCAAGTTTAAATAAGGCTAGTCCGTTATCAACTTGAAAAAGTGGCACCGAGTCGGTGCTTTTTT
4|sgACOT8_3|ACOT8	TCGTGACCAAGACGCTACGG	1	1504	1010	752	0	651	980	451	0	0	839	373	1541	967	580	1062	2370	10005	ACOT8	ACOT8	4|sg_hACOT8_03|ACOT8	ACOT8	ACCGTCGTGACCAAGACGCTACGGGTTTAAGAGCTATGCTGGAAACAGCATAGCAAGTTTAAATAAGGCTAGTCCGTTATCAACTTGAAAAAGTGGCACCGAGTCGGTGCTTTTTT
4|sgACOT8_4|ACOT8	TTACTGGCTTGATCTCAATG	0	2738	2034	1622	6	1008	1130	1061	0	5136	2413	1405	5587	6	1699	2955	4931	10005	ACOT8	ACOT8	4|sg_hACOT8_04|ACOT8	ACOT8	ACCGTTACTGGCTTGATCTCAATGGTTTAAGAGCTATGCTGGAAACAGCATAGCAAGTTTAAATAAGGCTAGTCCGTTATCAACTTGAAAAAGTGGCACCGAGTCGGTGCTTTTTT
4|sgACOT9_1|ACOT9	AAGAGGAGCTCTTTAGACAA	0	880	875	689	1959	287	82	986	0	0	596	327	0	1398	1079	655	2548	23597	ACOT9	ACOT9	4|sg_hACOT9_01|ACOT9	ACOT9	ACCGAAGAGGAGCTCTTTAGACAAGTTTAAGAGCTATGCTGGAAACAGCATAGCAAGTTTAAATAAGGCTAGTCCGTTATCAACTTGAAAAAGTGGCACCGAGTCGGTGCTTTTTT
4|sgACOT9_2|ACOT9	CTTACCAATCTTATCCACCA	0	1	1127	712	0	523	793	554	0	1748	797	609	0	199	837	637	2007	23597	ACOT9	ACOT9	4|sg_hACOT9_02|ACOT9	ACOT9	ACCGCTTACCAATCTTATCCACCAGTTTAAGAGCTATGCTGGAAACAGCATAGCAAGTTTAAATAAGGCTAGTCCGTTATCAACTTGAAAAAGTGGCACCGAGTCGGTGCTTTTTT
4|sgACOT9_3|ACOT9	GAGAAACATCTCATGTATGG	0	0	936	829	2495	487	237	788	0	0	1000	955	1926	1968	1279	936	2839	23597	ACOT9	ACOT9	4|sg_hACOT9_03|ACOT9	ACOT9	ACCGGAGAAACATCTCATGTATGGGTTTAAGAGCTATGCTGGAAACAGCATAGCAAGTTTAAATAAGGCTAGTCCGTTATCAACTTGAAAAAGTGGCACCGAGTCGGTGCTTTTTT
4|sgACOT9_4|ACOT9	TCTTCCCGACCCAGCTAACA	0	2439	1199	1222	0	230	534	908	0	4770	1205	758	0	0	1118	2069	2892	23597	ACOT9	ACOT9	4|sg_hACOT9_04|ACOT9	ACOT9	ACCGTCTTCCCGACCCAGCTAACAGTTTAAGAGCTATGCTGGAAACAGCATAGCAAGTTTAAATAAGGCTAGTCCGTTATCAACTTGAAAAAGTGGCACCGAGTCGGTGCTTTTTT
4|sgACOX1_1|ACOX1	ACCTATCACCGGATTAACGA	1964	0	697	654	0	255	1095	743	14429	1	1073	406	2156	3339	911	890	3331	51	ACOX1	ACOX1	4|sg_hACOX1_01|ACOX1	ACOX1	ACCGACCTATCACCGGATTAACGAGTTTAAGAGCTATGCTGGAAACAGCATAGCAAGTTTAAATAAGGCTAGTCCGTTATCAACTTGAAAAAGTGGCACCGAGTCGGTGCTTTTTT
4|sgACOX1_2|ACOX1	CTGTGGTTTCCAAGCCTCGA	0	153	1710	936	1	472	1774	1137	0	0	1622	857	3324	2	1368	1108	3021	51	ACOX1	ACOX1	4|sg_hACOX1_02|ACOX1	ACOX1	ACCGCTGTGGTTTCCAAGCCTCGAGTTTAAGAGCTATGCTGGAAACAGCATAGCAAGTTTAAATAAGGCTAGTCCGTTATCAACTTGAAAAAGTGGCACCGAGTCGGTGCTTTTTT
4|sgACOX1_3|ACOX1	GCGCCGCCGAGAGATCGGTG	0	0	686	635	2126	827	0	319	0	0	1127	490	3304	1	1204	970	2324	51	ACOX1	ACOX1	4|sg_hACOX1_03|ACOX1	ACOX1	ACCGGCGCCGCCGAGAGATCGGTGGTTTAAGAGCTATGCTGGAAACAGCATAGCAAGTTTAAATAAGGCTAGTCCGTTATCAACTTGAAAAAGTGGCACCGAGTCGGTGCTTTTTT
4|sgACOX1_4|ACOX1	TGGCATTGAAGCATGTCGGA	433	1765	2080	1784	270	394	1304	949	0	6284	1458	917	3751	2646	1841	2328	4284	51	ACOX1	ACOX1	4|sg_hACOX1_04|ACOX1	ACOX1	ACCGTGGCATTGAAGCATGTCGGAGTTTAAGAGCTATGCTGGAAACAGCATAGCAAGTTTAAATAAGGCTAGTCCGTTATCAACTTGAAAAAGTGGCACCGAGTCGGTGCTTTTTT
4|sgACOX2_1|ACOX2	GACCATCTTCTAACCAACCC	0	2399	900	914	0	556	588	1390	0	774	1247	679	2	1276	782	1571	3888	8309	ACOX2	ACOX2	4|sg_hACOX2_01|ACOX2	ACOX2	ACCGGACCATCTTCTAACCAACCCGTTTAAGAGCTATGCTGGAAACAGCATAGCAAGTTTAAATAAGGCTAGTCCGTTATCAACTTGAAAAAGTGGCACCGAGTCGGTGCTTTTTT
4|sgACOX2_2|ACOX2	GCATAACTGATGGCCAGCTG	0	0	605	739	2	239	624	536	0	1959	1109	551	2721	4	586	809	2803	8309	ACOX2	ACOX2	4|sg_hACOX2_02|ACOX2	ACOX2	ACCGGCATAACTGATGGCCAGCTGGTTTAAGAGCTATGCTGGAAACAGCATAGCAAGTTTAAATAAGGCTAGTCCGTTATCAACTTGAAAAAGTGGCACCGAGTCGGTGCTTTTTT
4|sgACOX2_3|ACOX2	GTGTATCACAAACTCCTGGG	505	0	654	262	1	131	948	350	0	0	449	567	0	0	1051	551	1545	8309	ACOX2	ACOX2	4|sg_hACOX2_03|ACOX2	ACOX2	ACCGGTGTATCACAAACTCCTGGGGTTTAAGAGCTATGCTGGAAACAGCATAGCAAGTTTAAATAAGGCTAGTCCGTTATCAACTTGAAAAAGTGGCACCGAGTCGGTGCTTTTTT
4|sgACOX2_4|ACOX2	TGCTGTACCGAGTTTGACGT	0	694	451	325	0	0	200	220	0	0	635	436	0	3798	938	696	2333	8309	ACOX2	ACOX2	4|sg_hACOX2_04|ACOX2	ACOX2	ACCGTGCTGTACCGAGTTTGACGTGTTTAAGAGCTATGCTGGAAACAGCATAGCAAGTTTAAATAAGGCTAGTCCGTTATCAACTTGAAAAAGTGGCACCGAGTCGGTGCTTTTTT
4|sgACOX3_1|ACOX3	AAGCCACGGCAGTAATACCA	2178	486	2214	2138	5	529	2011	1669	10752	2033	3785	1776	772	2806	3604	5095	4941	8310	ACOX3	ACOX3	4|sg_hACOX3_01|ACOX3	ACOX3	ACCGAAGCCACGGCAGTAATACCAGTTTAAGAGCTATGCTGGAAACAGCATAGCAAGTTTAAATAAGGCTAGTCCGTTATCAACTTGAAAAAGTGGCACCGAGTCGGTGCTTTTTT
4|sgACOX3_2|ACOX3	CCGCACGCCTCACCTTAAAG	0	1371	1065	840	0	791	424	852	0	1780	519	674	3	0	676	2492	2243	8310	ACOX3	ACOX3	4|sg_hACOX3_02|ACOX3	ACOX3	ACCGCCGCACGCCTCACCTTAAAGGTTTAAGAGCTATGCTGGAAACAGCATAGCAAGTTTAAATAAGGCTAGTCCGTTATCAACTTGAAAAAGTGGCACCGAGTCGGTGCTTTTTT
4|sgACOX3_3|ACOX3	GATCCCAACTGCACATACGA	0	590	871	549	0	0	546	343	0	0	869	856	0	1175	994	720	2102	8310	ACOX3	ACOX3	4|sg_hACOX3_03|ACOX3	ACOX3	ACCGGATCCCAACTGCACATACGAGTTTAAGAGCTATGCTGGAAACAGCATAGCAAGTTTAAATAAGGCTAGTCCGTTATCAACTTGAAAAAGTGGCACCGAGTCGGTGCTTTTTT
4|sgACOX3_4|ACOX3	GCGTCAGTTTGGACCCACAG	0	881	650	821	0	286	731	390	1	3362	1421	590	1906	3	494	1233	2143	8310	ACOX3	ACOX3	4|sg_hACOX3_04|ACOX3	ACOX3	ACCGGCGTCAGTTTGGACCCACAGGTTTAAGAGCTATGCTGGAAACAGCATAGCAAGTTTAAATAAGGCTAGTCCGTTATCAACTTGAAAAAGTGGCACCGAGTCGGTGCTTTTTT
4|sgACOXL_1|ACOXL	AAGCCACAGCTAATCTCGAA	2	2823	2052	1922	6944	1050	991	1607	0	2100	2782	825	3254	521	1916	1804	5259	55289	ACOXL	ACOXL	4|sg_hACOXL_01|ACOXL	ACOXL	ACCGAAGCCACAGCTAATCTCGAAGTTTAAGAGCTATGCTGGAAACAGCATAGCAAGTTTAAATAAGGCTAGTCCGTTATCAACTTGAAAAAGTGGCACCGAGTCGGTGCTTTTTT
4|sgACOXL_2|ACOXL	ACAGGAACGATGAAACAGTG	2501	2427	1623	1256	1	85	630	913	0	0	1286	485	1	0	1571	1621	3893	55289	ACOXL	ACOXL	4|sg_hACOXL_02|ACOXL	ACOXL	ACCGACAGGAACGATGAAACAGTGGTTTAAGAGCTATGCTGGAAACAGCATAGCAAGTTTAAATAAGGCTAGTCCGTTATCAACTTGAAAAAGTGGCACCGAGTCGGTGCTTTTTT
4|sgACOXL_3|ACOXL	ATGTTTGCAATGACCGAGAG	0	2354	1578	1032	1741	208	285	579	0	0	884	801	0	1922	1151	2695	2824	55289	ACOXL	ACOXL	4|sg_hACOXL_03|ACOXL	ACOXL	ACCGATGTTTGCAATGACCGAGAGGTTTAAGAGCTATGCTGGAAACAGCATAGCAAGTTTAAATAAGGCTAGTCCGTTATCAACTTGAAAAAGTGGCACCGAGTCGGTGCTTTTTT
4|sgACOXL_4|ACOXL	TGACAAGGTTCGGATACCCA	0	0	801	592	1	874	1280	622	9714	0	877	480	1	1718	1498	1312	2659	55289	ACOXL	ACOXL	4|sg_hACOXL_04|ACOXL	ACOXL	ACCGTGACAAGGTTCGGATACCCAGTTTAAGAGCTATGCTGGAAACAGCATAGCAAGTTTAAATAAGGCTAGTCCGTTATCAACTTGAAAAAGTGGCACCGAGTCGGTGCTTTTTT
4|sgACP1_1|ACP1	ACATAGTATATAATCAAATG	0	0	665	443	0	0	45	385	0	0	213	310	0	1	573	85	1402	52	ACP1	ACP1	4|sg_hACP1_01|ACP1	ACP1	ACCGACATAGTATATAATCAAATGGTTTAAGAGCTATGCTGGAAACAGCATAGCAAGTTTAAATAAGGCTAGTCCGTTATCAACTTGAAAAAGTGGCACCGAGTCGGTGCTTTTTT
4|sgACP1_2|ACP1	ACCCAGACACACAAACAGCA	8513	1231	1584	1405	1	0	930	1069	0	0	1856	823	2042	3157	2217	2485	3686	52	ACP1	ACP1	4|sg_hACP1_02|ACP1	ACP1	ACCGACCCAGACACACAAACAGCAGTTTAAGAGCTATGCTGGAAACAGCATAGCAAGTTTAAATAAGGCTAGTCCGTTATCAACTTGAAAAAGTGGCACCGAGTCGGTGCTTTTTT
4|sgACP1_3|ACP1	GGAACCCCCCTGACTACCGA	1	0	812	951	0	270	1569	772	0	1	915	208	1897	1054	1226	511	2132	52	ACP1	ACP1	4|sg_hACP1_03|ACP1	ACP1	ACCGGGAACCCCCCTGACTACCGAGTTTAAGAGCTATGCTGGAAACAGCATAGCAAGTTTAAATAAGGCTAGTCCGTTATCAACTTGAAAAAGTGGCACCGAGTCGGTGCTTTTTT
4|sgACP1_4|ACP1	GGGGTTCCCTATCTCATACC	0	380	477	512	0	721	271	248	0	0	374	351	0	0	587	837	1571	52	ACP1	ACP1	4|sg_hACP1_04|ACP1	ACP1	ACCGGGGGTTCCCTATCTCATACCGTTTAAGAGCTATGCTGGAAACAGCATAGCAAGTTTAAATAAGGCTAGTCCGTTATCAACTTGAAAAAGTGGCACCGAGTCGGTGCTTTTTT
4|sgACP2_1|ACP2	ACATGGTGGCCAACGAGACA	0	0	914	608	0	0	806	369	0	0	863	782	2504	1890	1552	1303	2556	53	ACP2	ACP2	4|sg_hACP2_01|ACP2	ACP2	ACCGACATGGTGGCCAACGAGACAGTTTAAGAGCTATGCTGGAAACAGCATAGCAAGTTTAAATAAGGCTAGTCCGTTATCAACTTGAAAAAGTGGCACCGAGTCGGTGCTTTTTT
4|sgACP2_2|ACP2	ACCAGTGAAGACATATCCCA	6295	1922	1538	1139	5333	824	1073	702	0	0	1368	566	688	2777	1580	1851	3854	53	ACP2	ACP2	4|sg_hACP2_02|ACP2	ACP2	ACCGACCAGTGAAGACATATCCCAGTTTAAGAGCTATGCTGGAAACAGCATAGCAAGTTTAAATAAGGCTAGTCCGTTATCAACTTGAAAAAGTGGCACCGAGTCGGTGCTTTTTT
4|sgACP2_3|ACP2	CACCTCTTATCACCGGCAAG	1	1752	836	801	0	150	288	351	0	0	972	614	0	0	866	659	2171	53	ACP2	ACP2	4|sg_hACP2_03|ACP2	ACP2	ACCGCACCTCTTATCACCGGCAAGGTTTAAGAGCTATGCTGGAAACAGCATAGCAAGTTTAAATAAGGCTAGTCCGTTATCAACTTGAAAAAGTGGCACCGAGTCGGTGCTTTTTT
4|sgACP2_4|ACP2	TTCTGCAGCTGCTCATAACG	2	1845	1312	905	1262	304	659	1027	0	1879	1430	740	0	0	1215	1477	3184	53	ACP2	ACP2	4|sg_hACP2_04|ACP2	ACP2	ACCGTTCTGCAGCTGCTCATAACGGTTTAAGAGCTATGCTGGAAACAGCATAGCAAGTTTAAATAAGGCTAGTCCGTTATCAACTTGAAAAAGTGGCACCGAGTCGGTGCTTTTTT
4|sgACP5_1|ACP5	ACCCACGGCTACAAAGCGCA	2266	570	1323	854	3214	206	428	781	0	0	1737	582	2	2597	1138	1635	2953	54	ACP5	ACP5	4|sg_hACP5_01|ACP5	ACP5	ACCGACCCACGGCTACAAAGCGCAGTTTAAGAGCTATGCTGGAAACAGCATAGCAAGTTTAAATAAGGCTAGTCCGTTATCAACTTGAAAAAGTGGCACCGAGTCGGTGCTTTTTT
4|sgACP5_2|ACP5	CTGGACACAGTGACACTATG	0	1502	2132	1903	1146	921	1648	1504	0	2153	2148	1353	3	5221	2089	3480	4723	54	ACP5	ACP5	4|sg_hACP5_02|ACP5	ACP5	ACCGCTGGACACAGTGACACTATGGTTTAAGAGCTATGCTGGAAACAGCATAGCAAGTTTAAATAAGGCTAGTCCGTTATCAACTTGAAAAAGTGGCACCGAGTCGGTGCTTTTTT
4|sgACP5_3|ACP5	GCTCGGCTATGGACCACACG	0	480	774	514	1	1116	455	474	0	1926	917	521	0	1	745	1331	2313	54	ACP5	ACP5	4|sg_hACP5_03|ACP5	ACP5	ACCGGCTCGGCTATGGACCACACGGTTTAAGAGCTATGCTGGAAACAGCATAGCAAGTTTAAATAAGGCTAGTCCGTTATCAACTTGAAAAAGTGGCACCGAGTCGGTGCTTTTTT
4|sgACP5_4|ACP5	GTACCAGGGCACTTTGCGAA	1	4284	1359	1166	1	14	1414	1666	0	1557	2285	986	0	2963	1811	2211	4387	54	ACP5	ACP5	4|sg_hACP5_04|ACP5	ACP5	ACCGGTACCAGGGCACTTTGCGAAGTTTAAGAGCTATGCTGGAAACAGCATAGCAAGTTTAAATAAGGCTAGTCCGTTATCAACTTGAAAAAGTGGCACCGAGTCGGTGCTTTTTT
4|sgACP6_1|ACP6	AAAAAGGTGAAGGACAGGAT	1	3491	1032	1084	2	16	586	638	0	0	1763	790	3501	7238	1837	2934	3607	51205	ACP6	ACP6	4|sg_hACP6_01|ACP6	ACP6	ACCGAAAAAGGTGAAGGACAGGATGTTTAAGAGCTATGCTGGAAACAGCATAGCAAGTTTAAATAAGGCTAGTCCGTTATCAACTTGAAAAAGTGGCACCGAGTCGGTGCTTTTTT
4|sgACP6_2|ACP6	ACAGTCACCAATCTAGCTGG	3563	1271	972	946	754	905	364	683	19653	4829	639	287	2	2823	958	1635	2477	51205	ACP6	ACP6	4|sg_hACP6_02|ACP6	ACP6	ACCGACAGTCACCAATCTAGCTGGGTTTAAGAGCTATGCTGGAAACAGCATAGCAAGTTTAAATAAGGCTAGTCCGTTATCAACTTGAAAAAGTGGCACCGAGTCGGTGCTTTTTT
4|sgACP6_3|ACP6	ACCAACCTTCAACCCACAGG	1	3264	1214	788	0	488	552	485	10	0	611	208	2139	1	683	861	2407	51205	ACP6	ACP6	4|sg_hACP6_03|ACP6	ACP6	ACCGACCAACCTTCAACCCACAGGGTTTAAGAGCTATGCTGGAAACAGCATAGCAAGTTTAAATAAGGCTAGTCCGTTATCAACTTGAAAAAGTGGCACCGAGTCGGTGCTTTTTT
4|sgACP6_4|ACP6	GCAGGTCGTGTTTCGACACG	0	580	968	967	0	1147	725	514	0	0	1624	1239	982	2173	917	2433	3642	51205	ACP6	ACP6	4|sg_hACP6_04|ACP6	ACP6	ACCGGCAGGTCGTGTTTCGACACGGTTTAAGAGCTATGCTGGAAACAGCATAGCAAGTTTAAATAAGGCTAGTCCGTTATCAACTTGAAAAAGTGGCACCGAGTCGGTGCTTTTTT
4|sgACPP_1|ACPP	AAAGGCAGGTATAGCAACTG	4227	2050	1502	1437	0	932	438	1256	0	1977	1082	416	1837	1	1905	2183	3680	55	ACPP	ACPP	4|sg_hACP3_01|ACP3	ACP3	ACCGAAAGGCAGGTATAGCAACTGGTTTAAGAGCTATGCTGGAAACAGCATAGCAAGTTTAAATAAGGCTAGTCCGTTATCAACTTGAAAAAGTGGCACCGAGTCGGTGCTTTTTT
4|sgACPP_2|ACPP	ACTCCTTGGCTAGTACACTT	0	2203	2657	1900	2375	491	991	1972	8240	4315	1804	945	0	1019	3200	3086	5329	55	ACPP	ACPP	4|sg_hACP3_02|ACP3	ACP3	ACCGACTCCTTGGCTAGTACACTTGTTTAAGAGCTATGCTGGAAACAGCATAGCAAGTTTAAATAAGGCTAGTCCGTTATCAACTTGAAAAAGTGGCACCGAGTCGGTGCTTTTTT
4|sgACPP_3|ACPP	CTACGACCCTTTATATTGTG	191	1729	1353	1072	2	525	594	895	0	0	1242	785	1510	1798	1419	2213	3669	55	ACPP	ACPP	4|sg_hACP3_03|ACP3	ACP3	ACCGCTACGACCCTTTATATTGTGGTTTAAGAGCTATGCTGGAAACAGCATAGCAAGTTTAAATAAGGCTAGTCCGTTATCAACTTGAAAAAGTGGCACCGAGTCGGTGCTTTTTT
4|sgACPP_4|ACPP	GCCATGAGGATTCCTTTATG	1988	1739	949	848	1	274	129	896	0	0	737	249	1	1643	871	1173	2611	55	ACPP	ACPP	4|sg_hACP3_04|ACP3	ACP3	ACCGGCCATGAGGATTCCTTTATGGTTTAAGAGCTATGCTGGAAACAGCATAGCAAGTTTAAATAAGGCTAGTCCGTTATCAACTTGAAAAAGTGGCACCGAGTCGGTGCTTTTTT
4|sgACPT_1|ACPT	AGGCTGGTAGTGGAAGACCG	3325	628	667	826	0	298	790	542	0	3385	771	298	2083	1103	1008	1150	2225	93650	ACPT	ACPT	4|sg_hACP4_01|ACP4	ACP4	ACCGAGGCTGGTAGTGGAAGACCGGTTTAAGAGCTATGCTGGAAACAGCATAGCAAGTTTAAATAAGGCTAGTCCGTTATCAACTTGAAAAAGTGGCACCGAGTCGGTGCTTTTTT
4|sgACPT_2|ACPT	TATCCTTGCAAACTTCTCCC	3804	1848	750	632	0	289	182	306	0	3410	442	756	0	1315	903	1144	2466	93650	ACPT	ACPT	4|sg_hACP4_02|ACP4	ACP4	ACCGTATCCTTGCAAACTTCTCCCGTTTAAGAGCTATGCTGGAAACAGCATAGCAAGTTTAAATAAGGCTAGTCCGTTATCAACTTGAAAAAGTGGCACCGAGTCGGTGCTTTTTT
4|sgACPT_3|ACPT	TCGCCATGGCGGAATACCTG	0	1592	643	279	1324	0	413	625	0	0	668	544	4662	1126	926	1184	2439	93650	ACPT	ACPT	4|sg_hACP4_03|ACP4	ACP4	ACCGTCGCCATGGCGGAATACCTGGTTTAAGAGCTATGCTGGAAACAGCATAGCAAGTTTAAATAAGGCTAGTCCGTTATCAACTTGAAAAAGTGGCACCGAGTCGGTGCTTTTTT
4|sgACPT_4|ACPT	TTGGATATTGGAGCCCACGT	0	2851	1062	773	1	239	534	604	12348	2834	1217	403	1934	752	1042	1284	3118	93650	ACPT	ACPT	4|sg_hACP4_04|ACP4	ACP4	ACCGTTGGATATTGGAGCCCACGTGTTTAAGAGCTATGCTGGAAACAGCATAGCAAGTTTAAATAAGGCTAGTCCGTTATCAACTTGAAAAAGTGGCACCGAGTCGGTGCTTTTTT
4|sgACR_1|ACR	AAGCGCCCACACGAAATGGG	0	484	1374	1103	1	328	414	395	0	2105	2313	810	0	2002	1482	1104	3329	49	ACR	ACR	4|sg_hACR_01|ACR	ACR	ACCGAAGCGCCCACACGAAATGGGGTTTAAGAGCTATGCTGGAAACAGCATAGCAAGTTTAAATAAGGCTAGTCCGTTATCAACTTGAAAAAGTGGCACCGAGTCGGTGCTTTTTT
4|sgACR_2|ACR	CCCCGACACTTACTCACACG	0	776	744	755	1385	338	763	363	0	0	1479	483	1	2375	835	583	3127	49	ACR	ACR	4|sg_hACR_02|ACR	ACR	ACCGCCCCGACACTTACTCACACGGTTTAAGAGCTATGCTGGAAACAGCATAGCAAGTTTAAATAAGGCTAGTCCGTTATCAACTTGAAAAAGTGGCACCGAGTCGGTGCTTTTTT
4|sgACR_3|ACR	GAAAGCGCCTATGTGGTCGT	1288	1	537	332	0	493	813	318	0	0	1084	576	3232	5	1002	1056	2954	49	ACR	ACR	4|sg_hACR_03|ACR	ACR	ACCGGAAAGCGCCTATGTGGTCGTGTTTAAGAGCTATGCTGGAAACAGCATAGCAAGTTTAAATAAGGCTAGTCCGTTATCAACTTGAAAAAGTGGCACCGAGTCGGTGCTTTTTT
4|sgACR_4|ACR	TAATGTGCATGACTGGAGAC	0	2535	1198	1089	0	362	535	751	0	0	1561	469	0	0	755	766	3060	49	ACR	ACR	4|sg_hACR_04|ACR	ACR	ACCGTAATGTGCATGACTGGAGACGTTTAAGAGCTATGCTGGAAACAGCATAGCAAGTTTAAATAAGGCTAGTCCGTTATCAACTTGAAAAAGTGGCACCGAGTCGGTGCTTTTTT
4|sgACRBP_1|ACRBP	AAGAAGCGTTCGTATTCGGT	0	0	348	251	1	0	332	409	0	0	728	405	0	0	721	524	1702	84519	ACRBP	ACRBP	4|sg_hACRBP_01|ACRBP	ACRBP	ACCGAAGAAGCGTTCGTATTCGGTGTTTAAGAGCTATGCTGGAAACAGCATAGCAAGTTTAAATAAGGCTAGTCCGTTATCAACTTGAAAAAGTGGCACCGAGTCGGTGCTTTTTT
4|sgACRBP_2|ACRBP	CAAACCAGGAGGCATAAGGG	4140	3518	1785	1400	1	1390	787	1342	0	1862	3700	1011	2788	3	2486	2815	3817	84519	ACRBP	ACRBP	4|sg_hACRBP_02|ACRBP	ACRBP	ACCGCAAACCAGGAGGCATAAGGGGTTTAAGAGCTATGCTGGAAACAGCATAGCAAGTTTAAATAAGGCTAGTCCGTTATCAACTTGAAAAAGTGGCACCGAGTCGGTGCTTTTTT
4|sgACRBP_3|ACRBP	GACTCTACTTCTCGTACCCG	2012	0	1152	752	0	355	910	944	0	4172	2046	617	4959	3571	1328	982	3709	84519	ACRBP	ACRBP	4|sg_hACRBP_03|ACRBP	ACRBP	ACCGGACTCTACTTCTCGTACCCGGTTTAAGAGCTATGCTGGAAACAGCATAGCAAGTTTAAATAAGGCTAGTCCGTTATCAACTTGAAAAAGTGGCACCGAGTCGGTGCTTTTTT
4|sgACRBP_4|ACRBP	GGTGCTGTGCTATTCGATCG	0	1740	885	819	2	282	911	987	0	0	828	521	1	0	731	975	2985	84519	ACRBP	ACRBP	4|sg_hACRBP_04|ACRBP	ACRBP	ACCGGGTGCTGTGCTATTCGATCGGTTTAAGAGCTATGCTGGAAACAGCATAGCAAGTTTAAATAAGGCTAGTCCGTTATCAACTTGAAAAAGTGGCACCGAGTCGGTGCTTTTTT
4|sgACRC_1|ACRC	AAACTATTGTGGAGCCACCG	0	146	1629	1093	1789	248	287	783	0	0	1509	583	0	3927	1701	1194	3183	93953	ACRC	ACRC	4|sg_hGCNA_01|GCNA	GCNA	ACCGAAACTATTGTGGAGCCACCGGTTTAAGAGCTATGCTGGAAACAGCATAGCAAGTTTAAATAAGGCTAGTCCGTTATCAACTTGAAAAAGTGGCACCGAGTCGGTGCTTTTTT
4|sgACRC_2|ACRC	CAAACCACCAAGTGATCCTG	0	2034	1724	1210	1	955	383	1314	11863	2	1505	1185	2164	3	1507	1408	3639	93953	ACRC	ACRC	4|sg_hGCNA_02|GCNA	GCNA	ACCGCAAACCACCAAGTGATCCTGGTTTAAGAGCTATGCTGGAAACAGCATAGCAAGTTTAAATAAGGCTAGTCCGTTATCAACTTGAAAAAGTGGCACCGAGTCGGTGCTTTTTT
4|sgACRC_3|ACRC	GCATCCTTAATGTCCAGTCA	2630	1030	721	490	1	0	942	593	13702	0	2025	568	3466	6258	1789	1361	2171	93953	ACRC	ACRC	4|sg_hGCNA_03|GCNA	GCNA	ACCGGCATCCTTAATGTCCAGTCAGTTTAAGAGCTATGCTGGAAACAGCATAGCAAGTTTAAATAAGGCTAGTCCGTTATCAACTTGAAAAAGTGGCACCGAGTCGGTGCTTTTTT
4|sgACRC_4|ACRC	TTATTGGAAATAAACAGCGA	3290	2204	546	576	0	407	472	494	0	0	737	266	1	1038	736	709	2777	93953	ACRC	ACRC	4|sg_hGCNA_04|GCNA	GCNA	ACCGTTATTGGAAATAAACAGCGAGTTTAAGAGCTATGCTGGAAACAGCATAGCAAGTTTAAATAAGGCTAGTCCGTTATCAACTTGAAAAAGTGGCACCGAGTCGGTGCTTTTTT
4|sgACRV1_1|ACRV1	CCTGACTCAAGCTCACTCAA	1	1142	1319	1229	1256	1641	454	1167	0	0	1867	1081	1840	1401	1719	1545	3431	56	ACRV1	ACRV1	4|sg_hACRV1_01|ACRV1	ACRV1	ACCGCCTGACTCAAGCTCACTCAAGTTTAAGAGCTATGCTGGAAACAGCATAGCAAGTTTAAATAAGGCTAGTCCGTTATCAACTTGAAAAAGTGGCACCGAGTCGGTGCTTTTTT
4|sgACRV1_2|ACRV1	GCTGAAGGTGAGCATACTGT	0	1088	737	759	0	189	331	622	0	1	2205	1022	0	2192	1003	1172	2126	56	ACRV1	ACRV1	4|sg_hACRV1_02|ACRV1	ACRV1	ACCGGCTGAAGGTGAGCATACTGTGTTTAAGAGCTATGCTGGAAACAGCATAGCAAGTTTAAATAAGGCTAGTCCGTTATCAACTTGAAAAAGTGGCACCGAGTCGGTGCTTTTTT
4|sgACRV1_3|ACRV1	TGGTTCAAGCAAGCACACTG	0	0	808	773	0	799	347	670	0	0	686	502	6052	1352	524	1313	1978	56	ACRV1	ACRV1	4|sg_hACRV1_03|ACRV1	ACRV1	ACCGTGGTTCAAGCAAGCACACTGGTTTAAGAGCTATGCTGGAAACAGCATAGCAAGTTTAAATAAGGCTAGTCCGTTATCAACTTGAAAAAGTGGCACCGAGTCGGTGCTTTTTT
4|sgACRV1_4|ACRV1	TTCAGGTGAGCACGCTTCAG	3363	699	915	1325	1	596	410	771	0	2474	788	531	0	1317	547	1158	2267	56	ACRV1	ACRV1	4|sg_hACRV1_04|ACRV1	ACRV1	ACCGTTCAGGTGAGCACGCTTCAGGTTTAAGAGCTATGCTGGAAACAGCATAGCAAGTTTAAATAAGGCTAGTCCGTTATCAACTTGAAAAAGTGGCACCGAGTCGGTGCTTTTTT
4|sgACSBG1_1|ACSBG1	GAAGGTGAATAATGCCCAGT	0	0	582	526	0	0	328	405	0	1178	931	320	2084	998	531	404	2208	23205	ACSBG1	ACSBG1	4|sg_hACSBG1_01|ACSBG1	ACSBG1	ACCGGAAGGTGAATAATGCCCAGTGTTTAAGAGCTATGCTGGAAACAGCATAGCAAGTTTAAATAAGGCTAGTCCGTTATCAACTTGAAAAAGTGGCACCGAGTCGGTGCTTTTTT
4|sgACSBG1_2|ACSBG1	GGAGCCCACATCACACATGG	0	1	913	1113	2	2037	813	890	14517	0	544	399	0	3041	850	802	2752	23205	ACSBG1	ACSBG1	4|sg_hACSBG1_02|ACSBG1	ACSBG1	ACCGGGAGCCCACATCACACATGGGTTTAAGAGCTATGCTGGAAACAGCATAGCAAGTTTAAATAAGGCTAGTCCGTTATCAACTTGAAAAAGTGGCACCGAGTCGGTGCTTTTTT
4|sgACSBG1_3|ACSBG1	TCAAAAGAACTTCTATGGAG	1	1076	859	819	1	1126	846	484	0	3590	681	618	0	0	1415	764	2031	23205	ACSBG1	ACSBG1	4|sg_hACSBG1_03|ACSBG1	ACSBG1	ACCGTCAAAAGAACTTCTATGGAGGTTTAAGAGCTATGCTGGAAACAGCATAGCAAGTTTAAATAAGGCTAGTCCGTTATCAACTTGAAAAAGTGGCACCGAGTCGGTGCTTTTTT
4|sgACSBG1_4|ACSBG1	TGTGCATCGGATGTTCTACG	0	1357	1018	702	1	1374	805	547	0	2089	1176	753	0	0	1018	655	2748	23205	ACSBG1	ACSBG1	4|sg_hACSBG1_04|ACSBG1	ACSBG1	ACCGTGTGCATCGGATGTTCTACGGTTTAAGAGCTATGCTGGAAACAGCATAGCAAGTTTAAATAAGGCTAGTCCGTTATCAACTTGAAAAAGTGGCACCGAGTCGGTGCTTTTTT
4|sgACSBG2_1|ACSBG2	AAATTCAGGGATGGTCATCG	0	1834	1231	1032	1	589	648	777	0	0	800	414	3373	2	1035	640	2690	81616	ACSBG2	ACSBG2	4|sg_hACSBG2_01|ACSBG2	ACSBG2	ACCGAAATTCAGGGATGGTCATCGGTTTAAGAGCTATGCTGGAAACAGCATAGCAAGTTTAAATAAGGCTAGTCCGTTATCAACTTGAAAAAGTGGCACCGAGTCGGTGCTTTTTT
4|sgACSBG2_2|ACSBG2	ACACGAGAGTCTTAGCCATG	0	3350	1912	1563	2	918	1067	948	0	1793	2435	879	1	1184	2504	3032	5236	81616	ACSBG2	ACSBG2	4|sg_hACSBG2_02|ACSBG2	ACSBG2	ACCGACACGAGAGTCTTAGCCATGGTTTAAGAGCTATGCTGGAAACAGCATAGCAAGTTTAAATAAGGCTAGTCCGTTATCAACTTGAAAAAGTGGCACCGAGTCGGTGCTTTTTT
4|sgACSBG2_3|ACSBG2	GGGACCACAGGCATACCCAA	1	2088	1574	1413	3	357	1273	1262	9453	1	1760	1046	5762	2374	1468	1262	4964	81616	ACSBG2	ACSBG2	4|sg_hACSBG2_03|ACSBG2	ACSBG2	ACCGGGGACCACAGGCATACCCAAGTTTAAGAGCTATGCTGGAAACAGCATAGCAAGTTTAAATAAGGCTAGTCCGTTATCAACTTGAAAAAGTGGCACCGAGTCGGTGCTTTTTT
4|sgACSBG2_4|ACSBG2	TCCATGAAATCATCCCACTG	0	0	701	468	0	1282	370	217	0	0	766	392	1641	2	752	1525	1781	81616	ACSBG2	ACSBG2	4|sg_hACSBG2_04|ACSBG2	ACSBG2	ACCGTCCATGAAATCATCCCACTGGTTTAAGAGCTATGCTGGAAACAGCATAGCAAGTTTAAATAAGGCTAGTCCGTTATCAACTTGAAAAAGTGGCACCGAGTCGGTGCTTTTTT
4|sgACSF2_1|ACSF2	ACGTAGCTGAGGCCTCCGAT	0	0	1032	728	3753	0	298	361	0	4	1610	615	1	1351	1404	1612	3638	80221	ACSF2	ACSF2	4|sg_hACSF2_01|ACSF2	ACSF2	ACCGACGTAGCTGAGGCCTCCGATGTTTAAGAGCTATGCTGGAAACAGCATAGCAAGTTTAAATAAGGCTAGTCCGTTATCAACTTGAAAAAGTGGCACCGAGTCGGTGCTTTTTT
4|sgACSF2_2|ACSF2	ATGGCTCGGATCAACTCTGG	1772	1746	975	919	0	189	794	981	0	0	590	530	0	0	673	1077	3713	80221	ACSF2	ACSF2	4|sg_hACSF2_02|ACSF2	ACSF2	ACCGATGGCTCGGATCAACTCTGGGTTTAAGAGCTATGCTGGAAACAGCATAGCAAGTTTAAATAAGGCTAGTCCGTTATCAACTTGAAAAAGTGGCACCGAGTCGGTGCTTTTTT
4|sgACSF2_3|ACSF2	CGTGGGGGTACCATACAGGA	0	1295	920	1136	3260	436	458	527	0	0	1520	683	1	2	1045	1920	2913	80221	ACSF2	ACSF2	4|sg_hACSF2_03|ACSF2	ACSF2	ACCGCGTGGGGGTACCATACAGGAGTTTAAGAGCTATGCTGGAAACAGCATAGCAAGTTTAAATAAGGCTAGTCCGTTATCAACTTGAAAAAGTGGCACCGAGTCGGTGCTTTTTT
4|sgACSF2_4|ACSF2	GTCTTCATGGAGGACGACCA	0	3249	929	905	1	587	732	607	0	0	1066	603	2	2937	673	1655	3013	80221	ACSF2	ACSF2	4|sg_hACSF2_04|ACSF2	ACSF2	ACCGGTCTTCATGGAGGACGACCAGTTTAAGAGCTATGCTGGAAACAGCATAGCAAGTTTAAATAAGGCTAGTCCGTTATCAACTTGAAAAAGTGGCACCGAGTCGGTGCTTTTTT
4|sgACSF3_1|ACSF3	CCATGATCATCTACACCAGT	1	846	2362	1328	6	2463	566	1624	0	3802	1993	1177	0	0	1497	1740	4633	197322	ACSF3	ACSF3	4|sg_hACSF3_01|ACSF3	ACSF3	ACCGCCATGATCATCTACACCAGTGTTTAAGAGCTATGCTGGAAACAGCATAGCAAGTTTAAATAAGGCTAGTCCGTTATCAACTTGAAAAAGTGGCACCGAGTCGGTGCTTTTTT
4|sgACSF3_2|ACSF3	GCAGCGCGTTGACCACACCA	2	2100	3020	1927	0	554	1657	1602	0	3783	3587	1189	4	2174	2238	3496	5887	197322	ACSF3	ACSF3	4|sg_hACSF3_02|ACSF3	ACSF3	ACCGGCAGCGCGTTGACCACACCAGTTTAAGAGCTATGCTGGAAACAGCATAGCAAGTTTAAATAAGGCTAGTCCGTTATCAACTTGAAAAAGTGGCACCGAGTCGGTGCTTTTTT
4|sgACSF3_3|ACSF3	TAACGATGCCTCCTACGTCG	1	1139	806	633	1	210	660	415	0	1	1033	390	3539	1609	1431	1426	2395	197322	ACSF3	ACSF3	4|sg_hACSF3_03|ACSF3	ACSF3	ACCGTAACGATGCCTCCTACGTCGGTTTAAGAGCTATGCTGGAAACAGCATAGCAAGTTTAAATAAGGCTAGTCCGTTATCAACTTGAAAAAGTGGCACCGAGTCGGTGCTTTTTT
4|sgACSF3_4|ACSF3	TCTTAAGTTCTGAAACGCCG	0	151	1002	777	1	260	453	616	0	870	1143	367	0	0	685	970	1753	197322	ACSF3	ACSF3	4|sg_hACSF3_04|ACSF3	ACSF3	ACCGTCTTAAGTTCTGAAACGCCGGTTTAAGAGCTATGCTGGAAACAGCATAGCAAGTTTAAATAAGGCTAGTCCGTTATCAACTTGAAAAAGTGGCACCGAGTCGGTGCTTTTTT
4|sgACSL1_1|ACSL1	ATCACGTACATAGTCAACAA	0	2457	1021	479	1118	192	420	1303	0	2692	1345	589	0	1169	1138	870	2434	2180	ACSL1	ACSL1	4|sg_hACSL1_01|ACSL1	ACSL1	ACCGATCACGTACATAGTCAACAAGTTTAAGAGCTATGCTGGAAACAGCATAGCAAGTTTAAATAAGGCTAGTCCGTTATCAACTTGAAAAAGTGGCACCGAGTCGGTGCTTTTTT
4|sgACSL1_2|ACSL1	CAAGAGCCATCGCTTCAGCG	0	723	874	736	2	697	640	984	0	4224	1122	835	0	3140	1352	880	2451	2180	ACSL1	ACSL1	4|sg_hACSL1_02|ACSL1	ACSL1	ACCGCAAGAGCCATCGCTTCAGCGGTTTAAGAGCTATGCTGGAAACAGCATAGCAAGTTTAAATAAGGCTAGTCCGTTATCAACTTGAAAAAGTGGCACCGAGTCGGTGCTTTTTT
4|sgACSL1_3|ACSL1	GATGCCAATGAACTGATCTG	0	0	690	562	0	0	140	467	0	0	986	654	1	1697	819	1827	2283	2180	ACSL1	ACSL1	4|sg_hACSL1_03|ACSL1	ACSL1	ACCGGATGCCAATGAACTGATCTGGTTTAAGAGCTATGCTGGAAACAGCATAGCAAGTTTAAATAAGGCTAGTCCGTTATCAACTTGAAAAAGTGGCACCGAGTCGGTGCTTTTTT
4|sgACSL1_4|ACSL1	GTTTCCGAGAGCCTAAACAA	0	1	1187	1158	2	1146	329	949	0	0	1566	519	32	1761	878	1267	2942	2180	ACSL1	ACSL1	4|sg_hACSL1_04|ACSL1	ACSL1	ACCGGTTTCCGAGAGCCTAAACAAGTTTAAGAGCTATGCTGGAAACAGCATAGCAAGTTTAAATAAGGCTAGTCCGTTATCAACTTGAAAAAGTGGCACCGAGTCGGTGCTTTTTT
4|sgACSL3_1|ACSL3	ATGATTACTGCAATATCTGA	0	593	647	841	1638	139	656	683	0	0	1214	601	0	0	963	1264	4116	2181	ACSL3	ACSL3	4|sg_hACSL3_01|ACSL3	ACSL3	ACCGATGATTACTGCAATATCTGAGTTTAAGAGCTATGCTGGAAACAGCATAGCAAGTTTAAATAAGGCTAGTCCGTTATCAACTTGAAAAAGTGGCACCGAGTCGGTGCTTTTTT
4|sgACSL3_2|ACSL3	GAAAGTTCGAAGCTTGCTAG	0	908	940	941	0	964	210	565	0	0	1002	654	0	0	975	1628	3056	2181	ACSL3	ACSL3	4|sg_hACSL3_02|ACSL3	ACSL3	ACCGGAAAGTTCGAAGCTTGCTAGGTTTAAGAGCTATGCTGGAAACAGCATAGCAAGTTTAAATAAGGCTAGTCCGTTATCAACTTGAAAAAGTGGCACCGAGTCGGTGCTTTTTT
4|sgACSL3_3|ACSL3	GTGGTGAAGAGTAACCAATG	0	0	432	519	0	84	117	66	0	2550	522	232	0	0	549	55	1869	2181	ACSL3	ACSL3	4|sg_hACSL3_03|ACSL3	ACSL3	ACCGGTGGTGAAGAGTAACCAATGGTTTAAGAGCTATGCTGGAAACAGCATAGCAAGTTTAAATAAGGCTAGTCCGTTATCAACTTGAAAAAGTGGCACCGAGTCGGTGCTTTTTT
4|sgACSL3_4|ACSL3	TATCTAAAGTATCACATCCA	1925	0	749	385	3	1018	790	612	0	4328	1553	676	2403	1	1044	413	3956	2181	ACSL3	ACSL3	4|sg_hACSL3_04|ACSL3	ACSL3	ACCGTATCTAAAGTATCACATCCAGTTTAAGAGCTATGCTGGAAACAGCATAGCAAGTTTAAATAAGGCTAGTCCGTTATCAACTTGAAAAAGTGGCACCGAGTCGGTGCTTTTTT
4|sgACSL4_1|ACSL4	AAGCCCACTTCAGACAAACC	0	985	678	680	0	151	356	214	0	645	1068	313	1	0	343	1102	1942	2182	ACSL4	ACSL4	4|sg_hACSL4_01|ACSL4	ACSL4	ACCGAAGCCCACTTCAGACAAACCGTTTAAGAGCTATGCTGGAAACAGCATAGCAAGTTTAAATAAGGCTAGTCCGTTATCAACTTGAAAAAGTGGCACCGAGTCGGTGCTTTTTT
4|sgACSL4_2|ACSL4	ACCTGGTCAGAGAGTGTAAG	0	6	992	770	1	808	687	1006	0	0	1260	653	2	1593	1147	1427	2468	2182	ACSL4	ACSL4	4|sg_hACSL4_02|ACSL4	ACSL4	ACCGACCTGGTCAGAGAGTGTAAGGTTTAAGAGCTATGCTGGAAACAGCATAGCAAGTTTAAATAAGGCTAGTCCGTTATCAACTTGAAAAAGTGGCACCGAGTCGGTGCTTTTTT
4|sgACSL4_3|ACSL4	GCATCATCACTCCCTTAGGT	0	0	1205	800	1513	285	795	903	11608	1	866	932	1	2687	1160	2064	3613	2182	ACSL4	ACSL4	4|sg_hACSL4_03|ACSL4	ACSL4	ACCGGCATCATCACTCCCTTAGGTGTTTAAGAGCTATGCTGGAAACAGCATAGCAAGTTTAAATAAGGCTAGTCCGTTATCAACTTGAAAAAGTGGCACCGAGTCGGTGCTTTTTT
4|sgACSL4_4|ACSL4	GTGTGTCTGAGGAGATAGCG	0	1514	1071	784	1638	718	359	650	0	0	1412	868	2	3027	1441	1218	3362	2182	ACSL4	ACSL4	4|sg_hACSL4_04|ACSL4	ACSL4	ACCGGTGTGTCTGAGGAGATAGCGGTTTAAGAGCTATGCTGGAAACAGCATAGCAAGTTTAAATAAGGCTAGTCCGTTATCAACTTGAAAAAGTGGCACCGAGTCGGTGCTTTTTT
4|sgACSL5_1|ACSL5	CAGAGTTGGATTCTTCCAAG	0	1165	769	488	0	330	226	257	0	0	1234	625	1	0	470	1190	2201	51703	ACSL5	ACSL5	4|sg_hACSL5_01|ACSL5	ACSL5	ACCGCAGAGTTGGATTCTTCCAAGGTTTAAGAGCTATGCTGGAAACAGCATAGCAAGTTTAAATAAGGCTAGTCCGTTATCAACTTGAAAAAGTGGCACCGAGTCGGTGCTTTTTT
4|sgACSL5_2|ACSL5	CTTATCCCTATATGATGCTG	0	886	1197	804	0	1021	390	801	0	0	1403	474	2164	2112	1899	1187	2826	51703	ACSL5	ACSL5	4|sg_hACSL5_02|ACSL5	ACSL5	ACCGCTTATCCCTATATGATGCTGGTTTAAGAGCTATGCTGGAAACAGCATAGCAAGTTTAAATAAGGCTAGTCCGTTATCAACTTGAAAAAGTGGCACCGAGTCGGTGCTTTTTT
4|sgACSL5_3|ACSL5	CTTGTTGACAATATGTACGA	5090	559	718	469	0	781	289	248	0	0	531	185	1594	1	245	356	2005	51703	ACSL5	ACSL5	4|sg_hACSL5_03|ACSL5	ACSL5	ACCGCTTGTTGACAATATGTACGAGTTTAAGAGCTATGCTGGAAACAGCATAGCAAGTTTAAATAAGGCTAGTCCGTTATCAACTTGAAAAAGTGGCACCGAGTCGGTGCTTTTTT
4|sgACSL5_4|ACSL5	TCTGATAGAGCAGAGTACCT	3066	1520	286	245	0	640	120	197	0	1	304	161	1	0	977	1313	1897	51703	ACSL5	ACSL5	4|sg_hACSL5_04|ACSL5	ACSL5	ACCGTCTGATAGAGCAGAGTACCTGTTTAAGAGCTATGCTGGAAACAGCATAGCAAGTTTAAATAAGGCTAGTCCGTTATCAACTTGAAAAAGTGGCACCGAGTCGGTGCTTTTTT
4|sgACSL6_1|ACSL6	CTGAGATGCTAAGCCCACGG	1901	0	917	576	0	260	652	619	0	1	457	310	755	1297	828	708	2326	23305	ACSL6	ACSL6	4|sg_hACSL6_01|ACSL6	ACSL6	ACCGCTGAGATGCTAAGCCCACGGGTTTAAGAGCTATGCTGGAAACAGCATAGCAAGTTTAAATAAGGCTAGTCCGTTATCAACTTGAAAAAGTGGCACCGAGTCGGTGCTTTTTT
4|sgACSL6_2|ACSL6	GATGCTCACCCATGGGAACG	0	638	1081	609	3	827	1875	1066	0	0	1137	636	0	0	918	1268	3220	23305	ACSL6	ACSL6	4|sg_hACSL6_02|ACSL6	ACSL6	ACCGGATGCTCACCCATGGGAACGGTTTAAGAGCTATGCTGGAAACAGCATAGCAAGTTTAAATAAGGCTAGTCCGTTATCAACTTGAAAAAGTGGCACCGAGTCGGTGCTTTTTT
4|sgACSL6_3|ACSL6	TCTGTCGTCTATTGCCACGG	0	633	710	658	2892	554	560	498	0	0	773	716	1472	759	1055	918	2435	23305	ACSL6	ACSL6	4|sg_hACSL6_03|ACSL6	ACSL6	ACCGTCTGTCGTCTATTGCCACGGGTTTAAGAGCTATGCTGGAAACAGCATAGCAAGTTTAAATAAGGCTAGTCCGTTATCAACTTGAAAAAGTGGCACCGAGTCGGTGCTTTTTT
4|sgACSL6_4|ACSL6	GGGTGGTGGCCGAGAGGCTG	0	2202	1090	1271	11	212	179	1040	0	0	1176	685	0	0	836	760	2883	23305	ACSL6	ACSL6	4|sg_hACSL6_04|ACSL6	ACSL6	ACCGGGGTGGTGGCCGAGAGGCTGGTTTAAGAGCTATGCTGGAAACAGCATAGCAAGTTTAAATAAGGCTAGTCCGTTATCAACTTGAAAAAGTGGCACCGAGTCGGTGCTTTTTT
4|sgACSM1_1|ACSM1	CAAGGTCTTTGACTTAACAC	0	0	455	335	0	0	539	243	0	0	1310	430	0	0	482	225	1794	116285	ACSM1	ACSM1	4|sg_hACSM1_01|ACSM1	ACSM1	ACCGCAAGGTCTTTGACTTAACACGTTTAAGAGCTATGCTGGAAACAGCATAGCAAGTTTAAATAAGGCTAGTCCGTTATCAACTTGAAAAAGTGGCACCGAGTCGGTGCTTTTTT
4|sgACSM1_2|ACSM1	CCCCCCAAAAGTGGTTAATG	0	2613	1118	1010	1	883	919	812	0	3764	1743	780	1446	1	1011	774	2778	116285	ACSM1	ACSM1	4|sg_hACSM1_02|ACSM1	ACSM1	ACCGCCCCCCAAAAGTGGTTAATGGTTTAAGAGCTATGCTGGAAACAGCATAGCAAGTTTAAATAAGGCTAGTCCGTTATCAACTTGAAAAAGTGGCACCGAGTCGGTGCTTTTTT
4|sgACSM1_3|ACSM1	CGCTGTCCATGGTTCTACCA	0	1227	1359	777	2	666	159	830	1	0	1222	700	1347	890	861	928	2983	116285	ACSM1	ACSM1	4|sg_hACSM1_03|ACSM1	ACSM1	ACCGCGCTGTCCATGGTTCTACCAGTTTAAGAGCTATGCTGGAAACAGCATAGCAAGTTTAAATAAGGCTAGTCCGTTATCAACTTGAAAAAGTGGCACCGAGTCGGTGCTTTTTT
4|sgACSM1_4|ACSM1	GCACTGCTATACTGGCGGGG	0	580	1384	1008	557	2821	1320	1268	1	0	2244	1540	3778	4	2217	2717	4508	116285	ACSM1	ACSM1	4|sg_hACSM1_04|ACSM1	ACSM1	ACCGGCACTGCTATACTGGCGGGGGTTTAAGAGCTATGCTGGAAACAGCATAGCAAGTTTAAATAAGGCTAGTCCGTTATCAACTTGAAAAAGTGGCACCGAGTCGGTGCTTTTTT
4|sgACSM2A_1|ACSM2A	ACAGGCTCCCGAGAGGACGT	0	1571	824	616	0	563	225	473	0	3261	1063	531	2	0	1107	2035	2939	123876	ACSM2A	ACSM2A	4|sg_hACSM2A_01|ACSM2A	ACSM2A	ACCGACAGGCTCCCGAGAGGACGTGTTTAAGAGCTATGCTGGAAACAGCATAGCAAGTTTAAATAAGGCTAGTCCGTTATCAACTTGAAAAAGTGGCACCGAGTCGGTGCTTTTTT
4|sgACSM2A_2|ACSM2A	GTGCATGCTCCTAATGCCCA	0	0	788	478	2	111	402	545	1	1597	1164	508	818	2124	1595	3211	2520	123876	ACSM2A	ACSM2A	4|sg_hACSM2A_02|ACSM2A	ACSM2A	ACCGGTGCATGCTCCTAATGCCCAGTTTAAGAGCTATGCTGGAAACAGCATAGCAAGTTTAAATAAGGCTAGTCCGTTATCAACTTGAAAAAGTGGCACCGAGTCGGTGCTTTTTT
4|sgACSM2A_3|ACSM2A	TGACGCAGTTCTGTAGATGG	1	2228	1719	1136	3	499	596	1580	1398	6111	1837	981	6373	4	1763	1670	4341	123876	ACSM2A	ACSM2A	4|sg_hACSM2A_03|ACSM2A	ACSM2A	ACCGTGACGCAGTTCTGTAGATGGGTTTAAGAGCTATGCTGGAAACAGCATAGCAAGTTTAAATAAGGCTAGTCCGTTATCAACTTGAAAAAGTGGCACCGAGTCGGTGCTTTTTT
4|sgACSM2A_4|ACSM2A	TGTCTGAGAAAAGCTGTGAT	4	3	1097	1104	1	796	702	499	0	0	855	282	4145	1537	1146	1312	2085	123876	ACSM2A	ACSM2A	4|sg_hACSM2A_04|ACSM2A	ACSM2A	ACCGTGTCTGAGAAAAGCTGTGATGTTTAAGAGCTATGCTGGAAACAGCATAGCAAGTTTAAATAAGGCTAGTCCGTTATCAACTTGAAAAAGTGGCACCGAGTCGGTGCTTTTTT
4|sgACSM2B_1|ACSM2B	ATGTGGACCATATCAGACAC	0	0	453	389	2	665	1389	497	0	2048	773	597	2	2270	982	1442	3372	348158	ACSM2B	ACSM2B	4|sg_hACSM2B_01|ACSM2B	ACSM2B	ACCGATGTGGACCATATCAGACACGTTTAAGAGCTATGCTGGAAACAGCATAGCAAGTTTAAATAAGGCTAGTCCGTTATCAACTTGAAAAAGTGGCACCGAGTCGGTGCTTTTTT
4|sgACSM2B_2|ACSM2B	GAAGGGACTCCCCTCCAGCG	0	0	363	580	1063	337	812	669	0	1	581	382	0	971	814	1146	1807	348158	ACSM2B	ACSM2B	4|sg_hACSM2B_02|ACSM2B	ACSM2B	ACCGGAAGGGACTCCCCTCCAGCGGTTTAAGAGCTATGCTGGAAACAGCATAGCAAGTTTAAATAAGGCTAGTCCGTTATCAACTTGAAAAAGTGGCACCGAGTCGGTGCTTTTTT
4|sgACSM2B_3|ACSM2B	TGTCTGAGAAAAGCTGCGAT	1781	2824	1714	1162	1328	448	1750	997	0	0	1209	1050	1621	2103	1505	3767	4086	348158	ACSM2B	ACSM2B	4|sg_hACSM2B_03|ACSM2B	ACSM2B	ACCGTGTCTGAGAAAAGCTGCGATGTTTAAGAGCTATGCTGGAAACAGCATAGCAAGTTTAAATAAGGCTAGTCCGTTATCAACTTGAAAAAGTGGCACCGAGTCGGTGCTTTTTT
4|sgACSM2B_4|ACSM2B	TTACCTTTAGAATAACCAGT	0	0	643	646	1360	0	496	677	0	1672	460	708	2905	0	966	1181	2927	348158	ACSM2B	ACSM2B	4|sg_hACSM2B_04|ACSM2B	ACSM2B	ACCGTTACCTTTAGAATAACCAGTGTTTAAGAGCTATGCTGGAAACAGCATAGCAAGTTTAAATAAGGCTAGTCCGTTATCAACTTGAAAAAGTGGCACCGAGTCGGTGCTTTTTT
[truncated: 76,356 more rows]
